# Supplementary material for: A conserved role of CBP/p300 in mitochondrial stress response and longevity
Source: Research Square preprint supplement (doi:10.21203/rs.3.rs-86465/v1), 2020-10-14
Supplement: Supplementary file 1 [file 1000d9e80c75d7300290979b.xlsx]

## Sheet: Key notes
Supplementary Table 4. Jmjd-3.1 and jmjd-1.2 overexpression-induced UPRmt genes that also regulated by CBP-1
Gene
Wormbase Identifier
Direction	direction of gene expression change from wild-type worms grown on empty vector
DEG overlap	conditions where given gene was found to be significantly differentially expressed (padj < 0.05)
Mito	"Mito" indicates inclusion in the mitochondrial heatmap.
Oxphos	"Oxphos" indicates inclusion in the oxphos heatmap.
EV1	mean normalized counts for wild-type worms grown on empty vector, replicate 1 of 3
EV2	mean normalized counts for wild-type worms grown on empty vector, replicate 2 of 3
EV3	mean normalized counts for wild-type worms grown on empty vector, replicate 3 of 3
X_1	mean normalized counts for given condition X (see below), replicate 1 of 3
X_2	mean normalized counts for given condition X (see below), replicate 2 of 3
X_3	mean normalized counts for given condition X (see below), replicate 3 of 3 (omitted for rgef-1::jmjd-1.2)
Log2 FC	log2 of the fold change estimated for mean normalized counts for given condition / EV
lfcSE	standard error estimate for the Log2 fold change estimate, as reported by DESEq2
pval	p-value
padj	Benjamini-Hochberg adjusted p-value
Conditions:
cco-1	wild-type worms grown on cco-1 + empty vector RNAi bacteria ([cco-1 RNAi])
sur-5::jmjd-1.2	sur-5::jmjd-1.2 worms grown on empty vector bacteria ([jmjd-1.2])
rgef-1::jmjd-1.2	rgef-1::jmjd-1.2 worms grown on empty vector bacteria ([jmjd-1.2 neur.])
jmjd-3.1::jmjd-3.1	jmjd-3.1::jmjd-3.1 worms grown on empty vector bacteria ([jmjd-3.1])

## Sheet: J3.1 OE-UP & require CBP-1(177)
Gene	Wormbase Identifier	Direction	DEG overlap	EV1	EV2	EV3	cco-1_1	cco-1_2	cco-1_3	Log2 FC	lfcSE	pval	padj	sur-5::jmjd-1.2	sur-5::jmjd-1.2	sur-5::jmjd-1.2	Log2 FC	lfcSE	pval	padj	rgef-1::jmjd-1.2	rgef-1::jmjd-1.2	Log2 FC	lfcSE	pval	padj	jmjd-3.1::jmjd-3.1	jmjd-3.1::jmjd-3.1	jmjd-3.1::jmjd-3.1	Log2 FC	lfcSE	pval	padj
ZK370.8	WBGene00022722	UP-REGULATED	[cco-1 RNAi] and [jmjd-3.1] and [jmjd-1.2 neur.]:	673.932	588.954	760.703	1207.47	1045.06	1169.67	0.722689	0.200742	0.00031812	0.00357027	770.523	783.442	832.284					1676.08	978.145	0.922935	0.221794	3.16549e-05	0.000336402	1344.08	1331.67	1019.71	0.828274	0.200599	3.64338e-05	0.00018863
hsp-6	WBGene00002010	UP-REGULATED	[cco-1 RNAi] and [jmjd-3.1] and [jmjd-1.2 neur.]:	2451.28	3573.39	3607.42	6539.23	6240.94	7559.2	1.01946	0.215937	2.34555e-06	6.32698e-05	3516.54	2750.45	2843.38					6851.83	3954.27	0.703851	0.238006	0.00310369	0.0137119	6546.59	5647.33	5422.95	0.823024	0.215952	0.000138326	0.00061787
F18A12.4	WBGene00017553	UP-REGULATED	[cco-1 RNAi] and [jmjd-3.1] and [jmjd-1.2 neur.]:	61.1122	88.4957	60.1034	136.448	148.339	132.737	0.8791	0.286309	0.0021373	0.0158741	86.0691	89.2662	116.865					277.925	102.728	1.27705	0.311462	4.12867e-05	0.000414216	269.628	330.289	235.393	1.79284	0.28363	2.59759e-10	5.0585e-09
F27D9.2	WBGene00017861	UP-REGULATED	[cco-1 RNAi] and [jmjd-3.1] and [jmjd-1.2 neur.]:	91.6684	64.0831	85.6018	208.411	144.33	200.807	1.15172	0.217594	1.20333e-07	5.13647e-06	121.931	97.6678	98.5733					166.999	144.414	0.9073	0.243906	0.000199319	0.00147566	198.972	223.405	167.149	1.23128	0.216982	1.3905e-08	1.76482e-07
H28G03.1	WBGene00019249	UP-REGULATED	[cco-1 RNAi] and [jmjd-3.1] and [jmjd-1.2 neur.]:	203.707	336.436	275.019	809.343	692.25	920.083	1.46691	0.229399	1.61006e-10	1.45634e-08	378.089	369.667	304.866					780.141	437.709	1.07692	0.253242	2.11386e-05	0.000239641	785.331	714.021	636.947	1.29534	0.229492	1.65779e-08	2.06643e-07
sur-5	WBGene00006351	UP-REGULATED	[cco-1 RNAi] and [jmjd-3.1] and [jmjd-1.2 neur.]:	420.995	405.097	409.796	721.493	698.931	723.814	0.768161	0.17446	1.06729e-05	0.000229985	491.823	539.798	594.489					1270.17	814.376	1.28539	0.192853	2.6441e-11	1.98146e-09	769.9	889.24	750.688	0.930779	0.174113	9.00045e-08	9.2709e-07
clu-1	WBGene00000550	UP-REGULATED	[cco-1 RNAi] and [jmjd-3.1] and [jmjd-1.2 neur.]:	881.035	644.645	799.558	1516.82	1435.28	1443.09	0.870324	0.2157	5.46293e-05	0.000857389	857.617	1068.04	1263.16					1928.41	1051.1	0.888074	0.237902	0.000189263	0.00140906	1821.61	1686.49	1804.02	1.12934	0.215524	1.60608e-07	1.55388e-06
pde-3	WBGene00008443	UP-REGULATED	[cco-1 RNAi] and [jmjd-3.1] and [jmjd-1.2 neur.]:	37.3464	55.6913	55.2466	119.626	106.911	137.842	1.19067	0.225078	1.22281e-07	5.19046e-06	56.3547	47.2586	50.811					109.707	95.2835	0.940671	0.253884	0.000211286	0.00154633	140.499	119.149	99.8939	1.16543	0.224908	2.19739e-07	2.03871e-06
clec-17	WBGene00008477	UP-REGULATED	[cco-1 RNAi] and [jmjd-3.1] and [jmjd-1.2 neur.]:	0	1.52579	0.607105	17.757	6.68195	24.9591	2.0157	0.467915	1.6487e-05	0.000323274	10.2463	1.05019	2.03244					15.8466	2.97761	1.41667	0.477346	0.00299929	0.013343	25.1761	18.3981	12.8576	2.13058	0.467344	5.14212e-06	3.35866e-05
F34H10.3	WBGene00009380	UP-REGULATED	[cco-1 RNAi] and [jmjd-3.1] and [jmjd-1.2 neur.]:	62.8098	65.6089	77.1024	236.448	155.021	204.211	1.41762	0.246922	9.40315e-09	5.43309e-07	136.276	113.421	69.1029					145.057	107.194	0.804011	0.276549	0.00364566	0.0155552	154.305	171.715	151.324	1.11392	0.247819	6.96097e-06	4.37263e-05
cyp-14A1	WBGene00010705	UP-REGULATED	[cco-1 RNAi] and [jmjd-3.1] and [jmjd-1.2 neur.]:	15.2781	13.7321	18.2132	54.2054	56.1283	77.7135	1.67208	0.343212	1.10548e-06	3.43535e-05	26.6404	10.5019	31.5028					68.2623	29.7761	1.33508	0.374022	0.000357617	0.0023884	61.722	65.7074	41.54	1.52993	0.343703	8.53514e-06	5.21841e-05
C46C2.2	WBGene00008110	UP-REGULATED	[cco-1 RNAi] and [jmjd-3.1] and [jmjd-1.2 neur.]:	387.044	421.117	502.683	1240.18	991.601	1207.11	1.27112	0.266599	1.86143e-06	5.21886e-05	629.124	497.79	422.747					1232.38	495.772	0.888931	0.291849	0.00232018	0.0108958	1141.04	954.948	762.556	1.02604	0.266692	0.000119425	0.000541833
cpna-1	WBGene00006495	UP-REGULATED	[cco-1 RNAi] and [jmjd-3.1] and [jmjd-1.2 neur.]:	448.156	402.045	340.586	732.708	566.629	703.96	0.722608	0.199447	0.000291141	0.00331151	573.794	374.918	384.131					864.25	669.962	0.903936	0.220599	4.17391e-05	0.000416921	715.487	671.968	661.673	0.75218	0.199301	0.000160592	0.000701588
cyp-13A12	WBGene00008810	UP-REGULATED	[cco-1 RNAi] and [jmjd-3.1] and [jmjd-1.2 neur.]:	13.5805	5.34026	14.5705	85.981	82.8561	107.778	2.38024	0.395079	1.69388e-09	1.19168e-07	21.5173	8.40153	28.4542					52.4157	11.9104	1.14114	0.424956	0.00724633	0.0266511	55.2249	45.5571	25.7153	1.44608	0.398284	0.000282565	0.00115371
DC2.5	WBGene00017082	UP-REGULATED	[cco-1 RNAi] and [jmjd-3.1] and [jmjd-1.2 neur.]:	202.01	157.919	203.38	545.793	529.21	613.199	1.47227	0.248851	3.29334e-09	2.14788e-07	163.941	134.424	221.536					410.793	224.81	0.702812	0.275273	0.0106756	0.0362177	440.987	388.988	270.01	0.89664	0.249589	0.000327563	0.00131235
pcp-2	WBGene00003957	UP-REGULATED	[cco-1 RNAi] and [jmjd-3.1] and [jmjd-1.2 neur.]:	263.122	203.693	390.369	487.849	379.534	538.889	0.656788	0.254125	0.00975179	0.0497777	564.572	357.065	315.028					709.441	716.115	1.19357	0.277996	1.75898e-05	0.000204642	618.032	479.226	497.491	0.822649	0.253815	0.00119054	0.00403065
emb-8	WBGene00001262	UP-REGULATED	[cco-1 RNAi] and [jmjd-3.1] and [jmjd-1.2 neur.]:	1531.2	1354.9	1875.35	2248.59	2458.96	2656.44	0.608897	0.165899	0.000242276	0.00288077	1898.64	1732.81	1726.56					2658.57	2268.94	0.610507	0.184194	0.00091813	0.0051348	2239.86	2682.61	2045.35	0.531411	0.165897	0.0013588	0.00450636
sprr-2	WBGene00009629	UP-REGULATED	[cco-1 RNAi] and [jmjd-3.1] and [jmjd-1.2 neur.]:	6.79025	8.39183	13.3563	26.1681	29.4006	26.6608	1.19216	0.327173	0.000268623	0.00311365	27.6651	16.8031	14.2271					34.1312	43.1753	1.60463	0.352588	5.33885e-06	7.54147e-05	54.4128	50.8137	47.4743	2.01426	0.317591	2.26326e-10	4.48045e-09
T15B7.10	WBGene00020522	UP-REGULATED	[cco-1 RNAi] and [jmjd-3.1] and [jmjd-1.2 neur.]:	0	0.762894	1.82132	11.2149	9.35472	5.67252	1.46387	0.468384	0.0017758	0.0137226	3.0739	3.15057	3.04866					8.53279	7.44402	1.31856	0.477456	0.00575112	0.0221363	16.2426	2.6283	12.8576	1.68787	0.466888	0.000300165	0.00121696
R173.3	WBGene00020125	UP-REGULATED	[cco-1 RNAi] and [jmjd-3.1] and [jmjd-1.2 neur.]:	5.09269	6.10315	4.85684	13.0841	20.0458	24.3918	1.35364	0.395211	0.00061453	0.00595941	20.4926	9.45172	7.11354					20.7225	19.3545	1.36462	0.423228	0.00126278	0.00662387	50.3521	33.2918	25.7153	2.13628	0.387696	3.58431e-08	4.08993e-07
Y73B6BL.31	WBGene00022252	UP-REGULATED	[cco-1 RNAi] and [jmjd-3.1] and [jmjd-1.2 neur.]:	50.9269	37.3818	64.3532	105.607	60.1375	87.9241	0.674493	0.258242	0.00900484	0.0468467	81.9705	74.5636	91.4598					129.211	89.3283	0.999294	0.283554	0.000424807	0.00275193	138.874	145.432	119.675	1.28855	0.254296	4.03859e-07	3.51862e-06
fkh-9	WBGene00001441	UP-REGULATED	[cco-1 RNAi] and [jmjd-3.1] and [jmjd-1.2 neur.]:	147.688	259.384	290.196	483.176	596.03	527.544	1.11333	0.229403	1.21503e-06	3.74515e-05	310.463	237.343	206.293					520.5	390.067	0.887572	0.253483	0.000462637	0.00294677	581.486	526.535	553.867	1.16036	0.229229	4.14809e-07	3.60277e-06
Y75B8A.6	WBGene00013543	UP-REGULATED	[cco-1 RNAi] and [jmjd-3.1] and [jmjd-1.2 neur.]:	91.6684	110.62	143.884	376.634	217.831	368.714	1.35359	0.255629	1.18938e-07	5.0912e-06	110.66	108.17	79.2651					269.392	169.724	0.833212	0.2828	0.00321608	0.0140901	259.07	208.512	278.912	1.0067	0.256247	8.54228e-05	0.000402182
sptl-2	WBGene00018398	UP-REGULATED	[cco-1 RNAi] and [jmjd-3.1] and [jmjd-1.2 neur.]:	268.215	213.61	272.59	382.242	428.981	378.924	0.630015	0.191876	0.00102543	0.00884866	305.34	311.907	334.336					636.303	467.485	1.08002	0.211868	3.43951e-07	7.7654e-06	462.103	476.598	328.364	0.71997	0.191493	0.000170066	0.000737967
Y54G11A.7	WBGene00013216	UP-REGULATED	[cco-1 RNAi] and [jmjd-3.1] and [jmjd-1.2 neur.]:	850.479	839.946	800.165	2016.82	1829.52	2124.36	1.18401	0.230178	2.69118e-07	1.04591e-05	826.878	965.125	1032.48					2129.54	1009.41	0.854896	0.253434	0.000742873	0.00432606	1588.53	1756.58	1201.69	0.814518	0.230303	0.000405128	0.00158452
gdh-1	WBGene00014095	UP-REGULATED	[cco-1 RNAi] and [jmjd-3.1] and [jmjd-1.2 neur.]:	4695.46	10528.7	7232.44	13824.3	11959.3	14524.5	0.77677	0.257867	0.00259284	0.0184806	6841.47	8321.71	5848.34					16932.7	9631.08	0.749102	0.282178	0.00793765	0.0286653	12720.4	13951	11789.5	0.714307	0.257866	0.00560433	0.0153471
W06H3.3	WBGene00012316	UP-REGULATED	[cco-1 RNAi] and [jmjd-3.1] and [jmjd-1.2 neur.]:	417.6	380.684	448.651	702.801	628.103	664.252	0.650328	0.189158	0.000586005	0.00574883	393.459	479.937	562.986					871.564	550.858	0.73906	0.209815	0.000427614	0.00276314	700.057	692.994	715.082	0.72608	0.188937	0.000121556	0.000550753
F48G7.8	WBGene00018619	UP-REGULATED	[cco-1 RNAi] and [jmjd-3.1] and [jmjd-1.2 neur.]:	23.7659	37.3818	37.6405	67.2895	130.966	74.31	1.2051	0.33872	0.000373977	0.00406506	93.2415	61.9613	25.4055					86.5469	65.5074	0.980825	0.367527	0.00761421	0.0277119	88.5223	83.2294	69.2334	1.06319	0.339024	0.0017126	0.00551035
T07D3.6	WBGene00020309	UP-REGULATED	[cco-1 RNAi] and [jmjd-3.1] and [jmjd-1.2 neur.]:	0	0.762894	0	8.41119	4.00917	6.23977	1.57347	0.473606	0.00089271	0.00794466	5.12316	3.15057	2.03244					2.43794	8.93283	1.34495	0.47603	0.00472283	0.0189847	4.06066	5.25659	5.93429	1.35503	0.47455	0.00429826	0.0121949
adt-1	WBGene00000082	UP-REGULATED	[cco-1 RNAi] and [jmjd-3.1] and [jmjd-1.2] and [jmjd-1.2 neur.]	71.2976	57.9799	35.8192	113.084	114.929	89.6258	0.889204	0.252043	0.000418745	0.00443434	340.178	273.05	205.276	2.17078	0.247252	1.64033e-18	9.93007e-16	208.444	247.142	1.9113	0.271744	2.01477e-12	1.96096e-10	430.429	347.811	368.915	2.63038	0.245719	9.66122e-27	2.56528e-24
ugt-2	WBGene00007073	UP-REGULATED	[cco-1 RNAi] and [jmjd-3.1] and [jmjd-1.2] and [jmjd-1.2 neur.]	47.5317	44.2478	40.0689	160.747	223.177	256.398	2.09273	0.257874	4.84562e-16	1.38932e-13	153.695	111.32	143.287	1.48668	0.260817	1.19758e-08	5.70684e-07	296.21	180.145	2.22032	0.281535	3.1082e-15	5.97748e-13	283.434	313.643	206.711	2.39818	0.256857	9.9436e-21	1.35233e-18
ugt-62	WBGene00010904	UP-REGULATED	[cco-1 RNAi] and [jmjd-3.1] and [jmjd-1.2] and [jmjd-1.2 neur.]	560.196	630.913	893.052	4822.41	3798.02	4978.77	2.46209	0.267827	3.82532e-20	2.15295e-17	4501.21	2621.28	2915.53	2.06018	0.267913	1.47408e-14	3.39349e-12	4250.55	2124.52	1.98833	0.292596	1.0794e-11	8.88114e-10	4781.02	5347.71	3662.45	2.48055	0.267813	2.00222e-20	2.53736e-18
ugt-19	WBGene00019515	UP-REGULATED	[cco-1 RNAi] and [jmjd-3.1] and [jmjd-1.2] and [jmjd-1.2 neur.]	108.644	64.846	127.492	518.69	538.565	694.317	2.31378	0.271252	1.46309e-17	6.00896e-15	226.444	180.633	231.698	0.978572	0.273888	0.000353071	0.00284895	385.195	209.921	1.41764	0.298086	1.97635e-06	3.31023e-05	462.103	537.049	323.419	1.93983	0.271594	9.17402e-13	3.06313e-11
ugt-12	WBGene00020592	UP-REGULATED	[cco-1 RNAi] and [jmjd-3.1] and [jmjd-1.2] and [jmjd-1.2 neur.]	303.864	521.819	550.037	983.174	1150.63	1116.35	1.13165	0.258873	1.23427e-05	0.000257637	1137.34	1163.61	1071.1	1.18066	0.258918	5.11623e-06	9.021e-05	2257.53	1122.56	1.70339	0.282986	1.75131e-09	8.22188e-08	1868.71	2125.42	1316.42	1.78552	0.25854	4.97935e-12	1.42682e-10
apy-1	WBGene00017244	UP-REGULATED	[cco-1 RNAi] and [jmjd-3.1] and [jmjd-1.2] and [jmjd-1.2 neur.]	840.293	655.326	970.761	1457.94	1420.58	1745.43	0.848878	0.23131	0.000242679	0.0028833	2178.37	1258.13	1677.78	0.984758	0.231305	2.06823e-05	0.000277775	2420.88	1935.45	1.30494	0.254142	2.82619e-07	6.62432e-06	2719.01	2694	1776.33	1.44627	0.231045	3.85738e-10	7.18555e-09
pgp-9	WBGene00004003	UP-REGULATED	[cco-1 RNAi] and [jmjd-3.1] and [jmjd-1.2] and [jmjd-1.2 neur.]	145.99	161.733	216.737	455.139	578.656	718.141	1.58278	0.266102	2.71399e-09	1.78536e-07	412.927	286.702	237.795	0.753996	0.267523	0.00482588	0.023275	670.434	336.47	1.37363	0.291405	2.4311e-06	3.96377e-05	622.905	632.543	537.053	1.61226	0.265991	1.34987e-09	2.20729e-08
cyp-33E2	WBGene00018334	UP-REGULATED	[cco-1 RNAi] and [jmjd-3.1] and [jmjd-1.2] and [jmjd-1.2 neur.]	44.1366	42.7221	56.4608	91.5885	84.1925	121.959	0.963421	0.253049	0.000140516	0.00185033	160.867	115.521	142.271	1.40903	0.251334	2.0684e-08	9.01548e-07	177.97	123.571	1.50128	0.275654	5.14429e-08	1.52627e-06	155.929	161.202	106.817	1.42853	0.250204	1.13321e-08	1.47406e-07
K09E9.1	WBGene00010724	UP-REGULATED	[cco-1 RNAi] and [jmjd-3.1] and [jmjd-1.2] and [jmjd-1.2 neur.]	66.2049	56.4541	69.21	250.466	175.067	254.129	1.65759	0.27447	1.54825e-09	1.10457e-07	108.611	143.876	110.768	0.826328	0.277961	0.00295081	0.0157456	275.487	113.149	1.43989	0.301087	1.73298e-06	2.97439e-05	210.342	241.803	176.051	1.54945	0.27456	1.66737e-08	2.07528e-07
F25B3.5	WBGene00009102	UP-REGULATED	[cco-1 RNAi] and [jmjd-3.1] and [jmjd-1.2] and [jmjd-1.2 neur.]	13.5805	28.99	24.2842	51.4017	85.5289	80.5498	1.45955	0.281175	2.09289e-07	8.3474e-06	82.9952	53.5597	57.9245	1.31255	0.283776	3.74062e-06	6.97155e-05	45.1019	44.6641	0.84002	0.318915	0.00843878	0.030025	78.7767	75.3445	68.2443	1.49315	0.280552	1.02525e-07	1.04328e-06
cyp-13A5	WBGene00011672	UP-REGULATED	[cco-1 RNAi] and [jmjd-3.1] and [jmjd-1.2] and [jmjd-1.2 neur.]	8.48781	3.05158	6.07105	27.1027	13.3639	24.3918	1.40343	0.395248	0.000384145	0.00415183	56.3547	42.0076	43.6974	2.32626	0.389354	2.30553e-09	1.30847e-07	26.8173	26.7985	1.61808	0.419832	0.000116149	0.000956644	42.2308	53.442	13.8467	2.01571	0.390004	2.36071e-07	2.17936e-06
hrg-1	WBGene00019830	UP-REGULATED	[cco-1 RNAi] and [jmjd-3.1] and [jmjd-1.2] and [jmjd-1.2 neur.]	468.527	711.78	487.505	1230.84	1368.46	1363.11	1.16504	0.234685	6.89573e-07	2.29797e-05	910.898	993.481	832.284	0.664872	0.235131	0.00468893	0.022742	1281.14	668.473	0.755009	0.258504	0.00349259	0.0150388	1352.2	1372.85	978.169	1.07382	0.23469	4.75131e-06	3.12913e-05
ZK1290.14	WBGene00044396	UP-REGULATED	[cco-1 RNAi] and [jmjd-3.1] and [jmjd-1.2] and [jmjd-1.2 neur.]	56.0196	56.4541	50.3897	89.7193	85.5289	87.3568	0.646559	0.238557	0.00672246	0.0375752	110.66	113.421	104.671	0.949973	0.237466	6.32197e-05	0.000701987	108.488	87.8395	0.798982	0.265188	0.0025877	0.0118863	133.189	94.6187	70.2224	0.823149	0.236871	0.000510673	0.00193212
twk-7	WBGene00006662	UP-REGULATED	[cco-1 RNAi] and [jmjd-3.1] and [jmjd-1.2] and [jmjd-1.2 neur.]	23.7659	24.4126	14.5705	65.4203	56.1283	57.8597	1.33373	0.312927	2.02503e-05	0.000384194	66.6011	45.1582	29.4704	1.02543	0.316855	0.00121105	0.00772625	63.3865	75.929	1.5045	0.340063	9.68058e-06	0.000124313	108.826	94.6187	58.3538	1.82925	0.309524	3.42332e-09	5.00571e-08
cyp-33C9	WBGene00016860	UP-REGULATED	[cco-1 RNAi] and [jmjd-3.1] and [jmjd-1.2] and [jmjd-1.2 neur.]	113.737	105.279	139.027	216.822	181.749	207.614	0.699151	0.247029	0.00465134	0.0286741	236.69	169.081	183.936	0.660229	0.247653	0.00767734	0.033463	362.034	221.832	1.18049	0.27044	1.27082e-05	0.000155321	321.604	440.678	246.273	1.38309	0.245061	1.6629e-08	2.07125e-07
Y47D7A.16	WBGene00044637	UP-REGULATED	[cco-1 RNAi] and [jmjd-3.1] and [jmjd-1.2] and [jmjd-1.2 neur.]	71.2976	103.754	123.849	238.317	236.541	243.918	1.17405	0.191478	8.70613e-10	6.71565e-08	146.522	163.83	156.498	0.574903	0.195501	0.00327511	0.0171466	238.918	214.388	1.08989	0.21421	3.61993e-07	8.10397e-06	226.585	201.503	181.985	0.947085	0.19221	8.33513e-07	6.67697e-06
crtc-1	WBGene00021237	UP-REGULATED	[cco-1 RNAi] and [jmjd-3.1] and [jmjd-1.2] and [jmjd-1.2 neur.]	25.4634	28.2271	35.2121	160.747	100.229	181.521	2.08461	0.258655	7.66488e-16	2.11774e-13	142.424	109.22	107.719	1.79042	0.260871	6.73074e-12	7.71604e-10	224.291	150.369	2.37673	0.281143	2.81963e-17	7.99133e-15	229.021	210.264	219.569	2.61063	0.256528	2.51775e-24	5.19962e-22
pab-2	WBGene00003903	UP-REGULATED	[cco-1 RNAi] and [jmjd-3.1] and [jmjd-1.2] and [jmjd-1.2 neur.]	285.19	189.961	231.307	666.353	674.876	718.708	1.44355	0.238017	1.32035e-09	9.60004e-08	674.208	447.381	450.185	1.07855	0.238638	6.19563e-06	0.000105049	1293.33	687.828	1.92079	0.260879	1.80106e-13	2.26366e-11	1312.4	1088.99	1129.49	2.1722	0.23736	5.61367e-20	6.38812e-18
vhp-1	WBGene00006923	UP-REGULATED	[cco-1 RNAi] and [jmjd-3.1] and [jmjd-1.2] and [jmjd-1.2 neur.]	76.3903	64.0831	74.6739	204.672	148.339	225.199	1.34445	0.232215	7.05214e-09	4.20253e-07	126.03	126.023	94.5084	0.641922	0.236637	0.0066739	0.0300841	237.699	141.436	1.31088	0.256951	3.36679e-07	7.67725e-06	358.962	328.537	306.605	2.07667	0.229789	1.60608e-19	1.70042e-17
F40F4.6	WBGene00018237	UP-REGULATED	[cco-1 RNAi] and [jmjd-3.1] and [jmjd-1.2] and [jmjd-1.2 neur.]	1981.06	2108.64	2065.37	4110.27	4077.32	3836.89	0.921812	0.197138	2.92558e-06	7.67825e-05	6202.1	4370.89	3370.8	1.12607	0.197119	1.11257e-08	5.37015e-07	5523.15	7110.53	1.53824	0.217619	1.56636e-12	1.56264e-10	6772.36	6793.27	6125.18	1.60221	0.196996	4.18196e-16	2.58139e-14
C02B10.3	WBGene00015328	UP-REGULATED	[cco-1 RNAi] and [jmjd-3.1] and [jmjd-1.2] and [jmjd-1.2 neur.]	61.1122	76.2894	110.493	306.541	212.486	268.877	1.49078	0.26976	3.27029e-08	1.67325e-06	398.582	207.938	251.006	1.60065	0.269812	2.98414e-09	1.64783e-07	464.428	355.824	2.05657	0.293462	2.41837e-12	2.2776e-10	518.952	435.421	341.222	2.14968	0.268476	1.17562e-15	6.7813e-14
W02G9.4	WBGene00020954	UP-REGULATED	[cco-1 RNAi] and [jmjd-3.1] and [jmjd-1.2] and [jmjd-1.2 neur.]	100.156	80.8667	119.6	170.093	145.666	165.07	0.638367	0.213335	0.00276868	0.0194709	150.621	166.98	133.125	0.546166	0.214707	0.0109661	0.0442352	263.298	227.787	1.21114	0.234034	2.27871e-07	5.4696e-06	359.774	384.607	260.12	1.64971	0.209318	3.23865e-15	1.742e-13
ZK970.1	WBGene00014171	UP-REGULATED	[cco-1 RNAi] and [jmjd-3.1] and [jmjd-1.2] and [jmjd-1.2 neur.]	45.8342	47.2994	67.3887	149.532	122.948	134.439	1.23258	0.223889	3.68504e-08	1.85423e-06	134.227	116.571	98.5733	1.02071	0.226318	6.48074e-06	0.000108979	123.116	102.728	0.981873	0.251872	9.68702e-05	0.000818984	191.663	193.618	147.368	1.60171	0.221708	5.03294e-13	1.77244e-11
K08H10.6	WBGene00010698	UP-REGULATED	[cco-1 RNAi] and [jmjd-3.1] and [jmjd-1.2] and [jmjd-1.2 neur.]	23.7659	28.99	36.4263	61.682	54.7919	51.0527	0.779269	0.260998	0.00282902	0.0197449	82.9952	68.2624	49.7948	1.02729	0.260222	7.88856e-05	0.000841635	81.671	68.485	1.17358	0.285932	4.05358e-05	0.000408222	124.256	104.256	92.9705	1.66617	0.253383	4.84301e-11	1.10978e-09
ugt-16	WBGene00013901	UP-REGULATED	[cco-1 RNAi] and [jmjd-3.1] and [jmjd-1.2] and [jmjd-1.2 neur.]	98.4586	94.5988	244.663	370.092	494.464	617.17	1.43757	0.354873	5.10109e-05	0.000809655	459.035	221.59	380.066	1.03434	0.355268	0.00359759	0.0184161	1272.61	413.888	2.03579	0.379527	8.13879e-08	2.23215e-06	907.962	841.055	581.56	1.98927	0.354555	2.0162e-08	2.44044e-07
F54C1.1	WBGene00018789	UP-REGULATED	[cco-1 RNAi] and [jmjd-3.1] and [jmjd-1.2] and [jmjd-1.2 neur.]	16.9756	25.9384	17.6061	57.0092	64.1467	46.5147	1.19782	0.339167	0.000412983	0.00439474	79.9213	40.9574	50.811	1.23659	0.339895	0.000274587	0.00234073	32.9122	108.683	1.46703	0.365311	5.92377e-05	0.000555554	86.898	98.9992	92.9705	1.85023	0.335534	3.50194e-08	4.00413e-07
tpra-1	WBGene00008366	UP-REGULATED	[cco-1 RNAi] and [jmjd-3.1] and [jmjd-1.2] and [jmjd-1.2 neur.]	52.6244	34.3302	72.8526	118.691	89.5381	119.69	0.948591	0.256509	0.000217242	0.00262625	112.709	76.6639	83.33	0.694274	0.259188	0.00739189	0.0325048	108.488	114.638	0.959608	0.283842	0.000722788	0.00423692	151.869	162.078	137.478	1.37108	0.254109	6.82871e-08	7.25274e-07
fbxa-74	WBGene00021262	UP-REGULATED	[cco-1 RNAi] and [jmjd-3.1] and [jmjd-1.2] and [jmjd-1.2 neur.]	40.7415	48.8252	82.5663	200.934	122.948	153.725	1.29824	0.281057	3.85349e-06	9.72717e-05	139.35	92.4168	111.784	0.86251	0.283468	0.0023446	0.0130838	165.78	126.548	1.17267	0.308396	0.000143264	0.00112705	162.426	120.026	204.733	1.32007	0.280749	2.57693e-06	1.81962e-05
crh-1	WBGene00000793	UP-REGULATED	[cco-1 RNAi] and [jmjd-3.1] and [jmjd-1.2] and [jmjd-1.2 neur.]	135.805	204.456	105.636	228.971	264.605	249.024	0.677873	0.247356	0.00613515	0.0352342	330.956	433.729	239.828	1.08419	0.246682	1.10715e-05	0.000168967	279.144	259.052	0.788586	0.272289	0.00377782	0.0159866	365.459	305.758	296.714	1.03527	0.24634	2.63872e-05	0.000141431
nas-4	WBGene00003523	UP-REGULATED	[cco-1 RNAi] and [jmjd-3.1] and [jmjd-1.2] and [jmjd-1.2 neur.]	61.1122	61.0315	82.5663	160.747	126.957	149.755	0.990179	0.266117	0.000198564	0.00245116	193.655	112.37	114.833	0.935528	0.266981	0.000458141	0.00353056	129.211	123.571	0.794997	0.294357	0.00691743	0.0256245	142.123	192.742	101.872	0.986601	0.265861	0.000206468	0.000872891
ugt-13	WBGene00019232	UP-REGULATED	[cco-1 RNAi] and [jmjd-3.1] and [jmjd-1.2] and [jmjd-1.2 neur.]	145.99	161.733	180.917	259.812	478.427	369.281	1.07324	0.263633	4.68198e-05	0.000754479	300.217	307.706	263.201	0.756988	0.264507	0.00421141	0.0209609	302.305	361.78	0.926116	0.289397	0.00137354	0.00710446	293.991	485.359	222.536	0.94328	0.263723	0.000347846	0.00138674
F53F8.4	WBGene00010001	UP-REGULATED	[cco-1 RNAi] and [jmjd-3.1] and [jmjd-1.2] and [jmjd-1.2 neur.]	62.8098	77.8152	62.5318	78.5044	177.74	110.614	0.760223	0.261949	0.0037057	0.0242469	153.695	142.826	122.963	0.952516	0.261716	0.000273166	0.00233154	115.802	160.791	0.924587	0.28809	0.00133027	0.00691655	129.941	148.061	118.686	0.878987	0.261083	0.000760747	0.00273614
T19A5.3	WBGene00020554	UP-REGULATED	[cco-1 RNAi] and [jmjd-3.1] and [jmjd-1.2] and [jmjd-1.2 neur.]	446.459	511.139	798.95	1064.48	799.161	952.416	0.63286	0.233949	0.00682792	0.0380062	1124.02	908.415	735.743	0.608964	0.234075	0.00927955	0.0387715	1066.6	863.507	0.665838	0.257444	0.00970007	0.0335571	1249.06	907.638	966.3	0.772253	0.233787	0.00095574	0.00333284
mltn-9	WBGene00008964	UP-REGULATED	[cco-1 RNAi] and [jmjd-3.1] and [jmjd-1.2] and [jmjd-1.2 neur.]	190.127	148.764	451.686	802.801	371.516	1001.77	1.22047	0.347378	0.00044246	0.00462422	875.036	520.895	672.737	1.15682	0.347471	0.0008708	0.005901	914.228	451.108	1.12855	0.37278	0.00246676	0.0114494	601.789	600.128	692.334	1.04904	0.34742	0.00253188	0.00771602
cdr-5	WBGene00010473	UP-REGULATED	[cco-1 RNAi] and [jmjd-3.1] and [jmjd-1.2] and [jmjd-1.2 neur.]	37.3464	39.6705	62.5318	714.016	561.283	841.235	3.29411	0.3323	3.65356e-23	2.92208e-20	214.148	206.888	270.314	1.88999	0.333868	1.50578e-08	6.95255e-07	694.813	205.455	2.70158	0.358014	4.48819e-14	6.75853e-12	1051.71	1176.6	576.615	3.65146	0.33208	4.00626e-28	1.17573e-25
tag-341	WBGene00014051	UP-REGULATED	[cco-1 RNAi] and [jmjd-3.1] and [jmjd-1.2] and [jmjd-1.2 neur.]	61.1122	35.0931	52.8182	121.495	106.911	104.374	1.08482	0.246625	1.08932e-05	0.000233803	196.729	116.571	129.06	1.46974	0.245322	2.08467e-09	1.19558e-07	235.261	177.168	1.91019	0.266762	8.02997e-13	8.66043e-11	347.592	296.997	319.463	2.53005	0.240862	8.26803e-26	2.00446e-23
nhr-85	WBGene00003675	UP-REGULATED	[cco-1 RNAi] and [jmjd-3.1] and [jmjd-1.2] and [jmjd-1.2 neur.]	22.0683	19.0723	15.7847	40.1868	40.0917	43.1112	0.982957	0.303281	0.0011908	0.00998089	52.2562	70.3628	63.0056	1.50789	0.299876	4.94602e-07	1.27916e-05	120.678	72.9514	2.07555	0.321074	1.01704e-10	6.68065e-09	210.342	144.556	107.806	2.7257	0.291757	9.42182e-21	1.29187e-18
C35A5.6	WBGene00007950	UP-REGULATED	[cco-1 RNAi] and [jmjd-3.1] and [jmjd-1.2] and [jmjd-1.2 neur.]	54.322	38.9076	50.3897	95.3268	106.911	95.8656	0.989642	0.238108	3.23471e-05	0.000568262	115.783	64.0616	82.3138	0.8207	0.240764	0.000652642	0.00466234	115.802	108.683	1.14927	0.263563	1.29758e-05	0.000158227	121.82	119.149	100.883	1.18246	0.236472	5.72076e-07	4.76816e-06
M60.4	WBGene00019780	UP-REGULATED	[cco-1 RNAi] and [jmjd-3.1] and [jmjd-1.2] and [jmjd-1.2 neur.]	147.688	121.3	111.707	171.962	160.367	246.755	0.59883	0.213021	0.00493683	0.0301164	244.887	198.486	198.163	0.727707	0.213094	0.0006379	0.00457302	224.291	184.612	0.664606	0.237103	0.00506249	0.0200415	229.833	201.503	180.996	0.665235	0.212478	0.00174303	0.00560289
nhr-201	WBGene00019741	UP-REGULATED	[cco-1 RNAi] and [jmjd-3.1] and [jmjd-1.2] and [jmjd-1.2 neur.]	13.5805	21.361	24.8913	50.4671	25.3914	48.2164	0.900142	0.294542	0.00224257	0.0164947	43.0345	44.108	48.7785	0.988664	0.29558	0.000823333	0.00565199	46.3209	32.7537	0.812955	0.328577	0.0133547	0.043362	42.2308	41.1766	39.5619	0.858865	0.294621	0.00355511	0.0103642
H05C05.1	WBGene00019157	UP-REGULATED	[cco-1 RNAi] and [jmjd-3.1] and [jmjd-1.2] and [jmjd-1.2 neur.]	239.356	272.353	224.629	479.438	400.917	408.421	0.766116	0.208822	0.000243741	0.0028869	325.833	520.895	385.147	0.703597	0.209255	0.000772703	0.00535616	449.8	415.377	0.770201	0.231444	0.000875344	0.00494943	335.41	298.75	450.017	0.527488	0.209181	0.0116794	0.0287062
clec-4	WBGene00012583	UP-REGULATED	[cco-1 RNAi] and [jmjd-3.1] and [jmjd-1.2]:	234.264	106.042	199.738	535.512	386.216	648.936	1.31286	0.339765	0.000111536	0.00152832	688.553	323.459	229.666	1.02015	0.340101	0.00270386	0.0146826	287.677	200.989					700.869	511.642	332.32	1.29136	0.339724	0.00014399	0.000639072
srx-2	WBGene00005893	UP-REGULATED	[cco-1 RNAi] and [jmjd-3.1] and [jmjd-1.2]:	0	1.52579	0.607105	5.60746	6.68195	6.80702	1.31066	0.467268	0.00503245	0.0305648	16.3941	6.30115	4.06488	1.64865	0.466137	0.000404956	0.00318068	3.65691	5.95522					7.30918	8.76099	6.92334	1.49867	0.465655	0.00128905	0.00430402
Y43F8B.24	WBGene00195176	UP-REGULATED	[cco-1 RNAi] and [jmjd-3.1]:	30.5561	30.5158	25.4984	71.0278	68.1558	86.7896	1.27506	0.281318	5.83013e-06	0.000137998	37.9114	22.054	20.3244					47.5398	35.7313					82.8374	68.3357	49.4524	1.11196	0.282172	8.1244e-05	0.000383912
clec-265	WBGene00019738	UP-REGULATED	[cco-1 RNAi] and [jmjd-3.1]:	463.435	360.849	519.682	956.072	787.133	1205.41	1.03526	0.270426	0.000129046	0.00172318	533.833	373.868	334.336					1025.15	486.839					1188.15	950.567	754.644	1.00939	0.270392	0.000189162	0.00080722
tir-1	WBGene00006575	UP-REGULATED	[cco-1 RNAi] and [jmjd-3.1]:	169.756	196.827	185.774	288.784	304.697	282.492	0.631868	0.183292	0.000566172	0.00560163	212.099	224.741	148.368					213.32	211.41					306.173	275.095	239.35	0.544437	0.183375	0.00298796	0.00892546
vglu-2	WBGene00010755	UP-REGULATED	[cco-1 RNAi] and [jmjd-3.1]:	220.683	209.033	231.307	362.616	374.189	313.123	0.630932	0.208106	0.00243111	0.0175668	379.114	225.791	212.39					280.363	309.671					356.526	326.785	340.233	0.598763	0.208005	0.00399448	0.0114319
cyp-14A4	WBGene00011009	UP-REGULATED	[cco-1 RNAi] and [jmjd-3.1]:	1.69756	0	4.85684	73.8315	77.5106	94.1638	1.97784	0.4742	3.03398e-05	0.000538603	7.17242	1.05019	6.09732					32.9122	0					41.4187	42.0527	26.7043	1.31071	0.474014	0.00569005	0.015535
F44G3.10	WBGene00009710	UP-REGULATED	[cco-1 RNAi] and [jmjd-3.1]:	3.39512	4.57736	9.10658	20.5607	21.3822	21.5556	1.36018	0.423275	0.0013114	0.0107434	6.14779	0	4.06488					3.65691	1.4888					15.4305	26.283	10.8795	1.14177	0.424814	0.00719451	0.0190276
cyp-13A8	WBGene00011674	UP-REGULATED	[cco-1 RNAi] and [jmjd-3.1]:	3.39512	2.28868	3.03553	34.5793	38.7553	36.8714	2.8702	0.398367	5.80844e-13	9.45525e-11	3.0739	4.20076	3.04866					9.75176	5.95522					7.30918	10.5132	6.92334	1.00556	0.421609	0.0170762	0.0397345
R106.5	WBGene00206419	UP-REGULATED	[cco-1 RNAi] and [jmjd-3.1]:	106.946	184.62	218.558	457.008	569.302	569.521	1.52651	0.227787	2.06308e-11	2.52828e-09	153.695	119.722	134.141					231.604	282.873					335.41	271.591	363.97	0.849316	0.228913	0.000207089	0.000875128
haf-3	WBGene00001813	UP-REGULATED	[cco-1 RNAi] and [jmjd-3.1]:	385.347	408.911	423.759	627.101	557.274	680.702	0.596793	0.161188	0.000213518	0.00258395	359.646	370.717	392.261					600.952	461.53					580.674	581.73	463.864	0.402677	0.161443	0.0126227	0.0307177
ccch-1	WBGene00009532	UP-REGULATED	[cco-1 RNAi] and [jmjd-3.1]:	74.6927	172.414	125.671	257.008	387.553	221.228	1.06788	0.291544	0.00024943	0.00294052	238.739	187.984	108.736					196.254	244.164					276.125	301.378	314.517	1.11131	0.291337	0.000136452	0.000610639
ZC190.4	WBGene00022538	UP-REGULATED	[cco-1 RNAi] and [jmjd-3.1]:	72.9952	76.2894	84.3876	216.822	160.367	175.281	1.06501	0.329942	0.00124712	0.0103672	99.3893	98.7179	68.0867					213.32	49.1306					266.379	167.335	166.16	1.16908	0.329582	0.000389402	0.00153305
Y4C6B.4	WBGene00021158	UP-REGULATED	[cco-1 RNAi] and [jmjd-3.1]:	16.9756	4.57736	11.535	29.9064	17.3731	24.9591	1.01962	0.359506	0.00456582	0.0282846	25.6158	16.8031	15.2433					14.6276	16.3769					24.3639	28.0352	30.6605	1.17544	0.357269	0.00100163	0.00347403
ets-4	WBGene00017687	UP-REGULATED	[cco-1 RNAi] and [jmjd-3.1]:	89.9708	90.0215	120.814	323.363	173.731	262.638	1.19608	0.289551	3.61498e-05	0.000617921	146.522	127.073	126.011					245.013	89.3283					232.269	203.255	178.029	0.914448	0.290009	0.00161507	0.00524294
K02D3.1	WBGene00010504	UP-REGULATED	[cco-1 RNAi] and [jmjd-3.1]:	8.48781	3.81447	13.9634	14.0186	38.7553	22.6901	1.12834	0.385922	0.00345844	0.0229491	21.5173	18.9034	16.2595					20.7225	19.3545					31.6731	24.5308	18.7919	1.15402	0.385263	0.0027408	0.00828929
F36A2.3	WBGene00009453	UP-REGULATED	[cco-1 RNAi] and [jmjd-3.1]:	1622.87	1232.07	1374.49	2299.06	2222.41	2683.1	0.72838	0.216655	0.000773976	0.00711515	1093.28	1275.98	1298.73					2589.09	1444.14					2261.78	2435.55	1684.35	0.562533	0.216685	0.00942923	0.0239242
nhr-3	WBGene00003602	UP-REGULATED	[cco-1 RNAi] and [jmjd-3.1]:	144.293	155.63	119.6	230.84	237.877	189.462	0.619235	0.200512	0.00201326	0.015198	132.178	108.17	131.092					207.225	159.302					194.099	231.29	168.138	0.483659	0.200832	0.0160281	0.0376003
Y97E10C.1	WBGene00022410	UP-REGULATED	[cco-1 RNAi] and [jmjd-3.1]:	86.5757	120.537	129.921	211.214	217.831	254.129	0.94442	0.217327	1.38881e-05	0.000282318	189.557	156.478	119.914					177.97	150.369					341.095	268.086	257.153	1.26818	0.216064	4.37195e-09	6.21888e-08
olrn-1	WBGene00007260	UP-REGULATED	[cco-1 RNAi] and [jmjd-3.1]:	13.5805	20.5981	20.0345	44.8597	49.4464	79.9825	1.45604	0.308346	2.33416e-06	6.32262e-05	37.9114	19.9536	21.3406					32.9122	40.1977					64.1584	56.9464	68.2443	1.54342	0.307299	5.09898e-07	4.31441e-06
K02E2.8	WBGene00010509	UP-REGULATED	[cco-1 RNAi] and [jmjd-3.1]:	95.0635	63.3202	77.7095	233.644	272.623	238.813	1.51353	0.28154	7.61974e-08	3.50878e-06	119.882	106.069	85.3625					109.707	59.5522					225.772	160.326	94.9486	0.941243	0.282899	0.000877435	0.00309243
spg-7	WBGene00004978	UP-REGULATED	[jmjd-3.1] and [jmjd-1.2 neur.]:	1329.19	1011.6	1160.79	1280.37	1311	1525.91					1291.04	1355.8	1433.89					2053.97	1396.5	0.544226	0.189886	0.00415611	0.0171598	1804.56	1728.54	1632.92	0.544809	0.170958	0.00143858	0.00473061
Y40D12A.2	WBGene00021503	UP-REGULATED	[jmjd-3.1] and [jmjd-1.2 neur.]:	573.776	472.994	614.998	742.054	856.625	878.106					1005.16	728.832	619.894					2082	1103.2	1.40297	0.261378	7.97939e-08	2.1922e-06	1779.38	1871.35	1382.69	1.49287	0.237862	3.46989e-10	6.52183e-09
madd-4	WBGene00009958	UP-REGULATED	[jmjd-3.1] and [jmjd-1.2 neur.]:	76.3903	65.6089	101.994	99.0651	124.284	114.018					217.222	102.919	94.5084					162.123	186.101	0.956263	0.320649	0.00286111	0.0128428	246.076	267.21	151.324	1.28861	0.292669	1.06772e-05	6.36295e-05
vha-6	WBGene00006915	UP-REGULATED	[jmjd-3.1] and [jmjd-1.2 neur.]:	2322.27	2247.49	2812.72	3393.45	2945.4	3861.28					2971.43	2067.83	2074.1					5019.72	2976.12	0.656518	0.234718	0.0051571	0.0203203	4728.23	5246.08	4576.33	0.927495	0.212799	1.30926e-05	7.60138e-05
C23H3.9	WBGene00016022	UP-REGULATED	[jmjd-3.1] and [jmjd-1.2 neur.]:	166.361	65.6089	202.773	345.793	188.431	313.123					314.562	114.471	143.287					443.705	276.918	1.07031	0.37789	0.00462115	0.0186552	553.873	536.172	342.211	1.44181	0.352139	4.23206e-05	0.000214983
F09A5.2	WBGene00008599	UP-REGULATED	[jmjd-3.1] and [jmjd-1.2 neur.]:	15.2781	16.7837	16.9989	13.0841	25.3914	17.5848					36.8867	28.3552	24.3893					31.6932	43.1753	1.00204	0.337001	0.00294532	0.0131559	38.9823	42.0527	41.54	1.15548	0.301668	0.000127981	0.000576122
acr-15	WBGene00000054	UP-REGULATED	[jmjd-3.1] and [jmjd-1.2 neur.]:	59.4147	54.1655	50.3897	73.8315	69.4922	63.5322					86.0691	59.8609	70.1192					84.109	102.728	0.714687	0.273337	0.00893116	0.0313938	116.947	102.504	66.2662	0.76179	0.24423	0.00181373	0.00580448
nhr-31	WBGene00003625	UP-REGULATED	[jmjd-3.1] and [jmjd-1.2 neur.]:	407.415	353.22	383.69	464.484	483.773	469.117					465.183	429.528	442.056					708.222	427.287	0.553548	0.202337	0.00622346	0.0235791	630.214	558.951	518.261	0.55889	0.181609	0.00208787	0.0065438
galt-1	WBGene00019763	UP-REGULATED	[jmjd-3.1] and [jmjd-1.2 neur.]:	32.2537	22.8868	47.3542	52.3363	77.5106	65.234					48.1577	28.3552	39.6326					103.612	46.153	0.949142	0.352109	0.00702635	0.0259858	86.898	80.6011	50.4415	0.932116	0.323256	0.00393258	0.0112799
folt-1	WBGene00007388	UP-REGULATED	[jmjd-3.1] and [jmjd-1.2 neur.]:	67.9025	18.3095	46.7471	96.2614	61.4739	98.1346					65.5764	55.6601	57.9245					119.459	56.5746	0.86943	0.359484	0.0155826	0.0488818	106.389	79.725	85.0581	0.916858	0.331106	0.00562156	0.0153823
plc-3	WBGene00004038	UP-REGULATED	[jmjd-3.1] and [jmjd-1.2 neur.]:	101.854	122.063	132.349	128.972	134.975	148.62					144.473	134.424	122.963					220.634	160.791	0.638399	0.206095	0.00195098	0.00946553	241.203	237.423	253.196	0.981315	0.181052	5.95791e-08	6.42579e-07
pcp-4	WBGene00003959	UP-REGULATED	[jmjd-3.1] and [jmjd-1.2 neur.]:	193.522	203.693	232.521	341.12	273.96	338.082					427.271	253.096	219.503					563.164	416.865	1.12945	0.252942	7.99755e-06	0.000105241	473.472	430.165	428.258	1.00949	0.229496	1.0889e-05	6.47531e-05
T25B6.2	WBGene00020788	UP-REGULATED	[jmjd-3.1] and [jmjd-1.2 neur.]:	685.815	507.324	767.381	877.567	1050.4	1005.74					841.223	1208.77	1097.52					3882.42	1735.95	1.8978	0.285425	2.95023e-11	2.14052e-09	2658.92	2644.94	1806.99	1.70707	0.261019	6.15091e-11	1.37007e-09
R193.2	WBGene00020128	UP-REGULATED	[jmjd-3.1] and [jmjd-1.2 neur.]:	2186.46	1864.51	2883.14	2992.51	3765.94	3660.48					3140.5	2334.57	2526.32					7096.85	3817.3	1.1487	0.249687	4.21311e-06	6.20599e-05	5334.08	5370.49	4853.26	1.09536	0.226976	1.39376e-06	1.05449e-05
C15C8.3	WBGene00007605	UP-REGULATED	[jmjd-3.1] and [jmjd-1.2 neur.]:	12363.3	8632.91	12415.3	15657.9	13937.2	14951.1					14219.8	13205.1	13969					28433.7	18638.3	1.01243	0.232053	1.28324e-05	0.000156599	24815.5	26160.3	16804.9	0.968399	0.210479	4.20597e-06	2.80644e-05
Y102A11A.3	WBGene00022413	UP-REGULATED	[jmjd-3.1] and [jmjd-1.2 neur.]:	426.088	286.848	280.483	232.71	343.452	211.018					356.572	296.154	336.369					880.097	378.156	0.834473	0.291843	0.00424542	0.0174428	795.076	703.507	770.469	1.09837	0.26636	3.72941e-05	0.000192489
C34H4.2	WBGene00016425	UP-REGULATED	[jmjd-3.1] and [jmjd-1.2 neur.]:	334.42	354.746	417.688	393.457	589.348	471.386					670.109	467.335	400.391					693.594	528.526	0.680371	0.237987	0.0042517	0.0174641	712.239	718.401	646.837	0.856449	0.214941	6.75975e-05	0.000324468
C17H12.6	WBGene00015932	UP-REGULATED	[jmjd-3.1] and [jmjd-1.2 neur.]:	8.48781	5.34026	12.7492	14.9532	10.6911	15.8831					6.14779	21.0038	13.2109					20.7225	26.7985	1.06259	0.40462	0.00863562	0.03055	30.861	29.7874	29.6714	1.40985	0.370033	0.000138924	0.000619383
F21F8.11	WBGene00017681	UP-REGULATED	[jmjd-3.1] and [jmjd-1.2 neur.]:	98.4586	94.5988	122.635	141.121	173.731	141.813					164.966	101.869	114.833					165.78	184.612	0.676995	0.241889	0.00512948	0.0202365	195.724	206.759	160.226	0.780847	0.216115	0.000302539	0.0012251
H20E11.1	WBGene00019213	UP-REGULATED	[jmjd-3.1] and [jmjd-1.2 neur.]:	74.6927	70.9491	132.349	140.186	112.257	123.661					159.843	87.1658	136.173					213.32	198.011	1.02378	0.279612	0.000250818	0.00178457	172.984	162.954	177.04	0.795306	0.254393	0.00177026	0.00568276
dct-17	WBGene00009431	UP-REGULATED	[jmjd-3.1] and [jmjd-1.2 neur.]:	118.829	120.537	149.348	95.3268	89.5381	69.2048					183.409	199.536	109.752					253.546	390.067	1.18752	0.264542	7.15684e-06	9.59173e-05	188.414	205.883	219.569	0.606703	0.241526	0.0120063	0.0294229
B0252.1	WBGene00015087	UP-REGULATED	[jmjd-3.1] and [jmjd-1.2 neur.]:	52.6244	38.9076	61.3176	57.0092	69.4922	60.696					58.404	57.7605	59.957					107.269	74.4402	0.758344	0.283633	0.00750249	0.0274541	117.759	84.1055	71.2115	0.775166	0.25455	0.00232497	0.00717965
cyp-13A6	WBGene00011673	UP-REGULATED	[jmjd-3.1] and [jmjd-1.2] and [jmjd-1.2 neur.]:	11.8829	3.05158	5.46395	6.54203	4.00917	12.4795					764.375	138.625	499.98	3.38578	0.456731	1.23391e-13	2.34515e-11	598.514	203.966	3.07883	0.467836	4.67272e-11	3.30026e-09	540.067	503.757	260.12	3.30789	0.456702	4.38889e-13	1.55875e-11
suro-1	WBGene00011235	UP-REGULATED	[jmjd-3.1] and [jmjd-1.2] and [jmjd-1.2 neur.]:	536.43	366.189	550.644	677.568	692.25	602.422					1481.62	898.963	944.068	1.12266	0.226863	7.47323e-07	1.83408e-05	1106.83	1156.8	1.14249	0.249687	4.74625e-06	6.83752e-05	1926.37	1419.28	1297.63	1.57721	0.22645	3.28521e-12	9.86626e-11
Y113G7B.12	WBGene00013762	UP-REGULATED	[jmjd-3.1] and [jmjd-1.2] and [jmjd-1.2 neur.]:	100.156	98.4133	83.7805	69.1586	110.92	66.3685					173.163	189.034	201.212	0.955286	0.209548	5.14485e-06	9.0617e-05	131.649	169.724	0.644057	0.235741	0.00629403	0.0237813	207.093	222.529	223.525	1.15938	0.20766	2.36324e-08	2.80769e-07
Y105C5B.15	WBGene00013654	UP-REGULATED	[jmjd-3.1] and [jmjd-1.2] and [jmjd-1.2 neur.]:	164.664	196.064	191.845	265.42	247.232	293.269					541.006	347.613	366.855	1.09075	0.248949	1.17904e-05	0.000177617	280.363	610.41	1.15855	0.273155	2.22187e-05	0.000249582	440.987	518.65	507.382	1.29981	0.248304	1.65189e-07	1.59289e-06
T28F3.5	WBGene00012131	UP-REGULATED	[jmjd-3.1] and [jmjd-1.2] and [jmjd-1.2 neur.]:	27.161	12.9692	29.1411	43.9251	42.7644	36.3041					87.0937	53.5597	67.0705	1.39755	0.310256	6.65331e-06	0.000111651	67.0434	35.7313	1.01579	0.342249	0.00299772	0.0133427	82.0252	77.0967	55.3867	1.44326	0.30853	2.89885e-06	2.00795e-05
col-156	WBGene00000729	UP-REGULATED	[jmjd-3.1] and [jmjd-1.2] and [jmjd-1.2 neur.]:	892.918	1206.9	796.522	695.325	1424.59	858.82					4006.31	2963.64	1912.53	1.4648	0.278364	1.42352e-07	4.59329e-06	2023.49	2127.5	0.987785	0.303625	0.0011407	0.00610181	3144.57	2567.85	2052.27	1.28826	0.278357	3.6909e-06	2.50269e-05
sulp-8	WBGene00013963	UP-REGULATED	[jmjd-3.1] and [jmjd-1.2] and [jmjd-1.2 neur.]:	25.4634	25.9384	36.4263	57.9437	29.4006	48.2164					67.6257	45.1582	48.7785	0.751152	0.301347	0.0126795	0.0495212	78.0141	52.1082	0.986351	0.327668	0.00261062	0.0119538	101.516	74.4684	60.3319	1.25166	0.295853	2.32977e-05	0.000126822
C36B7.5	WBGene00016468	UP-REGULATED	[jmjd-3.1] and [jmjd-1.2] and [jmjd-1.2 neur.]:	11.8829	18.3095	21.8558	23.3644	40.0917	36.3041					82.9952	39.9073	27.4379	1.19011	0.368639	0.00124485	0.0079052	32.9122	84.8619	1.34131	0.393707	0.000657094	0.00393123	59.2856	82.3533	57.3648	1.53415	0.365765	2.73637e-05	0.000146056
T01D3.6	WBGene00011330	UP-REGULATED	[jmjd-3.1] and [jmjd-1.2] and [jmjd-1.2 neur.]:	1246.01	1380.07	1509.87	1651.4	1437.95	1499.81					3000.12	2319.87	1633.07	0.710021	0.210286	0.000734266	0.00514868	2375.77	2163.23	0.67631	0.232018	0.00355803	0.0152342	2664.6	3026.92	2083.92	0.863383	0.210154	3.98506e-05	0.000204302
C29F4.2	WBGene00007808	UP-REGULATED	[jmjd-3.1] and [jmjd-1.2] and [jmjd-1.2 neur.]:	98.4586	60.2686	71.6384	67.2895	100.229	83.9533					163.941	101.869	122.963	0.733271	0.237019	0.00197664	0.0114244	175.532	190.567	1.18182	0.258979	5.03387e-06	7.19344e-05	151.056	161.202	131.543	0.913832	0.234885	0.00010002	0.000463729
Y32F6A.4	WBGene00012529	UP-REGULATED	[jmjd-3.1] and [jmjd-1.2] and [jmjd-1.2 neur.]:	493.991	308.209	473.542	599.998	542.574	585.404					610.681	668.972	630.056	0.559937	0.197494	0.00457955	0.0223575	898.381	632.742	0.809067	0.218218	0.000209229	0.00153338	691.124	799.878	655.739	0.721609	0.196957	0.000248521	0.00102826
ncx-7	WBGene00003572	UP-REGULATED	[jmjd-3.1] and [jmjd-1.2] and [jmjd-1.2 neur.]:	263.122	147.239	222.201	283.177	244.559	292.135					314.562	286.702	337.385	0.551045	0.213188	0.0097438	0.04034	453.457	326.048	0.844855	0.23499	0.00032405	0.00220293	397.944	333.794	334.298	0.725891	0.212176	0.000623497	0.00230138
T19D12.1	WBGene00020576	UP-REGULATED	[jmjd-3.1] and [jmjd-1.2] and [jmjd-1.2 neur.]:	444.761	352.457	511.183	584.11	740.36	550.802					1294.11	892.662	812.976	1.12849	0.218991	2.5615e-07	7.39609e-06	1728.5	1199.98	1.63219	0.24074	1.20253e-11	9.79327e-10	1488.64	1334.3	1400.49	1.59579	0.218502	2.80752e-13	1.04831e-11
T21C9.9	WBGene00011895	UP-REGULATED	[jmjd-3.1] and [jmjd-1.2] and [jmjd-1.2 neur.]:	315.747	289.137	211.88	309.345	469.073	304.047					835.075	522.995	380.066	1.00397	0.261834	0.00012589	0.00125238	470.523	579.145	0.863906	0.286939	0.00260588	0.0119495	610.723	692.994	560.79	1.09756	0.261513	2.70506e-05	0.000144662
ttr-14	WBGene00011460	UP-REGULATED	[jmjd-3.1] and [jmjd-1.2] and [jmjd-1.2 neur.]:	1480.27	1308.36	1273.71	1014.02	2004.58	930.293					3866.96	3423.62	1743.83	0.971617	0.346477	0.00504297	0.0240945	1445.7	5102.13	1.04096	0.371663	0.00509729	0.0201443	2335.69	3877.61	2820.77	0.971592	0.346453	0.0050411	0.0139963
T06D8.1	WBGene00011522	UP-REGULATED	[jmjd-3.1] and [jmjd-1.2] and [jmjd-1.2 neur.]:	205.405	173.177	216.737	328.036	390.226	312.556					1041.03	834.902	788.586	1.92327	0.29142	4.12062e-11	3.80517e-09	2175.86	982.611	2.62708	0.316246	9.80692e-17	2.33639e-14	2582.58	1845.94	1033.56	2.86016	0.290923	8.25084e-23	1.4683e-20
C04E12.4	WBGene00015434	UP-REGULATED	[jmjd-3.1] and [jmjd-1.2] and [jmjd-1.2 neur.]:	66.2049	91.5473	86.2089	77.5698	118.939	112.883					223.37	186.934	164.628	1.14958	0.20504	2.06313e-08	9.01548e-07	284.02	275.429	1.65677	0.223987	1.39577e-13	1.79959e-11	259.882	262.83	265.065	1.5858	0.202281	4.52133e-15	2.35616e-13
K10B2.2	WBGene00019605	UP-REGULATED	[jmjd-3.1] and [jmjd-1.2] and [jmjd-1.2 neur.]:	422.693	396.705	556.108	751.399	760.405	757.282					1111.73	663.721	723.548	0.787902	0.259659	0.00241039	0.013387	1844.3	954.324	1.45759	0.283647	2.76557e-07	6.52054e-06	1720.09	1998.38	1214.55	1.69301	0.259031	6.32143e-11	1.40059e-09
clec-160	WBGene00017322	UP-REGULATED	[jmjd-3.1] and [jmjd-1.2] and [jmjd-1.2 neur.]:	162.966	144.95	209.451	205.607	200.458	195.135					468.257	377.019	368.888	1.15897	0.213313	5.53619e-08	2.01535e-06	440.048	400.489	1.20013	0.235533	3.48087e-07	7.83876e-06	419.06	601.004	364.959	1.34044	0.212509	2.83269e-10	5.45913e-09
C40H1.8	WBGene00008043	UP-REGULATED	[jmjd-3.1] and [jmjd-1.2] and [jmjd-1.2 neur.]:	110.342	105.279	194.881	262.616	181.749	224.632					281.774	277.25	349.58	0.983554	0.320165	0.00212614	0.0120949	817.929	247.142	1.65855	0.345129	1.54301e-06	2.69764e-05	525.449	471.341	337.265	1.47025	0.319361	4.14968e-06	2.77331e-05
K10C2.1	WBGene00019617	UP-REGULATED	[jmjd-3.1] and [jmjd-1.2] and [jmjd-1.2 neur.]:	2464.86	1657.77	2843.68	2882.23	2894.62	3278.72					5813.76	3099.11	3243.77	0.737431	0.260383	0.0046243	0.0225087	6600.72	3942.36	1.07022	0.284762	0.000171065	0.0012984	5758.01	5324.93	4409.18	1.05949	0.260309	4.69854e-05	0.000236099
F54E2.1	WBGene00018823	UP-REGULATED	[jmjd-3.1] and [jmjd-1.2] and [jmjd-1.2 neur.]:	614.518	783.492	1038.15	1098.13	1030.36	1220.16					1888.4	1971.21	1118.86	0.963886	0.229009	2.56558e-05	0.000330974	2291.66	1777.63	1.22505	0.251746	1.13754e-06	2.07277e-05	1474.02	1681.23	1503.35	0.873913	0.228951	0.000135066	0.000605085
C13E3.1	WBGene00015740	UP-REGULATED	[jmjd-3.1] and [jmjd-1.2] and [jmjd-1.2 neur.]:	45.8342	35.0931	23.07	18.6915	32.0733	24.3918					92.2169	48.3088	54.8759	0.860753	0.294313	0.00344882	0.017822	67.0434	68.485	0.887506	0.322639	0.0059456	0.0227607	69.8433	77.0967	64.2881	0.964715	0.291883	0.000949271	0.00331304
K03B8.6	WBGene00010524	UP-REGULATED	[jmjd-3.1] and [jmjd-1.2] and [jmjd-1.2 neur.]:	225.776	252.518	386.119	434.578	340.779	440.188					627.075	549.25	382.099	0.783631	0.24069	0.00113084	0.00732603	772.827	530.015	1.07438	0.264077	4.73289e-05	0.00046234	551.437	505.509	437.159	0.727378	0.240473	0.00248818	0.00760085
fbxa-60	WBGene00020456	UP-REGULATED	[jmjd-3.1] and [jmjd-1.2] and [jmjd-1.2 neur.]:	120.527	105.279	110.493	132.71	125.621	114.018					199.803	208.988	173.774	0.775888	0.173028	7.31975e-06	0.000120756	160.904	160.791	0.510255	0.19736	0.00972652	0.0336268	146.184	165.583	168.138	0.503803	0.173442	0.00367564	0.010671
F59E11.5	WBGene00019111	UP-REGULATED	[jmjd-3.1] and [jmjd-1.2] and [jmjd-1.2 neur.]:	178.244	174.703	226.45	202.803	257.923	263.205					462.109	344.463	330.271	0.919992	0.201543	5.00135e-06	8.87591e-05	369.348	393.044	0.918474	0.223407	3.93588e-05	0.000398633	287.494	339.05	245.284	0.555017	0.201993	0.00600125	0.0162336
mpz-1	WBGene00003404	UP-REGULATED	[jmjd-3.1] and [jmjd-1.2] and [jmjd-1.2 neur.]:	241.054	186.146	190.631	179.439	200.458	152.024					448.789	249.945	276.412	0.628402	0.221654	0.00458166	0.0223611	550.975	436.22	1.18483	0.243096	1.09403e-06	2.01418e-05	713.863	714.021	722.994	1.70949	0.21932	6.4665e-15	3.308e-13
glt-5	WBGene00001623	UP-REGULATED	[jmjd-3.1] and [jmjd-1.2] and [jmjd-1.2 neur.]:	5.09269	12.9692	16.9989	24.299	28.0642	26.6608					42.0099	23.1042	24.3893	1.00196	0.360537	0.00545132	0.025604	35.3501	32.7537	1.14457	0.387127	0.00311082	0.0137358	54.4128	64.8313	25.7153	1.60966	0.353379	5.23742e-06	3.41566e-05
fkb-4	WBGene00001429	UP-REGULATED	[jmjd-3.1] and [jmjd-1.2] and [jmjd-1.2 neur.]:	227.473	110.62	163.918	157.009	96.22	153.725					441.616	261.498	315.028	0.934923	0.279897	0.000837066	0.00572223	358.377	279.895	0.839458	0.30588	0.00606206	0.0231268	473.472	347.811	274.955	1.0331	0.279402	0.000217694	0.000914282
C02B8.3	WBGene00015322	UP-REGULATED	[jmjd-3.1] and [jmjd-1.2] and [jmjd-1.2 neur.]:	8.48781	6.10315	18.2132	25.2336	17.3731	27.7954					54.3055	19.9536	23.3731	1.17698	0.386179	0.00230559	0.0129191	40.226	20.8433	1.08594	0.412832	0.00852706	0.0302801	39.7944	29.7874	32.6386	1.23442	0.384163	0.00131237	0.0043723
clec-66	WBGene00009397	UP-REGULATED	[jmjd-3.1] and [jmjd-1.2]:	407.415	402.045	490.541	590.652	439.672	517.334					1172.18	824.4	623.959	0.946543	0.230857	4.12931e-05	0.00049122	655.806	465.996					953.442	991.744	737.83	0.978908	0.230643	2.19324e-05	0.00012029
pes-8	WBGene00003981	UP-REGULATED	[jmjd-3.1] and [jmjd-1.2]:	712.976	656.852	911.265	1203.73	1050.4	1002.9					1553.34	1265.48	859.722	0.649777	0.218217	0.00290456	0.0155401	947.14	1156.8					1189.77	1302.76	965.311	0.565635	0.218129	0.00951106	0.0241099
W07A12.4	WBGene00012322	UP-REGULATED	[jmjd-3.1] and [jmjd-1.2]:	8.48781	5.34026	7.89237	20.5607	21.3822	10.7778					28.6897	19.9536	16.2595	1.26266	0.379179	0.000868494	0.00589516	17.0656	8.93283					18.679	21.9025	22.7481	1.2333	0.376792	0.00106356	0.00365699
C07A9.9	WBGene00007405	UP-REGULATED	[jmjd-3.1] and [jmjd-1.2]:	69.6001	57.9799	50.9968	42.9905	57.4647	48.2164					195.705	178.532	165.644	1.52293	0.234186	7.86977e-11	6.77007e-09	58.5106	95.2835					116.135	111.265	78.1348	0.750268	0.237427	0.00157772	0.00513866
dct-5	WBGene00017218	UP-REGULATED	[jmjd-3.1] and [jmjd-1.2]:	120.527	144.187	123.242	103.738	216.495	114.018					425.222	187.984	169.709	0.889478	0.310944	0.00422873	0.0210151	140.182	215.877					227.397	240.927	212.645	0.711429	0.310889	0.0221158	0.0494523
F25A2.1	WBGene00017764	UP-REGULATED	[jmjd-3.1]:	13.5805	11.4434	7.28526	19.6261	9.35472	14.7486					10.2463	14.7027	18.292					3.65691	10.4216					25.1761	27.1591	28.6824	1.16635	0.363459	0.00133182	0.00443005
ugt-50	WBGene00011564	UP-REGULATED	[jmjd-3.1]:	853.874	495.118	791.665	1042.05	1015.66	1128.26					1362.76	507.242	753.019					1160.46	984.1					1369.25	1461.33	1323.35	0.87199	0.273308	0.00142028	0.00468145
C06E8.5	WBGene00015544	UP-REGULATED	[jmjd-3.1]:	71.2976	93.073	90.4587	76.6353	179.076	85.0878					259.232	101.869	107.719					110.926	199.5					177.857	215.52	210.667	1.06112	0.332969	0.00143839	0.00473061
lys-2	WBGene00003091	UP-REGULATED	[jmjd-3.1]:	2115.16	1649.38	2027.73	2228.03	1647.77	2540.72					3058.53	1565.83	1273.32					2180.74	1432.23					4227.14	3991.51	3069.02	0.876151	0.275691	0.00148287	0.00486192
acr-12	WBGene00000051	UP-REGULATED	[jmjd-3.1]:	18.6732	23.6497	23.07	36.4485	32.0733	30.6316					33.8128	36.7567	30.4866					24.3794	34.2425					37.358	45.5571	43.5181	0.833153	0.274487	0.00240289	0.00737598
T28C12.2	WBGene00020889	UP-REGULATED	[jmjd-3.1]:	23.7659	22.8868	32.1766	38.3176	26.7278	28.9299					15.3695	18.9034	21.3406					35.3501	43.1753					52.7885	75.3445	28.6824	0.857928	0.321006	0.00752607	0.0198293
K07G5.5	WBGene00010644	UP-REGULATED	[jmjd-3.1]:	202.01	103.754	152.383	128.972	133.639	141.813					164.966	96.6176	130.076					270.611	200.989					261.506	273.343	193.853	0.637579	0.250019	0.0107685	0.0267779
srx-115	WBGene00006006	UP-REGULATED	[jmjd-3.1]:	1.69756	1.52579	0	4.67288	0	1.70176					2.04926	2.10038	2.03244					2.43794	8.93283					6.49705	6.13269	4.94524	1.18648	0.476605	0.0127948	0.0310866
C39D10.11	WBGene00043983	UP-REGULATED	[jmjd-3.1]:	129.015	102.228	114.743	142.056	138.984	140.111					138.325	136.525	121.946					162.123	138.459					151.056	155.946	156.27	0.42256	0.171664	0.0138337	0.0332121
pqn-25	WBGene00004114	UP-REGULATED	[jmjd-3.1]:	40.7415	51.8768	48.5684	68.2241	84.1925	66.9357					74.7981	53.5597	38.6163					58.5106	68.485					101.516	104.256	79.1239	0.923469	0.249677	0.000216743	0.000910747
klo-1	WBGene00016848	UP-REGULATED	[jmjd-3.1]:	629.796	312.786	384.905	534.578	424.972	478.761					478.503	398.022	407.504					919.104	521.082					820.252	883.108	736.841	0.823615	0.247019	0.000855392	0.00303157
C05D11.5	WBGene00015483	UP-REGULATED	[jmjd-3.1]:	62.8098	53.4026	55.2466	59.8129	62.8103	50.4854					60.4533	55.6601	50.811					75.5762	62.5298					87.7102	84.9816	72.2005	0.506021	0.217135	0.0197828	0.0450486
Y69A2AR.12	WBGene00022083	UP-REGULATED	[jmjd-3.1]:	44.1366	60.2686	29.1411	26.1681	60.1375	36.8714					14.3448	11.5521	12.1946	-1.48121	0.338933	1.24129e-05	0.000185456	13.4087	17.8657	-1.14838	0.367522	0.0017801	0.00878258	151.869	141.928	209.678	1.73815	0.303615	1.03524e-08	1.35292e-07
nspe-1	WBGene00012591	UP-REGULATED	[jmjd-3.1]:	57.7171	206.744	117.778	152.336	247.232	196.269					162.916	115.521	154.465					245.013	132.504					430.429	418.775	196.821	1.22801	0.340162	0.000306117	0.00123719
Y51H4A.25	WBGene00013119	UP-REGULATED	[jmjd-3.1]:	27.161	10.6805	17.6061	14.9532	20.0458	26.0936					31.7636	27.305	30.4866					40.226	28.2873					43.0429	39.4244	30.6605	0.971603	0.320281	0.0024166	0.00741334
hrg-3	WBGene00010256	UP-REGULATED	[jmjd-3.1]:	106.946	89.2586	66.1745	85.981	94.8836	100.404					64.5518	87.1658	67.0705					138.963	50.6194					169.735	183.981	127.587	0.81074	0.282674	0.00412938	0.0117737
F48G7.5	WBGene00018616	UP-REGULATED	[jmjd-3.1]:	101.854	116.723	85.6018	78.5044	205.804	106.076					257.183	176.432	82.3138					173.094	144.414					207.093	256.697	183.963	0.941015	0.329383	0.00427798	0.0121456
clec-42	WBGene00008891	UP-REGULATED	[jmjd-3.1]:	1.69756	0	1.21421	7.47661	1.33639	4.53802					11.2709	2.10038	4.06488					7.31382	4.46641					7.30918	9.63709	3.95619	1.30068	0.47474	0.00614825	0.0165723
F28F5.6	WBGene00017905	UP-REGULATED	[jmjd-3.1]:	218.986	164.022	194.274	214.953	177.74	195.135					368.867	180.633	220.52					245.013	290.317					315.919	290.865	293.747	0.607669	0.231909	0.0087856	0.0225407
scav-5	WBGene00011076	UP-REGULATED	[jmjd-3.1]:	100.156	69.4233	95.9226	142.99	53.4556	89.6258					171.114	137.575	136.173					170.656	120.593					166.487	174.344	116.708	0.716026	0.282874	0.0113654	0.0280619
F29C6.1	WBGene00009243	UP-REGULATED	[jmjd-3.1]:	298.771	218.188	258.627	259.812	302.024	277.386					233.616	186.934	230.682					335.217	315.627					396.32	420.527	278.912	0.487085	0.193459	0.0118101	0.0289847
Y69A2AR.25	WBGene00022096	UP-REGULATED	[jmjd-3.1]:	5.09269	12.9692	5.46395	5.60746	8.01833	7.37428					1.02463	3.15057	4.06488					2.43794	4.46641					14.6184	16.6459	30.6605	1.05781	0.423198	0.0124348	0.0303264
nhr-206	WBGene00011097	UP-REGULATED	[jmjd-3.1]:	10.1854	10.6805	12.1421	15.8878	16.0367	18.1521					22.5419	14.7027	21.3406					13.4087	16.3769					38.9823	22.7786	22.7481	1.13812	0.344033	0.000939099	0.00328439
F58E6.8	WBGene00010257	UP-REGULATED	[jmjd-3.1]:	5.09269	0.762894	4.24974	8.41119	5.34556	20.4211					8.19705	1.05019	6.09732					3.65691	1.4888					17.8669	14.0176	15.8248	1.48527	0.457192	0.00115941	0.00394199
T08G11.3	WBGene00011630	UP-REGULATED	[jmjd-3.1]:	1.69756	7.62894	0.607105	7.47661	8.01833	6.80702					11.2709	11.5521	11.1784					13.4087	5.95522					17.8669	9.63709	10.8795	1.24543	0.441808	0.00481834	0.0134604
B0222.11	WBGene00044582	UP-REGULATED	[jmjd-3.1]:	20.3707	12.2063	28.5339	36.4485	16.0367	25.5263					28.6897	12.6023	28.4542					25.5984	41.6865					44.6672	41.1766	43.5181	0.904281	0.347233	0.00920756	0.0234604
T10H10.2	WBGene00020426	UP-REGULATED	[jmjd-3.1]:	101.854	48.8252	128.706	210.28	124.284	207.614					161.892	58.8107	98.5733					206.006	139.948					215.215	193.618	144.401	0.846821	0.331925	0.010734	0.0267
Y39G8B.10	WBGene00012729	UP-REGULATED	[jmjd-3.1]:	8.48781	12.2063	9.10658	11.2149	18.7094	17.0176					21.5173	27.305	19.3082					37.7881	10.4216					38.9823	28.9113	8.90143	1.01264	0.408447	0.0131658	0.031828
abu-12	WBGene00004127	UP-REGULATED	[jmjd-3.1]:	1006.65	624.81	975.618	1031.77	726.996	779.972					1604.57	1175.16	928.825					1535.9	1092.78					1529.24	1296.63	1154.22	0.56993	0.241581	0.0183162	0.0421914

## Sheet: CBP-1- & ATFS-1- dependent(87)
Gene	Wormbase Identifier	Direction	DEG overlap	EV1	EV2	EV3	cco-1_1	cco-1_2	cco-1_3	Log2 FC	lfcSE	pval	padj	sur-5::jmjd-1.2	sur-5::jmjd-1.2	sur-5::jmjd-1.2	Log2 FC	lfcSE	pval	padj	rgef-1::jmjd-1.2	rgef-1::jmjd-1.2	Log2 FC	lfcSE	pval	padj	jmjd-3.1::jmjd-3.1	jmjd-3.1::jmjd-3.1	jmjd-3.1::jmjd-3.1	Log2 FC	lfcSE	pval	padj
ZK370.8	WBGene00022722	UP-REGULATED	[cco-1 RNAi] and [jmjd-3.1] and [jmjd-1.2 neur.]:	673.932	588.954	760.703	1207.47	1045.06	1169.67	0.722689	0.200742	0.00031812	0.00357027	770.523	783.442	832.284					1676.08	978.145	0.922935	0.221794	3.16549e-05	0.000336402	1344.08	1331.67	1019.71	0.828274	0.200599	3.64338e-05	0.00018863
hsp-6	WBGene00002010	UP-REGULATED	[cco-1 RNAi] and [jmjd-3.1] and [jmjd-1.2 neur.]:	2451.28	3573.39	3607.42	6539.23	6240.94	7559.2	1.01946	0.215937	2.34555e-06	6.32698e-05	3516.54	2750.45	2843.38					6851.83	3954.27	0.703851	0.238006	0.00310369	0.0137119	6546.59	5647.33	5422.95	0.823024	0.215952	0.000138326	0.00061787
F18A12.4	WBGene00017553	UP-REGULATED	[cco-1 RNAi] and [jmjd-3.1] and [jmjd-1.2 neur.]:	61.1122	88.4957	60.1034	136.448	148.339	132.737	0.8791	0.286309	0.0021373	0.0158741	86.0691	89.2662	116.865					277.925	102.728	1.27705	0.311462	4.12867e-05	0.000414216	269.628	330.289	235.393	1.79284	0.28363	2.59759e-10	5.0585e-09
F27D9.2	WBGene00017861	UP-REGULATED	[cco-1 RNAi] and [jmjd-3.1] and [jmjd-1.2 neur.]:	91.6684	64.0831	85.6018	208.411	144.33	200.807	1.15172	0.217594	1.20333e-07	5.13647e-06	121.931	97.6678	98.5733					166.999	144.414	0.9073	0.243906	0.000199319	0.00147566	198.972	223.405	167.149	1.23128	0.216982	1.3905e-08	1.76482e-07
H28G03.1	WBGene00019249	UP-REGULATED	[cco-1 RNAi] and [jmjd-3.1] and [jmjd-1.2 neur.]:	203.707	336.436	275.019	809.343	692.25	920.083	1.46691	0.229399	1.61006e-10	1.45634e-08	378.089	369.667	304.866					780.141	437.709	1.07692	0.253242	2.11386e-05	0.000239641	785.331	714.021	636.947	1.29534	0.229492	1.65779e-08	2.06643e-07
sur-5	WBGene00006351	UP-REGULATED	[cco-1 RNAi] and [jmjd-3.1] and [jmjd-1.2 neur.]:	420.995	405.097	409.796	721.493	698.931	723.814	0.768161	0.17446	1.06729e-05	0.000229985	491.823	539.798	594.489					1270.17	814.376	1.28539	0.192853	2.6441e-11	1.98146e-09	769.9	889.24	750.688	0.930779	0.174113	9.00045e-08	9.2709e-07
clu-1	WBGene00000550	UP-REGULATED	[cco-1 RNAi] and [jmjd-3.1] and [jmjd-1.2 neur.]:	881.035	644.645	799.558	1516.82	1435.28	1443.09	0.870324	0.2157	5.46293e-05	0.000857389	857.617	1068.04	1263.16					1928.41	1051.1	0.888074	0.237902	0.000189263	0.00140906	1821.61	1686.49	1804.02	1.12934	0.215524	1.60608e-07	1.55388e-06
pde-3	WBGene00008443	UP-REGULATED	[cco-1 RNAi] and [jmjd-3.1] and [jmjd-1.2 neur.]:	37.3464	55.6913	55.2466	119.626	106.911	137.842	1.19067	0.225078	1.22281e-07	5.19046e-06	56.3547	47.2586	50.811					109.707	95.2835	0.940671	0.253884	0.000211286	0.00154633	140.499	119.149	99.8939	1.16543	0.224908	2.19739e-07	2.03871e-06
clec-17	WBGene00008477	UP-REGULATED	[cco-1 RNAi] and [jmjd-3.1] and [jmjd-1.2 neur.]:	0	1.52579	0.607105	17.757	6.68195	24.9591	2.0157	0.467915	1.6487e-05	0.000323274	10.2463	1.05019	2.03244					15.8466	2.97761	1.41667	0.477346	0.00299929	0.013343	25.1761	18.3981	12.8576	2.13058	0.467344	5.14212e-06	3.35866e-05
F34H10.3	WBGene00009380	UP-REGULATED	[cco-1 RNAi] and [jmjd-3.1] and [jmjd-1.2 neur.]:	62.8098	65.6089	77.1024	236.448	155.021	204.211	1.41762	0.246922	9.40315e-09	5.43309e-07	136.276	113.421	69.1029					145.057	107.194	0.804011	0.276549	0.00364566	0.0155552	154.305	171.715	151.324	1.11392	0.247819	6.96097e-06	4.37263e-05
cyp-14A1	WBGene00010705	UP-REGULATED	[cco-1 RNAi] and [jmjd-3.1] and [jmjd-1.2 neur.]:	15.2781	13.7321	18.2132	54.2054	56.1283	77.7135	1.67208	0.343212	1.10548e-06	3.43535e-05	26.6404	10.5019	31.5028					68.2623	29.7761	1.33508	0.374022	0.000357617	0.0023884	61.722	65.7074	41.54	1.52993	0.343703	8.53514e-06	5.21841e-05
C46C2.2	WBGene00008110	UP-REGULATED	[cco-1 RNAi] and [jmjd-3.1] and [jmjd-1.2 neur.]:	387.044	421.117	502.683	1240.18	991.601	1207.11	1.27112	0.266599	1.86143e-06	5.21886e-05	629.124	497.79	422.747					1232.38	495.772	0.888931	0.291849	0.00232018	0.0108958	1141.04	954.948	762.556	1.02604	0.266692	0.000119425	0.000541833
cpna-1	WBGene00006495	UP-REGULATED	[cco-1 RNAi] and [jmjd-3.1] and [jmjd-1.2 neur.]:	448.156	402.045	340.586	732.708	566.629	703.96	0.722608	0.199447	0.000291141	0.00331151	573.794	374.918	384.131					864.25	669.962	0.903936	0.220599	4.17391e-05	0.000416921	715.487	671.968	661.673	0.75218	0.199301	0.000160592	0.000701588
cyp-13A12	WBGene00008810	UP-REGULATED	[cco-1 RNAi] and [jmjd-3.1] and [jmjd-1.2 neur.]:	13.5805	5.34026	14.5705	85.981	82.8561	107.778	2.38024	0.395079	1.69388e-09	1.19168e-07	21.5173	8.40153	28.4542					52.4157	11.9104	1.14114	0.424956	0.00724633	0.0266511	55.2249	45.5571	25.7153	1.44608	0.398284	0.000282565	0.00115371
DC2.5	WBGene00017082	UP-REGULATED	[cco-1 RNAi] and [jmjd-3.1] and [jmjd-1.2 neur.]:	202.01	157.919	203.38	545.793	529.21	613.199	1.47227	0.248851	3.29334e-09	2.14788e-07	163.941	134.424	221.536					410.793	224.81	0.702812	0.275273	0.0106756	0.0362177	440.987	388.988	270.01	0.89664	0.249589	0.000327563	0.00131235
pcp-2	WBGene00003957	UP-REGULATED	[cco-1 RNAi] and [jmjd-3.1] and [jmjd-1.2 neur.]:	263.122	203.693	390.369	487.849	379.534	538.889	0.656788	0.254125	0.00975179	0.0497777	564.572	357.065	315.028					709.441	716.115	1.19357	0.277996	1.75898e-05	0.000204642	618.032	479.226	497.491	0.822649	0.253815	0.00119054	0.00403065
emb-8	WBGene00001262	UP-REGULATED	[cco-1 RNAi] and [jmjd-3.1] and [jmjd-1.2 neur.]:	1531.2	1354.9	1875.35	2248.59	2458.96	2656.44	0.608897	0.165899	0.000242276	0.00288077	1898.64	1732.81	1726.56					2658.57	2268.94	0.610507	0.184194	0.00091813	0.0051348	2239.86	2682.61	2045.35	0.531411	0.165897	0.0013588	0.00450636
sprr-2	WBGene00009629	UP-REGULATED	[cco-1 RNAi] and [jmjd-3.1] and [jmjd-1.2 neur.]:	6.79025	8.39183	13.3563	26.1681	29.4006	26.6608	1.19216	0.327173	0.000268623	0.00311365	27.6651	16.8031	14.2271					34.1312	43.1753	1.60463	0.352588	5.33885e-06	7.54147e-05	54.4128	50.8137	47.4743	2.01426	0.317591	2.26326e-10	4.48045e-09
T15B7.10	WBGene00020522	UP-REGULATED	[cco-1 RNAi] and [jmjd-3.1] and [jmjd-1.2 neur.]:	0	0.762894	1.82132	11.2149	9.35472	5.67252	1.46387	0.468384	0.0017758	0.0137226	3.0739	3.15057	3.04866					8.53279	7.44402	1.31856	0.477456	0.00575112	0.0221363	16.2426	2.6283	12.8576	1.68787	0.466888	0.000300165	0.00121696
adt-1	WBGene00000082	UP-REGULATED	[cco-1 RNAi] and [jmjd-3.1] and [jmjd-1.2] and [jmjd-1.2 neur.]	71.2976	57.9799	35.8192	113.084	114.929	89.6258	0.889204	0.252043	0.000418745	0.00443434	340.178	273.05	205.276	2.17078	0.247252	1.64033e-18	9.93007e-16	208.444	247.142	1.9113	0.271744	2.01477e-12	1.96096e-10	430.429	347.811	368.915	2.63038	0.245719	9.66122e-27	2.56528e-24
ugt-2	WBGene00007073	UP-REGULATED	[cco-1 RNAi] and [jmjd-3.1] and [jmjd-1.2] and [jmjd-1.2 neur.]	47.5317	44.2478	40.0689	160.747	223.177	256.398	2.09273	0.257874	4.84562e-16	1.38932e-13	153.695	111.32	143.287	1.48668	0.260817	1.19758e-08	5.70684e-07	296.21	180.145	2.22032	0.281535	3.1082e-15	5.97748e-13	283.434	313.643	206.711	2.39818	0.256857	9.9436e-21	1.35233e-18
ugt-62	WBGene00010904	UP-REGULATED	[cco-1 RNAi] and [jmjd-3.1] and [jmjd-1.2] and [jmjd-1.2 neur.]	560.196	630.913	893.052	4822.41	3798.02	4978.77	2.46209	0.267827	3.82532e-20	2.15295e-17	4501.21	2621.28	2915.53	2.06018	0.267913	1.47408e-14	3.39349e-12	4250.55	2124.52	1.98833	0.292596	1.0794e-11	8.88114e-10	4781.02	5347.71	3662.45	2.48055	0.267813	2.00222e-20	2.53736e-18
ugt-19	WBGene00019515	UP-REGULATED	[cco-1 RNAi] and [jmjd-3.1] and [jmjd-1.2] and [jmjd-1.2 neur.]	108.644	64.846	127.492	518.69	538.565	694.317	2.31378	0.271252	1.46309e-17	6.00896e-15	226.444	180.633	231.698	0.978572	0.273888	0.000353071	0.00284895	385.195	209.921	1.41764	0.298086	1.97635e-06	3.31023e-05	462.103	537.049	323.419	1.93983	0.271594	9.17402e-13	3.06313e-11
ugt-12	WBGene00020592	UP-REGULATED	[cco-1 RNAi] and [jmjd-3.1] and [jmjd-1.2] and [jmjd-1.2 neur.]	303.864	521.819	550.037	983.174	1150.63	1116.35	1.13165	0.258873	1.23427e-05	0.000257637	1137.34	1163.61	1071.1	1.18066	0.258918	5.11623e-06	9.021e-05	2257.53	1122.56	1.70339	0.282986	1.75131e-09	8.22188e-08	1868.71	2125.42	1316.42	1.78552	0.25854	4.97935e-12	1.42682e-10
apy-1	WBGene00017244	UP-REGULATED	[cco-1 RNAi] and [jmjd-3.1] and [jmjd-1.2] and [jmjd-1.2 neur.]	840.293	655.326	970.761	1457.94	1420.58	1745.43	0.848878	0.23131	0.000242679	0.0028833	2178.37	1258.13	1677.78	0.984758	0.231305	2.06823e-05	0.000277775	2420.88	1935.45	1.30494	0.254142	2.82619e-07	6.62432e-06	2719.01	2694	1776.33	1.44627	0.231045	3.85738e-10	7.18555e-09
pgp-9	WBGene00004003	UP-REGULATED	[cco-1 RNAi] and [jmjd-3.1] and [jmjd-1.2] and [jmjd-1.2 neur.]	145.99	161.733	216.737	455.139	578.656	718.141	1.58278	0.266102	2.71399e-09	1.78536e-07	412.927	286.702	237.795	0.753996	0.267523	0.00482588	0.023275	670.434	336.47	1.37363	0.291405	2.4311e-06	3.96377e-05	622.905	632.543	537.053	1.61226	0.265991	1.34987e-09	2.20729e-08
cyp-33E2	WBGene00018334	UP-REGULATED	[cco-1 RNAi] and [jmjd-3.1] and [jmjd-1.2] and [jmjd-1.2 neur.]	44.1366	42.7221	56.4608	91.5885	84.1925	121.959	0.963421	0.253049	0.000140516	0.00185033	160.867	115.521	142.271	1.40903	0.251334	2.0684e-08	9.01548e-07	177.97	123.571	1.50128	0.275654	5.14429e-08	1.52627e-06	155.929	161.202	106.817	1.42853	0.250204	1.13321e-08	1.47406e-07
K09E9.1	WBGene00010724	UP-REGULATED	[cco-1 RNAi] and [jmjd-3.1] and [jmjd-1.2] and [jmjd-1.2 neur.]	66.2049	56.4541	69.21	250.466	175.067	254.129	1.65759	0.27447	1.54825e-09	1.10457e-07	108.611	143.876	110.768	0.826328	0.277961	0.00295081	0.0157456	275.487	113.149	1.43989	0.301087	1.73298e-06	2.97439e-05	210.342	241.803	176.051	1.54945	0.27456	1.66737e-08	2.07528e-07
F25B3.5	WBGene00009102	UP-REGULATED	[cco-1 RNAi] and [jmjd-3.1] and [jmjd-1.2] and [jmjd-1.2 neur.]	13.5805	28.99	24.2842	51.4017	85.5289	80.5498	1.45955	0.281175	2.09289e-07	8.3474e-06	82.9952	53.5597	57.9245	1.31255	0.283776	3.74062e-06	6.97155e-05	45.1019	44.6641	0.84002	0.318915	0.00843878	0.030025	78.7767	75.3445	68.2443	1.49315	0.280552	1.02525e-07	1.04328e-06
cyp-13A5	WBGene00011672	UP-REGULATED	[cco-1 RNAi] and [jmjd-3.1] and [jmjd-1.2] and [jmjd-1.2 neur.]	8.48781	3.05158	6.07105	27.1027	13.3639	24.3918	1.40343	0.395248	0.000384145	0.00415183	56.3547	42.0076	43.6974	2.32626	0.389354	2.30553e-09	1.30847e-07	26.8173	26.7985	1.61808	0.419832	0.000116149	0.000956644	42.2308	53.442	13.8467	2.01571	0.390004	2.36071e-07	2.17936e-06
hrg-1	WBGene00019830	UP-REGULATED	[cco-1 RNAi] and [jmjd-3.1] and [jmjd-1.2] and [jmjd-1.2 neur.]	468.527	711.78	487.505	1230.84	1368.46	1363.11	1.16504	0.234685	6.89573e-07	2.29797e-05	910.898	993.481	832.284	0.664872	0.235131	0.00468893	0.022742	1281.14	668.473	0.755009	0.258504	0.00349259	0.0150388	1352.2	1372.85	978.169	1.07382	0.23469	4.75131e-06	3.12913e-05
ZK1290.14	WBGene00044396	UP-REGULATED	[cco-1 RNAi] and [jmjd-3.1] and [jmjd-1.2] and [jmjd-1.2 neur.]	56.0196	56.4541	50.3897	89.7193	85.5289	87.3568	0.646559	0.238557	0.00672246	0.0375752	110.66	113.421	104.671	0.949973	0.237466	6.32197e-05	0.000701987	108.488	87.8395	0.798982	0.265188	0.0025877	0.0118863	133.189	94.6187	70.2224	0.823149	0.236871	0.000510673	0.00193212
twk-7	WBGene00006662	UP-REGULATED	[cco-1 RNAi] and [jmjd-3.1] and [jmjd-1.2] and [jmjd-1.2 neur.]	23.7659	24.4126	14.5705	65.4203	56.1283	57.8597	1.33373	0.312927	2.02503e-05	0.000384194	66.6011	45.1582	29.4704	1.02543	0.316855	0.00121105	0.00772625	63.3865	75.929	1.5045	0.340063	9.68058e-06	0.000124313	108.826	94.6187	58.3538	1.82925	0.309524	3.42332e-09	5.00571e-08
cyp-33C9	WBGene00016860	UP-REGULATED	[cco-1 RNAi] and [jmjd-3.1] and [jmjd-1.2] and [jmjd-1.2 neur.]	113.737	105.279	139.027	216.822	181.749	207.614	0.699151	0.247029	0.00465134	0.0286741	236.69	169.081	183.936	0.660229	0.247653	0.00767734	0.033463	362.034	221.832	1.18049	0.27044	1.27082e-05	0.000155321	321.604	440.678	246.273	1.38309	0.245061	1.6629e-08	2.07125e-07
Y47D7A.16	WBGene00044637	UP-REGULATED	[cco-1 RNAi] and [jmjd-3.1] and [jmjd-1.2] and [jmjd-1.2 neur.]	71.2976	103.754	123.849	238.317	236.541	243.918	1.17405	0.191478	8.70613e-10	6.71565e-08	146.522	163.83	156.498	0.574903	0.195501	0.00327511	0.0171466	238.918	214.388	1.08989	0.21421	3.61993e-07	8.10397e-06	226.585	201.503	181.985	0.947085	0.19221	8.33513e-07	6.67697e-06
clec-4	WBGene00012583	UP-REGULATED	[cco-1 RNAi] and [jmjd-3.1] and [jmjd-1.2]:	234.264	106.042	199.738	535.512	386.216	648.936	1.31286	0.339765	0.000111536	0.00152832	688.553	323.459	229.666	1.02015	0.340101	0.00270386	0.0146826	287.677	200.989					700.869	511.642	332.32	1.29136	0.339724	0.00014399	0.000639072
srx-2	WBGene00005893	UP-REGULATED	[cco-1 RNAi] and [jmjd-3.1] and [jmjd-1.2]:	0	1.52579	0.607105	5.60746	6.68195	6.80702	1.31066	0.467268	0.00503245	0.0305648	16.3941	6.30115	4.06488	1.64865	0.466137	0.000404956	0.00318068	3.65691	5.95522					7.30918	8.76099	6.92334	1.49867	0.465655	0.00128905	0.00430402
Y43F8B.24	WBGene00195176	UP-REGULATED	[cco-1 RNAi] and [jmjd-3.1]:	30.5561	30.5158	25.4984	71.0278	68.1558	86.7896	1.27506	0.281318	5.83013e-06	0.000137998	37.9114	22.054	20.3244					47.5398	35.7313					82.8374	68.3357	49.4524	1.11196	0.282172	8.1244e-05	0.000383912
clec-265	WBGene00019738	UP-REGULATED	[cco-1 RNAi] and [jmjd-3.1]:	463.435	360.849	519.682	956.072	787.133	1205.41	1.03526	0.270426	0.000129046	0.00172318	533.833	373.868	334.336					1025.15	486.839					1188.15	950.567	754.644	1.00939	0.270392	0.000189162	0.00080722
tir-1	WBGene00006575	UP-REGULATED	[cco-1 RNAi] and [jmjd-3.1]:	169.756	196.827	185.774	288.784	304.697	282.492	0.631868	0.183292	0.000566172	0.00560163	212.099	224.741	148.368					213.32	211.41					306.173	275.095	239.35	0.544437	0.183375	0.00298796	0.00892546
vglu-2	WBGene00010755	UP-REGULATED	[cco-1 RNAi] and [jmjd-3.1]:	220.683	209.033	231.307	362.616	374.189	313.123	0.630932	0.208106	0.00243111	0.0175668	379.114	225.791	212.39					280.363	309.671					356.526	326.785	340.233	0.598763	0.208005	0.00399448	0.0114319
cyp-14A4	WBGene00011009	UP-REGULATED	[cco-1 RNAi] and [jmjd-3.1]:	1.69756	0	4.85684	73.8315	77.5106	94.1638	1.97784	0.4742	3.03398e-05	0.000538603	7.17242	1.05019	6.09732					32.9122	0					41.4187	42.0527	26.7043	1.31071	0.474014	0.00569005	0.015535
F44G3.10	WBGene00009710	UP-REGULATED	[cco-1 RNAi] and [jmjd-3.1]:	3.39512	4.57736	9.10658	20.5607	21.3822	21.5556	1.36018	0.423275	0.0013114	0.0107434	6.14779	0	4.06488					3.65691	1.4888					15.4305	26.283	10.8795	1.14177	0.424814	0.00719451	0.0190276
cyp-13A8	WBGene00011674	UP-REGULATED	[cco-1 RNAi] and [jmjd-3.1]:	3.39512	2.28868	3.03553	34.5793	38.7553	36.8714	2.8702	0.398367	5.80844e-13	9.45525e-11	3.0739	4.20076	3.04866					9.75176	5.95522					7.30918	10.5132	6.92334	1.00556	0.421609	0.0170762	0.0397345
R106.5	WBGene00206419	UP-REGULATED	[cco-1 RNAi] and [jmjd-3.1]:	106.946	184.62	218.558	457.008	569.302	569.521	1.52651	0.227787	2.06308e-11	2.52828e-09	153.695	119.722	134.141					231.604	282.873					335.41	271.591	363.97	0.849316	0.228913	0.000207089	0.000875128
haf-3	WBGene00001813	UP-REGULATED	[cco-1 RNAi] and [jmjd-3.1]:	385.347	408.911	423.759	627.101	557.274	680.702	0.596793	0.161188	0.000213518	0.00258395	359.646	370.717	392.261					600.952	461.53					580.674	581.73	463.864	0.402677	0.161443	0.0126227	0.0307177
spg-7	WBGene00004978	UP-REGULATED	[jmjd-3.1] and [jmjd-1.2 neur.]:	1329.19	1011.6	1160.79	1280.37	1311	1525.91					1291.04	1355.8	1433.89					2053.97	1396.5	0.544226	0.189886	0.00415611	0.0171598	1804.56	1728.54	1632.92	0.544809	0.170958	0.00143858	0.00473061
Y40D12A.2	WBGene00021503	UP-REGULATED	[jmjd-3.1] and [jmjd-1.2 neur.]:	573.776	472.994	614.998	742.054	856.625	878.106					1005.16	728.832	619.894					2082	1103.2	1.40297	0.261378	7.97939e-08	2.1922e-06	1779.38	1871.35	1382.69	1.49287	0.237862	3.46989e-10	6.52183e-09
madd-4	WBGene00009958	UP-REGULATED	[jmjd-3.1] and [jmjd-1.2 neur.]:	76.3903	65.6089	101.994	99.0651	124.284	114.018					217.222	102.919	94.5084					162.123	186.101	0.956263	0.320649	0.00286111	0.0128428	246.076	267.21	151.324	1.28861	0.292669	1.06772e-05	6.36295e-05
vha-6	WBGene00006915	UP-REGULATED	[jmjd-3.1] and [jmjd-1.2 neur.]:	2322.27	2247.49	2812.72	3393.45	2945.4	3861.28					2971.43	2067.83	2074.1					5019.72	2976.12	0.656518	0.234718	0.0051571	0.0203203	4728.23	5246.08	4576.33	0.927495	0.212799	1.30926e-05	7.60138e-05
C23H3.9	WBGene00016022	UP-REGULATED	[jmjd-3.1] and [jmjd-1.2 neur.]:	166.361	65.6089	202.773	345.793	188.431	313.123					314.562	114.471	143.287					443.705	276.918	1.07031	0.37789	0.00462115	0.0186552	553.873	536.172	342.211	1.44181	0.352139	4.23206e-05	0.000214983
F09A5.2	WBGene00008599	UP-REGULATED	[jmjd-3.1] and [jmjd-1.2 neur.]:	15.2781	16.7837	16.9989	13.0841	25.3914	17.5848					36.8867	28.3552	24.3893					31.6932	43.1753	1.00204	0.337001	0.00294532	0.0131559	38.9823	42.0527	41.54	1.15548	0.301668	0.000127981	0.000576122
acr-15	WBGene00000054	UP-REGULATED	[jmjd-3.1] and [jmjd-1.2 neur.]:	59.4147	54.1655	50.3897	73.8315	69.4922	63.5322					86.0691	59.8609	70.1192					84.109	102.728	0.714687	0.273337	0.00893116	0.0313938	116.947	102.504	66.2662	0.76179	0.24423	0.00181373	0.00580448
nhr-31	WBGene00003625	UP-REGULATED	[jmjd-3.1] and [jmjd-1.2 neur.]:	407.415	353.22	383.69	464.484	483.773	469.117					465.183	429.528	442.056					708.222	427.287	0.553548	0.202337	0.00622346	0.0235791	630.214	558.951	518.261	0.55889	0.181609	0.00208787	0.0065438
galt-1	WBGene00019763	UP-REGULATED	[jmjd-3.1] and [jmjd-1.2 neur.]:	32.2537	22.8868	47.3542	52.3363	77.5106	65.234					48.1577	28.3552	39.6326					103.612	46.153	0.949142	0.352109	0.00702635	0.0259858	86.898	80.6011	50.4415	0.932116	0.323256	0.00393258	0.0112799
folt-1	WBGene00007388	UP-REGULATED	[jmjd-3.1] and [jmjd-1.2 neur.]:	67.9025	18.3095	46.7471	96.2614	61.4739	98.1346					65.5764	55.6601	57.9245					119.459	56.5746	0.86943	0.359484	0.0155826	0.0488818	106.389	79.725	85.0581	0.916858	0.331106	0.00562156	0.0153823
plc-3	WBGene00004038	UP-REGULATED	[jmjd-3.1] and [jmjd-1.2 neur.]:	101.854	122.063	132.349	128.972	134.975	148.62					144.473	134.424	122.963					220.634	160.791	0.638399	0.206095	0.00195098	0.00946553	241.203	237.423	253.196	0.981315	0.181052	5.95791e-08	6.42579e-07
pcp-4	WBGene00003959	UP-REGULATED	[jmjd-3.1] and [jmjd-1.2 neur.]:	193.522	203.693	232.521	341.12	273.96	338.082					427.271	253.096	219.503					563.164	416.865	1.12945	0.252942	7.99755e-06	0.000105241	473.472	430.165	428.258	1.00949	0.229496	1.0889e-05	6.47531e-05
cyp-13A6	WBGene00011673	UP-REGULATED	[jmjd-3.1] and [jmjd-1.2] and [jmjd-1.2 neur.]:	11.8829	3.05158	5.46395	6.54203	4.00917	12.4795					764.375	138.625	499.98	3.38578	0.456731	1.23391e-13	2.34515e-11	598.514	203.966	3.07883	0.467836	4.67272e-11	3.30026e-09	540.067	503.757	260.12	3.30789	0.456702	4.38889e-13	1.55875e-11
suro-1	WBGene00011235	UP-REGULATED	[jmjd-3.1] and [jmjd-1.2] and [jmjd-1.2 neur.]:	536.43	366.189	550.644	677.568	692.25	602.422					1481.62	898.963	944.068	1.12266	0.226863	7.47323e-07	1.83408e-05	1106.83	1156.8	1.14249	0.249687	4.74625e-06	6.83752e-05	1926.37	1419.28	1297.63	1.57721	0.22645	3.28521e-12	9.86626e-11
Y113G7B.12	WBGene00013762	UP-REGULATED	[jmjd-3.1] and [jmjd-1.2] and [jmjd-1.2 neur.]:	100.156	98.4133	83.7805	69.1586	110.92	66.3685					173.163	189.034	201.212	0.955286	0.209548	5.14485e-06	9.0617e-05	131.649	169.724	0.644057	0.235741	0.00629403	0.0237813	207.093	222.529	223.525	1.15938	0.20766	2.36324e-08	2.80769e-07
Y105C5B.15	WBGene00013654	UP-REGULATED	[jmjd-3.1] and [jmjd-1.2] and [jmjd-1.2 neur.]:	164.664	196.064	191.845	265.42	247.232	293.269					541.006	347.613	366.855	1.09075	0.248949	1.17904e-05	0.000177617	280.363	610.41	1.15855	0.273155	2.22187e-05	0.000249582	440.987	518.65	507.382	1.29981	0.248304	1.65189e-07	1.59289e-06
T28F3.5	WBGene00012131	UP-REGULATED	[jmjd-3.1] and [jmjd-1.2] and [jmjd-1.2 neur.]:	27.161	12.9692	29.1411	43.9251	42.7644	36.3041					87.0937	53.5597	67.0705	1.39755	0.310256	6.65331e-06	0.000111651	67.0434	35.7313	1.01579	0.342249	0.00299772	0.0133427	82.0252	77.0967	55.3867	1.44326	0.30853	2.89885e-06	2.00795e-05
col-156	WBGene00000729	UP-REGULATED	[jmjd-3.1] and [jmjd-1.2] and [jmjd-1.2 neur.]:	892.918	1206.9	796.522	695.325	1424.59	858.82					4006.31	2963.64	1912.53	1.4648	0.278364	1.42352e-07	4.59329e-06	2023.49	2127.5	0.987785	0.303625	0.0011407	0.00610181	3144.57	2567.85	2052.27	1.28826	0.278357	3.6909e-06	2.50269e-05
sulp-8	WBGene00013963	UP-REGULATED	[jmjd-3.1] and [jmjd-1.2] and [jmjd-1.2 neur.]:	25.4634	25.9384	36.4263	57.9437	29.4006	48.2164					67.6257	45.1582	48.7785	0.751152	0.301347	0.0126795	0.0495212	78.0141	52.1082	0.986351	0.327668	0.00261062	0.0119538	101.516	74.4684	60.3319	1.25166	0.295853	2.32977e-05	0.000126822
C36B7.5	WBGene00016468	UP-REGULATED	[jmjd-3.1] and [jmjd-1.2] and [jmjd-1.2 neur.]:	11.8829	18.3095	21.8558	23.3644	40.0917	36.3041					82.9952	39.9073	27.4379	1.19011	0.368639	0.00124485	0.0079052	32.9122	84.8619	1.34131	0.393707	0.000657094	0.00393123	59.2856	82.3533	57.3648	1.53415	0.365765	2.73637e-05	0.000146056
T01D3.6	WBGene00011330	UP-REGULATED	[jmjd-3.1] and [jmjd-1.2] and [jmjd-1.2 neur.]:	1246.01	1380.07	1509.87	1651.4	1437.95	1499.81					3000.12	2319.87	1633.07	0.710021	0.210286	0.000734266	0.00514868	2375.77	2163.23	0.67631	0.232018	0.00355803	0.0152342	2664.6	3026.92	2083.92	0.863383	0.210154	3.98506e-05	0.000204302
C29F4.2	WBGene00007808	UP-REGULATED	[jmjd-3.1] and [jmjd-1.2] and [jmjd-1.2 neur.]:	98.4586	60.2686	71.6384	67.2895	100.229	83.9533					163.941	101.869	122.963	0.733271	0.237019	0.00197664	0.0114244	175.532	190.567	1.18182	0.258979	5.03387e-06	7.19344e-05	151.056	161.202	131.543	0.913832	0.234885	0.00010002	0.000463729
Y32F6A.4	WBGene00012529	UP-REGULATED	[jmjd-3.1] and [jmjd-1.2] and [jmjd-1.2 neur.]:	493.991	308.209	473.542	599.998	542.574	585.404					610.681	668.972	630.056	0.559937	0.197494	0.00457955	0.0223575	898.381	632.742	0.809067	0.218218	0.000209229	0.00153338	691.124	799.878	655.739	0.721609	0.196957	0.000248521	0.00102826
ncx-7	WBGene00003572	UP-REGULATED	[jmjd-3.1] and [jmjd-1.2] and [jmjd-1.2 neur.]:	263.122	147.239	222.201	283.177	244.559	292.135					314.562	286.702	337.385	0.551045	0.213188	0.0097438	0.04034	453.457	326.048	0.844855	0.23499	0.00032405	0.00220293	397.944	333.794	334.298	0.725891	0.212176	0.000623497	0.00230138
T19D12.1	WBGene00020576	UP-REGULATED	[jmjd-3.1] and [jmjd-1.2] and [jmjd-1.2 neur.]:	444.761	352.457	511.183	584.11	740.36	550.802					1294.11	892.662	812.976	1.12849	0.218991	2.5615e-07	7.39609e-06	1728.5	1199.98	1.63219	0.24074	1.20253e-11	9.79327e-10	1488.64	1334.3	1400.49	1.59579	0.218502	2.80752e-13	1.04831e-11
T21C9.9	WBGene00011895	UP-REGULATED	[jmjd-3.1] and [jmjd-1.2] and [jmjd-1.2 neur.]:	315.747	289.137	211.88	309.345	469.073	304.047					835.075	522.995	380.066	1.00397	0.261834	0.00012589	0.00125238	470.523	579.145	0.863906	0.286939	0.00260588	0.0119495	610.723	692.994	560.79	1.09756	0.261513	2.70506e-05	0.000144662
ttr-14	WBGene00011460	UP-REGULATED	[jmjd-3.1] and [jmjd-1.2] and [jmjd-1.2 neur.]:	1480.27	1308.36	1273.71	1014.02	2004.58	930.293					3866.96	3423.62	1743.83	0.971617	0.346477	0.00504297	0.0240945	1445.7	5102.13	1.04096	0.371663	0.00509729	0.0201443	2335.69	3877.61	2820.77	0.971592	0.346453	0.0050411	0.0139963
clec-66	WBGene00009397	UP-REGULATED	[jmjd-3.1] and [jmjd-1.2]:	407.415	402.045	490.541	590.652	439.672	517.334					1172.18	824.4	623.959	0.946543	0.230857	4.12931e-05	0.00049122	655.806	465.996					953.442	991.744	737.83	0.978908	0.230643	2.19324e-05	0.00012029
pes-8	WBGene00003981	UP-REGULATED	[jmjd-3.1] and [jmjd-1.2]:	712.976	656.852	911.265	1203.73	1050.4	1002.9					1553.34	1265.48	859.722	0.649777	0.218217	0.00290456	0.0155401	947.14	1156.8					1189.77	1302.76	965.311	0.565635	0.218129	0.00951106	0.0241099
F25A2.1	WBGene00017764	UP-REGULATED	[jmjd-3.1]:	13.5805	11.4434	7.28526	19.6261	9.35472	14.7486					10.2463	14.7027	18.292					3.65691	10.4216					25.1761	27.1591	28.6824	1.16635	0.363459	0.00133182	0.00443005
ugt-50	WBGene00011564	UP-REGULATED	[jmjd-3.1]:	853.874	495.118	791.665	1042.05	1015.66	1128.26					1362.76	507.242	753.019					1160.46	984.1					1369.25	1461.33	1323.35	0.87199	0.273308	0.00142028	0.00468145
C06E8.5	WBGene00015544	UP-REGULATED	[jmjd-3.1]:	71.2976	93.073	90.4587	76.6353	179.076	85.0878					259.232	101.869	107.719					110.926	199.5					177.857	215.52	210.667	1.06112	0.332969	0.00143839	0.00473061
lys-2	WBGene00003091	UP-REGULATED	[jmjd-3.1]:	2115.16	1649.38	2027.73	2228.03	1647.77	2540.72					3058.53	1565.83	1273.32					2180.74	1432.23					4227.14	3991.51	3069.02	0.876151	0.275691	0.00148287	0.00486192
acr-12	WBGene00000051	UP-REGULATED	[jmjd-3.1]:	18.6732	23.6497	23.07	36.4485	32.0733	30.6316					33.8128	36.7567	30.4866					24.3794	34.2425					37.358	45.5571	43.5181	0.833153	0.274487	0.00240289	0.00737598
T28C12.2	WBGene00020889	UP-REGULATED	[jmjd-3.1]:	23.7659	22.8868	32.1766	38.3176	26.7278	28.9299					15.3695	18.9034	21.3406					35.3501	43.1753					52.7885	75.3445	28.6824	0.857928	0.321006	0.00752607	0.0198293
K07G5.5	WBGene00010644	UP-REGULATED	[jmjd-3.1]:	202.01	103.754	152.383	128.972	133.639	141.813					164.966	96.6176	130.076					270.611	200.989					261.506	273.343	193.853	0.637579	0.250019	0.0107685	0.0267779
srx-115	WBGene00006006	UP-REGULATED	[jmjd-3.1]:	1.69756	1.52579	0	4.67288	0	1.70176					2.04926	2.10038	2.03244					2.43794	8.93283					6.49705	6.13269	4.94524	1.18648	0.476605	0.0127948	0.0310866
C39D10.11	WBGene00043983	UP-REGULATED	[jmjd-3.1]:	129.015	102.228	114.743	142.056	138.984	140.111					138.325	136.525	121.946					162.123	138.459					151.056	155.946	156.27	0.42256	0.171664	0.0138337	0.0332121
pqn-25	WBGene00004114	UP-REGULATED	[jmjd-3.1]:	40.7415	51.8768	48.5684	68.2241	84.1925	66.9357					74.7981	53.5597	38.6163					58.5106	68.485					101.516	104.256	79.1239	0.923469	0.249677	0.000216743	0.000910747
klo-1	WBGene00016848	UP-REGULATED	[jmjd-3.1]:	629.796	312.786	384.905	534.578	424.972	478.761					478.503	398.022	407.504					919.104	521.082					820.252	883.108	736.841	0.823615	0.247019	0.000855392	0.00303157
C05D11.5	WBGene00015483	UP-REGULATED	[jmjd-3.1]:	62.8098	53.4026	55.2466	59.8129	62.8103	50.4854					60.4533	55.6601	50.811					75.5762	62.5298					87.7102	84.9816	72.2005	0.506021	0.217135	0.0197828	0.0450486

## Sheet: CBP-1,not ATFS-1,dependent(90)
Gene	Wormbase Identifier	Direction	DEG overlap	EV1	EV2	EV3	cco-1_1	cco-1_2	cco-1_3	Log2 FC	lfcSE	pval	padj	sur-5::jmjd-1.2	sur-5::jmjd-1.2	sur-5::jmjd-1.2	Log2 FC	lfcSE	pval	padj	rgef-1::jmjd-1.2	rgef-1::jmjd-1.2	Log2 FC	lfcSE	pval	padj	jmjd-3.1::jmjd-3.1	jmjd-3.1::jmjd-3.1	jmjd-3.1::jmjd-3.1	Log2 FC	lfcSE	pval	padj
R173.3	WBGene00020125	UP-REGULATED	[cco-1 RNAi] and [jmjd-3.1] and [jmjd-1.2 neur.]:	5.09269	6.10315	4.85684	13.0841	20.0458	24.3918	1.35364	0.395211	0.00061453	0.00595941	20.4926	9.45172	7.11354					20.7225	19.3545	1.36462	0.423228	0.00126278	0.00662387	50.3521	33.2918	25.7153	2.13628	0.387696	3.58431e-08	4.08993e-07
Y73B6BL.31	WBGene00022252	UP-REGULATED	[cco-1 RNAi] and [jmjd-3.1] and [jmjd-1.2 neur.]:	50.9269	37.3818	64.3532	105.607	60.1375	87.9241	0.674493	0.258242	0.00900484	0.0468467	81.9705	74.5636	91.4598					129.211	89.3283	0.999294	0.283554	0.000424807	0.00275193	138.874	145.432	119.675	1.28855	0.254296	4.03859e-07	3.51862e-06
fkh-9	WBGene00001441	UP-REGULATED	[cco-1 RNAi] and [jmjd-3.1] and [jmjd-1.2 neur.]:	147.688	259.384	290.196	483.176	596.03	527.544	1.11333	0.229403	1.21503e-06	3.74515e-05	310.463	237.343	206.293					520.5	390.067	0.887572	0.253483	0.000462637	0.00294677	581.486	526.535	553.867	1.16036	0.229229	4.14809e-07	3.60277e-06
Y75B8A.6	WBGene00013543	UP-REGULATED	[cco-1 RNAi] and [jmjd-3.1] and [jmjd-1.2 neur.]:	91.6684	110.62	143.884	376.634	217.831	368.714	1.35359	0.255629	1.18938e-07	5.0912e-06	110.66	108.17	79.2651					269.392	169.724	0.833212	0.2828	0.00321608	0.0140901	259.07	208.512	278.912	1.0067	0.256247	8.54228e-05	0.000402182
sptl-2	WBGene00018398	UP-REGULATED	[cco-1 RNAi] and [jmjd-3.1] and [jmjd-1.2 neur.]:	268.215	213.61	272.59	382.242	428.981	378.924	0.630015	0.191876	0.00102543	0.00884866	305.34	311.907	334.336					636.303	467.485	1.08002	0.211868	3.43951e-07	7.7654e-06	462.103	476.598	328.364	0.71997	0.191493	0.000170066	0.000737967
Y54G11A.7	WBGene00013216	UP-REGULATED	[cco-1 RNAi] and [jmjd-3.1] and [jmjd-1.2 neur.]:	850.479	839.946	800.165	2016.82	1829.52	2124.36	1.18401	0.230178	2.69118e-07	1.04591e-05	826.878	965.125	1032.48					2129.54	1009.41	0.854896	0.253434	0.000742873	0.00432606	1588.53	1756.58	1201.69	0.814518	0.230303	0.000405128	0.00158452
gdh-1	WBGene00014095	UP-REGULATED	[cco-1 RNAi] and [jmjd-3.1] and [jmjd-1.2 neur.]:	4695.46	10528.7	7232.44	13824.3	11959.3	14524.5	0.77677	0.257867	0.00259284	0.0184806	6841.47	8321.71	5848.34					16932.7	9631.08	0.749102	0.282178	0.00793765	0.0286653	12720.4	13951	11789.5	0.714307	0.257866	0.00560433	0.0153471
W06H3.3	WBGene00012316	UP-REGULATED	[cco-1 RNAi] and [jmjd-3.1] and [jmjd-1.2 neur.]:	417.6	380.684	448.651	702.801	628.103	664.252	0.650328	0.189158	0.000586005	0.00574883	393.459	479.937	562.986					871.564	550.858	0.73906	0.209815	0.000427614	0.00276314	700.057	692.994	715.082	0.72608	0.188937	0.000121556	0.000550753
F48G7.8	WBGene00018619	UP-REGULATED	[cco-1 RNAi] and [jmjd-3.1] and [jmjd-1.2 neur.]:	23.7659	37.3818	37.6405	67.2895	130.966	74.31	1.2051	0.33872	0.000373977	0.00406506	93.2415	61.9613	25.4055					86.5469	65.5074	0.980825	0.367527	0.00761421	0.0277119	88.5223	83.2294	69.2334	1.06319	0.339024	0.0017126	0.00551035
T07D3.6	WBGene00020309	UP-REGULATED	[cco-1 RNAi] and [jmjd-3.1] and [jmjd-1.2 neur.]:	0	0.762894	0	8.41119	4.00917	6.23977	1.57347	0.473606	0.00089271	0.00794466	5.12316	3.15057	2.03244					2.43794	8.93283	1.34495	0.47603	0.00472283	0.0189847	4.06066	5.25659	5.93429	1.35503	0.47455	0.00429826	0.0121949
crtc-1	WBGene00021237	UP-REGULATED	[cco-1 RNAi] and [jmjd-3.1] and [jmjd-1.2] and [jmjd-1.2 neur.]	25.4634	28.2271	35.2121	160.747	100.229	181.521	2.08461	0.258655	7.66488e-16	2.11774e-13	142.424	109.22	107.719	1.79042	0.260871	6.73074e-12	7.71604e-10	224.291	150.369	2.37673	0.281143	2.81963e-17	7.99133e-15	229.021	210.264	219.569	2.61063	0.256528	2.51775e-24	5.19962e-22
pab-2	WBGene00003903	UP-REGULATED	[cco-1 RNAi] and [jmjd-3.1] and [jmjd-1.2] and [jmjd-1.2 neur.]	285.19	189.961	231.307	666.353	674.876	718.708	1.44355	0.238017	1.32035e-09	9.60004e-08	674.208	447.381	450.185	1.07855	0.238638	6.19563e-06	0.000105049	1293.33	687.828	1.92079	0.260879	1.80106e-13	2.26366e-11	1312.4	1088.99	1129.49	2.1722	0.23736	5.61367e-20	6.38812e-18
vhp-1	WBGene00006923	UP-REGULATED	[cco-1 RNAi] and [jmjd-3.1] and [jmjd-1.2] and [jmjd-1.2 neur.]	76.3903	64.0831	74.6739	204.672	148.339	225.199	1.34445	0.232215	7.05214e-09	4.20253e-07	126.03	126.023	94.5084	0.641922	0.236637	0.0066739	0.0300841	237.699	141.436	1.31088	0.256951	3.36679e-07	7.67725e-06	358.962	328.537	306.605	2.07667	0.229789	1.60608e-19	1.70042e-17
F40F4.6	WBGene00018237	UP-REGULATED	[cco-1 RNAi] and [jmjd-3.1] and [jmjd-1.2] and [jmjd-1.2 neur.]	1981.06	2108.64	2065.37	4110.27	4077.32	3836.89	0.921812	0.197138	2.92558e-06	7.67825e-05	6202.1	4370.89	3370.8	1.12607	0.197119	1.11257e-08	5.37015e-07	5523.15	7110.53	1.53824	0.217619	1.56636e-12	1.56264e-10	6772.36	6793.27	6125.18	1.60221	0.196996	4.18196e-16	2.58139e-14
C02B10.3	WBGene00015328	UP-REGULATED	[cco-1 RNAi] and [jmjd-3.1] and [jmjd-1.2] and [jmjd-1.2 neur.]	61.1122	76.2894	110.493	306.541	212.486	268.877	1.49078	0.26976	3.27029e-08	1.67325e-06	398.582	207.938	251.006	1.60065	0.269812	2.98414e-09	1.64783e-07	464.428	355.824	2.05657	0.293462	2.41837e-12	2.2776e-10	518.952	435.421	341.222	2.14968	0.268476	1.17562e-15	6.7813e-14
W02G9.4	WBGene00020954	UP-REGULATED	[cco-1 RNAi] and [jmjd-3.1] and [jmjd-1.2] and [jmjd-1.2 neur.]	100.156	80.8667	119.6	170.093	145.666	165.07	0.638367	0.213335	0.00276868	0.0194709	150.621	166.98	133.125	0.546166	0.214707	0.0109661	0.0442352	263.298	227.787	1.21114	0.234034	2.27871e-07	5.4696e-06	359.774	384.607	260.12	1.64971	0.209318	3.23865e-15	1.742e-13
ZK970.1	WBGene00014171	UP-REGULATED	[cco-1 RNAi] and [jmjd-3.1] and [jmjd-1.2] and [jmjd-1.2 neur.]	45.8342	47.2994	67.3887	149.532	122.948	134.439	1.23258	0.223889	3.68504e-08	1.85423e-06	134.227	116.571	98.5733	1.02071	0.226318	6.48074e-06	0.000108979	123.116	102.728	0.981873	0.251872	9.68702e-05	0.000818984	191.663	193.618	147.368	1.60171	0.221708	5.03294e-13	1.77244e-11
K08H10.6	WBGene00010698	UP-REGULATED	[cco-1 RNAi] and [jmjd-3.1] and [jmjd-1.2] and [jmjd-1.2 neur.]	23.7659	28.99	36.4263	61.682	54.7919	51.0527	0.779269	0.260998	0.00282902	0.0197449	82.9952	68.2624	49.7948	1.02729	0.260222	7.88856e-05	0.000841635	81.671	68.485	1.17358	0.285932	4.05358e-05	0.000408222	124.256	104.256	92.9705	1.66617	0.253383	4.84301e-11	1.10978e-09
ugt-16	WBGene00013901	UP-REGULATED	[cco-1 RNAi] and [jmjd-3.1] and [jmjd-1.2] and [jmjd-1.2 neur.]	98.4586	94.5988	244.663	370.092	494.464	617.17	1.43757	0.354873	5.10109e-05	0.000809655	459.035	221.59	380.066	1.03434	0.355268	0.00359759	0.0184161	1272.61	413.888	2.03579	0.379527	8.13879e-08	2.23215e-06	907.962	841.055	581.56	1.98927	0.354555	2.0162e-08	2.44044e-07
F54C1.1	WBGene00018789	UP-REGULATED	[cco-1 RNAi] and [jmjd-3.1] and [jmjd-1.2] and [jmjd-1.2 neur.]	16.9756	25.9384	17.6061	57.0092	64.1467	46.5147	1.19782	0.339167	0.000412983	0.00439474	79.9213	40.9574	50.811	1.23659	0.339895	0.000274587	0.00234073	32.9122	108.683	1.46703	0.365311	5.92377e-05	0.000555554	86.898	98.9992	92.9705	1.85023	0.335534	3.50194e-08	4.00413e-07
tpra-1	WBGene00008366	UP-REGULATED	[cco-1 RNAi] and [jmjd-3.1] and [jmjd-1.2] and [jmjd-1.2 neur.]	52.6244	34.3302	72.8526	118.691	89.5381	119.69	0.948591	0.256509	0.000217242	0.00262625	112.709	76.6639	83.33	0.694274	0.259188	0.00739189	0.0325048	108.488	114.638	0.959608	0.283842	0.000722788	0.00423692	151.869	162.078	137.478	1.37108	0.254109	6.82871e-08	7.25274e-07
fbxa-74	WBGene00021262	UP-REGULATED	[cco-1 RNAi] and [jmjd-3.1] and [jmjd-1.2] and [jmjd-1.2 neur.]	40.7415	48.8252	82.5663	200.934	122.948	153.725	1.29824	0.281057	3.85349e-06	9.72717e-05	139.35	92.4168	111.784	0.86251	0.283468	0.0023446	0.0130838	165.78	126.548	1.17267	0.308396	0.000143264	0.00112705	162.426	120.026	204.733	1.32007	0.280749	2.57693e-06	1.81962e-05
crh-1	WBGene00000793	UP-REGULATED	[cco-1 RNAi] and [jmjd-3.1] and [jmjd-1.2] and [jmjd-1.2 neur.]	135.805	204.456	105.636	228.971	264.605	249.024	0.677873	0.247356	0.00613515	0.0352342	330.956	433.729	239.828	1.08419	0.246682	1.10715e-05	0.000168967	279.144	259.052	0.788586	0.272289	0.00377782	0.0159866	365.459	305.758	296.714	1.03527	0.24634	2.63872e-05	0.000141431
nas-4	WBGene00003523	UP-REGULATED	[cco-1 RNAi] and [jmjd-3.1] and [jmjd-1.2] and [jmjd-1.2 neur.]	61.1122	61.0315	82.5663	160.747	126.957	149.755	0.990179	0.266117	0.000198564	0.00245116	193.655	112.37	114.833	0.935528	0.266981	0.000458141	0.00353056	129.211	123.571	0.794997	0.294357	0.00691743	0.0256245	142.123	192.742	101.872	0.986601	0.265861	0.000206468	0.000872891
ugt-13	WBGene00019232	UP-REGULATED	[cco-1 RNAi] and [jmjd-3.1] and [jmjd-1.2] and [jmjd-1.2 neur.]	145.99	161.733	180.917	259.812	478.427	369.281	1.07324	0.263633	4.68198e-05	0.000754479	300.217	307.706	263.201	0.756988	0.264507	0.00421141	0.0209609	302.305	361.78	0.926116	0.289397	0.00137354	0.00710446	293.991	485.359	222.536	0.94328	0.263723	0.000347846	0.00138674
F53F8.4	WBGene00010001	UP-REGULATED	[cco-1 RNAi] and [jmjd-3.1] and [jmjd-1.2] and [jmjd-1.2 neur.]	62.8098	77.8152	62.5318	78.5044	177.74	110.614	0.760223	0.261949	0.0037057	0.0242469	153.695	142.826	122.963	0.952516	0.261716	0.000273166	0.00233154	115.802	160.791	0.924587	0.28809	0.00133027	0.00691655	129.941	148.061	118.686	0.878987	0.261083	0.000760747	0.00273614
T19A5.3	WBGene00020554	UP-REGULATED	[cco-1 RNAi] and [jmjd-3.1] and [jmjd-1.2] and [jmjd-1.2 neur.]	446.459	511.139	798.95	1064.48	799.161	952.416	0.63286	0.233949	0.00682792	0.0380062	1124.02	908.415	735.743	0.608964	0.234075	0.00927955	0.0387715	1066.6	863.507	0.665838	0.257444	0.00970007	0.0335571	1249.06	907.638	966.3	0.772253	0.233787	0.00095574	0.00333284
mltn-9	WBGene00008964	UP-REGULATED	[cco-1 RNAi] and [jmjd-3.1] and [jmjd-1.2] and [jmjd-1.2 neur.]	190.127	148.764	451.686	802.801	371.516	1001.77	1.22047	0.347378	0.00044246	0.00462422	875.036	520.895	672.737	1.15682	0.347471	0.0008708	0.005901	914.228	451.108	1.12855	0.37278	0.00246676	0.0114494	601.789	600.128	692.334	1.04904	0.34742	0.00253188	0.00771602
cdr-5	WBGene00010473	UP-REGULATED	[cco-1 RNAi] and [jmjd-3.1] and [jmjd-1.2] and [jmjd-1.2 neur.]	37.3464	39.6705	62.5318	714.016	561.283	841.235	3.29411	0.3323	3.65356e-23	2.92208e-20	214.148	206.888	270.314	1.88999	0.333868	1.50578e-08	6.95255e-07	694.813	205.455	2.70158	0.358014	4.48819e-14	6.75853e-12	1051.71	1176.6	576.615	3.65146	0.33208	4.00626e-28	1.17573e-25
tag-341	WBGene00014051	UP-REGULATED	[cco-1 RNAi] and [jmjd-3.1] and [jmjd-1.2] and [jmjd-1.2 neur.]	61.1122	35.0931	52.8182	121.495	106.911	104.374	1.08482	0.246625	1.08932e-05	0.000233803	196.729	116.571	129.06	1.46974	0.245322	2.08467e-09	1.19558e-07	235.261	177.168	1.91019	0.266762	8.02997e-13	8.66043e-11	347.592	296.997	319.463	2.53005	0.240862	8.26803e-26	2.00446e-23
nhr-85	WBGene00003675	UP-REGULATED	[cco-1 RNAi] and [jmjd-3.1] and [jmjd-1.2] and [jmjd-1.2 neur.]	22.0683	19.0723	15.7847	40.1868	40.0917	43.1112	0.982957	0.303281	0.0011908	0.00998089	52.2562	70.3628	63.0056	1.50789	0.299876	4.94602e-07	1.27916e-05	120.678	72.9514	2.07555	0.321074	1.01704e-10	6.68065e-09	210.342	144.556	107.806	2.7257	0.291757	9.42182e-21	1.29187e-18
C35A5.6	WBGene00007950	UP-REGULATED	[cco-1 RNAi] and [jmjd-3.1] and [jmjd-1.2] and [jmjd-1.2 neur.]	54.322	38.9076	50.3897	95.3268	106.911	95.8656	0.989642	0.238108	3.23471e-05	0.000568262	115.783	64.0616	82.3138	0.8207	0.240764	0.000652642	0.00466234	115.802	108.683	1.14927	0.263563	1.29758e-05	0.000158227	121.82	119.149	100.883	1.18246	0.236472	5.72076e-07	4.76816e-06
M60.4	WBGene00019780	UP-REGULATED	[cco-1 RNAi] and [jmjd-3.1] and [jmjd-1.2] and [jmjd-1.2 neur.]	147.688	121.3	111.707	171.962	160.367	246.755	0.59883	0.213021	0.00493683	0.0301164	244.887	198.486	198.163	0.727707	0.213094	0.0006379	0.00457302	224.291	184.612	0.664606	0.237103	0.00506249	0.0200415	229.833	201.503	180.996	0.665235	0.212478	0.00174303	0.00560289
nhr-201	WBGene00019741	UP-REGULATED	[cco-1 RNAi] and [jmjd-3.1] and [jmjd-1.2] and [jmjd-1.2 neur.]	13.5805	21.361	24.8913	50.4671	25.3914	48.2164	0.900142	0.294542	0.00224257	0.0164947	43.0345	44.108	48.7785	0.988664	0.29558	0.000823333	0.00565199	46.3209	32.7537	0.812955	0.328577	0.0133547	0.043362	42.2308	41.1766	39.5619	0.858865	0.294621	0.00355511	0.0103642
H05C05.1	WBGene00019157	UP-REGULATED	[cco-1 RNAi] and [jmjd-3.1] and [jmjd-1.2] and [jmjd-1.2 neur.]	239.356	272.353	224.629	479.438	400.917	408.421	0.766116	0.208822	0.000243741	0.0028869	325.833	520.895	385.147	0.703597	0.209255	0.000772703	0.00535616	449.8	415.377	0.770201	0.231444	0.000875344	0.00494943	335.41	298.75	450.017	0.527488	0.209181	0.0116794	0.0287062
ccch-1	WBGene00009532	UP-REGULATED	[cco-1 RNAi] and [jmjd-3.1]:	74.6927	172.414	125.671	257.008	387.553	221.228	1.06788	0.291544	0.00024943	0.00294052	238.739	187.984	108.736					196.254	244.164					276.125	301.378	314.517	1.11131	0.291337	0.000136452	0.000610639
ZC190.4	WBGene00022538	UP-REGULATED	[cco-1 RNAi] and [jmjd-3.1]:	72.9952	76.2894	84.3876	216.822	160.367	175.281	1.06501	0.329942	0.00124712	0.0103672	99.3893	98.7179	68.0867					213.32	49.1306					266.379	167.335	166.16	1.16908	0.329582	0.000389402	0.00153305
Y4C6B.4	WBGene00021158	UP-REGULATED	[cco-1 RNAi] and [jmjd-3.1]:	16.9756	4.57736	11.535	29.9064	17.3731	24.9591	1.01962	0.359506	0.00456582	0.0282846	25.6158	16.8031	15.2433					14.6276	16.3769					24.3639	28.0352	30.6605	1.17544	0.357269	0.00100163	0.00347403
ets-4	WBGene00017687	UP-REGULATED	[cco-1 RNAi] and [jmjd-3.1]:	89.9708	90.0215	120.814	323.363	173.731	262.638	1.19608	0.289551	3.61498e-05	0.000617921	146.522	127.073	126.011					245.013	89.3283					232.269	203.255	178.029	0.914448	0.290009	0.00161507	0.00524294
K02D3.1	WBGene00010504	UP-REGULATED	[cco-1 RNAi] and [jmjd-3.1]:	8.48781	3.81447	13.9634	14.0186	38.7553	22.6901	1.12834	0.385922	0.00345844	0.0229491	21.5173	18.9034	16.2595					20.7225	19.3545					31.6731	24.5308	18.7919	1.15402	0.385263	0.0027408	0.00828929
F36A2.3	WBGene00009453	UP-REGULATED	[cco-1 RNAi] and [jmjd-3.1]:	1622.87	1232.07	1374.49	2299.06	2222.41	2683.1	0.72838	0.216655	0.000773976	0.00711515	1093.28	1275.98	1298.73					2589.09	1444.14					2261.78	2435.55	1684.35	0.562533	0.216685	0.00942923	0.0239242
nhr-3	WBGene00003602	UP-REGULATED	[cco-1 RNAi] and [jmjd-3.1]:	144.293	155.63	119.6	230.84	237.877	189.462	0.619235	0.200512	0.00201326	0.015198	132.178	108.17	131.092					207.225	159.302					194.099	231.29	168.138	0.483659	0.200832	0.0160281	0.0376003
Y97E10C.1	WBGene00022410	UP-REGULATED	[cco-1 RNAi] and [jmjd-3.1]:	86.5757	120.537	129.921	211.214	217.831	254.129	0.94442	0.217327	1.38881e-05	0.000282318	189.557	156.478	119.914					177.97	150.369					341.095	268.086	257.153	1.26818	0.216064	4.37195e-09	6.21888e-08
olrn-1	WBGene00007260	UP-REGULATED	[cco-1 RNAi] and [jmjd-3.1]:	13.5805	20.5981	20.0345	44.8597	49.4464	79.9825	1.45604	0.308346	2.33416e-06	6.32262e-05	37.9114	19.9536	21.3406					32.9122	40.1977					64.1584	56.9464	68.2443	1.54342	0.307299	5.09898e-07	4.31441e-06
K02E2.8	WBGene00010509	UP-REGULATED	[cco-1 RNAi] and [jmjd-3.1]:	95.0635	63.3202	77.7095	233.644	272.623	238.813	1.51353	0.28154	7.61974e-08	3.50878e-06	119.882	106.069	85.3625					109.707	59.5522					225.772	160.326	94.9486	0.941243	0.282899	0.000877435	0.00309243
T25B6.2	WBGene00020788	UP-REGULATED	[jmjd-3.1] and [jmjd-1.2 neur.]:	685.815	507.324	767.381	877.567	1050.4	1005.74					841.223	1208.77	1097.52					3882.42	1735.95	1.8978	0.285425	2.95023e-11	2.14052e-09	2658.92	2644.94	1806.99	1.70707	0.261019	6.15091e-11	1.37007e-09
R193.2	WBGene00020128	UP-REGULATED	[jmjd-3.1] and [jmjd-1.2 neur.]:	2186.46	1864.51	2883.14	2992.51	3765.94	3660.48					3140.5	2334.57	2526.32					7096.85	3817.3	1.1487	0.249687	4.21311e-06	6.20599e-05	5334.08	5370.49	4853.26	1.09536	0.226976	1.39376e-06	1.05449e-05
C15C8.3	WBGene00007605	UP-REGULATED	[jmjd-3.1] and [jmjd-1.2 neur.]:	12363.3	8632.91	12415.3	15657.9	13937.2	14951.1					14219.8	13205.1	13969					28433.7	18638.3	1.01243	0.232053	1.28324e-05	0.000156599	24815.5	26160.3	16804.9	0.968399	0.210479	4.20597e-06	2.80644e-05
Y102A11A.3	WBGene00022413	UP-REGULATED	[jmjd-3.1] and [jmjd-1.2 neur.]:	426.088	286.848	280.483	232.71	343.452	211.018					356.572	296.154	336.369					880.097	378.156	0.834473	0.291843	0.00424542	0.0174428	795.076	703.507	770.469	1.09837	0.26636	3.72941e-05	0.000192489
C34H4.2	WBGene00016425	UP-REGULATED	[jmjd-3.1] and [jmjd-1.2 neur.]:	334.42	354.746	417.688	393.457	589.348	471.386					670.109	467.335	400.391					693.594	528.526	0.680371	0.237987	0.0042517	0.0174641	712.239	718.401	646.837	0.856449	0.214941	6.75975e-05	0.000324468
C17H12.6	WBGene00015932	UP-REGULATED	[jmjd-3.1] and [jmjd-1.2 neur.]:	8.48781	5.34026	12.7492	14.9532	10.6911	15.8831					6.14779	21.0038	13.2109					20.7225	26.7985	1.06259	0.40462	0.00863562	0.03055	30.861	29.7874	29.6714	1.40985	0.370033	0.000138924	0.000619383
F21F8.11	WBGene00017681	UP-REGULATED	[jmjd-3.1] and [jmjd-1.2 neur.]:	98.4586	94.5988	122.635	141.121	173.731	141.813					164.966	101.869	114.833					165.78	184.612	0.676995	0.241889	0.00512948	0.0202365	195.724	206.759	160.226	0.780847	0.216115	0.000302539	0.0012251
H20E11.1	WBGene00019213	UP-REGULATED	[jmjd-3.1] and [jmjd-1.2 neur.]:	74.6927	70.9491	132.349	140.186	112.257	123.661					159.843	87.1658	136.173					213.32	198.011	1.02378	0.279612	0.000250818	0.00178457	172.984	162.954	177.04	0.795306	0.254393	0.00177026	0.00568276
dct-17	WBGene00009431	UP-REGULATED	[jmjd-3.1] and [jmjd-1.2 neur.]:	118.829	120.537	149.348	95.3268	89.5381	69.2048					183.409	199.536	109.752					253.546	390.067	1.18752	0.264542	7.15684e-06	9.59173e-05	188.414	205.883	219.569	0.606703	0.241526	0.0120063	0.0294229
B0252.1	WBGene00015087	UP-REGULATED	[jmjd-3.1] and [jmjd-1.2 neur.]:	52.6244	38.9076	61.3176	57.0092	69.4922	60.696					58.404	57.7605	59.957					107.269	74.4402	0.758344	0.283633	0.00750249	0.0274541	117.759	84.1055	71.2115	0.775166	0.25455	0.00232497	0.00717965
T06D8.1	WBGene00011522	UP-REGULATED	[jmjd-3.1] and [jmjd-1.2] and [jmjd-1.2 neur.]:	205.405	173.177	216.737	328.036	390.226	312.556					1041.03	834.902	788.586	1.92327	0.29142	4.12062e-11	3.80517e-09	2175.86	982.611	2.62708	0.316246	9.80692e-17	2.33639e-14	2582.58	1845.94	1033.56	2.86016	0.290923	8.25084e-23	1.4683e-20
C04E12.4	WBGene00015434	UP-REGULATED	[jmjd-3.1] and [jmjd-1.2] and [jmjd-1.2 neur.]:	66.2049	91.5473	86.2089	77.5698	118.939	112.883					223.37	186.934	164.628	1.14958	0.20504	2.06313e-08	9.01548e-07	284.02	275.429	1.65677	0.223987	1.39577e-13	1.79959e-11	259.882	262.83	265.065	1.5858	0.202281	4.52133e-15	2.35616e-13
K10B2.2	WBGene00019605	UP-REGULATED	[jmjd-3.1] and [jmjd-1.2] and [jmjd-1.2 neur.]:	422.693	396.705	556.108	751.399	760.405	757.282					1111.73	663.721	723.548	0.787902	0.259659	0.00241039	0.013387	1844.3	954.324	1.45759	0.283647	2.76557e-07	6.52054e-06	1720.09	1998.38	1214.55	1.69301	0.259031	6.32143e-11	1.40059e-09
clec-160	WBGene00017322	UP-REGULATED	[jmjd-3.1] and [jmjd-1.2] and [jmjd-1.2 neur.]:	162.966	144.95	209.451	205.607	200.458	195.135					468.257	377.019	368.888	1.15897	0.213313	5.53619e-08	2.01535e-06	440.048	400.489	1.20013	0.235533	3.48087e-07	7.83876e-06	419.06	601.004	364.959	1.34044	0.212509	2.83269e-10	5.45913e-09
C40H1.8	WBGene00008043	UP-REGULATED	[jmjd-3.1] and [jmjd-1.2] and [jmjd-1.2 neur.]:	110.342	105.279	194.881	262.616	181.749	224.632					281.774	277.25	349.58	0.983554	0.320165	0.00212614	0.0120949	817.929	247.142	1.65855	0.345129	1.54301e-06	2.69764e-05	525.449	471.341	337.265	1.47025	0.319361	4.14968e-06	2.77331e-05
K10C2.1	WBGene00019617	UP-REGULATED	[jmjd-3.1] and [jmjd-1.2] and [jmjd-1.2 neur.]:	2464.86	1657.77	2843.68	2882.23	2894.62	3278.72					5813.76	3099.11	3243.77	0.737431	0.260383	0.0046243	0.0225087	6600.72	3942.36	1.07022	0.284762	0.000171065	0.0012984	5758.01	5324.93	4409.18	1.05949	0.260309	4.69854e-05	0.000236099
F54E2.1	WBGene00018823	UP-REGULATED	[jmjd-3.1] and [jmjd-1.2] and [jmjd-1.2 neur.]:	614.518	783.492	1038.15	1098.13	1030.36	1220.16					1888.4	1971.21	1118.86	0.963886	0.229009	2.56558e-05	0.000330974	2291.66	1777.63	1.22505	0.251746	1.13754e-06	2.07277e-05	1474.02	1681.23	1503.35	0.873913	0.228951	0.000135066	0.000605085
C13E3.1	WBGene00015740	UP-REGULATED	[jmjd-3.1] and [jmjd-1.2] and [jmjd-1.2 neur.]:	45.8342	35.0931	23.07	18.6915	32.0733	24.3918					92.2169	48.3088	54.8759	0.860753	0.294313	0.00344882	0.017822	67.0434	68.485	0.887506	0.322639	0.0059456	0.0227607	69.8433	77.0967	64.2881	0.964715	0.291883	0.000949271	0.00331304
K03B8.6	WBGene00010524	UP-REGULATED	[jmjd-3.1] and [jmjd-1.2] and [jmjd-1.2 neur.]:	225.776	252.518	386.119	434.578	340.779	440.188					627.075	549.25	382.099	0.783631	0.24069	0.00113084	0.00732603	772.827	530.015	1.07438	0.264077	4.73289e-05	0.00046234	551.437	505.509	437.159	0.727378	0.240473	0.00248818	0.00760085
fbxa-60	WBGene00020456	UP-REGULATED	[jmjd-3.1] and [jmjd-1.2] and [jmjd-1.2 neur.]:	120.527	105.279	110.493	132.71	125.621	114.018					199.803	208.988	173.774	0.775888	0.173028	7.31975e-06	0.000120756	160.904	160.791	0.510255	0.19736	0.00972652	0.0336268	146.184	165.583	168.138	0.503803	0.173442	0.00367564	0.010671
F59E11.5	WBGene00019111	UP-REGULATED	[jmjd-3.1] and [jmjd-1.2] and [jmjd-1.2 neur.]:	178.244	174.703	226.45	202.803	257.923	263.205					462.109	344.463	330.271	0.919992	0.201543	5.00135e-06	8.87591e-05	369.348	393.044	0.918474	0.223407	3.93588e-05	0.000398633	287.494	339.05	245.284	0.555017	0.201993	0.00600125	0.0162336
mpz-1	WBGene00003404	UP-REGULATED	[jmjd-3.1] and [jmjd-1.2] and [jmjd-1.2 neur.]:	241.054	186.146	190.631	179.439	200.458	152.024					448.789	249.945	276.412	0.628402	0.221654	0.00458166	0.0223611	550.975	436.22	1.18483	0.243096	1.09403e-06	2.01418e-05	713.863	714.021	722.994	1.70949	0.21932	6.4665e-15	3.308e-13
glt-5	WBGene00001623	UP-REGULATED	[jmjd-3.1] and [jmjd-1.2] and [jmjd-1.2 neur.]:	5.09269	12.9692	16.9989	24.299	28.0642	26.6608					42.0099	23.1042	24.3893	1.00196	0.360537	0.00545132	0.025604	35.3501	32.7537	1.14457	0.387127	0.00311082	0.0137358	54.4128	64.8313	25.7153	1.60966	0.353379	5.23742e-06	3.41566e-05
fkb-4	WBGene00001429	UP-REGULATED	[jmjd-3.1] and [jmjd-1.2] and [jmjd-1.2 neur.]:	227.473	110.62	163.918	157.009	96.22	153.725					441.616	261.498	315.028	0.934923	0.279897	0.000837066	0.00572223	358.377	279.895	0.839458	0.30588	0.00606206	0.0231268	473.472	347.811	274.955	1.0331	0.279402	0.000217694	0.000914282
C02B8.3	WBGene00015322	UP-REGULATED	[jmjd-3.1] and [jmjd-1.2] and [jmjd-1.2 neur.]:	8.48781	6.10315	18.2132	25.2336	17.3731	27.7954					54.3055	19.9536	23.3731	1.17698	0.386179	0.00230559	0.0129191	40.226	20.8433	1.08594	0.412832	0.00852706	0.0302801	39.7944	29.7874	32.6386	1.23442	0.384163	0.00131237	0.0043723
W07A12.4	WBGene00012322	UP-REGULATED	[jmjd-3.1] and [jmjd-1.2]:	8.48781	5.34026	7.89237	20.5607	21.3822	10.7778					28.6897	19.9536	16.2595	1.26266	0.379179	0.000868494	0.00589516	17.0656	8.93283					18.679	21.9025	22.7481	1.2333	0.376792	0.00106356	0.00365699
C07A9.9	WBGene00007405	UP-REGULATED	[jmjd-3.1] and [jmjd-1.2]:	69.6001	57.9799	50.9968	42.9905	57.4647	48.2164					195.705	178.532	165.644	1.52293	0.234186	7.86977e-11	6.77007e-09	58.5106	95.2835					116.135	111.265	78.1348	0.750268	0.237427	0.00157772	0.00513866
dct-5	WBGene00017218	UP-REGULATED	[jmjd-3.1] and [jmjd-1.2]:	120.527	144.187	123.242	103.738	216.495	114.018					425.222	187.984	169.709	0.889478	0.310944	0.00422873	0.0210151	140.182	215.877					227.397	240.927	212.645	0.711429	0.310889	0.0221158	0.0494523
Y69A2AR.12	WBGene00022083	UP-REGULATED	[jmjd-3.1]:	44.1366	60.2686	29.1411	26.1681	60.1375	36.8714					14.3448	11.5521	12.1946	-1.48121	0.338933	1.24129e-05	0.000185456	13.4087	17.8657	-1.14838	0.367522	0.0017801	0.00878258	151.869	141.928	209.678	1.73815	0.303615	1.03524e-08	1.35292e-07
nspe-1	WBGene00012591	UP-REGULATED	[jmjd-3.1]:	57.7171	206.744	117.778	152.336	247.232	196.269					162.916	115.521	154.465					245.013	132.504					430.429	418.775	196.821	1.22801	0.340162	0.000306117	0.00123719
Y51H4A.25	WBGene00013119	UP-REGULATED	[jmjd-3.1]:	27.161	10.6805	17.6061	14.9532	20.0458	26.0936					31.7636	27.305	30.4866					40.226	28.2873					43.0429	39.4244	30.6605	0.971603	0.320281	0.0024166	0.00741334
hrg-3	WBGene00010256	UP-REGULATED	[jmjd-3.1]:	106.946	89.2586	66.1745	85.981	94.8836	100.404					64.5518	87.1658	67.0705					138.963	50.6194					169.735	183.981	127.587	0.81074	0.282674	0.00412938	0.0117737
F48G7.5	WBGene00018616	UP-REGULATED	[jmjd-3.1]:	101.854	116.723	85.6018	78.5044	205.804	106.076					257.183	176.432	82.3138					173.094	144.414					207.093	256.697	183.963	0.941015	0.329383	0.00427798	0.0121456
clec-42	WBGene00008891	UP-REGULATED	[jmjd-3.1]:	1.69756	0	1.21421	7.47661	1.33639	4.53802					11.2709	2.10038	4.06488					7.31382	4.46641					7.30918	9.63709	3.95619	1.30068	0.47474	0.00614825	0.0165723
F28F5.6	WBGene00017905	UP-REGULATED	[jmjd-3.1]:	218.986	164.022	194.274	214.953	177.74	195.135					368.867	180.633	220.52					245.013	290.317					315.919	290.865	293.747	0.607669	0.231909	0.0087856	0.0225407
scav-5	WBGene00011076	UP-REGULATED	[jmjd-3.1]:	100.156	69.4233	95.9226	142.99	53.4556	89.6258					171.114	137.575	136.173					170.656	120.593					166.487	174.344	116.708	0.716026	0.282874	0.0113654	0.0280619
F29C6.1	WBGene00009243	UP-REGULATED	[jmjd-3.1]:	298.771	218.188	258.627	259.812	302.024	277.386					233.616	186.934	230.682					335.217	315.627					396.32	420.527	278.912	0.487085	0.193459	0.0118101	0.0289847
Y69A2AR.25	WBGene00022096	UP-REGULATED	[jmjd-3.1]:	5.09269	12.9692	5.46395	5.60746	8.01833	7.37428					1.02463	3.15057	4.06488					2.43794	4.46641					14.6184	16.6459	30.6605	1.05781	0.423198	0.0124348	0.0303264
nhr-206	WBGene00011097	UP-REGULATED	[jmjd-3.1]:	10.1854	10.6805	12.1421	15.8878	16.0367	18.1521					22.5419	14.7027	21.3406					13.4087	16.3769					38.9823	22.7786	22.7481	1.13812	0.344033	0.000939099	0.00328439
F58E6.8	WBGene00010257	UP-REGULATED	[jmjd-3.1]:	5.09269	0.762894	4.24974	8.41119	5.34556	20.4211					8.19705	1.05019	6.09732					3.65691	1.4888					17.8669	14.0176	15.8248	1.48527	0.457192	0.00115941	0.00394199
T08G11.3	WBGene00011630	UP-REGULATED	[jmjd-3.1]:	1.69756	7.62894	0.607105	7.47661	8.01833	6.80702					11.2709	11.5521	11.1784					13.4087	5.95522					17.8669	9.63709	10.8795	1.24543	0.441808	0.00481834	0.0134604
B0222.11	WBGene00044582	UP-REGULATED	[jmjd-3.1]:	20.3707	12.2063	28.5339	36.4485	16.0367	25.5263					28.6897	12.6023	28.4542					25.5984	41.6865					44.6672	41.1766	43.5181	0.904281	0.347233	0.00920756	0.0234604
T10H10.2	WBGene00020426	UP-REGULATED	[jmjd-3.1]:	101.854	48.8252	128.706	210.28	124.284	207.614					161.892	58.8107	98.5733					206.006	139.948					215.215	193.618	144.401	0.846821	0.331925	0.010734	0.0267
Y39G8B.10	WBGene00012729	UP-REGULATED	[jmjd-3.1]:	8.48781	12.2063	9.10658	11.2149	18.7094	17.0176					21.5173	27.305	19.3082					37.7881	10.4216					38.9823	28.9113	8.90143	1.01264	0.408447	0.0131658	0.031828
abu-12	WBGene00004127	UP-REGULATED	[jmjd-3.1]:	1006.65	624.81	975.618	1031.77	726.996	779.972					1604.57	1175.16	928.825					1535.9	1092.78					1529.24	1296.63	1154.22	0.56993	0.241581	0.0183162	0.0421914

## Sheet: J3.1&J1.2 OE-UP & require CBP-1
Gene	Wormbase Identifier	Direction	DEG overlap	EV1	EV2	EV3	cco-1_1	cco-1_2	cco-1_3	Log2 FC	lfcSE	pval	padj	sur-5::jmjd-1.2	sur-5::jmjd-1.2	sur-5::jmjd-1.2	Log2 FC	lfcSE	pval	padj	rgef-1::jmjd-1.2	rgef-1::jmjd-1.2	Log2 FC	lfcSE	pval	padj	jmjd-3.1::jmjd-3.1	jmjd-3.1::jmjd-3.1	jmjd-3.1::jmjd-3.1	Log2 FC	lfcSE	pval	padj
ZK370.8	WBGene00022722	UP-REGULATED	[cco-1 RNAi] and [jmjd-3.1] and [jmjd-1.2 neur.]:	673.932	588.954	760.703	1207.47	1045.06	1169.67	0.722689	0.200742	0.00031812	0.00357027	770.523	783.442	832.284					1676.08	978.145	0.922935	0.221794	3.16549e-05	0.000336402	1344.08	1331.67	1019.71	0.828274	0.200599	3.64338e-05	0.00018863
hsp-6	WBGene00002010	UP-REGULATED	[cco-1 RNAi] and [jmjd-3.1] and [jmjd-1.2 neur.]:	2451.28	3573.39	3607.42	6539.23	6240.94	7559.2	1.01946	0.215937	2.34555e-06	6.32698e-05	3516.54	2750.45	2843.38					6851.83	3954.27	0.703851	0.238006	0.00310369	0.0137119	6546.59	5647.33	5422.95	0.823024	0.215952	0.000138326	0.00061787
F18A12.4	WBGene00017553	UP-REGULATED	[cco-1 RNAi] and [jmjd-3.1] and [jmjd-1.2 neur.]:	61.1122	88.4957	60.1034	136.448	148.339	132.737	0.8791	0.286309	0.0021373	0.0158741	86.0691	89.2662	116.865					277.925	102.728	1.27705	0.311462	4.12867e-05	0.000414216	269.628	330.289	235.393	1.79284	0.28363	2.59759e-10	5.0585e-09
F27D9.2	WBGene00017861	UP-REGULATED	[cco-1 RNAi] and [jmjd-3.1] and [jmjd-1.2 neur.]:	91.6684	64.0831	85.6018	208.411	144.33	200.807	1.15172	0.217594	1.20333e-07	5.13647e-06	121.931	97.6678	98.5733					166.999	144.414	0.9073	0.243906	0.000199319	0.00147566	198.972	223.405	167.149	1.23128	0.216982	1.3905e-08	1.76482e-07
H28G03.1	WBGene00019249	UP-REGULATED	[cco-1 RNAi] and [jmjd-3.1] and [jmjd-1.2 neur.]:	203.707	336.436	275.019	809.343	692.25	920.083	1.46691	0.229399	1.61006e-10	1.45634e-08	378.089	369.667	304.866					780.141	437.709	1.07692	0.253242	2.11386e-05	0.000239641	785.331	714.021	636.947	1.29534	0.229492	1.65779e-08	2.06643e-07
sur-5	WBGene00006351	UP-REGULATED	[cco-1 RNAi] and [jmjd-3.1] and [jmjd-1.2 neur.]:	420.995	405.097	409.796	721.493	698.931	723.814	0.768161	0.17446	1.06729e-05	0.000229985	491.823	539.798	594.489					1270.17	814.376	1.28539	0.192853	2.6441e-11	1.98146e-09	769.9	889.24	750.688	0.930779	0.174113	9.00045e-08	9.2709e-07
clu-1	WBGene00000550	UP-REGULATED	[cco-1 RNAi] and [jmjd-3.1] and [jmjd-1.2 neur.]:	881.035	644.645	799.558	1516.82	1435.28	1443.09	0.870324	0.2157	5.46293e-05	0.000857389	857.617	1068.04	1263.16					1928.41	1051.1	0.888074	0.237902	0.000189263	0.00140906	1821.61	1686.49	1804.02	1.12934	0.215524	1.60608e-07	1.55388e-06
pde-3	WBGene00008443	UP-REGULATED	[cco-1 RNAi] and [jmjd-3.1] and [jmjd-1.2 neur.]:	37.3464	55.6913	55.2466	119.626	106.911	137.842	1.19067	0.225078	1.22281e-07	5.19046e-06	56.3547	47.2586	50.811					109.707	95.2835	0.940671	0.253884	0.000211286	0.00154633	140.499	119.149	99.8939	1.16543	0.224908	2.19739e-07	2.03871e-06
clec-17	WBGene00008477	UP-REGULATED	[cco-1 RNAi] and [jmjd-3.1] and [jmjd-1.2 neur.]:	0	1.52579	0.607105	17.757	6.68195	24.9591	2.0157	0.467915	1.6487e-05	0.000323274	10.2463	1.05019	2.03244					15.8466	2.97761	1.41667	0.477346	0.00299929	0.013343	25.1761	18.3981	12.8576	2.13058	0.467344	5.14212e-06	3.35866e-05
F34H10.3	WBGene00009380	UP-REGULATED	[cco-1 RNAi] and [jmjd-3.1] and [jmjd-1.2 neur.]:	62.8098	65.6089	77.1024	236.448	155.021	204.211	1.41762	0.246922	9.40315e-09	5.43309e-07	136.276	113.421	69.1029					145.057	107.194	0.804011	0.276549	0.00364566	0.0155552	154.305	171.715	151.324	1.11392	0.247819	6.96097e-06	4.37263e-05
cyp-14A1	WBGene00010705	UP-REGULATED	[cco-1 RNAi] and [jmjd-3.1] and [jmjd-1.2 neur.]:	15.2781	13.7321	18.2132	54.2054	56.1283	77.7135	1.67208	0.343212	1.10548e-06	3.43535e-05	26.6404	10.5019	31.5028					68.2623	29.7761	1.33508	0.374022	0.000357617	0.0023884	61.722	65.7074	41.54	1.52993	0.343703	8.53514e-06	5.21841e-05
C46C2.2	WBGene00008110	UP-REGULATED	[cco-1 RNAi] and [jmjd-3.1] and [jmjd-1.2 neur.]:	387.044	421.117	502.683	1240.18	991.601	1207.11	1.27112	0.266599	1.86143e-06	5.21886e-05	629.124	497.79	422.747					1232.38	495.772	0.888931	0.291849	0.00232018	0.0108958	1141.04	954.948	762.556	1.02604	0.266692	0.000119425	0.000541833
cpna-1	WBGene00006495	UP-REGULATED	[cco-1 RNAi] and [jmjd-3.1] and [jmjd-1.2 neur.]:	448.156	402.045	340.586	732.708	566.629	703.96	0.722608	0.199447	0.000291141	0.00331151	573.794	374.918	384.131					864.25	669.962	0.903936	0.220599	4.17391e-05	0.000416921	715.487	671.968	661.673	0.75218	0.199301	0.000160592	0.000701588
cyp-13A12	WBGene00008810	UP-REGULATED	[cco-1 RNAi] and [jmjd-3.1] and [jmjd-1.2 neur.]:	13.5805	5.34026	14.5705	85.981	82.8561	107.778	2.38024	0.395079	1.69388e-09	1.19168e-07	21.5173	8.40153	28.4542					52.4157	11.9104	1.14114	0.424956	0.00724633	0.0266511	55.2249	45.5571	25.7153	1.44608	0.398284	0.000282565	0.00115371
DC2.5	WBGene00017082	UP-REGULATED	[cco-1 RNAi] and [jmjd-3.1] and [jmjd-1.2 neur.]:	202.01	157.919	203.38	545.793	529.21	613.199	1.47227	0.248851	3.29334e-09	2.14788e-07	163.941	134.424	221.536					410.793	224.81	0.702812	0.275273	0.0106756	0.0362177	440.987	388.988	270.01	0.89664	0.249589	0.000327563	0.00131235
pcp-2	WBGene00003957	UP-REGULATED	[cco-1 RNAi] and [jmjd-3.1] and [jmjd-1.2 neur.]:	263.122	203.693	390.369	487.849	379.534	538.889	0.656788	0.254125	0.00975179	0.0497777	564.572	357.065	315.028					709.441	716.115	1.19357	0.277996	1.75898e-05	0.000204642	618.032	479.226	497.491	0.822649	0.253815	0.00119054	0.00403065
emb-8	WBGene00001262	UP-REGULATED	[cco-1 RNAi] and [jmjd-3.1] and [jmjd-1.2 neur.]:	1531.2	1354.9	1875.35	2248.59	2458.96	2656.44	0.608897	0.165899	0.000242276	0.00288077	1898.64	1732.81	1726.56					2658.57	2268.94	0.610507	0.184194	0.00091813	0.0051348	2239.86	2682.61	2045.35	0.531411	0.165897	0.0013588	0.00450636
sprr-2	WBGene00009629	UP-REGULATED	[cco-1 RNAi] and [jmjd-3.1] and [jmjd-1.2 neur.]:	6.79025	8.39183	13.3563	26.1681	29.4006	26.6608	1.19216	0.327173	0.000268623	0.00311365	27.6651	16.8031	14.2271					34.1312	43.1753	1.60463	0.352588	5.33885e-06	7.54147e-05	54.4128	50.8137	47.4743	2.01426	0.317591	2.26326e-10	4.48045e-09
T15B7.10	WBGene00020522	UP-REGULATED	[cco-1 RNAi] and [jmjd-3.1] and [jmjd-1.2 neur.]:	0	0.762894	1.82132	11.2149	9.35472	5.67252	1.46387	0.468384	0.0017758	0.0137226	3.0739	3.15057	3.04866					8.53279	7.44402	1.31856	0.477456	0.00575112	0.0221363	16.2426	2.6283	12.8576	1.68787	0.466888	0.000300165	0.00121696
R173.3	WBGene00020125	UP-REGULATED	[cco-1 RNAi] and [jmjd-3.1] and [jmjd-1.2 neur.]:	5.09269	6.10315	4.85684	13.0841	20.0458	24.3918	1.35364	0.395211	0.00061453	0.00595941	20.4926	9.45172	7.11354					20.7225	19.3545	1.36462	0.423228	0.00126278	0.00662387	50.3521	33.2918	25.7153	2.13628	0.387696	3.58431e-08	4.08993e-07
Y73B6BL.31	WBGene00022252	UP-REGULATED	[cco-1 RNAi] and [jmjd-3.1] and [jmjd-1.2 neur.]:	50.9269	37.3818	64.3532	105.607	60.1375	87.9241	0.674493	0.258242	0.00900484	0.0468467	81.9705	74.5636	91.4598					129.211	89.3283	0.999294	0.283554	0.000424807	0.00275193	138.874	145.432	119.675	1.28855	0.254296	4.03859e-07	3.51862e-06
fkh-9	WBGene00001441	UP-REGULATED	[cco-1 RNAi] and [jmjd-3.1] and [jmjd-1.2 neur.]:	147.688	259.384	290.196	483.176	596.03	527.544	1.11333	0.229403	1.21503e-06	3.74515e-05	310.463	237.343	206.293					520.5	390.067	0.887572	0.253483	0.000462637	0.00294677	581.486	526.535	553.867	1.16036	0.229229	4.14809e-07	3.60277e-06
Y75B8A.6	WBGene00013543	UP-REGULATED	[cco-1 RNAi] and [jmjd-3.1] and [jmjd-1.2 neur.]:	91.6684	110.62	143.884	376.634	217.831	368.714	1.35359	0.255629	1.18938e-07	5.0912e-06	110.66	108.17	79.2651					269.392	169.724	0.833212	0.2828	0.00321608	0.0140901	259.07	208.512	278.912	1.0067	0.256247	8.54228e-05	0.000402182
sptl-2	WBGene00018398	UP-REGULATED	[cco-1 RNAi] and [jmjd-3.1] and [jmjd-1.2 neur.]:	268.215	213.61	272.59	382.242	428.981	378.924	0.630015	0.191876	0.00102543	0.00884866	305.34	311.907	334.336					636.303	467.485	1.08002	0.211868	3.43951e-07	7.7654e-06	462.103	476.598	328.364	0.71997	0.191493	0.000170066	0.000737967
Y54G11A.7	WBGene00013216	UP-REGULATED	[cco-1 RNAi] and [jmjd-3.1] and [jmjd-1.2 neur.]:	850.479	839.946	800.165	2016.82	1829.52	2124.36	1.18401	0.230178	2.69118e-07	1.04591e-05	826.878	965.125	1032.48					2129.54	1009.41	0.854896	0.253434	0.000742873	0.00432606	1588.53	1756.58	1201.69	0.814518	0.230303	0.000405128	0.00158452
gdh-1	WBGene00014095	UP-REGULATED	[cco-1 RNAi] and [jmjd-3.1] and [jmjd-1.2 neur.]:	4695.46	10528.7	7232.44	13824.3	11959.3	14524.5	0.77677	0.257867	0.00259284	0.0184806	6841.47	8321.71	5848.34					16932.7	9631.08	0.749102	0.282178	0.00793765	0.0286653	12720.4	13951	11789.5	0.714307	0.257866	0.00560433	0.0153471
W06H3.3	WBGene00012316	UP-REGULATED	[cco-1 RNAi] and [jmjd-3.1] and [jmjd-1.2 neur.]:	417.6	380.684	448.651	702.801	628.103	664.252	0.650328	0.189158	0.000586005	0.00574883	393.459	479.937	562.986					871.564	550.858	0.73906	0.209815	0.000427614	0.00276314	700.057	692.994	715.082	0.72608	0.188937	0.000121556	0.000550753
F48G7.8	WBGene00018619	UP-REGULATED	[cco-1 RNAi] and [jmjd-3.1] and [jmjd-1.2 neur.]:	23.7659	37.3818	37.6405	67.2895	130.966	74.31	1.2051	0.33872	0.000373977	0.00406506	93.2415	61.9613	25.4055					86.5469	65.5074	0.980825	0.367527	0.00761421	0.0277119	88.5223	83.2294	69.2334	1.06319	0.339024	0.0017126	0.00551035
T07D3.6	WBGene00020309	UP-REGULATED	[cco-1 RNAi] and [jmjd-3.1] and [jmjd-1.2 neur.]:	0	0.762894	0	8.41119	4.00917	6.23977	1.57347	0.473606	0.00089271	0.00794466	5.12316	3.15057	2.03244					2.43794	8.93283	1.34495	0.47603	0.00472283	0.0189847	4.06066	5.25659	5.93429	1.35503	0.47455	0.00429826	0.0121949
adt-1	WBGene00000082	UP-REGULATED	[cco-1 RNAi] and [jmjd-3.1] and [jmjd-1.2] and [jmjd-1.2 neur.]	71.2976	57.9799	35.8192	113.084	114.929	89.6258	0.889204	0.252043	0.000418745	0.00443434	340.178	273.05	205.276	2.17078	0.247252	1.64033e-18	9.93007e-16	208.444	247.142	1.9113	0.271744	2.01477e-12	1.96096e-10	430.429	347.811	368.915	2.63038	0.245719	9.66122e-27	2.56528e-24
ugt-2	WBGene00007073	UP-REGULATED	[cco-1 RNAi] and [jmjd-3.1] and [jmjd-1.2] and [jmjd-1.2 neur.]	47.5317	44.2478	40.0689	160.747	223.177	256.398	2.09273	0.257874	4.84562e-16	1.38932e-13	153.695	111.32	143.287	1.48668	0.260817	1.19758e-08	5.70684e-07	296.21	180.145	2.22032	0.281535	3.1082e-15	5.97748e-13	283.434	313.643	206.711	2.39818	0.256857	9.9436e-21	1.35233e-18
ugt-62	WBGene00010904	UP-REGULATED	[cco-1 RNAi] and [jmjd-3.1] and [jmjd-1.2] and [jmjd-1.2 neur.]	560.196	630.913	893.052	4822.41	3798.02	4978.77	2.46209	0.267827	3.82532e-20	2.15295e-17	4501.21	2621.28	2915.53	2.06018	0.267913	1.47408e-14	3.39349e-12	4250.55	2124.52	1.98833	0.292596	1.0794e-11	8.88114e-10	4781.02	5347.71	3662.45	2.48055	0.267813	2.00222e-20	2.53736e-18
ugt-19	WBGene00019515	UP-REGULATED	[cco-1 RNAi] and [jmjd-3.1] and [jmjd-1.2] and [jmjd-1.2 neur.]	108.644	64.846	127.492	518.69	538.565	694.317	2.31378	0.271252	1.46309e-17	6.00896e-15	226.444	180.633	231.698	0.978572	0.273888	0.000353071	0.00284895	385.195	209.921	1.41764	0.298086	1.97635e-06	3.31023e-05	462.103	537.049	323.419	1.93983	0.271594	9.17402e-13	3.06313e-11
ugt-12	WBGene00020592	UP-REGULATED	[cco-1 RNAi] and [jmjd-3.1] and [jmjd-1.2] and [jmjd-1.2 neur.]	303.864	521.819	550.037	983.174	1150.63	1116.35	1.13165	0.258873	1.23427e-05	0.000257637	1137.34	1163.61	1071.1	1.18066	0.258918	5.11623e-06	9.021e-05	2257.53	1122.56	1.70339	0.282986	1.75131e-09	8.22188e-08	1868.71	2125.42	1316.42	1.78552	0.25854	4.97935e-12	1.42682e-10
apy-1	WBGene00017244	UP-REGULATED	[cco-1 RNAi] and [jmjd-3.1] and [jmjd-1.2] and [jmjd-1.2 neur.]	840.293	655.326	970.761	1457.94	1420.58	1745.43	0.848878	0.23131	0.000242679	0.0028833	2178.37	1258.13	1677.78	0.984758	0.231305	2.06823e-05	0.000277775	2420.88	1935.45	1.30494	0.254142	2.82619e-07	6.62432e-06	2719.01	2694	1776.33	1.44627	0.231045	3.85738e-10	7.18555e-09
pgp-9	WBGene00004003	UP-REGULATED	[cco-1 RNAi] and [jmjd-3.1] and [jmjd-1.2] and [jmjd-1.2 neur.]	145.99	161.733	216.737	455.139	578.656	718.141	1.58278	0.266102	2.71399e-09	1.78536e-07	412.927	286.702	237.795	0.753996	0.267523	0.00482588	0.023275	670.434	336.47	1.37363	0.291405	2.4311e-06	3.96377e-05	622.905	632.543	537.053	1.61226	0.265991	1.34987e-09	2.20729e-08
cyp-33E2	WBGene00018334	UP-REGULATED	[cco-1 RNAi] and [jmjd-3.1] and [jmjd-1.2] and [jmjd-1.2 neur.]	44.1366	42.7221	56.4608	91.5885	84.1925	121.959	0.963421	0.253049	0.000140516	0.00185033	160.867	115.521	142.271	1.40903	0.251334	2.0684e-08	9.01548e-07	177.97	123.571	1.50128	0.275654	5.14429e-08	1.52627e-06	155.929	161.202	106.817	1.42853	0.250204	1.13321e-08	1.47406e-07
K09E9.1	WBGene00010724	UP-REGULATED	[cco-1 RNAi] and [jmjd-3.1] and [jmjd-1.2] and [jmjd-1.2 neur.]	66.2049	56.4541	69.21	250.466	175.067	254.129	1.65759	0.27447	1.54825e-09	1.10457e-07	108.611	143.876	110.768	0.826328	0.277961	0.00295081	0.0157456	275.487	113.149	1.43989	0.301087	1.73298e-06	2.97439e-05	210.342	241.803	176.051	1.54945	0.27456	1.66737e-08	2.07528e-07
F25B3.5	WBGene00009102	UP-REGULATED	[cco-1 RNAi] and [jmjd-3.1] and [jmjd-1.2] and [jmjd-1.2 neur.]	13.5805	28.99	24.2842	51.4017	85.5289	80.5498	1.45955	0.281175	2.09289e-07	8.3474e-06	82.9952	53.5597	57.9245	1.31255	0.283776	3.74062e-06	6.97155e-05	45.1019	44.6641	0.84002	0.318915	0.00843878	0.030025	78.7767	75.3445	68.2443	1.49315	0.280552	1.02525e-07	1.04328e-06
cyp-13A5	WBGene00011672	UP-REGULATED	[cco-1 RNAi] and [jmjd-3.1] and [jmjd-1.2] and [jmjd-1.2 neur.]	8.48781	3.05158	6.07105	27.1027	13.3639	24.3918	1.40343	0.395248	0.000384145	0.00415183	56.3547	42.0076	43.6974	2.32626	0.389354	2.30553e-09	1.30847e-07	26.8173	26.7985	1.61808	0.419832	0.000116149	0.000956644	42.2308	53.442	13.8467	2.01571	0.390004	2.36071e-07	2.17936e-06
hrg-1	WBGene00019830	UP-REGULATED	[cco-1 RNAi] and [jmjd-3.1] and [jmjd-1.2] and [jmjd-1.2 neur.]	468.527	711.78	487.505	1230.84	1368.46	1363.11	1.16504	0.234685	6.89573e-07	2.29797e-05	910.898	993.481	832.284	0.664872	0.235131	0.00468893	0.022742	1281.14	668.473	0.755009	0.258504	0.00349259	0.0150388	1352.2	1372.85	978.169	1.07382	0.23469	4.75131e-06	3.12913e-05
ZK1290.14	WBGene00044396	UP-REGULATED	[cco-1 RNAi] and [jmjd-3.1] and [jmjd-1.2] and [jmjd-1.2 neur.]	56.0196	56.4541	50.3897	89.7193	85.5289	87.3568	0.646559	0.238557	0.00672246	0.0375752	110.66	113.421	104.671	0.949973	0.237466	6.32197e-05	0.000701987	108.488	87.8395	0.798982	0.265188	0.0025877	0.0118863	133.189	94.6187	70.2224	0.823149	0.236871	0.000510673	0.00193212
twk-7	WBGene00006662	UP-REGULATED	[cco-1 RNAi] and [jmjd-3.1] and [jmjd-1.2] and [jmjd-1.2 neur.]	23.7659	24.4126	14.5705	65.4203	56.1283	57.8597	1.33373	0.312927	2.02503e-05	0.000384194	66.6011	45.1582	29.4704	1.02543	0.316855	0.00121105	0.00772625	63.3865	75.929	1.5045	0.340063	9.68058e-06	0.000124313	108.826	94.6187	58.3538	1.82925	0.309524	3.42332e-09	5.00571e-08
cyp-33C9	WBGene00016860	UP-REGULATED	[cco-1 RNAi] and [jmjd-3.1] and [jmjd-1.2] and [jmjd-1.2 neur.]	113.737	105.279	139.027	216.822	181.749	207.614	0.699151	0.247029	0.00465134	0.0286741	236.69	169.081	183.936	0.660229	0.247653	0.00767734	0.033463	362.034	221.832	1.18049	0.27044	1.27082e-05	0.000155321	321.604	440.678	246.273	1.38309	0.245061	1.6629e-08	2.07125e-07
Y47D7A.16	WBGene00044637	UP-REGULATED	[cco-1 RNAi] and [jmjd-3.1] and [jmjd-1.2] and [jmjd-1.2 neur.]	71.2976	103.754	123.849	238.317	236.541	243.918	1.17405	0.191478	8.70613e-10	6.71565e-08	146.522	163.83	156.498	0.574903	0.195501	0.00327511	0.0171466	238.918	214.388	1.08989	0.21421	3.61993e-07	8.10397e-06	226.585	201.503	181.985	0.947085	0.19221	8.33513e-07	6.67697e-06
crtc-1	WBGene00021237	UP-REGULATED	[cco-1 RNAi] and [jmjd-3.1] and [jmjd-1.2] and [jmjd-1.2 neur.]	25.4634	28.2271	35.2121	160.747	100.229	181.521	2.08461	0.258655	7.66488e-16	2.11774e-13	142.424	109.22	107.719	1.79042	0.260871	6.73074e-12	7.71604e-10	224.291	150.369	2.37673	0.281143	2.81963e-17	7.99133e-15	229.021	210.264	219.569	2.61063	0.256528	2.51775e-24	5.19962e-22
pab-2	WBGene00003903	UP-REGULATED	[cco-1 RNAi] and [jmjd-3.1] and [jmjd-1.2] and [jmjd-1.2 neur.]	285.19	189.961	231.307	666.353	674.876	718.708	1.44355	0.238017	1.32035e-09	9.60004e-08	674.208	447.381	450.185	1.07855	0.238638	6.19563e-06	0.000105049	1293.33	687.828	1.92079	0.260879	1.80106e-13	2.26366e-11	1312.4	1088.99	1129.49	2.1722	0.23736	5.61367e-20	6.38812e-18
vhp-1	WBGene00006923	UP-REGULATED	[cco-1 RNAi] and [jmjd-3.1] and [jmjd-1.2] and [jmjd-1.2 neur.]	76.3903	64.0831	74.6739	204.672	148.339	225.199	1.34445	0.232215	7.05214e-09	4.20253e-07	126.03	126.023	94.5084	0.641922	0.236637	0.0066739	0.0300841	237.699	141.436	1.31088	0.256951	3.36679e-07	7.67725e-06	358.962	328.537	306.605	2.07667	0.229789	1.60608e-19	1.70042e-17
F40F4.6	WBGene00018237	UP-REGULATED	[cco-1 RNAi] and [jmjd-3.1] and [jmjd-1.2] and [jmjd-1.2 neur.]	1981.06	2108.64	2065.37	4110.27	4077.32	3836.89	0.921812	0.197138	2.92558e-06	7.67825e-05	6202.1	4370.89	3370.8	1.12607	0.197119	1.11257e-08	5.37015e-07	5523.15	7110.53	1.53824	0.217619	1.56636e-12	1.56264e-10	6772.36	6793.27	6125.18	1.60221	0.196996	4.18196e-16	2.58139e-14
C02B10.3	WBGene00015328	UP-REGULATED	[cco-1 RNAi] and [jmjd-3.1] and [jmjd-1.2] and [jmjd-1.2 neur.]	61.1122	76.2894	110.493	306.541	212.486	268.877	1.49078	0.26976	3.27029e-08	1.67325e-06	398.582	207.938	251.006	1.60065	0.269812	2.98414e-09	1.64783e-07	464.428	355.824	2.05657	0.293462	2.41837e-12	2.2776e-10	518.952	435.421	341.222	2.14968	0.268476	1.17562e-15	6.7813e-14
W02G9.4	WBGene00020954	UP-REGULATED	[cco-1 RNAi] and [jmjd-3.1] and [jmjd-1.2] and [jmjd-1.2 neur.]	100.156	80.8667	119.6	170.093	145.666	165.07	0.638367	0.213335	0.00276868	0.0194709	150.621	166.98	133.125	0.546166	0.214707	0.0109661	0.0442352	263.298	227.787	1.21114	0.234034	2.27871e-07	5.4696e-06	359.774	384.607	260.12	1.64971	0.209318	3.23865e-15	1.742e-13
ZK970.1	WBGene00014171	UP-REGULATED	[cco-1 RNAi] and [jmjd-3.1] and [jmjd-1.2] and [jmjd-1.2 neur.]	45.8342	47.2994	67.3887	149.532	122.948	134.439	1.23258	0.223889	3.68504e-08	1.85423e-06	134.227	116.571	98.5733	1.02071	0.226318	6.48074e-06	0.000108979	123.116	102.728	0.981873	0.251872	9.68702e-05	0.000818984	191.663	193.618	147.368	1.60171	0.221708	5.03294e-13	1.77244e-11
K08H10.6	WBGene00010698	UP-REGULATED	[cco-1 RNAi] and [jmjd-3.1] and [jmjd-1.2] and [jmjd-1.2 neur.]	23.7659	28.99	36.4263	61.682	54.7919	51.0527	0.779269	0.260998	0.00282902	0.0197449	82.9952	68.2624	49.7948	1.02729	0.260222	7.88856e-05	0.000841635	81.671	68.485	1.17358	0.285932	4.05358e-05	0.000408222	124.256	104.256	92.9705	1.66617	0.253383	4.84301e-11	1.10978e-09
ugt-16	WBGene00013901	UP-REGULATED	[cco-1 RNAi] and [jmjd-3.1] and [jmjd-1.2] and [jmjd-1.2 neur.]	98.4586	94.5988	244.663	370.092	494.464	617.17	1.43757	0.354873	5.10109e-05	0.000809655	459.035	221.59	380.066	1.03434	0.355268	0.00359759	0.0184161	1272.61	413.888	2.03579	0.379527	8.13879e-08	2.23215e-06	907.962	841.055	581.56	1.98927	0.354555	2.0162e-08	2.44044e-07
F54C1.1	WBGene00018789	UP-REGULATED	[cco-1 RNAi] and [jmjd-3.1] and [jmjd-1.2] and [jmjd-1.2 neur.]	16.9756	25.9384	17.6061	57.0092	64.1467	46.5147	1.19782	0.339167	0.000412983	0.00439474	79.9213	40.9574	50.811	1.23659	0.339895	0.000274587	0.00234073	32.9122	108.683	1.46703	0.365311	5.92377e-05	0.000555554	86.898	98.9992	92.9705	1.85023	0.335534	3.50194e-08	4.00413e-07
tpra-1	WBGene00008366	UP-REGULATED	[cco-1 RNAi] and [jmjd-3.1] and [jmjd-1.2] and [jmjd-1.2 neur.]	52.6244	34.3302	72.8526	118.691	89.5381	119.69	0.948591	0.256509	0.000217242	0.00262625	112.709	76.6639	83.33	0.694274	0.259188	0.00739189	0.0325048	108.488	114.638	0.959608	0.283842	0.000722788	0.00423692	151.869	162.078	137.478	1.37108	0.254109	6.82871e-08	7.25274e-07
fbxa-74	WBGene00021262	UP-REGULATED	[cco-1 RNAi] and [jmjd-3.1] and [jmjd-1.2] and [jmjd-1.2 neur.]	40.7415	48.8252	82.5663	200.934	122.948	153.725	1.29824	0.281057	3.85349e-06	9.72717e-05	139.35	92.4168	111.784	0.86251	0.283468	0.0023446	0.0130838	165.78	126.548	1.17267	0.308396	0.000143264	0.00112705	162.426	120.026	204.733	1.32007	0.280749	2.57693e-06	1.81962e-05
crh-1	WBGene00000793	UP-REGULATED	[cco-1 RNAi] and [jmjd-3.1] and [jmjd-1.2] and [jmjd-1.2 neur.]	135.805	204.456	105.636	228.971	264.605	249.024	0.677873	0.247356	0.00613515	0.0352342	330.956	433.729	239.828	1.08419	0.246682	1.10715e-05	0.000168967	279.144	259.052	0.788586	0.272289	0.00377782	0.0159866	365.459	305.758	296.714	1.03527	0.24634	2.63872e-05	0.000141431
nas-4	WBGene00003523	UP-REGULATED	[cco-1 RNAi] and [jmjd-3.1] and [jmjd-1.2] and [jmjd-1.2 neur.]	61.1122	61.0315	82.5663	160.747	126.957	149.755	0.990179	0.266117	0.000198564	0.00245116	193.655	112.37	114.833	0.935528	0.266981	0.000458141	0.00353056	129.211	123.571	0.794997	0.294357	0.00691743	0.0256245	142.123	192.742	101.872	0.986601	0.265861	0.000206468	0.000872891
ugt-13	WBGene00019232	UP-REGULATED	[cco-1 RNAi] and [jmjd-3.1] and [jmjd-1.2] and [jmjd-1.2 neur.]	145.99	161.733	180.917	259.812	478.427	369.281	1.07324	0.263633	4.68198e-05	0.000754479	300.217	307.706	263.201	0.756988	0.264507	0.00421141	0.0209609	302.305	361.78	0.926116	0.289397	0.00137354	0.00710446	293.991	485.359	222.536	0.94328	0.263723	0.000347846	0.00138674
F53F8.4	WBGene00010001	UP-REGULATED	[cco-1 RNAi] and [jmjd-3.1] and [jmjd-1.2] and [jmjd-1.2 neur.]	62.8098	77.8152	62.5318	78.5044	177.74	110.614	0.760223	0.261949	0.0037057	0.0242469	153.695	142.826	122.963	0.952516	0.261716	0.000273166	0.00233154	115.802	160.791	0.924587	0.28809	0.00133027	0.00691655	129.941	148.061	118.686	0.878987	0.261083	0.000760747	0.00273614
T19A5.3	WBGene00020554	UP-REGULATED	[cco-1 RNAi] and [jmjd-3.1] and [jmjd-1.2] and [jmjd-1.2 neur.]	446.459	511.139	798.95	1064.48	799.161	952.416	0.63286	0.233949	0.00682792	0.0380062	1124.02	908.415	735.743	0.608964	0.234075	0.00927955	0.0387715	1066.6	863.507	0.665838	0.257444	0.00970007	0.0335571	1249.06	907.638	966.3	0.772253	0.233787	0.00095574	0.00333284
mltn-9	WBGene00008964	UP-REGULATED	[cco-1 RNAi] and [jmjd-3.1] and [jmjd-1.2] and [jmjd-1.2 neur.]	190.127	148.764	451.686	802.801	371.516	1001.77	1.22047	0.347378	0.00044246	0.00462422	875.036	520.895	672.737	1.15682	0.347471	0.0008708	0.005901	914.228	451.108	1.12855	0.37278	0.00246676	0.0114494	601.789	600.128	692.334	1.04904	0.34742	0.00253188	0.00771602
cdr-5	WBGene00010473	UP-REGULATED	[cco-1 RNAi] and [jmjd-3.1] and [jmjd-1.2] and [jmjd-1.2 neur.]	37.3464	39.6705	62.5318	714.016	561.283	841.235	3.29411	0.3323	3.65356e-23	2.92208e-20	214.148	206.888	270.314	1.88999	0.333868	1.50578e-08	6.95255e-07	694.813	205.455	2.70158	0.358014	4.48819e-14	6.75853e-12	1051.71	1176.6	576.615	3.65146	0.33208	4.00626e-28	1.17573e-25
tag-341	WBGene00014051	UP-REGULATED	[cco-1 RNAi] and [jmjd-3.1] and [jmjd-1.2] and [jmjd-1.2 neur.]	61.1122	35.0931	52.8182	121.495	106.911	104.374	1.08482	0.246625	1.08932e-05	0.000233803	196.729	116.571	129.06	1.46974	0.245322	2.08467e-09	1.19558e-07	235.261	177.168	1.91019	0.266762	8.02997e-13	8.66043e-11	347.592	296.997	319.463	2.53005	0.240862	8.26803e-26	2.00446e-23
nhr-85	WBGene00003675	UP-REGULATED	[cco-1 RNAi] and [jmjd-3.1] and [jmjd-1.2] and [jmjd-1.2 neur.]	22.0683	19.0723	15.7847	40.1868	40.0917	43.1112	0.982957	0.303281	0.0011908	0.00998089	52.2562	70.3628	63.0056	1.50789	0.299876	4.94602e-07	1.27916e-05	120.678	72.9514	2.07555	0.321074	1.01704e-10	6.68065e-09	210.342	144.556	107.806	2.7257	0.291757	9.42182e-21	1.29187e-18
C35A5.6	WBGene00007950	UP-REGULATED	[cco-1 RNAi] and [jmjd-3.1] and [jmjd-1.2] and [jmjd-1.2 neur.]	54.322	38.9076	50.3897	95.3268	106.911	95.8656	0.989642	0.238108	3.23471e-05	0.000568262	115.783	64.0616	82.3138	0.8207	0.240764	0.000652642	0.00466234	115.802	108.683	1.14927	0.263563	1.29758e-05	0.000158227	121.82	119.149	100.883	1.18246	0.236472	5.72076e-07	4.76816e-06
M60.4	WBGene00019780	UP-REGULATED	[cco-1 RNAi] and [jmjd-3.1] and [jmjd-1.2] and [jmjd-1.2 neur.]	147.688	121.3	111.707	171.962	160.367	246.755	0.59883	0.213021	0.00493683	0.0301164	244.887	198.486	198.163	0.727707	0.213094	0.0006379	0.00457302	224.291	184.612	0.664606	0.237103	0.00506249	0.0200415	229.833	201.503	180.996	0.665235	0.212478	0.00174303	0.00560289
nhr-201	WBGene00019741	UP-REGULATED	[cco-1 RNAi] and [jmjd-3.1] and [jmjd-1.2] and [jmjd-1.2 neur.]	13.5805	21.361	24.8913	50.4671	25.3914	48.2164	0.900142	0.294542	0.00224257	0.0164947	43.0345	44.108	48.7785	0.988664	0.29558	0.000823333	0.00565199	46.3209	32.7537	0.812955	0.328577	0.0133547	0.043362	42.2308	41.1766	39.5619	0.858865	0.294621	0.00355511	0.0103642
H05C05.1	WBGene00019157	UP-REGULATED	[cco-1 RNAi] and [jmjd-3.1] and [jmjd-1.2] and [jmjd-1.2 neur.]	239.356	272.353	224.629	479.438	400.917	408.421	0.766116	0.208822	0.000243741	0.0028869	325.833	520.895	385.147	0.703597	0.209255	0.000772703	0.00535616	449.8	415.377	0.770201	0.231444	0.000875344	0.00494943	335.41	298.75	450.017	0.527488	0.209181	0.0116794	0.0287062
clec-4	WBGene00012583	UP-REGULATED	[cco-1 RNAi] and [jmjd-3.1] and [jmjd-1.2]:	234.264	106.042	199.738	535.512	386.216	648.936	1.31286	0.339765	0.000111536	0.00152832	688.553	323.459	229.666	1.02015	0.340101	0.00270386	0.0146826	287.677	200.989					700.869	511.642	332.32	1.29136	0.339724	0.00014399	0.000639072
srx-2	WBGene00005893	UP-REGULATED	[cco-1 RNAi] and [jmjd-3.1] and [jmjd-1.2]:	0	1.52579	0.607105	5.60746	6.68195	6.80702	1.31066	0.467268	0.00503245	0.0305648	16.3941	6.30115	4.06488	1.64865	0.466137	0.000404956	0.00318068	3.65691	5.95522					7.30918	8.76099	6.92334	1.49867	0.465655	0.00128905	0.00430402
spg-7	WBGene00004978	UP-REGULATED	[jmjd-3.1] and [jmjd-1.2 neur.]:	1329.19	1011.6	1160.79	1280.37	1311	1525.91					1291.04	1355.8	1433.89					2053.97	1396.5	0.544226	0.189886	0.00415611	0.0171598	1804.56	1728.54	1632.92	0.544809	0.170958	0.00143858	0.00473061
Y40D12A.2	WBGene00021503	UP-REGULATED	[jmjd-3.1] and [jmjd-1.2 neur.]:	573.776	472.994	614.998	742.054	856.625	878.106					1005.16	728.832	619.894					2082	1103.2	1.40297	0.261378	7.97939e-08	2.1922e-06	1779.38	1871.35	1382.69	1.49287	0.237862	3.46989e-10	6.52183e-09
madd-4	WBGene00009958	UP-REGULATED	[jmjd-3.1] and [jmjd-1.2 neur.]:	76.3903	65.6089	101.994	99.0651	124.284	114.018					217.222	102.919	94.5084					162.123	186.101	0.956263	0.320649	0.00286111	0.0128428	246.076	267.21	151.324	1.28861	0.292669	1.06772e-05	6.36295e-05
vha-6	WBGene00006915	UP-REGULATED	[jmjd-3.1] and [jmjd-1.2 neur.]:	2322.27	2247.49	2812.72	3393.45	2945.4	3861.28					2971.43	2067.83	2074.1					5019.72	2976.12	0.656518	0.234718	0.0051571	0.0203203	4728.23	5246.08	4576.33	0.927495	0.212799	1.30926e-05	7.60138e-05
C23H3.9	WBGene00016022	UP-REGULATED	[jmjd-3.1] and [jmjd-1.2 neur.]:	166.361	65.6089	202.773	345.793	188.431	313.123					314.562	114.471	143.287					443.705	276.918	1.07031	0.37789	0.00462115	0.0186552	553.873	536.172	342.211	1.44181	0.352139	4.23206e-05	0.000214983
F09A5.2	WBGene00008599	UP-REGULATED	[jmjd-3.1] and [jmjd-1.2 neur.]:	15.2781	16.7837	16.9989	13.0841	25.3914	17.5848					36.8867	28.3552	24.3893					31.6932	43.1753	1.00204	0.337001	0.00294532	0.0131559	38.9823	42.0527	41.54	1.15548	0.301668	0.000127981	0.000576122
acr-15	WBGene00000054	UP-REGULATED	[jmjd-3.1] and [jmjd-1.2 neur.]:	59.4147	54.1655	50.3897	73.8315	69.4922	63.5322					86.0691	59.8609	70.1192					84.109	102.728	0.714687	0.273337	0.00893116	0.0313938	116.947	102.504	66.2662	0.76179	0.24423	0.00181373	0.00580448
nhr-31	WBGene00003625	UP-REGULATED	[jmjd-3.1] and [jmjd-1.2 neur.]:	407.415	353.22	383.69	464.484	483.773	469.117					465.183	429.528	442.056					708.222	427.287	0.553548	0.202337	0.00622346	0.0235791	630.214	558.951	518.261	0.55889	0.181609	0.00208787	0.0065438
galt-1	WBGene00019763	UP-REGULATED	[jmjd-3.1] and [jmjd-1.2 neur.]:	32.2537	22.8868	47.3542	52.3363	77.5106	65.234					48.1577	28.3552	39.6326					103.612	46.153	0.949142	0.352109	0.00702635	0.0259858	86.898	80.6011	50.4415	0.932116	0.323256	0.00393258	0.0112799
folt-1	WBGene00007388	UP-REGULATED	[jmjd-3.1] and [jmjd-1.2 neur.]:	67.9025	18.3095	46.7471	96.2614	61.4739	98.1346					65.5764	55.6601	57.9245					119.459	56.5746	0.86943	0.359484	0.0155826	0.0488818	106.389	79.725	85.0581	0.916858	0.331106	0.00562156	0.0153823
plc-3	WBGene00004038	UP-REGULATED	[jmjd-3.1] and [jmjd-1.2 neur.]:	101.854	122.063	132.349	128.972	134.975	148.62					144.473	134.424	122.963					220.634	160.791	0.638399	0.206095	0.00195098	0.00946553	241.203	237.423	253.196	0.981315	0.181052	5.95791e-08	6.42579e-07
pcp-4	WBGene00003959	UP-REGULATED	[jmjd-3.1] and [jmjd-1.2 neur.]:	193.522	203.693	232.521	341.12	273.96	338.082					427.271	253.096	219.503					563.164	416.865	1.12945	0.252942	7.99755e-06	0.000105241	473.472	430.165	428.258	1.00949	0.229496	1.0889e-05	6.47531e-05
T25B6.2	WBGene00020788	UP-REGULATED	[jmjd-3.1] and [jmjd-1.2 neur.]:	685.815	507.324	767.381	877.567	1050.4	1005.74					841.223	1208.77	1097.52					3882.42	1735.95	1.8978	0.285425	2.95023e-11	2.14052e-09	2658.92	2644.94	1806.99	1.70707	0.261019	6.15091e-11	1.37007e-09
R193.2	WBGene00020128	UP-REGULATED	[jmjd-3.1] and [jmjd-1.2 neur.]:	2186.46	1864.51	2883.14	2992.51	3765.94	3660.48					3140.5	2334.57	2526.32					7096.85	3817.3	1.1487	0.249687	4.21311e-06	6.20599e-05	5334.08	5370.49	4853.26	1.09536	0.226976	1.39376e-06	1.05449e-05
C15C8.3	WBGene00007605	UP-REGULATED	[jmjd-3.1] and [jmjd-1.2 neur.]:	12363.3	8632.91	12415.3	15657.9	13937.2	14951.1					14219.8	13205.1	13969					28433.7	18638.3	1.01243	0.232053	1.28324e-05	0.000156599	24815.5	26160.3	16804.9	0.968399	0.210479	4.20597e-06	2.80644e-05
Y102A11A.3	WBGene00022413	UP-REGULATED	[jmjd-3.1] and [jmjd-1.2 neur.]:	426.088	286.848	280.483	232.71	343.452	211.018					356.572	296.154	336.369					880.097	378.156	0.834473	0.291843	0.00424542	0.0174428	795.076	703.507	770.469	1.09837	0.26636	3.72941e-05	0.000192489
C34H4.2	WBGene00016425	UP-REGULATED	[jmjd-3.1] and [jmjd-1.2 neur.]:	334.42	354.746	417.688	393.457	589.348	471.386					670.109	467.335	400.391					693.594	528.526	0.680371	0.237987	0.0042517	0.0174641	712.239	718.401	646.837	0.856449	0.214941	6.75975e-05	0.000324468
C17H12.6	WBGene00015932	UP-REGULATED	[jmjd-3.1] and [jmjd-1.2 neur.]:	8.48781	5.34026	12.7492	14.9532	10.6911	15.8831					6.14779	21.0038	13.2109					20.7225	26.7985	1.06259	0.40462	0.00863562	0.03055	30.861	29.7874	29.6714	1.40985	0.370033	0.000138924	0.000619383
F21F8.11	WBGene00017681	UP-REGULATED	[jmjd-3.1] and [jmjd-1.2 neur.]:	98.4586	94.5988	122.635	141.121	173.731	141.813					164.966	101.869	114.833					165.78	184.612	0.676995	0.241889	0.00512948	0.0202365	195.724	206.759	160.226	0.780847	0.216115	0.000302539	0.0012251
H20E11.1	WBGene00019213	UP-REGULATED	[jmjd-3.1] and [jmjd-1.2 neur.]:	74.6927	70.9491	132.349	140.186	112.257	123.661					159.843	87.1658	136.173					213.32	198.011	1.02378	0.279612	0.000250818	0.00178457	172.984	162.954	177.04	0.795306	0.254393	0.00177026	0.00568276
dct-17	WBGene00009431	UP-REGULATED	[jmjd-3.1] and [jmjd-1.2 neur.]:	118.829	120.537	149.348	95.3268	89.5381	69.2048					183.409	199.536	109.752					253.546	390.067	1.18752	0.264542	7.15684e-06	9.59173e-05	188.414	205.883	219.569	0.606703	0.241526	0.0120063	0.0294229
B0252.1	WBGene00015087	UP-REGULATED	[jmjd-3.1] and [jmjd-1.2 neur.]:	52.6244	38.9076	61.3176	57.0092	69.4922	60.696					58.404	57.7605	59.957					107.269	74.4402	0.758344	0.283633	0.00750249	0.0274541	117.759	84.1055	71.2115	0.775166	0.25455	0.00232497	0.00717965
cyp-13A6	WBGene00011673	UP-REGULATED	[jmjd-3.1] and [jmjd-1.2] and [jmjd-1.2 neur.]:	11.8829	3.05158	5.46395	6.54203	4.00917	12.4795					764.375	138.625	499.98	3.38578	0.456731	1.23391e-13	2.34515e-11	598.514	203.966	3.07883	0.467836	4.67272e-11	3.30026e-09	540.067	503.757	260.12	3.30789	0.456702	4.38889e-13	1.55875e-11
suro-1	WBGene00011235	UP-REGULATED	[jmjd-3.1] and [jmjd-1.2] and [jmjd-1.2 neur.]:	536.43	366.189	550.644	677.568	692.25	602.422					1481.62	898.963	944.068	1.12266	0.226863	7.47323e-07	1.83408e-05	1106.83	1156.8	1.14249	0.249687	4.74625e-06	6.83752e-05	1926.37	1419.28	1297.63	1.57721	0.22645	3.28521e-12	9.86626e-11
Y113G7B.12	WBGene00013762	UP-REGULATED	[jmjd-3.1] and [jmjd-1.2] and [jmjd-1.2 neur.]:	100.156	98.4133	83.7805	69.1586	110.92	66.3685					173.163	189.034	201.212	0.955286	0.209548	5.14485e-06	9.0617e-05	131.649	169.724	0.644057	0.235741	0.00629403	0.0237813	207.093	222.529	223.525	1.15938	0.20766	2.36324e-08	2.80769e-07
Y105C5B.15	WBGene00013654	UP-REGULATED	[jmjd-3.1] and [jmjd-1.2] and [jmjd-1.2 neur.]:	164.664	196.064	191.845	265.42	247.232	293.269					541.006	347.613	366.855	1.09075	0.248949	1.17904e-05	0.000177617	280.363	610.41	1.15855	0.273155	2.22187e-05	0.000249582	440.987	518.65	507.382	1.29981	0.248304	1.65189e-07	1.59289e-06
T28F3.5	WBGene00012131	UP-REGULATED	[jmjd-3.1] and [jmjd-1.2] and [jmjd-1.2 neur.]:	27.161	12.9692	29.1411	43.9251	42.7644	36.3041					87.0937	53.5597	67.0705	1.39755	0.310256	6.65331e-06	0.000111651	67.0434	35.7313	1.01579	0.342249	0.00299772	0.0133427	82.0252	77.0967	55.3867	1.44326	0.30853	2.89885e-06	2.00795e-05
col-156	WBGene00000729	UP-REGULATED	[jmjd-3.1] and [jmjd-1.2] and [jmjd-1.2 neur.]:	892.918	1206.9	796.522	695.325	1424.59	858.82					4006.31	2963.64	1912.53	1.4648	0.278364	1.42352e-07	4.59329e-06	2023.49	2127.5	0.987785	0.303625	0.0011407	0.00610181	3144.57	2567.85	2052.27	1.28826	0.278357	3.6909e-06	2.50269e-05
sulp-8	WBGene00013963	UP-REGULATED	[jmjd-3.1] and [jmjd-1.2] and [jmjd-1.2 neur.]:	25.4634	25.9384	36.4263	57.9437	29.4006	48.2164					67.6257	45.1582	48.7785	0.751152	0.301347	0.0126795	0.0495212	78.0141	52.1082	0.986351	0.327668	0.00261062	0.0119538	101.516	74.4684	60.3319	1.25166	0.295853	2.32977e-05	0.000126822
C36B7.5	WBGene00016468	UP-REGULATED	[jmjd-3.1] and [jmjd-1.2] and [jmjd-1.2 neur.]:	11.8829	18.3095	21.8558	23.3644	40.0917	36.3041					82.9952	39.9073	27.4379	1.19011	0.368639	0.00124485	0.0079052	32.9122	84.8619	1.34131	0.393707	0.000657094	0.00393123	59.2856	82.3533	57.3648	1.53415	0.365765	2.73637e-05	0.000146056
T01D3.6	WBGene00011330	UP-REGULATED	[jmjd-3.1] and [jmjd-1.2] and [jmjd-1.2 neur.]:	1246.01	1380.07	1509.87	1651.4	1437.95	1499.81					3000.12	2319.87	1633.07	0.710021	0.210286	0.000734266	0.00514868	2375.77	2163.23	0.67631	0.232018	0.00355803	0.0152342	2664.6	3026.92	2083.92	0.863383	0.210154	3.98506e-05	0.000204302
C29F4.2	WBGene00007808	UP-REGULATED	[jmjd-3.1] and [jmjd-1.2] and [jmjd-1.2 neur.]:	98.4586	60.2686	71.6384	67.2895	100.229	83.9533					163.941	101.869	122.963	0.733271	0.237019	0.00197664	0.0114244	175.532	190.567	1.18182	0.258979	5.03387e-06	7.19344e-05	151.056	161.202	131.543	0.913832	0.234885	0.00010002	0.000463729
Y32F6A.4	WBGene00012529	UP-REGULATED	[jmjd-3.1] and [jmjd-1.2] and [jmjd-1.2 neur.]:	493.991	308.209	473.542	599.998	542.574	585.404					610.681	668.972	630.056	0.559937	0.197494	0.00457955	0.0223575	898.381	632.742	0.809067	0.218218	0.000209229	0.00153338	691.124	799.878	655.739	0.721609	0.196957	0.000248521	0.00102826
ncx-7	WBGene00003572	UP-REGULATED	[jmjd-3.1] and [jmjd-1.2] and [jmjd-1.2 neur.]:	263.122	147.239	222.201	283.177	244.559	292.135					314.562	286.702	337.385	0.551045	0.213188	0.0097438	0.04034	453.457	326.048	0.844855	0.23499	0.00032405	0.00220293	397.944	333.794	334.298	0.725891	0.212176	0.000623497	0.00230138
T19D12.1	WBGene00020576	UP-REGULATED	[jmjd-3.1] and [jmjd-1.2] and [jmjd-1.2 neur.]:	444.761	352.457	511.183	584.11	740.36	550.802					1294.11	892.662	812.976	1.12849	0.218991	2.5615e-07	7.39609e-06	1728.5	1199.98	1.63219	0.24074	1.20253e-11	9.79327e-10	1488.64	1334.3	1400.49	1.59579	0.218502	2.80752e-13	1.04831e-11
T21C9.9	WBGene00011895	UP-REGULATED	[jmjd-3.1] and [jmjd-1.2] and [jmjd-1.2 neur.]:	315.747	289.137	211.88	309.345	469.073	304.047					835.075	522.995	380.066	1.00397	0.261834	0.00012589	0.00125238	470.523	579.145	0.863906	0.286939	0.00260588	0.0119495	610.723	692.994	560.79	1.09756	0.261513	2.70506e-05	0.000144662
ttr-14	WBGene00011460	UP-REGULATED	[jmjd-3.1] and [jmjd-1.2] and [jmjd-1.2 neur.]:	1480.27	1308.36	1273.71	1014.02	2004.58	930.293					3866.96	3423.62	1743.83	0.971617	0.346477	0.00504297	0.0240945	1445.7	5102.13	1.04096	0.371663	0.00509729	0.0201443	2335.69	3877.61	2820.77	0.971592	0.346453	0.0050411	0.0139963
T06D8.1	WBGene00011522	UP-REGULATED	[jmjd-3.1] and [jmjd-1.2] and [jmjd-1.2 neur.]:	205.405	173.177	216.737	328.036	390.226	312.556					1041.03	834.902	788.586	1.92327	0.29142	4.12062e-11	3.80517e-09	2175.86	982.611	2.62708	0.316246	9.80692e-17	2.33639e-14	2582.58	1845.94	1033.56	2.86016	0.290923	8.25084e-23	1.4683e-20
C04E12.4	WBGene00015434	UP-REGULATED	[jmjd-3.1] and [jmjd-1.2] and [jmjd-1.2 neur.]:	66.2049	91.5473	86.2089	77.5698	118.939	112.883					223.37	186.934	164.628	1.14958	0.20504	2.06313e-08	9.01548e-07	284.02	275.429	1.65677	0.223987	1.39577e-13	1.79959e-11	259.882	262.83	265.065	1.5858	0.202281	4.52133e-15	2.35616e-13
K10B2.2	WBGene00019605	UP-REGULATED	[jmjd-3.1] and [jmjd-1.2] and [jmjd-1.2 neur.]:	422.693	396.705	556.108	751.399	760.405	757.282					1111.73	663.721	723.548	0.787902	0.259659	0.00241039	0.013387	1844.3	954.324	1.45759	0.283647	2.76557e-07	6.52054e-06	1720.09	1998.38	1214.55	1.69301	0.259031	6.32143e-11	1.40059e-09
clec-160	WBGene00017322	UP-REGULATED	[jmjd-3.1] and [jmjd-1.2] and [jmjd-1.2 neur.]:	162.966	144.95	209.451	205.607	200.458	195.135					468.257	377.019	368.888	1.15897	0.213313	5.53619e-08	2.01535e-06	440.048	400.489	1.20013	0.235533	3.48087e-07	7.83876e-06	419.06	601.004	364.959	1.34044	0.212509	2.83269e-10	5.45913e-09
C40H1.8	WBGene00008043	UP-REGULATED	[jmjd-3.1] and [jmjd-1.2] and [jmjd-1.2 neur.]:	110.342	105.279	194.881	262.616	181.749	224.632					281.774	277.25	349.58	0.983554	0.320165	0.00212614	0.0120949	817.929	247.142	1.65855	0.345129	1.54301e-06	2.69764e-05	525.449	471.341	337.265	1.47025	0.319361	4.14968e-06	2.77331e-05
K10C2.1	WBGene00019617	UP-REGULATED	[jmjd-3.1] and [jmjd-1.2] and [jmjd-1.2 neur.]:	2464.86	1657.77	2843.68	2882.23	2894.62	3278.72					5813.76	3099.11	3243.77	0.737431	0.260383	0.0046243	0.0225087	6600.72	3942.36	1.07022	0.284762	0.000171065	0.0012984	5758.01	5324.93	4409.18	1.05949	0.260309	4.69854e-05	0.000236099
F54E2.1	WBGene00018823	UP-REGULATED	[jmjd-3.1] and [jmjd-1.2] and [jmjd-1.2 neur.]:	614.518	783.492	1038.15	1098.13	1030.36	1220.16					1888.4	1971.21	1118.86	0.963886	0.229009	2.56558e-05	0.000330974	2291.66	1777.63	1.22505	0.251746	1.13754e-06	2.07277e-05	1474.02	1681.23	1503.35	0.873913	0.228951	0.000135066	0.000605085
C13E3.1	WBGene00015740	UP-REGULATED	[jmjd-3.1] and [jmjd-1.2] and [jmjd-1.2 neur.]:	45.8342	35.0931	23.07	18.6915	32.0733	24.3918					92.2169	48.3088	54.8759	0.860753	0.294313	0.00344882	0.017822	67.0434	68.485	0.887506	0.322639	0.0059456	0.0227607	69.8433	77.0967	64.2881	0.964715	0.291883	0.000949271	0.00331304
K03B8.6	WBGene00010524	UP-REGULATED	[jmjd-3.1] and [jmjd-1.2] and [jmjd-1.2 neur.]:	225.776	252.518	386.119	434.578	340.779	440.188					627.075	549.25	382.099	0.783631	0.24069	0.00113084	0.00732603	772.827	530.015	1.07438	0.264077	4.73289e-05	0.00046234	551.437	505.509	437.159	0.727378	0.240473	0.00248818	0.00760085
fbxa-60	WBGene00020456	UP-REGULATED	[jmjd-3.1] and [jmjd-1.2] and [jmjd-1.2 neur.]:	120.527	105.279	110.493	132.71	125.621	114.018					199.803	208.988	173.774	0.775888	0.173028	7.31975e-06	0.000120756	160.904	160.791	0.510255	0.19736	0.00972652	0.0336268	146.184	165.583	168.138	0.503803	0.173442	0.00367564	0.010671
F59E11.5	WBGene00019111	UP-REGULATED	[jmjd-3.1] and [jmjd-1.2] and [jmjd-1.2 neur.]:	178.244	174.703	226.45	202.803	257.923	263.205					462.109	344.463	330.271	0.919992	0.201543	5.00135e-06	8.87591e-05	369.348	393.044	0.918474	0.223407	3.93588e-05	0.000398633	287.494	339.05	245.284	0.555017	0.201993	0.00600125	0.0162336
mpz-1	WBGene00003404	UP-REGULATED	[jmjd-3.1] and [jmjd-1.2] and [jmjd-1.2 neur.]:	241.054	186.146	190.631	179.439	200.458	152.024					448.789	249.945	276.412	0.628402	0.221654	0.00458166	0.0223611	550.975	436.22	1.18483	0.243096	1.09403e-06	2.01418e-05	713.863	714.021	722.994	1.70949	0.21932	6.4665e-15	3.308e-13
glt-5	WBGene00001623	UP-REGULATED	[jmjd-3.1] and [jmjd-1.2] and [jmjd-1.2 neur.]:	5.09269	12.9692	16.9989	24.299	28.0642	26.6608					42.0099	23.1042	24.3893	1.00196	0.360537	0.00545132	0.025604	35.3501	32.7537	1.14457	0.387127	0.00311082	0.0137358	54.4128	64.8313	25.7153	1.60966	0.353379	5.23742e-06	3.41566e-05
fkb-4	WBGene00001429	UP-REGULATED	[jmjd-3.1] and [jmjd-1.2] and [jmjd-1.2 neur.]:	227.473	110.62	163.918	157.009	96.22	153.725					441.616	261.498	315.028	0.934923	0.279897	0.000837066	0.00572223	358.377	279.895	0.839458	0.30588	0.00606206	0.0231268	473.472	347.811	274.955	1.0331	0.279402	0.000217694	0.000914282
C02B8.3	WBGene00015322	UP-REGULATED	[jmjd-3.1] and [jmjd-1.2] and [jmjd-1.2 neur.]:	8.48781	6.10315	18.2132	25.2336	17.3731	27.7954					54.3055	19.9536	23.3731	1.17698	0.386179	0.00230559	0.0129191	40.226	20.8433	1.08594	0.412832	0.00852706	0.0302801	39.7944	29.7874	32.6386	1.23442	0.384163	0.00131237	0.0043723
clec-66	WBGene00009397	UP-REGULATED	[jmjd-3.1] and [jmjd-1.2]:	407.415	402.045	490.541	590.652	439.672	517.334					1172.18	824.4	623.959	0.946543	0.230857	4.12931e-05	0.00049122	655.806	465.996					953.442	991.744	737.83	0.978908	0.230643	2.19324e-05	0.00012029
pes-8	WBGene00003981	UP-REGULATED	[jmjd-3.1] and [jmjd-1.2]:	712.976	656.852	911.265	1203.73	1050.4	1002.9					1553.34	1265.48	859.722	0.649777	0.218217	0.00290456	0.0155401	947.14	1156.8					1189.77	1302.76	965.311	0.565635	0.218129	0.00951106	0.0241099
W07A12.4	WBGene00012322	UP-REGULATED	[jmjd-3.1] and [jmjd-1.2]:	8.48781	5.34026	7.89237	20.5607	21.3822	10.7778					28.6897	19.9536	16.2595	1.26266	0.379179	0.000868494	0.00589516	17.0656	8.93283					18.679	21.9025	22.7481	1.2333	0.376792	0.00106356	0.00365699
C07A9.9	WBGene00007405	UP-REGULATED	[jmjd-3.1] and [jmjd-1.2]:	69.6001	57.9799	50.9968	42.9905	57.4647	48.2164					195.705	178.532	165.644	1.52293	0.234186	7.86977e-11	6.77007e-09	58.5106	95.2835					116.135	111.265	78.1348	0.750268	0.237427	0.00157772	0.00513866
dct-5	WBGene00017218	UP-REGULATED	[jmjd-3.1] and [jmjd-1.2]:	120.527	144.187	123.242	103.738	216.495	114.018					425.222	187.984	169.709	0.889478	0.310944	0.00422873	0.0210151	140.182	215.877					227.397	240.927	212.645	0.711429	0.310889	0.0221158	0.0494523
