# Supplementary material for: A conserved role of CBP/p300 in mitochondrial stress response and longevity
Source: Research Square preprint supplement (doi:10.21203/rs.3.rs-86465/v1), 2020-10-14
Supplement: Supplementary file 2 [file 54e27c09ef4edb9d3e2b44fe.xlsx]

## Sheet: Key notes
Supplementary Table 1. RNA-seq results for worms fed with cco-1, mrps-5, cbp-1, atfs-1 RNAi
Gene ID	Wormbase Gene ID
Symbol	Gene name
X_1	Normalized counts for given Condition_X (see below), replicate 1 of 3
X_2	Normalized counts for given Condition_X (see below), replicate 2 of 3
X_3	Normalized counts for given Condition_X (see below), replicate 3 of 3
X_logFC	Log2 fold change for given Condition_X (see below) relatively to Condition_ev
X_P-value	P-value for the comparasion of Condition_X (see below) versus Condition_ev (Limma-Voom)
Adjust_P-value	Benjamini-Hochberg adjusted P-value
cbp-1.effect.in.cco-1_logFC	Log2 fold change for Condition_cco-1+cbp-1 relatively to Condition_cco-1
atfs-1.effect.in.cco-1_logFC	Log2 fold change for Condition_atfs-1+cbp-1 relatively to Condition_cco-1
CBP-1_dependency	Fold change for the cbp-1.effect.in.cco-1_logFC relatively to cco-1_logFC
ATFS-1_dependency	Fold change for the atfs-1.effect.in.cco-1_logFC relatively to cco-1_logFC
Treatment Conditions:
ev	Worms grown on empty vector (ev) RNAi (100%) bacteria
cbp-1	Worms grown on cbp-1 RNAi (25%) bacteria + ev RNAi (75%) bacteria
atfs-1	Worms grown on atfs-1 RNAi (50%) bacteria + ev RNAi (50%) bacteria
cco-1+ev	Worms grown on cco-1 RNAi (50%) bacteria + ev RNAi (50%) bacteria
cco-1+cbp-1	Worms grown on cco-1 RNAi (50%) bacteria + cbp-1 RNAi (25%) bacteria + ev RNAi (25%) bacteria
cco-1+atfs-1	Worms grown on cco-1 RNAi (50%) bacteria + atfs-1 RNAi (50%) bacteria
mrps-5+ev	Worms grown on mrps-5 RNAi (50%) bacteria + ev RNAi (50%) bacteria
mrps-5+cbp-1	Worms grown on mrps-5 RNAi (50%) bacteria + cbp-1 RNAi (25%) bacteria + ev RNAi (25%) bacteria
mrps-5+atfs-1	Worms grown on mrps-5 RNAi (50%) bacteria + atfs-1 RNAi (50%) bacteria

## Sheet: All genes
Gene ID	Symbol	ev_1	ev_2	ev_3	cbp-1_1	cbp-1_2	cbp-1_3	atfs-1_1	atfs-1_2	atfs-1_3	cco-1+ev_1	cco-1+ev_2	cco-1+ev_3	cco-1+cbp-1_1	cco-1+cbp-1_2	cco-1+cbp-1_3	cco-1+atfs-1_1	cco-1+atfs-1_2	cco-1+atfs-1_3	mrps-5+ev_1	mrps-5+ev_2	mrps-5+ev_3	mrps-5+cbp-1_1	mrps-5+cbp-1_2	mrps-5+cbp-1_3	mrps-5+atfs-1_1	mrps-5+atfs-1_2	mrps-5+atfs-1_3	Gene ID	cbp-1_logFC	atfs-1_logFC	cco-1_logFC	cco-1+cbp-1_logFC	cco-1+atfs-1_logFC	mrps-5_logFC	mrps-5+cbp-1_logFC	mrps-5+atfs-1_logFC	cbp-1_P.Value	cbp-1_adj.P.Val	atfs-1_P.Value	atfs-1_adj.P.Val	cco-1_P.Value	cco-1_adj.P.Val	mrps-5_P.Value	mrps-5_adj.P.Val	cbp-1.effect.in.cco-1_logFC	cbp-1.effect.in.cco-1_P.Value	cbp-1.effect.in.cco-1 _adj.P.Val	CBP-1_dependency
WBGene00000002	aat-1	14.0527	14.0026	14.3356	6.70522	6.83326	7.35737	13.1912	14.9347	14.9146	7.20659	8.38448	6.9541	6.60359	6.84054	7.20357	6.2276	6.15075	5.20544	11.0273	10.589	10.8016	8.28671	8.72148	8.62937	8.69531	8.91461	7.90221	aat-1	-1.02783	0.0176846	-0.922877	-1.04375	-1.28727	-0.387236	-0.729798	-0.735556	5.76345e-14	9.27653e-13	0.773894	0.891935	7.11811e-13	2.55942e-11	2.38274e-06	2.93483e-05	-0.120873	0.15054	0.243362	0.130974
WBGene00000003	aat-2	12.5907	13.3595	13.221	4.54641	4.91835	4.50388	10.686	13.4618	12.6981	15.227	13.3614	13.5146	5.80934	5.72331	6.55928	13.4543	13.2946	13.2852	11.2076	10.3388	11.0778	5.42136	5.55334	5.79407	12.3317	12.4829	12.3818	aat-2	-1.49243	-0.0952277	0.101556	-1.12152	0.0324355	-0.261077	-1.22936	-0.0728501	6.9937e-16	1.57945e-14	0.160218	0.38295	0.13269	0.223225	0.000701792	0.00336129	-1.22308	5.4857e-15	1.54409e-13	-12.0434
WBGene00000004	aat-3	19.6087	18.4884	20.4984	12.7641	12.907	13.0532	19.4352	18.973	19.0388	20.0977	18.7552	19.4479	16.8541	17.5819	16.6858	20.503	19.8024	20.864	18.1048	19.0411	19.9362	16.612	18.2921	15.8637	19.8829	19.395	18.9985	aat-3	-0.597639	-0.0284037	-0.00771572	-0.196169	0.0619932	-0.0409101	-0.2046	-0.00801809	1.66154e-11	1.81942e-10	0.576106	0.77177	0.881062	0.921771	0.427273	0.570804	-0.188454	0.00128457	0.00415286	24.4246
WBGene00000005	aat-4	14.0287	15.7458	15.5653	7.62266	6.76822	7.21725	14.4089	15.7784	16.0406	8.71968	9.28782	8.25755	5.93655	5.45026	6.30804	6.321	6.58294	7.0166	11.9888	12.6693	13.3547	8.54553	8.45043	8.44856	10.903	11.0595	12.1397	aat-4	-1.06441	0.0292958	-0.788864	-1.36082	-1.18017	-0.254103	-0.830335	-0.409318	1.90869e-14	3.37558e-13	0.62777	0.809013	8.36511e-12	2.53096e-10	0.000378139	0.00198104	-0.571952	1.66183e-07	1.22813e-06	0.725033
WBGene00000006	aat-5	6.76118	8.18251	7.73924	6.3587	6.71918	5.63114	7.32778	7.81848	7.57936	7.16882	7.46453	9.2503	6.71341	7.29573	6.06161	7.59268	7.87408	7.11215	7.52851	6.75641	7.71884	6.38265	7.05901	6.12695	6.20662	6.52541	6.96946	aat-5	-0.26914	0.0119585	0.082972	-0.166114	-0.000221051	-0.0327185	-0.199271	-0.195276	0.00897276	0.0189206	0.895771	0.953355	0.373087	0.498723	0.725334	0.820215	-0.249086	0.013886	0.0330715	-3.00205
WBGene00000007	aat-6	10.9502	10.9719	11.2413	5.90034	6.36966	5.29685	11.1835	12.2784	11.6659	13.6253	13.4618	13.7129	5.90764	7.00779	6.70522	11.9468	13.4144	12.7984	12.9108	13.1294	11.8242	5.31344	4.79015	5.59255	10.9347	12.8485	10.6589	aat-6	-0.918843	0.0821473	0.299393	-0.760274	0.204934	0.190041	-1.08626	0.0513378	2.55503e-11	2.71895e-10	0.256728	0.50215	0.000208054	0.000913365	0.0118771	0.0349788	-1.05967	2.35372e-13	4.96081e-12	-3.53939
WBGene00000008	aat-7	1.41213	1.86386	1.53179	0.160002	0.204483	0.0899412	1.76935	2.2947	1.42184	0.609498	0.833198	1.00214	0.175358	0.140385	0.252514	0.427577	0.284702	0.413184	1.51896	1.60137	1.80885	0.204483	0.234285	0.26335	1.15263	0.636929	0.942246	aat-7	-3.46231	0.193206	-0.973609	-3.12216	-2.10843	0.0468846	-2.77705	-0.844226	5.52212e-07	2.89474e-06	0.271084	0.51855	0.000358831	0.00146184	0.794352	0.869611	-2.14855	4.60974e-05	0.000210567	2.20679
WBGene00000009	aat-8	0.760427	1.00337	0.754237	0.514968	0.567005	0.567005	0.573975	0.781823	0.934651	0.513777	0.274186	0.409693	0.482202	0.367495	0.628795	0.27634	0.314909	0.240311	0.669264	0.867561	0.37194	0.377175	0.447775	0.306282	0.479036	0.412165	0.729335	aat-8	-0.603847	-0.157758	-1.11122	-0.804663	-1.61336	-0.473252	-1.15393	-0.671993	0.0355248	0.0628973	0.517961	0.731293	0.00201007	0.00654093	0.0848899	0.170746	0.306559	0.374119	0.494997	-0.275875
WBGene00000010	aat-9	47.7261	46.6281	45.9023	44.815	45.4738	50.1721	47.7261	51.7733	54.0054	49.6263	50.7437	54.1424	56.171	54.1302	55.0252	51.7579	52.7427	49.9971	49.5547	53.7058	51.3464	57.6836	58.523	53.794	56.5644	54.9789	55.4732	aat-9	-0.00186359	0.126554	0.140065	0.236843	0.138133	0.137668	0.278802	0.251635	0.969089	0.977703	0.0115054	0.074989	0.00626722	0.0174652	0.00675243	0.0220431	0.0967779	0.04806	0.0953786	0.690951
WBGene00000012	abf-1	1.25092	1.40723	0.851439	0.269248	0.401299	0.308848	1.11448	0.746402	0.826967	0.275204	0.833198	0.227103	0.513777	0.115381	0.484815	0.664084	0.439527	0.567005	0.355563	0.746979	0.34017	0.559924	0.481012	0.467086	0.439527	0.573975	0.559924	abf-1	-1.88449	-0.37506	-1.68066	-1.9716	-1.095	-1.40752	-1.21742	-1.15613	0.000311088	0.000930692	0.198317	0.432699	0.000674474	0.00252122	0.00124776	0.00541475	-0.290932	0.558435	0.669544	0.173105
WBGene00000013	abf-2	0.609498	0.924219	0.819985	1.86496	1.74662	2.21743	0.610753	0.571235	0.826967	0.204483	0.470739	0.536143	1.50479	1.37319	1.27491	0.589691	0.476665	0.598681	0.819985	1.02501	0.883744	1.40723	2.02341	2.2231	1.00788	0.741324	0.876408	abf-2	1.34587	-0.228978	-1.04116	0.862964	-0.483475	0.233418	1.26824	0.181438	1.28451e-06	6.27514e-06	0.381672	0.625448	0.00444255	0.0130415	0.338038	0.4816	1.90413	5.80037e-06	3.20506e-05	-1.82885
WBGene00000015	abf-4	0.0808829	0.0557608	0.12278	0.269248	0.401299	0.45035	0.178866	0.176446	0.0899412	0.049777	0.112896	0.127199	0.376178	0.443556	0.571235	0.204483	0.165854	0.0468966	0.204483	0.174276	0.0888273	0.44916	0.481012	0.176446	0.049777	0.0162814	0.142487	abf-4	2.12197	0.795506	0.129204	2.45831	0.439127	0.841406	2.07492	-0.779454	0.00240697	0.0058727	0.234034	0.476886	0.856661	0.905186	0.209485	0.340139	2.3291	0.00150253	0.00477275	18.0266
WBGene00000016	abf-5	3.75996	3.22755	2.96144	5.97832	5.69333	5.2211	3.21571	2.89216	3.13819	3.36469	3.71284	2.6574	4.93232	4.70101	5.15266	3.18438	3.27637	2.39718	2.69481	3.0546	3.33729	4.8151	4.18098	4.17009	3.22382	2.99919	3.4384	abf-5	0.771522	-0.106343	-0.0545738	0.573706	-0.194521	-0.142009	0.407244	-0.0436969	2.2993e-07	1.28937e-06	0.406039	0.647597	0.673533	0.765827	0.278704	0.419469	0.62828	1.98165e-05	9.79654e-05	-11.5125
WBGene00000017	abf-6	3.79048	5.1219	5.15394	6.00548	6.2295	6.28435	4.89218	4.81452	5.38544	4.53207	4.97267	4.57668	5.77598	6.03429	6.46006	5.45499	5.48622	4.74808	4.63992	4.44787	5.33444	5.15904	5.55334	4.80505	5.19364	5.34595	5.11435	abf-6	0.418584	0.119517	0.0207601	0.397643	0.170774	0.0540106	0.166615	0.177859	0.000160598	0.000509053	0.23804	0.481304	0.841971	0.894726	0.598224	0.72015	0.376883	0.000768677	0.00262891	18.1542
WBGene00000018	abl-1	27.6041	24.2118	25.912	26.7923	24.1507	26.2932	26.6801	29.6927	30.5239	26.8334	24.6676	27.5818	33.5774	33.2111	32.9203	29.1578	27.3553	27.7759	25.7181	25.7078	26.284	29.5909	32.1195	32.4048	28.2612	28.1762	29.9759	abl-1	-0.00928447	0.155794	0.0243972	0.358719	0.113327	-0.00128114	0.272282	0.151011	0.870444	0.9024	0.0083492	0.0616273	0.670824	0.763447	0.982047	0.990601	0.334322	1.63725e-06	1.00958e-05	13.7033
WBGene00000019	abt-1	6.09221	6.60359	5.53385	8.11376	8.12729	7.44254	5.95198	7.8914	6.2276	8.65092	8.23427	9.15837	8.17317	7.98466	7.26291	6.107	6.36026	6.91256	6.96136	7.90977	8.11376	8.03086	8.69033	8.95825	5.53559	5.66806	6.68538	abt-1	0.384152	0.136046	0.521703	0.368011	0.0984315	0.33162	0.495577	-0.0280014	0.000388179	0.00113877	0.174634	0.402758	6.96247e-06	4.7907e-05	0.00177685	0.00726426	-0.153692	0.101734	0.177533	-0.294597
WBGene00000020	abt-2	18.9819	21.7421	18.4044	35.1703	34.5052	35.6926	19.0517	25.429	24.3574	30.6663	28.4467	31.5738	47.5388	49.0318	46.8382	35.1614	33.969	37.0857	27.1747	27.1103	27.3926	38.6176	39.9571	40.5681	29.6589	30.1787	30.4676	abt-2	0.840739	0.212405	0.624522	1.28609	0.852901	0.473219	1.01664	0.618072	1.04395e-12	1.38823e-11	0.00678083	0.0541936	1.37192e-09	2.62113e-08	3.29716e-07	5.78401e-06	0.661568	3.24925e-11	4.65591e-10	1.05932
WBGene00000021	abt-3	0.913106	0.884456	0.784105	0.97068	1.02177	1.04747	1.04747	1.01645	1.52738	1.35842	1.0391	1.72157	1.0212	1.01875	1.43741	0.893399	1.32981	0.909788	1.0047	0.867561	0.812844	0.707884	1.27358	0.829635	0.973362	1.01361	1.04526	abt-3	0.233433	0.437932	0.659017	0.400839	0.26194	0.0615138	0.0900101	0.232569	0.311083	0.397424	0.054405	0.197999	0.00513526	0.014746	0.794643	0.86982	-0.258179	0.212998	0.320521	-0.391763
WBGene00000022	abt-4	55.5871	62.8281	57.4691	37.4025	40.2187	38.6959	62.0226	67.2328	67.1923	71.044	67.4307	71.053	29.5808	31.7312	30.3875	59.0761	61.7389	59.4083	66.3513	63.5967	64.3314	34.8299	33.928	33.9633	60.5077	53.2726	54.7329	abt-4	-0.595105	0.161682	0.256457	-0.936212	0.0392264	0.148141	-0.772055	-0.0602194	1.38078e-12	1.79626e-11	0.0013838	0.0211422	5.23202e-06	3.76718e-05	0.00317141	0.0117713	-1.19267	7.44944e-20	5.39977e-18	-4.65056
WBGene00000023	abt-5	5.28979	4.84695	5.68866	7.7751	7.7178	6.81614	5.97832	6.65459	6.63491	6.85369	6.5222	6.59015	6.41146	6.87337	7.01718	5.20612	5.45499	5.35101	6.15075	5.86416	6.41938	6.42435	6.99299	7.00368	5.96287	5.86291	5.54717	abt-5	0.496158	0.280979	0.334945	0.357578	0.0192162	0.220912	0.365304	0.134961	3.25646e-07	1.77567e-06	0.000937665	0.0172953	0.000160416	0.000727969	0.0079965	0.0253099	0.0226329	0.762098	0.835513	0.067572
WBGene00000024	abu-1	2.42996	1.67496	1.95317	3.5207	4.59165	4.03965	1.4621	1.12004	1.63609	2.99485	2.50266	3.06677	2.87052	3.71284	4.4201	2.23266	2.15842	2.06303	2.15096	2.21743	2.57357	2.45579	2.33053	2.09289	2.09289	1.4621	1.38307	abu-1	0.994322	-0.545255	0.503921	0.839276	0.0911721	0.194421	0.192263	-0.315346	1.31181e-06	6.3905e-06	0.0115116	0.074989	0.00626027	0.0174514	0.278563	0.419402	0.335356	0.0362781	0.0751123	0.665493
WBGene00000027	abu-4	0.049777	0.0933673	0.0899412	0.567005	0.481012	0.567005	0.178866	0.146522	0.129589	0.240311	0.174276	0.258512	0.436003	0.548838	0.59979	0.312325	0.253557	0.270359	0.100926	0.133009	0.26335	0.167091	0.234285	0.140385	0.154068	0.049777	0.142487	abu-4	2.87246	1.03195	1.59224	2.82789	1.90552	1.02848	1.27321	0.46929	3.48628e-06	1.55766e-05	0.0466571	0.179308	0.00291913	0.00906103	0.0479583	0.109577	1.23565	0.00130553	0.00420652	0.776043
WBGene00000029	abu-6	1.38094	0.819985	1.37149	2.14971	3.29693	3.24881	1.11448	1.01645	0.869947	1.92682	1.69779	1.74784	1.71553	2.06656	2.08912	0.973983	1.00566	1.35728	1.13218	0.98921	1.28112	1.33564	1.37149	1.15016	1.35842	1.24103	1.18521	abu-6	1.25409	-0.226754	0.606409	0.729066	-0.0723595	-0.0498844	0.140524	0.104275	3.79488e-07	2.05186e-06	0.317069	0.564309	0.00497306	0.0143372	0.82044	0.887265	0.122656	0.493559	0.609344	0.202266
WBGene00000030	abu-7	1.47233	0.924219	1.25903	2.99187	3.45335	3.30454	1.15263	1.15263	1.30454	1.95912	1.92449	2.15594	1.93783	2.02485	1.73917	1.04526	1.22091	1.63369	1.36123	1.60137	1.70904	2.02119	1.76428	1.45425	0.973362	0.778434	1.15016	abu-7	1.4064	-0.012905	0.732415	0.647841	0.105623	0.347359	0.530259	-0.3405	3.62676e-09	2.75891e-08	0.94549	0.977459	0.00021848	0.000954311	0.0618719	0.133631	-0.0845745	0.586304	0.693478	-0.115473
WBGene00000031	abu-8	4.07023	3.31485	4.05947	8.03158	11.8538	9.9566	4.24684	3.54146	3.6722	6.58415	6.3273	6.69429	7.43755	8.26797	7.59652	4.75435	5.15805	3.94278	4.18243	4.58318	4.34588	5.6634	6.01469	4.21243	4.09664	3.33787	3.01688	abu-8	1.35285	-9.87688e-05	0.777944	1.02615	0.259509	0.19209	0.474185	-0.141232	1.37007e-10	1.29527e-09	0.999492	0.999895	7.71351e-06	5.24513e-05	0.213065	0.34415	0.248208	0.0532864	0.104121	0.319056
WBGene00000033	abu-10	3.02367	2.10641	3.24286	7.01127	8.9905	8.86419	2.35137	1.95476	2.10008	4.29126	3.25362	4.24262	5.04527	5.02644	5.42677	2.69708	2.54409	3.58123	2.85849	2.40449	3.11327	3.56913	3.07508	2.83693	2.16333	2.82008	1.81644	abu-10	1.55579	-0.372012	0.497895	0.893337	0.0865779	0.0127496	0.19581	-0.302769	8.17487e-11	8.05749e-10	0.0557359	0.20124	0.00527831	0.0150969	0.942468	0.965494	0.395443	0.0119824	0.0292519	0.79423
WBGene00000034	abu-11	5.81353	4.42891	6.13971	10.9552	14.6774	12.939	5.16976	4.04917	4.21179	7.93834	6.47271	9.29177	8.29188	10.1165	8.99935	4.54754	5.97832	5.92956	4.81049	4.793	6.07133	6.24223	6.50009	5.12498	4.51513	4.42891	3.62201	abu-11	1.21514	-0.282263	0.529817	0.740588	0.0184779	-0.066165	0.137536	-0.377127	1.37908e-09	1.11501e-08	0.0896234	0.269196	0.00107915	0.00379249	0.675306	0.782495	0.21077	0.123541	0.207478	0.397817
WBGene00000035	ace-1	7.76854	7.6233	7.05502	5.40613	5.83975	5.66467	7.99425	7.32338	8.1041	5.96762	7.81068	7.22173	5.62122	6.52541	5.96535	7.03028	7.51735	6.82331	6.40331	7.62266	6.61198	6.27343	6.21231	6.81301	7.41475	6.50173	6.77905	ace-1	-0.412925	0.0590355	-0.10331	-0.311445	-0.0725166	-0.131505	-0.224658	-0.119406	8.58413e-05	0.000288301	0.478555	0.705464	0.242084	0.358132	0.135681	0.245685	-0.208135	0.0295894	0.0632078	2.01466
WBGene00000036	ace-2	16.5944	16.8798	15.2471	13.0328	14.1011	14.0026	16.1883	19.5043	19.6159	16.9053	19.4294	18.9259	16.4501	16.612	16.5345	20.8392	19.2243	20.2151	18.6782	18.0706	17.6262	14.205	15.6694	15.7968	19.2202	19.4657	18.9678	ace-2	-0.246731	0.176707	0.18219	0.0274822	0.306426	0.161206	-0.096121	0.245163	0.00119463	0.00312503	0.0101134	0.0690135	0.00928147	0.0243528	0.0190434	0.0518055	-0.154708	0.0256581	0.0559031	-0.849157
WBGene00000037	ace-3	2.23362	2.29061	2.04776	1.52494	1.74662	1.92682	1.96439	2.61438	1.83989	2.01707	2.30401	2.27536	2.08912	2.02485	2.08912	2.5543	1.97511	2.77091	2.17995	2.40449	1.91808	1.92001	2.09289	1.74723	2.12671	2.07901	1.74398	ace-3	-0.351065	-0.0418682	0.0078682	-0.081381	0.140487	-0.0210813	-0.182359	-0.144269	0.0254339	0.0470805	0.763774	0.886892	0.955747	0.97266	0.88065	0.926307	-0.0892492	0.539899	0.652546	-11.343
WBGene00000038	ace-4	0.735531	0.67057	1.02375	0.872637	0.623883	0.656635	0.976111	0.67057	0.75067	0.84371	0.470739	0.59979	1.0212	1.07359	0.841534	1.00788	0.851439	0.663592	0.669264	0.632269	0.513777	0.980287	0.685773	0.996025	1.00788	0.636929	0.842509	ace-4	-0.153385	-0.0133196	-0.368303	0.294339	0.0298727	-0.404566	0.119323	0.026688	0.533699	0.617711	0.954797	0.980872	0.169026	0.269681	0.129059	0.235984	0.662641	0.0156143	0.0365611	-1.79918
WBGene00000039	acn-1	15.1815	16.275	15.5178	12.5431	14.1782	13.7271	13.1198	17.9382	19.7643	15.9861	16.1794	17.2465	14.061	15.2053	14.9407	15.2171	15.0984	14.8583	16.3858	17.2168	16.8437	11.5989	10.9393	9.97756	14.7023	15.3942	16.4078	acn-1	-0.220352	0.0879386	0.0761383	-0.0866312	-0.0556866	0.103088	-0.52782	-0.0143502	0.0220737	0.0416327	0.316965	0.564309	0.3956	0.520799	0.24605	0.383724	-0.16277	0.0812957	0.147376	-2.13781
WBGene00000040	aco-1	245.959	255.976	249.769	112.637	116.361	114.71	262.064	247.38	256.128	307.538	315.799	319.598	135.528	133.514	125.707	311.451	298.985	297.714	329.569	325.848	330.181	127.127	127.127	124.789	330.676	343.088	340.731	aco-1	-1.12902	0.0265303	0.327744	-0.928714	0.272129	0.391567	-0.986887	0.432989	3.31637e-25	4.39659e-23	0.363648	0.607315	3.55434e-12	1.1389e-10	4.08945e-14	4.01252e-12	-1.25646	8.4798e-27	4.0908e-24	-3.83365
WBGene00000041	aco-2	775.575	788.077	746.16	1057.46	1051.92	1044.51	750.453	903.849	894.774	1322.7	1228.76	1228.76	1322.7	1322.7	1379.55	996.872	1015.8	978.379	1143.28	1143.28	1150.72	1275.47	1275.47	1409.29	903.849	907.777	967.183	aco-2	0.450128	0.136685	0.7101	0.801335	0.373119	0.57416	0.775162	0.266406	1.99797e-10	1.85455e-09	0.00732847	0.0570962	3.26371e-15	1.78241e-13	6.63029e-13	4.92087e-11	0.091235	0.0507904	0.100122	0.128482
WBGene00000042	acr-2	0.545169	0.707884	0.513777	0.669264	0.648205	0.513777	0.842509	0.814351	0.786693	0.67057	0.500479	0.567005	0.569914	0.548838	0.431352	0.427577	0.782896	0.628795	0.669264	0.826354	0.768794	0.631653	0.51895	0.669264	0.543824	0.706068	0.807674	acr-2	0.0733531	0.490624	-0.0112335	-0.167849	0.0657772	0.364631	0.0490872	0.22139	0.750258	0.805597	0.0285084	0.1327	0.962326	0.97661	0.104654	0.20112	-0.156616	0.528523	0.642079	13.9418
WBGene00000043	acr-3	0.170646	0.633246	0.12278	0.698364	0.341222	0.599235	0.248825	0.47777	0.231815	0.377175	0.534617	0.753274	0.405182	0.573975	0.571235	0.427577	0.476665	0.567005	0.539892	0.404605	0.224709	0.778434	0.447775	0.513777	0.513777	0.545169	0.594923	acr-3	1.18189	0.393911	1.21122	1.12216	1.07622	0.675167	1.27696	1.23021	0.0150876	0.0298504	0.421468	0.659248	0.0131685	0.0328777	0.164122	0.284011	-0.089062	0.811266	0.872028	-0.0735308
WBGene00000044	acr-5	0.513777	0.781823	0.722322	0.94401	0.754237	0.684565	0.610753	0.636929	0.59979	0.951955	0.735531	0.506477	0.896232	0.754237	0.898	0.893399	0.782896	0.772963	0.59979	0.746979	0.768794	0.94589	0.973362	0.996025	0.795519	0.706068	0.842509	acr-5	0.279524	-0.0923917	0.0878551	0.368773	0.305603	0.0837351	0.567772	0.24999	0.19443	0.269444	0.679933	0.839499	0.691834	0.780375	0.702249	0.802524	0.280918	0.195516	0.29964	3.19751
WBGene00000045	acr-6	0.140385	0.129589	0.151511	0.236835	0.26335	0.366258	0.212778	0.240311	0.129589	0.204483	0.084508	0.19592	0.204483	0.367495	0.222487	0.129589	0.224709	0.270359	0.292279	0.174276	0.34017	0.167091	0.447775	0.423735	0.324738	0.312325	0.084508	acr-6	0.987748	0.429371	0.110743	0.860301	0.533737	0.885547	1.14041	0.547327	0.0641466	0.104356	0.428372	0.665551	0.846315	0.897147	0.0978096	0.190796	0.749558	0.168118	0.265356	6.76848
WBGene00000046	acr-7	0.513777	0.707884	0.722322	1.0822	1.10134	1.62378	0.511421	0.636929	0.902609	0.918312	1.00081	0.907391	0.94589	0.826967	1.0994	0.698364	0.943338	0.507819	1.0047	0.439527	0.883744	1.46864	1.79983	1.6095	0.973362	0.814351	0.842509	acr-7	0.966006	0.0478643	0.566776	0.577441	0.113116	0.235948	1.35866	0.462545	0.000851444	0.00230148	0.867298	0.939519	0.0444849	0.0919725	0.407873	0.552839	0.0106651	0.965749	0.979568	0.0188171
WBGene00000047	acr-8	2.62147	2.36235	2.32726	1.67172	1.38094	1.15771	2.59059	2.2947	2.43144	2.40565	1.89124	2.37327	1.37628	1.75499	1.76998	1.8932	2.10569	1.88287	2.52667	2.05656	2.09175	1.50609	1.76428	1.78164	2.36419	2.2947	2.31936	acr-8	-0.791445	-0.00103666	-0.135591	-0.585219	-0.312475	-0.127095	-0.536225	-0.0679836	1.00414e-05	4.09558e-05	0.993148	0.997282	0.29346	0.415364	0.316233	0.45966	-0.449627	0.00344679	0.00989609	3.31605
WBGene00000048	acr-9	0.671813	0.781823	1.15628	0.892127	0.814351	0.539892	1.18634	0.907391	0.59979	1.01645	1.0391	0.93904	0.973362	1.41709	0.868797	0.814351	0.913106	1.04633	1.10134	0.826354	0.698364	0.980287	1.57111	0.996025	1.1191	1.13913	0.729335	acr-9	-0.17879	0.0552628	0.236951	0.336969	0.139982	0.0468519	0.462802	0.210198	0.537788	0.62145	0.838949	0.926578	0.381977	0.50766	0.865241	0.916371	0.100018	0.700197	0.787789	0.422102
WBGene00000049	acr-10	0.140385	0.34017	0.212778	0.347299	0.234285	0.567005	0.346131	0.341222	0.201717	0.342374	0.274186	0.163406	0.405182	0.204483	0.252514	0.204483	0.409693	0.356884	0.26335	0.211465	0.44667	0.236835	0.409693	0.382116	0.324738	0.241803	0.347299	acr-10	0.74905	0.450379	0.201107	0.37138	0.576883	0.457357	0.638281	0.49559	0.0825184	0.129833	0.299784	0.548037	0.655781	0.751498	0.295314	0.436784	0.170273	0.69636	0.784647	0.846675
WBGene00000050	acr-11	1.47233	1.56669	1.33114	1.77256	1.55243	1.50016	1.55997	1.40056	1.23253	1.35842	1.24967	1.37319	1.32684	1.10134	1.302	1.77937	1.32981	1.07104	1.07009	1.72157	1.20431	1.50609	1.46864	1.6095	1.5475	1.4949	1.53769	acr-11	0.152105	-0.0564358	-0.13306	-0.235503	-0.123897	-0.178081	0.0648151	0.0729661	0.34255	0.430729	0.729634	0.86649	0.438362	0.56303	0.296185	0.437663	-0.102442	0.56643	0.676747	0.769892
WBGene00000051	acr-12	1.53542	2.0193	2.01582	1.60137	1.07869	1.95476	2.10713	2.09413	1.87428	8.41311	8.46592	8.21758	2.92188	2.69708	3.27372	2.83414	3.06777	3.13703	6.96136	6.86793	6.77545	1.85114	2.30624	1.70285	2.85265	2.49546	2.98751	acr-12	-0.282109	0.147032	2.18761	0.684234	0.721996	1.9049	0.0938106	0.594303	0.100576	0.154153	0.338072	0.583918	1.62973e-15	9.46604e-14	4.71534e-14	4.54951e-12	-1.50338	1.27134e-13	2.82344e-12	-0.687224
WBGene00000053	acr-14	0.279805	0.371314	0.246492	0.269248	0.142487	0.210348	0.12126	0.404605	0.167091	0.140385	0.374786	0.227103	0.14382	0.287354	0.458477	0.27634	0.439527	0.334011	0.513777	0.67057	0.549909	0.273059	0.374786	0.306282	0.253557	0.44407	0.454863	acr-14	-0.529228	-0.532943	-0.358372	-0.154495	0.24354	0.959631	0.108319	0.341278	0.250764	0.333105	0.240912	0.483858	0.42435	0.549891	0.0137831	0.0394938	0.203877	0.654933	0.752313	-0.568898
WBGene00000054	acr-15	3.49831	2.87382	2.53023	3.12477	3.14175	2.37327	3.0259	3.16385	2.97331	4.59927	4.51513	4.06666	3.2457	3.2549	4.05378	3.5207	3.00031	2.39718	3.96059	3.33144	3.07979	3.30454	3.4888	3.27637	3.83687	3.10835	2.89427	acr-15	-0.0413823	0.0494718	0.567685	0.238737	-0.0293478	0.228271	0.186178	0.141966	0.780324	0.830466	0.731997	0.867626	0.000261471	0.0011149	0.11638	0.217987	-0.328947	0.018689	0.0427462	-0.579454
WBGene00000055	acr-16	4.57036	4.26394	4.50254	4.04217	4.27087	3.79744	4.28108	5.21746	5.01033	3.61753	3.41875	3.88353	3.59914	3.93589	3.45145	5.00525	3.78681	4.03691	4.40671	3.97416	3.73262	5.08651	4.18098	4.84514	4.39285	4.36789	4.34588	acr-16	-0.142187	0.113096	-0.288872	-0.280741	-0.0815544	-0.138669	0.0717637	-0.0264759	0.171734	0.242697	0.24951	0.49443	0.0112208	0.0286661	0.183354	0.307762	0.0081317	0.941963	0.964568	-0.0281498
WBGene00000056	acr-17	1.57443	1.52793	1.67735	0.992178	0.917178	1.0047	1.29959	1.25609	1.67381	0.609498	0.801822	0.87529	1.04747	0.936158	0.948213	1.04526	1.29959	1.21588	0.84371	1.10134	0.768794	0.707884	0.786693	1.15016	1.35842	1.52847	1.00664	acr-17	-0.716218	-0.198621	-1.07575	-0.708855	-0.421651	-0.846587	-0.915801	-0.313468	0.000542617	0.0015373	0.219324	0.459323	2.32463e-05	0.000135658	0.000129769	0.000806044	0.366899	0.105325	0.182463	-0.341062
WBGene00000057	acr-18	2.62147	3.18438	3.36469	3.25426	3.84904	3.76454	3.75669	3.10907	2.43144	3.58011	3.18438	3.91312	3.53991	3.99645	3.56182	3.75996	3.8186	3.75432	3.42044	4.01807	3.84904	3.44091	3.77999	2.75568	3.52134	3.80135	3.79978	acr-18	0.247188	0.022554	0.233592	0.288427	0.318906	0.302856	0.138914	0.290545	0.0655351	0.106349	0.866224	0.938823	0.0858048	0.157807	0.0253313	0.0654082	0.054835	0.670706	0.764666	0.234747
WBGene00000058	acr-19	0.700701	0.819985	0.819985	0.698364	0.898	0.915166	0.682401	0.706068	1.12688	0.814351	0.534617	0.728255	0.865354	0.936158	0.628795	0.851439	1.29959	1.60137	0.902609	1.18846	0.626464	0.707884	0.753274	0.62757	0.866587	0.949999	1.21588	acr-19	0.0864705	0.0563011	-0.178729	0.0547158	0.678206	0.168853	-0.146642	0.362528	0.739673	0.796794	0.827582	0.920554	0.526775	0.643536	0.512978	0.647349	0.233444	0.411799	0.533856	-1.30614
WBGene00000059	acr-20	0.671813	1.00337	0.992178	1.0822	0.898	1.59382	1.18634	1.25609	0.934651	1.04991	1.0391	1.18395	1.09473	1.25161	1.06164	0.973983	1.18748	1.12962	1.07009	0.94589	1.12898	1.25903	1.40626	0.589117	0.833198	0.513777	1.43306	acr-20	0.407252	0.371255	0.333333	0.386516	0.343221	0.273463	0.277355	-0.0399185	0.14946	0.215749	0.186952	0.418942	0.246695	0.363172	0.338821	0.482478	0.0531824	0.844648	0.896255	0.159547
WBGene00000060	acr-21	0.170646	0.306282	0.545169	0.32204	0.513777	0.27634	0.284702	0.439527	0.374786	0.377175	0.374786	0.439527	0.482202	0.23574	0.312325	0.589691	0.377175	0.270359	0.355563	0.211465	0.298269	0.44916	0.409693	0.513777	0.651577	0.343787	0.314909	acr-21	0.238877	0.256659	0.399607	0.120971	0.336081	-0.0835513	0.587025	0.460136	0.546111	0.629476	0.512639	0.728182	0.311576	0.434664	0.841496	0.901453	-0.278636	0.476657	0.593583	-0.697275
WBGene00000061	lgc-11	0.513777	0.44667	0.413184	0.423735	0.481012	0.481012	0.284702	0.306282	0.34017	0.342374	0.439527	0.439527	0.513777	0.59979	0.689154	0.511421	0.507819	0.663592	0.513777	0.365129	0.479036	0.707884	0.721714	0.382116	0.289881	0.671813	0.347299	lgc-11	0.00756273	-0.555623	-0.165435	0.372371	0.294265	-0.0135026	0.378184	-0.156166	0.978659	0.985126	0.0854636	0.261569	0.580564	0.690261	0.962289	0.978401	0.537807	0.0725037	0.134197	-3.25086
WBGene00000062	acr-23	0.37194	1.0391	0.479036	0.567005	0.513777	0.567005	0.573975	0.404605	0.525336	0.609498	0.439527	0.59979	0.597377	0.676254	0.431352	0.664084	0.346131	0.689154	0.355563	0.557617	0.513777	0.596149	0.51895	0.513777	0.253557	0.706068	0.386511	acr-23	-0.0205672	-0.1721	-0.031815	0.0162545	-0.0494177	-0.278701	-0.0400241	-0.43774	0.950854	0.964414	0.613063	0.799774	0.925628	0.95168	0.430659	0.574061	0.0480695	0.889471	0.928946	-1.51091
WBGene00000063	act-1	273.248	253.474	272.54	246.776	247.715	243.683	281.106	134.951	134.405	135.422	138.765	144.551	127.947	117.224	108.219	124.214	135.326	141.367	135.688	136.164	145.86	122.977	126.857	107.974	145.746	140.19	118.707	act-1	-0.114257	-0.624709	-0.930739	-1.17776	-0.992925	-0.935698	-1.1572	-0.985497	0.411638	0.5008	0.000130123	0.00673113	6.39363e-07	6.03468e-06	5.30194e-07	8.57344e-06	-0.247019	0.121874	0.204995	0.265401
WBGene00000064	act-2	955.744	920.16	935.525	915.32	903.849	921.334	918.988	911.652	926.048	918.988	921.334	961.017	915.32	911.652	889.321	903.849	915.32	926.048	898.753	911.652	898.753	898.753	903.849	870.728	931.046	885.455	918.988	act-2	-0.0370277	-0.0286846	-0.00513675	-0.0497083	-0.0341739	-0.0538114	-0.0723532	-0.0401343	0.120436	0.179563	0.22331	0.464346	0.826311	0.884561	0.0275659	0.0701138	-0.0445715	0.066342	0.124787	8.67698
WBGene00000065	act-3	212.98	184.125	212.768	162.815	168.652	172.846	201.488	221.302	214.23	224.823	232.714	236.584	197.004	193.802	193.654	201.992	213.451	215.833	206.592	222.382	231.38	198.163	201.083	203.524	207.688	220.795	194.711	act-3	-0.273632	0.0633162	0.188561	-0.0596077	0.0523504	0.113608	-0.0155364	0.0315234	6.50291e-06	2.75051e-05	0.201381	0.43641	0.00055691	0.0021313	0.0263419	0.0675645	-0.248169	2.17228e-05	0.000106571	-1.31612
WBGene00000066	act-4	982.961	978.379	991.869	972.473	1044.51	1015.8	986.813	1322.7	1309.89	1336.62	1322.7	1379.55	1360.91	1360.91	1309.89	1134.84	1228.76	1253.38	1240.3	1275.47	1285.73	1322.7	1322.7	1275.47	1192.57	1228.76	1126.94	act-4	0.0368713	0.279087	0.451812	0.449162	0.293007	0.363655	0.409282	0.264162	0.561127	0.642689	0.000101403	0.00589493	5.35603e-08	7.02024e-07	2.37603e-06	2.92864e-05	-0.00264958	0.965435	0.979389	-0.00586435
WBGene00000067	act-5	433.768	438.401	453.846	418.403	431.201	437.731	471.616	425.917	424.745	553.046	571.81	597.72	402.158	389.435	365.76	798.325	819.234	845.773	481.17	501.973	494.341	355.033	353.009	307.365	559.499	600.922	559.499	act-5	-0.0431289	-0.00476905	0.377788	-0.196179	0.894201	0.155585	-0.384801	0.374892	0.350113	0.438575	0.916609	0.964762	3.02939e-09	5.36851e-08	0.00172273	0.00708105	-0.573967	3.56375e-13	7.2219e-12	-1.51928
WBGene00000068	acy-1	15.9267	14.7644	14.9117	13.0613	12.6484	12.8118	14.0372	18.1718	17.5317	16.8051	17.4468	18.5811	17.8083	16.8051	17.6235	17.514	18.0076	16.7466	18.484	16.8367	18.0408	17.8903	17.9047	20.136	15.8778	17.4488	17.641	acy-1	-0.243705	0.112648	0.212468	0.193913	0.193783	0.227462	0.286228	0.157858	0.00338747	0.00798455	0.127636	0.334236	0.00646858	0.0179228	0.0035381	0.0129252	-0.0185548	0.796573	0.861736	-0.08733
WBGene00000069	acy-2	1.18846	1.64162	1.1191	1.1086	1.27491	1.07869	1.04747	1.78164	1.27082	1.59382	1.00081	1.92449	1.68664	1.78631	1.86386	1.77937	1.32981	1.53769	1.54886	1.25552	1.67381	1.33564	1.33165	1.3772	1.63246	1.37149	1.21588	acy-2	-0.165068	0.0521309	0.190564	0.463076	0.244749	0.209866	0.0637936	0.117977	0.451013	0.539855	0.800763	0.90758	0.36179	0.487335	0.307595	0.450042	0.272512	0.175317	0.274523	1.43003
WBGene00000070	acy-3	12.2361	13.082	10.6527	8.56504	7.24875	8.1053	12.0786	14.1543	13.4543	11.3544	10.8512	10.916	10.621	10.1763	10.2815	12.015	11.8118	12.0526	12.6484	12.9809	12.7641	9.22163	10.5934	10.4458	13.9117	14.2129	12.2959	acy-3	-0.580695	0.144757	-0.113036	-0.204214	0.00310621	0.1	-0.247564	0.173559	9.32884e-08	5.62744e-07	0.052847	0.19416	0.147831	0.242985	0.17997	0.303362	-0.0911774	0.254782	0.368795	0.806622
WBGene00000071	acy-4	9.57062	9.73278	9.25272	5.25823	4.55917	5.54316	10.1044	12.7612	10.2803	10.5502	8.8744	9.68046	5.59133	5.86536	5.48749	14.4579	13.9937	13.5996	8.8369	8.74049	8.93061	6.46646	5.94721	6.84852	11.7159	10.292	11.2596	acy-4	-0.897791	0.210096	0.0243878	-0.752154	0.556173	-0.106602	-0.575735	0.218328	3.85491e-10	3.43148e-09	0.0109481	0.0728768	0.764934	0.83791	0.20152	0.330451	-0.776541	3.65877e-09	3.67202e-08	-31.8414
WBGene00000072	add-1	11.1655	11.99	12.6559	14.0812	12.3415	13.387	11.1412	13.2601	12.5845	7.34873	7.06727	7.9694	12.6939	11.6659	11.9648	5.7023	5.83652	5.31176	9.98112	9.99339	9.64285	14.7554	13.6997	14.326	11.2723	10.333	10.8441	add-1	0.157681	0.0453113	-0.672667	0.0232324	-1.08793	-0.270255	0.258978	-0.139941	0.0231187	0.0433682	0.498171	0.718743	1.78523e-09	3.31949e-08	0.000615988	0.00301009	0.695899	9.30581e-10	1.03665e-08	-1.03454
WBGene00000073	add-2	15.3311	15.6479	14.0287	17.0811	17.0026	16.479	14.958	16.6145	17.0481	16.6145	16.2164	15.8637	19.8194	19.0913	20.3818	16.8781	15.024	16.4719	16.0256	14.256	17.2922	20.5331	19.8829	20.7361	18.5532	16.2491	16.8437	add-2	0.170676	0.109206	0.114335	0.39843	0.102207	0.0803525	0.443031	0.198242	0.0144697	0.0287984	0.106402	0.299617	0.0975178	0.174919	0.236165	0.372083	0.284095	0.000142696	0.000583106	2.48476
WBGene00000074	adm-2	28.4988	29.4213	27.6577	37.3077	34.5803	38.1603	27.3028	27.9935	29.4131	28.8922	28.7808	30.6711	38.1514	40.0878	36.6027	32.7336	31.3666	30.9771	29.9301	32.4472	28.4378	36.0855	35.1658	33.8667	30.9012	31.0224	33.2045	adm-2	0.363476	-0.0157372	0.0479923	0.425919	0.150323	0.082918	0.29922	0.152509	5.92895e-08	3.68929e-07	0.762424	0.886101	0.364965	0.490395	0.117921	0.220231	0.377927	3.79771e-08	3.15272e-07	7.87475
WBGene00000075	adm-4	20.5152	19.9972	20.6778	20.0711	21.3501	21.1163	20.9297	24.9443	26.9781	25.7078	24.6676	25.4108	26.1702	25.199	25.0699	23.9644	24.6628	22.8781	23.8459	26.3297	25.7459	24.5264	28.0627	28.1724	25.1946	26.0945	25.7519	adm-4	0.0281352	0.239559	0.308399	0.321241	0.222367	0.306686	0.394478	0.332604	0.677622	0.743885	0.000943713	0.0172953	6.00552e-05	0.000309505	5.80923e-05	0.000413819	0.0128412	0.841802	0.894273	0.0416382
WBGene00000079	adr-1	80.8329	87.6844	84.8314	83.7241	79.2665	80.9843	83.4988	95.9328	95.2826	86.6006	84.3055	87.4033	83.7099	85.3887	88.1549	92.4756	85.7292	85.3344	89.8903	87.7771	87.9728	91.1645	91.1181	92.1688	91.7572	91.7246	95.116	adr-1	-0.0519993	0.114841	0.0299706	0.0231011	0.0554243	0.0705895	0.116863	0.13861	0.234126	0.314711	0.0107375	0.0718608	0.489332	0.610505	0.107035	0.204473	-0.00686955	0.874053	0.918311	-0.229209
WBGene00000080	adr-2	85.3485	85.3887	85.0996	89.141	88.8845	90.4084	86.8359	85.1815	87.5202	92.3261	88.8606	87.3343	86.6945	90.6421	91.8045	89.3448	89.1012	85.6104	85.5588	85.8843	86.6177	94.4843	94.3386	93.5147	85.1815	86.3404	91.468	adr-2	0.0691608	0.0203699	0.0687595	0.07237	0.0443371	0.0123187	0.142367	0.0388241	0.0355214	0.0628973	0.520258	0.732607	0.0376588	0.0798852	0.698554	0.800007	0.00361055	0.909681	0.942852	0.0525099
WBGene00000081	ads-1	152.778	156.759	154.415	117.224	129.51	120.561	158.493	139.975	145.383	167.084	167.892	157.354	97.2443	98.7663	100.709	159.241	156.234	156.234	160.389	162.521	158.493	95.6156	101.496	97.1661	143.141	141.48	147.039	ads-1	-0.339226	-0.0652026	0.0845277	-0.645153	0.0237508	0.0533938	-0.656761	-0.104096	1.31935e-09	1.07071e-08	0.0940993	0.277128	0.0326996	0.0711201	0.165886	0.286291	-0.72968	2.47055e-17	1.08899e-15	-8.63244
WBGene00000082	adt-1	3.96985	4.04827	3.49582	2.73622	3.0546	2.8657	4.24684	5.47748	5.2138	6.10952	6.63969	6.82962	3.53991	3.90602	4.1931	5.00525	4.84812	5.2259	5.41918	5.68929	5.63114	2.82636	3.8066	2.83693	4.81756	5.20433	4.83062	adt-1	-0.412892	0.368043	0.770244	0.013029	0.393717	0.541119	-0.283614	0.370717	0.00145225	0.00373315	0.00110897	0.0189749	1.66175e-08	2.49004e-07	9.1954e-06	8.93157e-05	-0.757215	3.07528e-08	2.60402e-07	-0.983085
WBGene00000083	adt-2	61.5278	64.0392	63.2655	29.8535	30.9135	29.6626	61.3815	72.7593	72.1508	62.7227	66.0315	67.5477	40.058	38.9053	39.0505	62.501	61.9014	63.483	66.4159	65.0058	69.8827	41.6691	40.7423	38.2785	66.6036	67.7716	67.0012	adt-2	-1.06178	0.12269	0.0570864	-0.677183	-0.00614228	0.0925973	-0.642983	0.09361	2.97548e-18	1.02125e-16	0.0115977	0.0753354	0.227727	0.341443	0.0530071	0.118453	-0.73427	8.80937e-15	2.40933e-13	-12.8624
WBGene00000084	aex-1	9.78167	10.5029	8.82207	11.4816	9.22484	9.11154	9.24679	10.8576	10.4716	12.4926	13.4353	13.7129	12.6449	12.6716	13.0163	15.0561	13.9648	13.149	12.2925	12.8673	12.5216	11.1097	11.1304	14.086	12.8828	12.9757	14.3853	aex-1	0.0409847	0.07184	0.452421	0.402927	0.533116	0.376909	0.304939	0.471464	0.659318	0.728303	0.434735	0.671411	1.89471e-05	0.000114041	0.000197165	0.00114329	-0.0494938	0.562467	0.67306	-0.109398
WBGene00000085	aex-2	0.913106	0.884456	0.851439	0.917178	0.567005	0.62757	1.01645	0.67057	1.00566	0.814351	0.470739	0.663592	0.542482	0.676254	0.59979	0.511421	0.75067	0.793842	0.669264	0.557617	0.513777	0.742306	0.654265	0.306282	0.724271	0.671813	0.942246	aex-2	-0.324004	-0.00717282	-0.458421	-0.531065	-0.349839	-0.584911	-0.662394	-0.194769	0.204476	0.280811	0.975065	0.989721	0.0930732	0.168533	0.0376819	0.0903149	-0.0726439	0.798897	0.863536	0.158465
WBGene00000086	aex-3	11.8966	12.9827	13.4705	18.8494	18.3339	18.7474	13.5398	14.9347	14.1782	15.0713	15.2612	15.2231	21.9563	21.207	21.1606	19.339	20.5287	18.8742	13.0881	13.0735	15.2053	20.4836	21.2001	21.0329	15.5735	15.5465	15.3638	aex-3	0.549176	0.156329	0.252542	0.750605	0.618223	0.108429	0.713395	0.281765	1.65207e-10	1.54587e-09	0.0123534	0.0783853	0.000189461	0.000841741	0.0785067	0.160695	0.498063	8.18685e-10	9.20862e-09	1.9722
WBGene00000088	aex-5	14.9365	13.6182	14.0734	17.7395	16.9161	17.7899	12.5095	12.9783	14.3818	19.7144	19.854	18.4281	20.9843	21.0785	20.8993	29.5392	27.8922	28.05	15.9793	16.7004	16.5849	16.6789	17.3068	15.7445	18.5126	20.3276	19.4657	aex-5	0.298367	-0.103537	0.440335	0.561952	1.00027	0.205809	0.22342	0.450245	1.01745e-05	4.144e-05	0.0855194	0.261569	1.08398e-08	1.67635e-07	0.00104966	0.00470315	0.121617	0.0273947	0.0591672	0.276193
WBGene00000089	aex-6	4.17294	4.32071	5.19364	6.32596	6.83326	6.31621	4.21718	4.34588	3.59914	4.67463	3.74184	3.44091	6.34113	5.54316	6.34234	4.41827	4.76434	4.81452	3.31485	4.75876	3.84904	6.83326	5.71483	5.2138	4.90082	4.94388	5.17294	aex-6	0.514577	-0.162691	-0.219699	0.416093	0.0435771	-0.222444	0.38307	0.140826	7.78139e-05	0.000263532	0.191683	0.424719	0.0929667	0.168393	0.0842646	0.16981	0.635792	1.75294e-05	8.75816e-05	-2.89392
WBGene00000090	age-1	96.0069	98.4472	96.7166	103.591	104.351	101.54	98.1592	100.115	96.9982	99.7739	96.9464	102.271	109.936	109.533	109.588	105.157	103.859	103.08	96.0668	103.388	100.185	113.041	109.322	108.372	103.063	97.4791	101.202	age-1	0.0884192	0.0207352	0.038879	0.176876	0.0999766	0.0397852	0.184521	0.051303	0.00773017	0.0166048	0.506826	0.724091	0.221968	0.334715	0.209202	0.339826	0.137997	0.000119932	0.000499127	3.54939
WBGene00000092	ags-3	36.1066	36.6531	35.1821	29.9201	30.4382	32.3784	37.7737	36.0732	37.966	30.4927	28.826	31.2933	33.4338	35.4117	32.7336	30.6439	30.8258	32.2063	29.9301	32.2773	30.4755	34.2359	34.1227	31.3069	33.3871	33.2724	34.0216	ags-3	-0.220824	0.0504177	-0.251187	-0.0866841	-0.202398	-0.221981	-0.112144	-0.100119	3.11672e-05	0.000114995	0.249942	0.494846	6.2422e-06	4.36602e-05	2.97763e-05	0.0002357	0.164503	0.00127602	0.0041306	-0.654902
WBGene00000093	agt-1	15.5465	15.3286	15.7199	17.3375	16.8211	17.6262	15.5465	15.3286	15.1542	18.9868	18.6389	17.5882	20.2612	19.7696	18.8952	21.1186	17.7863	18.3479	17.3191	18.3768	17.2554	19.3426	19.3498	16.9979	17.7229	17.682	17.6197	agt-1	0.152046	-0.0175419	0.241916	0.339189	0.285924	0.181994	0.25983	0.186365	0.0133249	0.0267406	0.765987	0.88817	0.000239116	0.0010343	0.00366709	0.0132989	0.0972725	0.0928746	0.164654	0.402092
WBGene00000094	agt-2	25.6072	25.8119	24.8729	21.9937	22.2843	21.4647	27.4432	22.5208	22.8289	21.2566	19.712	19.3352	21.8636	20.166	21.0033	20.5838	20.9723	19.1107	19.7036	21.0513	21.2326	22.953	19.8829	20.8442	21.036	19.3214	20.0049	agt-2	-0.214562	-0.0712875	-0.342255	-0.27649	-0.334432	-0.302743	-0.26277	-0.338968	0.00169079	0.00427546	0.245883	0.490045	1.02333e-05	6.66875e-05	4.38734e-05	0.000326037	0.0657649	0.326848	0.446256	-0.192152
WBGene00000095	aha-1	13.4967	12.8346	13.3988	17.0551	17.8624	18.6436	13.5134	14.9835	14.4522	15.1379	16.7718	16.1056	20.7775	21.4155	19.6159	16.1977	16.5178	14.9175	14.5251	13.1294	14.5239	19.2287	20.0595	18.9477	15.799	13.3614	15.4482	aha-1	0.426536	0.109723	0.271483	0.637405	0.256461	0.086794	0.552	0.16106	3.014e-07	1.65437e-06	0.106854	0.300183	0.000294925	0.00123629	0.203988	0.333584	0.365922	2.39035e-06	1.42549e-05	1.34787
WBGene00000096	ahr-1	0.877423	1.07489	1.1191	1.22091	0.754237	0.915166	0.714778	0.636929	1.15931	0.951955	0.698364	0.973362	1.0212	1.04579	1.03084	0.893399	0.913106	1.01361	1.13218	1.33165	1.0519	1.05608	1.2149	1.25903	1.00788	1.27082	1.11114	ahr-1	-0.081733	-0.345923	-0.222012	0.0269957	-0.103925	0.196735	0.205458	0.151886	0.684092	0.748858	0.104582	0.296197	0.296926	0.419279	0.304819	0.447338	0.249007	0.246062	0.35913	-1.1216
WBGene00000097	aip-1	29.1243	29.0288	31.8973	30.6877	27.9886	28.794	29.1349	28.0926	27.5024	28.952	32.2343	30.5718	27.2218	27.4879	26.9196	39.4122	39.3924	39.7787	27.6358	28.3251	27.9238	27.7143	25.5578	25.5413	35.9055	37.3921	36.7891	aip-1	-0.0389554	-0.0859049	0.0272644	-0.139841	0.398419	-0.101588	-0.190005	0.290762	0.404647	0.494095	0.0719125	0.235963	0.559396	0.672553	0.0372421	0.0893965	-0.167106	0.00141123	0.0045211	-6.12908
WBGene00000098	air-1	164.872	163.807	169.152	178.372	173.554	172.127	169.746	178.131	174.871	184.668	187.676	185.288	189.606	188.181	187.595	186.689	183.935	188.313	175.108	181.023	181.576	178.372	180.753	190.119	178.911	183.162	179.823	air-1	0.0744906	0.0701556	0.163623	0.183686	0.167106	0.110474	0.140145	0.122432	0.0119173	0.0242862	0.0168531	0.0961525	2.27739e-06	1.83108e-05	0.000423706	0.00218548	0.0200629	0.472578	0.589687	0.122616
WBGene00000099	air-2	67.2226	67.7716	67.3646	65.1108	67.2117	68.7924	68.0087	67.3392	65.8169	66.3023	67.2008	69.2979	68.094	68.9014	66.3288	70.7397	68.5285	67.619	68.2586	66.4488	63.3772	68.5285	71.9573	68.3311	64.9829	68.6194	68.2015	air-2	-0.0101929	-0.00805563	0.00378219	0.00733396	0.0304489	-0.0304469	0.0459851	-0.00422368	0.770204	0.821786	0.816382	0.91448	0.914195	0.943645	0.387203	0.531922	0.00355177	0.919835	0.949975	0.939078
WBGene00000100	ajm-1	104.909	103.638	99.4214	88.5262	92.2562	89.7093	98.4173	108.703	107.271	108.979	106.863	111.098	99.9493	98.6305	95.4732	103.33	101.614	105.901	108.419	111.656	109.418	88.7948	87.6683	86.4733	107.779	111.683	106.122	ajm-1	-0.187691	0.028123	0.0867651	-0.0662693	0.0138769	0.0971401	-0.227319	0.0803854	1.04421e-05	4.23413e-05	0.42053	0.658374	0.0182229	0.0434303	0.00864283	0.0269431	-0.153034	0.000148071	0.000602236	-1.76378
WBGene00000101	aka-1	278.153	285.433	272.156	296.612	292.876	286.574	278.779	289.094	299.818	290.225	288.526	293.037	315.324	324.359	328.807	295.382	307.365	292.366	290.88	283.91	282.943	306.04	305.575	337.628	287.544	279.673	291.251	aka-1	0.0687579	0.0534033	0.0615586	0.212819	0.0992198	0.0382801	0.180757	0.0388987	0.047051	0.0799076	0.11695	0.317256	0.0749025	0.141241	0.25846	0.397786	0.15126	8.71122e-05	0.00037466	2.45718
WBGene00000102	akt-1	161.913	162.475	158.607	194.108	185.452	186.581	159.873	157.524	161.265	169.152	166.112	159.933	181.726	189.606	189.445	171.441	167.588	165.368	160.095	163.29	160.445	184.994	186.763	198.993	157.524	158.729	161.913	akt-1	0.229725	-0.0131578	0.0350465	0.215175	0.0617336	0.00224397	0.238819	-0.0145599	2.09139e-08	1.40344e-07	0.666085	0.831745	0.257969	0.376009	0.941452	0.964898	0.180129	1.88623e-06	1.1482e-05	5.13972
WBGene00000103	akt-2	10.5941	11.3916	10.1351	14.5846	16.126	15.7591	11.0387	12.5647	10.2803	9.39737	7.99066	9.74957	12.5709	12.934	13.5025	12.3806	11.9672	10.9264	10.1763	9.62182	9.84265	12.7041	12.7828	12.7828	10.7627	10.7676	10.305	akt-2	0.531915	0.0792073	-0.241674	0.282095	0.131171	-0.110948	0.256021	-0.00925482	1.9177e-08	1.2954e-07	0.280124	0.528737	0.0041659	0.0123336	0.148913	0.263788	0.523769	1.78971e-07	1.3187e-06	-2.16725
WBGene00000105	alg-1	73.6315	71.5146	68.4759	77.0253	74.683	76.8862	70.5806	71.9931	73.838	76.1979	69.3541	74.6967	79.8042	80.8693	78.875	80.7513	83.826	82.9517	68.0504	71.529	71.1604	74.8197	77.783	74.0044	77.0385	75.7233	74.7791	alg-1	0.0981938	0.0181452	0.043649	0.165684	0.213463	-0.0208163	0.0860599	0.0912489	0.0101863	0.0211762	0.615247	0.801095	0.236421	0.352088	0.568205	0.695176	0.122035	0.00201911	0.00619866	2.79583
WBGene00000106	alg-2	99.9493	98.2543	100.498	106.735	109.996	116.485	99.2394	86.4369	86.5626	86.2607	89.9098	92.5402	107.21	102.813	102.431	101.049	100.164	106.389	83.9421	88.5619	85.0329	103.995	103.047	86.8951	94.4843	97.968	89.4372	alg-2	0.155489	-0.135861	-0.152278	0.0646894	0.0428097	-0.215149	-0.0233476	-0.084244	0.00610953	0.013477	0.016498	0.0948819	0.00868021	0.0229766	0.000427499	0.0021987	0.216967	0.000398722	0.00146397	-1.42481
WBGene00000107	alh-1	260.755	264.21	265.947	274.474	285.886	280.144	274.474	286.574	287.544	289.856	289.094	280.342	305.575	303.186	305.575	269.226	269.226	269.952	315.324	308.124	316.381	284.862	283.91	284.236	304.391	302.795	302.279	alh-1	0.087219	0.101119	0.119234	0.209338	0.0317726	0.249254	0.109201	0.201702	0.00108346	0.00286443	0.000218245	0.00866245	3.01924e-05	0.000170299	2.9987e-11	1.54536e-09	0.0901033	0.000761394	0.00260606	0.755683
WBGene00000108	alh-2	2.75897	2.73998	3.8261	3.14418	2.809	2.89216	3.38731	4.65396	4.12571	3.65626	3.55644	5.52212	4.70327	5.02644	4.37227	5.40962	4.82049	4.86741	5.75493	4.91113	5.48622	4.92477	4.75059	4.5523	5.12694	5.91981	5.17294	alh-2	-0.0536135	0.385685	0.450694	0.611744	0.700948	0.80861	0.627773	0.809307	0.733712	0.792092	0.0125489	0.0790774	0.00459775	0.0134343	3.34391e-06	3.87157e-05	0.16105	0.244937	0.357845	0.357337
WBGene00000109	alh-3	98.3477	95.6979	93.1302	83.9312	81.0384	78.1711	93.3838	117.078	115.88	111.885	110.284	114.198	94.1366	95.3511	99.2877	119.247	114.594	109.028	118.356	116.293	115.977	94.2835	92.3875	97.1661	113.91	111.531	117.957	alh-3	-0.23966	0.175426	0.228396	0.00710342	0.252822	0.288344	-0.0183914	0.257433	0.000154032	0.000491018	0.00256185	0.0297205	0.000193801	0.000858827	7.87412e-06	7.90005e-05	-0.221292	0.000293858	0.00111648	-0.968899
WBGene00000110	alh-4	124.503	130.932	126.857	133.14	138.984	135.045	135.231	140.31	141.021	141.76	144.973	148.475	127.831	124.596	120.53	143.533	144.928	141.869	143.141	149.109	145.087	127.831	128.983	126.464	147.039	149.227	140.596	alh-4	0.091102	0.124187	0.188134	-0.03475	0.171432	0.194141	0.004878	0.19317	0.00654905	0.0143517	0.000388236	0.0113129	1.47583e-06	1.24967e-05	8.09277e-07	1.21371e-05	-0.222884	8.66471e-08	6.79982e-07	-1.18471
WBGene00000111	alh-5	6.52334	6.03071	5.65359	3.48944	4.35251	4.52499	4.89218	5.51522	5.18167	7.27792	7.19391	8.0366	4.62846	5.3218	5.03678	6.45228	5.38678	5.75237	6.90887	7.86915	8.11376	4.13193	5.04057	4.05264	7.03397	6.38756	6.32225	alh-5	-0.58027	-0.226245	0.308156	-0.283467	-0.0611782	0.322057	-0.463765	0.115925	8.34157e-06	3.45665e-05	0.0288259	0.133534	0.00242345	0.00771266	0.00146832	0.00622112	-0.591623	1.7569e-06	1.07513e-05	-1.91988
WBGene00000112	alh-6	115.562	118.356	118.641	136.197	142.821	136.84	115.389	94.4503	92.1688	75.4652	80.7598	81.8297	95.422	95.0764	89.4969	68.6575	71.3001	73.7085	96.5201	101.614	99.7501	108.072	111.255	103.305	89.6779	89.6779	84.3628	alh-6	0.237772	-0.228407	-0.565713	-0.331692	-0.720104	-0.243762	-0.126461	-0.418526	6.83592e-05	0.000234022	0.000154607	0.00729637	3.8738e-11	1.0132e-09	7.54924e-05	0.000515766	0.234021	0.00024009	0.00093093	-0.413675
WBGene00000113	alh-7	29.8494	27.2373	29.7522	31.3868	31.8901	34.4819	27.7339	32.2201	33.6653	37.9061	39.6981	40.201	49.8754	48.1805	49.8044	38.6504	38.524	42.1497	37.7131	41.1552	41.9883	46.2915	45.31	38.8753	40.2686	41.2435	39.9571	alh-7	0.167146	0.100138	0.439613	0.76617	0.459032	0.471827	0.588172	0.483304	0.0163947	0.0320674	0.137449	0.349346	1.90689e-07	2.10668e-06	4.34588e-08	1.03906e-06	0.326557	8.82999e-06	4.72138e-05	0.742828
WBGene00000114	alh-8	746.16	761.271	771.061	563.616	568.989	573.828	719.748	620.792	611.626	547.912	557.752	575.714	456.834	445.412	452.44	496.05	488.311	505.822	586.954	599.948	581.049	471.616	473.204	452.44	606.737	570.408	570.408	alh-8	-0.416945	-0.225589	-0.437811	-0.749819	-0.612041	-0.365962	-0.704463	-0.382971	1.00335e-11	1.13815e-10	1.58372e-06	0.000429757	3.76453e-12	1.19522e-10	1.79757e-10	7.84383e-09	-0.312008	1.38311e-08	1.24976e-07	0.712655
WBGene00000115	alh-9	243.279	231.38	236.584	301.743	303.186	309.812	227.606	206.201	210.342	184.125	184.125	182.361	301.423	287.215	296.612	162.289	160.543	157.757	219.803	223.058	221.061	347.734	356.581	365.76	181.327	181.327	182.361	alh-9	0.362467	-0.144141	-0.369736	0.315086	-0.566507	-0.0998099	0.588108	-0.384338	8.65126e-13	1.16742e-11	5.55466e-05	0.00465709	1.68264e-12	5.71866e-11	0.00279534	0.0105842	0.684822	1.95436e-19	1.31214e-17	-1.85219
WBGene00000116	alh-10	36.3046	37.4394	34.9997	50.4701	52.7326	52.2742	36.1308	37.2006	36.5876	24.837	26.3432	24.837	32.3623	31.5453	31.7968	28.6452	27.3218	27.3979	30.1787	29.2827	29.7762	40.0023	37.1815	39.0967	35.3962	31.9678	34.6537	alh-10	0.515884	0.0165407	-0.517415	-0.183426	-0.385121	-0.283686	0.0962739	-0.0929991	1.32805e-13	2.01434e-12	0.687024	0.842966	2.87891e-12	9.37377e-11	2.94566e-07	5.27394e-06	0.333989	4.8221e-08	3.94839e-07	-0.645496
WBGene00000117	alh-11	49.2789	53.4288	52.5113	42.2314	42.2587	43.7763	52.2431	47.6694	46.6847	52.0897	49.7665	52.5291	39.9303	38.6893	37.8971	49.4354	50.6888	46.7532	45.2082	48.4125	50.8325	40.1924	40.8747	39.0967	44.7757	46.2313	46.2847	alh-11	-0.273849	-0.0807063	-0.00539303	-0.411502	-0.0797973	-0.105364	-0.366214	-0.175094	2.00357e-06	9.39165e-06	0.0820557	0.256008	0.905661	0.938294	0.0271294	0.0692368	-0.406109	2.23109e-09	2.32577e-08	75.3025
WBGene00000118	alh-12	76.3621	74.3863	72.1508	57.4691	55.0681	54.4551	75.6411	84.3476	86.6631	47.5233	50.5424	47.6694	48.7878	49.5101	49.906	49.6469	50.4768	48.9684	61.1848	60.4974	59.2315	62.1049	56.6166	58.0503	70.4152	73.0707	76.3914	alh-12	-0.415684	0.142384	-0.614169	-0.589047	-0.580529	-0.300799	-0.335059	-0.0206925	3.22953e-10	2.90007e-09	0.00196838	0.0254542	8.25798e-14	3.46416e-12	1.64573e-07	3.2442e-06	0.0251218	0.601906	0.70702	-0.0409038
WBGene00000120	aly-1	14.6476	14.8509	14.8069	21.5834	19.6236	19.6175	15.9988	14.6513	15.067	12.0193	12.0312	10.5934	20.2108	20.3484	21.8537	16.0909	14.8759	14.0932	11.5793	12.0738	11.2496	19.395	21.6433	19.9643	13.3547	13.4255	13.7271	aly-1	0.459962	0.0450502	-0.361953	0.492778	0.0163263	-0.346268	0.46168	-0.129485	1.10865e-08	7.76681e-08	0.46027	0.691599	6.56513e-06	4.56797e-05	1.00283e-05	9.61682e-05	0.854731	1.02429e-13	2.30128e-12	-2.36144
WBGene00000121	aly-2	175.338	168.851	182.887	185.918	179.773	186.837	183.054	154.355	145.592	159.347	160.855	153.421	169.888	166.112	165.55	173.338	174.187	175.414	157.199	148.419	156.124	166.373	167.428	166.916	164.762	164.953	159.091	aly-2	0.0684233	-0.130713	-0.154663	-0.0712112	-0.0107478	-0.190135	-0.0735222	-0.108423	0.155367	0.222941	0.00988196	0.0682114	0.00307145	0.00946076	0.00042584	0.00219227	0.0834518	0.09389	0.165997	-0.539572
WBGene00000122	aly-3	179.403	181.023	186.837	203.756	204.769	216.035	188.181	163.807	171.291	167.892	164.638	157.354	179.773	181.785	180.644	162.289	158.493	167.277	160.26	166.006	162.011	181.192	189.331	182.776	168.614	171.441	165.55	aly-3	0.189845	-0.0664535	-0.16078	-0.0130937	-0.164825	-0.164914	0.0161606	-0.11394	1.68289e-05	6.55337e-05	0.084017	0.258948	0.00020051	0.000885314	0.000141023	0.000868182	0.147686	0.000538633	0.00191659	-0.918561
WBGene00000123	ama-1	191.148	190.022	178.131	190.926	185.77	183.305	179.943	285.093	281.526	279.387	304.391	308.708	331.857	314.865	319.598	320.707	301.423	307.712	272.54	307.365	298.985	323.845	322.66	317.37	293.198	298.218	281.854	ama-1	0.00281169	0.383581	0.674395	0.789466	0.732783	0.649218	0.786344	0.643519	0.976668	0.983363	0.000297141	0.00993558	5.69948e-08	7.40336e-07	1.1049e-07	2.30357e-06	0.115071	0.205632	0.311733	0.170628
WBGene00000133	amt-1	0.482202	0.781823	0.513777	0.721714	0.567005	0.684565	0.511421	0.404605	0.525336	0.777282	0.629408	0.629408	1.37628	1.35242	1.5475	0.129589	0.224709	0.151511	2.52667	2.56394	2.39888	2.06656	2.48962	2.33494	0.439527	1.01361	0.698364	amt-1	0.201078	-0.26798	0.234392	1.31403	-1.80038	2.13021	2.0047	0.249018	0.435026	0.524524	0.33662	0.582954	0.367254	0.492708	7.31584e-10	2.79027e-08	1.07964	7.14745e-05	0.000312827	4.60611
WBGene00000134	amt-2	0.735531	0.924219	0.819985	0.490807	0.567005	0.833198	0.682401	0.746402	0.709999	0.479036	0.771209	0.698364	0.973362	1.10134	0.841534	0.469577	0.66043	0.598681	0.819985	0.98921	0.768794	0.778434	0.87529	0.953094	0.513777	1.04526	0.559924	amt-2	-0.433494	-0.200897	-0.357929	0.24639	-0.505261	0.054477	0.0724692	-0.282354	0.0893287	0.138987	0.390894	0.633845	0.161313	0.260148	0.807779	0.879267	0.604319	0.0206148	0.0464905	-1.68838
WBGene00000135	amt-3	1.32637	1.56669	1.29722	1.62518	1.65219	1.59382	1.22204	1.56669	2.02585	1.82317	1.82806	1.43741	2.56212	2.13118	2.36027	1.86386	2.00722	2.45068	1.64279	1.60137	1.44902	1.70285	2.13118	2.26278	1.66905	1.80885	1.32506	amt-3	0.228162	0.167366	0.272736	0.75928	0.611043	0.174407	0.532804	0.199637	0.198199	0.273597	0.3409	0.586528	0.12832	0.217248	0.327574	0.471371	0.486543	0.00514484	0.0141154	1.78393
WBGene00000136	amt-4	34.9091	31.7538	34.8838	6.48395	6.53476	6.96237	29.2556	30.3027	32.2559	19.7879	21.7711	23.5488	5.53559	5.35478	5.0661	10.4186	11.7448	11.8265	35.5158	35.7814	34.8702	5.8672	5.90222	5.34911	25.9421	23.7761	24.4803	amt-4	-2.34135	-0.148427	-0.639993	-2.6613	-1.57108	0.0637339	-2.55632	-0.453425	3.97133e-22	2.63685e-20	0.00659648	0.0532594	3.90887e-12	1.23428e-10	0.211291	0.342207	-2.02131	1.33136e-19	9.24871e-18	3.15833
WBGene00000137	amx-1	16.0553	17.7899	16.9415	16.8504	15.8458	17.6262	16.2789	18.0331	18.5875	17.7628	17.4923	17.2168	20.9843	21.2326	21.6433	18.7822	18.5747	19.2523	14.4828	16.9391	17.5511	20.5331	21.5699	22.4827	17.1012	16.0539	19.4258	amx-1	-0.0112839	0.0579403	0.0493376	0.334263	0.160868	-0.0604357	0.346695	0.0476415	0.870919	0.90273	0.398841	0.640944	0.480883	0.602193	0.390901	0.535434	0.284925	0.000226477	0.000883473	5.77502
WBGene00000138	amx-2	20.0796	21.3316	19.2065	17.2251	20.0451	19.31	20.6575	20.3209	21.2001	21.4061	20.556	22.8947	19.4258	18.4207	17.6641	20.2108	22.5238	22.5208	21.1186	19.1691	21.8585	17.2274	16.8722	17.2017	22.9776	21.2035	20.7739	amx-2	-0.104351	0.0383968	0.101341	-0.123892	0.112327	0.0389817	-0.237979	0.101172	0.1057	0.160828	0.532839	0.741135	0.110501	0.193461	0.530668	0.662887	-0.225233	0.00128777	0.00415856	-2.22253
WBGene00000139	amx-3	6.321	6.64483	5.99745	4.60991	4.00705	3.89605	6.35816	5.68644	5.5691	4.47006	4.07501	4.2026	4.09664	3.43118	3.27372	3.93833	3.41441	3.54658	5.52212	5.08491	5.86783	3.90772	4.95286	5.41867	4.97142	4.64922	5.54717	amx-3	-0.594839	-0.10417	-0.573038	-0.81455	-0.807028	-0.20096	-0.43122	-0.325628	3.90204e-06	1.72522e-05	0.272593	0.520089	8.53533e-06	5.71006e-05	0.0453695	0.104862	-0.241513	0.0470161	0.0937131	0.42146
WBGene00000140	anc-1	69.1362	71.4825	69.9982	53.5821	50.0508	52.8628	64.8009	91.6252	107.922	100.033	101.523	99.079	89.0835	93.7624	92.3727	111.214	119.691	113.953	86.1811	86.0519	95.37	74.4525	76.873	82.74	100.81	95.396	99.7739	anc-1	-0.428076	0.292028	0.513942	0.38652	0.712698	0.344207	0.148734	0.491304	0.000171258	0.000540376	0.003712	0.0374586	5.37764e-06	3.85785e-05	0.000873501	0.00403997	-0.127422	0.167099	0.264131	-0.247931
WBGene00000142	aos-1	103.305	97.2443	101.111	99.5514	98.7412	95.5647	101.111	102.33	100.997	99.7263	98.0295	99.4696	100.164	95.2826	95.1675	101.918	101.664	97.9799	102.589	96.8453	93.7793	98.2388	103.445	100.521	98.4472	102.431	104.325	aos-1	-0.0377631	0.0130187	-0.0215469	-0.0542911	-0.00179671	-0.0409662	0.00222652	0.0160435	0.282976	0.367655	0.706523	0.854878	0.539409	0.654732	0.245548	0.383079	-0.0327442	0.356986	0.47764	1.51967
WBGene00000143	apc-2	77.2684	77.783	73.9894	85.8843	76.9477	78.9736	73.0347	82.4999	82.9814	85.4073	83.7383	85.3756	88.2719	91.3504	91.2999	85.1679	83.7383	80.037	80.7598	80.1422	83.2673	89.3251	90.0012	90.2459	82.1863	81.3576	82.6177	apc-2	0.0792706	0.0553954	0.15274	0.242446	0.11864	0.0925523	0.235346	0.104377	0.0666096	0.107818	0.191654	0.424719	0.000991475	0.00351982	0.0340081	0.0830547	0.0897059	0.0377074	0.077757	0.58731
WBGene00000144	apc-10	10.8016	11.2916	11.4646	10.804	12.6095	10.7448	11.2483	10.8897	10.3635	10.9899	11.2566	9.98828	11.843	12.0356	12.415	10.4186	11.7189	11.3451	10.5941	10.4079	10.8016	13.2232	11.3579	11.7631	10.7627	10.5063	12.2412	apc-10	0.020226	-0.0436348	-0.0618213	0.113501	0.00127447	-0.0757554	0.114938	-0.00518377	0.777167	0.827685	0.542853	0.748897	0.401944	0.527352	0.301502	0.443594	0.175323	0.0221494	0.0494116	-2.83596
WBGene00000145	apc-11	21.1186	18.1395	20.2151	21.3544	19.2032	20.3783	22.4312	20.3818	21.6026	22.4666	22.7494	22.3296	23.1048	23.4761	21.9733	23.6808	24.1507	23.4201	22.3718	20.8251	21.9244	24.0384	22.6804	19.3768	22.7463	22.9806	23.8152	apc-11	0.0362481	0.11322	0.182859	0.204793	0.259491	0.131898	0.154319	0.223875	0.564125	0.645272	0.074106	0.240336	0.00606227	0.0169593	0.0406322	0.0962176	0.0219347	0.72095	0.804106	0.119954
WBGene00000146	ape-1	158.101	152.611	150.346	161.913	160.715	153.421	151.897	169.623	174.187	178.849	178.655	173.468	182.361	176.162	182.678	181.447	183.108	179.229	170.315	169.086	174.343	180.315	177.406	193.802	169.215	175.108	176.368	ape-1	0.046223	0.100978	0.203087	0.230735	0.237818	0.155943	0.255676	0.175198	0.245782	0.327968	0.0144152	0.0870173	1.44284e-05	9.00387e-05	0.000391567	0.00204092	0.0276474	0.478848	0.595529	0.136135
WBGene00000147	aph-1	34.2584	32.5646	31.0635	31.1399	30.7009	29.0527	34.1227	35.0765	32.964	35.1762	36.186	32.4176	33.9811	33.0754	35.5158	33.3793	36.0613	33.6764	36.6096	36.9812	34.6662	35.734	32.8711	37.9294	37.2145	33.6363	36.7029	aph-1	-0.106125	0.0624126	0.080492	0.0658036	0.0753331	0.144952	0.115589	0.134087	0.063422	0.103326	0.252947	0.49794	0.148962	0.244382	0.0112364	0.0334435	-0.0146884	0.788834	0.855428	-0.182483
WBGene00000148	aph-2	59.2572	61.1979	58.8145	52.1752	52.1133	54.5499	58.6894	68.4071	66.2617	66.0834	62.9451	63.7742	57.8702	64.1285	62.8139	65.1297	64.187	64.9746	63.853	61.6556	63.3951	62.6448	62.7735	68.0504	65.2829	63.4723	66.1941	aph-2	-0.175014	0.105943	0.105091	0.0430741	0.116588	0.0767535	0.106913	0.121306	0.000807165	0.00219684	0.026373	0.126406	0.0294021	0.0651055	0.103508	0.199381	-0.0620173	0.187808	0.289977	-0.590127
WBGene00000149	apl-1	228.02	219.257	220.795	248.538	262.664	259.063	223.838	207.864	197.085	179.34	180.002	179.229	208.033	206.758	204.958	207.776	209.547	207.149	182.142	179.722	182.361	197.166	197.741	185.648	204.567	203.09	200.35	apl-1	0.203952	-0.0885052	-0.310983	-0.108398	-0.097536	-0.295758	-0.202011	-0.13608	8.2316e-07	4.17518e-06	0.0118173	0.0761244	4.87084e-10	1.01673e-08	1.24967e-09	4.48408e-08	0.202585	1.92958e-06	1.17335e-05	-0.651435
WBGene00000150	apm-1	31.0776	32.3724	31.006	48.4125	49.4895	48.4541	32.1814	33.5613	35.095	29.5143	31.2776	30.9375	47.7261	45.152	46.9569	31.0676	31.6643	30.2649	31.9209	31.6749	27.8752	42.1735	42.2976	44.9942	31.3716	31.9678	32.0453	apm-1	0.632883	0.0930894	-0.041349	0.56673	-0.0224864	-0.047062	0.453112	0.0151426	1.45433e-14	2.61734e-13	0.05101	0.19018	0.388722	0.514198	0.323364	0.46686	0.608079	1.05826e-13	2.37147e-12	-14.706
WBGene00000151	apn-1	58.3822	57.5702	57.0539	58.7509	57.7851	62.2355	57.7145	54.702	57.5598	60.5554	60.6914	60.5163	57.9481	56.723	58.7211	55.0888	58.4592	59.6166	59.3769	58.2583	58.9548	57.3788	62.7735	57.2428	58.7791	61.3314	59.285	apn-1	0.0458775	-0.0264293	0.0711325	0.00251636	0.00304415	0.0298664	0.0364993	0.0521001	0.235925	0.316737	0.491394	0.713747	0.0722834	0.137151	0.438257	0.581542	-0.0686161	0.0841748	0.151709	-0.964624
WBGene00000155	app-1	229.108	233.78	228.188	208.979	197.648	199.947	232.521	223.838	229.006	207.688	204.327	202.429	198.669	205.373	205.373	201.29	207.149	203.756	216.516	218.37	210.918	206.969	208.376	208.376	219.803	221.978	220.694	app-1	-0.18743	-0.0118773	-0.169555	-0.181388	-0.174291	-0.0976211	-0.147686	-0.0606704	6.78178e-08	4.17953e-07	0.645735	0.819232	4.44563e-07	4.40429e-06	0.000740009	0.00351621	-0.011833	0.657176	0.754291	0.0697884
WBGene00000156	apr-1	119.247	118.601	112.441	127.599	123.618	122.01	114.489	137.784	143.498	147.868	141.105	145.687	169.423	164.321	169.423	150.241	147.61	146.81	141.72	141.997	141.76	161.578	161.913	165.684	144.507	142.187	143.102	apr-1	0.0924149	0.168076	0.31166	0.522686	0.344089	0.281	0.481704	0.295581	0.062565	0.102092	0.00134832	0.0208515	3.61197e-07	3.68561e-06	1.97684e-06	2.51899e-05	0.211026	8.72342e-05	0.000375092	0.677105
WBGene00000157	aps-2	16.7122	16.9985	17.7586	16.6789	17.5882	17.0811	17.8476	12.2021	13.8725	10.1992	10.668	10.7979	14.7821	14.0128	14.3992	11.2235	11.2658	10.5719	10.9953	10.686	10.4546	14.2565	14.3903	14.9146	11.843	12.7435	13.082	aps-2	-0.00437362	-0.244448	-0.699786	-0.252796	-0.641194	-0.678128	-0.242182	-0.451252	0.953144	0.96588	0.00314887	0.033757	5.10766e-09	8.6121e-08	6.33798e-09	1.90766e-07	0.44699	1.68416e-05	8.43146e-05	-0.638752
WBGene00000158	apg-1	112.749	113.763	121.186	123.999	121.589	127.638	123.163	131.086	136.664	121.619	122.499	126.885	138.479	142.04	140.558	123.546	128.062	128.82	125.165	126.642	123.797	144.883	138.54	141.869	131.131	132.474	125.188	apg-1	0.102647	0.167597	0.0947323	0.277016	0.131361	0.112016	0.291122	0.161785	0.00757752	0.0163173	5.64352e-05	0.00468069	0.0133963	0.0333363	0.00395698	0.0141839	0.182284	1.88702e-05	9.3741e-05	1.9242
WBGene00000159	aps-1	36.5876	36.0106	36.6096	39.1166	36.805	34.9997	35.6926	34.8501	37.1103	34.4138	34.2855	34.4564	33.898	35.2963	34.0686	38.1404	36.2696	35.1821	32.0014	32.9807	33.582	32.964	35.8089	39.1556	32.781	35.6872	34.2176	aps-1	0.0232853	-0.022613	-0.0827831	-0.0809816	0.000766546	-0.14988	-0.0260804	-0.0897879	0.633923	0.706406	0.642909	0.817499	0.105286	0.186221	0.00514608	0.0175894	0.00180151	0.971613	0.983622	-0.0217619
WBGene00000160	apb-1	134.817	135.995	135.774	157.617	165.801	163.611	135.165	126.728	121.034	123.369	128.226	127.673	151.374	151.074	150.346	135.802	135.651	137.888	125.908	124.97	125.375	154.752	150.684	144.883	129.164	129.51	129.248	apb-1	0.259452	-0.0868297	-0.100157	0.155438	0.0101221	-0.111579	0.148097	-0.0676609	5.2101e-09	3.85366e-08	0.0111794	0.0739626	0.00437152	0.0128569	0.00170699	0.00703512	0.255595	1.13022e-08	1.03471e-07	-2.55195
WBGene00000161	apa-2	73.0412	74.2005	71.3856	82.0308	82.421	82.7105	71.0739	75.9819	79.7641	68.3031	64.8765	69.0196	86.8226	84.0905	86.1917	74.1334	70.9032	70.6743	70.78	71.053	68.2283	85.3756	82.3893	87.8889	76.4505	73.5566	73.6315	apa-2	0.177273	0.0505308	-0.112327	0.234056	-0.020898	-0.057505	0.224205	0.0328931	4.40395e-05	0.000157475	0.181918	0.412397	0.00615714	0.017197	0.136252	0.246483	0.346384	5.2038e-10	6.0654e-09	-3.0837
WBGene00000162	apd-3	76.5297	73.1576	77.5974	85.0651	82.6427	84.756	70.6893	77.5338	78.1058	83.7099	81.9498	81.8729	93.5345	98.4322	91.9604	88.8606	84.7791	87.9434	83.8772	82.774	79.8042	96.0273	94.8064	92.2066	83.5945	88.948	83.3306	apd-3	0.151596	-0.00863543	0.122654	0.32081	0.201727	0.116749	0.316994	0.17036	0.000466936	0.00134215	0.824571	0.918912	0.0036241	0.0109384	0.00511307	0.0174869	0.198156	1.54534e-05	7.79491e-05	1.61556
WBGene00000163	apb-3	93.0864	91.6867	91.4809	105.715	103.638	104.586	91.0052	98.6946	97.7999	106.122	104.774	107.189	121.9	128.062	126.728	106.18	112.009	110.036	101.775	108.219	108.135	122.665	119.281	120.592	106.97	101.858	109.977	apb-3	0.184593	0.056006	0.203451	0.446871	0.24922	0.201731	0.39193	0.205493	1.28689e-05	5.12838e-05	0.122416	0.326525	3.16588e-06	2.43355e-05	3.35843e-06	3.8858e-05	0.24342	1.03174e-07	7.97428e-07	1.19645
WBGene00000164	apm-3	20.953	20.5424	18.5951	18.1295	17.6598	16.1794	20.9016	22.5617	22.9202	20.2259	20.6743	20.1394	19.8861	20.7829	22.1217	21.2603	23.3846	20.2151	19.9922	21.0513	20.5375	20.3747	20.0595	20.5868	20.9602	21.0859	23.7555	apm-3	-0.207304	0.142791	0.02344	0.061933	0.108122	0.0348361	0.0224611	0.129247	0.00272204	0.00656123	0.0237557	0.118644	0.70727	0.792276	0.572944	0.699289	0.038493	0.539053	0.651795	1.64219
WBGene00000165	aps-3	40.3013	43.3483	39.7927	44.0676	45.2442	44.8054	39.193	33.8861	33.4338	31.0518	31.2045	34.179	41.643	42.2314	39.276	34.0286	33.601	34.8049	32.0654	28.9168	33.1443	38.2387	40.8235	41.4885	36.4635	32.9979	34.9825	aps-3	0.121367	-0.21206	-0.352405	-0.000463384	-0.265943	-0.388347	-0.0340602	-0.240155	0.0317705	0.0570707	0.000646794	0.0145309	1.24093e-06	1.07702e-05	2.12482e-07	4.03738e-06	0.351942	1.38977e-06	8.69144e-06	-0.998685
WBGene00000166	apt-9	1.25092	1.22091	1.22806	1.56669	1.52738	1.32981	1.18634	1.66905	1.60137	1.40056	1.42184	1.34248	1.84394	1.44118	1.5475	1.44653	1.60137	1.27082	1.15771	1.18846	1.44902	1.81817	1.33165	1.33114	1.46724	1.65808	1.77937	apt-9	0.258648	0.247069	0.167647	0.377115	0.210556	0.0249985	0.267345	0.40099	0.118882	0.177647	0.132336	0.341801	0.319472	0.443329	0.882373	0.927388	0.209468	0.198189	0.302989	1.24946
WBGene00000168	apx-1	88.0819	90.8726	87.7577	97.3419	96.2088	99.3119	86.1811	92.6815	86.5626	97.1214	94.589	99.6115	104.395	107.017	104.451	99.079	98.1826	102.952	97.4416	95.4354	97.1661	109.721	102.731	99.1287	99.1713	98.7914	93.0442	apx-1	0.135306	-0.0067162	0.128254	0.244633	0.17174	0.121871	0.22534	0.125977	0.000891006	0.00240281	0.855843	0.934481	0.00157548	0.00529541	0.00237297	0.00923404	0.116379	0.00334245	0.00964739	0.90741
WBGene00000169	aqp-1	53.1173	47.8804	52.6562	13.1036	12.246	13.4987	55.2137	53.5736	56.0792	44.8054	44.0587	45.0564	19.4258	18.8265	18.6018	39.9015	38.3591	38.4713	59.0761	59.2661	58.9548	14.3389	14.1359	13.2524	59.4624	65.6523	63.0744	aqp-1	-1.98285	0.100652	-0.198002	-1.43327	-0.398074	0.206244	-1.87667	0.291256	1.45674e-24	1.60121e-22	0.0172869	0.0978515	5.32598e-05	0.000279361	1.58535e-05	0.000140187	-1.23527	1.50466e-20	1.18242e-18	6.23867
WBGene00000170	aqp-2	65.6859	65.3017	65.6319	42.8768	44.7367	43.5457	64.2742	50.817	48.5049	50.1621	48.3697	53.2977	42.078	41.105	40.1502	55.3229	51.4902	55.2315	45.3699	42.4647	46.4272	35.734	36.694	33.5254	47.3665	44.6905	41.7685	aqp-2	-0.584279	-0.273055	-0.371783	-0.671682	-0.279966	-0.549218	-0.888229	-0.555884	8.94687e-10	7.4738e-09	0.000147689	0.00717525	2.99545e-06	2.31621e-05	3.08177e-09	1.00793e-07	-0.299899	0.000135107	0.000554706	0.80665
WBGene00000171	aqp-3	0.973983	1.29609	1.19181	0.44667	0.401299	0.539892	1.04747	1.01645	1.15931	1.04991	1.18521	1.15263	0.807674	0.62757	0.781823	0.776628	0.973362	1.12962	0.757749	0.67057	0.663592	0.525336	0.51895	0.589117	0.795519	0.545169	1.04526	aqp-3	-1.31434	-0.090181	-0.0126093	-0.637641	-0.240635	-0.704508	-1.07494	-0.575976	1.55781e-05	6.11264e-05	0.610176	0.797661	0.94394	0.964148	0.00216771	0.0085646	-0.625031	0.00470724	0.0130529	49.5691
WBGene00000172	aqp-4	14.2326	14.4853	14.1182	1.38307	1.62518	1.59382	13.7129	11.1471	14.6901	16.5632	17.3326	14.8722	1.15263	1.40056	1.24867	9.19025	8.58337	10.2881	13.7833	14.5558	15.0075	1.50609	1.13279	1.22091	11.6273	11.843	11.4728	aqp-4	-3.24221	-0.129137	0.180814	-3.51071	-0.611353	0.0141819	-3.49583	-0.293772	1.73372e-16	4.31369e-15	0.0935527	0.276221	0.0192026	0.0454286	0.848817	0.906104	-3.69152	5.05541e-17	2.13619e-15	-20.4161
WBGene00000173	aqp-5	0.279805	0.306282	0.151511	0.32204	0.234285	0.210348	0.178866	0.0866407	0.26335	0.140385	0.374786	0.346131	0.28854	0.26335	0.192078	0.204483	0.196961	0.270359	0.134253	0.28854	0.18888	0.342374	0.306282	0.346131	0.222487	0.241803	0.176446	aqp-5	0.115711	-0.572702	0.179731	0.0677642	-0.0698878	-0.299653	0.493087	-0.144674	0.770208	0.821786	0.198324	0.432699	0.65148	0.748149	0.479478	0.618563	-0.111967	0.778931	0.848005	-0.622968
WBGene00000174	aqp-6	0.641366	0.409061	0.447775	0.210348	0.287354	0.308848	0.682401	0.537469	0.75067	0.609498	0.698364	0.842509	0.345064	0.26335	0.252514	0.547709	0.66043	0.299501	0.170646	0.365129	0.549909	0.273059	0.201717	0.423735	0.513777	0.378342	0.386511	aqp-6	-0.937637	0.394361	0.538853	-0.815755	-0.0859678	-0.661159	-0.847031	-0.2346	0.0221734	0.041798	0.191197	0.424186	0.0786452	0.146769	0.077659	0.159346	-1.35461	0.000977934	0.00325922	-2.51387
WBGene00000175	aqp-7	224.31	215.833	232.066	55.7247	60.8301	58.8375	224.014	195.42	194.22	290.88	296.612	289.736	98.4472	94.2668	95.0557	251.828	254.448	261.108	266.666	255.506	261.108	92.571	96.4934	91.5866	211.197	213.617	207.059	aqp-7	-1.94032	-0.133498	0.383989	-1.22369	0.191749	0.221214	-1.25901	-0.0890366	5.27874e-27	1.32864e-24	0.00186941	0.024946	7.40316e-11	1.84199e-09	3.24466e-06	3.76923e-05	-1.60768	6.48283e-26	2.08495e-23	-4.18678
WBGene00000176	aqp-8	22.0022	22.9259	22.4734	6.96946	7.15645	7.76791	22.4895	24.7061	24.1885	20.8062	23.3846	23.8011	8.046	8.62937	8.45043	18.3384	16.7004	17.1356	21.797	22.6625	21.5478	8.73388	9.54808	7.95108	17.2922	17.7736	16.1821	aqp-8	-1.62587	0.0820862	0.013296	-1.42328	-0.373046	-0.030394	-1.35758	-0.394527	5.44266e-19	2.10518e-17	0.135086	0.346075	0.810276	0.872953	0.582233	0.707009	-1.43657	2.41619e-18	1.30723e-16	-108.046
WBGene00000177	aqp-9	5.02644	5.95862	4.93629	3.76066	4.38311	4.15059	4.92736	5.02507	4.60126	4.10344	4.28108	3.66831	5.47858	5.2722	4.21585	4.0558	4.16137	4.00836	5.15541	4.58318	4.52201	4.74808	5.44924	4.48652	5.39625	4.91113	5.01419	aqp-9	-0.370882	-0.117916	-0.398397	-0.08205	-0.370697	-0.145715	-0.103955	-0.046643	0.00110986	0.00292488	0.230715	0.473172	0.000708124	0.00263171	0.148542	0.263318	0.316347	0.00594754	0.016034	-0.79405
WBGene00000178	aqp-10	45.4186	49.4253	49.6263	44.3105	45.2442	43.4705	51.1651	45.4924	41.8596	28.952	30.3347	32.3839	30.5239	34.3153	33.6833	32.5831	34.4435	31.9808	40.0769	37.7905	37.1103	31.8065	32.5646	31.27	38.6309	41.0447	39.3924	aqp-10	-0.116396	-0.0600803	-0.651837	-0.551176	-0.542605	-0.325251	-0.590354	-0.276272	0.0426493	0.0735541	0.276676	0.524958	1.18592e-11	3.50269e-10	3.21531e-06	3.74264e-05	0.100661	0.116949	0.198307	-0.154426
WBGene00000179	aqp-11	41.2435	45.31	44.5651	30.3545	30.4382	28.455	44.9189	38.2387	38.5506	30.205	28.6583	27.7934	22.904	22.4937	22.5844	24.4947	25.9372	26.2542	34.4874	35.4164	35.3202	25.9187	24.3609	25.3621	32.3665	31.8973	32.2708	aqp-11	-0.551617	-0.107035	-0.596886	-0.944641	-0.768465	-0.315388	-0.791569	-0.438948	1.49656e-11	1.65441e-10	0.0331329	0.145378	3.88936e-12	1.23036e-10	6.30793e-07	9.90505e-06	-0.347755	1.33617e-06	8.38339e-06	0.582616
WBGene00000180	arc-1	13.387	13.7539	15.8813	19.0266	19.7879	18.0789	13.972	13.9295	15.8919	15.8778	19.2523	18.4281	20.682	21.6122	22.4422	16.8313	15.1495	16.3521	16.7081	17.407	17.2554	19.3426	20.7476	18.8444	16.6916	14.4465	15.0922	arc-1	0.407427	0.024119	0.317571	0.592737	0.169008	0.258999	0.460388	0.105497	4.72805e-06	2.05795e-05	0.749942	0.877703	0.000178961	0.000799797	0.00147108	0.00622773	0.275166	0.00048103	0.00172944	0.866471
WBGene00000181	ard-1	164.017	163.29	169.971	126.954	130.305	128.583	160.715	147.52	148.059	155.237	164.264	156.234	125.744	132.323	131.086	130.466	132.474	131.933	175.376	175.956	170.812	122.146	127.364	130.038	142.906	144.551	139.794	ard-1	-0.366322	-0.124563	-0.0644715	-0.353979	-0.332254	0.0704826	-0.391012	-0.218809	9.39279e-12	1.07248e-10	0.000660671	0.014658	0.0588003	0.115884	0.0377158	0.0903837	-0.289508	2.06811e-09	2.1702e-08	4.49048
WBGene00000182	arf-1.2	393.784	377.819	390.346	400.109	400.109	396.585	380.773	366.668	361.231	377.082	380.773	371.805	373.971	394.361	371.805	393.027	414.094	424.207	372.334	366.668	371.232	371.805	371.805	351.374	391.079	395.524	387.396	arf-1.2	0.0425425	-0.0678203	-0.0410536	-0.0275843	0.0842855	-0.0656255	-0.0851018	0.014715	0.155012	0.222469	0.0275802	0.129842	0.173455	0.27523	0.0332328	0.0815881	0.0134693	0.652112	0.750065	-0.32809
WBGene00000183	arf-3	340.051	326.78	336.705	361.231	356.581	349.268	338.626	302.279	284.862	276.072	275.465	273.248	307.712	291.251	291.251	285.886	284.862	296.24	285.433	262.664	275.09	289.617	292.648	285.433	300.157	305.575	289.617	arf-3	0.0886448	-0.118887	-0.283111	-0.173286	-0.210689	-0.285469	-0.209461	-0.164853	0.0321624	0.0577148	0.00561262	0.0481355	1.21289e-07	1.42712e-06	9.60866e-08	2.04753e-06	0.109824	0.0119973	0.029276	-0.387919
WBGene00000184	arf-6	45.1058	43.102	45.569	46.5424	45.4406	45.4815	42.1654	34.5725	38.862	34.0251	33.8667	34.7762	35.3894	36.282	38.7464	35.7578	34.116	35.3894	34.3035	34.9578	32.6314	37.3077	39.276	40.5681	36.6723	37.8299	37.806	arf-6	0.0393873	-0.216189	-0.381972	-0.279818	-0.347469	-0.394154	-0.194966	-0.253004	0.420812	0.509818	0.000142788	0.00704488	3.8515e-08	5.24209e-07	1.77134e-08	4.69663e-07	0.102154	0.0622637	0.118463	-0.267439
WBGene00000186	ark-1	62.1678	62.5917	63.1129	67.2911	64.0962	67.0904	59.0761	57.3298	57.1824	59.595	56.7588	60.6711	63.8821	64.9663	62.886	59.3857	59.4083	61.4415	57.1954	57.3118	59.3655	65.7252	65.3948	64.6399	60.1071	58.5877	55.4202	ark-1	0.0796354	-0.113686	-0.0852483	0.0297956	-0.0589022	-0.111896	0.0600156	-0.110024	0.0260768	0.0480913	0.00252555	0.0294977	0.0204402	0.0479257	0.00306	0.0114261	0.115044	0.00260221	0.00774906	-1.34952
WBGene00000187	arl-1	36.3046	37.4394	35.917	40.4509	42.2587	41.037	36.3731	40.2838	39.8065	40.5681	40.5825	38.5393	42.7595	42.078	43.6602	39.6981	39.1604	38.7156	39.2004	39.6195	39.9303	43.4257	41.9793	47.1562	41.0763	38.8753	41.4352	arl-1	0.174136	0.0853007	0.125258	0.22902	0.100252	0.115235	0.268925	0.146579	0.000365031	0.00107686	0.057829	0.20566	0.0076729	0.0207272	0.0127689	0.0371577	0.103762	0.0227558	0.05055	0.828386
WBGene00000188	arl-3	0.700701	0.781823	0.722322	0.471284	0.45035	0.45035	0.781823	0.537469	0.636929	0.311275	0.565771	0.698364	0.436003	0.62757	0.628795	0.511421	0.693904	0.598681	0.819985	0.324738	0.663592	0.742306	0.908736	0.708856	1.04747	0.479036	0.698364	arl-3	-0.660729	-0.17836	-0.52263	-0.39093	-0.274526	-0.335073	0.109158	-0.0578428	0.0494927	0.0833776	0.529102	0.7385	0.112523	0.196146	0.27122	0.411486	0.1317	0.69513	0.783612	-0.251994
WBGene00000189	arl-5	15.4608	16.0293	14.6719	16.4539	14.5164	14.225	15.1815	15.1179	13.0368	15.368	15.4261	15.6101	16.0196	16.0053	17.5275	17.1731	15.37	15.6209	16.4539	16.6187	15.6669	17.0955	17.9475	17.3895	15.6729	15.6977	17.0685	arl-5	-0.0264733	-0.0889112	0.00981464	0.100726	0.0565507	0.0798322	0.185786	0.0694	0.682127	0.747649	0.175331	0.403575	0.87995	0.921103	0.216307	0.347733	0.0909111	0.168104	0.265356	9.26281
WBGene00000190	arf-1.1	1.64279	1.49143	1.40786	2.09849	2.5805	3.00095	1.43259	1.92243	1.79919	2.50403	3.02458	3.16512	1.93783	2.8116	2.32367	16.7741	16.1273	16.6715	1.90069	1.83858	1.91808	2.78963	2.09289	2.60803	7.07857	6.89893	7.44502	arf-1.1	0.730608	0.168455	0.937449	0.62689	3.45578	0.318333	0.707219	2.24301	9.45111e-05	0.00031462	0.330867	0.577504	2.50351e-06	1.97936e-05	0.0691528	0.145944	-0.310558	0.0360423	0.0747131	-0.33128
WBGene00000191	arl-7	0.482202	0.633246	0.819985	1.0822	1.22091	0.884456	0.646365	0.404605	0.934651	0.951955	1.0391	0.629408	0.482202	0.676254	0.721714	2.5882	1.75499	2.20449	0.819985	0.594923	0.626464	0.67057	0.753274	0.953094	1.70091	1.4949	1.641	arl-7	0.764702	-0.0255881	0.433148	-0.0286203	1.79764	0.119218	0.305242	1.38495	0.00743433	0.0160348	0.930378	0.970497	0.128274	0.217214	0.682543	0.78778	-0.461768	0.114116	0.194261	-1.06608
WBGene00000192	arl-8	149.727	144.323	155.884	163.874	163.654	156.124	148.827	142.545	139.392	139.703	139.392	134.093	152.384	152.778	150.128	148.589	145.215	146.081	135.831	134.72	133.514	151.482	146.157	139.23	146.914	147.918	144.282	arl-8	0.10465	-0.0624696	-0.12334	0.0175178	-0.03274	-0.154613	-0.0415898	-0.0347853	0.00314047	0.00746006	0.0655678	0.222579	0.000848522	0.0030784	6.3149e-05	0.000443473	0.140857	0.000211923	0.000830805	-1.14203
WBGene00000193	arl-6	0.222487	0.165854	0.346131	0.32204	0.204483	0.27634	0.151511	0.373631	0.299501	0.204483	0.274186	0.163406	0.12278	0.287354	0.252514	0.129589	0.284702	0.240311	0.539892	0.252514	0.298269	0.273059	0.269248	0.26335	0.324738	0.209236	0.347299	arl-6	0.174777	0.119486	-0.172973	-0.180151	-0.143366	0.574906	0.196055	0.277462	0.673284	0.740317	0.772124	0.891038	0.696286	0.783897	0.153508	0.269726	-0.00717752	0.987425	0.992569	0.041495
WBGene00000195	arr-1	17.168	16.2282	17.6104	17.4972	15.4185	16.0743	16.0839	14.4743	14.9536	14.4905	15.2612	14.1146	15.2633	16.3237	15.2343	14.8778	13.4987	14.63	14.5993	15.3311	14.2326	14.6719	16.0812	14.5239	14.3015	14.086	14.2888	arr-1	-0.0565163	-0.165466	-0.219804	-0.123423	-0.249082	-0.20985	-0.17053	-0.257584	0.327697	0.415046	0.00717607	0.0563922	0.000853443	0.00309366	0.00116936	0.00513095	0.0963813	0.119717	0.202034	-0.438487
WBGene00000196	aars-1	41.9883	42.4558	40.3176	38.7156	36.9409	38.1603	41.6012	41.6497	45.3402	43.6764	44.5605	44.8332	40.9255	41.5304	41.1897	41.9883	46.5424	42.8712	46.6018	45.9121	45.2512	44.2674	42.8212	45.569	43.5996	44.7824	43.5925	aars-1	-0.131244	0.0413094	0.0938755	-0.01234	0.0754536	0.144003	0.0869591	0.0817241	0.00342112	0.00806278	0.310946	0.558563	0.0277009	0.0620591	0.00118717	0.00519725	-0.106216	0.0145193	0.0343677	-1.13145
WBGene00000197	aars-2	377.082	397.355	380.773	376.233	372.334	381.831	376.233	402.158	418.403	406.618	400.109	404.837	376.233	369.793	388.325	411.667	394.361	396.585	418.403	414.482	409.999	400.983	409.999	392.199	430.349	422.347	429.678	aars-2	-0.0305666	0.0497134	0.0696073	-0.0261198	0.0578266	0.106572	0.0599674	0.151483	0.322562	0.409378	0.109893	0.305203	0.0293934	0.0651055	0.0014275	0.00607185	-0.0957272	0.00395543	0.0111734	-1.37525
WBGene00000198	art-1	218.16	220.371	227.12	162.35	163.874	171.022	219.546	188.623	188.181	166.373	171.724	179.34	158.899	155.669	150.504	175.885	178.372	183.305	182.519	169.423	176.777	141.953	142.629	135.528	189.798	192.929	187.307	art-1	-0.421164	-0.161048	-0.362702	-0.516676	-0.307229	-0.331319	-0.662507	-0.223295	1.04878e-10	1.00965e-09	0.000588666	0.0138061	2.68155e-09	4.79613e-08	1.44127e-08	3.92944e-07	-0.153974	0.00152288	0.0048236	0.424519
WBGene00000199	arx-1	80.9032	86.1811	86.2022	92.744	101.715	101.427	86.6788	93.3403	94.8803	94.076	92.7313	96.7515	105.988	105.242	103.359	96.7718	98.9193	98.3188	88.2416	95.2668	89.6104	105.267	103.28	103.748	96.4686	99.9182	96.9274	arx-1	0.222616	0.117704	0.164656	0.314411	0.216982	0.108096	0.303626	0.213174	3.28601e-06	1.47387e-05	0.00502689	0.0448622	0.000225649	0.000983648	0.0096225	0.029436	0.149756	0.000545021	0.00193527	0.909508
WBGene00000200	arx-2	130.747	132.93	135.231	169.152	170.495	172.274	138.887	128.649	127.797	136.164	133.488	130.932	159.091	157.965	161.265	141.48	138.333	137.693	130.466	131.711	132.323	156.412	154.415	153.666	132.581	132.145	132.899	arx-2	0.359932	-0.0131394	0.00574227	0.262006	0.0653196	-0.0159439	0.22008	-0.00436133	3.04824e-13	4.3715e-12	0.651004	0.821656	0.844329	0.896464	0.585222	0.709497	0.256263	1.01776e-09	1.12368e-08	44.6275
WBGene00000201	arx-3	112.142	108.703	111.121	134.543	138.765	142.821	115.562	90.7248	82.4999	78.8499	79.5022	83.4242	99.4214	96.702	95.116	92.6058	91.6408	89.0835	81.5133	84.1211	78.6703	98.7914	97.9799	94.4503	86.0361	88.0819	83.1057	arx-3	0.324428	-0.212834	-0.45679	-0.188897	-0.281547	-0.443261	-0.188126	-0.368206	1.03113e-05	4.18833e-05	0.00199833	0.0256087	1.02962e-07	1.23491e-06	1.53368e-07	3.05803e-06	0.267893	0.000325116	0.00122096	-0.586469
WBGene00000202	exos-4.2	43.6177	44.7899	44.8987	44.1047	43.0043	43.6313	46.7851	41.5562	44.8419	39.6981	42.8824	43.2991	47.9493	45.2274	43.8696	42.6711	42.6793	42.9157	42.8548	42.543	42.036	43.8423	42.2587	47.7325	42.1497	42.3491	43.8195	exos-4.2	-0.0270664	-0.002754	-0.0821375	0.040322	-0.0549081	-0.0642399	0.000556669	-0.0548883	0.549807	0.632642	0.950885	0.979305	0.0812317	0.150737	0.163932	0.283765	0.12246	0.0119495	0.0291879	-1.49091
WBGene00000203	arx-5	44.6855	46.5608	47.1054	60.301	57.5125	56.8651	47.3665	37.0021	39.1769	41.1799	41.5008	40.5167	47.9493	49.7755	48.5368	46.4272	44.1128	44.4282	41.2383	41.5248	41.8368	47.4524	49.2959	43.309	40.9433	44.0384	40.9051	arx-5	0.338221	-0.168744	-0.166539	0.0813361	-0.0366178	-0.150013	0.0208153	-0.135429	1.1425e-06	5.62251e-06	0.00632551	0.0517453	0.00784356	0.0210996	0.0144624	0.0410808	0.247875	0.000205589	0.000807979	-1.48839
WBGene00000204	arx-6	60.0178	59.5001	60.4402	59.2488	59.6726	59.2227	59.9165	49.9524	49.4432	50.0922	48.6473	50.3339	48.8322	48.8958	49.1152	47.9901	48.4244	49.0119	51.3594	50.4405	48.3632	46.5682	49.8494	48.1485	47.7261	49.1938	44.6806	arx-6	-0.0147119	-0.17952	-0.271155	-0.293325	-0.30652	-0.260701	-0.315939	-0.346231	0.756788	0.811032	0.000749367	0.0153332	5.79094e-06	4.10495e-05	9.05442e-06	8.83416e-05	-0.0221696	0.661454	0.757799	0.0817597
WBGene00000205	arx-7	32.8321	32.8711	32.2773	40.7814	38.6656	40.1348	33.0662	23.9591	24.746	26.0878	25.231	26.2512	31.0577	33.716	32.1066	26.5161	27.4781	29.9102	21.3976	25.2202	23.1287	31.0716	31.2855	26.6621	24.643	27.3553	24.1483	arx-7	0.287874	-0.272352	-0.335185	-0.0163588	-0.220062	-0.497009	-0.134716	-0.36394	0.000582525	0.0016386	0.00172083	0.0237375	0.000290552	0.00122091	1.54785e-06	2.0678e-05	0.318826	0.000538829	0.00191659	-0.951195
WBGene00000206	asb-1	307.365	295.195	294.311	295.57	291.982	288.526	298.644	274.474	280.841	275.09	280.144	268.843	264.67	264.055	264.67	272.942	270.994	270.353	268.843	272.942	278.441	275.465	274.474	269.226	264.878	272.942	280.841	asb-1	-0.0337273	-0.0715311	-0.12284	-0.176996	-0.139684	-0.129449	-0.130528	-0.132276	0.247421	0.329496	0.0181281	0.101102	0.000206586	0.000908298	0.000105291	0.000680282	-0.0541561	0.074392	0.137006	0.440869
WBGene00000207	asb-2	294.141	287.215	297.181	209.727	228.681	226.593	294.48	243.887	243.683	262.664	270.353	272.942	226.049	222.953	228.597	281.854	280.541	278.441	275.465	270.994	272.942	199.336	196.916	180.495	267.031	268.843	263.413	asb-2	-0.404184	-0.17259	-0.124315	-0.374974	-0.0635872	-0.100384	-0.606612	-0.13644	1.71151e-09	1.36098e-08	0.000735366	0.0152437	0.0112935	0.0288136	0.0360246	0.0869547	-0.250658	1.07422e-05	5.62094e-05	2.01631
WBGene00000208	asc-1	43.9901	45.6411	50.0406	58.6511	55.0681	59.1375	49.5309	42.6628	39.838	44.4187	43.319	45.3621	55.9626	54.3876	54.6255	54.8798	52.4414	54.641	44.6265	45.2615	44.1813	51.5344	54.1424	50.8248	46.6847	46.8303	47.0695	asc-1	0.31008	-0.0814411	-0.0661066	0.242773	0.215525	-0.0565188	0.167837	0.0120786	1.73884e-06	8.28946e-06	0.13697	0.348688	0.230709	0.345084	0.299507	0.441219	0.30888	3.11993e-06	1.81825e-05	-4.67245
WBGene00000209	asg-1	157.308	155.134	164.542	156.502	158.668	160.715	171.128	123.919	130.97	128.82	135.911	122.931	127.321	119.457	123.369	131.008	131.204	128.983	139.102	127.868	126.885	130.074	126.685	120.278	137.146	130.561	134.747	asg-1	-0.00343922	-0.175974	-0.300948	-0.366064	-0.28597	-0.275638	-0.338059	-0.245184	0.957865	0.969137	0.0113379	0.0745241	9.34946e-05	0.000454697	0.000245469	0.00137253	-0.0651152	0.344529	0.464668	0.216367
WBGene00000210	asg-2	129.063	124.813	131.204	94.311	99.2565	94.1833	136.664	90.6604	90.6018	102.029	104.933	102.686	87.3447	83.4667	88.7079	107.426	107.017	108.926	112.312	100.385	106.337	74.8197	73.649	64.0048	109.81	109.173	104.423	asg-2	-0.420795	-0.30138	-0.314301	-0.569863	-0.251453	-0.270753	-0.855711	-0.251814	2.95544e-05	0.000109697	0.00117697	0.0195558	0.000883543	0.00318719	0.00312921	0.0116395	-0.255562	0.00699275	0.0184396	0.813111
WBGene00000211	asm-1	9.33587	10.391	9.61259	5.83525	7.03212	6.31621	8.88941	10.8138	10.6092	8.69282	8.8744	9.36988	6.19184	7.44125	7.26291	8.78087	9.75265	8.61028	9.85679	8.32718	8.86712	6.74728	6.99299	8.79078	8.08835	9.34866	9.6597	asm-1	-0.621295	0.0433255	-0.118783	-0.492759	-0.110736	-0.111039	-0.401556	-0.11548	1.48463e-06	7.16012e-06	0.633911	0.812302	0.219202	0.331668	0.243776	0.380998	-0.373977	0.000997419	0.00331779	3.14841
WBGene00000212	asm-2	19.0099	20.2679	19.7915	5.61999	5.22532	4.97771	22.9213	24.3521	24.675	13.3894	12.6981	12.7278	3.2457	3.2549	3.15256	18.7202	18.9597	16.8211	21.2913	20.6328	19.0913	5.35478	5.07101	5.91854	24.3352	24.1782	24.5296	asm-2	-1.89968	0.284927	-0.606268	-2.61654	-0.120546	0.0487389	-1.86573	0.30849	3.03293e-20	1.43915e-18	3.83434e-06	0.000842924	3.53557e-11	9.31208e-10	0.353662	0.498139	-2.01027	1.26818e-18	7.42191e-17	3.31581
WBGene00000213	asm-3	88.3869	92.8624	92.7313	4.67463	4.21114	4.15059	124.761	109.754	110.89	4.02125	4.07501	4.26875	2.43714	2.00622	1.82806	13.1854	10.8197	12.6595	34.5437	28.7463	31.9808	5.90222	5.47748	5.41867	79.1973	71.1007	74.5582	asm-3	-4.37901	0.333304	-4.45619	-5.43794	-2.90458	-1.51997	-4.01584	-0.285473	6.70894e-24	6.31278e-22	1.6918e-07	7.94096e-05	1.98613e-23	5.8463e-21	6.69168e-21	2.0037e-18	-0.981747	5.24502e-06	2.92143e-05	0.220311
WBGene00000214	asp-1	1757.07	1873.28	1873.28	1026.6	1031.22	1087.4	1825.64	1379.55	1360.91	2210.47	2210.47	2624.03	1228.76	1240.3	1192.57	3211	3211	3371.65	1618.16	1691.14	1654.9	478.082	491.396	431.201	2210.47	2210.47	2037.76	asp-1	-0.806551	-0.280032	0.354424	-0.586256	0.832728	-0.148256	-1.97188	0.231207	6.07533e-12	7.17757e-11	0.000376642	0.0112006	1.44007e-05	8.98986e-05	0.0408658	0.0966916	-0.94068	9.15667e-14	2.07332e-12	-2.65411
WBGene00000215	asp-2	380.773	379.656	396.585	139.542	140.833	141.636	392.199	357.224	342.558	444.243	440.363	432.304	127.947	125.972	133.056	331.857	337.118	322.66	456.834	445.412	444.243	104.325	106.7	105.715	310.467	323.363	320.707	asp-2	-1.45502	-0.0845148	0.18662	-1.58075	-0.222911	0.219329	-1.86883	-0.277475	1.87989e-26	3.62756e-24	0.0156341	0.0916631	3.78021e-06	2.84203e-05	2.3177e-07	4.33745e-06	-1.76737	1.00231e-28	7.25297e-26	-9.47044
WBGene00000216	asp-3	599.948	622.893	644.345	241.074	233.501	238.538	606.737	583.151	565.454	502.964	508.943	513.599	234.183	232.714	234.824	520.472	541.948	523.792	570.408	561.556	549.598	134.782	139.392	129.063	575.714	597.72	604.951	asp-3	-1.38713	-0.0881465	-0.290363	-1.41067	-0.234166	-0.149891	-2.20889	-0.0696745	1.06647e-27	3.85863e-25	0.00445217	0.0414173	9.14596e-11	2.22774e-09	1.49708e-05	0.000133927	-1.12031	5.99969e-25	1.40806e-22	3.85829
WBGene00000217	asp-4	432.304	446.713	437.731	434.424	437.731	429.678	436.453	457.945	474.346	265.627	268.396	251.374	249.458	250.749	264.67	351.99	344.919	341.501	305.575	316.381	300.706	393.784	395.227	442.855	365.052	357.878	395.524	asp-4	-0.0160601	0.0548165	-0.746926	-0.784777	-0.343132	-0.513723	-0.100266	-0.23688	0.679226	0.744987	0.161779	0.384933	2.62101e-17	2.19899e-15	2.03729e-13	1.7479e-11	-0.0378506	0.375912	0.496839	0.0506752
WBGene00000218	asp-5	414.482	431.201	446.713	65.6319	68.344	70.8373	440.363	339.385	330.428	463.621	489.674	496.05	64.0048	61.3441	64.3314	527.489	543.603	508.943	441.594	400.983	427.857	42.6006	41.1361	39.043	383.521	380.773	367.567	asp-5	-2.65771	-0.228706	0.166325	-2.76712	0.289962	-0.0234699	-3.39152	-0.190344	5.98056e-25	7.31439e-23	0.000689054	0.0148768	0.00890131	0.0234581	0.696597	0.798492	-2.93345	4.77757e-26	1.6283e-23	-17.6368
WBGene00000219	asp-6	875.119	875.119	894.774	239.124	241.71	244.679	807.108	677.914	677.914	1104.35	1065.84	1087.4	294.311	275.278	274.474	1285.73	1350.56	1295.3	853.199	865.917	870.728	154.636	160.184	140.877	792.084	790.078	775.575	asp-6	-1.86587	-0.294091	0.300451	-1.6478	0.571796	-0.0305725	-2.53582	-0.165746	2.53849e-26	4.69e-24	1.17963e-07	6.0255e-05	5.1411e-08	6.78462e-07	0.467224	0.608495	-1.94825	3.8062e-27	2.06569e-24	-6.48441
WBGene00000220	atf-2	3.13111	3.22755	2.8929	1.5772	1.46407	1.5609	3.14418	3.56787	3.20933	4.02125	3.15256	3.35966	2.06242	2.31873	1.4085	4.01807	3.3636	4.18401	2.94995	3.2457	3.15256	2.33053	1.302	2.01707	3.52134	3.03438	3.86444	atf-2	-1.005	0.102306	0.179539	-0.691876	0.318156	0.0119923	-0.762854	0.16456	7.87879e-06	3.28447e-05	0.468555	0.698429	0.212559	0.323363	0.933743	0.960299	-0.871415	1.37153e-05	6.98514e-05	-4.85363
WBGene00000221	atf-5	44.4187	42.2096	46.0626	24.8676	26.0945	26.3396	47.0326	40.988	41.6972	28.8153	29.8305	27.3519	23.9739	25.9372	23.3961	32.964	32.6197	33.2875	31.0469	29.6384	32.0235	24.0384	24.7014	26.8704	39.3247	39.3993	36.9322	atf-5	-0.782034	-0.0343373	-0.628634	-0.856016	-0.424398	-0.517183	-0.817302	-0.198471	1.55585e-14	2.79136e-13	0.48662	0.710358	2.3982e-12	7.88816e-11	1.07345e-10	4.88026e-09	-0.227382	0.000515373	0.00184204	0.361708
WBGene00000222	atf-6	16.1901	16.6789	16.2789	19.1345	19.9191	18.007	14.9117	19.0872	16.8402	19.0663	17.8624	18.9985	21.0093	21.0407	21.6876	19.339	19.0435	18.4007	16.9766	17.1634	17.7095	21.4521	20.9016	20.2108	18.5951	19.6683	16.9985	atf-6	0.215423	0.0421524	0.187385	0.375004	0.206812	0.0771562	0.350513	0.168592	0.00217753	0.00536033	0.520211	0.732607	0.00728088	0.0198069	0.245582	0.383097	0.187619	0.00578691	0.0156593	1.00125
WBGene00000223	atf-7	198.052	195.42	200.745	198.473	197.166	196.916	200.745	235.74	227.606	246.776	243.887	250.926	221.791	220.08	224.31	237.036	230.102	239.799	231.613	237.036	234.426	224.823	221.978	237.277	232.066	233.967	241.472	atf-7	-0.00401094	0.156385	0.319771	0.164669	0.250388	0.242246	0.201286	0.251398	0.916721	0.938223	0.000265101	0.00947407	2.67187e-09	4.78375e-08	5.17804e-07	8.41226e-06	-0.155102	0.000274125	0.001047	-0.485042
WBGene00000224	atgp-1	43.4381	44.5454	45.9785	35.1163	34.4172	33.7327	42.0842	47.3883	46.9782	48.0176	43.6177	45.2937	36.7536	38.232	36.7186	47.7409	46.4096	44.9942	46.0144	46.0913	45.3621	36.419	35.3671	34.4104	48.1567	49.1938	46.8224	atgp-1	-0.373901	0.024243	0.0310008	-0.261086	0.0531815	0.038083	-0.333184	0.106823	3.95439e-09	2.98981e-08	0.572064	0.769657	0.477173	0.599166	0.379688	0.524502	-0.292087	3.81402e-07	2.64318e-06	-9.42191
WBGene00000225	atgp-2	34.3199	37.6293	36.5785	20.6298	21.2529	22.564	33.7413	34.7865	36.731	39.6195	38.41	38.2844	22.8068	22.3556	23.8712	33.3033	34.0251	36.1985	35.7429	36.1985	33.2875	25.5342	24.9144	24.8248	36.186	34.4564	35.5332	atgp-2	-0.752967	-0.0437966	0.102045	-0.652232	-0.0633714	-0.0427187	-0.525236	-0.0293513	4.60942e-15	8.97442e-14	0.334116	0.580783	0.0298131	0.0658901	0.350098	0.49443	-0.754277	2.64104e-15	7.86739e-14	-7.39165
WBGene00000226	atl-1	147.953	149.109	141.134	142.327	141.536	132.474	145.087	173.511	176.368	184.253	177.892	169.086	163.086	163.752	172.017	173.038	169.971	165.263	176.897	177.746	179.05	177.892	177.002	204.076	163.696	156.124	174.48	atl-1	-0.0734965	0.169489	0.276511	0.186678	0.213411	0.284915	0.345686	0.172498	0.207209	0.284075	0.00516516	0.0456506	3.2483e-05	0.000181568	2.02037e-05	0.000170577	-0.0898327	0.117998	0.199694	-0.324879
WBGene00000227	atm-1	64.5966	62.5917	58.5661	68.9797	68.436	73.0412	60.0981	70.1214	74.1111	95.6979	99.2223	100.869	98.2543	97.611	96.7515	83.9996	85.0823	84.378	86.9317	93.8198	89.0835	95.5863	94.4184	99.498	79.2665	79.0663	76.9576	atm-1	0.179641	0.130402	0.672368	0.656761	0.449429	0.537548	0.639489	0.341971	0.00136897	0.00353845	0.0153373	0.0907852	5.66826e-14	2.43063e-12	1.28642e-11	7.23015e-10	-0.015607	0.742665	0.821136	-0.023212
WBGene00000228	atn-1	203.524	204.076	194.547	166.916	177.074	174.56	194.711	229.942	226.345	210.918	220.795	216.035	170.448	167.534	168.739	283.91	283.556	279.387	212.98	206.408	206.758	181.387	185.165	188.467	211.787	215.295	215.934	atn-1	-0.216661	0.108115	0.105447	-0.248668	0.492128	0.0570982	-0.118017	0.0950715	1.00173e-05	4.08767e-05	0.0105938	0.0713111	0.0131352	0.0328135	0.162186	0.281476	-0.354115	1.64601e-09	1.75591e-08	-3.35823
WBGene00000229	atp-2	1825.64	1852.01	1691.14	1930.72	1873.28	1873.28	1757.07	2005.1	2037.76	2731.74	2731.74	2731.74	2345.38	2210.47	2484.5	2731.74	2731.74	2731.74	2345.38	2210.47	2345.38	2037.76	2005.1	2005.1	2345.38	2345.38	2345.38	atp-2	0.0821689	0.108748	0.61149	0.389867	0.611493	0.363637	0.173202	0.391491	0.0514746	0.0862811	0.0114949	0.074965	2.63106e-15	1.47876e-13	6.59092e-10	2.55501e-08	-0.221623	4.19154e-06	2.3789e-05	-0.36243
WBGene00000230	atp-3	409.999	402.158	432.304	386.717	402.158	388.325	417.081	399.307	412.771	460.469	465.992	449.817	418.403	435.766	424.745	460.469	470.283	464.774	463.621	444.243	445.412	373.028	376.233	382.588	453.846	451.195	455.294	atp-3	-0.0802527	-0.0177425	0.145206	0.0397934	0.165952	0.121781	-0.136837	0.128864	0.006591	0.0144345	0.519044	0.731973	1.04142e-05	6.77136e-05	0.000107457	0.000691734	-0.105413	0.000581539	0.00205485	-0.725953
WBGene00000231	atx-2	274.096	263.413	267.362	316.381	306.723	316.793	268.843	298.218	298.985	331.857	323.363	357.224	383.521	363.617	346.673	347.734	346.673	368.997	324.909	320.184	325.582	348.649	357.224	305.575	339.385	339.385	309.143	atx-2	0.223549	0.103059	0.330517	0.441507	0.401889	0.270086	0.328815	0.294222	0.000104187	0.000343344	0.0474703	0.18163	2.91211e-07	3.05033e-06	7.72957e-06	7.77298e-05	0.110989	0.0301214	0.0641941	0.335805
WBGene00000232	avr-14	5.52685	5.04432	5.53385	5.07032	4.45454	4.67463	5.05803	5.15855	5.8129	5.36672	5.20167	5.61999	5.26189	5.29918	4.97142	5.20612	5.34847	5.4649	5.48749	6.4588	4.82049	4.42398	5.77251	5.95424	6.14617	5.53559	5.58637	avr-14	-0.180375	-0.0147283	0.00747915	-0.052436	-0.00672371	0.042111	-0.0173741	0.0977087	0.0851177	0.133403	0.880458	0.94622	0.940445	0.962219	0.668538	0.776467	-0.0599151	0.55743	0.668603	-8.01095
WBGene00000233	avr-15	11.3367	11.2193	10.5263	10.7363	9.78167	9.11154	11.5167	11.2388	12.3945	11.4295	10.9899	12.8814	11.1835	10.9353	9.94873	11.4369	12.3782	11.5859	10.6312	11.3883	11.8242	10.2881	9.49584	10.9841	12.6065	12.2504	11.7218	avr-15	-0.156082	0.0844687	0.0952606	-0.0436848	0.0988484	0.0291188	-0.111378	0.145144	0.0413673	0.0716706	0.236026	0.479429	0.191447	0.297953	0.684868	0.789781	-0.138945	0.0648014	0.122487	-1.45858
WBGene00000235	baf-1	79.8905	72.7968	83.6288	101.775	99.9693	104.167	83.7241	67.619	66.6347	72.0411	73.6315	71.0226	85.1679	82.9251	80.6408	94.8592	95.9576	103.805	65.5346	66.9896	67.6911	79.4369	83.9113	80.5727	81.2414	84.4445	79.489	baf-1	0.37304	-0.121277	-0.12432	0.0750795	0.319923	-0.238486	0.0470855	0.0539895	2.58295e-07	1.4373e-06	0.0431434	0.170436	0.04098	0.0858194	0.000322684	0.00172379	0.1994	0.00185554	0.00576169	-1.60392
WBGene00000236	bag-1	46.6604	47.1993	50.4105	42.4004	41.7486	43.2564	47.6301	44.9291	44.4187	46.4687	43.0166	42.5913	42.6094	43.3838	43.4336	47.315	51.9424	51.4648	44.7824	42.6515	44.815	45.9897	44.1813	45.0765	46.3583	46.4448	46.7778	bag-1	-0.178415	-0.0736129	-0.128429	-0.155684	0.0660604	-0.123667	-0.0921745	-0.0467001	0.000192248	0.000598882	0.0826653	0.256687	0.00467708	0.0136218	0.0058292	0.0194984	-0.0272553	0.527665	0.641195	0.212222
WBGene00000237	bam-2	25.5496	21.9901	23.897	27.6436	28.3444	26.0683	22.6575	25.7399	24.5233	21.2566	20.556	20.9337	29.4172	28.8391	30.3027	27.0953	27.043	26.3396	22.7806	22.9892	22.5342	27.749	25.8397	31.3069	23.3613	23.7761	25.0835	bam-2	0.199216	0.0266013	-0.188292	0.308479	0.170226	-0.0657231	0.237321	0.0140932	0.0017375	0.00438209	0.651715	0.821956	0.00464554	0.0135481	0.279055	0.419779	0.49677	5.20938e-09	5.08837e-08	-2.6383
WBGene00000238	bar-1	13.5247	13.9685	14.7402	12.0526	12.0526	11.2821	14.4853	15.3286	14.9536	15.4923	13.8867	15.1742	11.8747	13.2608	12.4575	15.2664	14.11	16.0566	14.7023	13.4075	14.484	11.8719	13.7893	13.1543	14.7439	13.8695	15.0297	bar-1	-0.252371	0.0851927	0.0782862	-0.166776	0.106224	0.0157453	-0.123215	0.0474597	0.000636521	0.00177439	0.180054	0.41024	0.22635	0.339906	0.805068	0.877415	-0.245063	0.000801757	0.00273075	-3.13034
WBGene00000239	bas-1	29.2996	34.0543	32.0103	25.4644	27.295	25.1543	32.3623	30.3294	31.8457	21.2566	22.5617	22.2432	23.1332	22.4937	22.4422	15.4391	14.4231	15.9134	31.4903	30.2787	30.0797	23.3547	24.2937	25.4353	26.9781	28.4127	26.3606	bas-1	-0.288011	-0.00775783	-0.524495	-0.481052	-1.0549	-0.0475821	-0.382244	-0.216783	4.18096e-06	1.83825e-05	0.874078	0.942806	1.28764e-10	3.05082e-09	0.341568	0.485435	0.0434431	0.442662	0.562723	-0.0828284
WBGene00000240	pah-1	99.4015	101.802	94.4843	64.6911	64.587	63.7543	98.052	85.2721	94.589	85.8843	83.6624	83.8141	54.7106	54.6703	57.3788	71.3001	69.1761	71.7791	95.9147	92.3261	92.7568	62.683	59.4777	65.6523	82.74	80.8862	84.5282	pah-1	-0.614344	-0.0914126	-0.222345	-0.826808	-0.477753	-0.0720475	-0.657733	-0.25237	1.04576e-14	1.92391e-13	0.0295652	0.1358	7.87056e-06	5.33313e-05	0.0827889	0.167464	-0.604462	4.16246e-14	1.0153e-12	2.71857
WBGene00000241	bbs-1	0.84371	0.67057	0.580219	0.541228	0.567005	0.513777	0.781823	0.47777	0.525336	0.513777	0.698364	0.629408	0.623883	0.729335	1.03084	0.511421	0.409693	0.44407	0.669264	0.594923	0.513777	0.44916	0.833198	0.547709	0.760427	0.741324	0.454863	bbs-1	-0.357644	-0.247678	-0.183339	0.151263	-0.619816	-0.225685	-0.222937	-0.119798	0.187252	0.261121	0.338733	0.58477	0.48545	0.60662	0.388453	0.533011	0.334602	0.203621	0.309359	-1.82505
WBGene00000242	bbs-2	0.671813	0.559924	0.722322	0.842509	0.671813	0.62757	0.511421	0.842509	0.75067	0.814351	0.629408	0.842509	0.671813	0.754237	0.628795	0.62757	0.879465	0.772963	0.481012	0.557617	0.549909	0.631653	0.87529	0.75067	0.724271	0.573975	0.909262	bbs-2	0.136926	0.0723802	0.223176	0.075188	0.225976	-0.302634	0.199785	0.145872	0.546302	0.629612	0.748541	0.877008	0.3276	0.45208	0.227702	0.361703	-0.147988	0.514644	0.628893	-0.6631
WBGene00000244	bbs-8	0.973983	0.884456	0.884456	0.842509	0.623883	0.684565	0.913106	0.814351	1.00566	1.04991	0.86597	1.00214	0.728255	0.729335	0.898	0.776628	0.943338	0.793842	0.935404	0.826354	0.733426	1.08916	1.00664	0.911899	1.25337	0.636929	1.07803	bbs-8	-0.347701	-0.0169748	0.0854621	-0.233321	-0.127778	-0.136109	0.136614	0.04903	0.120143	0.179193	0.9323	0.971191	0.672612	0.765131	0.515337	0.649435	-0.318783	0.142065	0.232584	-3.73011
WBGene00000245	bca-1	22.3614	22.0347	20.8251	15.9661	18.3542	17.4218	18.2538	21.9291	19.4479	27.3601	27.9197	27.8248	20.4637	19.511	19.8024	25.0383	23.1411	23.7897	26.2481	26.4702	25.7459	18.8135	17.5449	16.5268	22.3017	22.6739	24.7716	bca-1	-0.340495	-0.132689	0.35016	-0.125802	0.139008	0.266941	-0.300626	0.0949494	6.93366e-06	2.91708e-05	0.0340013	0.147463	1.27394e-06	1.10189e-05	6.85703e-05	0.000476154	-0.475963	7.70104e-09	7.30443e-08	-1.35927
WBGene00000246	bcc-1	4.25408	5.08114	3.8929	6.88969	7.15645	6.06161	5.05803	4.91469	5.41867	5.08114	4.81452	4.43837	6.31289	6.00481	6.77545	4.49307	4.00637	4.57036	5.78283	5.72331	4.52201	5.8672	6.79011	8.08835	4.79015	4.53089	5.24488	bcc-1	0.619531	0.22981	0.123194	0.541669	-0.00739319	0.285435	0.640548	0.149711	5.46543e-06	2.3483e-05	0.0551699	0.199695	0.310217	0.433315	0.0195153	0.0527917	0.418475	0.000965593	0.00322427	3.39687
WBGene00000247	bec-1	27.6041	26.9645	27.8248	34.4763	34.116	34.4435	27.6784	28.8549	28.2992	33.6764	33.8667	33.6245	34.8371	37.6219	35.8867	40.9433	40.312	39.3854	31.2288	30.1245	30.5561	36.3804	35.6191	37.8234	32.2201	34.6345	36.405	bec-1	0.322389	0.0414342	0.295681	0.394495	0.548338	0.158223	0.411839	0.323224	2.53987e-08	1.67718e-07	0.346814	0.591836	1.57891e-07	1.79221e-06	0.000999726	0.00451436	0.0988141	0.0242243	0.0532333	0.334191
WBGene00000248	ben-1	48.5134	52.1752	49.3264	54.9597	50.9072	53.2262	51.8775	52.6194	46.2678	46.8382	44.9515	46.0701	46.9078	43.0166	47.9445	52.6813	52.3615	50.6248	46.2778	47.4878	49.5399	47.3487	47.4066	50.1435	45.7435	46.6604	46.392	ben-1	0.0873928	0.00900963	-0.120267	-0.122928	0.0538586	-0.0656777	-0.0507959	-0.110281	0.066162	0.1072	0.845425	0.929683	0.0163801	0.0396754	0.168366	0.289277	-0.00266086	0.956073	0.974077	0.0221246
WBGene00000249	bir-1	29.7014	31.0177	30.9507	27.4324	26.4702	29.0527	31.8668	26.6621	26.6501	23.8712	24.43	24.6293	23.6513	25.516	23.1262	23.7848	25.9728	25.9489	25.3061	22.6972	24.3309	24.3844	22.8399	22.1602	27.7419	27.1687	25.0835	bir-1	-0.143785	-0.107359	-0.326929	-0.340073	-0.271035	-0.337607	-0.39733	-0.195593	0.0213038	0.0403647	0.0758222	0.244169	1.09542e-05	7.06432e-05	5.8979e-06	6.22289e-05	-0.0131442	0.83787	0.891732	0.0402051
WBGene00000250	bir-2	31.2045	35.917	34.0605	36.9409	35.2096	37.223	34.179	26.6621	23.1633	27.4128	24.7293	29.4977	29.6552	30.6322	28.8549	28.3132	27.4432	27.8336	26.5274	27.3218	25.7459	29.261	28.9379	29.5885	26.2115	24.4581	25.4682	bir-2	0.117658	-0.275444	-0.304347	-0.176764	-0.270921	-0.34149	-0.199811	-0.405534	0.128024	0.189176	0.00146173	0.0218588	0.000712501	0.00264458	0.000190161	0.00110823	0.127583	0.130058	0.216187	-0.419203
WBGene00000251	bli-1	21.7244	17.5408	19.5207	19.5749	24.4803	24.0045	17.2017	22.2181	20.6862	22.1565	28.373	26.7628	22.2373	23.7672	22.8399	18.4487	21.0859	19.1107	24.5448	23.5544	26.0642	21.1376	22.3614	20.2108	22.7046	19.6445	19.912	bli-1	0.197094	0.0229009	0.389394	0.228287	-0.00235919	0.335182	0.11888	0.0802415	0.0463838	0.0789675	0.813029	0.912963	0.000270666	0.00114959	0.00124378	0.00540019	-0.161107	0.0904892	0.161199	-0.413738
WBGene00000252	bli-2	7.48993	5.54253	6.66567	9.32578	13.0288	12.1122	6.0074	7.22834	7.84073	9.12931	12.1985	9.74957	12.3011	12.4847	11.2371	6.13384	8.76285	8.48537	9.20793	9.08052	9.38218	8.05886	8.92555	7.15122	8.563	6.89893	8.53766	bli-2	0.781677	0.0863357	0.645659	0.87218	0.250018	0.492199	0.298935	0.277667	3.61932e-06	1.61171e-05	0.557532	0.759365	7.07113e-05	0.000356383	0.00149205	0.00630165	0.226521	0.0789541	0.143852	0.350837
WBGene00000253	bli-3	31.7005	31.7177	30.0924	35.4479	38.0672	37.4341	30.7009	37.2618	37.3322	31.9035	33.737	31.863	41.1361	42.9267	42.6515	31.6891	34.9091	33.0073	31.3263	29.9828	33.1443	39.4122	39.864	41.643	32.4383	33.1858	33.969	bli-3	0.244656	0.163612	0.0594376	0.43875	0.0926404	0.0143623	0.369121	0.0910248	0.00015541	0.000494504	0.00693155	0.0550435	0.312253	0.435434	0.804833	0.877358	0.379312	2.33268e-07	1.67611e-06	6.38168
WBGene00000254	bli-4	234.183	232.714	232.617	254.616	263.413	256.945	228.597	253.474	257.824	263.055	262.397	258.766	282.744	287.884	286.909	258.019	264.365	258.766	258.766	263.055	256.128	271.325	270.353	274.285	265.627	269.952	264.055	bli-4	0.147244	0.0780759	0.164601	0.293754	0.159264	0.152998	0.221795	0.192972	4.33875e-05	0.000155427	0.0161166	0.093549	9.62618e-06	6.3305e-05	2.59829e-05	0.000209784	0.129152	0.000202442	0.000797053	0.784639
WBGene00000255	bli-5	0.816639	1.37016	0.722322	1.52494	1.43741	1.50016	0.876408	0.67057	0.636929	0.643159	0.833198	0.814351	1.34749	1.47233	1.4621	0.511421	0.567005	0.479036	0.59979	0.785398	0.951955	1.05608	1.33165	1.49591	0.866587	0.636929	0.48903	bli-5	0.698224	-0.351047	-0.280489	0.635423	-0.843552	-0.286888	0.465155	-0.513051	0.00145594	0.00374154	0.142547	0.356927	0.24697	0.363547	0.226413	0.360262	0.915912	0.000452591	0.00163821	-3.26541
WBGene00000256	bli-6	47.8177	44.2098	45.6411	41.2435	47.7325	46.3012	47.6764	37.8971	37.9151	49.1938	51.3823	55.4851	47.9199	45.31	44.6101	33.8667	38.0153	38.524	47.3953	48.5876	47.7601	40.8149	41.8802	33.1753	33.6363	39.0581	31.6135	bli-6	-0.0319968	-0.162971	0.180753	0.00124942	-0.314805	0.0612594	-0.246852	-0.404003	0.690809	0.754736	0.0517461	0.191641	0.0291973	0.0647632	0.444512	0.587507	-0.179504	0.0313612	0.0664693	-0.993088
WBGene00000257	bmk-1	133.754	132.543	131.008	123.41	119.725	123.217	134.606	132.581	131.873	121.214	119.388	120.309	114.952	114.742	118.094	119.457	119.068	116.657	120.208	124.25	121.76	122.347	124.596	119.214	121.186	122.629	120.686	bmk-1	-0.11692	0.00642399	-0.138679	-0.192527	-0.162292	-0.118241	-0.117221	-0.124337	0.000113387	0.000370776	0.805192	0.909987	1.28393e-05	8.10245e-05	9.98247e-05	0.000651261	-0.053848	0.0533539	0.104229	0.388294
WBGene00000259	bpl-1	48.7289	55.0467	50.219	52.9548	50.4768	50.7966	51.0272	54.2345	53.5129	57.6047	55.0681	57.5818	55.4001	57.9282	55.3682	54.7106	57.2085	54.7465	54.076	54.1103	54.4162	57.4418	55.243	61.7078	52.1752	50.9295	53.9824	bpl-1	0.00698785	0.0472322	0.148867	0.135743	0.118078	0.0823671	0.178814	0.0319125	0.873422	0.904731	0.281749	0.530478	0.00181091	0.0059689	0.0667953	0.141813	-0.0131249	0.762722	0.835881	-0.0881653
WBGene00000262	bra-1	6.26495	5.54253	5.47497	4.07396	3.81059	4.33344	5.40131	5.45026	6.06291	4.59927	5.11718	5.15805	4.70327	4.65647	5.00414	5.45499	5.54316	5.81416	4.81049	4.25307	4.99085	4.60762	5.18297	3.6722	6.33993	5.91981	5.85578	bra-1	-0.499404	-0.03648	-0.214466	-0.268279	-0.0368555	-0.295925	-0.3558	0.0662739	1.86634e-05	7.20281e-05	0.680749	0.839718	0.028999	0.0644105	0.0036529	0.0132553	-0.0538128	0.583256	0.691068	0.250915
WBGene00000263	F23H11.5	245.632	231.613	244.679	205.158	214.45	218.903	250.514	179.605	183.054	202.64	215.295	203.323	199.191	193.095	180.495	209.547	217.205	227.606	212.367	201.488	212.98	178.786	171.022	143.374	222.382	226.855	204.248	F23H11.5	-0.178422	-0.250904	-0.217278	-0.334045	-0.140847	-0.203358	-0.551368	-0.144742	0.0283074	0.0516456	0.00299161	0.0327793	0.00927235	0.0243326	0.0137245	0.0393582	-0.116767	0.15276	0.246262	0.537408
WBGene00000264	brc-1	32.4383	33.3925	34.0482	32.5594	30.3027	33.3571	34.3245	36.4635	34.7215	37.0118	34.6662	36.5785	33.4936	34.9011	34.5134	36.9409	36.1476	35.5817	33.7002	36.5907	35.5216	36.6446	37.2618	36.7711	37.6644	35.3894	36.8486	brc-1	-0.0536144	0.0798287	0.116881	0.0436936	0.120943	0.0808872	0.149021	0.13813	0.222001	0.300882	0.0675648	0.226919	0.010301	0.0266097	0.0661581	0.140719	-0.0731873	0.0973266	0.170942	-0.62617
WBGene00000265	brd-1	56.171	55.5312	56.5931	50.863	54.0488	51.7515	56.7905	55.6961	56.1282	56.5075	52.6562	56.63	54.9503	54.76	54.2219	55.1416	55.006	56.6464	58.0605	54.2884	55.15	57.3013	58.3332	61.1086	56.6964	56.2596	57.2085	brd-1	-0.104946	0.00259776	-0.0217984	-0.0378811	-0.0124581	-0.00592503	0.06827	0.0156561	0.00615468	0.0135645	0.94115	0.975432	0.543721	0.658402	0.867363	0.917834	-0.0160827	0.656633	0.753717	0.737791
WBGene00000266	bre-1	25.1043	25.1435	24.0867	32.1426	34.2801	33.1347	23.251	29.8752	29.4551	27.016	27.8044	26.9273	32.0014	33.4656	32.5765	29.1578	29.4057	28.5886	26.6561	24.2937	23.9538	30.0315	28.6583	31.4945	27.0544	26.0015	27.3218	bre-1	0.420104	0.140142	0.13677	0.400054	0.229197	0.0127654	0.275077	0.11248	1.91357e-07	1.09032e-06	0.0337357	0.146655	0.0411649	0.0861443	0.844168	0.90314	0.263285	0.000216129	0.000845766	1.92502
WBGene00000267	bre-2	2.94808	2.95636	3.03662	4.28691	4.29412	4.00637	3.08772	3.84531	3.59914	3.08322	2.43144	2.6574	3.63463	4.14112	3.80292	2.5543	2.63866	2.59059	3.12104	3.2457	2.87052	3.56913	4.79015	4.97205	2.77192	2.96761	3.97849	bre-2	0.495603	0.229358	-0.139125	0.373231	-0.200097	0.0443674	0.553006	0.0992308	0.000388639	0.00113993	0.0796639	0.251595	0.321872	0.445983	0.737905	0.829462	0.512356	0.000694931	0.00240607	-3.6827
WBGene00000268	bre-3	89.6104	92.9515	92.6957	98.9471	96.3481	98.3188	92.2562	101.888	100.206	105.48	105.116	100.544	103.748	102.545	105.116	98.5155	104.196	95.8123	102.002	104.834	100.093	95.8612	97.7768	109.611	98.657	98.9193	99.9338	bre-3	0.0939917	0.0955805	0.17635	0.178417	0.11656	0.157159	0.134523	0.1128	0.0305429	0.0551964	0.0274123	0.129271	0.000198887	0.000879346	0.000670421	0.00323782	0.00206765	0.96017	0.976371	0.0117247
WBGene00000269	bre-4	20.4619	20.763	20.3484	23.2576	23.514	23.5516	21.5699	18.8688	18.9	18.7751	18.4986	18.484	23.6324	20.7219	24.2701	20.8711	19.6296	19.3498	21.8815	21.7421	20.09	22.083	23.9929	21.3931	22.4568	21.2913	20.0332	bre-4	0.191645	-0.0541261	-0.143097	0.150885	-0.0448252	0.0493723	0.133821	0.0501458	0.00297936	0.00711043	0.377047	0.621019	0.0294049	0.0651055	0.418174	0.562462	0.293982	5.49361e-05	0.000247106	-2.05442
WBGene00000270	bre-5	18.7357	18.2575	16.9136	16.0566	17.4182	16.2629	17.6503	16.7863	17.0685	15.003	17.3502	17.0008	15.8199	16.2491	15.5522	17.8018	16.5507	16.2394	15.4732	16.126	16.8051	16.4557	16.2579	19.2457	17.2017	15.9134	17.1486	bre-5	-0.118639	-0.065391	-0.128779	-0.178169	-0.0968439	-0.157982	-0.0648833	-0.102041	0.0659384	0.106884	0.293123	0.542138	0.0502739	0.101975	0.0173495	0.0479792	-0.0493892	0.451399	0.571014	0.383518
WBGene00000271	brf-1	95.1349	97.2995	93.5147	96.7313	96.8453	91.5866	94.2668	95.2425	90.3465	87.7771	82.0308	87.8889	86.3954	85.9257	84.0133	86.9514	86.8951	85.2546	85.1679	86.7097	87.3343	88.948	86.8226	91.7809	85.864	88.0022	91.6252	brf-1	-0.00340267	-0.0303034	-0.149789	-0.157056	-0.142292	-0.141647	-0.0970837	-0.107335	0.920186	0.940938	0.374277	0.618464	0.000152253	0.000696203	0.000268429	0.00147994	-0.00726699	0.835995	0.890758	0.0485149
WBGene00000272	bro-1	0.170646	0.306282	0.346131	0.0778796	0.204483	0.0899412	0.378342	0.373631	0.231815	0.311275	0.174276	0.377175	0.204483	0.140385	0.341797	2.0085	1.69414	1.88287	0.26335	0.365129	0.18888	0.052684	0.269248	0.140385	0.289881	0.312325	0.347299	bro-1	-1.23993	0.319166	0.0894592	-0.301761	2.85489	0.00874673	-1.06474	0.283577	0.0287215	0.0523132	0.43003	0.666776	0.833238	0.888763	0.98352	0.99134	-0.39122	0.386243	0.507769	-4.37317
WBGene00000273	brp-1	354.332	361.996	347.24	585.054	591.402	597.72	358.813	362.657	353.431	305.575	308.124	314.008	496.05	476.605	479.72	293.811	311.992	315.324	360.448	341.501	357.551	437.731	437.731	420.356	357.224	350.698	338.233	brp-1	0.738189	0.015891	-0.19641	0.449663	-0.206114	-0.0047486	0.285909	-0.0236026	1.97033e-21	1.15215e-19	0.587507	0.780107	3.16454e-07	3.28503e-06	0.871613	0.920369	0.646073	1.97226e-19	1.31235e-17	-3.28941
WBGene00000274	btf-1	95.601	97.968	95.8612	100.033	95.2668	96.0477	91.8297	105.097	112.286	111.005	105.242	109.479	117.471	110.77	112.337	104.299	107.895	109.231	109.288	112.079	114.742	116.939	114.439	122.109	110.429	109.936	106.337	btf-1	0.0104653	0.0889126	0.17064	0.234779	0.152523	0.215285	0.286993	0.17512	0.822409	0.864628	0.0619311	0.214811	0.000891687	0.00321218	5.82757e-05	0.000414785	0.0641385	0.169867	0.267388	0.37587
WBGene00000275	bub-1	212.003	221.978	209.298	217.925	222.647	214.23	212.768	212.768	212.768	222.382	216.289	219.803	226.049	223.838	230.83	218.16	219.803	207.456	225.05	224.31	221.302	237.488	236.584	242.023	216.289	212.585	216.857	bub-1	0.0263493	-0.0102644	0.0345258	0.0821657	0.00440655	0.0611361	0.155137	0.0063118	0.337631	0.425426	0.706379	0.854878	0.213644	0.324786	0.0312994	0.077765	0.0476399	0.0899987	0.160506	1.37984
WBGene00000276	byn-1	105.267	107.169	108.344	96.0477	96.3481	99.6539	107.541	103.388	102.002	102.358	101.715	104.586	96.8209	93.5542	90.806	97.1923	102.973	100.274	102.701	102.076	100.011	89.7254	89.1299	90.0382	98.8418	96.6427	101.858	byn-1	-0.135644	-0.0353165	-0.0549372	-0.189725	-0.0935587	-0.0733349	-0.254336	-0.109704	0.00016016	0.00050785	0.261406	0.507926	0.0889971	0.162406	0.0253588	0.065449	-0.134788	0.000210688	0.000826523	2.45349
WBGene00000277	cab-1	80.4792	83.2354	82.7105	85.5815	90.4984	88.3126	86.3253	78.4825	78.6602	77.2001	76.4646	76.9387	79.9336	78.875	81.659	88.1982	88.7948	88.4053	74.6536	72.3034	75.4652	75.0666	75.8549	71.4825	76.0581	78.9895	74.6683	cab-1	0.100851	-0.0174957	-0.0950619	-0.035245	0.107714	-0.146882	-0.146138	-0.100788	0.00738805	0.0159587	0.621919	0.805735	0.0127674	0.0320191	0.000303068	0.00163764	0.0598169	0.10785	0.185865	-0.629242
WBGene00000279	cah-1	3.62781	3.47774	4.05947	3.79151	3.42486	3.47774	3.72006	4.04917	4.24684	3.94453	4.21179	4.09664	5.21029	4.59756	4.31472	4.21355	3.7532	4.24504	3.85381	3.93772	4.04827	4.05483	4.35207	5.71536	4.39285	4.1134	4.34588	cah-1	-0.0580843	0.102831	0.135342	0.33993	0.127692	0.0847137	0.308488	0.204273	0.592057	0.670203	0.32743	0.574044	0.208445	0.318527	0.42521	0.568704	0.204588	0.054362	0.105853	1.51163
WBGene00000280	cah-2	1.28464	1.25609	0.784105	1.62518	1.52738	1.4085	1.26641	1.70849	1.67381	1.55997	1.38446	1.37319	1.53086	1.62772	1.37969	1.1191	1.56669	1.24103	1.15771	1.14768	1.52607	1.94926	1.73097	1.74723	1.66905	1.21233	1.18521	cah-2	0.4922	0.498659	0.405485	0.482962	0.269344	0.223174	0.740394	0.306007	0.0137319	0.027478	0.0120001	0.0769879	0.0429617	0.089259	0.260578	0.399881	0.0774768	0.668675	0.763152	0.191072
WBGene00000281	cah-3	57.5234	58.3899	61.4338	38.3286	36.6333	40.7894	62.3113	48.5368	46.7532	61.9014	62.9922	65.7113	28.2514	27.8612	29.36	55.4638	54.1103	55.667	60.5887	59.1168	61.4815	31.8804	33.3871	29.3406	60.5077	59.9449	55.8802	cah-3	-0.615603	-0.178128	0.105486	-1.0521	-0.101126	0.032056	-0.901777	-0.0079491	5.6882e-10	4.91478e-09	0.00876735	0.0633108	0.10221	0.181799	0.6117	0.730783	-1.15759	7.78692e-16	2.54681e-14	-10.9739
WBGene00000282	cah-4	96.5201	93.5747	97.7999	72.1104	78.497	75.8068	98.8925	102.952	99.6361	136.733	146.36	138.719	92.4546	96.5067	94.6639	149.865	156.63	161.265	97.2765	106.337	98.7914	69.706	72.4833	63.2156	112.257	123.919	116.62	cah-4	-0.348979	0.0663155	0.549954	-0.0218181	0.700825	0.0682621	-0.485659	0.292118	2.91946e-08	1.91185e-07	0.147057	0.363758	3.96384e-13	1.4975e-11	0.137848	0.248702	-0.571772	1.86026e-13	3.99841e-12	-1.03967
WBGene00000283	cah-5	39.9268	39.7787	37.966	11.439	11.1323	11.6621	39.9232	37.1159	37.4931	17.6848	20.9228	20.0574	8.046	9.1702	9.30044	18.6782	19.6819	19.511	28.5032	30.2787	26.7694	10.6993	11.0472	10.8871	35.645	34.7762	35.0473	cah-5	-1.78034	-0.0388155	-1.00579	-2.15285	-1.02133	-0.462369	-1.84916	-0.157707	5.16693e-22	3.37346e-20	0.405157	0.646904	2.96591e-17	2.41826e-15	3.06042e-10	1.27765e-08	-1.14706	8.07017e-16	2.62954e-14	1.14046
WBGene00000284	cah-6	2.65478	3.31485	2.8929	2.60703	2.44944	2.8391	3.0259	3.10907	2.63866	2.32367	2.63932	2.49654	2.87052	2.50403	2.32367	2.51129	2.08243	2.35009	2.65996	2.05656	2.91936	2.75568	2.13118	2.45068	2.43198	2.67443	2.17676	cah-6	-0.156928	-0.000445695	-0.236775	-0.192241	-0.348582	-0.208363	-0.268159	-0.272746	0.22341	0.302531	0.99709	0.999045	0.0808987	0.150248	0.114705	0.215641	0.0445333	0.743951	0.821896	-0.188083
WBGene00000285	cal-1	2.48579	3.31485	2.70293	3.93252	3.62844	4.59165	2.59059	3.79255	3.85831	3.29092	2.61055	3.32169	4.96778	4.31596	4.1931	4.92107	4.97142	5.58882	3.27504	3.0902	3.39665	3.90772	4.21585	4.05264	4.05947	3.97304	3.4384	cal-1	0.525617	0.257417	0.132382	0.681732	0.887455	0.219215	0.536994	0.449015	0.000587143	0.00165052	0.0745559	0.241344	0.369788	0.495495	0.132255	0.240636	0.549351	0.000400491	0.00147016	4.14975
WBGene00000286	cal-2	4.45024	3.67364	3.17755	4.25461	3.96355	4.39329	3.87426	3.56787	3.74611	4.56055	3.95496	3.91312	3.83687	4.34588	3.9396	4.35207	4.3779	5.08798	4.04917	3.79568	3.04727	3.94154	4.21585	3.1466	4.12746	3.77049	4.40604	cal-2	0.16581	-0.00651425	0.139561	0.10886	0.300911	-0.0485948	0.0148423	0.125601	0.173005	0.244274	0.957321	0.982159	0.257137	0.374913	0.696338	0.798492	-0.0307007	0.800184	0.864443	-0.21998
WBGene00000287	cal-3	1.92682	1.74784	1.60359	2.40223	2.44944	2.65478	1.90174	1.32981	1.67381	1.92682	1.42184	1.74784	2.33668	2.06656	2.38801	2.43198	1.84326	1.30085	1.90069	1.64162	2.02341	2.65065	2.48962	2.33494	2.02119	1.52847	1.99152	cal-3	0.507773	-0.123455	-0.0617665	0.360976	-0.00345844	0.0763296	0.50751	0.0569587	0.00372446	0.00870094	0.486422	0.710266	0.731651	0.812508	0.659111	0.769634	0.422743	0.0212894	0.0477875	-6.84421
WBGene00000288	cal-4	1.77533	2.48025	1.74784	2.35583	2.809	2.55786	2.21228	2.40507	2.06421	2.32367	3.11199	2.99051	3.16076	2.69708	2.51624	2.65996	2.60803	2.31999	2.638	2.17305	1.88287	2.72122	2.46007	2.68369	2.23362	2.11827	2.86149	cal-4	0.383805	0.185412	0.512148	0.507666	0.358568	0.184096	0.41592	0.279289	0.0175003	0.0339282	0.242057	0.48515	0.00213234	0.00688207	0.251303	0.389461	-0.00448223	0.974914	0.985411	-0.00875183
WBGene00000289	cam-1	81.7936	83.8772	78.0842	82.3893	84.5483	80.7936	79.9842	99.3361	98.9193	95.0557	93.8435	98.1592	108.219	111.656	111.179	97.3613	97.8239	96.577	92.0498	94.0373	90.0173	106.447	104.68	108.473	97.9329	92.3369	96.0477	cam-1	0.0239961	0.183141	0.237262	0.442541	0.260217	0.180289	0.390976	0.232632	0.643535	0.714371	0.00111766	0.0190298	6.72113e-05	0.000340408	0.00136425	0.00584579	0.205279	0.00029179	0.00110911	0.8652
WBGene00000292	cap-1	111.098	112.565	113.527	141.163	145.215	139.23	114.742	103.28	104.834	100.348	105.67	101.586	121.115	116.293	123.066	105.039	108.241	110.936	102.297	98.8418	97.5923	123.498	116.767	115.012	104.708	106.511	105.157	cap-1	0.33579	-0.063458	-0.132723	0.0956316	-0.0554166	-0.173983	0.0759405	-0.0916691	3.14708e-10	2.83335e-09	0.0916239	0.272986	0.0012158	0.00421789	5.7587e-05	0.000410773	0.228355	1.05114e-06	6.72381e-06	-1.72053
WBGene00000293	cap-2	123.109	123.69	119.955	146.081	150.779	150.061	126.913	121.978	122.347	115.822	122.347	117.471	135.651	136.875	137.693	132.044	133.056	135.774	116.795	115.389	113.763	127.638	133.814	139.049	126.559	126.913	127.831	cap-2	0.284766	0.0177057	-0.0448035	0.161662	0.128983	-0.0839131	0.124953	0.0562811	2.21309e-10	2.04331e-09	0.560643	0.760991	0.152748	0.249157	0.0100625	0.0305462	0.206466	2.07818e-07	1.50822e-06	-4.60826
WBGene00000294	cas-1	113.168	115.389	117.757	138.443	142.42	146.41	117.623	113.074	114.047	100.997	102.952	103.638	130.038	126.769	127.905	110.913	111.656	112.229	105.642	107.357	107.974	125.999	129.063	121.214	115.012	119.553	113.353	cas-1	0.302331	-0.00619622	-0.170476	0.152002	-0.048116	-0.109584	0.120838	0.00693103	5.3404e-11	5.41113e-10	0.837944	0.926039	5.90967e-06	4.17718e-05	0.00118118	0.00517364	0.322478	2.62912e-11	3.84666e-10	-1.89163
WBGene00000295	cat-1	1.89124	1.49143	1.43741	1.41462	1.15628	1.18946	1.60137	1.74784	1.27082	1.29495	1.18521	1.92449	1.43741	1.91853	1.76998	2.39615	1.87563	2.06303	1.19059	1.37257	1.31301	1.77533	1.49815	1.3772	1.5475	1.37149	1.81644	cat-1	-0.346471	-0.0599142	-0.139236	0.0815123	0.377621	-0.316078	-0.0435417	-0.0346586	0.0723443	0.115904	0.730002	0.866726	0.447413	0.571508	0.0968744	0.189461	0.220748	0.231642	0.342057	-1.58543
WBGene00000296	cat-2	0.84371	0.481012	0.690435	1.01645	0.943338	1.04747	0.646365	0.907391	0.59979	0.44407	0.735531	1.05985	0.922903	1.12379	1.0994	0.893399	0.539393	1.01361	0.63562	0.479036	0.812844	1.19002	1.00664	0.953094	0.724271	1.30085	0.520555	cat-2	0.585645	0.0983887	0.111726	0.642054	0.24626	-0.0643314	0.657293	0.255647	0.0584737	0.0963028	0.756883	0.881904	0.732669	0.813416	0.846575	0.904597	0.530328	0.0925613	0.164267	4.74668
WBGene00000298	cat-4	36.7597	39.633	39.7927	31.9808	32.1731	31.6246	39.3993	46.461	47.5388	16.2282	18.3018	17.403	16.5849	15.9557	15.1815	13.1388	13.6547	12.9299	35.1086	35.7814	36.2246	33.5254	33.1443	31.7062	43.0104	40.0824	43.8696	cat-4	-0.276415	0.194582	-1.16141	-1.28156	-1.5475	-0.115813	-0.236443	0.128688	2.61677e-05	9.84094e-05	0.000824516	0.0160172	7.75185e-17	5.85332e-15	0.0411072	0.0971833	-0.120146	0.104485	0.18126	0.103448
WBGene00000301	cav-1	72.1994	60.5554	68.5977	35.7255	35.9566	37.223	72.6848	68.9014	70.1448	52.4777	51.7066	52.3615	59.4221	57.158	57.0902	66.4277	57.072	65.3017	56.9481	53.0991	55.9715	58.6336	60.0014	52.3164	61.987	61.3314	60.1453	cav-1	-0.885269	0.073567	-0.36123	-0.211902	-0.0962006	-0.275818	-0.232725	-0.132849	5.3591e-15	1.03984e-13	0.172288	0.39943	4.64286e-07	4.56842e-06	2.36681e-05	0.000193889	0.149329	0.0134728	0.0322511	-0.413389
WBGene00000302	cav-2	2.53442	2.70165	2.638	1.15263	1.12824	1.59382	2.55492	2.25894	2.2468	3.8272	3.48556	3.91312	2.49654	1.30143	1.82806	4.35207	3.71284	3.8929	3.73262	3.57428	3.39665	1.43741	1.27358	1.3772	3.22382	3.41441	3.86444	cav-2	-1.05366	-0.156109	0.515784	-0.540287	0.596381	0.447844	-0.953422	0.413991	3.08702e-06	1.39289e-05	0.279122	0.52745	0.000468842	0.00183511	0.0018432	0.00747045	-1.05607	1.35774e-07	1.02566e-06	-2.04751
WBGene00000366	cbp-1	240.277	242.297	228.513	191.272	199.801	191.935	224.823	283.142	292.648	273.713	276.615	283.91	251.103	251.103	247.715	290.225	283.91	286.574	271.325	273.248	275.758	240.905	252.127	239.799	288.232	278.441	278.153	cbp-1	-0.286659	0.160267	0.23124	0.0774027	0.275724	0.206596	0.0441919	0.249054	1.24099e-05	4.96254e-05	0.00501842	0.0448097	0.000151528	0.000693252	0.000519372	0.00260166	-0.153837	0.00701637	0.0184906	-0.665271
WBGene00000367	cca-1	17.3895	16.5485	16.1125	11.1711	13.2908	12.4157	15.0829	17.8674	18.3768	20.3551	20.9963	19.2749	15.4138	15.3311	15.3336	21.2326	19.4561	19.511	17.5275	17.6336	17.7628	14.6719	15.5891	16.4037	16.8584	16.1821	18.4957	cca-1	-0.452611	0.0273751	0.273486	-0.120438	0.261114	0.0795576	-0.108311	0.0384625	8.71381e-07	4.39665e-06	0.683936	0.841331	0.000271713	0.00115291	0.243401	0.380618	-0.393924	2.81491e-06	1.66055e-05	-1.44038
WBGene00000368	ccb-1	13.2601	13.9007	12.6559	15.3884	15.1434	17.1885	12.5563	16.2905	14.0949	15.5441	17.6197	17.7011	21.0915	20.4941	21.8054	16.126	17.0457	17.2304	15.9425	15.5141	16.7034	19.0066	19.3064	17.6313	16.001	16.1125	15.6101	ccb-1	0.259065	0.103152	0.354808	0.670857	0.34463	0.2763	0.495166	0.263403	0.00118918	0.00311172	0.166858	0.392075	3.20487e-05	0.000179429	0.000628369	0.00306369	0.316049	6.39083e-05	0.000282776	0.890762
WBGene00000369	ccf-1	76.0205	77.6624	82.3157	80.7172	85.0996	87.0896	78.5829	73.4913	69.8464	74.5396	66.2082	75.5531	83.4037	78.7882	78.9895	73.2873	75.0165	78.0452	70.1448	69.6951	67.2117	81.6953	80.6244	71.598	77.1402	76.4139	68.8329	ccf-1	0.0987984	-0.0877902	-0.125478	0.0321775	-0.0577065	-0.187292	-0.0102	-0.0858514	0.0710787	0.114224	0.109924	0.305203	0.0277743	0.0621834	0.00170146	0.00701551	0.157656	0.00704217	0.0185446	-1.25644
WBGene00000370	ccg-1	65.8508	64.5513	65.5657	129.307	126.81	131.086	65.7706	68.7924	70.8373	62.7866	68.8784	62.3697	98.1357	97.2765	97.968	64.1791	66.2752	69.6381	70.9348	66.7892	67.281	90.3465	93.0173	87.5373	72.7968	69.5139	72.3814	ccg-1	0.981811	0.0660205	-0.0169236	0.581637	0.0313802	0.0656976	0.467713	0.130833	1.84706e-21	1.08739e-19	0.102214	0.291888	0.674594	0.766833	0.105989	0.202989	0.598561	2.62294e-15	7.82691e-14	-35.3684
WBGene00000371	cco-1	256.406	265.947	269.783	206.592	206.592	210.716	277.706	163.611	171.441	148.179	145.914	147.721	92.8624	112.107	103.51	156.759	157.965	156.502	193.802	182.97	178.655	143.374	145.687	131.486	186.994	192.747	186.34	cco-1	-0.343713	-0.409944	-0.840986	-1.36303	-0.748129	-0.510913	-0.911402	-0.483809	0.00157454	0.00401365	0.000262519	0.00947407	5.73013e-09	9.55039e-08	1.8603e-05	0.000159702	-0.52204	5.65516e-05	0.000253192	0.620747
WBGene00000372	cyp-13A7	0.404605	0.165854	0.346131	0.490807	0.423735	0.27634	0.284702	0.273059	0.374786	11.5661	10.5147	10.5353	0.376178	0.287354	0.192078	0.169382	0.196961	0.299501	2.06007	1.92293	1.98548	0.309995	0.374786	0.0562908	0.222487	0.115381	0.176446	cyp-13A7	0.418229	0.0735287	5.13165	-0.0618784	-0.384528	2.71125	-0.517009	-0.78586	0.309393	0.395702	0.86176	0.936797	2.59312e-12	8.49712e-11	2.02336e-07	3.87427e-06	-5.19352	5.59714e-12	9.21379e-11	-1.01206
WBGene00000373	cyp-14A5	11.9737	12.0312	11.1655	248.841	260.755	249.045	12.6164	13.576	14.3356	9.33197	9.02439	8.29935	120.592	119.641	119.823	12.6956	12.9757	13.3373	10.7574	11.0849	10.1658	146.263	143.436	150.241	13.3547	12.0539	13.3684	cyp-14A5	4.43451	0.201289	-0.405093	3.35968	0.152294	-0.136856	3.6477	0.139407	1.91213e-34	1.8731e-30	0.00253757	0.0295397	2.19874e-06	1.77833e-05	0.0422952	0.0993294	3.76477	2.69329e-30	3.59803e-27	-9.2936
WBGene00000374	cyp-31A1	8.18251	7.29044	8.67822	8.46592	9.36297	8.79078	9.39846	8.87006	9.46562	16.0498	16.2164	14.9536	13.6434	12.934	13.4656	9.84098	11.1584	11.515	12.8527	12.7249	13.5122	11.1097	12.3968	11.8376	11.3292	10.457	10.3341	cyp-31A1	0.136956	0.198528	0.964137	0.728581	0.433981	0.694247	0.548279	0.410567	0.0756727	0.120558	0.0111443	0.0738153	3.39877e-14	1.52918e-12	1.07752e-10	4.88596e-09	-0.235556	0.000693841	0.00240278	-0.244318
WBGene00000375	cyp-44A1	37.9061	39.7046	37.7833	38.029	42.6515	38.5689	40.0506	38.3696	39.9303	40.6717	41.0945	41.9402	42.9102	43.7598	44.1208	40.2235	36.3603	38.6085	39.5135	42.6515	41.2306	43.6826	46.3012	44.095	39.6916	38.4855	42.6094	cyp-44A1	0.0447737	0.0370603	0.101912	0.1817	-0.00493104	0.0951737	0.217901	0.0651707	0.343142	0.431319	0.428956	0.665957	0.0371767	0.0789686	0.0489594	0.111512	0.079788	0.0951221	0.167682	0.782913
WBGene00000376	ccr-4	302.279	294.48	291.982	327.597	323.363	323.363	294.824	340.051	343.088	368.997	365.76	363.617	431.201	439.073	430.349	355.766	360.448	380.773	344.161	330.676	353.009	415.568	419.113	416.32	351.99	342.558	343.718	ccr-4	0.132715	0.133531	0.30526	0.549289	0.304157	0.209573	0.493169	0.224091	0.00149707	0.00383418	0.00136964	0.0210501	7.07086e-09	1.15089e-07	5.64707e-06	6.01213e-05	0.244029	3.07604e-07	2.16194e-06	0.799412
WBGene00000377	cct-1	394.93	400.109	399.307	357.224	353.431	345.561	400.109	373.971	365.052	356.581	342.033	353.009	315.799	320.184	326.114	395.524	402.158	397.355	357.878	355.766	340.731	325.582	312.467	321.249	373.028	374.492	381.831	cct-1	-0.176901	-0.0685419	-0.183512	-0.312121	0.00112314	-0.179761	-0.316343	-0.0807117	1.02024e-06	5.08131e-06	0.0218434	0.113294	6.03273e-07	5.73142e-06	7.91784e-07	1.19159e-05	-0.128609	0.000141397	0.000578206	0.700818
WBGene00000378	cct-2	413.706	411.667	413.706	385.738	377.082	379.656	418.403	406.618	396.585	407.677	389.435	393.027	344.919	338.233	330.676	445.412	451.195	445.412	371.805	383.521	378.882	353.431	346.673	339.385	420.356	427.025	422.347	cct-2	-0.116878	-0.0204241	-0.0586195	-0.289395	0.115129	-0.128165	-0.253005	0.035213	5.45929e-05	0.000190806	0.409865	0.650598	0.0245332	0.0560617	1.58204e-05	0.000139965	-0.230775	5.69061e-10	6.5667e-09	3.93683
WBGene00000379	cct-4	423.67	422.347	410.499	399.307	394.93	380.773	417.746	456.834	453.846	424.745	425.917	422.347	395.524	393.784	406.618	485.15	482.87	462.106	400.983	418.075	402.158	395.524	395.227	405.692	423.67	437.731	453.846	cct-4	-0.0964953	0.0787719	0.0187918	-0.0716628	0.185666	-0.0418278	-0.0712505	0.065327	0.00473064	0.0107452	0.0169857	0.0966461	0.554482	0.668039	0.193333	0.320047	-0.0904546	0.00793603	0.0205249	-4.81351
WBGene00000380	cct-5	655.312	655.312	639.747	622.893	594.535	595.635	647.346	731.118	722.387	708.318	695.307	711.133	634.696	639.747	639.747	837.097	828.918	832.761	688.868	686.633	663.729	639.747	626.84	695.307	754.126	757.455	771.061	cct-5	-0.104874	0.104629	0.11691	-0.0269652	0.357459	0.0643081	0.00535039	0.226951	0.00531189	0.0118881	0.00483986	0.0437097	0.00206918	0.00670688	0.0721919	0.150855	-0.143875	0.000275685	0.00105227	-1.23065
WBGene00000381	cct-6	394.361	396.585	392.199	367.859	365.052	353.009	404.837	400.983	408.734	418.403	415.568	413.706	372.334	375.284	375.284	467.69	459.012	455.294	393.784	402.158	392.199	364.529	371.232	366.668	439.073	429.678	436.453	cct-6	-0.12347	0.0376707	0.0765667	-0.0753635	0.223582	0.00580596	-0.101859	0.141614	4.79839e-06	2.08386e-05	0.0927602	0.274813	0.00150304	0.00507946	0.791739	0.86779	-0.15193	1.52901e-07	1.13967e-06	-1.98429
WBGene00000382	cdc-6	91.7409	92.6957	94.5402	88.3126	84.0558	84.5081	90.8969	87.3343	83.9695	86.3556	80.9716	83.0534	83.175	84.4445	82.9251	85.0651	86.4104	83.2819	85.3756	86.1216	82.9814	84.1058	85.1126	86.4254	85.5362	83.0671	85.1467	cdc-6	-0.118152	-0.0890875	-0.156399	-0.154688	-0.131302	-0.132559	-0.126387	-0.136727	0.00101246	0.0026956	0.00948089	0.0666618	4.6699e-05	0.000248856	0.000313839	0.00168797	0.00171061	0.959085	0.975944	-0.0109375
WBGene00000383	cdc-14	180.186	174.761	176.229	187.757	185.165	189.331	173.798	176.162	172.623	177.406	164.264	170.019	190.4	186.259	186.34	171.35	174.005	167.428	170.448	167.991	172.623	183.574	190.827	188.313	172.514	164.321	168.4	cdc-14	0.0818034	-0.0236271	-0.0549119	0.0837292	-0.0515555	-0.055831	0.0827491	-0.0728122	0.00722143	0.0156533	0.411101	0.65166	0.0652626	0.125991	0.0600666	0.130495	0.138641	4.16211e-05	0.000192448	-2.52479
WBGene00000386	cdc-25.1	186.34	189.331	189.128	183.984	187.142	175.108	191.527	214.54	213.451	217.565	217.693	225.967	228.513	225.771	215.211	216.289	216.035	211.606	218.37	215.833	212.195	227.343	228.188	228.188	217.925	222.848	220.371	cdc-25.1	-0.0482672	0.131028	0.227861	0.245573	0.188916	0.195033	0.275842	0.227407	0.172929	0.244207	0.000622144	0.0141795	2.91095e-07	3.05033e-06	3.72217e-06	4.23333e-05	0.0177127	0.60488	0.709363	0.0777346
WBGene00000387	cdc-25.2	50.4105	51.1437	51.2767	39.5777	37.6293	38.524	48.7878	50.1872	47.204	41.3521	44.1741	46.4008	48.0261	46.5757	48.2532	47.8273	47.8998	49.4574	42.5913	44.7214	45.2082	47.4108	46.3742	45.4083	50.2502	47.3232	47.013	cdc-25.2	-0.399677	-0.0634059	-0.211362	-0.0976183	-0.0728102	-0.20712	-0.133393	-0.0802672	1.29799e-10	1.23316e-09	0.114218	0.312688	1.32655e-05	8.34115e-05	1.55029e-05	0.00013794	0.113744	0.00924805	0.0233956	-0.538146
WBGene00000388	cdc-25.3	30.3107	30.7355	29.5974	26.2755	23.9692	22.7855	27.3756	25.5377	24.0714	20.2983	20.8622	20.9337	20.953	22.4312	22.1717	21.8294	22.9806	22.0377	21.0229	19.4116	18.7822	22.6822	21.7862	23.0809	22.5238	22.5736	22.4895	cdc-25.3	-0.308824	-0.234384	-0.543546	-0.466893	-0.437338	-0.610922	-0.424469	-0.422218	1.22102e-06	5.98178e-06	5.37384e-05	0.00462868	4.96913e-11	1.2823e-09	3.32134e-12	2.16849e-10	0.0766523	0.176509	0.275965	-0.141023
WBGene00000389	cdc-25.4	1.70849	1.64162	1.40786	1.90921	2.44944	1.4085	2.10713	1.74784	1.42184	1.55997	1.24967	1.34248	1.71553	1.2246	1.9425	1.37082	1.43259	1.18797	1.28401	1.25552	1.35115	1.60137	1.66745	2.05656	0.902609	0.917178	1.4995	cdc-25.4	0.24764	0.145353	-0.203582	0.00318276	-0.264015	-0.289896	0.143029	-0.567437	0.198709	0.27417	0.44962	0.682804	0.337233	0.462032	0.176568	0.299092	0.206765	0.333183	0.452503	-1.01563
WBGene00000390	cdc-42	160.585	161.359	165.062	200.556	196.297	201.005	163.874	188.247	187.922	194.22	192.596	191.272	208.749	212.585	218.16	208.979	217.693	209.637	176.897	176.777	181.327	216.289	213.832	220.371	187.595	198.473	197.446	cdc-42	0.296101	0.145458	0.247325	0.392631	0.385966	0.135574	0.417142	0.260564	9.28218e-09	6.6013e-08	0.000515006	0.0128692	3.12564e-07	3.24659e-06	0.00109603	0.00486574	0.145306	0.000449834	0.00163027	0.587511
WBGene00000391	cdd-1	6.23139	5.95862	6.44058	6.67441	7.15645	7.05273	6.82962	5.12302	5.11617	3.12004	3.77174	3.91312	2.97331	2.8116	2.99919	6.45228	6.46472	5.92956	4.44593	5.8129	3.64684	4.17873	4.58555	3.48944	6.84054	7.93618	7.55893	cdd-1	0.16084	-0.135588	-0.786799	-1.08518	0.01139	-0.455555	-0.600069	0.25859	0.151741	0.218569	0.241606	0.484692	3.01999e-06	2.33103e-05	0.000856776	0.00397426	-0.298378	0.0596103	0.114279	0.37923
WBGene00000392	cdd-2	28.8648	27.2888	29.2996	21.0063	22.6067	22.6906	29.7676	24.7061	26.2883	30.1566	29.4693	29.0587	25.2256	24.8006	21.8537	30.7099	29.3759	29.3759	29.1101	29.9828	31.0177	21.6674	23.2534	20.2108	31.0469	31.7839	29.1393	cdd-2	-0.369853	-0.0853756	0.0522958	-0.249984	0.0634202	0.0744409	-0.389586	0.105165	1.91067e-06	9.01211e-06	0.159197	0.381189	0.383983	0.509523	0.213141	0.344209	-0.30228	3.32754e-05	0.000157122	-5.7802
WBGene00000393	cdf-1	29.8871	28.146	31.006	30.5507	31.608	30.8556	29.7144	32.2201	33.2562	25.5907	24.3395	24.746	30.5453	29.5093	29.0123	25.7328	24.2701	24.1722	28.4127	25.2743	27.1301	31.3792	31.6643	32.4048	27.5865	26.1442	28.7611	cdf-1	0.0620044	0.0929801	-0.254678	0.000503223	-0.267206	-0.138264	0.0988507	-0.112179	0.211395	0.288828	0.0627175	0.21674	2.88127e-05	0.000163219	0.00966881	0.0295579	0.255182	3.05517e-05	0.000145407	-1.00198
WBGene00000395	cdh-3	13.7615	14.0287	12.0539	6.05891	5.72449	5.66467	12.9594	14.9835	17.5793	13.3497	15.4905	14.1146	10.4606	10.3922	10.4279	15.7706	16.0955	16.6314	12.8118	10.7855	12.681	8.81739	9.41907	10.2029	14.3927	11.843	13.7893	cdh-3	-1.18675	0.178682	0.108901	-0.345752	0.289293	-0.130829	-0.491318	0.0039773	2.68194e-11	2.84008e-10	0.0451106	0.175344	0.224627	0.337845	0.15687	0.274163	-0.454652	3.7001e-05	0.000173067	-4.17493
WBGene00000396	cdh-4	87.005	84.8923	76.2654	70.4285	67.1709	68.8163	74.5396	94.2178	105.901	98.2865	92.7973	95.5647	102.142	107.169	105.957	104.03	105.097	105.565	91.0848	93.9528	94.4843	101.888	99.9493	110.77	99.5692	96.481	101.324	cdh-4	-0.263424	0.12989	0.209621	0.347159	0.345147	0.172899	0.331257	0.262673	0.00100842	0.00268731	0.0709637	0.233901	0.00541187	0.0154382	0.0188614	0.0514394	0.137538	0.0540684	0.105388	0.65613
WBGene00000397	cdh-5	15.2664	15.2965	14.6719	16.76	15.9948	15.9067	14.1716	17.7977	18.2756	16.944	19.3498	19.3726	20.7219	20.7829	20.6518	19.5207	19.7643	18.9569	20.0595	18.6413	19.3352	20.6575	20.3041	20.9407	22.4861	19.2836	18.6485	cdh-5	0.107169	0.138989	0.298879	0.45884	0.363706	0.361492	0.451771	0.413236	0.166704	0.236474	0.0727902	0.237488	0.000404329	0.00161871	3.34195e-05	0.000259918	0.159961	0.0333305	0.070011	0.535202
WBGene00000399	cdh-7	2.75897	2.52472	2.2583	4.05378	4.27087	4.59165	2.55492	2.89216	2.92311	4.10344	3.77174	4.43837	4.28643	4.31596	4.90654	2.92001	3.91212	3.31215	3.76066	4.01807	3.73262	3.13111	3.01479	3.80292	2.85265	2.99919	2.76428	cdh-7	0.773518	0.147496	0.711422	0.83814	0.429676	0.610039	0.382392	0.194714	1.88283e-07	1.07457e-06	0.229965	0.47242	9.99862e-07	8.94161e-06	1.13819e-05	0.000106331	0.126718	0.219028	0.327524	0.178119
WBGene00000401	cdh-9	2.10436	2.43714	2.29281	1.1086	1.22091	1.4085	2.21228	3.10907	2.3629	2.36751	2.46348	2.46934	1.8208	1.62772	1.73917	2.65996	2.60803	2.68431	2.09175	1.96439	1.74662	1.50609	2.19809	1.57111	2.5805	1.97511	2.45463	cdh-9	-0.87887	0.163272	0.102972	-0.392889	0.225803	-0.228415	-0.377716	0.0319007	1.57004e-05	6.14951e-05	0.222374	0.463455	0.453538	0.577059	0.12093	0.224523	-0.495861	0.00226494	0.00685878	-4.8155
WBGene00000402	cdh-10	5.87316	6.30211	5.61149	7.98339	9.70115	8.37035	6.05369	6.59539	5.8954	6.70352	7.58957	8.39913	8.99935	9.06874	9.78522	6.107	6.18526	6.46006	7.3151	6.86793	8.39913	6.21822	7.24137	6.71918	5.15999	5.95622	5.51118	cdh-10	0.544182	0.0641597	0.354294	0.647401	0.0822142	0.343603	0.183384	-0.0952424	1.5233e-06	7.3344e-06	0.502918	0.721177	0.000675515	0.00252307	0.000843827	0.00393032	0.293107	0.00211925	0.0064695	0.827298
WBGene00000403	casy-1	49.2305	50.005	47.8881	48.0261	47.7948	47.0966	45.8955	45.2442	47.4973	50.8428	49.8401	53.4085	48.0261	48.2286	48.94	50.343	52.3227	50.4219	46.2142	49.6263	48.5785	42.9212	42.8033	46.2847	46.5608	46.5424	45.1242	casy-1	-0.0411333	-0.0863861	0.0678188	-0.0188968	0.057905	-0.0288229	-0.159907	-0.08949	0.277749	0.362328	0.0272521	0.128926	0.0780424	0.145816	0.444443	0.587464	-0.0867156	0.0278739	0.060023	-1.27864
WBGene00000405	cdk-1	170.543	164.017	171.231	169.746	163.401	166.314	167.353	156.234	158.101	163.086	159.295	160.585	170.661	168.652	166.916	161.913	165.801	168.248	162.597	163.94	161.856	170.208	164.953	160.543	167.942	168.248	170.019	cdk-1	-0.0179573	-0.0709128	-0.0668108	0.00120426	-0.0277864	-0.0507069	-0.0286621	0.000981031	0.538882	0.622465	0.0203453	0.108517	0.0293412	0.0650094	0.0906493	0.179718	0.068015	0.0273502	0.0590858	-1.01802
WBGene00000406	cdk-4	7.59652	7.56017	8.04904	5.11824	4.84867	5.12077	7.5481	8.32832	7.26174	8.31756	7.03649	6.52741	6.49496	6.27343	6.97785	7.07857	7.99425	8.4467	7.82503	6.26269	7.3545	6.27343	6.37974	7.52564	7.6516	7.93618	7.31807	cdk-4	-0.618756	-0.00363845	-0.0966636	-0.235893	0.0251605	-0.111594	-0.213885	-0.0182745	8.0694e-07	4.1001e-06	0.96673	0.986155	0.290997	0.412652	0.220673	0.353122	-0.139229	0.146904	0.238839	1.44035
WBGene00000407	cdk-5	40.3013	41.3239	43.0258	37.8839	39.3724	40.8865	41.8261	40.5276	41.5821	42.2886	40.2602	42.122	41.2713	38.842	39.3247	44.1208	44.1913	43.8423	41.1413	40.1255	37.1887	40.5825	38.6266	38.5749	41.9704	41.9471	41.5458	cdk-5	-0.0788861	-0.00767152	0.00126855	-0.0610815	0.0850903	-0.0727634	-0.0803474	0.0103631	0.0611504	0.100094	0.848835	0.931317	0.97523	0.984412	0.08307	0.167909	-0.0623501	0.139486	0.22916	-49.1506
WBGene00000408	cdk-7	62.9922	59.0969	61.6145	72.6623	69.7908	68.2283	60.4303	55.1416	54.5132	58.9968	56.5931	56.0598	62.501	65.4143	64.6061	54.821	59.4083	57.4805	56.171	58.3332	56.5005	66.0315	63.2851	66.1442	56.3333	59.7062	60.7206	cdk-7	0.197935	-0.112005	-0.0992462	0.0668652	-0.0966649	-0.104719	0.0880494	-0.0568904	3.8793e-05	0.000140504	0.0116321	0.0754382	0.0254644	0.0578017	0.018226	0.0499891	0.166111	0.000481081	0.00172944	-1.67373
WBGene00000409	cdk-8	50.9295	46.8892	46.8892	51.9527	56.0493	51.052	47.2583	50.5549	51.402	56.1475	56.0398	54.4551	61.3203	62.0466	59.6296	55.6961	59.4624	56.2596	52.2254	51.3464	52.0226	62.683	63.5584	62.4087	54.2623	55.6571	54.8021	cdk-8	0.134183	0.0420466	0.202587	0.338697	0.244253	0.104718	0.38262	0.186588	0.00251264	0.00610907	0.308722	0.556301	2.71745e-05	0.000155192	0.0154386	0.0434911	0.13611	0.00188501	0.00583964	0.671862
WBGene00000410	cdk-9	37.2315	43.2564	39.7927	45.6863	46.8303	45.6218	40.1753	38.7829	36.027	38.2241	35.7726	39.1604	46.0551	42.7851	43.7327	39.3057	39.2504	38.9531	37.1159	39.2986	38.9596	45.7435	43.9082	41.8107	37.7302	39.0266	37.7388	cdk-9	0.204761	-0.0590252	-0.0822691	0.145169	-0.0284356	-0.0566706	0.135187	-0.0655851	0.000194266	0.000604734	0.236569	0.479741	0.109476	0.192028	0.258944	0.398113	0.227438	8.3374e-05	0.000360099	-2.76456
WBGene00000411	cdl-1	256.945	250.018	253.238	259.063	254.279	260.392	255.194	242.297	218.16	231.38	224.31	232.278	252.297	244.359	252.972	235.74	230.357	225.488	234.426	231.38	224.528	254.616	254.279	245.959	234.426	230.83	226.593	cdl-1	0.02531	-0.0888218	-0.144096	-0.0208108	-0.137719	-0.139151	-0.0098294	-0.136155	0.483009	0.570253	0.0190387	0.104173	0.000430124	0.00170703	0.00059077	0.00290813	0.123285	0.00205893	0.00630643	-0.855576
WBGene00000412	cdr-1	2.48579	2.92065	3.27637	4.23247	3.56435	4.18344	3.68419	3.13819	3.13819	1.43259	1.32375	1.74784	1.96439	2.02485	1.51896	1.86386	1.87563	1.35728	2.39763	2.33053	2.36354	3.27372	3.42044	3.62781	3.86738	3.80135	3.55572	cdr-1	0.477965	0.210477	-0.933135	-0.645555	-0.786549	-0.27682	0.257882	0.383978	0.000289597	0.000871954	0.0867224	0.26388	3.17188e-06	2.43528e-05	0.0440403	0.102444	0.287579	0.0972135	0.170793	-0.308186
WBGene00000413	cdt-1	56.6435	59.5001	54.8351	53.1596	50.3182	49.4895	54.3975	73.7599	72.7849	68.1618	69.9877	68.5725	73.4741	74.8647	75.0371	74.8431	74.8995	74.4052	65.8844	69.0845	66.3023	74.6212	74.0558	74.9517	71.3856	71.3001	71.2834	cdt-1	-0.158062	0.218411	0.275308	0.387254	0.392224	0.235742	0.388656	0.325358	0.0240124	0.0447979	0.00187878	0.0249669	0.000189091	0.000840314	0.000964438	0.00438767	0.111946	0.0849192	0.152816	0.40662
WBGene00000414	cec-1	20.3937	19.0772	18.9916	21.873	19.1107	20.9337	18.6879	17.5918	18.6782	17.85	17.3782	17.7395	20.2612	20.3209	19.5644	19.6683	18.8314	21.2246	17.2611	18.0081	17.1979	20.399	21.5072	19.3498	19.8024	18.2756	20.0049	cec-1	0.0831319	-0.0908535	-0.142282	0.0409213	0.0310216	-0.157699	0.0693772	-0.0119861	0.139336	0.203366	0.112209	0.309127	0.0187657	0.0445468	0.0093517	0.0287657	0.183204	0.00338891	0.00975555	-1.28761
WBGene00000415	ced-1	64.287	62.8281	63.1129	83.3306	82.2869	86.0848	61.5367	72.4833	75.311	65.9138	64.7669	70.3454	94.4184	93.7149	91.2609	69.0519	68.4216	71.8426	70.9348	68.6676	71.5535	92.0358	90.8272	85.7029	77.2558	77.6313	73.2362	ced-1	0.403085	0.130257	0.0799418	0.554299	0.138292	0.150651	0.49827	0.2615	4.72708e-09	3.53097e-08	0.0133666	0.0825819	0.122363	0.209306	0.00507607	0.0173844	0.474357	1.59275e-10	2.04143e-09	5.93378
WBGene00000416	ced-2	78.1333	79.0279	79.5739	87.005	84.0558	88.8367	79.0663	63.4966	62.3208	65.9952	67.7118	70.1621	77.2684	72.9864	74.6683	71.9755	66.7091	71.0859	74.6967	66.1309	70.5937	71.2381	78.7661	74.8431	73.4741	71.3856	70.0564	ced-2	0.134605	-0.214436	-0.214651	-0.0740261	-0.175697	-0.161983	-0.0748462	-0.139376	0.0237212	0.0443355	0.00087463	0.0166189	0.000993462	0.00352543	0.00902234	0.0279406	0.140625	0.0241326	0.0530666	-0.655133
WBGene00000417	ced-3	194.547	188.181	196.297	208.564	205.603	213.206	195.805	193.275	201.685	210.119	211.197	214.63	225.247	220.371	210.534	204.248	207.688	211.28	203.756	204.567	199.336	217.693	218.37	219.546	210.438	209.298	205.887	ced-3	0.115337	0.0282009	0.135352	0.180232	0.106522	0.0694528	0.178973	0.111538	0.0002436	0.000745087	0.31416	0.561724	3.50067e-05	0.000193742	0.0177084	0.0487535	0.04488	0.11309	0.19284	0.331579
WBGene00000418	ced-4	41.7831	40.4458	42.7518	39.193	36.7393	35.9566	40.3772	47.2996	43.5854	41.5381	39.4652	40.3013	39.193	41.0576	40.5167	42.3066	40.7684	38.9531	40.9113	41.0447	37.5667	39.9303	40.6818	40.6986	40.2906	37.8618	42.441	ced-4	-0.158543	0.0674542	-0.0437978	-0.0500152	-0.0384572	-0.0654854	-0.0436713	-0.0541451	0.00464369	0.010578	0.187965	0.420346	0.401263	0.526697	0.210313	0.341133	-0.00621742	0.905609	0.939915	0.141957
WBGene00000419	ced-5	146.592	152.964	145.334	149.865	147.195	144.097	147.61	177.944	182.022	181.576	175.567	170.946	171.231	178.512	183.678	178.512	176.465	170.543	172.717	176.897	174.761	182.887	178.372	200.745	167.228	163.752	171.075	ced-5	-0.0110949	0.183416	0.247153	0.261749	0.240043	0.237608	0.333903	0.17492	0.831568	0.872039	0.00119406	0.0197497	4.30567e-05	0.000231506	6.8627e-05	0.000476357	0.0145959	0.775347	0.845235	0.0590562
WBGene00000420	ced-6	50.6015	54.9408	53.0777	65.8508	66.6036	68.0272	55.6865	52.9277	51.1798	62.6121	59.2661	64.8009	68.2692	69.2086	67.4216	61.0852	62.6248	62.2987	59.4624	59.86	58.5661	69.4222	65.6319	63.8102	59.0387	60.4081	58.8039	ced-6	0.339294	0.013078	0.237388	0.371625	0.232557	0.167451	0.329142	0.170489	1.32381e-09	1.07383e-08	0.741964	0.873665	1.43909e-06	1.22214e-05	0.000190632	0.0011106	0.134237	0.00151187	0.00479485	0.565474
WBGene00000421	ced-7	208.564	207.456	194.711	268.843	268.396	267.362	198.052	228.02	234.661	229.561	226.049	223.254	291.251	299.357	311.451	231.38	232.278	228.904	226.593	225.488	238.235	288.379	277.706	308.124	223.838	219.803	234.305	ced-7	0.398552	0.109117	0.152858	0.562508	0.181877	0.176839	0.515152	0.150575	8.45626e-10	7.09125e-09	0.0213675	0.11169	0.00206103	0.00668419	0.00047813	0.00241614	0.40965	4.14086e-10	4.89461e-09	2.67995
WBGene00000422	ced-8	5.9102	5.49391	6.3587	3.46942	3.27753	3.45266	6.26952	6.41824	6.29554	4.50968	4.58683	4.79918	3.89605	3.88849	4.31472	5.20612	5.62508	5.68181	5.23661	5.19817	5.86783	3.90772	4.61939	5.26695	5.69968	5.83261	5.51118	ced-8	-0.799412	0.0965033	-0.352626	-0.558341	-0.101084	-0.12644	-0.386162	-0.0589974	2.97673e-09	2.28849e-08	0.223486	0.464568	0.000332684	0.00137075	0.131058	0.238959	-0.205715	0.0351492	0.0730978	0.58338
WBGene00000423	ced-9	72.9864	67.129	71.8426	70.5401	69.9613	69.3801	73.0347	57.3298	55.6961	53.7452	54.702	57.5818	61.5877	60.2209	62.4898	57.5598	58.0276	58.9063	56.4384	54.3495	55.995	61.1848	64.0561	59.1273	59.661	57.2621	56.3454	ced-9	-0.0140405	-0.196174	-0.35127	-0.202319	-0.279728	-0.344848	-0.199671	-0.291015	0.808251	0.85393	0.00209979	0.0263843	2.47067e-06	1.95927e-05	2.86678e-06	3.41009e-05	0.148951	0.0208661	0.0469833	-0.424036
WBGene00000424	ced-10	43.2707	40.2838	43.1154	43.145	40.3176	41.9241	44.2491	54.3592	54.9408	50.0922	49.701	54.7106	54.0488	55.4732	51.9424	57.5598	56.6873	58.9548	51.5813	49.6263	48.2447	57.1081	55.243	52.8858	56.1475	55.15	54.9503	ced-10	-0.0141857	0.267674	0.286561	0.349712	0.450886	0.238632	0.384121	0.391291	0.811471	0.856202	6.30327e-05	0.00490892	2.97163e-05	0.000167807	0.000280319	0.00153574	0.0631508	0.272065	0.387641	0.220375
WBGene00000425	ced-11	9.30044	9.33587	10.201	9.61813	9.70115	10.2075	9.48384	9.11154	11.0926	8.65092	10.0589	9.2503	11.2985	12.0539	12.0816	9.44222	9.46007	9.78898	9.4821	9.02439	9.38218	11.285	9.77241	11.5989	10.2153	10.1318	10.6957	ced-11	0.0332728	0.0330743	-0.0467469	0.297833	-0.00497041	-0.0459964	0.171296	0.106978	0.648837	0.719057	0.647753	0.819865	0.533844	0.649703	0.535526	0.666558	0.34458	5.56149e-05	0.000249965	-7.37119
WBGene00000426	ced-12	81.1543	81.2026	74.4597	85.957	84.0558	80.5904	75.9077	82.2172	80.5594	83.2354	85.5588	84.0905	86.4608	88.4463	90.0173	83.0933	83.3132	83.9312	82.2026	81.738	85.2721	89.5965	91.2034	93.3403	78.9736	82.8443	85.5959	ced-12	0.0833231	0.0113892	0.0957774	0.162525	0.0815568	0.0745204	0.21131	0.0634299	0.0362423	0.064011	0.766078	0.88817	0.0179403	0.0428623	0.0595133	0.129504	0.066748	0.0890969	0.159111	0.696908
WBGene00000428	ceh-1	0.279805	0.23574	0.212778	0.0778796	0.142487	0.0557608	0.314909	0.176446	0.231815	0.204483	0.140385	0.127199	0.092211	0.0293713	0.192078	0.204483	0.133009	0.240311	0.170646	0.133009	0.155218	0.204483	0.0169575	0.176446	0.289881	0.115381	0.246492	ceh-1	-1.53592	-0.0466744	-0.674213	-1.64908	-0.377473	-0.673241	-1.59126	-0.271837	0.0270667	0.0497109	0.923365	0.967655	0.233402	0.348477	0.22848	0.362674	-0.974864	0.162511	0.258621	1.44593
WBGene00000429	ceh-2	0.222487	0.44667	0.212778	0.471284	0.401299	0.34017	0.413184	0.273059	0.34017	0.479036	0.594923	0.377175	0.345064	0.651577	0.192078	0.664084	0.693904	0.44407	0.324738	0.479036	0.44667	0.342374	0.374786	0.26335	0.543824	0.545169	0.282599	ceh-2	0.568387	0.307256	0.790834	0.393015	1.09393	0.575998	0.260183	0.691719	0.156818	0.224727	0.448018	0.681816	0.0492736	0.100203	0.15055	0.265955	-0.397819	0.284758	0.401379	-0.503037
WBGene00000430	ceh-5	0.249852	0.23574	0.246492	0.049777	0.174276	0.178866	0.284702	0.0866407	0.167091	0.204483	0.140385	0.163406	0.234285	0.115381	0.133009	0.350966	0.165854	0.299501	0.0728896	0.211465	0.155218	0.236835	0.341222	0.0957236	0.222487	0.378342	0.314909	ceh-5	-1.13753	-0.614174	-0.553495	-0.678227	0.0706527	-0.916229	-0.260095	0.292072	0.0495654	0.0834689	0.224413	0.465736	0.280831	0.401602	0.0952102	0.187007	-0.124732	0.819439	0.877873	0.225354
WBGene00000431	ceh-6	1.6095	1.56669	1.37149	1.01645	1.04794	0.833198	1.4	2.06303	1.458	1.55997	1.54945	1.77533	1.50479	1.47233	1.32981	1.60723	1.53086	1.91274	1.54886	1.33165	1.98548	1.29897	1.43741	1.57111	1.4346	1.55997	1.21588	ceh-6	-0.643208	0.0986596	0.109107	-0.0733409	0.155894	0.0842255	-0.0840437	-0.112166	0.00202245	0.00502415	0.535032	0.742758	0.503637	0.62316	0.601557	0.722543	-0.182447	0.278793	0.394959	-1.6722
WBGene00000433	ceh-8	0.341222	0.204483	0.413184	0.298269	0.0866407	0.0899412	0.212778	0.146522	0.299501	0.311275	0.112896	0.377175	0.175358	0.312969	0.049777	0.169382	0.253557	0.334011	0.324738	0.0957236	0.18888	0.167091	0.234285	0.221458	0.289881	0.278511	0.347299	ceh-8	-1.12086	-0.547029	-0.34239	-1.05812	-0.296705	-0.699906	-0.558367	-0.0291446	0.0674409	0.108973	0.282231	0.530984	0.496596	0.616839	0.199118	0.327345	-0.715729	0.233318	0.344122	2.09039
WBGene00000434	ceh-9	0.0808829	0.204483	0.0899412	0.210348	0.26335	0.210348	0.212778	0.119023	0.0899412	0.140385	0.274186	0.0957236	0.0654893	0.140385	0.192078	0.392683	0.0162814	0.0162814	0.100926	0.0590172	0.0888273	0.167091	0.127199	0.0957236	0.154068	0.142487	0.084508	ceh-9	1.02763	0.24613	0.442437	0.0926712	-1.43177	-0.475779	0.184828	0.135517	0.0896794	0.139433	0.695621	0.84826	0.479197	0.600882	0.500484	0.63663	-0.349766	0.575243	0.684498	-0.790544
WBGene00000435	ceh-10	0.735531	0.409061	0.513777	0.298269	0.234285	0.423735	0.511421	0.746402	0.231815	0.377175	0.407267	0.536143	0.405182	0.651577	0.628795	0.350966	0.507819	0.334011	0.324738	0.515529	0.44667	0.413184	0.447775	0.513777	0.543824	0.479036	0.842509	ceh-10	-0.810407	-0.252855	-0.306607	0.0123672	-0.471928	-0.385153	-0.257945	0.141796	0.0428251	0.0737988	0.452264	0.684962	0.382654	0.508148	0.271426	0.411673	0.318974	0.366122	0.486826	-1.04034
WBGene00000437	ceh-13	5.99745	6.76723	6.16759	2.60703	1.77363	2.09537	7.25249	5.36613	5.5329	6.00416	5.3207	4.88074	2.59266	2.40223	2.29126	5.80371	5.34847	6.78882	5.00708	4.6527	4.60396	2.45579	2.95636	2.5241	5.6139	4.45767	5.14253	ceh-13	-1.53553	-0.0646222	-0.227422	-1.36419	-0.0722387	-0.398407	-1.24044	-0.316635	2.6012e-10	2.38014e-09	0.553611	0.756781	0.0556594	0.110675	0.00191909	0.00772038	-1.13677	2.64482e-08	2.27389e-07	4.9985
WBGene00000438	ceh-14	3.02367	2.43714	3.07979	0.94401	1.07869	0.748237	3.08772	3.26601	2.46692	3.21686	2.53869	2.8657	1.1227	1.15263	1.18521	3.2346	2.81408	2.92311	2.98751	2.98414	2.0618	1.12065	1.04124	1.18521	1.77411	2.93569	2.38351	ceh-14	-1.62719	0.045919	0.00887092	-1.29735	0.0634494	-0.10326	-1.34967	-0.293287	2.0922e-07	1.18394e-06	0.755873	0.881379	0.95357	0.970957	0.503026	0.638941	-1.30622	8.20963e-07	5.35801e-06	-147.248
WBGene00000439	ceh-16	0.700701	0.44667	0.652248	0.236835	0.423735	0.27634	0.682401	0.537469	0.412165	0.513777	0.500479	0.567005	0.597377	0.520555	0.571235	0.427577	0.346131	0.334011	0.513777	0.557617	0.479036	0.167091	0.833198	0.423735	0.543824	0.343787	0.282599	ceh-16	-0.98892	-0.145378	-0.171682	-0.083073	-0.709406	-0.207534	-0.611435	-0.661351	0.0150377	0.0297787	0.640215	0.816133	0.594608	0.701391	0.516173	0.649876	0.0886094	0.786935	0.853956	-0.516124
WBGene00000441	ceh-18	13.9707	13.6676	14.0287	7.96828	7.35569	7.97053	15.0829	16.4463	18.6262	16.8051	16.5133	17.2168	10.8886	10.5846	10.9754	15.4391	15.2006	16.3908	17.2168	15.5594	16.0909	9.43459	9.90222	8.9124	14.5466	14.9448	16.4557	ceh-18	-0.83725	0.257097	0.27862	-0.361424	0.175647	0.231586	-0.557029	0.137625	9.47044e-12	1.08064e-10	0.00029749	0.00993558	0.000140068	0.000647129	0.00100344	0.00452876	-0.640044	3.02594e-10	3.66534e-09	-2.29719
WBGene00000442	ceh-19	0.37194	0.559924	0.722322	0.94401	0.782896	0.684565	0.748237	0.47777	0.412165	0.609498	0.86597	0.698364	1.07009	0.966785	1.03084	0.698364	0.66043	0.689154	0.416662	0.439527	0.479036	0.778434	0.654265	0.467086	0.934651	0.778434	0.62757	ceh-19	0.606101	0.0174694	0.440957	0.946534	0.369619	-0.245223	0.258457	0.545017	0.0207076	0.0393381	0.948263	0.97865	0.0941773	0.170089	0.396598	0.541402	0.505578	0.0338937	0.070911	1.14655
WBGene00000443	ceh-20	14.9365	16.1883	15.5653	17.803	18.6585	16.7383	15.6977	17.5317	17.4006	19.0663	19.745	19.5367	22.2373	22.3556	22.1411	20.0977	18.9193	19.8137	17.0955	17.5367	19.5894	20.8622	20.0595	17.7936	16.4759	18.4685	18.6666	ceh-20	0.189922	0.116431	0.324284	0.518103	0.334505	0.214122	0.335892	0.199697	0.0060639	0.0133869	0.0798579	0.251976	2.09574e-05	0.000124044	0.00230394	0.00901182	0.19382	0.00344685	0.00989609	0.597685
WBGene00000444	ceh-21	19.5004	18.3043	19.6543	17.803	16.6822	16.3815	19.6934	16.0196	14.6901	15.1946	13.228	15.6101	16.4501	16.9718	15.4138	16.2905	16.9355	17.0811	15.3132	15.9965	14.8722	15.5822	18.0208	14.9741	17.6721	17.1057	17.5233	ceh-21	-0.173356	-0.194729	-0.382961	-0.233229	-0.189109	-0.315628	-0.239631	-0.136125	0.0282993	0.0516405	0.014271	0.0864171	3.97126e-05	0.000215865	0.000309146	0.00166686	0.149732	0.0746268	0.13738	-0.390985
WBGene00000445	ceh-22	1.32637	0.924219	1.05492	0.819985	0.898	1.04747	1.52494	1.18846	1.19437	0.84371	1.00081	1.09046	0.865354	0.966785	0.898	1.00788	1.27895	1.04633	0.84371	0.907391	1.09529	1.15628	0.908736	1.07104	1.00788	1.04526	1.15016	ceh-22	-0.267897	0.239914	-0.166623	-0.270379	0.0140981	-0.22448	-0.0804075	-0.0439253	0.145739	0.211149	0.147892	0.364783	0.360405	0.486208	0.21743	0.34909	-0.103756	0.584701	0.692183	0.622702
WBGene00000446	ceh-23	0.0808829	0.0557608	0.0557608	0.100299	0.174276	0.240311	0.0866407	0.0866407	0.052684	0.108754	0.308848	0.0661117	0.204483	0.0557608	0.100299	0.169382	0.165854	0.0648727	0.100926	0.0957236	0.26335	0.0899412	0.0899412	0.0180247	0.0866407	0.084508	0.115381	ceh-23	1.33201	0.22345	1.02058	0.72419	0.916701	1.11097	-0.219414	0.579342	0.0533602	0.0889609	0.755865	0.881379	0.140245	0.233075	0.107046	0.204473	-0.296385	0.62893	0.730366	-0.29041
WBGene00000447	ceh-24	0.431352	0.371314	0.513777	0.471284	0.513777	0.481012	0.314909	0.273059	0.44916	0.513777	0.274186	0.663592	0.671813	0.443556	0.721714	0.511421	0.346131	0.299501	0.292279	0.252514	0.549909	0.377175	0.753274	0.467086	0.289881	0.241803	0.559924	ceh-24	0.159946	-0.385581	0.0759593	0.449075	-0.249577	-0.350065	0.233376	-0.373093	0.638869	0.710596	0.303847	0.551711	0.829102	0.886148	0.354848	0.499323	0.373115	0.27341	0.389237	4.91205
WBGene00000448	pros-1	3.75996	4.15302	2.8929	1.95476	2.24082	1.98548	3.05949	3.07851	3.9396	3.61753	3.06777	4.33299	3.0765	2.86149	2.74156	4.52264	4.00637	3.97528	4.10481	3.41948	3.53991	3.1658	3.15806	3.45024	3.86738	3.56787	4.24504	pros-1	-0.795643	-0.100119	0.0419561	-0.297591	0.219898	0.0564666	-0.1328	0.126276	1.54903e-05	6.07953e-05	0.440156	0.67552	0.746403	0.823871	0.658571	0.769263	-0.339547	0.0188724	0.0430919	-8.09292
WBGene00000449	ceh-27	2.1354	1.86386	1.95317	0.698364	1.02177	0.974606	2.18219	2.51784	1.60137	1.68997	1.72966	1.77533	0.973362	1.04579	0.948213	2.12492	1.87563	1.97225	1.96709	1.68088	1.31301	0.980287	0.721714	0.708856	1.63246	1.52847	1.38307	ceh-27	-1.17529	0.0680639	-0.194739	-0.998219	-0.00355465	-0.27152	-1.30129	-0.391308	2.94004e-06	1.33245e-05	0.64092	0.816466	0.22372	0.336802	0.0944493	0.185888	-0.803479	0.000245295	0.000948571	4.12592
WBGene00000451	ceh-30	0.760427	0.59979	0.954048	0.347299	0.371314	0.34017	0.748237	0.907391	0.201717	0.609498	0.534617	0.663592	0.405182	0.140385	0.484815	0.664084	0.66043	0.94589	0.699597	0.439527	1.0519	0.342374	0.269248	0.346131	0.651577	0.84371	0.662475	ceh-30	-1.08341	-0.502099	-0.326193	-1.32639	-0.00808971	-0.130416	-1.23248	-0.0884446	0.0215484	0.0407703	0.190451	0.423287	0.382309	0.507883	0.707809	0.806913	-1.00019	0.0435912	0.0879572	3.06627
WBGene00000452	ceh-31	0.580219	0.44667	0.378342	0.403607	0.287354	0.210348	0.284702	0.571235	0.44916	0.479036	0.698364	0.536143	0.314909	0.312969	0.374208	0.350966	0.507819	0.270359	0.571235	0.365129	0.479036	0.486198	0.341222	0.306282	0.616643	0.778434	0.594923	ceh-31	-0.644032	-0.151362	0.278788	-0.476435	-0.351988	0.0212149	-0.30234	0.503503	0.0636352	0.103624	0.609516	0.797135	0.326002	0.450383	0.941968	0.965199	-0.755223	0.0223374	0.0497733	-2.70895
WBGene00000453	ceh-32	9.19686	9.3671	8.5901	3.48944	4.94326	4.30674	9.73217	9.79592	9.84098	7.97053	8.42958	8.29935	6.93721	7.69441	8.12491	9.78522	9.23973	10.033	7.28506	7.62266	8.11376	5.92667	5.77251	7.11343	8.82325	8.7422	8.5816	ceh-32	-1.12562	0.114554	-0.137097	-0.260408	0.0985201	-0.242601	-0.549602	-0.0533262	3.5847e-12	4.37188e-11	0.138	0.350335	0.096854	0.173983	0.00526078	0.017925	-0.12331	0.148607	0.240864	0.899435
WBGene00000454	ceh-33	0.404605	0.371314	0.447775	0.179976	0.26335	0.366258	0.284702	0.341222	0.299501	0.412165	0.470739	0.346131	0.405182	0.443556	0.279805	0.27634	0.346131	0.240311	0.44916	0.252514	0.298269	0.44916	0.269248	0.467086	0.289881	0.343787	0.454863	ceh-33	-0.681709	-0.406501	-0.0130122	-0.131194	-0.525593	-0.311087	-0.10504	-0.196339	0.0432269	0.0743804	0.186925	0.418935	0.964005	0.977509	0.30957	0.452264	-0.118182	0.691623	0.781027	9.08235
WBGene00000455	ceh-34	2.42996	2.48025	2.2583	1.77256	2.15933	1.62378	2.45944	2.85849	3.3307	2.17851	1.79548	2.18456	2.08912	1.67496	2.08912	3.39893	2.46225	2.61438	1.96709	2.09289	2.2097	2.15096	2.51926	1.6095	2.88791	2.82008	2.42501	ceh-34	-0.380831	0.254591	-0.221307	-0.304412	0.212105	-0.19803	-0.194163	0.181925	0.0233249	0.0437077	0.078083	0.24841	0.168036	0.268569	0.205214	0.334993	-0.0831051	0.616207	0.719247	0.37552
WBGene00000457	ceh-36	1.44118	1.37016	0.884456	0.160002	0.234285	0.34017	1.86853	1.43741	1.00566	0.777282	0.698364	1.18395	0.405182	0.312969	0.163406	0.851439	0.819985	0.819985	0.699597	0.826354	0.733426	0.342374	0.201717	0.547709	0.760427	0.879465	0.807674	ceh-36	-2.38365	0.225108	-0.461317	-2.10711	-0.538525	-0.687201	-1.87512	-0.56329	2.19743e-05	8.36536e-05	0.308725	0.556301	0.0872664	0.159919	0.0166368	0.0462974	-1.64579	0.000485696	0.00174459	3.5676
WBGene00000458	ceh-37	6.03366	6.34361	6.16759	4.58203	4.29412	4.36235	6.95536	5.18423	5.38544	3.71284	3.77174	4.03602	4.09664	4.87245	3.66147	4.32671	4.09664	4.86741	5.38813	5.0448	4.70513	3.71159	3.77999	3.71384	5.7731	5.45878	5.54717	ceh-37	-0.479134	-0.0881505	-0.67805	-0.552547	-0.47425	-0.28752	-0.718118	-0.142419	4.84394e-05	0.000171264	0.344083	0.589159	7.58477e-07	7.01036e-06	0.00580649	0.0194412	0.125503	0.27544	0.391364	-0.185094
WBGene00000459	ceh-38	118.519	113.65	112.661	134.892	130.701	136.664	115.126	136.164	132.078	144.207	142.982	141.163	162.815	159.744	160.585	147.38	148.419	147.039	136.263	139.392	134.606	155.669	155.669	160.184	141.911	143.569	146.157	ceh-38	0.222013	0.148221	0.312514	0.486459	0.36078	0.250121	0.450598	0.323672	4.42914e-06	1.93609e-05	0.000753006	0.0153672	1.03818e-08	1.6156e-07	6.29103e-07	9.88745e-06	0.173945	9.60617e-05	0.000408798	0.5566
WBGene00000460	ceh-39	26.5274	25.7048	25.912	23.2994	21.036	23.3961	26.8704	22.3017	21.6768	23.0564	20.7361	24.4756	23.9454	23.7105	22.9004	24.4013	23.9887	25.7254	21.4464	21.8815	22.0799	22.4479	23.2055	20.4685	23.915	21.4999	22.9004	ceh-39	-0.205938	-0.144921	-0.19457	-0.146735	-0.0751468	-0.256909	-0.237122	-0.195747	0.00379597	0.00885014	0.0318918	0.142126	0.00638653	0.017735	0.000543427	0.00270253	0.0478349	0.483912	0.60025	-0.245849
WBGene00000461	ceh-40	5.38131	4.89696	4.84579	2.90064	3.18686	3.45266	4.92736	4.62534	4.96889	4.2065	3.41875	3.73407	3.75545	3.68122	3.69108	4.96275	4.19545	4.81452	3.47978	4.06546	3.50106	3.90772	3.60338	4.37155	4.69854	4.80269	4.10481	ceh-40	-0.680211	-0.0621649	-0.423173	-0.446222	-0.123725	-0.466786	-0.365682	-0.156208	3.26048e-07	1.7773e-06	0.490841	0.713695	0.000187905	0.00083547	5.01208e-05	0.000365074	-0.0230495	0.826119	0.883014	0.0544684
WBGene00000462	ceh-41	6.9469	7.59724	6.76822	6.75021	6.83326	7.24766	8.13336	7.18806	7.26174	7.55049	6.0325	7.66331	7.71171	6.95174	7.01718	7.71652	7.6138	8.66748	6.90887	6.53841	6.24223	9.26252	8.72148	9.08593	7.59652	7.6669	7.98107	ceh-41	-0.0309546	0.0870519	-0.00413145	0.0279887	0.177837	-0.108009	0.348101	0.128463	0.709013	0.770311	0.285611	0.534328	0.960673	0.975445	0.20599	0.335825	0.0321202	0.703686	0.790691	-7.77454
WBGene00000463	ceh-43	4.38145	5.16976	4.50254	3.01578	3.50891	2.72122	4.73237	5.3276	4.70045	4.93232	5.15904	4.71573	5.66637	4.917	5.62122	6.92635	6.08165	5.40613	5.0893	4.48757	4.56376	5.24488	4.45024	5.34911	6.26495	5.62245	5.75429	ceh-43	-0.609414	0.0787009	0.0796384	0.209213	0.379494	0.019619	0.0945098	0.336421	1.61816e-05	6.32371e-05	0.443388	0.678143	0.448313	0.572362	0.850924	0.907407	0.129575	0.214473	0.322178	1.62704
WBGene00000464	ceh-44	103.724	102.874	106.7	111.838	107.586	112.312	100.011	109.26	110.493	108.776	111.808	108.896	119.281	122.383	120.247	114.773	111.034	111.255	111.862	110.605	110.804	116.939	119.281	118.153	112.685	108.545	112.717	ceh-44	0.0825939	0.0273334	0.0724	0.208209	0.104562	0.0893994	0.177741	0.091771	0.0167947	0.0327687	0.407038	0.648076	0.0350843	0.0754041	0.0102766	0.0310669	0.135809	0.00025317	0.000975335	1.87582
WBGene00000465	cpg-1	840.012	819.234	801.894	941.946	915.32	898.753	778.187	771.061	746.16	840.012	845.773	875.119	972.473	1071.24	1031.22	946.352	921.334	911.652	764.314	778.187	775.575	946.352	907.777	950.313	807.108	764.314	764.314	cpg-1	0.163598	-0.10038	0.0575647	0.320194	0.174563	-0.0866661	0.187628	-0.0758959	9.70897e-06	3.9665e-05	0.00287871	0.0319658	0.071574	0.136013	0.00893839	0.0277301	0.262629	2.04111e-09	2.14576e-08	4.56233
WBGene00000466	cel-1	71.4067	65.6634	65.8726	70.4285	72.6318	64.6762	65.6179	78.5677	75.4908	73.27	73.4741	73.912	79.995	80.113	80.6408	76.6576	74.9792	75.0268	71.3978	72.8737	74.3742	81.7936	77.8515	90.6766	73.1215	75.7233	73.3867	cel-1	0.0325026	0.109056	0.120659	0.246292	0.158582	0.106601	0.295955	0.130894	0.544333	0.627676	0.0464263	0.178777	0.0304423	0.0669992	0.0525938	0.117812	0.125632	0.0232298	0.0514018	1.04122
WBGene00000467	cep-1	67.7118	65.6038	64.0392	63.0421	64.9031	62.8281	68.0504	60.1306	62.6544	63.0603	58.2201	62.7996	57.8958	54.76	60.5645	60.2483	59.9449	60.7903	61.7496	61.0122	61.5457	61.7735	60.938	62.8404	59.7134	59.159	62.7613	cep-1	-0.0494857	-0.0500568	-0.100853	-0.190827	-0.124866	-0.0985459	-0.0899803	-0.12068	0.241328	0.322817	0.233556	0.476244	0.0228611	0.0527332	0.024879	0.0644887	-0.0899741	0.0443462	0.0892835	0.892129
WBGene00000468	ces-1	0.308848	0.559924	0.212778	0.049777	0.11646	0.12278	0.212778	0.306282	0.412165	0.140385	0.374786	0.409693	0.204483	0.204483	0.252514	0.469577	0.346131	0.479036	0.416662	0.174276	0.34017	0.125671	0.306282	0.346131	0.324738	0.44407	0.314909	ces-1	-1.92908	-0.150404	-0.222979	-0.593221	0.376889	-0.144997	-0.501495	0.123014	0.00438435	0.0100585	0.715867	0.860153	0.607662	0.711952	0.731109	0.824385	-0.370242	0.436251	0.556843	1.66043
WBGene00000469	ces-2	3.07979	2.87382	2.73936	0.765711	0.594923	0.656635	2.88791	2.61438	3.13819	2.27976	2.77598	2.6574	1.53086	1.65086	1.73917	2.92001	2.78854	3.06189	2.06007	2.13485	2.4346	1.85114	1.79983	1.74723	3.11084	2.70038	2.62767	ces-2	-2.10053	-0.0172478	-0.175189	-0.824201	0.0133693	-0.397431	-0.68411	-0.0467677	1.88023e-11	2.03832e-10	0.865291	0.938636	0.11317	0.196799	0.00123736	0.00537768	-0.649011	1.59014e-05	8.00928e-05	3.70463
WBGene00000472	cey-1	439.073	417.746	427.025	479.72	486.507	486.507	427.441	441.594	417.081	429.678	429.678	435.081	528.207	531.414	482.87	418.075	425.917	449.817	446.713	427.025	464.774	475.513	478.082	429.25	444.243	453.846	415.568	cey-1	0.17782	0.00243405	0.0119019	0.264025	0.0116384	0.059582	0.107335	0.0322255	0.000135949	0.000437633	0.952563	0.980161	0.773037	0.844573	0.153243	0.269315	0.252123	9.67096e-07	6.2298e-06	21.1834
WBGene00000473	cey-2	1228.76	1201.77	1211.65	1490.29	1464.47	1451.39	1201.77	1350.56	1322.7	1451.39	1464.47	1394.74	1545	1490.29	1451.39	1436.32	1436.32	1436.32	1336.62	1295.3	1275.47	1490.29	1490.29	1451.39	1350.56	1350.56	1336.62	cey-2	0.274798	0.087004	0.242123	0.300539	0.242386	0.10148	0.28335	0.148611	6.1143e-10	5.2646e-09	0.00753948	0.0578844	9.37467e-09	1.47972e-07	0.00232474	0.00907888	0.058416	0.0608226	0.116256	0.241266
WBGene00000474	cey-3	586.954	577.487	589.152	618.58	606.737	589.152	597.72	518.561	529.828	570.408	511.641	536.102	522.272	511.641	508.943	533.041	526.772	557.752	529.828	515.103	522.272	538.289	541.948	540.35	538.289	538.289	538.289	cey-3	0.0494033	-0.0935943	-0.117555	-0.184741	-0.116287	-0.161866	-0.113805	-0.118979	0.188123	0.26202	0.0166949	0.0955953	0.00370073	0.0111446	0.000154414	0.000934392	-0.0671863	0.0849741	0.152816	0.571533
WBGene00000475	cey-4	579.164	561.556	583.151	568.989	565.454	583.151	573.828	585.054	563.616	551.315	565.454	543.603	613.738	597.72	591.402	567.275	573.828	571.81	557.752	568.989	571.81	604.951	591.402	547.912	579.164	586.954	577.487	cey-4	-0.0056436	-0.00112903	-0.0547258	0.0645217	-0.0091246	-0.02184	0.0172214	0.0163264	0.839402	0.878031	0.967531	0.986579	0.0588988	0.116001	0.435957	0.579419	0.119248	0.000191313	0.00075805	-2.179
WBGene00000476	cfi-1	2.23362	2.32367	2.15096	1.86496	1.92566	2.18712	2.06512	3.4441	2.71155	2.61322	2.8433	3.32169	2.03797	2.66143	2.68494	2.69708	2.60803	2.92311	2.45767	2.8015	2.9759	2.9375	2.43144	2.18328	2.68297	2.67443	2.62767	cfi-1	-0.172408	0.262808	0.389956	0.126435	0.298345	0.286261	0.173025	0.253136	0.292072	0.377496	0.0854817	0.261569	0.0135663	0.0336964	0.0638112	0.136934	-0.263521	0.0835089	0.150743	-0.675771
WBGene00000477	cft-1	3.10582	3.40169	2.45629	3.03323	3.00455	2.89216	2.55492	3.97528	3.52341	3.51615	3.67767	3.46362	3.69623	3.90602	3.49058	3.93833	4.09664	3.84531	3.2346	3.97416	3.8929	3.56913	3.84904	4.12633	3.26182	3.41441	3.27372	cft-1	0.0109901	0.154061	0.264096	0.325848	0.422578	0.310267	0.37306	0.1675	0.933967	0.952226	0.235509	0.478933	0.0482194	0.0983472	0.0197883	0.053431	0.0617521	0.621322	0.723757	0.233824
WBGene00000478	cfz-2	5.50015	5.95862	4.74061	1.8208	1.95317	2.12492	6.11805	5.71704	5.75969	4.80033	4.24504	4.91469	4.13339	3.57672	4.1931	5.54379	5.54316	6.26396	4.75369	4.72498	4.70513	3.76454	3.52341	3.1907	5.35667	5.56351	5.36136	cfz-2	-1.454	0.128001	-0.205263	-0.441865	0.110969	-0.182156	-0.614224	0.0161348	2.48563e-12	3.09704e-11	0.134057	0.344505	0.0306132	0.0672902	0.0486817	0.111054	-0.236602	0.0204564	0.0461984	1.15267
WBGene00000479	cgh-1	1490.29	1490.29	1425.44	1825.64	1802.97	1825.64	1425.44	1781.71	1873.28	2005.1	1896.55	2005.1	2210.47	2345.38	2210.47	2005.1	2037.76	2037.76	1825.64	1781.71	1873.28	2077.75	2077.75	2113.09	1825.64	1825.64	1896.55	cgh-1	0.3083	0.194227	0.423022	0.619042	0.465346	0.315099	0.508672	0.332434	2.4706e-06	1.14144e-05	0.000940559	0.0172953	8.07075e-09	1.29662e-07	1.74732e-06	2.27431e-05	0.19602	0.000646955	0.00225888	0.46338
WBGene00000480	cgp-1	165.55	163.575	167.641	206.201	205.373	206.201	171.231	131.627	127.408	130.747	128.534	142.777	161.195	158.215	152.285	140.083	146.21	151.897	128.583	137.836	131.39	163.29	162.966	145.433	139.392	143.198	134.49	cgp-1	0.314362	-0.218061	-0.305011	-0.0746024	-0.179899	-0.32185	-0.0741301	-0.252325	2.46449e-05	9.30655e-05	0.00203522	0.0259168	6.55555e-05	0.000333285	3.04722e-05	0.000240611	0.230408	0.00153332	0.00485314	-0.755411
WBGene00000481	cha-1	2.08243	2.25894	2.53023	2.40223	2.95181	2.37327	2.74156	2.5805	2.43144	2.40565	2.68225	2.92438	2.38801	2.61055	2.48025	2.26852	2.24855	2.45068	2.00031	2.60208	2.32654	2.9375	2.83571	2.64564	2.16333	2.46225	2.23764	cha-1	0.164537	0.182629	0.229525	0.129059	0.0299159	-0.000714912	0.303488	0.00425471	0.16818	0.238451	0.123582	0.328412	0.0596022	0.117006	0.99528	0.997003	-0.100466	0.394359	0.51627	-0.437711
WBGene00000482	chd-3	79.7902	74.683	74.23	66.3288	65.4615	65.6859	75.5901	87.4223	89.3448	91.0052	88.948	89.7608	94.7123	92.7973	91.5636	86.3954	83.6815	83.4823	89.3966	91.6095	92.6957	83.3832	86.0164	84.5607	84.0731	82.2741	83.3306	chd-3	-0.211747	0.136502	0.23772	0.287191	0.147542	0.258318	0.150924	0.126369	3.34212e-05	0.000122634	0.00273565	0.030943	4.00805e-06	2.9926e-05	9.43115e-07	1.37293e-05	0.0494713	0.239245	0.351342	0.208107
WBGene00000484	che-2	0.341222	0.34017	0.615502	0.32204	0.45035	0.748237	0.610753	0.404605	0.525336	0.513777	0.500479	0.663592	0.345064	0.367495	0.312325	0.736668	0.507819	0.793842	0.669264	0.708856	0.549909	0.707884	0.654265	0.75067	0.324738	0.636929	0.520555	che-2	0.170828	0.286933	0.430185	-0.282312	0.68756	0.625517	0.757322	0.200489	0.590084	0.6681	0.357732	0.601529	0.172929	0.274747	0.0446305	0.103479	-0.712496	0.0406504	0.0829096	-1.65626
WBGene00000485	che-3	3.66831	4.54398	3.85381	4.23247	4.52499	4.54159	3.55328	5.40252	5.38544	6.00416	5.46254	6.13192	6.16759	6.12695	7.08918	5.7023	6.28329	5.08798	5.75493	5.64502	5.06048	6.0396	6.04295	5.74391	5.10713	6.03604	6.09873	che-3	0.148765	0.228975	0.558722	0.691782	0.505247	0.461266	0.578455	0.524666	0.259227	0.342174	0.0812339	0.254793	0.000106139	0.00050808	0.000904439	0.0041609	0.13306	0.250695	0.364074	0.23815
WBGene00000487	che-6	0.112896	0.204483	0.12278	0.129589	0.0866407	0.12278	0.151511	0.273059	0.231815	0.140385	0.274186	0.163406	0.12278	0.174276	0.192078	0.204483	0.100299	0.0927874	0.231815	0.479036	0.224709	0.125671	0.0899412	0.140385	0.154068	0.142487	0.115381	che-6	-0.334868	0.607995	0.396426	0.191019	-0.222976	1.05565	-0.292037	-0.0389773	0.477141	0.565247	0.147848	0.364727	0.357423	0.483139	0.0129327	0.0375402	-0.205407	0.626899	0.728641	-0.518147
WBGene00000488	che-7	0.760427	1.0391	1.05492	0.698364	1.07869	0.864249	0.748237	0.59979	0.826967	1.15628	0.771209	0.814351	0.999031	0.936158	0.751275	0.893399	0.507819	0.84371	0.819985	0.907391	0.733426	0.742306	0.51895	0.829635	0.795519	0.479036	0.842509	che-7	-0.130478	-0.395555	-0.0681383	-0.067614	-0.38522	-0.203397	-0.486424	-0.465049	0.58003	0.659599	0.117105	0.317478	0.773921	0.845379	0.400471	0.545403	0.00052429	0.998274	0.998937	-0.0076945
WBGene00000490	che-11	1.32637	1.0391	0.784105	1.24735	1.18946	0.864249	0.842509	1.43741	1.56565	1.26689	1.07622	1.53237	1.68664	1.8148	1.73917	1.23973	1.12379	1.21588	1.22091	1.18846	1.24336	1.22698	1.13279	1.25903	1.25337	1.07104	1.43306	che-11	0.0859207	0.249305	0.319677	0.758124	0.205967	0.23931	0.22026	0.265547	0.692647	0.755983	0.237986	0.481304	0.138961	0.23145	0.263536	0.403016	0.438447	0.0303427	0.0646091	1.37153
WBGene00000491	che-12	1.07869	1.22091	0.884456	1.17421	1.35584	1.1086	0.913106	1.12004	1.30454	1.35842	1.18521	1.12127	1.76935	1.30143	1.302	1.04526	1.32981	0.97925	1.15771	1.14768	1.52607	1.01875	1.17673	1.29495	1.50287	1.24103	1.4995	che-12	0.202451	0.0601051	0.209581	0.46476	0.0778031	0.26902	0.130622	0.426591	0.281345	0.365947	0.749726	0.877628	0.271112	0.390447	0.152164	0.268069	0.255179	0.16155	0.257351	1.21757
WBGene00000492	che-13	0.760427	0.633246	0.954048	0.646365	0.898	0.915166	0.682401	0.814351	1.00566	0.513777	0.565771	0.663592	0.781823	0.853299	0.973362	0.589691	0.819985	0.909788	0.819985	0.746979	0.768794	1.19002	0.685773	0.872637	0.973362	0.741324	0.876408	che-13	0.0458409	0.0773389	-0.413667	0.155232	0.00116919	0.0105319	0.20509	0.145307	0.837315	0.876425	0.725232	0.864013	0.112384	0.195942	0.962863	0.978755	0.568899	0.0313124	0.0663903	-1.37526
WBGene00000493	che-14	3.20207	2.99371	3.07979	4.00705	4.05483	3.97304	3.33144	3.26601	3.85831	3.25557	2.94346	3.32169	4.18243	4.72259	4.05378	3.59341	3.14301	3.18438	3.96059	3.0546	3.84904	4.17873	3.84904	3.31485	4.02517	3.52784	2.92188	che-14	0.373104	0.161888	0.0376817	0.479227	0.0856777	0.226458	0.292643	0.163	0.00292971	0.00699962	0.176538	0.405499	0.76033	0.834628	0.0634358	0.13631	0.441545	0.000793009	0.00270467	11.7178
WBGene00000496	chs-1	405.692	400.983	391.079	415.568	411.667	409.999	394.361	481.17	479.72	496.05	473.204	473.204	575.714	573.828	593.437	491.396	492.824	485.15	464.774	473.204	479.72	581.049	545.752	655.312	475.513	464.774	497.206	chs-1	0.0469589	0.171088	0.267614	0.541025	0.294754	0.242876	0.566356	0.262582	0.387133	0.476471	0.00311102	0.0335344	2.40953e-05	0.000139767	8.3856e-05	0.000562723	0.27341	1.28834e-05	6.60995e-05	1.02166
WBGene00000497	chs-2	6.99299	7.04363	5.53385	7.12268	7.55527	6.78442	6.35816	7.6419	8.47844	8.88588	8.67213	9.84098	9.57927	9.52594	8.93477	8.6565	8.91461	9.16801	9.85679	9.39628	9.16801	8.93721	9.84098	8.53603	7.52851	8.61028	8.4176	chs-2	0.140679	0.19275	0.495318	0.527719	0.460989	0.547875	0.491951	0.333455	0.156712	0.224607	0.0523427	0.193083	1.20764e-05	7.68524e-05	2.10564e-06	2.65182e-05	0.0324009	0.71495	0.79988	0.0654145
WBGene00000498	chk-1	92.7568	97.4416	99.2394	100.348	98.4173	101.829	93.7793	74.23	75.311	76.3518	76.2774	83.8772	78.3843	79.7267	75.7577	76.873	79.043	78.2709	77.1696	83.2673	84.9085	83.0809	86.1413	76.6022	83.144	82.0159	76.8862	chk-1	0.0556842	-0.255766	-0.289605	-0.30581	-0.303569	-0.239937	-0.232906	-0.257128	0.339941	0.427835	0.000149984	0.00717568	3.81944e-05	0.000209052	0.000330291	0.0017601	-0.0162049	0.791815	0.857857	0.0559551
WBGene00000499	chk-2	15.4214	15.1589	15.3311	11.0127	10.1134	11.305	15.7409	16.1621	16.6757	13.8918	15.0984	14.8009	10.8057	10.0104	11.4699	14.621	13.8054	13.9117	15.3132	17.2168	16.7034	13.2601	12.8754	13.1246	16.8815	15.4905	15.5224	chk-2	-0.503692	0.0795494	-0.0693659	-0.514467	-0.120823	0.0945093	-0.227738	0.0595221	4.88633e-09	3.64366e-08	0.159094	0.381101	0.236411	0.352088	0.0989895	0.192514	-0.445101	7.35309e-08	5.84444e-07	6.41672
WBGene00000500	chn-1	62.5248	64.4018	61.3091	70.0564	67.7936	67.7936	60.9926	61.1338	61.426	69.221	68.7081	68.3171	69.8023	69.7437	75.5184	65.8169	65.9138	67.3138	67.2226	70.4419	66.5935	68.6086	71.7302	71.0333	61.7669	59.9639	64.2646	chn-1	0.128998	-0.035724	0.132365	0.19089	0.0818096	0.117333	0.167392	-0.0174941	0.00101833	0.0027104	0.323	0.569975	0.000845846	0.00307061	0.00245333	0.00949144	0.0585253	0.107161	0.185014	0.442152
WBGene00000501	cho-1	1.84833	1.93159	2.45629	1.79789	2.18328	2.09537	2.10713	1.56669	1.63609	1.95912	1.95853	1.85854	1.8208	2.26581	2.05706	1.73755	1.91524	1.77533	2.45767	1.83858	1.9506	1.88769	2.39888	1.85373	1.4346	1.77411	1.66905	cho-1	-0.0375179	-0.226357	-0.0985839	-0.0130728	-0.18458	0.0179861	-0.00912293	-0.34476	0.795613	0.842782	0.136331	0.347879	0.511142	0.629933	0.90074	0.93888	0.085511	0.572907	0.682233	-0.867394
WBGene00000502	chp-1	72.8567	73.9894	75.2329	58.2583	60.4081	58.8375	75.823	71.1832	70.1794	66.1799	66.4488	64.3917	55.0354	56.4106	55.497	67.0744	67.7014	69.0991	63.9435	62.208	62.2861	57.8263	57.7612	57.7851	64.9829	66.0315	69.0845	chp-1	-0.323585	-0.0318564	-0.173059	-0.411264	-0.122315	-0.236062	-0.356775	-0.150745	1.34732e-10	1.27633e-09	0.327158	0.573856	1.265e-05	8.00339e-05	7.23226e-08	1.61029e-06	-0.238205	1.23158e-07	9.37697e-07	1.37643
WBGene00000503	cht-1	43.7153	40.6818	44.6005	24.0904	22.5031	26.5274	43.9082	40.988	42.3832	31.1085	33.3151	34.4564	48.9035	46.633	46.1412	43.3263	36.6616	40.3587	34.6016	35.9566	34.3867	42.0629	43.0166	42.2587	41.3607	39.6916	37.5774	cht-1	-0.823288	-0.0200569	-0.383416	0.13504	-0.107386	-0.299162	-0.018705	-0.121822	4.20108e-14	6.97517e-13	0.706969	0.85495	2.0006e-07	2.19762e-06	8.14752e-06	8.13207e-05	0.518456	4.8257e-10	5.65888e-09	-1.3522
WBGene00000506	cic-1	20.6406	20.864	20.2757	24.0646	24.5807	23.2534	20.0796	20.449	20.2806	22.9776	22.6126	22.8947	26.7694	26.1012	25.6946	22.4064	23.4327	22.083	21.7474	21.2662	20.7901	25.1203	26.8971	26.7017	22.6739	22.4861	23.9298	cic-1	0.219075	-0.022582	0.149067	0.347368	0.136515	0.0475402	0.34831	0.160623	1.56194e-05	6.1233e-05	0.603792	0.792118	0.00167381	0.00556771	0.278942	0.419718	0.198302	5.4753e-05	0.000246346	1.33029
WBGene00000507	cit-1.1	48.3566	48.7007	48.8396	46.8799	49.2485	48.4964	48.2447	49.9524	48.7007	46.0551	45.1836	48.0044	49.8754	48.7878	50.1137	48.2993	45.7283	48.7092	50.7676	48.5876	49.9971	49.0218	51.8417	49.9971	49.3902	49.1938	48.4411	cit-1.1	-0.013935	0.00997934	-0.0665101	0.027907	-0.0321844	0.0346954	0.0484435	0.0112894	0.69272	0.756015	0.775228	0.892798	0.0708731	0.134947	0.32712	0.47103	0.0944171	0.0129185	0.0311432	-1.41959
WBGene00000508	cit-1.2	33.5254	36.0732	33.3081	32.4316	32.5536	31.1399	33.1252	39.5724	40.8479	41.2383	40.6986	38.9596	37.1495	41.5744	39.6059	37.8839	40.8063	40.7355	36.1308	39.3993	38.232	39.2004	36.5907	37.7529	39.4495	38.7899	39.043	cit-1.2	-0.0957847	0.135732	0.23323	0.202695	0.219255	0.143761	0.143545	0.191089	0.11699	0.175228	0.0249821	0.122284	0.000366099	0.0014883	0.0188973	0.0515131	-0.030535	0.596258	0.7021	-0.130922
WBGene00000509	cka-1	62.3697	69.9982	63.785	59.354	64.7669	59.2572	63.892	67.271	70.1088	63.6665	67.0744	66.9896	58.606	58.7791	59.0387	65.7252	64.5769	63.0958	65.0058	65.5346	60.3643	59.4471	59.2488	65.8063	65.9952	62.0226	68.6194	cka-1	-0.0961498	0.0385074	0.0149572	-0.149718	-0.018438	-0.0365616	-0.0903059	0.00532428	0.059118	0.0971979	0.429554	0.66661	0.761412	0.835324	0.458862	0.600566	-0.164675	0.00252303	0.00753914	-11.0098
WBGene00000510	cka-2	5.75237	6.34361	7.42447	6.23514	5.72449	6.49496	6.30924	5.82065	5.64502	5.51388	5.87482	6.23514	6.63491	5.90034	5.92667	5.59012	5.94721	5.06177	5.89354	5.2722	4.90082	5.80195	5.41511	6.3057	5.2211	5.98725	5.3276	cka-2	-0.0714472	-0.123854	-0.135376	-0.0710909	-0.230102	-0.268833	-0.153943	-0.230163	0.44662	0.535445	0.190932	0.423814	0.165875	0.265924	0.00929132	0.0286053	0.064285	0.512036	0.626638	-0.474863
WBGene00000511	ckb-1	4.47514	4.79918	5.02507	5.75767	5.50753	5.2211	5.10263	4.54641	4.39285	5.65967	4.71921	5.24425	5.68929	6.43576	5.81416	5.8954	5.05924	4.03691	5.23661	6.08165	4.86373	7.0471	6.54997	6.71918	4.97142	4.69351	4.51513	ckb-1	0.21125	-0.0231588	0.127255	0.331328	0.034858	0.171395	0.51049	-0.00939093	0.0520497	0.0870688	0.829984	0.921841	0.243431	0.359588	0.11308	0.213231	0.204073	0.0591214	0.113417	1.60366
WBGene00000512	ckb-2	33.9577	27.0196	30.2718	174.7	180.495	168.352	31.1085	32.9936	33.6653	38.2785	41.1799	38.797	155.76	176.837	172.127	44.319	48.0337	47.6605	34.7215	35.882	34.8702	88.0022	75.7385	89.4969	40.3176	45.2371	43.7763	ckb-2	2.521	0.099208	0.374342	2.46644	0.620988	0.209604	1.46713	0.503163	1.87378e-25	2.66737e-23	0.196859	0.430857	2.36627e-05	0.000137626	0.00905856	0.0280078	2.0921	1.45644e-23	2.29945e-21	5.58874
WBGene00000514	ckb-4	9.10795	8.18251	8.2861	10.4348	10.1571	10.2443	7.62006	9.1324	9.15485	10.2747	10.5147	11.4842	9.62375	9.8911	10.5797	10.6183	9.15163	9.38636	10.0092	8.8928	9.84265	9.83717	9.02439	9.97756	9.87853	9.45682	9.911	ckb-4	0.269643	0.00936603	0.335976	0.230724	0.177982	0.169304	0.167521	0.19173	0.00111234	0.00293009	0.903073	0.956905	0.000104001	0.000499083	0.032733	0.0806575	-0.105252	0.160135	0.255673	-0.313273
WBGene00000515	ckc-1	26.6801	26.0189	25.0333	10.3163	10.7794	9.9566	26.298	25.8993	28.6355	18.2731	17.7229	17.1057	11.4728	10.1165	10.3616	16.7359	15.801	16.9373	21.797	22.1565	22.2527	12.9981	12.6785	13.0276	20.5229	21.9672	21.2662	ckc-1	-1.32608	0.0528035	-0.55241	-1.28581	-0.653313	-0.232517	-1.00819	-0.286494	1.29607e-19	5.53041e-18	0.252973	0.49794	1.20886e-11	3.56439e-10	3.54859e-05	0.000273904	-0.733398	6.45243e-13	1.25216e-11	1.32764
WBGene00000516	cki-1	7.48993	7.29044	7.23959	6.96946	6.68809	6.67228	6.86551	5.65602	5.30576	7.20659	5.56162	6.99968	6.84428	6.3587	5.20433	6.96688	6.18526	5.83652	5.41918	5.64502	4.70513	5.6634	5.77251	5.98869	5.99158	5.71589	5.78409	cki-1	-0.11389	-0.30861	-0.161901	-0.262236	-0.227023	-0.485798	-0.339957	-0.332662	0.246373	0.328504	0.00403195	0.0392066	0.111762	0.195112	6.4377e-05	0.000450639	-0.100336	0.33692	0.456704	0.619736
WBGene00000517	cki-2	54.0272	52.8628	52.2254	54.0003	56.0145	57.3488	55.3155	51.8223	52.1593	54.6788	53.8185	56.2123	54.6514	55.207	56.6435	53.2726	54.821	52.3771	51.8775	53.5821	49.8584	58.523	60.4654	54.5684	52.9079	54.7867	50.8531	cki-2	0.0709977	0.00135531	0.0502082	0.064644	0.0115824	-0.0360832	0.126754	-0.00557199	0.0862943	0.134979	0.973197	0.988955	0.223829	0.336878	0.37948	0.524376	0.0144359	0.723641	0.806382	0.28752
WBGene00000518	ckk-1	4.34704	3.71284	3.24286	3.68535	3.71284	3.84779	3.5207	3.33316	3.97304	3.65626	3.44958	4.03602	4.07087	4.09664	3.85935	4.0558	4.00637	3.50405	2.92065	3.2457	2.87052	4.13193	3.74713	4.05264	3.5596	3.73262	3.83687	ckk-1	-0.00315061	-0.0649991	-0.0137603	0.0965982	0.0285878	-0.323754	0.0802539	-0.0175064	0.975009	0.982108	0.519435	0.732048	0.893213	0.930138	0.0050144	0.0172021	0.110358	0.285523	0.402164	-8.02007
WBGene00000519	cku-70	65.8508	64.6762	70.4419	85.4934	81.8178	83.6288	71.0739	63.3772	60.1793	66.6476	67.281	68.0653	78.7661	80.0673	81.6953	71.8819	73.912	71.1154	64.3771	69.0845	62.7866	78.2523	81.5006	78.2709	68.5039	65.3948	68.2798	cku-70	0.321483	-0.0471136	0.00834666	0.259365	0.110555	-0.0359952	0.245222	0.00878905	5.6662e-08	3.54102e-07	0.304857	0.552656	0.855634	0.904596	0.433798	0.576947	0.251018	5.42212e-06	3.01042e-05	30.0741
WBGene00000520	cku-80	65.6319	62.5412	60.938	78.6602	75.0371	71.8604	62.1049	64.8637	62.9636	71.2475	67.6309	68.3171	73.3739	74.5066	75.8549	69.3407	73.5365	70.6743	70.0963	68.4613	66.7892	74.4525	74.0558	83.6143	68.6809	69.2639	70.4961	cku-80	0.254879	0.006093	0.131033	0.242078	0.17578	0.119187	0.289875	0.140193	1.21311e-06	5.94808e-06	0.886045	0.949053	0.00431562	0.012714	0.00832953	0.0261826	0.111045	0.0127076	0.0307157	0.847462
WBGene00000521	cky-1	0.249852	0.204483	0.179976	0.129589	0.312325	0.178866	0.212778	0.341222	0.167091	0.412165	0.308848	0.127199	0.314909	0.174276	0.222487	0.312325	0.314909	0.44407	0.26335	0.211465	0.18888	0.342374	0.306282	0.176446	0.253557	0.343787	0.176446	cky-1	-0.143397	0.141072	0.232255	0.128916	0.757385	0.0699164	0.359769	0.247437	0.748723	0.804397	0.741348	0.873473	0.588042	0.696313	0.872557	0.920973	-0.103338	0.807705	0.870079	-0.444935
WBGene00000522	clc-1	14.6476	13.1097	13.8552	13.6475	12.9365	13.0949	14.9117	13.8505	15.067	11.6572	12.3317	12.038	11.0387	10.855	12.1428	10.5947	10.6148	13.0408	14.2758	13.221	13.7099	12.9981	10.7173	12.4829	12.7641	12.5758	12.5115	clc-1	-0.0679441	0.0715227	-0.208432	-0.294695	-0.279554	-0.0130989	-0.209034	-0.137543	0.340083	0.427956	0.302337	0.549906	0.0076755	0.0207307	0.852062	0.908117	-0.0862627	0.262742	0.377829	0.413864
WBGene00000523	clc-2	2.26852	2.52472	2.76616	2.43251	2.10061	2.68883	2.24376	2.68755	2.46692	2.10828	2.20731	1.96025	2.33668	2.72702	2.99919	2.39615	2.78854	3.16076	2.42725	2.84632	2.54266	2.65065	2.39888	2.36419	2.50723	2.26109	2.31936	clc-2	-0.0643455	-0.0273518	-0.26563	0.0893212	0.157182	0.0465116	-0.0185057	-0.0866518	0.609215	0.684876	0.824479	0.91891	0.0544995	0.108892	0.706064	0.805876	0.354951	0.0120688	0.0294009	-1.33626
WBGene00000524	clc-3	3.79048	4.08588	4.24684	2.85265	2.42501	2.72122	4.21718	3.22382	3.20933	3.73931	3.74184	2.831	2.15842	2.61055	2.54409	3.03323	3.41441	3.16076	3.5897	2.48579	3.15256	2.36235	2.62945	2.60803	3.71284	3.10835	2.98751	clc-3	-0.591955	-0.189698	-0.250367	-0.728599	-0.328362	-0.389707	-0.670142	-0.306987	0.000155465	0.000494588	0.131723	0.340906	0.058956	0.11609	0.00555918	0.0187943	-0.478232	0.00240754	0.00723261	1.91013
WBGene00000525	clc-4	0.580219	0.67057	0.479036	0.210348	0.174276	0.178866	0.815982	0.636929	0.525336	0.377175	0.112896	0.28854	0.14382	0.140385	0.163406	0.427577	0.224709	0.270359	0.170646	0.0957236	0.224709	0.0169575	0.0899412	0.221458	0.324738	0.209236	0.211465	clc-4	-1.61009	0.200529	-1.30356	-1.95338	-0.978392	-1.88353	-3.12253	-1.2363	0.00163857	0.00416161	0.499054	0.719174	0.00563803	0.0159628	0.00081807	0.00383466	-0.64982	0.219798	0.32828	0.498498
WBGene00000526	clc-5	3.79048	4.12174	3.69213	3.84531	3.25742	3.38554	3.49318	2.92311	2.79854	3.54869	3.18438	2.7406	4.09664	3.64807	2.96659	3.89668	2.887	3.21686	2.98751	3.62511	2.74853	3.1658	3.71092	3.80292	2.99485	3.60163	3.4384	clc-5	-0.13964	-0.332442	-0.306346	-0.118099	-0.236238	-0.323785	-0.127442	-0.210348	0.278936	0.363685	0.0160669	0.0934475	0.0288855	0.0642443	0.0200595	0.0539445	0.188248	0.176442	0.275887	-0.614493
WBGene00000527	cle-1	87.8708	86.3954	84.9607	64.8009	65.236	64.2997	87.4496	92.105	92.811	86.5281	90.3465	90.0862	73.7085	71.0619	71.0333	90.741	94.8592	91.5345	80.0057	84.1744	84.2734	71.598	73.7724	71.6661	84.2734	85.9413	84.1211	cle-1	-0.41572	0.0702515	0.0423944	-0.264615	0.0965151	-0.0628194	-0.256014	-0.0275119	3.43096e-13	4.88005e-12	0.0327092	0.144288	0.191714	0.298289	0.0578588	0.126697	-0.307009	3.03355e-10	3.67134e-09	-7.24175
WBGene00000528	clh-1	88.5801	94.1366	89.1188	78.8499	80.7682	81.2026	89.8903	91.9194	89.0664	73.5038	73.2873	71.6983	67.7014	67.4974	64.8104	67.8584	68.018	71.0226	77.6758	75.3864	75.6584	66.6036	64.9663	62.1049	77.3942	74.4453	74.23	clh-1	-0.174072	-0.00358854	-0.314192	-0.440835	-0.39145	-0.247165	-0.486342	-0.264794	1.01027e-05	4.11766e-05	0.91122	0.961816	2.84733e-10	6.29932e-09	2.97105e-08	7.46717e-07	-0.126642	0.000944625	0.00316338	0.403073
WBGene00000529	clh-2	2.819	2.87382	2.96144	3.05401	2.89358	3.21686	2.99257	3.56787	3.00825	3.32997	3.21749	3.22069	3.75545	2.58179	3.62511	2.92001	3.29857	3.58123	2.89024	2.84632	3.04727	3.76454	3.01479	2.79578	3.75793	2.99919	2.92188	clh-2	0.0823214	0.143096	0.174966	0.177288	0.186611	0.0222829	0.14554	0.152654	0.535572	0.619555	0.275879	0.524213	0.192822	0.29961	0.868049	0.91828	0.0023219	0.985796	0.991312	0.0132706
WBGene00000530	clh-3	34.4763	32.3724	31.863	29.9201	27.3519	28.7131	32.0314	37.2006	38.1692	37.7046	36.6249	37.2315	33.5403	31.7005	35.7921	36.5845	37.6713	37.4025	36.2099	34.7614	37.5193	35.1544	34.5052	37.6998	34.2624	36.6787	35.378	clh-3	-0.198442	0.114853	0.176059	0.0293515	0.178269	0.135952	0.116543	0.106438	0.0016441	0.00417281	0.044172	0.172973	0.00339513	0.0103227	0.0194283	0.0526138	-0.146707	0.0129871	0.0312739	-0.833286
WBGene00000531	clh-4	2.68494	3.02367	2.60703	3.76066	3.39155	3.43712	2.59059	3.26601	2.97331	3.17352	3.15256	3.38491	4.49307	4.81452	4.67078	2.78785	2.85201	3.06189	2.76305	3.2457	2.9759	3.6155	4.61939	4.09358	2.73936	3.27753	2.72942	clh-4	0.358152	0.0857724	0.232171	0.754918	0.0760215	0.108539	0.567961	0.0760305	0.00256727	0.00622794	0.447954	0.681816	0.0466657	0.0957292	0.341981	0.485744	0.522747	2.4284e-05	0.000118002	2.25155
WBGene00000532	clh-5	108.829	107.392	103.445	105.097	101.135	101.111	103.181	98.1357	101.715	96.6427	90.4084	93.8435	93.7149	91.2757	93.1302	93.3977	91.6095	93.0442	93.7962	92.6672	91.1645	93.6507	98.3477	105.414	96.7313	93.1083	98.5673	clh-5	-0.0560472	-0.0773867	-0.18693	-0.200964	-0.201361	-0.20309	-0.108073	-0.14897	0.125931	0.186655	0.0374167	0.156356	1.68012e-05	0.000102873	4.60698e-06	5.06709e-05	-0.0140343	0.705245	0.792096	0.0750775
WBGene00000533	clh-6	52.9732	57.3118	52.9376	54.8798	54.0488	56.457	53.2726	60.065	57.0797	61.7078	60.9926	61.5457	59.285	61.5664	61.3091	63.2556	61.7669	58.9968	61.4552	62.9636	58.7509	61.8585	61.1979	62.584	56.8049	59.7789	58.1197	clh-6	0.0207803	0.06257	0.177112	0.16042	0.172719	0.167806	0.187244	0.100278	0.619524	0.693654	0.138128	0.350551	0.000181295	0.000808981	0.000314718	0.00169112	-0.0166917	0.686138	0.776955	-0.0942438
WBGene00000534	cpi-2	88.048	89.8203	89.6932	190.303	197.648	195.039	91.1413	81.9853	83.5153	63.3772	66.1189	62.8281	137.446	141.869	140.42	82.0462	80.1422	79.7267	71.5434	73.4033	68.0087	144.551	143.141	128.858	87.3343	86.4483	82.0308	cpi-2	1.12312	-0.0607851	-0.476852	0.649744	-0.145969	-0.329924	0.639379	-0.0647367	1.86117e-22	1.29292e-20	0.154128	0.374213	1.22386e-11	3.60252e-10	1.95452e-08	5.15085e-07	1.1266	1.98473e-21	1.81415e-19	-2.36257
WBGene00000535	cpi-1	110.078	115.822	108.007	242.297	251.374	236.407	118.54	119.641	110.977	79.1546	84.6308	74.7343	154.636	155.567	171.441	88.7259	90.6421	90.1973	121.732	113.434	117.406	165.316	156.412	176.229	131.008	123.369	141.163	cpi-1	1.12963	0.0657681	-0.487864	0.527248	-0.307317	0.0802486	0.574214	0.242949	4.84995e-20	2.20495e-18	0.204994	0.440802	6.6189e-10	1.33819e-08	0.125976	0.23186	1.01511	8.29953e-18	4.00383e-16	-2.08073
WBGene00000536	clk-1	19.638	17.5006	19.4561	19.9362	17.8624	18.3542	19.2878	21.8585	21.314	28.726	25.9372	27.4032	25.7254	26.6959	25.2427	25.2822	25.3061	24.9803	25.0552	24.7687	25.8005	22.0439	23.5928	22.7806	21.7306	23.4008	22.9864	clk-1	-0.00985127	0.138402	0.533839	0.455953	0.415654	0.41705	0.272776	0.265778	0.865184	0.898556	0.0197142	0.106593	1.43104e-10	3.35397e-09	2.58277e-08	6.60604e-07	-0.0778857	0.145967	0.237516	-0.145897
WBGene00000537	clk-2	55.7527	55.2226	52.2254	60.4872	61.6436	55.4638	52.0683	56.4106	58.3165	59.2315	58.523	58.5407	58.3545	63.5101	66.4041	63.3772	59.0387	56.6464	57.0797	58.6511	59.9165	64.1671	64.4987	62.1049	57.943	57.7969	57.2085	clk-2	0.121833	0.0288851	0.111589	0.203596	0.129167	0.105398	0.226456	0.0842464	0.0170903	0.0332669	0.553654	0.756781	0.0289434	0.0643352	0.0371704	0.089249	0.0920075	0.0655868	0.123635	0.824522
WBGene00000539	cln-3.1	5.77598	6.46325	6.10235	5.61999	6.07518	5.94721	7.05757	8.29188	8.14692	3.68836	3.80555	3.49318	4.60396	4.34588	4.48588	6.70522	6.15075	5.28979	5.27466	5.12014	5.75767	6.74728	7.28506	7.39057	5.81112	6.38756	7.35331	cln-3.1	-0.056556	0.357907	-0.7456	-0.448995	-0.0307362	-0.182694	0.224126	0.0889964	0.538363	0.621948	0.000237282	0.00909686	1.46544e-07	1.68211e-06	0.0596531	0.129791	0.296605	0.0125431	0.0303943	-0.397808
WBGene00000540	cln-3.2	13.0865	11.2916	13.0865	14.4555	13.4948	14.2888	12.9846	12.4944	11.7985	14.5728	12.0312	15.6101	16.1852	16.7783	18.0763	13.1854	13.6137	13.4705	14.4489	13.221	12.884	16.2905	15.9557	16.6145	14.2716	13.6378	14.5558	cln-3.2	0.173602	-0.00623606	0.168386	0.44146	0.105182	0.116006	0.381321	0.178988	0.0250229	0.0464188	0.933866	0.971865	0.031215	0.0684052	0.128268	0.234832	0.273074	0.000674747	0.00234086	1.62172
WBGene00000541	cln-3.3	3.8929	3.93589	4.90654	6.6373	5.94721	6.10352	5.28188	5.58637	4.88754	3.58011	3.44958	3.13111	5.21029	5.17491	4.63992	5.66404	5.68644	6.55928	5.18937	4.41039	4.95758	6.0396	6.59122	7.28857	6.84054	6.50173	6.77905	cln-3.3	0.563235	0.315911	-0.321572	0.247579	0.502784	0.204099	0.64184	0.665793	2.52023e-06	1.1619e-05	0.00315533	0.0337637	0.0076816	0.020741	0.0514655	0.115882	0.56915	1.84502e-05	9.18647e-05	-1.7699
WBGene00000542	clp-1	200.745	196.472	194.954	212.585	220.225	219.173	204.567	208.178	202.2	216.801	217.205	214.45	222.848	221.791	223.058	207.327	209.137	216.857	210.119	215.03	211.367	211.114	207.572	207.688	205.76	208.979	209.298	clp-1	0.13799	0.0544593	0.130713	0.17302	0.0973599	0.103686	0.0810028	0.0754551	5.18316e-06	2.23586e-05	0.0354693	0.151271	1.25709e-05	7.96204e-05	0.000242198	0.0013573	0.0423065	0.0969432	0.170423	0.323659
WBGene00000543	clp-2	53.794	56.1077	52.1672	55.5231	52.6656	55.9626	54.2531	56.1379	52.0411	53.6002	52.2656	52.9732	54.6514	51.8999	53.2262	55.4202	53.8076	52.2115	51.5109	52.1235	54.3207	54.641	56.5746	60.7903	49.4354	48.9343	52.1133	clp-2	0.0197163	0.00487753	-0.0279519	-0.0197369	-0.00669707	-0.0367746	0.0827311	-0.106675	0.636161	0.708264	0.906252	0.958869	0.508864	0.628061	0.383044	0.527836	0.00821497	0.846709	0.897565	-0.293897
WBGene00000544	clp-3	3.20207	3.93589	3.17755	4.58203	4.48277	4.93994	4.24684	3.19142	3.56308	4.70844	4.41827	5.00637	5.01582	4.26875	4.54868	3.63405	4.09664	4.28379	4.40671	4.06546	4.23247	3.53362	4.84812	4.80505	3.47774	4.28937	3.2346	clp-3	0.451386	0.0974262	0.468569	0.43255	0.239041	0.316074	0.345736	0.0986182	0.000977934	0.00261329	0.451304	0.684205	0.000736136	0.0027225	0.0173152	0.0479071	-0.0360194	0.760843	0.834664	-0.0768711
WBGene00000545	clp-4	37.7131	39.1315	39.975	67.8089	69.6381	70.4152	37.5237	36.8921	35.8867	39.0163	36.3466	37.1495	57.5343	59.1064	58.3545	39.4706	39.5515	41.4946	43.0435	43.2179	43.852	57.7374	57.6748	55.0783	46.8001	44.319	44.9291	clp-4	0.831288	-0.081145	-0.0540153	0.583969	0.0472601	0.156332	0.547611	0.220395	4.89668e-20	2.22038e-18	0.041668	0.167317	0.172217	0.273816	0.000254829	0.00141574	0.637985	1.94667e-16	7.20847e-15	-11.8112
WBGene00000546	clp-6	7.48993	7.14131	7.73924	10.7717	10.584	10.4186	6.91877	7.32338	8.82325	9.50663	10.2278	10.9376	8.8744	9.66722	7.76506	8.28732	8.28732	8.32531	8.11648	8.24648	9.0502	8.54553	10.0545	8.48379	7.20659	7.08424	6.89182	clp-6	0.505987	0.0296118	0.455345	0.232048	0.154268	0.180305	0.275737	-0.0789597	1.1911e-06	5.84511e-06	0.734527	0.868889	7.89377e-06	5.34677e-05	0.0441981	0.102674	-0.223297	0.010712	0.0265462	-0.49039
WBGene00000547	clp-7	60.4974	59.9639	58.1302	89.141	91.3935	89.7608	60.8447	68.7081	65.0753	70.0086	68.19	69.8699	95.3511	92.9254	97.3419	68.1786	71.5434	74.4525	73.3426	73.1851	73.1076	92.3261	93.6793	89.3966	71.628	73.5566	72.4833	clp-7	0.59736	0.122165	0.220581	0.676533	0.263759	0.298516	0.625656	0.285423	9.2372e-16	2.03441e-14	0.00338991	0.0351688	3.45759e-06	2.62792e-05	1.31149e-08	3.62056e-07	0.455952	6.45293e-13	1.25216e-11	2.06705
WBGene00000548	clr-1	148.362	150.346	146.119	165.55	168.851	163.188	146.81	165.684	168.983	165.008	160.095	162.672	180.405	178.307	192.095	180.315	173.207	164.953	157.878	165.617	161.698	187.994	188.545	203.323	162.39	158.607	164.953	clr-1	0.161795	0.110742	0.133048	0.307184	0.218582	0.124548	0.380224	0.127537	0.000609731	0.00170738	0.0133013	0.082298	0.00383897	0.011509	0.00616503	0.0204173	0.174136	0.000260676	0.00100269	1.30882
WBGene00000549	cls-2	83.4377	83.6624	82.0009	85.5815	77.2163	86.6788	77.1696	96.7963	98.657	96.2735	95.3322	99.2223	91.2878	94.589	89.2276	102.503	102.142	99.7739	99.15	101.858	97.7226	97.968	97.8945	91.9434	105.039	102.642	102.094	cls-2	0.00130114	0.119521	0.223886	0.143525	0.288728	0.261621	0.209494	0.314485	0.981915	0.98703	0.0420702	0.168387	0.000443235	0.00175146	6.5062e-05	0.000454336	-0.0803609	0.162901	0.259051	-0.358936
WBGene00000550	clu-1	323.363	333.815	305.575	269.614	271.159	259.42	309.611	396.585	398.139	482.87	471.616	476.605	346.03	359.712	355.766	383.521	377.082	353.431	453.846	465.992	465.992	377.819	363.617	403.028	373.971	358.813	386.717	clu-1	-0.26572	0.188103	0.57327	0.142018	0.20955	0.526486	0.24775	0.21807	0.000116933	0.000380936	0.00293438	0.0323359	7.97234e-11	1.9618e-09	4.98846e-10	1.98703e-08	-0.431252	2.7835e-08	2.37548e-07	-0.752267
WBGene00000552	cmd-1	301.423	297.714	323.363	346.03	347.24	351.374	321.656	288.232	278.153	284.733	293.472	290.55	300.157	310.467	302.537	282.744	283.142	288.526	280.841	290.88	291.251	293.472	294.824	278.441	295.57	299.818	284.42	cmd-1	0.180011	-0.0558043	-0.085753	-0.0138352	-0.109447	-0.0961261	-0.0884606	-0.06768	4.16943e-05	0.000150229	0.148079	0.364986	0.0316127	0.0691371	0.0166778	0.0463801	0.0719177	0.0693859	0.129272	-0.838662
WBGene00000553	cmk-1	3.2262	3.6129	3.69213	3.38971	3.56435	4.00637	3.11776	2.75204	2.2468	2.99485	2.61055	2.56394	3.51615	3.51615	3.22069	3.85381	3.18233	2.99808	2.48835	2.6424	2.83228	3.40864	2.48962	2.71835	2.5805	2.52533	2.79854	cmk-1	0.0541495	-0.376383	-0.370567	-0.0321346	-0.0881588	-0.405915	-0.297249	-0.412892	0.635077	0.707405	0.0043876	0.0409455	0.00621348	0.0173376	0.00282756	0.0106939	0.338433	0.0123182	0.0299097	-0.913283
WBGene00000554	cnb-1	27.9664	28.9085	28.373	40.4407	42.2976	43.1542	28.5424	27.036	27.0544	30.3545	28.146	28.4633	37.9952	38.2844	36.6027	28.4915	28.2846	28.9437	27.0544	29.4475	28.4064	37.0986	35.9652	35.0666	28.8391	27.408	28.5076	cnb-1	0.561313	-0.0440027	0.0279281	0.406568	0.00912128	-0.00842577	0.344957	-0.00819623	4.59175e-14	7.59475e-13	0.314279	0.561783	0.524717	0.64172	0.846568	0.904597	0.37864	9.30444e-10	1.03665e-08	13.5577
WBGene00000556	cnc-2	0.456068	0.519484	0.615502	13.1538	15.538	14.7302	0.346131	0.842509	1.19437	0.67057	0.594923	0.227103	9.27176	8.92779	9.5031	0.776628	0.567005	0.715287	0.87529	0.785398	0.883744	7.42554	6.25459	6.90261	0.934651	0.879465	0.973362	cnc-2	4.84896	0.404077	-0.27829	4.20392	0.372669	0.710533	3.76655	0.844282	2.19985e-13	3.23222e-12	0.254669	0.499524	0.492028	0.612857	0.0461871	0.106327	4.48221	4.78359e-11	6.64082e-10	-16.1063
WBGene00000557	cnc-3	2.68494	2.48025	2.2583	2.30624	2.76305	2.8391	2.70038	2.40507	2.2468	1.79548	2.53869	2.33839	2.26339	2.61055	2.32367	2.51129	2.10569	2.26581	2.39763	2.05656	2.87052	2.75568	1.79983	2.45068	3.62713	2.99919	2.94995	cnc-3	0.0767788	-0.0127174	-0.164912	-0.0441932	-0.119648	-0.0278446	-0.112492	0.362895	0.599769	0.676552	0.931057	0.970699	0.295466	0.417727	0.852195	0.908126	0.120719	0.448067	0.567562	-0.732019
WBGene00000558	cnc-4	1.9608	1.40723	1.53179	43.6501	48.6053	46.743	1.80196	1.04747	1.04747	1.15628	1.00081	0.753274	10.1171	10.2029	9.16801	1.04526	1.36952	1.18797	1.10134	1.29495	1.24336	5.8333	5.81792	5.05077	1.5475	1.69779	1.32506	cnc-4	4.81282	-0.362897	-0.776707	2.58422	-0.433961	-0.431918	1.77054	-0.100177	1.48375e-21	8.9785e-20	0.0761582	0.244843	0.00208346	0.00674813	0.0425779	0.0998584	3.36093	5.83335e-14	1.39159e-12	-4.32715
WBGene00000560	cnc-6	0.0162814	0.0183952	0.0557608	1.01645	1.40723	1.18946	0.0169575	0.0866407	0.129589	0.108754	0.0169575	0.0661117	1.40626	1.19668	1.4085	0.27634	0.133009	0.123353	0.100926	0.0957236	0.155218	0.67057	0.481012	0.62757	0.154068	0.142487	0.115381	cnc-6	5.65545	1.16676	0.980789	5.82643	2.72038	2.21346	4.61698	2.47941	5.85215e-07	3.04933e-06	0.157137	0.378705	0.243491	0.359614	0.00824925	0.0259632	4.84564	1.48067e-06	9.19044e-06	4.94055
WBGene00000561	cnd-1	0.513777	0.23574	0.615502	0.129589	0.052684	0.178866	0.542482	0.814351	0.567005	0.140385	0.341222	0.315972	0.14382	0.0866407	0.163406	0.427577	0.439527	0.381028	0.59979	0.324738	0.34017	0.125671	0.269248	0.26335	0.684565	0.479036	0.520555	cnd-1	-1.95571	0.556955	-0.762792	-1.73684	-0.0463026	-0.049678	-1.03781	0.368103	0.00204031	0.00506056	0.0977801	0.283592	0.0857222	0.157689	0.891223	0.933132	-0.974047	0.0820362	0.148563	1.27695
WBGene00000562	cng-1	2.42996	2.59266	2.29281	4.90082	4.24262	4.09107	2.70038	2.75204	3.24997	1.40056	2.36688	2.18456	3.56628	4.63992	3.89668	2.19809	2.38744	2.77091	2.79578	2.84632	3.27504	4.60762	4.58555	5.17491	3.90121	3.24764	3.07979	cng-1	0.859781	0.242813	-0.320011	0.721869	0.0187089	0.283082	0.967102	0.47887	9.41712e-07	4.7227e-06	0.105919	0.298618	0.0658627	0.126972	0.0628133	0.135244	1.04188	5.92486e-07	3.9515e-06	-3.25576
WBGene00000563	cng-3	0.112896	0.129589	0.246492	0.129589	0.204483	0.27634	0.0866407	0.176446	0.201717	0.171705	0.084508	0.0661117	0.14382	0.204483	0.133009	0.129589	0.100299	0.178866	0.100926	0.0590172	0.12278	0.0899412	0.165854	0.0957236	0.12278	0.142487	0.176446	cng-3	0.319245	-0.0865273	-0.655806	0.0500755	-0.199483	-0.755771	-0.43518	-0.0739263	0.455752	0.5444	0.84627	0.930003	0.199624	0.30781	0.145337	0.258932	0.705882	0.169395	0.266837	-1.07636
WBGene00000564	cnk-1	80.7513	79.3308	83.1057	89.2124	88.349	85.3016	83.9312	82.2172	81.9498	86.1811	78.6703	82.3706	87.8491	88.0022	86.4104	84.1898	80.9191	83.144	83.7696	83.9859	82.5766	89.2124	87.5373	91.0273	83.5945	80.0901	80.0057	cnk-1	0.112591	0.028988	0.0227241	0.109133	0.0289981	0.0417586	0.137952	0.00269783	0.0017233	0.00434818	0.380954	0.62471	0.496286	0.616571	0.212349	0.343354	0.086409	0.013809	0.0329244	3.80253
WBGene00000565	cnt-1	54.2531	56.9981	53.7803	61.9014	63.2655	64.4711	56.5462	52.697	53.5129	48.7007	53.5129	49.6609	57.4918	57.158	55.058	59.2949	58.7211	59.6427	51.3594	51.4815	53.4858	56.7703	60.344	58.1397	55.6274	57.0358	51.6164	cnt-1	0.200803	-0.0190086	-0.120336	0.0419605	0.107711	-0.0774066	0.0878467	-0.00597661	2.75052e-05	0.000102882	0.644518	0.818466	0.0075092	0.0203446	0.0711824	0.149158	0.162296	0.000583449	0.00206042	-1.3487
WBGene00000566	cnt-2	81.0384	81.2805	80.4511	73.3867	73.1215	78.6803	77.5455	77.9065	79.9842	74.4453	75.3731	75.9819	77.649	78.2172	77.3522	81.0808	76.3191	79.536	77.783	78.7525	77.6984	76.0205	78.7661	76.7723	81.8729	81.3918	78.7882	cnt-2	-0.110099	-0.0448078	-0.104344	-0.0577729	-0.0364152	-0.0518683	-0.068125	-0.00426087	0.00152932	0.003907	0.160098	0.382872	0.00261845	0.00825311	0.108226	0.206227	0.0465713	0.155369	0.249588	-0.446323
WBGene00000567	cnx-1	216.035	203.912	204.487	254.057	253.474	250.239	210.716	218.37	230.229	241.269	240.277	232.066	260.011	256.406	263.705	265.087	263.055	263.413	231.947	229.351	228.02	249.458	252.705	277.307	243.423	242.845	256.128	cnx-1	0.279279	0.0765518	0.191806	0.320797	0.341949	0.142694	0.316321	0.248975	8.05261e-09	5.7813e-08	0.0364336	0.153696	7.01573e-06	4.82459e-05	0.000324021	0.00172987	0.128991	0.00083104	0.00282329	0.672508
WBGene00000583	cof-2	1.6095	2.6262	2.82412	2.24441	2.35137	2.0146	2.35137	2.61438	2.3629	1.98548	2.26852	1.96025	2.10713	2.02485	2.05706	1.73755	2.24855	2.45068	2.12045	2.29653	1.91808	2.26852	2.13118	2.18328	1.77411	2.0471	2.38351	cof-2	-0.038747	0.111009	-0.132776	-0.132827	-0.0698496	-0.104784	-0.043727	-0.141123	0.807252	0.853237	0.469906	0.699528	0.422885	0.548446	0.517038	0.65054	-5.02273e-05	0.999764	0.999879	0.000378285
WBGene00000584	cog-1	1.44118	1.29609	1.29722	1.33338	1.24867	0.94589	1.76935	1.63246	1.30454	1.29495	1.6095	1.46864	1.61495	1.60137	1.4621	1.52847	1.63246	1.72157	1.36123	1.44304	1.35115	1.29897	1.2149	1.53418	1.73471	1.58681	1.24967	cog-1	-0.196837	0.217188	0.110722	0.212511	0.278203	0.0390338	-0.0126948	0.166906	0.239192	0.320379	0.157946	0.379433	0.484002	0.605072	0.804127	0.876878	0.101789	0.512063	0.626638	0.919313
WBGene00000585	cogc-2	85.3485	84.1058	86.1413	93.8911	90.1405	89.2124	82.6551	84.6176	84.1058	88.6899	85.7846	84.6176	85.4934	85.5362	93.0173	87.6267	95.422	85.6104	84.2117	86.1917	83.3306	90.1131	87.6683	96.9982	83.9531	83.826	89.511	cogc-2	0.0967895	-0.0243474	0.0185609	0.0445511	0.0701875	-0.0112595	0.100432	0.00838984	0.0257633	0.0476041	0.56008	0.760664	0.659138	0.754052	0.788067	0.864803	0.0259902	0.538376	0.651113	1.40026
WBGene00000591	coh-1	32.781	32.3187	31.6791	32.1066	30.1033	32.2343	30.5718	32.3045	31.9311	32.3581	30.2867	31.8143	36.6616	37.952	38.1231	33.8131	35.8366	34.7124	30.6439	31.0676	30.6439	35.8366	38.2387	33.6363	35.539	33.4982	35.2166	coh-1	-0.0349464	-0.0305104	-0.035048	0.219436	0.109739	-0.0677834	0.156332	0.106284	0.434774	0.524356	0.491261	0.713747	0.438365	0.56303	0.137491	0.248213	0.254484	3.26524e-06	1.8953e-05	-7.26102
WBGene00000592	coh-3	45.7435	44.2622	43.2707	45.9333	46.504	46.9944	44.7824	43.4381	39.3993	43.3483	40.3848	41.8596	47.9199	48.1996	47.8033	42.4223	43.133	39.4706	42.7595	43.6086	41.6745	45.6218	47.5615	49.2569	41.3607	41.4352	41.6364	coh-3	0.0643499	-0.0626542	-0.0865837	0.11079	-0.095614	-0.0585971	0.0930988	-0.0993265	0.139526	0.203595	0.152449	0.371955	0.0558664	0.111034	0.182945	0.307215	0.197373	9.15451e-05	0.000391785	-2.27957
WBGene00000593	col-2	43.3409	41.4506	38.6266	17.4327	17.6925	16.6916	32.957	25.3061	28.1278	28.0338	29.36	26.716	15.5558	14.9329	15.4138	26.4503	23.7034	25.5094	28.2775	27.5956	29.3888	18.4825	17.599	15.5992	27.3374	28.9137	25.346	col-2	-1.24989	-0.521084	-0.554692	-1.42542	-0.708213	-0.532329	-1.25098	-0.596751	4.65345e-16	1.08624e-14	1.05385e-08	9.40573e-06	5.30464e-09	8.90964e-08	8.95996e-09	2.58915e-07	-0.87073	1.20102e-11	1.87068e-10	1.56975
WBGene00000594	col-3	3.49831	2.59266	3.42424	8.67701	9.29831	9.72569	3.38731	4.54641	3.59914	5.82339	5.35478	5.77598	8.97288	7.44125	7.23364	3.48216	3.91212	4.64792	4.68284	5.30944	5.60303	5.52685	6.31106	4.2881	3.98182	4.64922	3.33845	col-3	1.52779	0.269847	0.831214	1.30158	0.34679	0.701049	0.759813	0.322073	2.98034e-11	3.12746e-10	0.0949066	0.278655	6.05796e-06	4.26373e-05	6.87424e-05	0.000476777	0.470366	0.00076861	0.00262891	0.565878
WBGene00000596	col-7	0.913106	1.14883	1.08565	0.541228	0.45035	0.684565	0.876408	1.81236	1.63609	2.68297	2.809	1.88892	0.865354	1.17923	1.15393	1.44653	1.66024	1.72157	3.08322	2.8015	2.78963	1.737	1.73097	1.57111	1.4346	2.15842	2.0687	col-7	-0.924108	0.395681	1.21164	0.0209761	0.64029	1.48449	0.698574	0.841649	0.007642	0.0164378	0.103005	0.293502	8.77377e-06	5.85378e-05	3.00755e-07	5.35714e-06	-1.19067	1.52728e-05	7.71909e-05	-0.982688
WBGene00000597	col-8	1295.3	1267.43	1240.3	1654.9	1545	1588.38	1267.43	1425.44	1490.29	1275.47	1275.47	1211.65	1781.71	1802.97	1802.97	1150.72	1134.84	1126.94	1394.74	1336.62	1336.62	1802.97	1802.97	1825.64	1336.62	1309.89	1322.7	col-8	0.332608	0.133076	-0.0164104	0.502508	-0.156741	0.0975017	0.514027	0.0616553	3.67673e-10	3.28466e-09	0.000869613	0.0165465	0.654557	0.75065	0.0112392	0.0334461	0.518919	1.16049e-14	3.12469e-13	-31.6214
WBGene00000599	col-10	19.3688	17.7899	19.0622	37.0504	45.0765	44.5651	20.0796	13.082	11.614	17.85	17.6197	18.3125	21.4249	21.9444	22.224	12.6693	14.2201	13.4439	16.659	15.6137	15.4958	15.1192	14.565	13.0735	10.6474	12.3362	10.7485	col-10	1.15733	-0.36025	-0.0632968	0.220459	-0.47594	-0.233091	-0.390342	-0.737402	1.81986e-12	2.32052e-11	0.00339844	0.0352267	0.569409	0.680399	0.0458789	0.1058	0.283756	0.0142117	0.0337779	-4.48294
WBGene00000601	col-12	41.4946	40.5948	46.5608	36.4742	39.6607	38.1603	45.709	39.1769	38.1404	41.5744	44.6806	48.1165	29.4172	29.4387	31.0676	33.928	35.7578	34.116	49.6316	49.3389	50.343	30.9439	32.3665	23.0283	34.7215	38.7899	30.1787	col-12	-0.17044	-0.0643935	0.0653464	-0.514318	-0.305852	0.216932	-0.573191	-0.313819	0.0501144	0.0842452	0.437454	0.673092	0.431788	0.557074	0.0113891	0.033811	-0.579664	3.25479e-07	2.27927e-06	-8.87064
WBGene00000602	col-13	6.99299	5.59844	7.85016	9.1702	10.3654	11.0824	6.89182	5.65602	5.41867	6.66018	7.30146	8.58772	7.29747	6.61071	6.70522	5.7023	5.00708	6.23514	7.57936	7.72342	6.24223	6.42435	6.82331	5.12498	5.53559	6.55433	5.11435	col-13	0.577079	-0.18013	0.148865	0.0193298	-0.262951	0.0787719	-0.139713	-0.244295	3.28392e-05	0.000120702	0.171295	0.398403	0.242426	0.358438	0.531968	0.663842	-0.129536	0.311299	0.429312	-0.870152
WBGene00000603	col-14	56.3786	51.6995	56.9981	53.5129	65.5085	60.7426	57.1702	70.824	71.4299	82.3318	80.3407	83.6143	58.8145	57.3868	57.6836	63.6427	65.021	67.8923	81.738	82.17	84.5081	56.0978	57.9791	44.5605	67.5091	72.2489	61.2812	col-14	0.113756	0.262937	0.577132	0.0748846	0.252968	0.588822	-0.0584414	0.281656	0.162791	0.231833	0.00219335	0.0271358	3.59482e-08	4.94309e-07	2.20729e-08	5.73862e-07	-0.502248	4.5558e-07	3.10764e-06	-0.870247
WBGene00000606	col-17	33.4656	33.5254	34.4612	22.9737	26.1702	28.3689	35.0306	27.3374	26.1466	29.8927	29.9864	30.3875	21.2187	21.6876	20.4619	25.6531	25.6997	23.4201	29.36	29.8163	28.4765	18.2957	18.6985	17.2017	23.8061	25.6531	23.1781	col-17	-0.399616	-0.204922	-0.168061	-0.678175	-0.4447	-0.211266	-0.902202	-0.482446	7.11916e-06	2.98716e-05	0.00692854	0.0550435	0.0257647	0.0584222	0.00598672	0.0199446	-0.510114	3.84154e-07	2.66119e-06	3.03529
WBGene00000608	col-19	1081.89	1081.89	1065.84	840.012	832.761	858.134	1081.89	1150.72	1192.57	1309.89	1267.43	1267.43	1076.99	1081.89	1065.84	1159.64	1184.8	1201.77	1174.83	1184.8	1201.77	1057.46	1093.84	1015.8	1150.72	1143.28	1134.84	col-19	-0.351862	0.0829937	0.251195	-0.00205086	0.13544	0.140899	-0.0277615	0.0864001	3.96483e-13	5.58e-12	0.00488274	0.0439143	4.75675e-10	9.95308e-09	1.65104e-05	0.000145036	-0.253246	4.36911e-10	5.14778e-09	-1.00816
WBGene00000609	col-20	1569.58	1518.5	1518.5	1757.07	1618.16	1781.71	1569.58	1588.38	1569.58	1618.16	1569.58	1588.38	1873.28	1825.64	1721.66	1409.29	1425.44	1490.29	1588.38	1545	1588.38	1852.01	1896.55	1654.9	1588.38	1618.16	1518.5	col-20	0.161853	0.0373234	0.0519381	0.234248	-0.0905321	0.0357426	0.229719	0.0362	0.000214091	0.000661233	0.337383	0.583308	0.188048	0.293849	0.359733	0.504724	0.18231	5.1293e-05	0.000232102	3.51014
WBGene00000610	col-33	0.308848	0.481012	0.378342	1.0822	1.12824	1.43994	0.646365	0.404605	0.34017	0.67057	0.629408	0.476665	1.0212	1.04579	0.841534	0.62757	0.409693	0.507819	0.571235	0.479036	0.698364	0.707884	0.833198	0.669264	0.439527	0.60365	0.454863	col-33	1.66593	0.248916	0.616068	1.35777	0.403861	0.608483	0.961793	0.385677	8.92189e-07	4.49642e-06	0.393278	0.635827	0.0351963	0.0755568	0.0363797	0.0876322	0.741707	0.0039877	0.0112536	1.20394
WBGene00000611	col-34	33.3571	31.33	36.1772	27.4741	30.3027	29.6183	38.0904	30.4803	29.8964	26.1222	28.2846	30.4317	27.3841	25.199	24.9057	26.3694	24.3521	27.043	30.3027	29.2361	31.4645	25.4606	28.4127	21.7809	31.2136	29.7205	26.0683	col-34	-0.208734	-0.0390225	-0.246779	-0.378339	-0.373689	-0.14631	-0.410863	-0.214513	0.0175748	0.0340688	0.631454	0.811071	0.00668192	0.0184432	0.0860462	0.172559	-0.13156	0.145747	0.23738	0.533109
WBGene00000613	col-36	8.97161	9.18391	9.97559	15.5266	14.6141	15.9067	9.43838	10.7688	9.66722	8.69282	9.42471	11.3409	9.65057	9.78522	9.39737	11.1382	9.33197	9.65645	11.3162	10.0342	11.4342	10.7979	10.7855	6.90261	13.7937	10.7676	10.0104	col-36	0.709664	0.0874188	0.0677133	0.0385742	0.0890961	0.223673	0.013694	0.284765	8.29016e-07	4.20243e-06	0.471323	0.700571	0.585694	0.694831	0.0700907	0.147494	-0.0291391	0.815118	0.874485	-0.43033
WBGene00000614	col-37	0.170646	0.0933673	0.12278	0.376178	0.26335	0.513777	0.12126	0.049777	0.0169575	0.108754	0.084508	0.0661117	0.0432314	0.443556	0.100299	0.0176617	0.100299	0.0468966	0.0488441	0.0590172	0.0888273	0.167091	0.052684	0.140385	0.049777	0.084508	0.049777	col-37	1.5347	-1.37521	-0.575808	-0.00321645	-1.45998	-0.98487	-0.246658	-1.06868	0.0113333	0.0232655	0.100966	0.289805	0.4221	0.547715	0.201782	0.330755	0.572591	0.427322	0.548855	-0.994414
WBGene00000615	col-38	31.7372	28.6002	30.4447	44.0676	58.4344	54.0054	31.6833	33.3793	33.582	40.5514	46.633	40.6169	52.0226	54.18	54.9503	32.6371	34.7215	33.9933	39.864	39.185	39.1113	40.2906	41.798	42.9947	26.8001	31.9454	30.9135	col-38	0.769155	0.117837	0.488315	0.827189	0.159511	0.380197	0.459582	-0.0227206	2.66438e-11	2.82321e-10	0.13459	0.345282	4.4053e-07	4.37182e-06	2.30852e-05	0.00018974	0.338874	4.17577e-05	0.000192904	0.693966
WBGene00000616	col-39	302.795	308.124	331.857	223.584	240.277	254.057	324.909	212.98	205.76	223.156	218.546	239.359	155.237	140.42	143.786	178.786	177.892	191.148	242.845	261.392	266.402	153.053	170.208	117.593	200.926	209.637	170.019	col-39	-0.394978	-0.370079	-0.467295	-1.10012	-0.780672	-0.291543	-1.10394	-0.702456	0.00106371	0.00281952	0.00185121	0.0247879	0.000200394	0.000885105	0.0113929	0.0338139	-0.632821	8.40168e-06	4.5146e-05	1.35422
WBGene00000617	col-40	113.851	108.956	124.316	80.0521	85.5815	91.9774	124.903	70.5937	73.2873	63.892	69.469	72.5	48.6564	44.4495	45.8573	63.5366	57.125	63.8341	73.7849	75.6411	80.7598	51.7251	53.4756	36.6446	71.1007	71.1832	53.7566	col-40	-0.432295	-0.414142	-0.750703	-1.31739	-0.910781	-0.591648	-1.2934	-0.831744	0.00245056	0.005969	0.00332069	0.0348673	6.12314e-06	4.30006e-05	0.000113064	0.000721107	-0.56669	0.000708846	0.00244839	0.754879
WBGene00000618	col-41	3.27753	2.99371	2.66549	3.33144	3.27753	3.64807	3.27753	3.56787	3.40989	3.44091	4.24504	4.03602	3.56628	3.11199	3.62511	3.2346	2.72942	4.00836	3.31485	4.44787	4.01243	2.68755	2.95636	2.71835	3.41171	3.66831	3.33845	col-41	0.197777	0.20023	0.390379	0.201359	0.151233	0.377686	-0.0926338	0.223716	0.127279	0.188252	0.119632	0.321605	0.00388676	0.0116301	0.00465947	0.0162264	-0.18902	0.131019	0.217554	-0.484196
WBGene00000620	col-43	80.7513	81.7813	83.3832	38.668	40.1657	43.1154	89.3251	69.1924	66.9294	51.0075	55.4732	52.2254	38.5939	36.9958	36.7597	51.5562	48.0337	52.329	64.7875	63.7008	69.7437	42.7673	42.7851	31.7638	65.8276	65.3355	53.944	col-43	-1.01339	-0.134413	-0.631426	-1.1278	-0.694372	-0.311172	-1.0675	-0.41378	6.58589e-12	7.73377e-11	0.109127	0.303952	6.1728e-08	7.95275e-07	0.000823594	0.00385224	-0.496376	1.53627e-05	7.75515e-05	0.786119
WBGene00000621	col-44	4.91113	3.98013	4.74061	2.28615	2.42501	2.74534	4.55092	4.08871	4.57144	3.44091	3.55644	4.2026	3.2457	2.37327	2.71097	4.09664	3.27637	4.09169	4.54398	5.0448	4.95758	3.0996	3.8066	1.45425	4.86741	4.28937	3.76066	col-44	-0.870059	-0.0477346	-0.277521	-0.715599	-0.25637	0.088271	-0.754916	-0.0833515	7.36177e-05	0.00025069	0.757765	0.8824	0.104241	0.184654	0.565321	0.692769	-0.438078	0.0247808	0.0542415	1.57854
WBGene00000622	col-45	29.2503	29.2247	30.0339	23.2576	24.1507	26.0189	27.9238	25.9556	26.402	18.4281	22.3483	24.5595	25.2427	24.1404	24.8521	23.4651	23.0388	24.0165	25.0283	27.0544	28.1057	27.3218	28.7516	16.2978	29.1475	27.6531	25.1592	col-45	-0.271949	-0.139965	-0.439552	-0.252805	-0.325112	-0.145638	-0.308802	-0.112206	0.0176202	0.0341492	0.193452	0.426951	0.000530316	0.00204349	0.180895	0.304655	0.186747	0.116516	0.197707	-0.424857
WBGene00000623	col-46	0.308848	0.59979	0.652248	0.842509	0.996025	0.719389	0.511421	0.47777	0.59979	0.737968	0.407267	0.698364	0.781823	1.10134	1.24867	0.27634	0.594923	0.715287	0.539892	0.515529	0.698364	0.342374	0.908736	0.513777	0.439527	0.412165	0.423735	col-46	0.789624	0.107395	0.295618	1.0575	0.0675027	0.248152	0.165852	-0.194894	0.0202787	0.0386332	0.758382	0.88294	0.398006	0.523452	0.474455	0.61441	0.761882	0.0212343	0.0476886	2.57726
WBGene00000624	col-47	0.140385	0.129589	0.179976	0.210348	0.312325	0.34017	0.12126	0.146522	0.0899412	0.204483	0.20813	0.127199	0.26335	0.386511	0.192078	0.204483	0.253557	0.270359	0.355563	0.0957236	0.26335	0.377175	0.201717	0.221458	0.289881	0.142487	0.176446	col-47	0.890727	-0.330406	0.224602	0.861823	0.704143	0.522009	0.788302	0.37545	0.050418	0.0846981	0.515111	0.729447	0.636215	0.735824	0.258281	0.397727	0.637221	0.154009	0.247885	2.83711
WBGene00000625	col-48	12.2942	10.6383	11.6707	18.0848	23.3046	22.5299	12.7296	11.0772	10.0364	13.4439	16.8402	15.6917	16.3717	17.6972	16.1821	9.14824	11.5655	11.276	12.7435	13.4948	11.5859	12.8777	11.6892	11.3883	10.1783	10.5719	9.62182	col-48	0.864854	-0.0348505	0.403495	0.536221	-0.109879	0.12367	0.0565095	-0.188669	7.8722e-10	6.66584e-09	0.74026	0.872514	0.000391188	0.00157445	0.239101	0.37545	0.132726	0.172918	0.271377	0.32894
WBGene00000626	col-49	19.2287	15.712	18.0763	29.5885	40.4311	36.2748	18.397	17.3468	18.5875	24.5777	28.2313	29.2556	30.4128	32.3187	33.2045	17.6197	18.8688	18.6175	25.0283	23.4545	23.9189	24.9443	24.5331	21.3931	13.2724	18.8255	14.8295	col-49	0.982602	0.0342111	0.628857	0.852886	0.0585207	0.450985	0.421694	-0.188797	1.00711e-10	9.74404e-10	0.750933	0.87839	1.11883e-06	9.86334e-06	0.000146651	0.000894584	0.224029	0.0229807	0.0509638	0.356248
WBGene00000627	col-50	1.25092	1.0391	0.920663	1.27024	1.35584	1.302	0.815982	0.746402	1.04747	0.980287	1.54945	1.05985	0.973362	1.78631	1.35523	0.893399	0.721714	0.715287	1.458	1.56565	0.951955	1.22698	1.49815	0.62757	0.616643	1.13913	0.766279	col-50	0.292481	-0.31543	0.131748	0.321005	-0.473678	0.281638	0.0256781	-0.381943	0.253664	0.336186	0.266017	0.513081	0.618158	0.721039	0.273204	0.413557	0.189257	0.460507	0.579205	1.4365
WBGene00000628	col-51	3.86163	4.15302	4.74061	3.38971	2.83693	4.00637	3.41875	2.92311	4.08697	3.17352	3.41875	3.44091	3.18438	3.2549	2.85849	3.85381	3.18233	2.61438	3.5897	3.33144	3.8929	3.1658	3.37794	1.85373	3.94012	3.27753	3.55572	col-51	-0.324887	-0.304749	-0.338186	-0.447491	-0.434368	-0.231822	-0.612222	-0.241239	0.0382332	0.0669554	0.0468953	0.179945	0.0353097	0.0757441	0.125956	0.23186	-0.109305	0.506711	0.621779	0.323209
WBGene00000630	col-53	1.28464	1.07489	1.46407	1.1086	1.02177	0.864249	1.04747	1.50016	1.19437	1.15628	1.72966	1.49883	1.32684	1.2246	1.37969	1.15628	1.32981	1.56849	1.57111	1.37257	1.77411	1.01875	1.07489	1.49591	1.58681	1.90751	1.28338	col-53	-0.341783	-0.0393834	0.186549	0.0412611	0.0974825	0.303925	-0.124017	0.311017	0.108184	0.163903	0.837214	0.925875	0.327811	0.452228	0.105367	0.202067	-0.145288	0.446895	0.566513	-0.778819
WBGene00000631	col-54	1.53542	0.884456	0.992178	0.698364	0.594923	0.884456	0.646365	0.59979	0.672945	1.01645	1.32375	1.09046	0.754237	0.414279	0.781823	0.776628	0.913106	0.689154	0.571235	0.746979	1.0519	0.559924	0.654265	0.306282	0.543824	1.04526	0.559924	col-54	-0.642332	-0.806695	0.0215656	-0.849821	-0.50746	-0.561511	-1.16948	-0.701614	0.028339	0.0516923	0.00879648	0.0634226	0.929322	0.954027	0.0478145	0.109305	-0.871387	0.00583809	0.0157806	-40.4064
WBGene00000634	col-58	2.36924	1.93159	2.32726	1.9849	1.99883	2.06303	2.85265	2.5805	1.76428	3.44091	3.91765	3.59593	1.99152	2.02485	2.05706	2.5882	2.81408	2.82535	2.48835	2.60208	2.87052	2.02119	1.91661	2.13595	2.12671	2.46225	1.57443	col-58	-0.132421	0.103387	0.718954	-0.125857	0.31486	0.257625	-0.129259	-0.12342	0.391843	0.481065	0.480424	0.706839	1.265e-05	8.00339e-05	0.0811741	0.164922	-0.844811	2.32364e-06	1.38963e-05	-1.17506
WBGene00000636	col-60	13.0163	10.1026	11.6024	7.45856	9.99083	8.90284	11.5167	11.0772	12.2654	20.3843	18.3705	19.854	9.66722	11.01	9.30044	13.2775	15.2006	14.8069	15.259	17.3607	16.0053	10.3597	10.1196	9.30527	8.82325	12.8485	10.3341	col-60	-0.415594	0.00381431	0.755307	-0.210664	0.322523	0.480708	-0.215863	-0.131043	0.00100565	0.00268075	0.971226	0.988042	2.16696e-08	3.14399e-07	4.62565e-05	0.00034112	-0.965971	4.40237e-10	5.18345e-09	-1.27891
WBGene00000637	col-61	0.641366	0.269248	0.545169	1.44118	1.22091	0.915166	0.781823	0.537469	0.75067	0.951955	0.86597	0.87529	0.781823	0.909788	1.21588	0.814351	0.626464	0.689154	0.902609	0.907391	0.812844	0.596149	1.302	0.547709	0.479036	0.741324	0.314909	col-61	1.33569	0.540655	0.938003	1.013	0.585688	0.901219	0.721866	0.0642553	0.000365308	0.0010775	0.123914	0.328941	0.00905104	0.0238058	0.0116249	0.03437	0.074996	0.78465	0.852008	0.0799528
WBGene00000638	col-62	16.623	15.8109	17.3368	14.4149	15.2231	15.799	18.2756	17.5317	16.3211	23.0927	22.0408	22.4312	11.1323	11.421	12.9757	14.7573	16.6145	17.1731	27.8922	26.4117	24.7943	11.9383	12.5901	11.1412	15.8778	17.7095	18.2644	col-62	-0.134799	0.0674364	0.439879	-0.491502	-0.0316135	0.667694	-0.475723	0.0559832	0.0607279	0.0995057	0.319894	0.567246	2.23588e-07	2.41034e-06	2.55561e-11	1.34495e-09	-0.93138	1.7822e-13	3.87862e-12	-2.11736
WBGene00000639	col-63	20.571	22.3092	21.7306	28.0256	35.5817	32.3784	26.2389	27.8118	28.3843	34.627	38.5689	36.6249	38.1514	39.0348	38.0757	24.2743	28.835	25.7583	36.2099	33.0708	37.1887	28.7761	31.4721	27.1519	22.1541	28.3444	23.2618	col-63	0.560369	0.351978	0.766379	0.837577	0.290239	0.723208	0.440079	0.186804	1.82988e-07	1.04744e-06	0.000212641	0.00850978	3.03134e-10	6.64713e-09	1.00374e-09	3.6932e-08	0.0711972	0.344966	0.465069	0.0929007
WBGene00000640	col-64	0.140385	0.0557608	0.179976	0.160002	0.204483	0.392683	0.178866	0.119023	0.374786	0.140385	0.274186	0.227103	0.28854	0.386511	0.279805	0.392683	0.377175	0.381028	0.0488441	0.174276	0.26335	0.44916	0.374786	0.26335	0.324738	0.209236	0.314909	col-64	1.02628	0.794415	0.868519	1.49046	1.76919	0.150445	1.67337	1.29704	0.0734546	0.117445	0.165004	0.389775	0.132992	0.223631	0.801907	0.875289	0.621945	0.194901	0.298829	0.716098
WBGene00000641	col-65	18.6843	16.0293	17.4662	18.4629	23.8773	24.2214	19.1345	12.8387	13.623	19.0327	17.2304	18.9985	15.6479	16.612	15.6455	13.1854	13.7216	15.368	15.8973	16.8367	18.4139	14.2565	13.5483	11.5702	11.5288	14.1626	11.0595	col-65	0.32962	-0.213633	0.0822015	-0.123148	-0.299778	-0.034483	-0.402114	-0.511412	0.0046111	0.0105148	0.0712743	0.234521	0.467475	0.590704	0.760809	0.8459	-0.205349	0.0831401	0.150171	-2.49812
WBGene00000642	col-66	19.4759	19.9972	20.4213	9.28952	10.2248	10.2075	22.554	8.95774	10.0014	8.69282	8.74719	9.74957	6.55318	6.38972	5.78157	8.48886	8.05822	8.66748	10.0092	13.6641	11.1127	6.83326	7.96828	5.95424	10.5046	10.457	9.1613	col-66	-1.01271	-0.646643	-1.13361	-1.67125	-1.2442	-0.803525	-1.52192	-0.990043	5.72093e-06	2.44779e-05	0.000565497	0.0135275	2.25907e-06	1.81888e-05	7.61392e-05	0.00051896	-0.537642	0.0235244	0.051912	0.474273
WBGene00000644	col-68	1.32637	1.32981	1.37149	0.786693	1.04794	1.07869	1.29959	1.25609	0.869947	1.01645	1.14717	1.18395	1.04747	0.877423	0.841534	1.15628	0.819985	1.27082	0.786693	1.10134	1.28112	1.01875	1.13279	0.708856	0.866587	1.27082	1.18521	col-68	-0.495442	-0.241868	-0.264595	-0.543664	-0.333262	-0.391816	-0.493974	-0.295029	0.025552	0.047254	0.22713	0.469145	0.204262	0.313579	0.0662637	0.140909	-0.279069	0.219822	0.328282	1.0547
WBGene00000645	col-69	0.545169	0.559924	0.722322	1.27024	1.10134	1.35584	0.542482	0.59979	0.484815	0.84371	0.771209	0.842509	1.26738	1.27895	1.63369	0.736668	0.819985	0.84371	0.386511	0.479036	0.768794	0.814351	1.10196	0.953094	0.324738	0.778434	0.876408	col-69	1.03946	-0.155303	0.441063	1.19099	0.413096	-0.22628	0.65415	0.00161991	0.00031818	0.000949495	0.597461	0.787444	0.112008	0.195384	0.454847	0.596896	0.74993	0.00358604	0.01025	1.70028
WBGene00000646	H17B01.2	2.02224	2.39888	2.96144	1.64512	1.82806	1.98548	2.39336	1.50016	1.87428	1.62518	1.75873	2.43714	1.90703	1.53086	1.76998	1.07869	1.4621	1.72157	1.25092	1.10134	1.09529	1.46864	1.302	1.22091	0.973362	1.4621	0.807674	H17B01.2	-0.418855	-0.354197	-0.322669	-0.483048	-0.75668	-1.05728	-0.84702	-1.18772	0.0296779	0.0538125	0.0560343	0.201661	0.089617	0.163416	5.50366e-05	0.000396277	-0.160379	0.421754	0.543489	0.497037
WBGene00000647	col-71	43.7153	36.4125	41.5008	92.2711	119.521	109.533	47.2583	34.8501	34.8175	42.8212	50.7437	46.9782	68.6086	75.6069	70.4961	31.3716	34.9509	36.797	42.5262	41.0447	43.7249	51.9884	52.6468	42.8212	27.6711	37.4641	29.2899	col-71	1.38725	-0.0676027	0.206236	0.818279	-0.232928	0.0669804	0.27955	-0.37412	7.16649e-14	1.13249e-12	0.550791	0.754741	0.0724557	0.137388	0.5519	0.6803	0.612043	2.7768e-06	1.64085e-05	2.96768
WBGene00000648	col-72	0.170646	0.0933673	0.246492	0.179976	0.174276	0.308848	0.12126	0.049777	0.052684	0.140385	0.112896	0.163406	0.175358	0.26335	0.222487	0.0557608	0.0682193	0.0648727	0.100926	0.0957236	0.052684	0.052684	0.0169575	0.0562908	0.0866407	0.115381	0.0162814	col-72	0.404485	-1.20115	-0.203993	0.444736	-1.3236	-0.980326	-2.08534	-1.51475	0.373575	0.462759	0.0486351	0.184139	0.683145	0.773465	0.093538	0.184494	0.648729	0.187803	0.289977	-3.18015
WBGene00000649	col-73	166.112	150.562	169.021	195.643	242.727	225.771	175.414	137.146	134.606	142.237	148.878	144.323	161.638	156.868	152.384	114.153	127.905	125.034	144.097	144.779	150.346	137.02	140.083	103.566	136.916	147.819	117.276	col-73	0.443257	-0.12725	-0.156801	-0.0437925	-0.40191	-0.14451	-0.356516	-0.2774	2.88668e-05	0.00010742	0.17578	0.404287	0.101677	0.181055	0.128022	0.234606	0.113009	0.235682	0.347041	-0.720713
WBGene00000650	col-74	1.67496	1.79058	2.29281	0.298269	0.287354	0.513777	2.21228	1.66905	1.91379	1.43259	1.6095	1.60137	0.728255	0.59979	0.542482	3.03323	2.4286	3.13703	1.64279	1.64162	1.88287	0.742306	0.557617	0.513777	2.73936	1.97511	2.76428	col-74	-2.44362	0.0155104	-0.2954	-1.61505	0.584286	-0.145518	-1.66096	0.37228	1.23099e-07	7.26419e-07	0.92259	0.967316	0.101617	0.181005	0.386837	0.531545	-1.31965	1.46842e-05	7.43935e-05	4.46733
WBGene00000652	col-76	15.2406	15.3638	15.406	12.5135	13.127	13.149	16.498	16.3626	16.1883	7.00087	7.03649	6.45641	10.2995	10.8197	9.91455	6.58185	6.01579	6.46006	10.9541	11.3243	11.0778	12.0539	13.7504	12.2722	11.5288	11.4759	11.0595	col-76	-0.248545	0.0928084	-1.17117	-0.567368	-1.27507	-0.465324	-0.273062	-0.433613	4.43832e-05	0.000158634	0.0669173	0.225529	3.75038e-17	3.02943e-15	1.90292e-09	6.49274e-08	0.603804	5.59399e-10	6.47672e-09	-0.515555
WBGene00000653	col-77	39.3129	32.4212	39.2904	53.5129	72.9864	65.4921	41.51	40.7053	41.0576	59.0551	60.0772	57.749	55.7324	54.0918	55.8802	39.3057	44.0384	41.9975	52.0963	50.5549	53.6251	47.469	46.5682	39.838	31.5453	39.9664	33.1631	col-77	0.773588	0.153012	0.672804	0.57886	0.178537	0.495082	0.273712	-0.0890007	6.77095e-10	5.79838e-09	0.0950691	0.279037	1.50852e-08	2.28808e-07	3.85156e-06	4.35765e-05	-0.0939443	0.260103	0.374748	-0.139631
WBGene00000655	col-79	2.53442	2.32367	2.76616	2.50266	2.5805	2.18712	2.62767	2.65234	2.50531	2.89358	3.8547	3.7027	3.05088	3.11199	3.12599	2.51129	3.14301	2.88906	3.08322	2.72702	3.27504	3.56913	2.13118	2.09289	3.07017	2.70038	2.98751	col-79	-0.0662683	0.032878	0.44655	0.283501	0.168811	0.252691	0.0041604	0.195986	0.657172	0.726209	0.820388	0.916671	0.0030886	0.00950723	0.0823185	0.16678	-0.163049	0.230845	0.341199	-0.36513
WBGene00000656	col-80	1184.8	1211.65	1201.77	595.635	573.828	631.601	1192.57	1119.38	1119.38	1006.36	1006.36	1081.89	518.561	534.837	523.792	898.753	907.777	967.183	1159.64	1150.72	1192.57	658.452	691.462	568.989	1044.51	1010.32	875.119	col-80	-0.998921	-0.068479	-0.21706	-1.18901	-0.374507	-0.0385232	-0.907763	-0.299668	1.87135e-17	5.54604e-16	0.184653	0.415303	0.000215718	0.000943908	0.451714	0.594132	-0.971954	7.26077e-17	2.91428e-15	4.47781
WBGene00000657	col-81	575.714	616.179	631.601	555.545	540.35	570.408	626.84	516.928	515.103	451.195	449.817	479.72	353.009	336.016	338.233	330.181	338.626	351.99	609.641	616.179	631.601	449.817	476.605	396.585	449.817	477.343	417.081	col-81	-0.128527	-0.139677	-0.399057	-0.825936	-0.834026	0.0280199	-0.461921	-0.439617	0.0331453	0.0592216	0.0211534	0.111089	2.0441e-07	2.23423e-06	0.626384	0.742604	-0.426879	1.37662e-07	1.03856e-06	1.06972
WBGene00000658	col-83	0.513777	0.34017	0.447775	0.423735	0.45035	0.240311	0.573975	0.373631	0.299501	0.377175	0.308848	0.315972	0.234285	0.367495	0.59979	0.129589	0.314909	0.628795	0.63562	0.594923	0.663592	0.44916	0.591483	0.62757	0.616643	0.44407	0.386511	col-83	-0.24756	-0.0891179	-0.363968	-0.22358	-0.4499	0.540618	0.341057	0.131215	0.521724	0.606315	0.809036	0.911608	0.368082	0.493552	0.11808	0.22048	0.140388	0.733998	0.814526	-0.385715
WBGene00000659	col-84	0.341222	0.707884	0.722322	0.819985	0.754237	1.0047	0.748237	0.636929	0.567005	0.275204	0.594923	0.439527	0.973362	1.49699	0.689154	0.589691	0.567005	0.537469	0.669264	0.785398	0.847262	1.19002	0.753274	0.589117	0.724271	0.706068	0.454863	col-84	0.627618	0.240357	-0.393015	0.880305	0.0338261	0.463158	0.581389	0.166542	0.0514954	0.0862911	0.461335	0.692482	0.307049	0.429834	0.151989	0.267842	1.27332	0.00181492	0.00564767	-3.23988
WBGene00000660	col-85	9.74957	9.18391	10.0364	4.91971	5.56701	5.66467	10.9264	12.5348	11.8376	9.47748	9.48672	10.5645	6.55318	5.6805	5.3218	11.2235	8.53014	10.5947	14.7023	12.9006	13.7099	8.68925	9.58855	5.98869	14.3531	12.2771	11.3341	col-85	-0.846556	0.280874	0.0295096	-0.721412	0.0517583	0.512258	-0.260054	0.381649	7.63041e-07	3.89986e-06	0.014862	0.0890029	0.798142	0.863473	4.61792e-05	0.000340694	-0.750921	3.29584e-06	1.91051e-05	-25.4467
WBGene00000661	col-86	0.0808829	0.165854	0.0899412	0.298269	0.142487	0.210348	0.151511	0.176446	0.201717	0.140385	0.140385	0.127199	0.405182	0.287354	0.192078	0.350966	0.409693	0.151511	0.100926	0.133009	0.44667	0.377175	0.165854	0.382116	0.439527	0.142487	0.211465	col-86	1.01916	0.744029	0.368516	1.45967	1.39565	0.779168	1.45096	1.18709	0.101444	0.155346	0.232087	0.47425	0.56935	0.680376	0.212108	0.34305	1.09116	0.0676328	0.126606	2.96095
WBGene00000662	col-87	0.140385	0.306282	0.280548	0.210348	0.312325	0.45035	0.0866407	0.306282	0.26335	0.311275	0.274186	0.258512	0.14382	0.287354	0.192078	0.092211	0.133009	0.0648727	0.134253	0.133009	0.18888	0.167091	0.269248	0.423735	0.154068	0.378342	0.282599	col-87	0.432994	-0.264921	0.308933	-0.182425	-1.33821	-0.61503	0.205795	0.1772	0.322427	0.409237	0.578387	0.773394	0.490806	0.611773	0.23839	0.37474	-0.491358	0.29797	0.415651	-1.5905
WBGene00000663	col-88	94.1833	90.7817	95.5204	35.3735	36.6851	45.1242	92.811	49.8754	52.3853	52.5661	50.4332	55.1779	19.6142	24.3309	24.4408	42.5338	42.1654	44.4068	57.1336	57.9481	59.2315	31.5955	33.1079	26.97	48.3262	46.7851	39.043	col-88	-1.27025	-0.578855	-0.824711	-2.04163	-1.11692	-0.685994	-1.60845	-1.06783	4.32386e-10	3.8215e-09	6.61744e-05	0.00497511	6.75992e-07	6.34935e-06	8.29992e-06	8.26992e-05	-1.21692	2.62012e-08	2.25489e-07	1.47557
WBGene00000664	col-89	2.26852	2.06303	2.01582	4.07396	4.29412	4.56193	2.70038	2.5805	3.24997	2.36751	2.43144	2.68013	3.63463	4.24262	3.9396	2.39615	2.6631	2.82535	2.52667	2.72702	2.0618	2.85849	2.66749	2.75568	2.39888	2.52533	2.59266	col-89	1.01908	0.411046	0.237824	0.892619	0.317961	0.193049	0.382031	0.241636	7.01113e-10	5.98634e-09	0.0014869	0.0220145	0.0617339	0.120383	0.123343	0.228174	0.654795	2.81858e-06	1.66215e-05	2.75327
WBGene00000665	col-90	6.3679	5.76026	5.90764	24.3184	31.4645	27.1301	6.76602	7.12029	7.26174	8.43147	9.57243	8.13962	17.6336	21.3281	20.3818	6.62107	6.18526	7.59652	8.77579	10.2876	8.18251	14.3818	15.4592	12.9746	7.07857	8.15319	6.24223	col-90	2.18574	0.226328	0.527658	1.71247	0.17652	0.582748	1.24894	0.244397	3.35324e-17	9.62573e-16	0.0899168	0.26975	0.000264705	0.00112647	6.8669e-05	0.000476458	1.18481	1.60283e-11	2.43965e-10	2.24541
WBGene00000666	col-91	15.2101	12.3758	14.3061	22.1565	27.4741	24.6713	14.0372	11.4816	11.3162	16.944	16.9391	17.4488	17.4488	17.1558	16.8504	11.7841	13.8054	13.1198	15.1869	15.7432	16.5507	15.406	15.4592	13.1246	9.73278	12.3362	10.5113	col-91	0.813979	-0.188234	0.294026	0.29667	-0.109821	0.178336	0.0750103	-0.366635	2.24704e-10	2.06929e-09	0.0548916	0.199144	0.00280325	0.00874042	0.0579423	0.12681	0.00264482	0.976094	0.9858	0.00899519
WBGene00000667	col-92	40.8596	43.133	40.9969	32.8474	35.668	34.8175	45.2442	35.1086	35.9609	27.6959	28.146	28.2313	17.2075	16.999	16.4501	19.9787	22.8836	19.7879	40.0214	39.0678	39.9303	17.9654	18.0208	17.9619	25.5028	27.0033	26.402	col-92	-0.276045	-0.109676	-0.570167	-1.30053	-0.996855	-0.0686212	-1.21009	-0.662156	9.37445e-05	0.000312248	0.0739417	0.240027	1.15198e-09	2.21802e-08	0.257034	0.396229	-0.730364	1.29428e-10	1.68372e-09	1.28097
WBGene00000668	col-93	1071.24	1093.84	1126.94	504.458	515.103	541.948	1126.94	1021.57	996.872	885.455	903.849	894.774	446.713	409.999	412.771	780.997	754.126	764.314	961.017	1093.84	1081.89	606.737	647.346	520.472	885.455	918.988	825.029	col-93	-1.0768	-0.0664797	-0.294032	-1.37497	-0.517763	-0.0734674	-0.893313	-0.324721	9.71939e-18	3.08811e-16	0.216878	0.456309	7.39991e-06	5.06161e-05	0.175387	0.297775	-1.08094	2.17308e-17	9.70176e-16	3.67627
WBGene00000669	col-94	39.9268	43.7153	41.3239	15.3884	14.4231	13.7557	42.3592	35.3265	33.4079	38.4408	36.6669	42.3672	25.5094	25.8561	23.8362	30.4755	30.995	32.756	43.2637	44.9812	41.037	20.6976	22.4781	17.3895	32.0654	30.3347	34.6537	col-94	-1.50926	-0.170706	-0.0853938	-0.726741	-0.401015	0.0503405	-1.03588	-0.364017	3.33639e-16	7.97015e-15	0.0214783	0.111949	0.236888	0.352501	0.471652	0.611876	-0.641348	4.69552e-09	4.61501e-08	7.51047
WBGene00000670	col-95	127.673	117.276	133.862	42.2314	40.6818	48.7664	153.525	112.661	109.387	72.6318	71.1714	80.7936	41.4946	41.7608	40.3477	87.4769	84.4611	85.7846	103.7	116.974	114.594	72.3709	87.297	61.578	88.8367	95.1675	79.0848	col-95	-1.52703	-0.0261563	-0.751907	-1.61173	-0.5545	-0.178775	-0.780076	-0.527447	3.23141e-14	5.50735e-13	0.780008	0.895333	3.09219e-08	4.32036e-07	0.0678593	0.143739	-0.859823	2.73377e-08	2.34109e-07	1.14352
WBGene00000671	col-96	138.674	144.042	163.29	82.2997	87.3447	94.2668	165.117	81.7813	81.3459	67.4685	69.407	72.3918	41.5248	38.0153	37.3874	60.8775	61.2812	67.129	84.9811	84.3628	87.7373	54.641	54.9597	41.8917	76.9675	74.0442	61.2192	col-96	-0.755942	-0.516944	-1.08488	-1.92387	-1.22876	-0.789521	-1.55177	-1.07162	1.56718e-05	6.14002e-05	0.00106551	0.0184863	8.7546e-08	1.07602e-06	8.92312e-06	8.72567e-05	-0.838992	4.76026e-05	0.000217031	0.773352
WBGene00000672	col-97	30.0924	24.5038	26.5579	34.9011	48.0514	43.319	29.4094	18.7435	20.3341	30.1566	29.8305	33.1753	26.6801	27.5286	28.2313	21.4762	23.29	23.2522	27.8248	27.2331	26.5802	23.0692	22.6804	19.9643	18.5951	21.1674	16.8437	col-97	0.617285	-0.267997	0.200921	0.02256	-0.250167	0.0104029	-0.29914	-0.521879	2.90173e-06	1.31716e-05	0.0281961	0.13167	0.0814954	0.15113	0.927126	0.95597	-0.178361	0.122035	0.205168	-0.887717
WBGene00000673	col-98	807.108	804.756	825.029	903.849	898.753	950.313	828.918	701.411	711.133	618.58	644.345	634.696	688.868	631.601	624.891	563.616	555.545	595.635	788.077	775.575	788.077	731.118	798.325	641.757	708.318	713.568	631.601	col-98	0.17514	-0.123856	-0.360625	-0.325784	-0.506422	-0.0510143	-0.168708	-0.248559	0.00384999	0.00895923	0.036175	0.153133	8.64481e-07	7.87237e-06	0.372684	0.517172	0.0348415	0.557131	0.668349	-0.0966141
WBGene00000674	col-99	9.10795	9.66896	9.05533	6.51444	7.07857	6.06161	9.00419	9.95131	8.41998	7.58905	10.094	9.04696	7.2828	6.95174	7.81068	9.67244	9.55832	9.61813	7.67587	8.86771	9.80258	6.74728	6.59122	5.05077	8.45043	8.91461	7.65997	col-99	-0.5017	-0.0217731	-0.064275	-0.337778	0.0537153	-0.0905328	-0.592192	-0.152354	3.96575e-05	0.000143456	0.81792	0.915332	0.511092	0.629933	0.35201	0.496415	-0.273503	0.0120181	0.0293143	4.2552
WBGene00000675	col-101	704.229	719.748	701.411	164.449	152.853	160.955	729.966	832.761	865.917	529.828	522.272	515.103	215.295	197.337	206.758	518.561	502.964	516.928	807.108	804.756	801.894	422.347	455.294	413.706	775.575	778.187	761.271	col-101	-2.15148	0.187792	-0.439592	-1.77965	-0.466272	0.183913	-0.718618	0.123626	4.27852e-28	1.76817e-25	5.41038e-05	0.00462868	2.14637e-11	5.89809e-10	7.45474e-05	0.000510918	-1.34006	1.22981e-22	1.51355e-20	3.04842
WBGene00000676	col-102	0.308848	0.481012	0.513777	0.819985	0.814351	1.22091	0.573975	0.404605	0.709999	0.513777	0.374786	0.567005	0.513777	0.936158	0.542482	0.392683	0.196961	0.507819	0.481012	0.557617	0.513777	0.486198	0.51895	0.62757	0.363901	0.545169	0.520555	col-102	1.15054	0.373855	0.194744	0.621193	-0.306211	0.292725	0.352503	0.160807	0.000672028	0.00186559	0.248612	0.493277	0.56455	0.676756	0.374331	0.518793	0.426449	0.18564	0.287294	2.18979
WBGene00000677	col-103	523.792	513.599	547.912	547.912	553.046	577.487	561.556	388.325	386.227	344.919	376.233	351.374	375.284	349.268	358.813	335.096	329.569	347.734	419.113	417.081	435.081	413.706	427.025	332.775	392.199	404.01	357.878	col-103	0.0818354	-0.266912	-0.56421	-0.5492	-0.645947	-0.318174	-0.43728	-0.458829	0.336394	0.424194	0.00394742	0.0388954	5.22533e-07	5.03598e-06	0.000890824	0.00410915	0.0150097	0.86871	0.914634	-0.0266031
WBGene00000678	col-104	23.4976	19.1739	21.9338	25.5342	32.3265	30.3599	22.8741	20.8917	21.1544	29.068	32.3623	30.1787	24.6454	26.0753	25.0065	20.4167	22.1767	20.3276	24.0165	26.0189	23.996	19.395	21.6876	16.1405	16.5426	21.6524	16.9282	col-104	0.435653	0.00736938	0.502171	0.229577	-0.0377515	0.193767	-0.173548	-0.236963	4.06557e-05	0.000146761	0.937677	0.973849	5.5397e-06	3.96081e-05	0.0445657	0.103367	-0.272594	0.00448114	0.0125038	-0.542832
WBGene00000679	col-105	0.112896	0.0183952	0.0176617	0.049777	0.11646	0.210348	0.0169575	0.0162814	0.0899412	0.0808829	0.0169575	0.0162814	0.175358	0.204483	0.07642	0.0557608	0.196961	0.123353	0.0162814	0.0957236	0.0169575	0.0169575	0.201717	0.140385	0.049777	0.0162814	0.115381	col-105	1.59967	-0.223657	-0.274706	2.05418	1.73719	-0.193692	1.16884	0.397215	0.12775	0.188837	0.844982	0.929531	0.810244	0.872953	0.865526	0.916505	2.32889	0.0331614	0.0697064	-8.47775
WBGene00000680	col-106	1451.39	1425.44	1436.32	996.872	967.183	1010.32	1436.32	1436.32	1545	1240.3	1336.62	1295.3	903.849	862.489	840.012	1211.65	1253.38	1336.62	1490.29	1436.32	1464.47	1166.7	1201.77	1001.94	1425.44	1451.39	1350.56	col-106	-0.536098	0.0328405	-0.156119	-0.726752	-0.181646	0.0260698	-0.357149	-0.0295064	1.64181e-12	2.11053e-11	0.45763	0.689782	0.00148978	0.00503857	0.556361	0.684377	-0.570633	6.44776e-13	1.25216e-11	3.65511
WBGene00000681	col-107	17.7899	15.7458	18.7908	28.8599	41.6364	40.6591	17.8752	12.7612	11.439	17.2373	19.4827	21.8636	27.3841	24.9749	25.3423	14.1506	14.816	15.3336	15.0272	16.031	14.3903	19.554	17.7493	14.5239	11.0029	12.1788	9.68628	col-107	1.05515	-0.331367	0.162473	0.569093	-0.234993	-0.204066	-0.0117285	-0.671566	2.3593e-09	1.84235e-08	0.0256527	0.124097	0.234579	0.34985	0.153952	0.270245	0.40662	0.00354608	0.0101541	2.50269
WBGene00000682	col-108	10.0608	9.06569	9.71625	21.0063	25.8452	24.3213	9.67244	9.83547	9.5603	13.5122	14.0561	14.6154	19.0327	18.9418	17.0166	9.10435	10.8871	10.5947	11.6328	12.1231	13.6305	12.3688	13.7893	11.1412	8.75587	10.3934	7.55893	col-108	1.28674	0.0106174	0.547086	0.927479	0.0875811	0.366444	0.371772	-0.120926	3.36125e-14	5.70624e-13	0.917611	0.964847	4.79701e-06	3.50188e-05	0.000847183	0.00393729	0.380393	0.000170552	0.000684216	0.695308
WBGene00000683	col-109	18.1295	15.9948	18.3125	26.4247	32.8632	32.7041	18.5243	16.2905	16.6187	18.7396	21.5432	22.7963	22.9737	22.8422	22.0097	14.1973	17.0854	17.9304	18.7822	19.1691	20.5838	18.1448	19.0411	13.0735	15.0805	16.6757	12.339	col-109	0.793011	-0.0285987	0.264936	0.370067	-0.0865335	0.156106	-0.0625426	-0.257035	2.33257e-08	1.55032e-07	0.799678	0.907077	0.0224391	0.0519045	0.1671	0.287757	0.105131	0.330797	0.450196	0.396818
WBGene00000684	col-110	9.08052	8.53766	9.57424	3.87219	4.21114	3.73553	9.53703	8.02547	8.1767	7.71652	9.05533	7.0867	4.5523	3.93589	3.89668	7.43256	7.20659	7.59652	9.66896	8.58706	8.70949	3.80135	3.57672	3.6722	8.98764	8.78539	8.66402	col-110	-1.20312	-0.0814213	-0.201059	-1.13527	-0.289583	-0.0093309	-1.29714	-0.0406542	1.25682e-12	1.64982e-11	0.297715	0.546209	0.0182588	0.0434981	0.904174	0.941527	-0.934215	2.52928e-10	3.11753e-09	4.64648
WBGene00000685	col-111	4.94263	4.6418	5.37469	11.305	11.1562	11.9432	5.62245	5.51522	4.83905	5.89837	6.95836	7.14653	10.1658	10.0589	9.70115	5.08245	5.97832	6.55928	5.86353	6.4588	5.86783	7.78712	6.99299	6.81301	4.93868	5.66806	5.24488	col-111	1.19517	0.0967793	0.417542	0.996802	0.24209	0.277352	0.530566	0.0824931	6.17182e-14	9.86071e-13	0.321107	0.568177	0.000119607	0.000564919	0.00648051	0.0213198	0.57926	1.82054e-07	1.33745e-06	1.38731
WBGene00000687	col-113	5.77598	3.98013	4.64131	15.5266	20.0743	18.0331	4.89218	5.36613	5.64502	7.27792	5.76559	7.74752	12.6449	13.2608	13.3135	5.80371	5.59615	6.1416	6.73317	7.0867	7.1168	7.74979	8.05886	7.95108	4.69854	6.13192	5.3276	col-113	1.88775	0.144476	0.530977	1.45087	0.292522	0.543921	0.728675	0.165747	1.48114e-15	3.15619e-14	0.276923	0.525131	0.000248688	0.00106958	0.000167845	0.00100067	0.919889	4.22436e-09	4.18747e-08	1.73245
WBGene00000689	col-115	2.26852	1.67496	2.18328	1.79789	2.70778	2.06303	1.73574	2.40507	1.91379	3.61753	3.62511	3.63034	2.89697	3.30581	2.65478	2.73936	2.18583	2.88906	2.65996	3.16948	3.23293	1.70285	2.73422	2.26278	1.73471	2.22565	1.60826	col-115	0.0688937	-0.0258652	0.831269	0.534597	0.343874	0.554445	0.104085	-0.145279	0.698733	0.761429	0.88532	0.948686	2.00617e-05	0.00011977	0.00229749	0.00899268	-0.296673	0.053969	0.105241	-0.356891
WBGene00000690	col-116	1.01361	0.707884	0.722322	1.01645	1.07869	0.915166	0.815982	0.439527	0.672945	1.08663	0.928906	0.698364	1.90703	1.70285	1.60137	1.56801	0.973362	1.53769	1.04014	1.29495	0.847262	1.3772	1.37149	1.53418	1.63246	1.40365	1.35584	col-116	0.308464	-0.385919	0.12085	1.10557	0.710803	0.362826	0.812317	0.854529	0.189851	0.264025	0.147778	0.364657	0.61787	0.720751	0.122809	0.227405	0.984719	0.000118029	0.000491916	8.1483
WBGene00000691	col-117	13.8356	12.9827	13.6676	35.1163	41.3787	41.2112	14.5703	10.5453	10.126	14.086	12.5845	14.1973	19.8861	20.8579	19.2548	10.3673	10.2851	10.9661	11.9481	12.9456	13.2431	14.5201	15.4592	12.1941	8.08835	9.74445	6.94331	col-117	1.52633	-0.214184	0.0129508	0.56582	-0.35422	-0.0910797	0.0612526	-0.71751	9.45333e-16	2.07555e-14	0.0585793	0.20741	0.904796	0.937733	0.404847	0.550021	0.552869	9.9441e-06	5.25026e-05	42.69
WBGene00000692	col-118	30.1972	27.4659	26.5997	44.4994	46.5845	48.5965	29.4761	27.5459	27.7829	31.0272	34.2067	32.9721	40.2098	40.3697	39.0825	25.199	26.3347	27.4659	32.942	31.4588	32.9203	34.2067	35.3139	29.5712	29.2996	28.6517	27.7969	col-118	0.725219	0.00954703	0.220278	0.505629	-0.0896472	0.208709	0.236492	0.0252497	7.1428e-14	1.12977e-12	0.867677	0.939621	0.000532939	0.00205204	0.000862887	0.00399727	0.285351	1.33071e-05	6.80118e-05	1.29541
WBGene00000693	col-119	1126.94	1104.35	1093.84	1087.4	1093.84	1065.84	1119.38	926.048	935.525	889.321	837.097	795.68	870.728	875.119	875.119	918.988	788.077	801.894	907.777	915.32	926.048	955.744	961.017	911.652	865.917	862.489	894.774	col-119	-0.0343474	-0.16239	-0.401417	-0.343474	-0.41277	-0.274776	-0.233101	-0.342552	0.489281	0.576193	0.00261311	0.0300524	1.00192e-08	1.5676e-07	6.3477e-06	6.62901e-05	0.0579434	0.267433	0.383033	-0.144347
WBGene00000694	col-120	15.5465	12.2412	12.3782	7.58905	10.6957	9.40583	13.4209	13.6609	13.972	24.2785	23.1173	23.074	9.49846	10.5427	8.12491	14.8243	16.0553	15.368	18.0776	20.1863	17.6641	10.8419	11.6608	8.21758	9.97756	12.7435	12.4743	col-120	-0.557221	0.0338412	0.811852	-0.509715	0.207981	0.474665	-0.38228	-0.195248	6.7651e-05	0.000231826	0.754827	0.880691	8.4323e-09	1.34947e-07	7.92117e-05	0.000537371	-1.32157	2.90131e-12	5.02864e-11	-1.62784
WBGene00000695	col-121	2.23362	2.73998	2.21743	0.160002	0.174276	0.178866	1.99474	2.68755	2.32425	1.55997	1.69779	1.82806	0.94589	0.966785	0.948213	2.46813	2.2821	2.64805	1.51896	1.72157	2.02341	0.913106	0.939661	0.547709	2.46934	2.5543	2.27536	col-121	-3.78068	-0.034837	-0.48251	-1.31119	0.0546871	-0.452727	-1.57241	0.0345478	2.22273e-09	1.74119e-08	0.784532	0.898685	0.00241852	0.00769982	0.00317432	0.0117796	-0.828681	9.54465e-05	0.000406678	1.71744
WBGene00000696	col-122	1425.44	1336.62	1360.91	894.774	889.321	903.849	1394.74	1275.47	1295.3	1159.64	1126.94	1166.7	750.453	688.868	695.307	1065.84	1044.51	1093.84	1275.47	1267.43	1309.89	931.046	1006.36	840.012	1360.91	1336.62	1184.8	col-122	-0.617005	-0.0569662	-0.255521	-0.950249	-0.363517	-0.0978952	-0.57095	-0.0890613	1.77984e-13	2.65325e-12	0.223186	0.464346	7.17017e-06	4.91997e-05	0.0422319	0.099221	-0.694728	2.29691e-14	5.86624e-13	2.71887
WBGene00000697	col-123	0.249852	0.204483	0.280548	0.646365	0.699597	0.833198	0.314909	0.146522	0.299501	0.204483	0.308848	0.227103	0.569914	0.729335	0.66043	0.129589	0.253557	0.210348	0.134253	0.28854	0.44667	0.707884	0.481012	0.829635	0.402362	0.209236	0.176446	col-123	1.57715	-0.0337081	-0.0119731	1.43378	-0.337274	0.0474372	1.42183	0.0132714	0.000227039	0.000698492	0.936267	0.972846	0.977814	0.985989	0.909945	0.945053	1.44575	0.001135	0.00372057	-120.75
WBGene00000698	col-124	1873.28	1825.64	1825.64	1166.7	1134.84	1126.94	1852.01	1873.28	1852.01	2037.76	2005.1	1930.72	1464.47	1518.5	1425.44	1781.71	1781.71	1873.28	2210.47	2037.76	2210.47	1569.58	1618.16	1464.47	1873.28	1873.28	1781.71	col-124	-0.687815	0.0136362	0.111781	-0.325612	-0.0228522	0.225076	-0.247637	0.000618224	2.03102e-18	7.19852e-17	0.677529	0.837967	0.00184583	0.00606902	1.3007e-07	2.64821e-06	-0.437393	1.34954e-13	2.98947e-12	-3.91295
WBGene00000699	col-125	65.021	56.0303	65.1455	126.026	165.171	159.091	65.6973	44.1469	44.7899	60.3573	58.3976	63.7008	72.9965	69.4222	68.8043	43.8776	45.0138	47.7006	51.5109	58.4344	57.0643	55.2591	56.0792	44.9942	37.952	45.7435	36.5206	col-125	1.25957	-0.287946	-0.0272527	0.182845	-0.443012	-0.160503	-0.250022	-0.634551	7.13524e-13	9.7573e-12	0.0160838	0.0934829	0.808155	0.871104	0.162065	0.281402	0.210098	0.0672958	0.12609	-7.70925
WBGene00000700	col-126	0.735531	0.559924	0.690435	1.17421	1.15628	1.59382	0.714778	0.781823	0.75067	1.18946	0.771209	0.93904	0.754237	0.936158	1.21588	0.851439	0.539393	0.772963	0.935404	0.907391	1.16429	0.842509	0.721714	0.911899	0.724271	0.778434	0.594923	col-126	0.966201	0.178756	0.525719	0.516478	0.0860145	0.592993	0.301889	0.0741732	0.000113965	0.000372385	0.446679	0.680481	0.0270576	0.0608927	0.0123811	0.0362296	-0.00924048	0.964792	0.97894	-0.0175768
WBGene00000701	col-127	0.816639	0.559924	0.580219	0.594923	0.782896	0.915166	0.479036	0.87529	0.786693	0.609498	0.534617	0.87529	0.482202	0.62757	0.814351	0.62757	0.594923	0.567005	0.819985	0.98921	0.847262	0.559924	0.557617	0.467086	0.760427	0.84371	0.909262	col-127	0.196976	0.0848164	0.0383845	-0.0590343	-0.128435	0.438885	-0.294029	0.367247	0.419504	0.508801	0.729557	0.866458	0.880532	0.921439	0.0702322	0.14772	-0.0974188	0.708122	0.794582	-2.53797
WBGene00000702	col-128	0.700701	0.371314	0.722322	0.94401	1.52738	1.24867	0.479036	0.942246	0.44916	0.814351	1.0391	0.842509	1.34749	1.73029	1.51896	0.427577	0.567005	0.97925	0.87529	0.785398	0.812844	0.876408	1.00664	1.25903	0.684565	0.44407	0.559924	col-128	1.03746	0.0294267	0.612764	1.38128	0.139724	0.504495	0.811879	-0.0704431	0.00121097	0.00316541	0.927106	0.968776	0.0496913	0.100946	0.103861	0.199994	0.768515	0.00473367	0.0131199	1.25418
WBGene00000703	col-129	601.897	620.792	624.891	521.371	508.943	522.272	628.869	616.179	627.854	575.714	577.487	568.989	422.347	399.307	408.734	421.194	431.201	432.304	754.126	731.118	750.453	534.837	571.81	476.605	536.102	565.454	541.948	col-129	-0.250281	0.0200013	-0.100987	-0.586262	-0.523051	0.275795	-0.223274	-0.168543	2.03119e-07	1.15243e-06	0.583694	0.777016	0.0100954	0.0261877	1.97203e-08	5.18914e-07	-0.485275	2.7924e-13	5.79261e-12	4.80532
WBGene00000704	col-130	7.36688	6.46325	6.90631	9.53703	12.907	9.9069	7.0867	5.21746	5.04635	8.8369	7.66331	8.87997	8.75403	7.47671	8.55438	7.55769	7.55769	6.76015	7.25062	7.56967	7.40977	6.11198	6.76389	5.71536	5.0078	5.28979	4.91113	col-130	0.62003	-0.270065	0.289131	0.250189	0.0688532	0.0971024	-0.156077	-0.448559	1.86996e-06	8.85618e-06	0.0272265	0.12884	0.0126711	0.031805	0.386279	0.531149	-0.0389423	0.716274	0.801	-0.134687
WBGene00000705	col-131	0.545169	0.67057	0.513777	1.1086	1.12824	1.02501	0.447775	0.404605	0.567005	0.412165	0.735531	0.87529	1.1227	0.676254	0.973362	0.469577	0.253557	0.567005	0.416662	0.365129	0.34017	0.778434	0.721714	0.467086	0.479036	0.412165	0.520555	col-131	0.926442	-0.289646	0.192529	0.654502	-0.47719	-0.599288	0.196022	-0.283081	0.00104232	0.00276789	0.337968	0.583855	0.496324	0.616571	0.077694	0.159361	0.461973	0.0880208	0.157447	2.3995
WBGene00000706	col-132	0.279805	0.204483	0.212778	0.179976	0.312325	0.151511	0.0866407	0.176446	0.129589	0.049777	0.174276	0.127199	0.12278	0.115381	0.252514	0.236835	0.253557	0.270359	0.231815	0.174276	0.0888273	0.342374	0.165854	0.0957236	0.324738	0.142487	0.115381	col-132	-0.18389	-0.871589	-1.13564	-0.607607	0.136768	-0.570201	-0.348239	-0.397867	0.685455	0.750208	0.0976303	0.283346	0.0520808	0.104856	0.251366	0.389461	0.528034	0.366795	0.487437	-0.464966
WBGene00000707	col-133	522.272	529.828	565.454	326.114	340.051	353.431	565.454	449.817	436.453	403.028	417.746	425.917	229.108	218.903	226.345	340.731	340.731	348.649	489.674	500.319	520.472	264.878	295.743	219.173	400.109	404.837	328.317	col-133	-0.666157	-0.163126	-0.374283	-1.26091	-0.649258	-0.0986015	-1.05685	-0.517756	2.69941e-09	2.09289e-08	0.0394059	0.161292	4.08513e-05	0.000220673	0.202471	0.331603	-0.88663	1.98988e-11	2.96638e-10	2.36887
WBGene00000708	col-135	47.2392	41.3697	41.4078	1.33338	1.67381	1.53086	40.8018	56.9631	57.3488	23.573	27.3429	23.6228	5.90764	6.27343	6.70522	35.0251	31.9808	34.4516	19.6445	19.7281	21.4101	5.39462	5.90222	5.5018	27.1445	23.6177	28.1924	col-135	-4.87778	0.234462	-0.809406	-2.79462	-0.360651	-1.10072	-2.96117	-0.72586	7.59853e-15	1.42509e-13	0.00798412	0.0600261	3.33241e-09	5.85177e-08	1.01189e-11	5.79985e-10	-1.98521	1.47561e-13	3.23981e-12	2.45267
WBGene00000709	col-136	3.8929	3.64021	4.24684	3.73553	5.25576	4.84695	3.96985	2.12492	2.54566	3.61753	2.90919	2.52916	2.3629	2.09289	1.88942	2.26852	2.51784	1.94486	3.51615	3.66496	3.64684	2.33053	2.43144	1.25903	2.02119	2.76305	1.96177	col-136	0.204546	-0.491488	-0.402464	-0.891543	-0.819011	-0.122263	-0.98759	-0.815639	0.214792	0.292871	0.0116326	0.0754382	0.0373427	0.0792631	0.480042	0.619106	-0.489079	0.0281361	0.0605277	1.21521
WBGene00000710	col-137	276.972	284.604	301.423	131.784	134.782	146.263	297.714	233.967	229.456	175.207	186.179	198.81	91.184	86.6945	87.297	160.715	158.215	166.235	233.238	243.135	246.89	120.456	135.911	106.337	212.476	209.137	179.605	col-137	-1.06454	-0.188589	-0.62242	-1.70033	-0.828906	-0.254569	-1.2511	-0.523473	3.6747e-14	6.20199e-13	0.0137871	0.0845186	4.11532e-09	7.07632e-08	0.00150139	0.00633802	-1.07791	1.92551e-13	4.11827e-12	1.7318
WBGene00000711	col-138	25.5496	21.8976	23.78	46.4096	67.6484	60.9239	27.2532	22.1678	23.609	31.5871	31.608	30.6711	45.8153	44.9812	42.122	21.7092	22.4895	21.7306	29.4475	28.8017	29.8494	32.7336	33.827	27.3519	18.1234	24.4581	19.511	col-138	1.26925	0.0312593	0.396603	0.89914	-0.111548	0.306364	0.400023	-0.208445	7.74583e-13	1.05342e-11	0.783304	0.897753	0.00118128	0.00411516	0.00953188	0.0292061	0.502538	3.34693e-05	0.000157952	1.26711
WBGene00000712	col-139	658.452	680.673	675.083	624.891	622.893	620.792	683.65	541.948	545.752	494.341	491.396	497.206	407.677	393.027	385.738	346.03	357.878	371.232	634.696	620.792	636.709	483.454	518.561	417.746	482.87	508.943	440.363	col-139	-0.10758	-0.192067	-0.440771	-0.762655	-0.903784	-0.0893668	-0.505848	-0.493251	0.0870232	0.135911	0.00372837	0.0375801	9.89724e-08	1.19282e-06	0.151758	0.267517	-0.321884	2.97514e-05	0.000142049	0.730276
WBGene00000713	col-140	2037.76	2077.75	2077.75	1436.32	1436.32	1464.47	2113.09	1852.01	1757.07	1757.07	1757.07	1825.64	1569.58	1425.44	1545	1691.14	1691.14	1654.9	1781.71	1802.97	1802.97	1654.9	1691.14	1518.5	1721.66	1691.14	1654.9	col-140	-0.513825	-0.117058	-0.213423	-0.449397	-0.298163	-0.200935	-0.347916	-0.289194	1.22153e-12	1.60471e-11	0.00892934	0.063923	2.32047e-05	0.000135461	4.92544e-05	0.000359111	-0.235973	7.69508e-06	4.17366e-05	1.10566
WBGene00000714	col-141	29.5336	30.7719	33.5118	17.4662	14.5558	16.8437	32.6314	19.912	21.2001	18.9868	19.0132	20.9337	12.3652	10.9766	11.7631	15.1706	13.583	15.282	24.658	27.1103	27.4981	13.8209	16.1056	11.5702	20.9049	18.1996	14.816	col-141	-0.934998	-0.374646	-0.663844	-1.41242	-1.08693	-0.244145	-1.16954	-0.806084	6.54739e-08	4.04945e-07	0.00304866	0.0331327	1.08224e-05	6.99226e-05	0.041888	0.0986264	-0.748581	2.04614e-05	0.000100838	1.12765
WBGene00000715	col-142	306.881	314.008	333.815	165.405	164.7	171.632	348.649	244.679	237.277	211.114	206.408	224.528	116.939	107.744	108.317	168.513	166.235	166.963	268.059	297.01	287.544	154.915	179.605	131.873	209.298	220.08	188.623	col-142	-0.926841	-0.219892	-0.570714	-1.51809	-0.926604	-0.164672	-1.03773	-0.628256	1.00177e-10	9.70857e-10	0.0192946	0.104945	9.28788e-07	8.38807e-06	0.0738502	0.153563	-0.947373	2.97289e-10	3.61556e-09	1.65998
WBGene00000716	col-143	724.89	746.16	775.575	384.656	375.284	406.618	798.325	686.633	639.747	488.311	504.458	505.822	363.617	339.385	340.731	505.822	501.973	500.319	599.948	636.709	622.893	441.594	464.774	389.435	609.641	593.437	522.272	col-143	-0.945406	-0.0842332	-0.583002	-1.10533	-0.574175	-0.273113	-0.79373	-0.382686	1.9621e-15	4.08582e-14	0.151712	0.37073	1.32309e-10	3.12204e-09	6.04609e-05	0.000428756	-0.522332	4.67752e-09	4.59992e-08	0.895935
WBGene00000717	col-144	16.4138	15.213	15.7199	44.9392	53.6437	55.677	15.8954	11.4369	10.6589	18.8688	17.6471	18.8563	24.7293	24.553	23.6963	13.3936	14.0211	13.0763	14.2758	12.9006	14.061	15.9948	17.6567	14.9146	10.2524	11.4013	9.12124	col-144	1.68857	-0.333662	0.225021	0.622475	-0.226817	-0.197767	0.0384799	-0.624732	1.84329e-17	5.4722e-16	0.00366238	0.0370656	0.0311208	0.0682419	0.0680234	0.143998	0.397455	0.000226825	0.000884122	1.7663
WBGene00000718	col-145	14.6205	13.2173	14.9858	30.3545	42.6793	39.7633	15.2902	14.0265	11.9972	19.9362	16.5133	20.1394	20.7775	21.3008	20.8392	12.7296	13.9249	13.8298	15.406	17.843	17.8903	16.1736	16.9926	10.2826	11.4081	14.6141	9.73278	col-145	1.36813	-0.0533864	0.398046	0.553037	-0.0772092	0.246447	0.00919502	-0.275983	3.87449e-11	4.02442e-10	0.718728	0.861378	0.00876145	0.0231493	0.0944586	0.185888	0.15499	0.256364	0.370498	0.389378
WBGene00000719	col-146	81.1543	85.5588	90.806	55.0888	59.1064	63.6878	87.7373	71.8426	76.4505	62.8633	70.5937	75.2775	45.1137	43.319	42.9157	58.8842	57.9282	58.6423	74.2821	83.0671	85.9257	46.1521	53.565	36.2696	68.6194	70.3874	59.8351	col-146	-0.536233	-0.12775	-0.301899	-0.96786	-0.550918	-0.0850228	-0.924299	-0.373223	9.94975e-07	4.96544e-06	0.132854	0.342833	0.00136816	0.0046801	0.312989	0.455935	-0.665961	7.74754e-08	6.12991e-07	2.20591
WBGene00000720	col-147	143.141	153.606	159.295	114.875	126.274	132.184	169.888	136.958	136.295	131.39	131.39	137.347	99.4214	98.3477	99.6115	104.834	105.267	108.574	145.215	168.739	153.525	99.6361	114.489	89.7885	124.214	126.209	115.389	col-147	-0.291074	-0.0455613	-0.186152	-0.614673	-0.514201	0.0329192	-0.585657	-0.316554	0.000298223	0.000895044	0.515797	0.729941	0.0133771	0.0333123	0.637971	0.752591	-0.428521	2.79164e-06	1.64906e-05	2.302
WBGene00000721	col-148	0.431352	0.44667	0.580219	0.160002	0.312325	0.240311	0.447775	0.571235	0.412165	0.545169	0.665602	0.59979	0.28854	0.287354	0.252514	0.312325	0.626464	0.507819	0.699597	0.439527	0.224709	0.44916	0.409693	0.0957236	0.760427	0.636929	0.282599	col-148	-1.05264	-0.0170398	0.318678	-0.771034	-0.0160169	-0.189152	-0.772721	0.105719	0.0415506	0.0719092	0.964691	0.985517	0.395082	0.520348	0.642355	0.756529	-1.08971	0.0224405	0.0499518	-3.41948
WBGene00000722	col-149	34.0012	35.6115	36.8184	153.525	161.962	155.968	36.4313	27.8336	28.4209	23.7148	23.6324	21.9016	112.717	109.785	104.884	15.2171	16.4632	16.4939	39.2004	40.2523	41.1258	84.5887	91.0561	80.0057	23.1332	26.0945	21.6286	col-149	2.14635	-0.205844	-0.620354	1.6214	-1.13706	0.180472	1.26567	-0.587442	2.57166e-24	2.64218e-22	0.00819729	0.0609475	1.34107e-08	2.05563e-07	0.0152846	0.0431202	2.24176	1.12205e-22	1.41208e-20	-3.61368
WBGene00000723	col-150	9.36884	8.99168	9.43712	12.5758	14.2237	13.127	9.00419	10.0633	9.5603	8.88588	9.77455	9.80258	16.7163	14.5164	15.368	6.19184	6.4967	6.52541	13.0328	15.3311	12.3287	13.3736	14.1819	12.8188	7.62266	8.23765	7.55893	col-150	0.516555	0.0400096	0.033579	0.741833	-0.530984	0.538378	0.539885	-0.248247	1.38446e-07	8.11473e-07	0.611568	0.798884	0.676973	0.768431	6.34267e-08	1.43803e-06	0.708254	3.69105e-10	4.39359e-09	21.0922
WBGene00000724	col-151	0.170646	0.129589	0.151511	0.0778796	0.052684	0.0557608	0.248825	0.240311	0.201717	0.140385	0.240311	0.346131	0.092211	0.0557608	0.100299	0.169382	0.133009	0.123353	0.170646	0.211465	0.26335	0.0169575	0.0169575	0.0562908	0.187715	0.142487	0.142487	col-151	-1.28047	0.61314	0.613241	-0.913301	-0.111286	0.482658	-2.56363	0.0548733	0.0173902	0.0337411	0.108296	0.302485	0.113453	0.197172	0.210033	0.340805	-1.52654	0.00233543	0.00704402	-2.4893
WBGene00000725	col-152	0.609498	0.306282	0.784105	0.32204	0.371314	0.599235	0.378342	0.341222	0.44916	0.609498	0.439527	0.629408	0.405182	0.23574	0.279805	0.236835	0.346131	0.663592	0.571235	0.324738	0.590267	0.273059	0.341222	0.589117	0.439527	0.412165	0.48903	col-152	-0.37862	-0.467625	0.0551416	-0.827896	-0.435639	-0.137094	-0.51523	-0.262286	0.295416	0.380826	0.202609	0.438088	0.869227	0.913627	0.690426	0.79416	-0.883037	0.0340508	0.0711307	-16.014
WBGene00000726	col-153	6.60944	7.75886	6.70466	4.77585	4.38311	5.00907	7.92788	7.68482	7.67295	7.20659	8.8744	8.0062	4.13339	5.69968	5.0661	7.13063	8.61028	7.22834	8.0062	7.32338	7.89515	5.24488	4.81452	5.05077	7.82612	7.59724	7.72342	col-153	-0.565567	0.152515	0.196021	-0.50349	0.129768	0.150356	-0.47251	0.143239	6.78488e-06	2.85864e-05	0.098319	0.284822	0.0389729	0.0823121	0.106539	0.203774	-0.699511	1.31122e-07	9.92677e-07	-3.56854
WBGene00000727	col-154	0.545169	0.59979	0.513777	1.13025	1.85854	1.24867	0.748237	0.706068	0.567005	0.609498	1.00081	1.05985	1.20064	1.19668	1.03084	0.511421	0.539393	0.598681	0.87529	0.94589	0.883744	0.778434	1.17673	0.996025	0.479036	0.814351	0.282599	col-154	1.30392	0.289013	0.661551	1.04949	0.00482676	0.704496	0.813467	-0.185822	4.8357e-05	0.000171123	0.329059	0.575563	0.0268591	0.0605165	0.0177165	0.0487612	0.387943	0.120742	0.203527	0.586415
WBGene00000728	col-155	10.9754	11.9624	11.6707	19.9362	21.7608	20.9663	13.387	14.6808	14.5516	19.1285	18.0946	18.0907	21.0915	20.6976	22.2871	14.7573	14.7596	15.2159	20.6166	20.1438	19.3352	18.6915	22.0707	19.1969	15.2159	16.8541	12.8265	col-155	0.856245	0.301191	0.678301	0.889638	0.374352	0.799885	0.794897	0.371896	3.61494e-12	4.40566e-11	0.000572345	0.0136504	1.01495e-09	1.97166e-08	1.94888e-11	1.0544e-09	0.211338	0.00454161	0.0126502	0.311569
WBGene00000729	col-156	4.20388	3.40169	3.62844	1.41462	1.55243	1.65355	4.45767	3.40989	3.85831	6.21441	5.28188	5.91666	1.53086	1.53086	1.12626	3.18438	4.09664	3.71284	5.15541	6.53841	6.20893	1.81817	1.66745	2.2947	2.36419	3.60163	3.58706	col-156	-1.29302	0.0533414	0.629848	-1.43063	-0.0289417	0.655151	-0.989859	-0.261172	4.22259e-07	2.2592e-06	0.703145	0.852581	4.76565e-05	0.000253259	2.44085e-05	0.000198844	-2.06048	8.63851e-11	1.15315e-09	-3.27139
WBGene00000730	col-157	3.27753	2.59266	3.30239	3.35784	4.71921	3.97304	3.79744	3.75545	4.21179	5.25823	4.74808	5.52212	4.8445	4.54281	5.2935	4.28691	3.97304	3.78681	4.60053	6.59015	5.29401	4.8151	4.84812	3.58922	3.37081	4.33344	3.27372	col-157	0.370848	0.3566	0.763804	0.676067	0.387276	0.820515	0.535353	0.25318	0.0187261	0.0359832	0.0227079	0.115617	1.22344e-05	7.77442e-05	3.52179e-06	4.04129e-05	-0.087737	0.503552	0.618691	-0.114869
WBGene00000731	col-158	1.38094	1.29609	1.22806	8.99285	9.56228	9.53297	1.4949	1.53356	1.458	1.08663	0.470739	0.698364	5.08245	6.70116	5.84932	0.776628	0.75067	1.04633	1.39319	2.36751	1.74662	6.96009	7.64307	6.06464	1.25337	2.2947	1.81644	col-158	2.83977	0.20059	-0.874694	2.1639	-0.601065	0.437759	2.40383	0.416277	2.48312e-13	3.60271e-12	0.391291	0.634031	0.00884771	0.0233417	0.0613669	0.132772	3.03859	6.09687e-10	6.98907e-09	-3.47389
WBGene00000732	col-159	456.834	453.846	501.973	237.036	243.423	272.54	496.05	313.526	309.143	292.648	310.96	304.807	144.779	133.215	135.911	252.705	259.42	256.517	336.705	351.374	357.551	160.855	175.815	124.214	285.886	296.811	228.104	col-159	-0.909514	-0.368257	-0.635179	-1.76891	-0.875467	-0.43332	-1.62152	-0.807396	1.12725e-08	7.88759e-08	0.00233988	0.0282199	5.00777e-06	3.63283e-05	0.000540331	0.00268881	-1.13373	7.86791e-10	8.87835e-09	1.7849
WBGene00000733	col-160	815.066	832.761	837.097	474.346	471.616	504.458	845.773	641.757	634.696	675.083	688.868	698.077	345.561	344.919	351.374	593.437	609.641	592.418	663.729	724.89	728.815	389.435	392.199	338.233	583.151	581.049	523.792	col-160	-0.777351	-0.238652	-0.268569	-1.25363	-0.468396	-0.233142	-1.14974	-0.55884	2.43153e-12	3.03582e-11	0.000869866	0.0165465	0.000279377	0.00118081	0.00113271	0.00499917	-0.985059	2.41163e-14	6.13218e-13	3.6678
WBGene00000734	col-161	14.6797	10.8784	13.2541	12.3818	16.6145	14.8184	12.6164	12.7238	12.6981	20.7043	19.66	19.6487	11.5431	11.9147	10.9393	14.1506	13.7216	13.2601	18.1946	16.8367	17.5511	12.9981	11.7905	9.5989	10.1783	12.9757	10.3718	col-161	0.159033	-0.0252143	0.630328	-0.169	0.0841955	0.442841	-0.169156	-0.213972	0.121514	0.180919	0.805297	0.910005	3.71314e-07	3.77332e-06	8.70265e-05	0.000580411	-0.799328	9.8106e-09	9.11614e-08	-1.26811
WBGene00000735	col-162	4.41827	4.04827	4.45767	3.11141	4.05483	3.47774	4.45767	4.34588	4.67078	6.85369	6.5222	6.99968	2.85137	2.91936	3.27372	4.80033	4.64421	4.18401	5.12014	4.97771	5.72086	3.27372	3.07508	2.40223	3.62713	3.60163	3.05154	col-162	-0.298778	0.0565099	0.656703	-0.522683	0.0660544	0.287781	-0.56163	-0.334336	0.00840171	0.0178574	0.568364	0.7666	9.94267e-08	1.19746e-06	0.00552986	0.0187243	-1.17939	9.63732e-12	1.5299e-10	-1.79592
WBGene00000736	col-163	0.196961	0.129589	0.179976	0.236835	0.0866407	0.240311	0.052188	0.049777	0.129589	0.140385	0.140385	0.127199	0.175358	0.0557608	0.133009	0.169382	0.133009	0.123353	0.134253	0.174276	0.18888	0.236835	0.127199	0.221458	0.222487	0.115381	0.314909	col-163	0.0413296	-1.30622	-0.310977	-0.637678	-0.272209	-0.0422693	0.153859	0.25395	0.928593	0.947748	0.0304909	0.138332	0.529451	0.645534	0.927673	0.956465	-0.326701	0.540902	0.653258	1.05056
WBGene00000738	col-165	1.01361	1.37016	1.49699	0.129589	0.052684	0.151511	1.4621	1.36565	1.52738	1.35842	1.45671	0.93904	0.26335	0.0557608	0.192078	2.83414	2.35073	2.56394	1.25092	1.33165	1.09529	0.167091	0.0899412	0.0957236	3.37081	1.58681	2.45463	col-165	-3.72076	0.192662	-0.0641421	-3.25376	1.02473	-0.057091	-3.56844	0.900793	5.41358e-05	0.000189361	0.437143	0.672978	0.808651	0.871585	0.826973	0.89173	-3.18962	4.22542e-05	0.000194908	49.7274
WBGene00000739	col-166	23.0564	19.8692	24.8341	100.644	110.284	111.582	24.828	20.3508	21.7667	26.3694	28.9379	26.3297	70.0963	72.587	67.7936	20.6486	22.0547	21.4699	23.937	28.6929	25.9489	42.2663	43.4381	37.0541	19.1285	22.3902	15.859	col-166	2.24836	-0.0185914	0.268859	1.63667	-0.0737987	0.207017	0.861452	-0.248139	2.06854e-21	1.20552e-19	0.846751	0.930041	0.00773977	0.0208657	0.0352172	0.0853975	1.36782	1.01709e-15	3.23513e-14	5.08748
WBGene00000740	col-167	11.2741	8.36168	10.5263	15.3286	20.6406	18.6812	10.8473	9.05092	9.29177	14.9741	14.5858	13.1353	12.6939	11.9147	13.5533	11.1382	10.1375	11.3162	11.6802	13.7271	13.5122	8.54553	11.1847	8.41121	7.00205	9.92145	6.4395	col-167	0.842053	-0.0462252	0.499686	0.338958	0.113613	0.362117	-0.101369	-0.386979	1.54775e-07	8.99287e-07	0.729962	0.866726	0.000462047	0.00181465	0.00804037	0.0254117	-0.160728	0.196272	0.300481	-0.321658
WBGene00000741	col-168	2.68494	2.6262	3.07979	7.01127	7.99425	8.58337	3.11776	2.89216	2.13686	3.1466	3.28111	4.13193	3.59914	4.42891	4.21585	2.65996	2.57357	2.42391	3.1551	3.2457	3.27504	3.80135	4.05378	2.94346	2.12671	2.76305	1.77937	col-168	1.47497	-0.0460537	0.332512	0.539363	-0.133206	0.206516	0.369329	-0.344647	1.77861e-11	1.93784e-10	0.768669	0.889824	0.0341522	0.0737071	0.180126	0.303565	0.206851	0.151362	0.244395	0.622085
WBGene00000742	col-169	32.7205	29.5392	33.8861	92.4179	103.28	108.473	34.4564	24.3521	23.5488	32.5312	32.761	34.6016	54.7533	49.2874	48.4964	25.4229	24.2701	26.5898	30.2649	35.3607	32.4754	33.7805	36.2178	25.8005	20.1785	24.2064	19.7643	col-169	1.65295	-0.239018	0.0569459	0.663462	-0.331799	0.0224908	-0.00645517	-0.585956	2.2326e-16	5.47648e-15	0.038173	0.158312	0.601592	0.707123	0.835434	0.897717	0.606516	2.54893e-06	1.51496e-05	10.6507
WBGene00000743	col-170	6.73427	6.107	7.05502	20.2249	22.3833	22.4479	7.3865	6.20287	6.69605	9.68628	9.57243	10.0633	16.4501	15.7385	15.5522	5.96287	7.82674	7.26459	8.51315	8.97896	8.39913	9.78695	11.9768	9.40208	6.33993	7.24137	5.78409	col-170	1.69797	0.0249176	0.558959	1.25816	0.0844981	0.376654	0.645093	-0.0427469	2.2068e-17	6.49586e-16	0.807864	0.91127	3.2392e-06	2.48148e-05	0.000623162	0.00304002	0.699203	5.636e-09	5.47736e-08	1.2509
WBGene00000745	col-172	0.786693	0.781823	0.652248	1.60137	1.24867	1.95476	0.842509	0.636929	1.15931	1.04991	1.28237	0.842509	1.17923	1.57916	1.63369	0.973983	0.851439	1.21588	1.19059	0.94589	0.768794	0.814351	1.27358	0.786693	0.684565	0.741324	0.520555	col-172	1.09218	0.19454	0.486138	0.967486	0.452211	0.382911	0.358147	-0.195798	0.000112364	0.000367707	0.463515	0.694442	0.0686279	0.131204	0.149809	0.26498	0.481348	0.0421767	0.0855105	0.990147
WBGene00000746	col-173	1.77533	2.6262	2.35979	2.19445	2.24082	2.29126	2.49316	2.48479	2.02585	3.05401	3.15256	3.7027	2.68013	2.45343	2.71097	2.0085	2.75677	3.13703	2.69481	2.68755	2.28996	2.26852	2.09289	1.85373	1.73471	2.11827	1.96177	col-173	0.023266	0.0824725	0.580829	0.240566	0.257563	0.210826	-0.0810147	-0.187958	0.878916	0.90912	0.582709	0.776544	0.000309615	0.00128916	0.162399	0.281756	-0.340263	0.0193973	0.0441164	-0.585823
WBGene00000747	col-174	1.16041	1.00337	0.920663	1.41462	1.62518	1.65355	1.29959	1.01645	1.19437	1.40056	1.21651	1.31081	1.61495	1.25161	1.63369	1.1191	1.04526	1.12962	1.19059	1.06164	1.49143	1.15628	1.17673	1.22091	0.760427	1.33114	1.43306	col-174	0.598276	0.18059	0.348896	0.532357	0.0952933	0.269335	0.202735	0.140403	0.00327076	0.00773782	0.361474	0.604965	0.0831056	0.153738	0.176675	0.299201	0.183461	0.319825	0.438598	0.525834
WBGene00000748	col-175	15.7432	14.4853	15.5653	28.7516	40.7355	36.9895	16.5805	17.3939	16.3211	20.4637	21.7126	20.2398	30.3545	31.7312	31.3197	14.8778	16.4897	16.0566	19.8569	21.7916	19.5367	23.8459	22.6804	19.6683	12.1397	15.6137	13.7271	col-175	1.1919	0.134723	0.444023	1.02728	0.0521082	0.412937	0.532753	-0.15026	3.49318e-13	4.95638e-12	0.194336	0.428032	0.000118972	0.000562077	0.000264562	0.00146363	0.583257	5.59707e-07	3.74872e-06	1.31357
WBGene00000749	col-176	60.8775	60.1881	66.9163	66.7892	71.7895	76.1307	75.4652	44.0231	43.5073	48.2361	46.7633	51.7824	44.0109	43.2179	40.9255	41.6972	41.7685	44.3899	47.3953	55.0888	51.9103	42.0629	41.3873	31.6696	42.2812	44.095	36.7029	col-176	0.188585	-0.248213	-0.353683	-0.549513	-0.551718	-0.288009	-0.704858	-0.611311	0.112636	0.169702	0.0464369	0.178778	0.00740257	0.0200939	0.0237834	0.0621964	-0.195831	0.138984	0.22853	0.55369
WBGene00000750	col-177	0.760427	0.59979	0.513777	1.0822	1.24867	0.833198	0.876408	0.746402	0.59979	1.04991	0.735531	1.15263	0.834263	0.754237	0.751275	0.62757	0.539393	0.598681	0.757749	0.785398	0.768794	0.525336	0.87529	0.708856	0.580219	0.479036	0.559924	col-177	0.745691	0.249381	0.641163	0.328544	-0.0798497	0.310907	0.152063	-0.204395	0.00180816	0.00454645	0.281736	0.530478	0.00700311	0.0191774	0.182083	0.306091	-0.31262	0.144753	0.236226	-0.487582
WBGene00000751	col-178	1275.47	1253.38	1253.38	935.525	918.988	946.352	1275.47	1166.7	1134.84	1015.8	978.379	986.813	778.187	761.271	757.455	931.046	926.048	880.388	1076.99	1081.89	1111.41	915.32	946.352	931.046	1015.8	991.869	996.872	col-178	-0.433544	-0.0816346	-0.343866	-0.719644	-0.467854	-0.210212	-0.437786	-0.332293	1.09361e-14	2.00769e-13	0.00890138	0.0637749	3.05993e-12	9.84106e-11	8.17908e-08	1.76894e-06	-0.375778	9.13693e-13	1.73233e-11	1.0928
WBGene00000752	col-179	281.526	281.854	292.366	136.733	131.521	140.71	291.251	250.239	249.614	260.392	259.42	262.664	135.802	133.4	129.97	220.371	225.247	221.302	260.011	261.108	263.055	149.227	147.414	128.062	244.057	245.322	227.859	col-179	-1.06489	-0.115877	-0.128636	-1.09927	-0.359091	-0.125764	-1.01004	-0.254909	2.0969e-19	8.73305e-18	0.0152858	0.0906346	0.00828936	0.0221071	0.00936795	0.0287953	-0.970636	3.33524e-18	1.75942e-16	7.54561
WBGene00000753	col-180	56.8455	48.0514	60.6611	121.76	136.875	144.779	60.7644	41.2229	40.3944	51.0075	52.8524	58.1492	59.5602	60.7016	57.0902	39.3057	39.6849	39.975	54.8934	59.2227	55.6865	46.5682	49.2401	31.7638	34.6718	41.1361	31.3069	col-180	1.27981	-0.234613	-0.0262269	0.103616	-0.469889	0.0385023	-0.380137	-0.629083	3.31075e-12	4.05199e-11	0.0641743	0.219522	0.830018	0.886572	0.749403	0.838318	0.129843	0.291652	0.408939	-4.95076
WBGene00000754	col-181	2113.09	2113.09	2210.47	1309.89	1275.47	1309.89	2345.38	2484.5	2624.03	2484.5	2484.5	2113.09	1518.5	1545	1518.5	2210.47	2113.09	2113.09	2484.5	2345.38	2484.5	1930.72	1930.72	1781.71	2731.74	2731.74	2484.5	col-181	-0.724281	0.209678	0.132309	-0.490005	-0.000863777	0.184839	-0.189218	0.303491	5.93661e-15	1.13423e-13	9.10059e-05	0.00572645	0.00814916	0.0218042	0.000415339	0.00214678	-0.622314	1.84443e-13	3.98862e-12	-4.70349
WBGene00000755	col-182	2.51129	1.97387	2.18328	1.60137	2.06512	1.50016	2.06512	2.18995	2.79854	2.53869	2.94346	2.68013	1.8208	1.91853	1.51896	2.26852	2.38744	2.77091	2.15096	3.13042	3.36856	1.85114	1.87698	1.22091	2.09289	2.07901	1.96177	col-182	-0.385459	0.0586154	0.287715	-0.342404	0.160578	0.329395	-0.430829	-0.120543	0.0396527	0.0691415	0.718433	0.861279	0.0813267	0.150881	0.0438846	0.102194	-0.630119	0.00111968	0.00367449	-2.19008
WBGene00000756	col-183	135.231	136.438	142.237	94.2501	96.2088	105.988	143.064	154.636	143.064	128.649	136.376	135.081	126.464	116.737	116.169	129.471	118.641	130.833	153.35	155.822	158.101	138.408	151.77	111.582	150.447	156.759	139.488	col-183	-0.484081	0.090594	-0.0485086	-0.204018	-0.128376	0.174961	-0.048098	0.109157	7.90415e-08	4.81823e-07	0.171953	0.399026	0.46713	0.59044	0.0113601	0.0337538	-0.155509	0.027455	0.0592734	3.2058
WBGene00000757	col-184	978.379	982.961	1001.94	631.601	616.179	650.544	1021.57	1044.51	1093.84	880.388	853.199	865.917	585.054	551.315	559.499	832.761	821.638	849.95	1026.6	1015.8	991.869	716.909	724.89	701.411	1006.36	1015.8	1001.94	col-184	-0.642743	0.0916317	-0.188964	-0.805458	-0.242506	0.034352	-0.466902	0.02945	1.95826e-20	9.55314e-19	0.00118347	0.019612	6.13842e-08	7.91432e-07	0.190057	0.31604	-0.616493	1.1294e-19	7.94104e-18	3.26248
WBGene00000759	col-186	2.39888	1.82559	2.49546	3.66496	3.3194	4.24504	2.21228	1.66905	2.32425	1.95912	1.75873	2.33839	3.2457	3.03857	2.96659	2.26852	1.79	2.02485	1.83169	2.05656	2.09175	3.1658	2.83571	2.45068	1.87428	1.65808	1.74398	col-186	0.735761	-0.130421	-0.145337	0.465552	-0.153538	-0.17095	0.338874	-0.345537	5.8288e-06	2.4872e-05	0.382583	0.626349	0.349233	0.474506	0.265689	0.405325	0.61089	0.000294125	0.00111701	-4.20325
WBGene00000760	col-187	0.0808829	0.23574	0.0557608	0.160002	0.174276	0.12278	0.178866	0.146522	0.201717	0.171705	0.20813	0.0661117	0.234285	0.204483	0.222487	0.092211	0.165854	0.270359	0.0728896	0.439527	0.155218	0.0899412	0.052684	0.140385	0.154068	0.049777	0.084508	col-187	0.601918	0.806979	0.382389	1.15614	0.740397	0.719204	-0.244675	-0.223173	0.333106	0.420793	0.187951	0.420346	0.547571	0.661976	0.242645	0.379778	0.773748	0.184337	0.285659	2.02346
WBGene00000761	coq-1	35.0473	36.7536	34.6953	29.1985	29.4213	30.2649	30.9135	40.5276	38.5939	85.9966	87.7169	82.6684	46.633	46.3427	46.2579	31.2776	31.3666	28.9953	81.5862	75.5046	75.8706	41.3274	38.2097	44.095	37.0986	35.7255	37.7388	coq-1	-0.261063	0.0367164	1.26897	0.388624	-0.219594	1.13277	0.209937	0.0547691	0.000595539	0.00167119	0.574706	0.771382	7.73909e-19	8.78462e-17	1.66769e-17	2.95538e-15	-0.88035	3.57809e-15	1.04263e-13	-0.693749
WBGene00000762	coq-2	26.8704	27.1975	27.0918	29.3118	29.1393	27.2041	24.7345	26.4054	25.1526	26.6458	28.2846	30.9375	34.0605	31.6135	33.2562	27.3702	26.5724	27.6531	28.6636	29.6384	27.7444	31.0224	31.5631	32.4723	25.9421	24.6713	26.0015	coq-2	0.0786858	-0.0891177	0.0821394	0.28462	0.00794302	0.083471	0.226687	-0.0836621	0.111893	0.168699	0.0769918	0.246337	0.100957	0.180105	0.0928213	0.183227	0.202481	0.000206503	0.000811022	2.46509
WBGene00000763	coq-3	19.3064	20.8062	20.6166	20.0977	20.6976	21.7755	18.9309	15.5712	16.431	20.897	19.515	20.5998	23.1332	21.4923	19.5367	20.0595	17.38	19.95	19.6683	19.7281	20.503	20.1325	20.0165	18.4629	19.0025	18.6812	18.0285	coq-3	0.0427809	-0.254851	0.00916041	0.0808853	-0.0837589	-0.0179511	-0.0460822	-0.12191	0.515016	0.600046	0.000706646	0.0150438	0.890526	0.928558	0.786095	0.863457	0.0717249	0.286278	0.402918	7.82988
WBGene00000764	coq-4	15.6101	14.1126	15.2695	15.4119	16.2629	16.3295	13.8356	12.3922	13.0368	15.8778	16.4351	16.3237	17.9229	18.1996	18.8634	14.7573	16.3508	15.2436	15.1869	16.7844	14.0966	17.5846	15.5342	18.037	13.9881	14.2672	14.205	coq-4	0.0897682	-0.199023	0.111366	0.28729	0.0427726	0.026887	0.176826	-0.0847261	0.158619	0.22682	0.00425118	0.0401033	0.0857898	0.157796	0.670884	0.77841	0.175923	0.00762555	0.019855	1.57968
WBGene00000765	coq-5	55.6367	54.8663	56.2123	49.5606	49.3641	49.4354	51.8775	49.3264	50.9815	63.5852	68.7924	65.7525	52.6331	50.9295	51.8162	50.3025	48.2361	47.9116	65.7113	61.8305	66.8979	52.5113	51.402	53.396	48.3262	50.2502	52.0126	coq-5	-0.168442	-0.132207	0.248069	-0.102055	-0.189318	0.222074	-0.0851892	-0.147837	0.000109918	0.000360684	0.0013378	0.0208187	1.9793e-07	2.17561e-06	1.24627e-06	1.72875e-05	-0.350125	2.90422e-10	3.54694e-09	-1.4114
WBGene00000766	coq-6	32.6789	31.7177	34.1845	35.8992	37.963	38.0672	31.9678	30.1102	28.847	31.0118	29.8305	29.4693	36.2748	35.645	36.2178	26.0724	27.6531	26.2542	30.1787	31.0224	31.1238	35.1544	32.5478	33.2954	26.0189	28.079	26.1489	coq-6	0.180992	-0.116148	-0.127489	0.133318	-0.301286	-0.0955525	0.0347145	-0.297115	0.000248433	0.000758666	0.0140109	0.0854677	0.0087568	0.0231405	0.0410505	0.0971022	0.260808	3.15159e-06	1.83424e-05	-2.04572
WBGene00000767	coq-8	91.2757	91.7246	89.2124	77.0253	75.7233	78.095	85.6104	98.1357	99.7739	138.136	133.294	130.466	98.0295	100.051	102.229	91.3292	92.0678	91.5866	147.565	140.52	139.924	100.709	100.414	105.039	97.0657	93.4566	97.7226	coq-8	-0.237863	0.0542943	0.561398	0.141371	0.0148468	0.653648	0.168256	0.0822763	4.01626e-06	1.77167e-05	0.191968	0.425027	2.46819e-14	1.15615e-12	4.23572e-16	5.88494e-14	-0.420026	2.27889e-11	3.36543e-10	-0.74818
WBGene00000768	cor-1	17.4468	17.0551	17.4662	11.4204	11.7768	12.0334	16.1883	17.2168	16.5944	16.0208	15.5441	16.9718	11.3341	10.7388	12.8346	15.8613	15.2866	15.799	17.4923	17.4387	16.8051	12.4575	13.3348	11.2531	15.958	16.1821	14.5993	cor-1	-0.562602	-0.0564027	-0.0975681	-0.581843	-0.1475	-0.00661258	-0.485005	-0.153892	7.60903e-10	6.45875e-09	0.327941	0.574708	0.10503	0.185805	0.908238	0.943722	-0.484275	2.31659e-08	2.01192e-07	4.96345
WBGene00000770	cpb-1	37.4641	38.0439	35.8609	42.7324	44.0441	43.0867	34.6953	40.2523	38.5506	37.6569	40.8063	39.8134	48.5694	43.5457	45.1771	39.975	38.8753	37.9873	39.7787	42.0188	39.2595	43.249	44.4777	46.3505	39.9836	39.9836	37.7641	cpb-1	0.221825	0.0245037	0.0870224	0.301316	0.0676571	0.119227	0.265888	0.0808377	9.78192e-05	0.000324513	0.625052	0.807444	0.0930635	0.168533	0.0227583	0.0600308	0.214293	0.000157193	0.000635764	2.46251
WBGene00000771	cpb-2	5.71483	4.51098	4.9873	6.48395	7.40977	7.05273	4.84986	5.47748	4.67078	5.32559	5.99269	6.16627	5.62122	5.97087	5.78157	5.00525	5.08491	5.71647	4.87245	5.72331	5.82861	5.69213	5.6805	5.71536	4.63375	4.28937	4.79129	cpb-2	0.454357	-0.0207027	0.201209	0.191573	0.059306	0.0990877	0.167885	-0.151837	2.03619e-05	7.79914e-05	0.827452	0.920554	0.0392465	0.082778	0.297231	0.438835	-0.00963547	0.916991	0.94777	-0.0478879
WBGene00000772	cpb-3	209.727	207.688	206.408	233.238	225.488	222.848	207.327	246.506	253.238	247.38	239.577	249.458	256.406	262.064	257.454	238.044	243.423	236.231	243.887	242.297	241.074	260.755	258.464	264.055	228.904	233.238	241.074	cpb-3	0.12806	0.173751	0.239395	0.314768	0.202029	0.221368	0.327916	0.172311	0.00581422	0.0128861	0.000340709	0.0104913	5.43719e-06	3.89392e-05	1.64772e-05	0.000144818	0.0753728	0.0857808	0.154075	0.314847
WBGene00000773	cpf-1	76.7035	76.1797	72.2163	72.0106	75.7233	71.1493	75.3594	71.6442	72.0411	75.1737	74.2821	73.1576	71.1007	69.7908	74.5582	70.7397	73.1851	75.0268	74.0243	72.3814	71.598	71.8426	72.5745	77.5455	73.3057	70.3091	74.3863	cpf-1	-0.0409128	-0.0389264	-0.0160894	-0.0641954	-0.0382538	-0.0453603	-0.0227665	-0.0464886	0.281102	0.365699	0.302083	0.549843	0.670608	0.763301	0.233902	0.369188	-0.048106	0.213707	0.32123	2.98991
WBGene00000774	cpf-2	24.083	26.2883	25.7328	26.4247	25.5907	24.5331	25.3966	18.973	19.1475	19.9064	20.136	19.9787	21.7368	20.9783	22.1217	21.2876	18.5747	21.2662	20.6166	21.6182	19.8739	22.7267	23.9644	21.3252	21.2128	22.0377	20.897	cpf-2	0.0126214	-0.267678	-0.339173	-0.22927	-0.3171	-0.291804	-0.156479	-0.243406	0.857989	0.892471	0.000879905	0.0166509	9.18893e-05	0.000447893	0.000418667	0.00216141	0.109903	0.161489	0.257278	-0.324032
WBGene00000775	cpin-1	11.1097	11.5732	10.9465	6.95285	6.80156	7.52098	11.9542	10.4546	11.3916	9.73792	11.2785	9.61259	6.71341	6.70116	7.62992	8.21979	9.08052	8.3551	11.3579	11.3521	10.0791	7.61206	7.38707	9.05533	10.2524	10.6125	10.9347	cpin-1	-0.664556	0.00591892	-0.141047	-0.683456	-0.390425	-0.0369196	-0.500213	-0.0803721	6.32806e-09	4.61568e-08	0.934441	0.971937	0.0691061	0.131988	0.614815	0.733546	-0.542409	4.06206e-07	2.79832e-06	3.8456
WBGene00000776	cpl-1	1111.41	1143.28	1166.7	764.314	788.077	780.997	1159.64	1451.39	1436.32	811.642	849.95	828.918	547.912	543.603	551.315	1192.57	1104.35	1150.72	1166.7	1166.7	1143.28	801.894	828.918	801.894	1409.29	1394.74	1436.32	cpl-1	-0.552293	0.23435	-0.458028	-1.05827	0.00994277	0.0236334	-0.491525	0.309994	5.53623e-12	6.60355e-11	2.63371e-05	0.00317756	3.68441e-10	7.89964e-09	0.622206	0.739539	-0.600239	2.87705e-12	4.99158e-11	1.31048
WBGene00000777	cpn-1	145.993	142.906	151.374	187.307	190.876	182.022	154.978	149.351	153.421	172.717	164.872	162.89	186.689	188.972	187.922	190.4	193.469	190.119	168.739	168.3	164.101	186.837	193.997	181.576	175.49	178.655	175.207	cpn-1	0.347529	0.0560693	0.184141	0.356367	0.382772	0.18699	0.353858	0.26599	2.35374e-12	2.95111e-11	0.072659	0.237193	1.28811e-06	1.11086e-05	9.28596e-07	1.35858e-05	0.172226	2.99599e-06	1.75582e-05	0.935296
WBGene00000778	cpn-2	4.66523	4.08588	4.18344	3.37129	3.48097	3.47774	3.96985	4.58683	5.2138	3.98416	4.36496	3.5254	3.92401	3.08367	3.07979	4.45391	4.3779	4.60991	4.37655	3.79568	4.04827	3.47445	3.52341	3.48944	3.94012	5.11824	4.55917	cpn-2	-0.327285	0.0738061	-0.136039	-0.36745	0.0552695	-0.0798945	-0.303612	0.0658379	0.00786031	0.0168531	0.488162	0.711738	0.234024	0.349227	0.470983	0.611328	-0.231411	0.0614609	0.117178	1.70107
WBGene00000779	cpn-3	322.66	320.707	342.558	331.391	346.673	347.734	339.385	311.992	277.706	229.108	256.128	235.493	253.474	260.755	273.248	238.773	242.297	238.538	265.947	263.705	276.615	275.09	271.325	247.715	252.705	256.128	250.749	cpn-3	0.0566684	-0.0881085	-0.453276	-0.324839	-0.453556	-0.289894	-0.311067	-0.375601	0.246823	0.328934	0.0778017	0.247996	6.42397e-10	1.30486e-08	2.16618e-06	2.71038e-05	0.128437	0.0169785	0.0393294	-0.283353
WBGene00000780	cpn-4	53.38	54.1711	55.8316	56.368	61.9107	57.6161	54.0918	42.3832	37.5474	39.5073	39.4187	38.6012	42.1152	39.6272	42.8712	37.7976	38.1096	37.0021	42.4867	39.2413	42.2439	40.6717	39.276	38.4713	42.9561	42.5338	40.058	cpn-4	0.104341	-0.297025	-0.474869	-0.39188	-0.532817	-0.396437	-0.462284	-0.379547	0.129212	0.190623	0.000184295	0.00784471	3.51926e-07	3.60584e-06	4.91639e-06	5.32313e-05	0.0829891	0.273335	0.389163	-0.174762
WBGene00000781	cpr-1	716.909	691.462	686.633	4273.71	4273.71	4273.71	795.68	807.108	815.066	82.9979	95.5647	89.9852	1691.14	1588.38	1691.14	123.287	122.594	118.917	259.42	243.553	254.057	2484.5	2484.5	2345.38	400.983	346.673	383.521	cpr-1	2.61326	0.206426	-2.96564	1.24531	-2.52252	-1.4681	1.80402	-0.892163	5.3927e-34	1.8731e-30	7.53003e-06	0.00139121	2.57119e-31	8.93079e-28	9.87967e-25	9.53223e-22	4.21095	1.28078e-35	2.22433e-31	-1.41991
WBGene00000782	cpr-2	0.140385	0.165854	0.12278	0.179976	0.174276	0.210348	0.178866	0.0866407	0.201717	0.0808829	0.274186	0.127199	0.0432314	0.0866407	0.100299	0.204483	0.314909	0.123353	0.26335	0.133009	0.18888	0.167091	0.0899412	0.176446	0.0866407	0.084508	0.084508	cpr-2	0.405888	0.0345029	-0.00829262	-0.989279	0.481387	0.434253	-0.0528312	-0.738812	0.370974	0.460193	0.941117	0.975432	0.986232	0.991595	0.339578	0.483318	-0.980986	0.0889862	0.158961	118.296
WBGene00000783	cpr-3	8.66635	7.86794	7.6516	261.108	258.464	263.413	8.68925	7.9633	7.21615	18.1815	19.66	19.854	142.821	150.128	142.906	28.044	28.702	29.3406	12.6484	13.8002	12.0334	157.757	157.308	162.521	10.9347	12.2985	11.3341	cpr-3	5.01159	-0.0192439	1.25236	4.16676	1.83007	0.664045	4.29796	0.512824	4.92544e-33	1.222e-29	0.806169	0.910498	6.694e-17	5.07663e-15	5.808e-10	2.28725e-08	2.9144	3.56759e-30	4.42559e-27	2.32713
WBGene00000784	cpr-4	276.615	268.396	281.106	677.914	711.133	686.633	275.758	211.787	209.887	60.4654	69.706	65.8617	314.587	306.564	313.526	140.789	146.707	142.088	98.4173	105.178	103.445	381.302	386.717	369.793	116.057	113.791	115.012	cpr-4	1.32819	-0.254475	-2.07694	0.177814	-0.943113	-1.42948	0.462252	-1.26026	1.0511e-20	5.38482e-19	0.000133878	0.00677859	5.546e-23	1.3959e-20	1.27663e-19	3.16732e-17	2.25476	5.59133e-24	9.80855e-22	-1.08561
WBGene00000785	cpr-5	203.756	222.382	227.859	19.6175	23.3613	21.5154	206.758	147.195	149.865	432.304	444.243	456.834	95.5863	91.0052	92.6957	516.928	485.15	498.63	335.096	347.734	339.385	26.6305	27.8336	24.1928	314.865	312.959	301.423	cpr-5	-3.34779	-0.390072	1.03042	-1.2253	1.19945	0.646205	-3.05052	0.509191	4.63942e-23	3.67912e-21	7.01495e-06	0.00133878	2.37272e-15	1.34664e-13	2.17566e-10	9.2824e-09	-2.25572	3.97378e-23	5.52101e-21	-2.18913
WBGene00000786	cpr-6	698.077	724.89	698.077	289.617	306.723	291.066	708.318	778.187	780.997	202.906	222.14	203.524	138.033	146.459	141.021	263.413	254.057	263.705	404.01	404.01	394.361	287.215	284.862	284.604	529.828	515.103	533.041	cpr-6	-1.25774	0.0949053	-1.7562	-2.31758	-1.44111	-0.818466	-1.30758	-0.426461	3.37182e-25	4.43624e-23	0.005871	0.0493761	1.17357e-28	1.45581e-25	1.87539e-20	5.25321e-18	-0.56138	3.66301e-14	9.06204e-13	0.319656
WBGene00000787	cps-6	37.6219	40.5681	42.1575	41.7685	39.0776	40.4948	41.9471	35.1658	33.0026	52.8858	48.5532	48.2835	40.2282	41.4352	40.9255	38.562	40.717	37.7458	44.2557	46.8382	45.5974	38.6786	38.2983	40.0878	36.5876	37.2484	39.3924	cps-6	0.0156726	-0.129493	0.315707	0.0295103	-0.0384163	0.184857	-0.0388584	-0.0861486	0.790944	0.839064	0.0368532	0.154709	6.77512e-06	4.68966e-05	0.00332569	0.0122631	-0.286197	2.99213e-05	0.000142681	-0.906526
WBGene00000788	cpz-1	412.771	427.857	429.678	215.833	238.044	227.94	462.106	451.195	451.195	103.359	113.953	105.59	122.665	123.797	124.033	147.666	144.207	153.889	259.063	258.766	264.67	206.015	207.059	188.884	355.766	349.974	338.626	cpz-1	-0.89949	0.103832	-1.97697	-1.77704	-1.51006	-0.698519	-1.07628	-0.282123	4.49471e-21	2.44701e-19	0.0038377	0.0382297	2.62673e-29	4.56184e-26	2.79571e-18	5.6457e-16	0.199924	4.44461e-05	0.000203828	-0.101126
WBGene00000789	cpz-2	68.1414	68.5851	68.5285	62.4422	57.5818	59.8871	66.0421	69.5139	66.4159	74.6101	71.9931	67.7356	45.2177	49.2485	50.4405	89.5965	89.141	87.7169	65.9669	64.2117	61.7735	40.4128	40.9532	43.4906	64.2997	68.8163	67.2226	cpz-2	-0.189376	-0.0232625	0.0598842	-0.504788	0.376062	-0.0963309	-0.7206	-0.0353417	0.000106871	0.000351491	0.576924	0.772449	0.159512	0.257938	0.0286183	0.0723667	-0.564673	2.15898e-13	4.60062e-12	-9.42941
WBGene00000792	crb-1	11.8966	15.0099	13.2963	8.36403	7.87602	7.82612	13.6676	15.2995	14.7781	14.9299	14.2178	16.0208	14.7554	13.3211	12.6164	16.7741	16.2629	16.7034	14.8544	15.2902	13.8321	13.3736	12.7529	13.0735	15.7669	15.6669	16.0874	crb-1	-0.726265	0.131689	0.181141	0.0284834	0.31864	0.139978	-0.0248416	0.253092	7.13365e-10	6.07953e-09	0.0638084	0.218831	0.0140334	0.0346705	0.0514988	0.115942	-0.152657	0.0369232	0.0763205	-0.842755
WBGene00000793	crh-1	22.5426	22.4537	20.7811	16.1901	15.9425	16.9979	20.8316	30.7647	32.6197	33.1134	33.8082	34.5306	25.8119	28.1639	26.1781	34.1227	37.8905	37.952	31.712	32.3521	30.8815	27.47	28.3251	26.2158	35.1474	35.8005	34.9091	crh-1	-0.420978	0.323965	0.626509	0.285955	0.744711	0.529706	0.321057	0.687235	0.000317947	0.000949086	0.00153027	0.0223705	1.7294e-07	1.93646e-06	3.0397e-06	3.59608e-05	-0.340554	0.00063878	0.00223258	-0.543574
WBGene00000794	crn-1	122.764	121.9	122.347	118.407	117.757	114.952	128.896	111.862	112.402	107.779	109.836	109.418	114.952	113.497	112.873	112.48	114.804	108.263	112.402	112.402	109.111	114.742	112.51	107.869	113.329	113.377	109.936	crn-1	-0.0636692	-0.0577987	-0.166316	-0.104654	-0.130368	-0.136376	-0.130337	-0.124661	0.102855	0.157146	0.135361	0.346348	0.000162814	0.000737889	0.00123615	0.0053751	0.0616619	0.121885	0.204995	-0.370751
WBGene00000795	crn-2	13.5533	13.2524	14.5201	17.5882	16.5207	17.893	13.8078	14.621	13.4874	15.6209	14.958	15.1742	17.5408	17.1094	17.2046	18.248	16.9053	17.893	16.0256	16.5178	15.9516	15.406	16.7122	16.9979	16.5872	14.9741	16.2828	crn-2	0.332102	0.021438	0.146828	0.328082	0.358596	0.23036	0.245969	0.209827	1.20433e-06	5.90671e-06	0.703235	0.852631	0.013734	0.0340206	0.000237753	0.00134104	0.181254	0.00242849	0.00729051	1.23447
WBGene00000796	crn-3	126.913	131.086	127.095	119.691	118.123	119.917	131.233	145.087	142.04	144.507	140.272	140.71	147.24	146.119	145.592	140.877	142.136	140.347	138.6	142.682	138.81	145.914	145.806	148.776	146.459	143.899	145.433	crn-3	-0.105782	0.118346	0.14413	0.189444	0.137156	0.125485	0.193926	0.178903	0.00164646	0.00417616	0.00045742	0.0122567	4.80078e-05	0.00025497	0.000251304	0.00139795	0.0453144	0.140797	0.230877	0.314399
WBGene00000797	crn-4	14.0287	15.7458	14.9858	15.2309	15.1434	15.8362	14.5466	13.623	14.5516	16.6974	14.3368	14.8009	15.6859	15.5847	15.0535	18.0238	16.1852	17.1356	14.63	14.3389	14.9365	16.4557	17.3939	15.0829	15.6345	14.6433	16.9282	crn-4	0.0492917	-0.0645483	0.0338652	0.0544557	0.197946	-0.0234008	0.135411	0.0773587	0.444669	0.533564	0.321941	0.568802	0.6036	0.708488	0.718807	0.81533	0.0205905	0.752666	0.828404	0.608013
WBGene00000798	crn-5	10.3635	10.1783	10.7688	10.804	10.1571	9.9069	10.7903	14.5251	13.8725	14.7492	16.7323	13.7129	15.2995	14.8436	16.2858	13.3936	14.2201	13.6609	13.6917	12.6693	13.9612	14.5835	14.9106	15.7968	13.6898	14.5251	15.3132	crn-5	-0.0187504	0.309092	0.520984	0.565947	0.39981	0.366025	0.52888	0.47383	0.834165	0.874	0.00101536	0.0180009	9.8468e-07	8.81946e-06	0.000170582	0.00101421	0.0449627	0.571803	0.681244	0.0863034
WBGene00000799	crn-6	11.398	12.675	12.8118	5.47858	5.35038	5.09061	12.1198	14.3345	14.5516	5.78797	5.53385	5.61999	5.96039	6.22506	6.18526	8.70477	8.69648	8.86771	9.35794	9.55047	10.1238	5.42136	6.28435	6.90261	11.9147	10.8197	11.5702	crn-6	-1.21041	0.149927	-1.1227	-1.00477	-0.48619	-0.344273	-1.00196	-0.102148	4.07769e-14	6.78977e-13	0.0304076	0.138079	2.54547e-13	1.00016e-11	4.67897e-05	0.000344175	0.11793	0.214942	0.322748	-0.105041
WBGene00000800	cars-1	215.127	216.403	213.451	221.302	218.546	213.451	214.23	191.861	197.555	197.004	206.758	197.741	200.926	203.912	203.09	194.372	197.741	192.407	196.144	198.052	202.906	199.801	200.273	209.887	197.166	197.555	198.052	cars-1	0.0188203	-0.0967244	-0.101223	-0.0853143	-0.142124	-0.111595	-0.0818088	-0.121712	0.550026	0.63277	0.00435324	0.0407182	0.00326187	0.00996462	0.00134503	0.00578055	0.0159091	0.620326	0.722985	-0.157168
WBGene00000801	cars-2	6.09221	5.79464	6.86793	5.47858	5.10263	5.15904	5.79464	5.2935	5.8954	5.40507	6.07967	6.33532	6.16759	5.55842	5.20433	7.07857	5.00708	5.58882	6.27881	5.91981	6.38265	6.83326	6.99299	6.64483	6.52334	6.34113	6.46006	cars-2	-0.248485	-0.14432	-0.0713662	-0.14646	-0.113411	-0.0101216	0.130229	0.0452034	0.0145726	0.02897	0.130095	0.338634	0.453652	0.577101	0.912894	0.947087	-0.0750938	0.443318	0.563253	1.05223
WBGene00000802	crt-1	853.199	837.097	815.066	1104.35	1111.41	1119.38	837.097	894.774	911.652	1010.32	1010.32	946.352	1201.77	1253.38	1228.76	1001.94	991.869	1031.22	921.334	907.777	911.652	1087.4	1065.84	1093.84	907.777	926.048	931.046	crt-1	0.412658	0.0759971	0.242628	0.556188	0.272224	0.129812	0.373811	0.142177	8.82138e-15	1.63502e-13	0.0122951	0.0781586	2.5251e-09	4.55857e-08	8.96595e-05	0.000595228	0.31356	5.46024e-12	9.02264e-11	1.29235
WBGene00000803	csb-1	27.8414	28.7611	26.943	26.636	23.0692	26.5997	28.6583	30.4382	30.3672	30.9732	30.2404	29.945	31.4287	30.0017	31.6948	33.1919	30.9732	32.4723	29.5861	30.0315	31.3562	33.716	30.6153	32.2974	33.787	32.3344	31.7312	csb-1	-0.130563	0.0987337	0.126246	0.156625	0.209273	0.122878	0.209466	0.229006	0.0170405	0.0331886	0.0566794	0.20342	0.0182576	0.0434981	0.0203077	0.0544854	0.0303791	0.548435	0.65974	0.240634
WBGene00000804	csc-1	68.2149	72.3918	75.3458	77.9869	77.9065	81.2953	73.1215	49.7864	49.5606	58.1492	56.9724	58.8626	62.4318	59.5122	56.9631	58.3332	55.497	60.7426	57.8155	57.7145	58.9548	61.1566	62.1262	51.137	63.5234	60.8447	54.3592	csc-1	0.136591	-0.342839	-0.308576	-0.269056	-0.304398	-0.305007	-0.30447	-0.272918	0.115214	0.173	0.000499776	0.012671	0.00158099	0.00531083	0.00162926	0.00678548	0.0395195	0.665225	0.760383	-0.128071
WBGene00000812	csk-1	84.9085	87.297	87.8708	94.5057	95.7222	92.2711	84.5731	84.0133	85.3344	84.9811	80.113	85.5588	93.0864	91.9996	94.1833	84.0558	85.7846	86.0361	83.7383	85.7846	84.1898	95.1675	94.7287	93.6507	87.5918	85.8163	87.6394	csk-1	0.119789	-0.0342506	-0.052734	0.102915	-0.0223795	-0.0357364	0.125497	0.00571714	0.000270357	0.00081885	0.247278	0.491641	0.0834286	0.154188	0.230579	0.365337	0.155649	1.17647e-05	6.08995e-05	-2.95159
WBGene00000813	csn-1	79.2836	79.2665	77.6984	86.6404	85.4655	85.6767	77.3617	82.4999	81.6068	86.2607	83.6624	81.9853	90.2885	90.1268	93.9655	82.5558	84.4611	80.6948	81.3459	82.0975	78.3441	90.6928	89.0664	98.2233	82.6427	76.9802	81.4407	csn-1	0.126151	0.0306481	0.0916392	0.215224	0.06775	0.0331346	0.230962	0.0282359	0.00183808	0.00461166	0.411758	0.652285	0.0196268	0.0462745	0.37806	0.522966	0.123584	0.00221617	0.00673105	1.3486
WBGene00000814	csn-2	113.497	110.629	104.978	113.168	113.402	108.574	106.597	115.629	113.554	113.581	112.907	109.588	118.674	121.115	124.596	113.527	115.659	116.822	112.841	108.344	110.527	121.309	121.732	133.098	108.776	112.107	117.345	csn-2	0.0267964	0.0282392	0.030012	0.146724	0.0732834	0.0123199	0.189748	0.0390274	0.492973	0.579495	0.468301	0.698171	0.445572	0.569953	0.752251	0.840043	0.116712	0.00531894	0.0145311	3.88885
WBGene00000815	csn-3	87.6394	90.2459	88.2199	92.4179	84.4776	84.6482	88.1549	94.8064	100.366	96.9982	96.6027	92.8624	96.481	91.6408	96.0069	97.635	92.8624	97.1923	88.7079	91.6867	94.076	97.1214	96.6795	103.66	93.5952	93.0579	95.7655	csn-3	-0.0239078	0.0876013	0.105836	0.0942837	0.112204	0.0439069	0.158612	0.0861219	0.572305	0.652609	0.0429143	0.170003	0.0169532	0.0408528	0.300983	0.442981	-0.0115525	0.783638	0.851335	-0.109155
WBGene00000816	csn-4	78.4825	79.8905	79.6589	81.4069	78.7882	80.2142	77.9869	80.935	81.1025	86.0519	86.6631	88.8845	85.6421	85.1126	86.912	95.601	93.1302	90.9831	82.2869	87.4769	85.1951	91.0561	89.0219	92.5853	85.4457	91.3935	84.2734	csn-4	0.0149711	0.0117195	0.136807	0.114344	0.231568	0.0977322	0.19521	0.133316	0.657522	0.72655	0.727126	0.864813	0.000311571	0.00129668	0.00645479	0.0212432	-0.0224632	0.504745	0.619849	-0.164196
WBGene00000817	csn-5	82.2172	79.4369	80.0521	78.3441	81.1025	76.0719	80.0901	75.4652	73.9894	71.2118	74.4052	72.5745	74.492	75.2022	77.6758	79.0128	77.281	77.3617	73.2527	74.8431	71.0859	74.6967	74.151	74.322	73.8108	71.0619	77.2999	csn-5	-0.0382491	-0.0748046	-0.14827	-0.0892618	-0.0499308	-0.142051	-0.11544	-0.123199	0.285802	0.370592	0.0417749	0.167587	0.000280053	0.00118338	0.000413517	0.00213955	0.0590082	0.113781	0.193785	-0.397978
WBGene00000818	csn-6	68.2914	71.8248	72.1104	82.0795	79.8905	78.2523	70.4285	59.0647	56.8168	61.6316	60.0104	61.0122	68.6676	68.2586	69.7908	61.1667	63.1129	62.6448	60.2128	58.9831	59.7062	67.271	66.9896	66.0315	57.943	59.275	59.285	csn-6	0.180497	-0.190714	-0.215098	-0.0370772	-0.181058	-0.244636	-0.0816187	-0.26467	0.000401659	0.0011704	0.000290865	0.00983482	8.54282e-05	0.000420173	1.42512e-05	0.000128371	0.178021	0.000782293	0.00266917	-0.827626
WBGene00000819	csp-1	0.735531	1.00337	1.15628	1.13025	1.32867	1.18946	0.913106	1.08565	1.12688	1.08663	1.14717	0.814351	1.26738	1.44118	1.66622	0.937798	1.18748	1.32981	1.10134	1.10134	0.768794	1.08916	1.2149	0.953094	1.29495	1.10134	1.04526	csp-1	0.360076	0.135102	0.0809028	0.616313	0.296768	0.0565451	0.209177	0.279147	0.0719294	0.115314	0.49915	0.719174	0.695205	0.782832	0.782622	0.860894	0.53541	0.00983501	0.0246471	6.61794
WBGene00000820	csp-2	1.99152	1.97387	2.15096	2.40223	2.32367	2.5241	2.10713	1.85052	2.32425	2.40565	2.20731	2.09726	2.85137	2.8116	2.26852	2.0085	1.94727	2.12392	2.29954	2.05656	2.28996	2.97331	3.01479	2.36419	1.91274	1.94486	1.81644	csp-2	0.244186	0.0279644	0.129007	0.372916	-0.00539541	0.123174	0.45437	-0.106625	0.0480779	0.0813571	0.818959	0.915874	0.299761	0.422183	0.316624	0.459795	0.243908	0.0476375	0.0947783	1.89065
WBGene00000821	csp-3	0.196961	0.204483	0.280548	0.129589	0.204483	0.12278	0.248825	0.273059	0.0899412	0.140385	0.112896	0.0661117	0.14382	0.115381	0.163406	0.169382	0.165854	0.210348	0.170646	0.133009	0.155218	0.273059	0.269248	0.140385	0.154068	0.174816	0.211465	csp-3	-0.597132	-0.260958	-1.14514	-0.683565	-0.296788	-0.54327	-0.00780616	-0.326521	0.152641	0.219647	0.497006	0.718154	0.0203455	0.0477552	0.189612	0.315511	0.461579	0.346928	0.467257	-0.403075
WBGene00000822	csq-1	170.067	165.617	173.207	129.652	138.855	135.831	170.019	161.698	157.757	122.499	133.998	123.109	104.68	100.687	107.074	123.451	124.346	122.546	141.314	136.664	142.483	113.851	112.941	115.468	127.638	128.226	135.165	csq-1	-0.333523	-0.0562842	-0.424777	-0.704997	-0.458761	-0.275296	-0.572966	-0.380892	3.44753e-10	3.08784e-09	0.116504	0.316492	1.90646e-12	6.3918e-11	1.69594e-08	4.53826e-07	-0.280219	3.70811e-08	3.08275e-07	0.659685
WBGene00000829	ctb-1	903.849	807.108	832.761	655.312	663.729	628.869	821.638	1184.8	1166.7	1143.28	1143.28	982.961	811.642	828.918	880.388	845.773	865.917	750.453	1691.14	1569.58	1781.71	1691.14	1654.9	2077.75	1240.3	1275.47	1409.29	ctb-1	-0.38498	0.298142	0.357491	-0.0139429	-0.0511918	0.987078	1.08203	0.624254	0.000577694	0.00162633	0.00410975	0.0395424	0.000856755	0.00310437	2.31981e-11	1.23583e-09	-0.371434	0.000612149	0.0021525	-1.039
WBGene00000830	ctl-1	0.249852	0.306282	0.479036	0.403607	0.513777	0.423735	0.447775	0.439527	0.786693	0.377175	0.439527	0.439527	0.345064	0.386511	0.431352	0.27634	0.346131	0.44407	0.355563	0.365129	0.34017	0.309995	0.591483	0.346131	0.402362	0.44407	0.559924	ctl-1	0.419786	0.679932	0.33935	0.218798	0.101631	0.0948897	0.282681	0.486767	0.17254	0.243757	0.0263368	0.126386	0.278521	0.398672	0.765379	0.848591	-0.120552	0.691421	0.7809	-0.355244
WBGene00000831	ctl-2	45.1614	49.1349	50.863	72.8242	74.4758	74.4453	53.6779	47.1708	47.5901	21.9587	23.4201	22.9892	29.7328	31.4021	30.0087	25.3816	24.7716	23.6866	33.3925	34.5949	32.964	42.4558	45.6411	41.643	40.5221	38.1096	36.7029	ctl-2	0.613884	0.0339882	-1.08339	-0.668186	-0.975477	-0.521997	-0.157894	-0.329629	1.11846e-13	1.71745e-12	0.485325	0.709863	1.78929e-17	1.56154e-15	7.19167e-11	3.38476e-09	0.415206	1.45102e-07	1.08949e-06	-0.383246
WBGene00000832	ctn-1	19.7915	19.4323	20.7403	21.2632	22.1565	21.2876	19.9155	20.6257	20.09	18.6534	19.2523	20.6257	22.8444	23.2851	22.6067	21.6182	18.8314	21.1674	20.9602	22.5595	20.9437	23.3961	24.4408	21.5869	22.5617	21.4101	20.3508	ctn-1	0.10897	0.0161434	-0.0334609	0.197397	0.0346638	0.101613	0.214025	0.100416	0.0575408	0.0949313	0.772264	0.891038	0.560225	0.673177	0.0760098	0.156665	0.230858	0.000307791	0.00116104	-6.89933
WBGene00000833	cts-1	795.68	767.504	767.504	750.453	750.453	731.118	764.314	825.029	825.029	1150.72	1057.46	1111.41	921.334	898.753	918.988	1295.3	1240.3	1228.76	1057.46	1057.46	1015.8	761.271	780.997	775.575	1104.35	1119.38	1150.72	cts-1	-0.0624529	0.0494006	0.50934	0.232589	0.690195	0.425486	-0.00830722	0.533503	0.0544302	0.0904759	0.120256	0.322946	3.17979e-16	2.09975e-14	3.05975e-14	3.1258e-12	-0.276752	5.57291e-10	6.46093e-09	-0.543353
WBGene00000834	cua-1	121.309	127.127	120.799	121.676	117.709	119.182	119.214	143.315	147.195	166.314	166.716	169.623	146.36	151.897	153.35	147.448	145.993	144.097	165.405	165.617	163.654	154.167	151.074	163.29	149.488	141.592	150.623	cua-1	-0.0410863	0.143342	0.446222	0.291029	0.245292	0.422969	0.342288	0.258768	0.403422	0.492841	0.00551279	0.0476085	3.12251e-10	6.83841e-09	9.27967e-10	3.43625e-08	-0.155192	0.00247283	0.00740697	-0.347792
WBGene00000835	cuc-1	24.5366	20.5424	21.2187	18.0848	19.7365	19.1739	19.2457	21.5869	20.1288	71.6119	72.2489	64.255	37.0857	35.6821	39.0163	21.1742	22.0547	19.8569	72.0411	65.0507	69.1557	25.7254	25.2704	29.5211	20.2065	20.0089	20.7125	cuc-1	-0.221912	-0.122336	1.64843	0.752725	-0.0749118	1.64049	0.27111	-0.122069	0.00548943	0.012235	0.100974	0.289805	4.36345e-21	7.42941e-19	4.80094e-21	1.46277e-18	-0.895701	2.0939e-15	6.31334e-14	-0.543367
WBGene00000836	cul-1	164.762	174.48	171.509	180.753	177.47	188.972	165.117	166.112	165.368	170.661	167.179	166.006	173.338	170.812	179.467	173.954	179.05	173.038	166.869	168.851	168.945	176.229	182.887	181.192	167.084	167.179	167.991	cul-1	0.0996956	-0.0395331	-0.0189974	0.0361332	0.0434459	-0.0165215	0.081808	-0.0232126	0.00145093	0.00373142	0.174508	0.402672	0.511976	0.630512	0.56633	0.693614	0.0551306	0.0646353	0.122219	-2.90201
WBGene00000837	cul-2	243.279	249.045	246.216	266.402	271.159	269.226	246.776	208.749	210.119	209.423	200.556	210.119	220.795	212.874	216.035	206.5	203.323	206.108	212.195	205.603	208.979	221.498	228.681	218.37	214.45	208.749	202.773	cul-2	0.127559	-0.153029	-0.251797	-0.184737	-0.261663	-0.236005	-0.142883	-0.238486	0.00275146	0.00662204	0.00056055	0.0134835	7.85776e-07	7.23189e-06	2.08192e-06	2.6334e-05	0.0670604	0.108757	0.187016	-0.266327
WBGene00000838	cul-3	258.464	261.108	251.575	269.226	272.156	268.843	267.031	252.705	257.278	253.238	251.828	254.057	256.128	263.413	248.538	250.377	258.019	260.755	256.128	251.828	251.575	253.474	259.42	244.972	263.055	255.194	259.063	cul-3	0.0715311	0.0109887	-0.022255	-0.00534916	-0.00278872	-0.0213385	-0.0241672	0.0116131	0.0144025	0.0286909	0.691698	0.845549	0.428728	0.554162	0.445818	0.588606	0.0169058	0.548557	0.659841	-0.759642
WBGene00000839	cul-4	81.6275	79.4369	80.2439	88.1982	87.6522	81.8297	79.6926	99.3815	100.444	102.929	97.8793	101.947	103.615	107.841	110.527	106.363	98.3477	95.9452	95.2985	101.159	99.3815	108.639	104.23	113.074	95.2985	94.2339	99.2721	cul-4	0.0944845	0.202075	0.326957	0.415143	0.313031	0.292215	0.431179	0.25852	0.113731	0.171054	0.00143415	0.0216206	3.9184e-06	2.93449e-05	1.98527e-05	0.000168268	0.0881861	0.126944	0.212165	0.269718
WBGene00000840	cul-5	72.9225	71.1604	68.9505	74.2152	76.7559	74.4453	70.7307	76.3191	74.8431	75.823	79.0012	74.9654	83.0226	81.0073	82.813	79.7641	78.3599	77.9337	74.8995	71.6661	74.2005	78.86	82.6551	85.4655	73.912	73.1713	76.2774	cul-5	0.0809527	0.0577351	0.108296	0.212317	0.147343	0.0520372	0.210986	0.0679014	0.0298723	0.0541085	0.112858	0.310225	0.00499713	0.0143994	0.153959	0.270245	0.104021	0.00630948	0.0168761	0.960523
WBGene00000841	cul-6	5.41206	5.82861	5.80371	18.5728	18.3043	17.8187	5.88442	6.80092	6.69605	7.00087	6.95836	7.12142	14.8954	15.1778	15.8109	11.398	11.0784	11.1704	7.3151	6.30804	6.46006	18.4207	17.7827	19.6296	9.45682	8.61028	8.9699	cul-6	1.68702	0.18355	0.310157	1.4311	0.983502	0.242561	1.71095	0.667627	1.94319e-20	9.50632e-19	0.0220986	0.114052	0.000335579	0.00138137	0.00346315	0.0127075	1.12095	5.87043e-16	1.98736e-14	3.61412
WBGene00000843	cup-2	97.0221	91.3504	98.1826	113.851	112.142	111.683	102.828	87.9252	84.9925	86.8951	91.6638	88.1549	98.3188	101.427	98.3766	94.4673	90.0592	93.0043	86.6177	86.3755	84.4265	92.1688	94.4843	88.8606	89.8044	91.0273	89.3251	cup-2	0.237016	-0.0588301	-0.103967	0.0571531	-0.0470512	-0.154541	-0.055635	-0.084978	8.9168e-06	3.66962e-05	0.197124	0.431165	0.0290506	0.0645004	0.0018985	0.00764819	0.16112	0.001338	0.00430235	-1.54972
WBGene00000845	cup-4	11.0849	11.9194	10.1687	9.0502	10.4692	10.091	10.5597	11.305	11.7142	10.1318	10.3083	9.55317	10.7717	10.4428	10.6237	9.84098	10.1375	10.175	10.0824	9.20173	10.7717	10.4304	10.2779	13.0276	10.4244	10.0434	10.2424	cup-4	-0.168227	0.0189186	-0.144935	-0.0552224	-0.132469	-0.1394	0.00818584	-0.107264	0.0362017	0.0639457	0.799285	0.90703	0.0713742	0.135738	0.0785968	0.160831	0.0897129	0.262401	0.377478	-0.618986
WBGene00000846	cup-5	85.6104	86.2193	81.738	86.7248	85.5815	82.0462	82.9384	86.3404	89.0664	87.0711	82.1168	83.7539	90.8726	90.6928	90.4664	89.0494	88.2922	84.5282	83.2527	87.1962	82.421	91.5866	89.6779	94.2501	84.6176	82.408	89.0219	cup-5	0.00529086	0.0260426	-0.00377353	0.101971	0.0453294	-0.00472886	0.118771	0.0134328	0.885852	0.91428	0.478877	0.705698	0.919059	0.946696	0.898074	0.937085	0.105745	0.00755985	0.0197224	-28.0228
WBGene00000851	cut-1	0.279805	0.306282	0.0557608	0.347299	0.401299	0.392683	0.212778	0.240311	0.299501	0.240311	0.084508	0.19592	0.204483	0.548838	0.404605	0.392683	0.224709	0.270359	0.170646	0.404605	0.18888	0.167091	0.341222	0.423735	0.222487	0.412165	0.246492	cut-1	1.19007	0.56465	-0.0836265	1.10653	0.765852	0.463475	0.765155	0.77051	0.0305187	0.0551643	0.305731	0.55339	0.890003	0.928273	0.405977	0.550985	1.19016	0.0442033	0.0890185	-14.2318
WBGene00000853	cut-6	0.877423	0.633246	0.954048	5.11824	4.8853	5.32961	0.842509	1.53356	0.934651	0.609498	0.86597	0.781823	3.69623	4.21525	4.05378	1.37082	1.08335	0.793842	0.699597	0.826354	0.812844	3.20558	3.01479	3.48944	1.4346	1.04526	1.21588	cut-6	2.66461	0.394574	-0.131947	2.30422	0.343835	-0.0793927	1.9929	0.587078	1.37117e-12	1.78509e-11	0.092452	0.274276	0.608298	0.712315	0.750194	0.83877	2.43616	1.91118e-10	2.40518e-09	-18.4633
WBGene00000854	cux-7	45.4479	43.8108	44.6855	45.3325	40.2187	44.2098	44.8731	46.8892	47.434	45.7675	43.2564	44.2098	45.7381	44.6326	45.9982	44.0764	45.6411	46.2057	43.145	46.3427	44.6005	46.638	47.5615	49.3546	45.9023	42.5338	45.3699	cux-7	-0.046143	0.0539228	-0.00874289	0.0248815	0.0220592	-0.00134029	0.0974713	-0.00319081	0.289566	0.374815	0.210116	0.447504	0.840217	0.893713	0.975118	0.986019	0.0336244	0.442482	0.562644	-3.84591
WBGene00000857	cwn-1	7.69441	7.18008	6.63145	5.69527	6.13384	4.93994	7.5155	5.97832	6.69605	5.20544	5.73986	6.16627	5.11617	5.3218	5.62122	6.54997	6.22384	6.26396	6.32596	5.59615	6.30924	5.69213	6.28435	5.63461	6.69032	6.55433	7.00656	cwn-1	-0.360778	-0.0958864	-0.32675	-0.422075	-0.177165	-0.234649	-0.284138	-0.0868414	0.000384948	0.00113082	0.265189	0.512295	0.00118597	0.00412679	0.0122103	0.0358084	-0.0953253	0.327385	0.44675	0.291738
WBGene00000858	cwn-2	3.98996	3.82485	3.69213	2.24441	2.21099	2.03249	3.62644	3.47876	3.48216	3.36469	3.62511	3.19142	2.75677	3.62406	3.03099	3.18438	3.18233	3.6722	3.27504	3.50524	3.19142	3.30454	2.62945	3.23016	3.07017	2.85797	3.01688	cwn-2	-0.824608	-0.12006	-0.181925	-0.296714	-0.193401	-0.210114	-0.341489	-0.364732	8.13963e-08	4.94442e-07	0.221253	0.461894	0.0794193	0.147959	0.0427236	0.100138	-0.114789	0.282833	0.399248	0.630972
WBGene00000859	cwp-1	0.222487	0.0933673	0.212778	0.129589	0.0866407	0.0557608	0.12126	0.306282	0.0899412	0.0808829	0.20813	0.19592	0.0432314	0.115381	0.192078	0.092211	0.165854	0.0648727	0.0728896	0.0957236	0.052684	0.125671	0.052684	0.140385	0.253557	0.174816	0.176446	cwp-1	-0.931062	-0.135826	-0.147678	-0.769713	-0.74246	-1.21329	-0.788458	0.250273	0.134779	0.197694	0.794612	0.904802	0.782473	0.851827	0.0681444	0.144219	-0.622035	0.300457	0.418044	4.2121
WBGene00000860	cwp-2	0.049777	0.204483	0.179976	0.210348	0.341222	0.240311	0.052188	0.240311	0.231815	0.0808829	0.140385	0.19592	0.092211	0.174276	0.07642	0.129589	0.165854	0.270359	0.231815	0.174276	0.37194	0.204483	0.306282	0.0957236	0.222487	0.115381	0.282599	cwp-2	1.0923	0.234696	0.147403	-0.141007	0.61979	1.04491	0.647205	0.682689	0.0693651	0.11175	0.706964	0.85495	0.819637	0.880039	0.0827921	0.167464	-0.28841	0.666886	0.761561	-1.95661
WBGene00000862	cwp-4	0.760427	0.44667	0.545169	0.765711	0.513777	0.62757	0.682401	0.636929	0.59979	1.04991	0.801822	0.728255	0.896232	0.993491	0.59979	0.851439	0.913106	0.567005	0.481012	0.515529	0.590267	0.742306	0.623883	0.513777	0.760427	0.671813	0.386511	cwp-4	0.136546	0.149581	0.545186	0.502374	0.375851	-0.132414	0.121158	0.0199728	0.62673	0.699873	0.589039	0.781321	0.048283	0.0984539	0.653743	0.765631	-0.0428122	0.861452	0.909087	-0.0785278
WBGene00000863	cya-1	89.3966	88.671	92.3369	92.1688	94.7451	93.4959	90.0012	96.5201	95.7655	104.325	104.528	105.293	107.271	102.33	108.167	103.388	100.644	102.142	100.399	101.349	103.08	109.86	109.957	106.063	99.1103	101.947	102.761	cya-1	0.0519924	0.0610304	0.21653	0.232066	0.17884	0.17265	0.269978	0.167994	0.109808	0.166003	0.0614178	0.213585	1.54442e-07	1.75861e-06	6.43886e-06	6.70808e-05	0.0155355	0.620409	0.722985	0.0717476
WBGene00000864	cya-2	0.222487	0.23574	0.479036	0.236835	0.234285	0.178866	0.284702	0.273059	0.26335	0.377175	0.140385	0.315972	0.345064	0.287354	0.312325	0.169382	0.346131	0.151511	0.481012	0.252514	0.513777	0.309995	0.374786	0.140385	0.363901	0.278511	0.454863	cya-2	-0.427055	-0.0917546	-0.175881	0.100976	-0.482825	0.456584	-0.152407	0.283227	0.327329	0.414611	0.818875	0.915855	0.674891	0.76702	0.229097	0.363454	0.276858	0.509327	0.624081	-1.57412
WBGene00000865	cyb-1	331.391	332.496	345.561	398.139	398.139	407.677	346.673	314.865	294.311	319.598	296.24	302.795	364.529	356.581	360.448	294.824	298.644	294.141	310.96	297.714	305.575	342.558	349.974	350.698	293.472	290.388	293.198	cyb-1	0.254196	-0.0803474	-0.136635	0.0997295	-0.185256	-0.142212	0.0475129	-0.202564	9.39521e-08	5.66158e-07	0.0351661	0.150278	0.000880625	0.00317893	0.000563965	0.0027944	0.236364	5.44117e-07	3.64993e-06	-1.7299
WBGene00000866	cyb-2.1	72.4833	74.6212	71.044	70.247	66.1941	66.8173	71.9122	69.0682	68.864	68.722	64.0477	65.8063	61.1086	61.2458	61.2812	67.0744	65.2479	65.8726	67.1065	64.3771	61.0534	64.9943	62.4422	66.2752	64.3533	67.7716	64.4987	cyb-2.1	-0.100398	-0.0551277	-0.135643	-0.247719	-0.138388	-0.179222	-0.172339	-0.149271	0.011013	0.0226909	0.142549	0.356927	0.00109612	0.00384339	4.4779e-05	0.000331632	-0.112076	0.00658935	0.0175222	0.826254
WBGene00000867	cyb-2.2	158.607	158.32	157.965	148.475	149.488	147.38	157.401	136.699	137.888	143.692	134.13	136.733	127.708	130.112	133.294	138.919	137.374	141.72	135.953	137.291	129.74	133.347	130.655	142.863	138.855	136.438	139.703	cyb-2.2	-0.0927376	-0.1389	-0.196942	-0.280616	-0.183919	-0.237357	-0.225975	-0.194712	0.0257829	0.0476353	0.00144952	0.0217576	3.22678e-05	0.000180482	1.9501e-06	2.49208e-05	-0.0836749	0.0489926	0.0970188	0.424872
WBGene00000868	cyb-3	534.837	527.489	555.545	628.869	618.58	618.58	553.046	528.207	528.207	563.616	540.35	565.454	701.411	698.077	701.411	575.714	579.164	581.049	541.948	526.772	534.837	663.729	655.312	688.868	571.81	553.046	563.616	cyb-3	0.206286	-0.00738861	0.045439	0.377058	0.10198	-0.0123204	0.310666	0.061616	6.11357e-09	4.4705e-08	0.773307	0.891827	0.0859887	0.158045	0.632957	0.748507	0.331619	1.39295e-13	3.07778e-12	7.29813
WBGene00000869	cyc-1	367.567	355.766	360.448	309.143	320.184	314.865	360.448	373.028	370.589	448.142	452.44	442.855	373.028	376.658	369.793	403.028	403.028	404.837	423.67	432.304	413.706	343.088	347.734	332.775	381.831	398.139	391.079	cyc-1	-0.199692	0.0262606	0.30939	0.0466616	0.159867	0.227774	-0.0821348	0.111374	1.02042e-08	7.20685e-08	0.29525	0.543871	3.6428e-13	1.38434e-11	4.13367e-10	1.68916e-08	-0.262729	1.78979e-11	2.69586e-10	-0.849182
WBGene00000870	cyd-1	11.1356	10.6383	12.258	9.02198	8.88353	10.2075	10.8886	10.7325	9.79592	8.88588	9.64933	9.1324	11.398	11.5894	11.2785	12.2075	11.3367	11.2193	8.55367	9.74445	9.61074	11.379	9.45682	9.92985	10.6092	9.54569	10.3341	cyd-1	-0.280177	-0.113138	-0.29943	0.0115817	0.0265605	-0.293066	-0.147959	-0.159681	0.000747574	0.00205202	0.124477	0.329843	0.000463932	0.00182079	0.000491131	0.00247446	0.311011	0.000327292	0.00122793	-1.03868
WBGene00000871	cye-1	178.512	170.448	180.753	172.514	173.468	171.128	177.074	159.4	148.776	150.447	150.346	152.384	145.592	141.48	146.263	149.552	149.616	143.842	154.167	150.241	152.964	153.566	155.567	162.107	151.074	147.039	150.779	cye-1	-0.0347691	-0.128754	-0.225008	-0.290172	-0.258844	-0.211573	-0.170134	-0.239084	0.373494	0.462691	0.00234993	0.0283018	3.46936e-06	2.63456e-05	8.13533e-06	8.12457e-05	-0.0651642	0.113431	0.193361	0.289609
WBGene00000872	cyk-1	80.6408	86.3253	81.5689	74.362	75.1879	75.4652	85.0039	88.7259	80.2439	73.0206	72.8981	74.9654	75.9545	75.9819	77.073	80.6566	76.5636	78.2709	79.4164	79.5968	78.497	81.1025	80.4136	82.8443	82.0795	85.2869	86.1612	cyk-1	-0.142254	0.0327143	-0.168299	-0.116754	-0.0776704	-0.0639578	-0.0238039	0.029894	0.000299278	0.000897988	0.342414	0.587794	4.3793e-05	0.000235029	0.0729285	0.15212	0.0515454	0.15551	0.249744	-0.306273
WBGene00000874	cyk-3	126.54	122.629	122.499	118.707	118.382	116.939	119.521	131.933	132.787	123.546	123.498	124.813	122.255	120.898	122.701	122.594	117.406	120.053	118.674	121.828	126.81	123.69	128.154	129.248	124.137	122.183	125.446	cyk-3	-0.0702453	0.0454129	0.00062621	-0.0231169	-0.0469159	-0.0183861	0.0350504	-1.21133e-06	0.0465461	0.079205	0.184229	0.415171	0.985341	0.991104	0.589186	0.712959	-0.0237431	0.49042	0.606331	-37.9156
WBGene00000875	cyk-4	197.741	205.681	202.64	213.617	218.903	219.173	200.556	175.108	175.108	185.079	184.253	188.796	199.513	206.408	198.274	184.728	183.772	184.125	183.305	188.065	188.181	203.323	208.564	197.963	192.095	188.796	184.728	cyk-4	0.104813	-0.139542	-0.118028	-0.00376036	-0.132618	-0.115097	0.0101043	-0.0991201	0.00612711	0.0135106	0.000537922	0.0131764	0.00279107	0.00870869	0.00330201	0.0121857	0.114268	0.0037666	0.0107009	-0.96814
WBGene00000876	cyl-1	77.834	79.1973	76.3355	83.2673	78.8399	84.7003	78.5115	78.9184	79.8739	84.9811	87.7965	86.6177	97.14	100.051	93.3403	86.4483	84.3476	82.6051	84.9404	84.6308	83.9312	88.7505	88.048	85.9768	79.5968	86.5836	85.83	cyl-1	0.0809073	0.0242865	0.152903	0.31665	0.117788	0.119909	0.172278	0.110314	0.0285136	0.0519946	0.49377	0.715623	0.000157377	0.000716425	0.00188434	0.007607	0.163747	5.577e-05	0.000250532	1.07092
WBGene00000877	cyn-1	97.5923	91.5866	99.2394	69.9092	73.4033	83.8505	92.6263	70.3201	71.0226	75.2445	81.5325	80.8862	52.9548	61.7669	55.7677	61.2056	64.3652	65.5445	85.3016	83.3306	82.7105	63.5967	62.6348	61.0534	76.0205	63.1813	61.5548	cyn-1	-0.351131	-0.311463	-0.279184	-0.759912	-0.59157	-0.197826	-0.621324	-0.528629	9.46617e-05	0.000315061	0.000347194	0.0106103	0.00118168	0.00411516	0.014986	0.0423535	-0.480728	2.72992e-06	1.6148e-05	1.7219
WBGene00000878	cyn-2	21.7608	20.9893	23.4376	26.2755	26.5449	29.0527	22.3483	20.3209	20.0049	22.197	24.5994	22.6804	19.6142	19.057	18.6436	20.6486	20.0165	19.6403	19.4159	20.8917	22.4978	21.5203	20.6057	20.8993	17.5882	20.5807	17.2046	cyn-2	0.304156	-0.0782391	0.068365	-0.20682	-0.136289	-0.0808532	-0.0702822	-0.26006	2.81089e-05	0.00010487	0.226774	0.468799	0.2895	0.411268	0.216407	0.347801	-0.275185	0.000240327	0.000931434	-4.02523
WBGene00000879	cyn-3	120.416	121.471	126.642	125.623	125.104	121.309	127.868	93.0579	96.6284	99.0205	99.1713	92.3548	98.6946	100.624	98.975	100.709	100.444	103.7	100.14	101.664	99.3361	102.431	103.33	89.3448	101.324	105.692	98.2543	cyn-3	0.0143707	-0.22732	-0.344147	-0.304311	-0.272522	-0.29092	-0.319164	-0.271408	0.827823	0.868689	0.00186871	0.024946	2.11832e-05	0.000124962	0.000162275	0.000974494	0.0398358	0.568477	0.678259	-0.115752
WBGene00000880	cyn-4	58.3822	57.5702	58.9198	73.4913	73.7357	70.3454	59.7062	60.0104	63.2156	67.1065	65.9423	64.7669	79.6589	78.6703	82.2172	65.3355	65.4309	64.5667	64.6266	67.4307	65.4046	79.3958	76.5129	82.1863	63.6275	64.8395	69.0519	cyn-4	0.315324	0.0634011	0.176984	0.459286	0.159144	0.174015	0.442931	0.174384	1.33085e-09	1.07803e-08	0.0916061	0.272979	3.97816e-05	0.000216105	4.5982e-05	0.000339383	0.282302	1.06767e-08	9.83675e-08	1.59507
WBGene00000881	cyn-5	344.161	348.649	367.567	369.793	388.325	393.027	366.668	302.795	293.811	255.506	258.766	259.42	293.811	284.236	288.877	294.141	289.094	297.353	286.909	271.951	278.153	279.673	281.106	234.183	313.526	319.076	295.195	cyn-5	0.117816	-0.143348	-0.453624	-0.289908	-0.267116	-0.339877	-0.416151	-0.19239	0.0428856	0.073881	0.0164284	0.0946915	1.41032e-08	2.15607e-07	2.01264e-06	2.55509e-05	0.163716	0.00945928	0.0238535	-0.360907
WBGene00000882	cyn-6	25.6848	25.8476	26.5997	98.6305	107.357	103.859	25.9489	24.0714	24.0714	19.5749	22.0022	20.02	70.2646	67.3547	69.1659	21.6182	20.763	22.083	20.9297	21.1916	20.9049	57.9932	57.1422	53.8686	23.8332	21.6876	19.9598	cyn-6	1.98539	-0.0762536	-0.345439	1.4038	-0.277117	-0.309936	1.11463	-0.257609	1.66572e-26	3.36379e-24	0.17774	0.407178	2.34908e-06	1.88089e-05	9.51266e-06	9.21396e-05	1.74924	2.00903e-23	3.00783e-21	-5.06382
WBGene00000883	cyn-7	1057.46	1044.51	1051.92	1093.84	1071.24	1093.84	1051.92	961.017	967.183	1081.89	1104.35	1037.75	1026.6	1015.8	982.961	1184.8	1192.57	1211.65	1010.32	986.813	996.872	1015.8	1026.6	982.961	1087.4	1104.35	1104.35	cyn-7	0.0472537	-0.0826398	0.0305764	-0.0600149	0.18666	-0.0748705	-0.0596142	0.0634839	0.096015	0.148064	0.00556986	0.047864	0.277086	0.396977	0.0113299	0.0336815	-0.0905912	0.00289098	0.00851122	-2.96278
WBGene00000884	cyn-8	24.3309	22.8947	24.2546	26.325	24.9749	24.1782	23.251	23.7761	23.609	21.7092	21.8241	23.5882	29.4172	29.3365	29.8576	25.3186	25.199	23.6866	23.5516	21.8537	23.1781	28.2231	27.8989	28.0298	23.9538	23.4008	23.8152	cyn-8	0.0793611	-0.017992	-0.0900273	0.308573	0.0501952	-0.0588093	0.234815	-0.00723177	0.0825358	0.129837	0.687418	0.843228	0.0582241	0.114959	0.201162	0.329988	0.3986	1.07823e-09	1.18517e-08	-4.42754
WBGene00000885	cyn-9	34.6838	33.928	35.8609	38.1827	35.3825	37.5314	33.8549	34.2624	35.4794	37.5237	37.7529	36.4742	33.7413	36.5423	38.1692	36.8776	32.6789	37.1375	39.124	36.639	35.1544	37.963	37.7976	40.5681	36.7475	34.4564	36.5907	cyn-9	0.0892193	-0.0134391	0.0961063	0.0507066	0.0269217	0.0870632	0.151585	0.0440575	0.0935795	0.144719	0.796471	0.905844	0.0742581	0.1403	0.10192	0.196912	-0.0453997	0.389878	0.511598	-0.472391
WBGene00000886	cyn-10	25.6375	23.0283	21.531	25.0625	25.4353	22.6906	23.29	20.1742	19.3029	21.1115	20.9963	20.8062	22.2122	23.251	23.7246	20.3712	23.4327	21.1674	19.9526	21.1429	20.2612	22.889	21.8158	22.0241	20.8134	19.515	22.2468	cyn-10	0.0615356	-0.161372	-0.156413	-0.0205707	-0.10954	-0.194422	-0.070865	-0.167238	0.353667	0.442085	0.0220965	0.114052	0.0290182	0.0644366	0.00758838	0.0242301	0.135842	0.0575044	0.110969	-0.868484
WBGene00000887	cyn-11	33.8549	35.917	37.7458	35.3265	34.5437	34.7038	34.5882	25.2596	23.609	24.2345	27.2483	26.4085	28.8801	27.2289	26.7329	28.8862	28.9653	27.5387	24.8782	26.951	22.8365	28.4688	28.4127	27.0632	25.5028	25.7181	23.7335	cyn-11	-0.0368023	-0.377603	-0.462727	-0.373199	-0.331431	-0.527653	-0.352149	-0.517697	0.635575	0.707789	5.53581e-05	0.00465709	5.14522e-06	3.72011e-05	5.92951e-07	9.42327e-06	0.0895284	0.303652	0.421309	-0.19348
WBGene00000888	cyn-12	37.5193	35.0473	36.9264	36.5152	33.1024	35.677	36.5785	30.5297	31.7585	34.8371	33.3524	32.6371	33.7088	34.291	36.2696	32.6977	33.728	34.8049	33.1806	33.1858	30.8312	34.5437	34.3921	32.4723	32.4921	33.8667	32.2343	cyn-12	-0.0562247	-0.150826	-0.120818	-0.0728749	-0.111621	-0.172475	-0.108942	-0.151729	0.295231	0.380672	0.00806883	0.0603754	0.0324332	0.0705937	0.00321077	0.011892	0.0479428	0.385584	0.507114	-0.396819
WBGene00000889	cyn-13	66.4159	66.6476	66.5169	69.0682	72.3215	72.4833	67.94	56.0048	57.9481	56.7905	58.523	56.7353	63.3618	65.9314	64.0832	61.1848	59.0969	59.1064	60.2128	60.2774	57.013	64.5358	65.8276	61.578	59.4624	63.6275	62.2719	cyn-13	0.0983554	-0.137806	-0.214502	-0.0454418	-0.155171	-0.169263	-0.0549644	-0.10701	0.0410775	0.0712539	0.00625481	0.051362	0.000107586	0.000514016	0.00122852	0.00534865	0.16906	0.0015027	0.00477275	-0.788152
WBGene00000890	sig-7	50.3025	51.6995	48.8878	53.4653	52.427	49.588	48.4334	50.863	51.7733	56.6435	54.6255	51.594	58.5407	58.1397	62.2158	58.1985	55.8802	54.28	51.9212	52.3416	51.2767	57.1081	58.2583	64.0048	50.5809	53.5035	57.2085	sig-7	0.0445484	0.00107066	0.108199	0.244999	0.156061	0.0443231	0.245068	0.094892	0.360757	0.449412	0.982306	0.993903	0.0322721	0.0702843	0.363671	0.508607	0.1368	0.00744215	0.0194614	1.26434
WBGene00000891	cyn-15	74.6374	76.8396	77.649	75.5531	74.0558	76.4961	76.4139	79.4369	79.0128	76.903	78.6703	77.522	75.5531	76.2311	77.281	75.8392	77.8515	77.3617	79.6149	77.5338	76.7364	77.9065	75.158	84.2336	75.9077	77.2001	76.3191	cyn-15	-0.0186635	0.0358135	0.0251948	-0.000105228	0.0131981	0.030673	0.0465942	0.00250243	0.581271	0.660457	0.288975	0.538113	0.459173	0.582502	0.365574	0.510281	-0.0253001	0.459795	0.578721	-1.00418
WBGene00000892	cyn-16	39.2986	41.3697	38.1759	37.7737	34.7377	40.2444	37.4641	44.3001	44.5802	41.6277	45.0925	45.0978	44.6905	47.9695	46.6018	43.5783	45.2857	44.1863	43.145	46.8892	43.2266	47.0033	48.2914	48.757	43.2707	44.0587	45.9447	cyn-16	-0.0766725	0.0835581	0.151111	0.230111	0.165223	0.163994	0.278302	0.166455	0.191975	0.266488	0.14683	0.363403	0.0122845	0.0309555	0.00666083	0.0218138	0.079	0.167591	0.264784	0.522794
WBGene00000893	cyn-17	1.64279	1.74784	2.01582	1.74784	2.64742	1.70285	1.80196	1.56669	2.02585	2.10828	1.64162	2.24082	1.96439	2.50403	2.24082	3.10979	2.13118	2.12392	2.06007	2.17305	1.70904	1.60137	2.16391	2.18328	1.98215	1.97511	1.92566	cyn-17	0.140958	-0.0111998	0.148511	0.315476	0.408284	0.135689	0.119474	0.13051	0.428768	0.518227	0.950377	0.979096	0.412368	0.537778	0.448061	0.590804	0.166965	0.343117	0.463188	1.12426
WBGene00000894	dab-1	321.656	310.96	319.598	338.233	343.088	341.501	323.845	323.845	317.807	325.582	313.526	308.124	365.76	368.997	366.668	327.597	322.05	314.865	308.124	303.499	310.467	343.718	340.731	333.815	311.721	315.799	322.05	dab-1	0.102782	0.0199409	-0.00861541	0.209847	0.0173763	-0.0464776	0.0969045	-0.00441229	0.000236501	0.000725289	0.421632	0.659326	0.729839	0.811155	0.0696861	0.146817	0.218462	1.08469e-09	1.19076e-08	-25.3572
WBGene00000895	dac-1	2.02224	2.06303	1.98377	1.64512	1.52738	1.302	1.90174	2.2947	1.98982	2.36751	2.26852	2.02224	1.59382	1.73029	1.57111	2.46813	2.21743	2.02485	2.02485	1.79789	2.47288	2.10436	2.02341	1.6095	1.70091	2.645	2.35137	dac-1	-0.43582	0.0253204	0.126343	-0.30732	0.129586	0.0439037	-0.0746971	0.119722	0.0125836	0.025453	0.863398	0.937692	0.397061	0.522405	0.767868	0.850643	-0.433663	0.0102928	0.0256389	-3.43242
WBGene00000896	dad-1	107.814	99.4838	103.51	96.8209	94.9014	100.544	109.996	85.4934	86.8638	82.6961	83.4242	82.17	81.7813	81.9298	76.0719	81.488	88.8845	87.9434	87.1962	80.4136	88.2719	81.8424	81.8424	72.587	92.744	88.5262	85.6421	dad-1	-0.0892845	-0.146596	-0.323691	-0.373769	-0.2653	-0.280067	-0.39355	-0.220172	0.159603	0.228059	0.0247051	0.121476	2.0569e-05	0.000122294	0.000119533	0.00075461	-0.0500771	0.448831	0.568304	0.154706
WBGene00000897	daf-1	30.0364	31.3716	29.5044	33.6327	32.8632	32.7041	30.3599	34.0154	32.6717	32.0156	31.5453	31.9153	40.4407	40.0023	39.5135	33.4804	30.5004	33.3793	31.5689	33.3221	32.7649	36.6787	38.3486	35.1544	33.601	34.1392	33.4178	daf-1	0.127985	0.0935722	0.0721348	0.401568	0.0979481	0.102672	0.280389	0.155552	0.00756535	0.0162931	0.0438351	0.172259	0.121768	0.208494	0.029118	0.0733099	0.329434	3.5663e-08	2.98199e-07	4.56692
WBGene00000898	daf-2	98.6305	99.1287	90.1268	108.104	106.389	108.752	87.8119	132.581	140.347	149.109	149.993	154.636	168.851	169.888	173.739	154.278	151.249	150.061	131.903	140.75	138.333	161.698	163.654	171.577	140.877	137.941	139.597	daf-2	0.168628	0.29366	0.658382	0.833588	0.663328	0.513692	0.787724	0.541146	0.0689861	0.111232	0.00242137	0.0288224	2.98075e-08	4.17137e-07	2.49978e-06	3.04018e-05	0.175206	0.0444503	0.0894621	0.266116
WBGene00000899	daf-3	26.9845	23.8834	24.7345	19.4073	20.7476	21.5766	24.5448	27.2888	29.0797	23.5436	23.1633	24.2861	24.2743	22.8248	22.4861	23.3482	25.7459	24.2743	24.3609	23.5836	25.7459	24.8311	25.0383	23.3636	24.643	25.199	24.4803	daf-3	-0.297319	0.0909042	-0.0904236	-0.120285	-0.0426351	-0.0379742	-0.044278	-0.0251949	2.63637e-05	9.9082e-05	0.115169	0.314155	0.132352	0.222793	0.513249	0.647508	-0.0298617	0.619672	0.722465	0.330243
WBGene00000900	daf-4	41.6886	41.2435	43.852	42.3131	41.7486	43.1542	39.3597	41.7831	44.1741	46.3012	46.2142	48.5613	52.6331	50.258	48.94	46.0626	48.3697	52.0126	45.457	45.0138	45.1614	47.3487	48.8878	45.9447	47.0966	47.6516	45.7185	daf-4	0.0051009	-0.0197517	0.155171	0.260231	0.210355	0.0979257	0.167075	0.148071	0.910394	0.933342	0.662173	0.829364	0.00166309	0.00553738	0.0363438	0.0875791	0.105059	0.0238227	0.0524704	0.677054
WBGene00000901	daf-5	28.7409	28.835	31.3422	21.7055	22.7806	24.1288	32.6314	31.5234	31.2776	25.3297	24.7716	27.9433	23.366	22.4312	21.8054	28.3567	27.8922	29.0587	26.3511	28.0742	27.1747	21.8188	22.5688	20.6486	32.9023	32.8927	30.9771	daf-5	-0.376543	0.10352	-0.185771	-0.393591	-0.0579679	-0.124887	-0.447284	0.123097	5.21734e-08	3.27702e-07	0.0392396	0.160915	0.000999828	0.00354367	0.0178174	0.0489781	-0.207821	0.000520076	0.0018577	1.11869
WBGene00000902	daf-6	1.38094	2.10641	1.74784	1.27024	1.24867	1.43994	1.4949	2.09413	2.28615	1.68997	1.75873	1.56801	1.84394	2.29126	1.86386	1.37082	1.97511	2.29126	2.2097	2.40449	1.77411	1.77533	1.49815	1.3772	2.05958	1.80885	1.99152	daf-6	-0.372417	0.168497	-0.0311129	0.227674	0.140797	0.308899	-0.133101	0.193588	0.0709195	0.114016	0.345033	0.590248	0.869155	0.913607	0.086532	0.173255	0.258787	0.171514	0.269369	-8.31767
WBGene00000903	daf-7	2.819	3.31485	3.12229	3.27753	3.50891	3.89605	3.4441	3.01094	3.13819	3.36469	3.15256	3.29092	3.59914	3.7986	3.52604	2.73936	3.14301	3.25111	3.51615	2.88371	2.78963	3.65193	3.15806	2.68369	3.59145	2.93569	2.72942	daf-7	0.204896	0.0584955	0.092362	0.24698	-0.00375168	0.000606498	0.0479661	-0.000789796	0.0855282	0.13395	0.619824	0.804099	0.443875	0.568536	0.995986	0.997422	0.154618	0.195513	0.29964	1.67404
WBGene00000904	daf-8	10.7113	12.4926	10.2668	12.107	11.9096	12.0674	12.6164	12.9783	14.4772	12.88	11.4241	12.1471	15.4138	14.0396	14.621	13.7488	12.0097	13.6609	12.1694	12.5014	11.5859	13.9785	14.0646	14.4772	12.233	12.5758	12.339	daf-8	0.117811	0.263352	0.130124	0.405502	0.240842	0.123191	0.352697	0.159852	0.103105	0.157432	0.000598105	0.0138867	0.0760743	0.142908	0.0892566	0.177562	0.275378	0.000384899	0.00141802	2.11628
WBGene00000905	daf-9	1.64279	1.67496	1.67735	2.43251	2.76305	2.58179	1.63369	1.36565	1.38094	1.4621	2.33558	1.99103	3.34337	2.69708	2.85849	1.73755	1.91524	1.48195	2.15096	1.25552	1.98548	2.26852	2.9888	3.06777	1.94998	1.55997	1.85052	daf-9	0.632513	-0.190554	0.19022	0.827347	0.0255899	0.0945867	0.716086	0.0940439	0.000814999	0.00221469	0.322749	0.569777	0.302452	0.425111	0.607995	0.72806	0.637127	0.000712995	0.00245833	3.34942
WBGene00000906	daf-10	1.25092	1.25609	0.722322	0.992178	0.898	1.32981	1.22204	0.942246	1.34248	1.43259	1.18521	1.15263	1.29609	1.07359	1.86386	1.1191	1.27895	1.10134	1.19059	1.4085	1.44902	1.60137	1.2149	1.33114	1.39319	1.01361	1.43306	daf-10	0.0136104	0.142306	0.257727	0.386663	0.159044	0.360502	0.399134	0.277748	0.953436	0.966064	0.529479	0.738769	0.261303	0.379673	0.110643	0.20969	0.128936	0.552672	0.66378	0.50028
WBGene00000907	daf-11	0.760427	0.519484	0.280548	0.514968	0.917178	0.423735	0.682401	0.907391	0.525336	0.412165	0.534617	0.87529	0.896232	0.729335	0.542482	0.511421	0.476665	0.381028	0.59979	0.28854	0.698364	0.742306	0.654265	0.75067	0.513777	0.814351	0.386511	daf-11	0.260145	0.510893	0.278318	0.548724	-0.107191	0.0582683	0.551522	0.175184	0.489799	0.576661	0.16491	0.389658	0.467554	0.590717	0.881604	0.926805	0.270406	0.451175	0.570771	0.97157
WBGene00000908	daf-12	24.3904	24.4244	22.0666	17.3847	17.1885	15.9793	22.0861	30.2597	29.261	29.007	29.7848	29.8815	22.7009	23.3397	21.6876	27.2888	27.9238	30.3672	27.3601	27.2712	28.6583	20.5331	19.3064	21.2326	28.3689	27.3218	28.2703	daf-12	-0.48489	0.187921	0.32507	-0.0632038	0.275931	0.233789	-0.217057	0.24548	1.92202e-06	9.05582e-06	0.0160151	0.0932084	0.000131362	0.000611955	0.00359151	0.0130876	-0.388274	1.62271e-05	8.15441e-05	-1.19443
WBGene00000910	daf-14	7.36688	7.18008	7.0867	8.26236	6.93721	8.0595	7.44254	6.26952	6.11015	5.51388	6.18076	6.20287	6.99968	6.90887	8.32236	7.32466	8.15983	8.3551	6.63024	6.38864	5.40252	7.48754	5.6805	7.18181	6.3679	6.92987	6.48395	daf-14	0.10402	-0.128277	-0.272509	0.029003	0.144234	-0.233761	-0.103386	-0.129492	0.28935	0.374674	0.205084	0.440802	0.0143289	0.0353212	0.0297267	0.0745897	0.301512	0.00758466	0.0197773	-1.10643
WBGene00000911	daf-15	189.798	183.772	172.942	185.648	178.512	181.447	179.403	204.406	208.564	213.617	207.059	208.979	214.54	206.969	222.647	202.64	206.758	202.2	202.28	201.083	207.149	216.745	209.547	222.848	196.829	197.741	201.864	daf-15	-0.00133711	0.112808	0.204837	0.236662	0.163062	0.160397	0.247629	0.126709	0.974354	0.981588	0.00993012	0.0684215	2.68466e-05	0.000153673	0.00050848	0.00255151	0.0318255	0.439681	0.559984	0.15537
WBGene00000912	daf-16	94.9675	92.1241	92.4756	91.876	91.2609	93.4959	85.1126	114.632	110.804	121.9	117.83	121.828	114.277	118.857	112.614	115.012	114.594	120.799	109.111	108.167	108.515	109.111	110.838	105.414	107.271	110.89	110.014	daf-16	-0.015641	0.137316	0.370803	0.306344	0.326081	0.220648	0.21938	0.230881	0.797683	0.844344	0.0286374	0.133158	8.77627e-07	7.9758e-06	0.00090751	0.00417276	-0.0644592	0.279024	0.395161	-0.173837
WBGene00000913	daf-18	489.674	479.72	469.092	573.828	557.752	561.556	470.283	520.472	533.041	593.437	567.275	579.164	708.318	708.318	722.387	581.049	589.152	570.408	534.837	547.912	540.35	675.083	671.732	754.126	551.315	540.35	586.003	daf-18	0.235485	0.0801866	0.27419	0.57233	0.274731	0.173828	0.542408	0.220835	1.6711e-06	7.99065e-06	0.0507765	0.18956	1.25952e-07	1.47687e-06	0.000130369	0.000809191	0.29814	1.64286e-08	1.4624e-07	1.08735
WBGene00000914	daf-19	28.1278	27.8044	27.2331	26.974	28.8862	27.8118	25.5225	28.4378	28.3843	27.8118	27.4032	29.3626	34.9578	36.5098	35.8299	31.3716	32.3581	31.7585	27.6531	27.3979	28.2612	35.7867	32.9936	29.4551	28.3689	30.2544	29.6441	daf-19	0.00658921	-0.0174166	0.0254087	0.367049	0.199786	0.00259063	0.241589	0.0853594	0.901657	0.926441	0.742997	0.874111	0.637356	0.736703	0.961334	0.977909	0.34164	3.90358e-07	2.69879e-06	13.4458
WBGene00000915	daf-21	3211	3211	3211	3099.01	3099.01	2935.44	3211	3371.65	3371.65	4273.71	4273.71	4273.71	4273.71	3950.23	3371.65	4273.71	4273.71	4273.71	3371.65	3211	3371.65	4273.71	4273.71	3950.23	3371.65	3371.65	3371.65	daf-21	-0.0768316	0.0467194	0.412418	0.262049	0.412401	0.0475055	0.37586	0.0704193	0.108244	0.163966	0.317529	0.564781	7.29757e-10	1.46347e-08	0.311285	0.453988	-0.150369	0.0024045	0.00722599	-0.364603
WBGene00000917	daf-25	33.5774	32.9936	33.3081	34.5306	35.4117	35.378	32.3462	29.8752	26.9273	29.9052	31.7372	33.6916	33.787	35.4117	31.7372	29.4213	30.5004	31.7585	30.4523	31.9557	31.3562	33.0139	33.5694	35.4241	31.1765	31.7005	30.1033	daf-25	0.0754169	-0.164712	-0.066528	0.0153339	-0.121253	-0.0928508	0.0275223	-0.103367	0.154502	0.221846	0.00405617	0.03931	0.219693	0.332022	0.0886359	0.17659	0.0818619	0.135838	0.22424	-1.23049
WBGene00000920	daf-28	4.66523	5.16976	5.24362	7.05273	8.06494	7.64769	5.40131	3.26601	3.09893	4.56055	3.67767	3.73407	5.68929	4.76646	4.73237	3.14301	3.18233	3.68972	4.16073	3.53424	4.34588	5.6634	5.18297	3.97304	4.7625	3.97304	3.27372	daf-28	0.5896	-0.386878	-0.334292	0.0119678	-0.575541	-0.316503	-0.0173497	-0.335724	0.000143583	0.0004605	0.0182142	0.101322	0.0423747	0.0882083	0.0496849	0.112738	0.34626	0.0370564	0.0765594	-1.0358
WBGene00000923	daf-31	83.8141	83.3832	87.5731	75.5901	76.4365	75.5184	89.1299	77.9065	75.3998	77.0516	82.9517	76.1797	66.5559	66.4041	67.4974	75.4908	73.9576	75.2775	74.1111	76.2894	78.6703	68.0653	66.4041	66.5169	77.6758	79.9842	74.1846	daf-31	-0.162912	-0.0735673	-0.110893	-0.345903	-0.181033	-0.154354	-0.341631	-0.136093	0.000876696	0.00236606	0.100002	0.28811	0.0174761	0.0418805	0.00147125	0.00622773	-0.235011	1.60193e-05	8.06398e-05	2.11927
WBGene00000928	dao-2	22.4014	20.5424	22.4734	56.0493	63.2655	55.6274	20.195	16.4854	17.2122	16.4138	21.8241	18.3432	31.1765	34.6537	35.2744	17.0529	19.7203	17.6683	17.0026	16.2282	16.7034	24.5807	26.3511	24.8782	15.1143	16.2491	17.0345	dao-2	1.41362	-0.283899	-0.22034	0.623895	-0.265228	-0.388587	0.212585	-0.437124	7.05891e-18	2.3087e-16	0.00195949	0.0253958	0.0141745	0.034967	9.57303e-05	0.000629515	0.844236	3.99095e-11	5.62588e-10	-3.83151
WBGene00000929	dao-3	36.2099	37.9222	37.966	27.4741	27.6041	30.5507	36.027	36.4255	36.5876	26.737	25.3698	26.8037	29.0017	26.7329	28.8549	31.2776	30.3419	31.3263	27.7899	30.4803	28.7653	26.2883	29.9301	27.3519	37.4991	35.3265	35.2781	dao-3	-0.391607	-0.0390478	-0.505703	-0.407498	-0.269868	-0.36805	-0.424102	-0.0517655	8.51379e-09	6.09477e-08	0.404589	0.64636	7.42929e-11	1.84584e-09	2.78056e-08	7.04963e-07	0.098205	0.0695382	0.129523	-0.194195
WBGene00000930	dao-4	3.20207	2.77091	3.66544	2.52916	3.56435	2.8657	3.79744	4.04917	3.56308	4.80033	5.11718	3.75996	4.24262	3.23126	3.33787	2.5882	3.623	3.13703	4.21355	3.57428	4.30087	3.50405	3.29092	3.41621	2.77192	3.27753	2.92188	dao-4	-0.125711	0.249067	0.487454	0.16104	-0.0385687	0.332225	0.087828	-0.100568	0.398341	0.487525	0.0794716	0.251171	0.00118702	0.00412961	0.0217734	0.0579788	-0.326414	0.0207018	0.0466618	-0.66963
WBGene00000931	dao-5	224.823	224.528	226.593	193.728	190.498	193.275	221.182	204.958	206.592	195.643	184.484	188.065	167.179	168.4	157.308	172.274	176.625	176.777	194.711	200.273	196.144	178.242	181.785	169.215	190.926	186.689	180.644	dao-5	-0.226874	-0.0957463	-0.250984	-0.45549	-0.362121	-0.193839	-0.352166	-0.276138	1.29366e-07	7.61077e-07	0.00585384	0.0492795	2.20781e-08	3.1926e-07	1.89777e-06	2.43057e-05	-0.204506	1.42894e-06	8.8916e-06	0.814817
WBGene00000932	dao-6	0.404605	0.269248	0.413184	0.423735	0.513777	0.599235	0.248825	0.341222	0.201717	0.342374	0.140385	0.439527	0.623883	0.548838	0.628795	0.350966	0.253557	0.334011	0.416662	0.174276	0.44667	0.525336	0.269248	0.306282	0.222487	0.312325	0.347299	dao-6	0.480675	-0.458528	-0.344723	0.728856	-0.212578	-0.135927	-0.0168986	-0.30857	0.157918	0.225967	0.243612	0.487262	0.383067	0.508455	0.714284	0.811485	1.07358	0.00820753	0.0211515	-3.11432
WBGene00000933	dap-3	53.2822	59.0551	55.6101	49.8494	50.2129	46.743	52.427	59.9165	61.4941	66.2617	68.3311	66.7985	54.4251	55.546	56.2596	53.5223	53.4085	55.9435	66.6606	66.9896	66.9896	53.0579	53.6344	55.8419	57.5702	57.4122	57.4122	dap-3	-0.191234	0.0474732	0.26471	-0.0123529	-0.0405318	0.259478	-0.0463791	0.0406639	0.000264333	0.000802143	0.295837	0.544317	1.90038e-06	1.56195e-05	2.39895e-06	2.95061e-05	-0.277063	1.03146e-06	6.61012e-06	-1.04667
WBGene00000934	dat-1	1.32637	1.44534	1.67735	1.67172	1.38094	1.15771	1.22204	1.04747	1.60137	1.59382	1.52494	1.80048	1.76935	1.49699	1.69529	1.40786	1.63246	1.53769	1.67735	1.76151	1.44902	1.85114	1.83989	2.09289	1.22091	1.65808	1.46724	dat-1	-0.0712324	-0.225304	0.156605	0.160962	0.0547704	0.140095	0.378308	-0.0339609	0.666106	0.733933	0.184549	0.415217	0.332227	0.456795	0.379557	0.524405	0.00435715	0.978042	0.986906	0.0278226
WBGene00000935	daz-1	299.357	299.357	301.743	339.385	331.857	331.391	301.743	293.811	286.29	303.982	289.617	316.587	343.718	347.24	346.03	287.884	299.357	289.617	306.04	291.982	300.706	328.317	335.096	341.501	291.251	287.884	295.57	daz-1	0.155363	-0.0299859	0.0153966	0.203646	-0.038198	-0.00235584	0.157674	-0.0420239	7.13639e-06	2.99366e-05	0.301828	0.549749	0.595605	0.702137	0.934908	0.961084	0.18825	3.50108e-07	2.43798e-06	12.2267
WBGene00000936	dbl-1	5.3207	5.41918	5.15394	4.60991	4.84867	4.93994	5.33444	5.45026	5.14818	5.25823	5.76559	5.67143	5.45499	5.21504	4.77091	5.11951	5.8954	6.39698	4.78151	5.91981	5.11254	4.42398	4.45024	3.52341	4.26071	4.56923	4.93994	dbl-1	-0.14391	0.0056607	0.0723688	-0.0398697	0.138267	-0.0194989	-0.350311	-0.208623	0.136488	0.199729	0.950642	0.979113	0.437374	0.562199	0.833639	0.89657	-0.112238	0.239558	0.351623	-1.55092
WBGene00000937	dbr-1	46.4096	46.8151	45.4259	44.4187	45.7489	44.2098	46.5424	42.5185	45.7283	46.1884	45.4259	44.5605	49.9752	48.2286	48.3566	47.9282	44.9622	44.2263	42.5913	45.1771	46.2579	44.0384	47.6764	50.4005	46.2313	44.5268	45.4333	dbr-1	-0.0456709	-0.0422351	-0.0268929	0.080264	-0.0198215	-0.0516108	0.03	-0.0259095	0.306613	0.392724	0.340539	0.586255	0.547587	0.661976	0.250005	0.388231	0.107157	0.0219342	0.0490064	-3.98457
WBGene00000938	dcp-66	95.2985	93.0722	87.7965	88.0022	88.0819	88.349	90.5372	117.681	118.641	113.91	112.59	111.954	116.327	118.519	111.317	111.838	115.212	113.168	115.36	109.506	115.977	118.986	113.041	122.183	115.36	112.286	116.822	dcp-66	-0.0621603	0.230762	0.293791	0.326677	0.301807	0.304439	0.357594	0.319087	0.315731	0.402061	0.000564908	0.0135275	3.38346e-05	0.000188197	1.92902e-05	0.000164544	0.0328852	0.580552	0.688821	0.111934
WBGene00000939	dcr-1	204.567	204.248	190.498	228.02	222.382	215.688	194.868	224.31	236.231	236.817	236.584	234.426	248.214	248.538	252.127	243.683	239.909	238.773	240.019	241.472	233.967	253.767	256.517	275.09	235.381	223.838	239.577	dcr-1	0.153515	0.123738	0.240743	0.322102	0.269764	0.256248	0.388501	0.22156	0.00191856	0.00479556	0.00996615	0.0684285	9.93707e-06	6.50743e-05	3.58445e-06	4.09547e-05	0.081359	0.0768546	0.140839	0.33795
WBGene00000940	dcs-1	42.4867	44.6101	46.6924	50.0631	47.6024	49.5489	43.5	40.8063	42.3294	40.3231	40.9618	41.9033	44.6101	44.3808	44.2098	42.2738	41.5248	39.7432	39.5135	40.8564	39.5777	44.6183	40.6818	44.0384	40.4948	38.0512	40.8149	dcs-1	0.140338	-0.0780192	-0.116884	-0.00441924	-0.115785	-0.156819	-0.0497587	-0.164019	0.00186115	0.0046628	0.0704605	0.232729	0.010105	0.0262048	0.000887834	0.00409971	0.112464	0.0135104	0.032319	-0.962191
WBGene00000941	ddp-1	55.5871	55.2226	58.7211	48.3632	47.8728	49.3389	56.3454	36.5314	37.7585	51.6995	52.7326	51.6924	40.058	39.856	34.8915	34.7497	36.5477	39.9015	51.9212	49.9752	50.734	40.6267	36.8117	34.4969	43.7834	43.9816	39.5672	ddp-1	-0.218771	-0.399562	-0.117867	-0.560719	-0.603394	-0.149607	-0.594913	-0.41248	0.0194765	0.0372808	0.00011818	0.0063908	0.191994	0.298643	0.0993645	0.193092	-0.442853	5.58436e-05	0.000250668	3.75724
WBGene00000942	deb-1	84.1211	82.2319	80.365	63.4293	69.3541	66.2888	79.7267	100.946	100.07	98.0295	95.9147	97.8793	84.5282	81.2657	84.3476	94.2006	90.6421	92.7771	95.8612	100.846	100.567	77.4238	77.741	79.3397	87.005	91.3935	86.3253	deb-1	-0.312513	0.176374	0.242267	0.0192314	0.169442	0.267589	-0.0743297	0.101435	5.67168e-06	2.4285e-05	0.0027107	0.0307691	0.000110056	0.000524517	2.77307e-05	0.000221527	-0.223036	0.000304981	0.00115194	-0.920619
WBGene00000950	deg-1	3.36725	3.89064	3.79681	3.59791	3.76454	3.38554	2.95636	3.54146	4.12571	3.8272	4.58683	4.46757	3.63463	4.01966	3.85935	5.04432	4.69479	5.49677	4.60053	4.35207	4.60396	3.80135	4.88589	4.43669	4.35587	3.92301	4.14112	deg-1	-0.0346465	-0.0717642	0.225547	0.0647642	0.470299	0.302947	0.246035	0.173321	0.759598	0.813212	0.524903	0.735635	0.0477926	0.0976143	0.00825828	0.0259822	-0.160782	0.152568	0.24603	-0.712857
WBGene00000951	deg-3	1.7453	2.21852	2.53023	2.80437	2.51926	2.9225	2.10713	2.15933	2.50531	1.98548	2.68225	2.70546	3.13587	3.48216	2.92065	2.83414	2.46225	2.61438	2.29954	2.36751	2.02341	2.42501	2.95636	2.87688	2.02119	2.39763	2.55492	deg-3	0.367882	0.0747283	0.198983	0.580308	0.300907	0.0636801	0.361961	0.119451	0.0128152	0.0258523	0.605488	0.793668	0.177732	0.280683	0.664526	0.77388	0.381325	0.00898282	0.022801	1.91637
WBGene00000952	del-1	1.22091	0.965141	1.02375	1.01645	1.30022	1.302	1.15263	0.976111	0.786693	2.32367	2.13118	1.82806	1.0212	0.877423	1.18521	1.07869	0.879465	0.94589	1.32684	1.06164	1.24336	1.15628	0.939661	1.57111	1.04747	0.949999	1.21588	del-1	0.150689	-0.148572	0.961357	-0.0785021	-0.163182	0.181422	0.132301	-0.00930196	0.424737	0.513963	0.452926	0.685487	5.47401e-06	3.91868e-05	0.338108	0.481661	-1.03986	3.07903e-06	1.79979e-05	-1.08166
WBGene00000953	del-2	0.84371	0.707884	1.02375	0.541228	0.814351	0.719389	0.781823	1.12004	0.59979	1.1227	1.00081	1.12127	0.623883	0.651577	0.431352	0.893399	0.75067	0.772963	1.39319	0.907391	1.28112	0.525336	0.786693	1.03316	1.04747	0.979768	1.24967	del-2	-0.339622	-0.0634802	0.343884	-0.593657	-0.0951481	0.480173	-0.204358	0.347291	0.192267	0.266744	0.791246	0.902567	0.140204	0.233046	0.0380594	0.0910687	-0.937541	0.00156135	0.00493286	-2.72633
WBGene00000955	des-2	2.62147	2.65996	2.21743	2.92188	2.51926	2.8391	2.59059	2.78909	2.59266	3.12004	3.25362	3.63034	3.63463	4.09664	3.15256	3.75996	2.85201	3.16076	3.08322	2.84632	3.00825	3.73686	3.63034	3.71384	3.62713	2.5543	2.55492	des-2	0.14961	0.0938971	0.422627	0.53997	0.365633	0.26075	0.567627	0.205013	0.274693	0.358934	0.489593	0.71302	0.00311745	0.00957903	0.0585922	0.12798	0.117343	0.344734	0.464865	0.277651
WBGene00000958	dgk-1	8.25755	8.8531	8.01607	7.14372	6.19797	7.28082	8.1053	8.36403	8.82325	8.12013	7.55893	7.39243	7.79761	9.43586	8.66635	7.79761	8.97416	8.79733	8.30368	9.02439	7.79761	7.91427	7.86794	7.95108	8.45043	7.29573	7.00656	dgk-1	-0.282885	0.00973216	-0.12296	0.0431572	0.0323471	-0.00161117	-0.0794004	-0.144353	0.00242104	0.00590288	0.904049	0.957512	0.153145	0.249734	0.98428	0.991661	0.166117	0.0581167	0.11193	-1.35098
WBGene00000959	dgk-2	25.2743	26.2883	25.9906	24.8341	25.9455	27.5155	28.2514	25.626	25.6459	26.0414	27.4879	27.8656	26.1222	25.313	26.2512	27.482	26.8572	28.847	24.4063	24.895	25.7108	21.8012	23.1173	23.9887	26.3033	26.8704	25.7519	dgk-2	0.0108086	0.0368682	0.0711793	0.00271638	0.103002	-0.0483814	-0.173597	0.0264625	0.823268	0.865216	0.443733	0.678372	0.150273	0.246067	0.326001	0.469943	-0.0684629	0.169253	0.266661	-0.961838
WBGene00000960	dgk-3	0.456068	0.371314	0.784105	0.514968	0.513777	0.392683	0.248825	0.176446	0.44916	0.513777	0.374786	0.973362	0.345064	0.468998	0.571235	0.350966	0.721714	0.663592	0.355563	0.479036	0.37194	0.707884	0.341222	0.513777	0.363901	0.343787	0.314909	dgk-3	-0.113616	-0.930725	0.191031	-0.185481	0.149457	-0.366173	-0.0380497	-0.580845	0.749321	0.80484	0.0344636	0.148408	0.577909	0.687764	0.332819	0.476432	-0.376513	0.297784	0.415524	-1.97095
WBGene00000961	dgn-1	40.2098	41.1154	39.2504	28.7516	29.3573	31.9618	40.4685	46.8562	46.5516	47.5848	47.6834	47.1054	40.4597	41.1639	41.3873	46.677	50.0305	48.4798	47.9805	49.588	53.0579	38.8209	38.1692	35.4241	49.7575	51.8223	47.7325	dgn-1	-0.423917	0.147017	0.240164	0.0292733	0.269749	0.319225	-0.0984993	0.308786	1.67124e-08	1.13777e-07	0.00706279	0.0557402	5.84589e-05	0.00030234	6.68602e-07	1.0358e-05	-0.21089	0.000297402	0.00112847	-0.878111
WBGene00000962	dhc-1	551.315	543.603	485.15	675.083	644.345	647.346	489.674	711.133	784.733	825.029	815.066	811.642	1081.89	1119.38	1159.64	961.017	967.183	921.334	719.748	750.453	761.271	1037.75	996.872	1143.28	761.271	767.504	828.918	dhc-1	0.318551	0.300274	0.636137	1.0907	0.85242	0.499377	1.00621	0.578615	0.00148999	0.0038183	0.00246254	0.029113	9.44287e-08	1.14728e-06	5.83438e-06	6.17087e-05	0.454563	1.08301e-05	5.66015e-05	0.714568
WBGene00000963	dhp-1	15.4214	15.1851	14.3992	19.0435	19.9598	19.4323	15.591	18.1313	17.4006	18.534	20.6743	18.8563	22.2843	23.3397	22.7903	18.9418	19.9787	19.95	17.599	17.1302	17.5924	20.8993	18.5243	21.2794	17.3425	17.5726	18.7588	dhp-1	0.375724	0.180339	0.365268	0.604812	0.389927	0.218289	0.425653	0.253173	6.86312e-07	3.53895e-06	0.00551858	0.0476169	1.3118e-06	1.12615e-05	0.00113894	0.00502028	0.239545	0.000214673	0.000840257	0.655806
WBGene00000964	dhp-2	10.2826	11.2642	10.2668	16.031	16.0219	15.467	10.5597	11.1942	10.6993	14.8544	13.7504	14.1716	12.8387	14.2178	13.0452	15.024	14.6797	14.7644	11.5005	12.172	11.6621	13.8528	15.0075	14.745	11.7159	11.2469	10.8256	dhp-2	0.583415	0.0322945	0.429979	0.337716	0.486053	0.152857	0.45697	0.0902154	2.54405e-11	2.70892e-10	0.583965	0.777263	2.6118e-08	3.72101e-07	0.0133949	0.0386171	-0.0922632	0.102415	0.178542	-0.214576
WBGene00000965	dhs-1	56.2241	54.0272	56.7588	58.4211	58.9968	54.9503	58.7599	56.088	54.5132	55.2638	53.944	54.9408	59.3655	58.523	62.3797	56.1282	54.18	53.2398	53.565	52.003	55.2226	56.171	60.5077	58.9335	53.8076	54.5062	56.5075	dhs-1	0.0452355	0.0200996	-0.0252291	0.108419	-0.0326419	-0.0550562	0.0712166	-0.0198975	0.256043	0.338797	0.609247	0.796986	0.529331	0.645432	0.17359	0.295546	0.133648	0.00212886	0.00649354	-5.29738
WBGene00000966	dhs-2	11.8966	13.4937	11.5584	5.58947	5.86966	6.28435	13.2833	14.2648	11.9583	6.62495	6.5222	6.45641	4.41827	3.55572	4.63992	4.01807	5.00708	4.11932	12.3317	10.9113	13.0276	4.74808	4.54578	4.66523	11.1471	10.7676	11.6621	dhs-2	-1.05786	0.1029	-0.909237	-1.55988	-1.48891	-0.0209915	-1.39946	-0.133182	6.55048e-12	7.70732e-11	0.178333	0.407943	1.44582e-10	3.38404e-09	0.786067	0.863457	-0.650648	2.66966e-06	1.58185e-05	0.715597
WBGene00000967	dhs-3	72.6318	70.1088	72.2163	34.8175	32.3581	32.7749	66.7468	67.9837	70.9932	23.6609	24.2245	22.7387	22.904	22.7758	22.8399	40.4458	39.2504	39.3339	42.1152	42.2002	43.3994	30.0315	29.6626	29.6255	50.7066	51.4728	50.9184	dhs-3	-1.10381	-0.0650633	-1.60823	-1.65	-0.854415	-0.751896	-1.26726	-0.489943	2.23438e-23	1.88371e-21	0.0452056	0.175634	1.63514e-26	1.09221e-23	1.81088e-19	4.42952e-17	-0.0417786	0.344061	0.464209	0.0259781
WBGene00000968	dhs-4	3.96985	4.26394	3.36469	3.1689	3.81059	2.79231	4.11461	3.75545	3.97304	2.17851	1.6095	2.06303	3.4441	3.21424	4.0269	2.26852	2.18583	2.02485	2.15096	1.83858	2.4346	3.13111	3.01479	3.27637	2.20087	2.82008	2.14845	dhs-4	-0.251825	0.0379187	-0.989983	-0.121826	-0.841415	-0.850575	-0.296723	-0.69474	0.0476719	0.0807568	0.742067	0.873727	4.38549e-07	4.35465e-06	1.8546e-06	2.38588e-05	0.868156	4.04228e-06	2.30414e-05	-0.876941
WBGene00000969	dhs-5	7.36688	7.23015	6.5925	7.29573	7.27611	7.62136	6.66322	7.6419	6.88471	5.51388	5.71001	6.00548	5.68929	6.12695	6.49845	5.8954	5.34847	6.0828	6.63024	6.26269	5.86783	5.52685	5.2211	5.5018	6.26495	6.46646	6.75021	dhs-5	0.0667758	-0.000279382	-0.295484	-0.213224	-0.29069	-0.172997	-0.383117	-0.121029	0.357615	0.445883	0.996908	0.998979	0.00067607	0.00252393	0.0276225	0.0702349	0.0822596	0.310509	0.428529	-0.27839
WBGene00000970	dhs-6	71.9257	73.5038	70.1088	100.567	103.359	98.052	72.3814	79.536	77.772	82.6177	83.4242	83.9859	92.571	93.0043	99.9182	82.3706	81.488	79.5739	87.1259	85.4073	83.7539	102.672	96.4192	101.888	75.6584	73.5566	79.7902	dhs-6	0.486902	0.0907512	0.21491	0.404448	0.175152	0.250762	0.481106	0.0868236	3.74318e-13	5.28518e-12	0.0287117	0.133325	7.93836e-06	5.37278e-05	5.89874e-07	9.39848e-06	0.189537	3.49191e-05	0.000164347	0.881935
WBGene00000971	dhs-7	7.11471	7.23015	6.30804	4.43263	4.61939	3.92401	6.26952	7.98707	7.26174	1.75873	1.95853	2.37327	2.70419	2.47857	2.99919	0.893399	0.943338	1.01361	4.60053	4.87939	4.30087	3.94154	3.91765	4.17009	3.62713	2.85797	4.00899	dhs-7	-0.668902	0.0542979	-1.76073	-1.34221	-2.84961	-0.584042	-0.780722	-0.991626	7.89819e-07	4.02488e-06	0.556223	0.758475	3.82623e-12	1.21259e-10	5.23808e-06	5.64329e-05	0.418519	0.0122832	0.0298395	-0.237696
WBGene00000972	dhs-8	0.456068	0.559924	0.690435	0.992178	0.782896	0.62757	0.646365	0.47777	0.75067	0.814351	0.665602	0.698364	0.513777	0.573975	0.59979	0.312325	0.782896	0.628795	0.819985	0.479036	0.409693	0.44916	0.341222	0.911899	0.580219	0.917178	0.766279	dhs-8	0.511261	0.127532	0.370467	0.00666375	-0.00939093	-0.0067537	-0.146933	0.408453	0.100008	0.153432	0.687061	0.842966	0.240745	0.356621	0.983709	0.991416	-0.363803	0.25657	0.370734	-0.982013
WBGene00000973	dhs-9	25.4865	26.2883	25.912	60.0178	59.9449	57.1007	24.91	24.7892	24.9188	33.0435	34.2283	35.2413	40.9705	42.3066	43.0043	62.6735	60.7016	64.8637	28.2052	26.8093	27.828	39.6849	39.9571	37.5612	38.0672	39.6118	37.2484	dhs-9	1.18863	-0.0572684	0.40134	0.700288	1.27671	0.0946427	0.59543	0.565137	8.43523e-23	6.31443e-21	0.203865	0.439707	3.14913e-10	6.87936e-09	0.0386326	0.0921357	0.298948	3.81569e-08	3.16462e-07	0.744875
WBGene00000974	dhs-11	28.5963	30.1102	29.9864	25.9372	26.7923	27.4266	28.3251	23.2851	25.7519	22.0707	22.5208	21.9901	21.7055	20.3843	22.5844	21.3724	22.5688	23.2019	23.3719	24.43	24.2546	21.2035	22.9835	23.8906	25.0733	24.895	21.9184	dhs-11	-0.146735	-0.200522	-0.413301	-0.457747	-0.397944	-0.30038	-0.385779	-0.303645	0.0167367	0.0326701	0.00165147	0.0233559	2.13352e-07	2.31436e-06	2.14505e-05	0.000179274	-0.044446	0.491347	0.607131	0.107539
WBGene00000975	dhs-12	48.0261	47.4973	48.3346	52.9548	48.9571	50.4219	50.0755	37.0468	36.6851	37.6569	37.1495	39.1113	38.5939	39.975	36.5314	44.3983	43.0615	43.2991	38.6504	39.343	39.0776	36.6446	39.8906	38.524	42.3672	41.7547	41.9883	dhs-12	0.0834568	-0.228491	-0.335478	-0.32103	-0.138727	-0.297461	-0.322634	-0.189969	0.203517	0.279671	0.00167217	0.0235337	3.1728e-05	0.000178084	0.000123392	0.000774747	0.0144472	0.837932	0.891744	-0.0430645
WBGene00000976	dhs-13	67.8754	72.6318	76.2145	56.5838	58.2469	59.7297	69.8464	57.2428	61.0638	51.8895	51.1036	58.0151	54.2438	49.1349	47.9901	50.4478	49.2569	54.1628	52.4984	52.3416	54.0054	50.2938	52.711	41.0576	55.8802	59.5122	53.1405	dhs-13	-0.31027	-0.205231	-0.424873	-0.515374	-0.489845	-0.444877	-0.585197	-0.360526	0.000103674	0.000341911	0.0051462	0.0455329	1.59395e-06	1.33794e-05	6.63267e-07	1.0294e-05	-0.0905001	0.22733	0.337201	0.213005
WBGene00000977	dhs-14	16.7383	18.7131	17.5726	37.952	41.6886	39.1687	18.6879	17.3939	18.7653	14.9299	14.958	12.8432	28.1057	28.7897	28.4688	4.6781	4.49934	4.15059	22.2277	18.8688	20.556	38.0022	41.105	40.2282	13.7151	14.9448	14.2888	dhs-14	1.16654	0.0509754	-0.316449	0.692029	-2.00176	0.223587	1.17432	-0.301053	3.40012e-18	1.15332e-16	0.428804	0.665925	7.74808e-05	0.000386004	0.00133675	0.0057478	1.00848	3.97378e-15	1.15021e-13	-3.18685
WBGene00000978	dhs-15	1.07869	1.22091	1.15628	0.32204	0.371314	0.27634	1.4	1.15263	0.97068	1.18946	1.52494	1.20791	0.376178	0.287354	0.279805	0.736668	0.879465	1.41337	0.87529	1.33165	1.38094	0.377175	0.481012	0.513777	1.04747	1.40365	1.00664	dhs-15	-1.82656	0.0273824	0.175053	-1.86695	-0.201843	0.00968823	-1.33938	-0.00561595	1.53645e-05	6.03289e-05	0.89186	0.951579	0.386987	0.512627	0.962062	0.978227	-2.042	2.53518e-06	1.50731e-05	-11.665
WBGene00000979	dhs-16	0.671813	0.965141	1.08565	0.646365	0.648205	0.539892	1.60137	2.02224	2.06421	0.513777	0.899233	0.476665	0.513777	0.573975	0.404605	0.62757	0.594923	0.567005	0.571235	0.594923	0.34017	0.377175	0.409693	0.75067	1.00788	0.545169	0.386511	dhs-16	-0.538559	1.09921	-0.571581	-0.845442	-0.582164	-0.867527	-0.907838	-0.568362	0.0757668	0.120686	4.29027e-05	0.00416252	0.0675404	0.12961	0.0117891	0.034771	-0.273861	0.422313	0.544007	0.47913
WBGene00000980	dhs-17	14.9947	15.6729	15.406	13.7129	14.0309	15.799	15.591	15.445	15.484	15.2734	15.7199	16.9718	17.4877	17.3382	18.0763	16.3784	17.599	15.799	15.4958	16.1767	16.3211	17.3425	16.3343	15.6977	16.7189	16.9355	16.9574	dhs-17	-0.0864571	0.0152088	0.0604772	0.199614	0.110644	0.0581251	0.102659	0.136819	0.135914	0.199007	0.784529	0.898685	0.288473	0.410043	0.302302	0.444545	0.139137	0.0176951	0.0407465	2.30066
WBGene00000981	dhs-18	16.9926	16.5027	16.8211	19.4714	19.67	18.0331	16.5463	15.9218	15.6345	17.8187	17.7229	16.4391	9.54053	10.1165	9.5031	8.25349	8.45043	8.03086	16.2491	16.5426	17.0481	12.2985	12.8982	12.7321	10.8429	10.6607	10.6957	dhs-18	0.184011	-0.064913	0.0431629	-0.787137	-1.02636	-0.0154646	-0.409007	-0.644673	0.000428827	0.00124352	0.180282	0.410617	0.371215	0.496811	0.746643	0.836577	-0.8303	3.11089e-15	9.17264e-14	-19.2364
WBGene00000982	dhs-19	27.8414	28.466	27.0918	33.1134	35.098	33.4936	28.7196	32.7041	30.9211	24.6405	26.5926	25.0515	31.33	31.27	32.5765	24.6912	26.1442	25.2337	25.7181	25.2202	27.4324	31.7252	33.3871	36.8921	29.0365	26.737	28.3444	dhs-19	0.285709	0.14553	-0.129719	0.190434	-0.131464	-0.0901542	0.283599	0.01184	6.28906e-06	2.66786e-05	0.00919249	0.0652571	0.0250963	0.0571304	0.105981	0.202989	0.320153	2.37697e-06	1.41858e-05	-2.46806
WBGene00000983	dhs-20	14.3783	16.0583	14.1182	7.85773	9.1691	8.30808	16.0256	15.6345	16.5237	8.69282	8.42958	7.9694	3.53991	3.57672	3.62511	7.26174	7.87408	7.0166	12.1694	11.1512	11.0077	4.8151	4.79015	5.17491	10.1176	11.0029	10.0434	dhs-20	-0.818784	0.116601	-0.82893	-2.05372	-1.00802	-0.370175	-1.59687	-0.512151	9.59717e-13	1.28607e-11	0.0491267	0.185555	1.24543e-12	4.30866e-11	1.7767e-06	2.29925e-05	-1.22479	1.78992e-13	3.89056e-12	1.47756
WBGene00000984	dhs-21	27.9356	27.5626	25.6897	15.0946	16.7406	15.3311	25.3297	32.665	31.4903	28.1057	30.9634	29.4434	18.995	19.3533	18.4244	29.5861	28.8922	26.9171	25.9489	26.7017	25.8993	18.2644	16.2164	19.2457	26.5388	26.5724	29.7848	dhs-21	-0.789122	0.130143	0.123951	-0.516288	0.0687119	-0.0483286	-0.6065	0.027775	1.0385e-10	1.00142e-09	0.068179	0.227705	0.0868297	0.159304	0.499862	0.636118	-0.640239	2.97462e-09	3.0478e-08	-5.16527
WBGene00000985	dhs-22	93.7624	91.5866	94.1366	123.066	122.977	118.54	94.9871	81.2805	83.8913	83.4242	85.2869	81.3576	100.81	101.049	102.612	93.2343	99.3119	94.2339	84.4776	77.1402	78.9895	103.388	95.4354	102.33	85.2546	86.3954	93.1802	dhs-22	0.383386	-0.106084	-0.161438	0.123091	0.0370858	-0.215391	0.105817	-0.079358	2.00306e-09	1.57693e-08	0.02739	0.129271	0.00163935	0.00546671	7.03734e-05	0.000485761	0.284529	1.17492e-06	7.44704e-06	-1.76246
WBGene00000986	dhs-23	1.01361	1.11114	1.46407	2.77916	2.89358	3.15256	1.04747	1.32981	1.12688	1.15628	1.11181	1.20791	1.43741	0.909788	1.24867	1.1191	0.782896	0.819985	1.32684	1.68088	1.49143	1.22698	1.04124	1.07104	1.04747	1.27082	0.807674	dhs-23	1.32213	-0.0205388	-0.0262111	-0.00831893	-0.424116	0.331536	-0.0891439	-0.199824	1.08967e-08	7.64929e-08	0.913117	0.963071	0.89262	0.929876	0.0730936	0.152409	0.0178921	0.92742	0.954969	-0.682618
WBGene00000987	dhs-24	52.149	55.6961	54.5203	46.1718	48.7176	47.8033	54.1889	47.2488	47.3538	53.9018	53.944	54.3495	43.5712	48.3566	47.1993	47.6301	44.8245	46.4448	52.8628	51.7383	53.8076	46.4096	49.6263	47.0966	47.2996	48.3801	47.013	dhs-24	-0.186352	-0.126046	0.000220486	-0.222806	-0.22533	-0.0338333	-0.180181	-0.184679	0.000327128	0.000973981	0.00911738	0.0648675	0.996136	0.998148	0.457867	0.599693	-0.223027	4.49481e-05	0.000205838	-1011.52
WBGene00000988	dhs-25	100.07	107.491	104.804	22.0408	20.9049	20.8537	94.8592	87.0711	88.469	101.18	113.353	105.367	28.8801	26.1411	26.0753	49.7973	49.588	52.6562	98.6437	98.3188	95.2668	31.9153	33.2367	28.5242	114.277	107.744	110.098	dhs-25	-2.28554	-0.207022	0.0342007	-1.94268	-1.03515	-0.0944592	-1.73116	0.0893927	1.14029e-25	1.75251e-23	5.75264e-05	0.00469043	0.438446	0.563077	0.0392529	0.0934355	-1.97688	5.36688e-25	1.35082e-22	-57.8023
WBGene00000989	dhs-26	39.0348	41.2435	41.9471	0.376178	0.234285	0.178866	49.6609	50.4105	50.1137	2.24082	1.69779	2.49654	0.14382	0.174276	0.100299	7.79761	6.58294	6.78882	8.8369	8.13962	8.55367	0.486198	0.557617	0.547709	27.0918	24.6124	28.5371	dhs-26	-7.30043	0.298708	-4.2505	-8.19455	-2.53811	-2.25406	-6.25514	-0.609048	1.82914e-15	3.83986e-14	5.3894e-07	0.000199144	9.91541e-22	1.95683e-19	9.66194e-23	5.78617e-20	-3.94405	3.2175e-08	2.71518e-07	0.927901
WBGene00000990	dhs-27	10.8016	10.9238	10.5703	7.05273	7.38707	7.80269	10.6668	9.95131	10.2803	10.1546	8.78597	9.55317	8.17317	7.56357	7.81068	10.1134	11.2658	11.6328	9.66896	9.77985	10.008	7.71988	6.91256	6.60944	10.7627	10.292	11.4728	dhs-27	-0.541006	-0.0636372	-0.181928	-0.455507	0.0366809	-0.132698	-0.60085	0.00833244	2.18008e-08	1.45958e-07	0.328806	0.575469	0.0110696	0.0283132	0.0522603	0.117248	-0.273579	0.000649515	0.00226463	1.50377
WBGene00000991	dhs-28	113.581	110.429	117.25	179.605	188.313	183.678	116.234	107.21	108.263	91.3716	95.1929	94.8592	86.1811	86.3253	85.3016	65.0651	68.2586	66.7985	101.947	98.2543	98.203	108.545	111.366	109.836	82.484	80.9716	78.8499	dhs-28	0.691846	-0.0413537	-0.277853	-0.404223	-0.76886	-0.192925	-0.0493313	-0.493925	2.44629e-19	1.00675e-17	0.214911	0.453562	4.78109e-09	8.12457e-08	2.83351e-06	3.37977e-05	-0.126371	0.00102131	0.00339013	0.454811
WBGene00000992	dhs-29	8.97161	7.49894	8.75054	8.84168	9.13886	8.82995	8.28492	7.8914	8.04414	9.4403	9.32114	8.71789	8.78837	10.1165	10.0608	7.46769	7.87408	9.34754	8.62555	7.86915	8.75219	8.28671	8.29188	11.1896	7.3799	8.23765	7.00656	dhs-29	0.0871405	-0.0586818	0.120296	0.195507	-0.0272887	0.00253297	0.109426	-0.158686	0.362891	0.451683	0.543375	0.749012	0.215557	0.327036	0.979058	0.988569	0.0752107	0.428509	0.549671	0.625213
WBGene00000993	dhs-30	19.5663	19.6159	21.4923	20.864	23.5928	21.7126	22.0861	20.0595	19.0953	18.6534	19.9155	20.0574	21.912	20.6406	20.3508	18.0789	18.0076	18.8905	16.7526	17.843	18.6262	19.6175	20.6357	19.395	19.3592	18.9678	17.8018	dhs-30	0.121737	0.0146727	-0.0475862	0.0534181	-0.139406	-0.191428	-0.02182	-0.111251	0.0430842	0.0741716	0.801517	0.907815	0.430412	0.555806	0.00349013	0.0127795	0.101004	0.101423	0.17717	-2.12256
WBGene00000994	dic-1	59.285	58.6747	53.2726	52.0589	53.1685	49.7575	57.943	66.5834	70.9348	65.6523	64.0477	62.1367	61.1757	59.9069	63.6665	66.3609	65.3017	61.3003	61.6556	62.9636	63.3038	63.3695	61.3441	68.6809	62.4656	59.275	67.8584	dic-1	-0.142924	0.185197	0.16415	0.109904	0.170884	0.13506	0.172137	0.145694	0.0229278	0.043066	0.00313917	0.033757	0.00865097	0.0229131	0.0271362	0.0692439	-0.0542452	0.357933	0.478613	-0.330462
WBGene00000995	die-1	58.6336	54.1711	57.2257	43.145	45.1836	45.3181	56.2994	62.2861	61.6145	60.949	62.0941	62.1952	56.723	57.6532	58.6336	65.9806	62.7491	61.5367	54.8492	54.5132	58.5325	54.7465	58.0891	58.1397	59.9449	55.5392	60.1453	die-1	-0.349971	0.081105	0.123189	0.0240552	0.158918	-0.0198028	0.00578946	0.0448488	1.62042e-08	1.1049e-07	0.0680385	0.22744	0.00798151	0.0213978	0.651871	0.764264	-0.0991336	0.0298894	0.0637624	-0.804729
WBGene00000996	dif-1	102.993	105.957	100.366	149.419	158.32	146.707	98.052	112.661	102.386	97.659	96.7963	91.6867	118.094	119.823	118.641	89.7093	94.6102	89.5559	97.7999	101.858	97.0461	129.432	128.82	126.209	103.256	101.111	98.3188	dif-1	0.554708	0.0160959	-0.113189	0.205818	-0.175052	-0.0603117	0.314884	-0.0307145	2.30664e-14	4.018e-13	0.692256	0.84591	0.0101299	0.0262459	0.149232	0.264218	0.319007	1.5164e-08	1.35749e-07	-2.81837
WBGene00000998	dig-1	74.1687	77.9688	62.6735	64.5358	66.4844	67.4398	61.7735	93.0173	108.752	106.863	118.783	109.662	115.186	122.255	116.767	107.321	111.429	112.009	96.2972	97.4791	104.196	95.7655	99.2394	104.325	98.0295	92.4023	96.7515	dig-1	-0.108718	0.257487	0.648	0.729015	0.630992	0.478094	0.483193	0.425648	0.334183	0.421969	0.0228483	0.11592	1.19735e-06	1.04285e-05	0.000104383	0.000676175	0.081015	0.428284	0.549539	0.125023
WBGene00001000	dim-1	303.982	313.526	306.881	216.857	234.426	235.089	310.467	303.982	293.198	245.322	259.063	250.018	197.741	196.829	200.427	236.817	234.183	231.829	279.078	278.441	268.059	220.371	218.745	210.534	247.38	262.064	262.664	dim-1	-0.431437	-0.0258066	-0.293226	-0.635447	-0.395401	-0.16277	-0.50794	-0.259841	7.08133e-14	1.12209e-12	0.412129	0.652519	5.03689e-10	1.05013e-08	1.6212e-05	0.000142741	-0.342221	3.79219e-11	5.36748e-10	1.16709
WBGene00001001	dis-3	144.042	147.52	141.423	133.294	120.742	127.735	141.953	142.629	147.039	134.437	132.078	127.485	125.446	124.214	125.034	124.665	125.707	124.137	134.168	141.021	135.615	132.323	132.145	139.488	134.168	129.779	136.509	dis-3	-0.181119	-0.00466375	-0.136701	-0.208238	-0.208975	-0.076498	-0.101394	-0.112741	7.97423e-06	3.32186e-05	0.887794	0.949872	0.000317677	0.00131862	0.0281406	0.0712937	-0.0715371	0.0437046	0.0881758	0.523311
WBGene00001002	div-1	82.0308	79.3308	80.4936	78.6602	77.9688	77.522	81.2953	77.4517	76.7723	77.0516	73.8933	77.783	75.7385	73.9576	73.7599	79.6589	78.2347	79.9028	74.6212	74.9978	76.3191	79.0546	75.9903	80.9716	76.9675	77.522	76.8396	div-1	-0.0467647	-0.0385286	-0.0806299	-0.114423	-0.0248378	-0.0987759	-0.0373597	-0.0644761	0.138878	0.202732	0.217254	0.456841	0.0147016	0.0360981	0.00338403	0.0124544	-0.0337927	0.291452	0.408725	0.419108
WBGene00001005	dlc-1	310.013	304.391	313.526	292.876	297.353	286.29	325.582	269.952	264.67	265.087	265.087	269.226	267.362	259.063	250.239	275.465	290.88	282.744	270.353	253.474	265.787	250.239	261.108	235.74	280.541	294.48	273.713	dlc-1	-0.0822906	-0.114383	-0.214783	-0.256712	-0.127687	-0.232403	-0.312094	-0.129101	0.100364	0.153882	0.025109	0.122564	0.000149761	0.000686435	5.36387e-05	0.00038782	-0.0419286	0.407978	0.530228	0.195213
WBGene00001006	dlg-1	42.4867	40.0675	40.0878	38.2785	40.3587	39.9232	39.106	49.6263	45.152	41.9704	40.7287	40.4509	48.0946	49.6744	47.7785	46.3339	42.2812	44.1741	42.9561	40.6654	41.2952	41.8059	43.3919	42.8768	41.8917	42.8212	42.9102	dlg-1	-0.0511893	0.118571	0.00468636	0.246874	0.110961	0.0270765	0.0615954	0.0568509	0.355847	0.444291	0.0341763	0.147873	0.932368	0.956491	0.62102	0.738868	0.242187	0.000111939	0.000469086	51.6792
WBGene00001007	dli-1	109.883	109.028	110.77	118.986	125.446	129.375	111.71	96.6284	89.5559	91.9774	92.3875	96.7515	96.481	95.2826	99.9493	99.7739	100.997	98.2233	89.1188	96.577	94.2006	105.715	101.294	99.1968	94.2339	97.0221	94.8414	dli-1	0.179029	-0.150373	-0.229532	-0.177404	-0.141353	-0.23855	-0.106101	-0.204631	0.000794103	0.00216706	0.00434259	0.0406919	7.05551e-05	0.000355975	3.98143e-05	0.000301814	0.0521276	0.306645	0.424602	-0.227104
WBGene00001008	dlk-1	54.4551	55.5312	55.5231	63.7008	62.1049	63.2556	52.2431	51.4568	51.6414	70.4419	69.8955	68.722	66.8173	64.5173	60.065	72.7035	77.9688	77.0092	55.1891	54.0488	57.1954	57.6404	57.8155	55.3155	59.3857	60.1881	58.162	dlk-1	0.192593	-0.0909176	0.336821	0.20978	0.461501	0.00837327	0.046878	0.103189	1.30786e-05	5.20119e-05	0.0213388	0.111624	4.7647e-10	9.95771e-09	0.823624	0.8896	-0.127041	0.00145617	0.0046411	-0.377176
WBGene00001016	dna-2	103.51	103.638	98.0745	105.565	104.619	102.503	97.2765	90.2459	91.5491	92.5853	87.3343	93.0579	94.7123	92.2314	93.5147	92.4023	87.6844	90.3043	93.2566	92.9254	90.6421	99.15	98.9471	97.2765	93.6793	93.8435	94.948	dna-2	0.0356632	-0.129094	-0.160572	-0.121691	-0.175442	-0.140289	-0.0463455	-0.111309	0.279408	0.364109	0.000457004	0.0122567	3.9595e-05	0.000215428	0.000194824	0.00113237	0.0388808	0.254425	0.368401	-0.242139
WBGene00001017	dnc-1	177.819	182.887	179.229	204.076	208.979	202.2	182.142	193.469	198.739	192.095	190.926	183.054	211.28	210.342	210.716	200.556	202.429	201.488	188.181	192.24	182.198	214.63	217.693	221.498	197.555	193.095	199.947	dnc-1	0.188565	0.0879133	0.0676534	0.22834	0.16341	0.059228	0.275905	0.129532	6.69431e-07	3.45806e-06	0.00618071	0.0509931	0.0320678	0.0699098	0.0573229	0.125745	0.160686	9.12629e-06	4.86334e-05	2.37514
WBGene00001018	dnc-2	77.1249	77.783	74.5582	82.136	79.2665	80.2142	76.9297	64.4403	62.1262	63.5584	57.8775	57.749	66.1687	65.7389	64.0392	62.6735	63.6427	61.6556	60.4203	56.8168	58.6747	66.3825	64.6911	68.5173	61.6436	56.0704	61.8677	dnc-2	0.0753312	-0.177062	-0.358819	-0.227105	-0.287739	-0.382026	-0.202555	-0.355233	0.15086	0.217516	0.00194024	0.0253704	2.69591e-07	2.8601e-06	7.87851e-08	1.71892e-06	0.131714	0.022518	0.0501051	-0.367077
WBGene00001019	dnj-1	82.2997	79.1415	79.3157	79.3722	76.3191	75.6833	81.8424	88.2568	87.7965	86.0519	88.0251	86.6945	78.5677	82.2741	83.3132	79.995	81.167	82.6684	89.141	84.7133	88.2416	84.4445	83.4377	85.0651	86.3253	84.4445	90.9415	dnj-1	-0.0569042	0.097556	0.11482	0.0191277	0.0187756	0.122789	0.0705992	0.119028	0.121371	0.180745	0.00945815	0.0665288	0.00301712	0.00932356	0.0015975	0.00667237	-0.095692	0.0117867	0.0288512	-0.833411
WBGene00001020	dnj-2	38.5393	38.9249	40.3176	37.3537	34.0154	35.8299	39.9232	39.6118	40.1753	37.9793	37.0069	38.8481	37.6493	37.8839	37.3874	37.2315	40.4891	38.6085	39.864	36.4826	35.7867	39.1509	36.9322	40.7423	37.5774	37.4641	40.4509	dnj-2	-0.13415	0.0236875	-0.0479705	-0.0600755	-0.0162848	-0.0691364	-0.0148741	-0.0292755	0.00681174	0.0148692	0.601415	0.790897	0.305348	0.428137	0.141246	0.25338	-0.012105	0.796586	0.861736	0.252343
WBGene00001021	dnj-3	8.25755	7.9428	7.42447	6.91137	7.24875	7.35737	7.58905	8.25579	6.18526	7.79161	8.53928	7.85245	8.6193	8.10297	7.73333	7.71652	7.93834	8.25755	7.89515	8.32718	8.35377	6.96009	7.64307	8.0278	7.62266	8.35377	9.1613	dnj-3	-0.137136	-0.103653	0.0317923	0.0504999	0.0206416	0.0547184	-0.068339	0.0849909	0.119905	0.1789	0.229025	0.471465	0.709215	0.794129	0.515583	0.649619	0.0187076	0.826814	0.883485	0.588433
WBGene00001022	dnj-4	16.0219	14.8509	15.4794	16.7286	17.1885	16.7741	15.859	16.8584	16.4748	19.9362	21.3181	19.2749	19.1587	19.2626	19.1202	18.826	18.431	19.511	19.3255	19.3255	17.7977	22.3526	18.7396	18.6534	17.9475	17.6503	17.8018	dnj-4	0.127375	0.0839963	0.380643	0.310775	0.291967	0.282615	0.363419	0.202825	0.0386512	0.067592	0.162691	0.386317	3.45683e-07	3.55867e-06	3.63769e-05	0.000279292	-0.0698673	0.222208	0.331224	-0.183551
WBGene00001023	dnj-5	411.667	405.692	412.771	460.469	442.855	444.243	406.618	502.964	497.206	515.103	498.63	511.641	631.601	634.696	628.869	504.458	520.472	507.29	507.29	507.29	508.943	599.948	593.437	686.633	504.458	504.458	516.928	dnj-5	0.131808	0.185683	0.31023	0.623604	0.316842	0.30852	0.606068	0.310575	0.015094	0.0298597	0.00100537	0.0178791	1.27558e-06	1.10232e-05	1.31443e-06	1.80368e-05	0.313374	6.88049e-07	4.52798e-06	1.01013
WBGene00001025	dnj-7	54.2531	53.3203	53.353	44.4994	44.7367	44.6905	57.1702	66.1189	58.0276	45.3621	51.9212	47.9445	50.5424	50.7243	51.1036	54.821	55.1416	53.7803	54.4628	51.288	53.5408	47.5311	45.8887	49.5309	59.7861	60.9871	57.7258	dnj-7	-0.265331	0.169688	-0.150742	-0.0792074	0.0242314	-0.014077	-0.173921	0.149224	5.00536e-06	2.16539e-05	0.000770756	0.0155626	0.0033766	0.0102717	0.762232	0.846566	0.0715343	0.14447	0.235879	-0.474549
WBGene00001026	dnj-8	93.4959	92.0858	90.7248	97.4416	96.6284	88.9027	90.0012	104.03	105.242	105.293	105.988	101.888	109.479	109.785	112.749	108.446	105.856	98.6946	103.566	104.167	106.479	107.491	106.817	121.76	103.68	101.858	105.957	dnj-8	0.0340863	0.110347	0.179793	0.264585	0.176579	0.185119	0.276598	0.172616	0.500466	0.586279	0.0337688	0.146726	0.00115341	0.00402476	0.000825504	0.00386013	0.0847924	0.0955764	0.168413	0.471612
WBGene00001027	dnj-9	50.2657	51.9527	47.934	45.5113	42.5185	40.6591	48.8799	47.1708	49.3641	66.5834	67.7782	67.1839	45.8955	44.2263	45.7945	47.7785	47.3436	45.5193	59.7789	62.9095	61.2251	46.3662	43.8616	48.3346	45.3325	47.0774	47.9594	dnj-9	-0.220305	-0.0457493	0.42613	-0.1431	-0.0950233	0.292606	-0.118532	-0.0964276	1.57886e-05	6.17987e-05	0.277657	0.526027	2.35138e-11	6.43094e-10	6.55483e-08	1.48033e-06	-0.56923	4.14961e-14	1.01359e-12	-1.33581
WBGene00001028	dnj-10	62.9922	62.9805	62.0226	58.5877	58.0992	61.2251	61.0742	64.9031	64.5667	105.367	104.108	98.6758	71.1493	75.9819	76.8598	65.4309	68.9014	65.6859	96.4686	95.1675	96.1127	71.2834	73.1713	74.9517	64.4207	66.8407	67.4542	dnj-10	-0.0804642	0.0184415	0.711643	0.251587	0.0895192	0.614529	0.22154	0.079736	0.0417947	0.0722885	0.623798	0.807159	3.80687e-18	3.82161e-16	1.83504e-16	2.82027e-14	-0.460056	1.75231e-13	3.82317e-12	-0.64647
WBGene00001029	dnj-11	236.584	238.538	229.561	218.903	209.887	210.342	228.02	238.773	240.019	229.351	230.565	227.606	218.265	226.593	219.803	216.035	226.345	225.247	236.034	234.661	227.732	225.488	227.606	231.829	238.044	232.714	239.124	dnj-11	-0.140134	0.00393001	-0.0354054	-0.0840512	-0.0769935	-0.0125478	-0.0412428	0.0106906	2.56609e-05	9.66082e-05	0.887718	0.949872	0.214606	0.325905	0.65438	0.766065	-0.0486458	0.0946414	0.166985	1.37397
WBGene00001030	dnj-12	314.865	305.575	307.365	279.078	280.541	278.441	312.467	347.734	331.391	344.161	345.561	337.118	310.013	319.598	318.729	373.028	373.028	371.805	323.363	317.807	315.324	295.57	292.366	290.88	353.009	356.581	366.668	dnj-12	-0.146977	0.0942652	0.145768	0.0311978	0.268603	0.0439692	-0.0782803	0.213651	1.90298e-05	7.32795e-05	0.00232842	0.0281207	1.81084e-05	0.00010954	0.132306	0.240703	-0.114571	0.00037821	0.00139557	-0.785977
WBGene00001031	dnj-13	207.864	191.148	203.524	186.34	186.422	184.125	204.248	189.445	182.887	178.242	173.954	170.602	158.215	156.234	159.627	187.757	180.889	189.05	172.274	169.086	168.189	157.086	159.295	154.062	186.259	186.994	184.994	dnj-13	-0.11351	-0.0641455	-0.205335	-0.346056	-0.111821	-0.241472	-0.356409	-0.11007	0.00192057	0.0047999	0.0616813	0.214188	1.27812e-06	1.10379e-05	7.09256e-08	1.58325e-06	-0.140722	0.000315356	0.00118699	0.685329
WBGene00001032	dnj-14	27.4781	28.6002	28.1398	40.2906	43.5073	43.0349	26.3862	24.8729	23.1332	24.4408	25.8869	25.5193	34.9011	35.1386	32.2023	23.4651	26.2755	26.0071	23.6837	23.9034	23.4895	32.0049	34.717	30.9507	25.6443	24.7943	24.1928	dnj-14	0.588169	-0.177101	-0.149317	0.280992	-0.148415	-0.243218	0.216522	-0.173186	1.71697e-12	2.19739e-11	0.00246642	0.029139	0.0101372	0.0262608	0.000113637	0.000723967	0.430309	8.31856e-09	7.83877e-08	-2.88185
WBGene00001033	dnj-15	22.8444	23.73	22.8365	24.6676	23.4008	24.9694	23.1332	21.1068	23.6513	22.7494	23.6324	23.3547	25.1282	27.5286	24.4911	25.2337	24.4013	23.4651	22.4978	22.3671	23.2324	25.1543	24.9803	27.8308	24.4451	22.7046	23.4598	dnj-15	0.0745443	-0.0343239	0.00753627	0.153662	0.072077	-0.0270211	0.162392	0.0248705	0.163125	0.232213	0.51722	0.730943	0.888129	0.926765	0.612819	0.731869	0.146125	0.00978462	0.0245563	19.3896
WBGene00001034	dnj-16	52.7528	52.4119	53.6861	58.4211	58.3683	55.1584	51.288	56.4673	55.6961	59.595	57.749	55.4851	58.5769	62.2719	61.2812	61.3003	60.949	56.7472	55.1115	55.677	57.013	60.938	56.6464	61.2709	56.3333	57.8155	61.5548	dnj-16	0.114517	0.0391573	0.119787	0.196826	0.169237	0.0784526	0.168539	0.144163	0.0145611	0.0289505	0.381383	0.625093	0.0114911	0.0292275	0.0865636	0.173297	0.0770394	0.0902492	0.16087	0.643138
WBGene00001035	dnj-17	50.219	49.187	47.975	50.4005	47.4024	47.2392	46.1577	44.7367	44.5802	49.5547	49.1656	49.5789	48.2914	47.2392	46.8799	48.978	48.8486	49.0119	50.258	48.5876	49.906	50.7617	50.4219	47.4784	48.2532	48.9343	48.0176	dnj-17	-0.0218906	-0.121207	0.00916815	-0.0493323	-0.00524483	0.0140121	0.0142642	-0.0214303	0.526163	0.610454	0.00140376	0.0213104	0.791182	0.858886	0.683614	0.788701	-0.0585005	0.102555	0.178696	-6.38084
WBGene00001036	dnj-18	20.3937	18.9098	20.5807	21.0383	21.3501	20.0637	19.2457	20.5939	20.4637	23.2019	23.0692	21.8188	24.2515	23.0388	23.3613	22.5221	21.8241	21.3181	22.6822	23.7429	21.6805	21.164	22.9835	24.5233	20.5229	20.5171	22.3833	dnj-18	0.0598864	0.00784532	0.182327	0.237801	0.129489	0.183018	0.189686	0.0803089	0.279639	0.364246	0.886027	0.949053	0.00218104	0.00702487	0.00195099	0.00782874	0.0554739	0.305709	0.423521	0.304255
WBGene00001037	dnj-19	337.118	318.382	314.309	285.093	279.673	281.526	334.324	342.558	333.815	326.114	324.359	309.611	276.615	286.574	276.972	324.359	317.807	320.184	309.143	306.564	312.959	290.88	282.262	288.526	335.553	335.096	337.628	dnj-19	-0.196233	0.0597174	-0.0154463	-0.206896	-0.0114045	-0.0624277	-0.170744	0.0561774	5.71944e-08	3.57043e-07	0.031634	0.141449	0.568172	0.679459	0.026708	0.068322	-0.19145	1.07894e-07	8.30582e-07	12.3946
WBGene00001038	dnj-20	279.673	274.474	280.841	197.648	196.144	196.144	285.433	279.387	276.072	285.433	294.824	275.09	188.181	188.796	186.837	297.01	303.982	310.467	298.644	293.472	306.564	186.422	186.422	197.741	298.644	309.143	303.186	dnj-20	-0.501202	0.0101668	0.033396	-0.566577	0.126917	0.105832	-0.551178	0.125455	1.13105e-16	2.90146e-15	0.716682	0.860487	0.241832	0.357833	0.000671781	0.00324349	-0.599973	1.26925e-18	7.42191e-17	-17.9654
WBGene00001039	dnj-21	15.1815	16.0293	17.1731	14.5541	13.2305	15.467	15.8954	15.8536	16.2329	19.7558	20.3818	18.013	16.6715	17.8561	18.484	16.999	18.0763	17.4254	19.5644	19.6087	19.7281	18.7552	16.7694	17.6313	17.3425	18.907	17.9619	dnj-21	-0.161423	-0.00968319	0.263382	0.132353	0.121959	0.286827	0.137037	0.166784	0.0158541	0.0311257	0.875024	0.943378	0.000146013	0.000671383	4.34102e-05	0.000323287	-0.131029	0.0365421	0.0756048	-0.497488
WBGene00001040	dnj-22	67.924	68.1414	66.2888	65.6038	60.301	61.8216	67.4398	66.7892	66.1941	64.4207	64.2117	64.6762	63.5967	62.8981	64.9746	61.8394	64.0392	63.1686	63.7742	63.2306	62.3208	64.5667	64.3917	70.1448	64.1948	66.1687	66.2888	dnj-22	-0.107177	-0.0134678	-0.0656998	-0.0801674	-0.0972969	-0.0956268	-0.0269202	-0.0412393	0.00420153	0.00968645	0.694463	0.847498	0.067562	0.129637	0.00959753	0.0293865	-0.0144676	0.682169	0.77395	0.220208
WBGene00001041	dnj-23	54.6904	55.15	57.1824	57.943	56.8738	56.6873	53.4288	59.8684	61.8305	62.2861	65.3658	63.1686	62.6448	65.5216	64.4987	66.4989	67.5938	71.2475	60.9708	60.9817	64.1671	65.2713	66.9228	67.6071	65.4309	65.0507	65.2479	dnj-23	0.0390386	0.064305	0.192076	0.206224	0.299598	0.155901	0.258089	0.229188	0.356642	0.444957	0.130834	0.339838	7.31132e-05	0.000367088	0.000753407	0.00356815	0.0141486	0.73264	0.813539	0.0736617
WBGene00001042	dnj-24	15.7165	15.5822	16.6314	8.06185	8.9905	8.90284	15.0124	15.1179	13.3211	11.614	10.6383	12.6522	8.29188	8.31756	7.29921	10.5703	12.7586	12.2747	13.7833	13.8002	13.2431	8.14181	9.02439	8.53603	14.8184	14.4053	14.9106	dnj-24	-0.887102	-0.139694	-0.454586	-0.998609	-0.423191	-0.229852	-0.894884	-0.118699	2.0423e-12	2.58142e-11	0.039546	0.161675	4.76394e-07	4.66641e-06	0.0017197	0.00707556	-0.544022	1.92818e-07	1.40701e-06	1.19674
WBGene00001043	dnj-25	90.4664	93.1962	88.4463	98.6946	99.1103	100.227	87.9728	88.368	88.9027	83.826	85.8843	85.7846	95.0074	93.3838	95.0277	91.2757	87.4496	92.4179	87.4033	89.0219	88.1384	96.481	97.9799	95.4354	92.0858	88.5968	89.6243	dnj-25	0.131772	-0.0362877	-0.0900819	0.0592756	-0.00482193	-0.0402411	0.0924782	-0.00910354	7.45221e-05	0.000253621	0.215817	0.454866	0.00443378	0.0130224	0.173739	0.295642	0.149358	1.94258e-05	9.61984e-05	-1.65802
WBGene00001044	dnj-26	6.9469	6.49496	6.41824	7.26291	7.85445	7.64769	6.4967	6.50009	5.6139	6.88305	6.63969	6.42051	8.45729	8.02075	7.91202	6.85195	7.06664	6.76015	6.25459	7.16377	6.81614	8.8744	8.87803	7.84073	7.3799	6.60716	6.27524	dnj-26	0.192481	-0.0935091	0.00297217	0.295481	0.0569522	0.018636	0.368561	0.0251997	0.0158308	0.0310869	0.238108	0.481304	0.969954	0.980851	0.810537	0.881002	0.292509	0.000665252	0.00231115	98.4158
WBGene00001045	dnj-27	34.2283	33.6327	32.4642	44.6905	49.2874	47.0966	32.2063	40.4509	38.4573	36.7891	38.1031	36.9409	52.3771	54.3876	56.419	43.3548	40.4407	43.0043	36.944	35.4624	37.7458	43.5457	42.582	43.564	43.4178	43.1714	41.1413	dnj-27	0.488824	0.139191	0.156134	0.700876	0.3365	0.13518	0.369874	0.348592	1.38692e-09	1.12083e-08	0.0210311	0.110782	0.0114824	0.0292098	0.025775	0.0663471	0.544742	1.13247e-10	1.49222e-09	3.48894
WBGene00001046	dnj-28	38.0439	36.2969	36.6616	34.9648	33.601	35.6115	35.7921	36.8576	37.6713	38.6085	38.6012	40.201	35.5086	37.5667	36.3122	39.8208	40.4891	41.26	37.3713	37.327	35.9418	36.1692	35.3671	34.2543	39.5888	36.9379	38.7899	dnj-28	-0.0920767	-0.010507	0.0812059	-0.0217197	0.131732	-0.00514197	-0.0683434	0.0534678	0.0256179	0.0473606	0.786587	0.899838	0.0449115	0.0926669	0.895362	0.935492	-0.102926	0.0135254	0.0323504	-1.26746
WBGene00001047	dnj-29	212.367	214.45	210.534	197.873	200.273	201.685	215.542	212.195	214.067	201.864	209.298	210.716	204.567	201.29	207.688	207.149	204.567	207.864	211.529	208.564	209.217	203.912	207.327	203.756	215.418	219.09	214.23	dnj-29	-0.0876924	0.0101559	-0.0352331	-0.055156	-0.0406825	-0.0179763	-0.0512083	0.0257136	0.0009753	0.0026067	0.670376	0.834761	0.151221	0.247237	0.455464	0.597615	-0.0199229	0.414448	0.536382	0.56546
WBGene00001048	dnj-30	38.668	37.8839	37.2618	38.1603	36.1131	38.3591	38.0153	35.917	40.0119	37.0749	37.3398	37.3713	35.0251	38.668	37.8971	36.019	37.032	38.4999	37.6493	37.7458	34.7614	38.8971	40.8235	40.8235	39.043	37.3921	38.5316	dnj-30	-0.0150398	-0.00156504	-0.0259867	-0.0301478	-0.0272902	-0.0479012	0.0815797	0.0139001	0.739077	0.79625	0.972087	0.988564	0.56998	0.680988	0.295486	0.436967	-0.00416111	0.928022	0.955362	0.160125
WBGene00001049	dog-1	63.6082	66.4277	61.6145	63.3618	60.949	61.408	60.1965	67.2328	65.3948	66.7747	65.6038	68.7924	68.6086	69.469	68.5725	68.9014	69.9745	68.6575	67.619	68.2015	70.1794	70.9932	70.1448	71.598	67.924	69.1761	70.3201	dog-1	-0.0432997	0.00808342	0.0717752	0.110207	0.116223	0.105031	0.151461	0.115235	0.246966	0.329067	0.825149	0.919148	0.0593294	0.116651	0.00711029	0.0229525	0.0384321	0.300723	0.418302	0.535452
WBGene00001050	dom-3	21.5386	21.3861	22.2504	22.6067	24.2214	23.1633	22.9776	23.7034	19.9553	21.9587	20.9963	23.3547	21.3222	22.4599	23.7848	24.2515	23.0388	20.6166	20.6166	24.0867	21.4558	23.6664	23.7848	23.9227	20.3418	19.5397	21.7055	dom-3	0.100621	0.0317034	0.025462	0.0490012	0.0493271	0.0136495	0.130312	-0.0840574	0.13237	0.194659	0.629632	0.809866	0.703954	0.789867	0.836963	0.898365	0.0235392	0.726144	0.808601	0.924482
WBGene00001051	cks-1	131.971	125.781	130.002	126.954	132.581	129.248	130.4	102.993	105.692	111.531	109.754	108.574	109.142	108.219	107.541	108.372	110.742	114.804	104.557	103.231	100.348	108.703	111.71	108.776	112.809	115.746	105.097	cks-1	0.00284962	-0.200586	-0.233743	-0.255186	-0.214892	-0.331496	-0.236005	-0.217736	0.955645	0.967624	0.000522813	0.0130062	0.000106276	0.00050852	6.48389e-07	1.01173e-05	-0.0214433	0.688203	0.778481	0.0917388
WBGene00001052	dop-1	2.02224	1.64162	2.29281	1.41462	1.88663	1.8208	1.73574	2.02224	1.98982	1.92682	2.13118	2.09726	1.74398	1.97511	1.73917	1.92819	1.79	1.81167	1.74784	2.33053	1.41213	2.18928	1.83989	2.2947	1.83989	1.73368	1.74398	dop-1	-0.238889	-0.0510053	0.0530067	-0.120399	-0.107165	-0.152341	0.0765944	-0.158669	0.130106	0.191714	0.729484	0.86643	0.721829	0.80488	0.321454	0.464915	-0.173406	0.263382	0.378562	-3.2714
WBGene00001053	dop-2	3.02367	2.0193	2.18328	1.60137	1.32867	1.95476	2.65996	2.92311	3.17521	2.24082	1.92449	2.18456	2.08912	2.06656	1.9425	1.69529	2.24855	2.17305	2.42725	2.68755	2.28996	2.303	2.06055	1.89723	2.85265	2.49546	2.20615	dop-2	-0.566599	0.277894	-0.173887	-0.230619	-0.221297	0.0399589	-0.188431	0.0673743	0.00167674	0.00424298	0.0501747	0.188082	0.260091	0.378308	0.781227	0.85985	-0.0567327	0.720937	0.804106	0.326262
WBGene00001054	dpf-1	6.3679	6.17687	5.53385	4.43263	5.53733	5.03678	6.35816	6.37444	5.38544	6.92635	5.67919	6.52741	5.56351	4.97771	5.48749	4.96275	5.86656	5.6389	5.86353	6.42202	6.1775	5.69213	5.90222	5.26695	5.69968	5.98725	6.4395	dpf-1	-0.28001	0.00569795	0.0801195	-0.17488	-0.128178	0.0278385	-0.0946679	0.00310988	0.00703928	0.0153178	0.950432	0.979096	0.390616	0.515723	0.763141	0.847083	-0.255	0.0122402	0.0297516	-3.18275
WBGene00001055	dpf-2	41.8522	43.5712	43.1154	33.0822	35.2661	33.7327	45.0925	50.0128	47.1142	47.7862	41.7264	45.1434	40.1753	37.7131	40.7287	45.2082	43.4178	42.2002	38.562	40.5005	40.1753	36.9322	35.4479	39.5672	39.5336	37.032	39.5073	dpf-2	-0.334262	0.14573	0.065678	-0.117151	0.0231345	-0.109617	-0.204505	-0.147649	3.51216e-07	1.90731e-06	0.00487562	0.0438932	0.188916	0.29486	0.0344315	0.0838787	-0.182829	0.000973924	0.00324835	-2.78372
WBGene00001056	dpf-3	273.713	279.387	268.059	311.451	306.04	301.423	270.695	304.807	308.708	305.226	295.195	298.644	361.996	368.152	374.492	308.124	302.795	297.01	302.537	304.391	304.391	350.698	342.823	368.152	302.795	297.714	316.381	dpf-3	0.16299	0.103817	0.130948	0.428016	0.144473	0.150616	0.369234	0.158851	9.85086e-05	0.000326551	0.00740035	0.0573758	0.00115522	0.00402947	0.000255234	0.00141709	0.297069	4.14102e-09	4.11425e-08	2.26861
WBGene00001057	dpf-4	92.2711	95.0417	93.4772	104.586	103.748	99.7501	91.1413	94.2501	93.4169	102.431	101.918	99.9493	104.909	106.479	104.956	95.7655	95.37	98.3766	100.3	99.6361	97.5923	106.54	103.805	114.198	89.3806	99.15	93.355	dpf-4	0.13457	-0.0100245	0.116028	0.172571	0.0449998	0.0841108	0.206138	0.00505566	0.00064814	0.00180475	0.778496	0.894663	0.00274874	0.00859977	0.0239853	0.0626489	0.056543	0.118997	0.20115	0.487322
WBGene00001058	dpf-5	235.268	238.948	241.71	309.611	308.708	312.229	238.044	232.521	223.058	258.766	257.278	265.087	293.198	288.877	295.382	276.072	278.779	276.972	248.538	256.629	247.715	284.236	280.541	283.142	257.278	252.705	259.42	dpf-5	0.378446	-0.045317	0.126216	0.293522	0.2168	0.0722768	0.244274	0.103987	3.59384e-15	7.12492e-14	0.08402	0.258948	2.74923e-05	0.000156801	0.00781665	0.0248402	0.167306	2.76897e-07	1.9636e-06	1.32555
WBGene00001059	dpf-6	15.4608	13.0568	14.5201	6.75021	6.0193	5.97832	11.6998	16.0932	12.9299	11.5661	10.0589	10.6289	5.14253	5.58947	5.09316	9.32114	9.79813	9.43838	11.3162	11.1512	11.2496	6.51143	6.45228	6.68112	10.1783	8.54182	9.26025	dpf-6	-1.19286	-0.0916416	-0.418097	-1.4391	-0.589728	-0.351059	-1.12952	-0.624682	1.93825e-12	2.46064e-11	0.257844	0.503978	3.94705e-05	0.000215155	0.000246233	0.00137502	-1.021	2.99506e-10	3.63743e-09	2.44202
WBGene00001060	dpf-7	70.0458	68.9362	69.407	66.9294	62.9095	65.5903	65.4143	71.8426	74.2956	71.4067	72.5	73.2197	71.044	71.3001	74.4241	72.4713	75.3458	72.5287	70.0963	71.3856	72.1104	73.2527	69.4374	79.6149	72.8859	68.1618	70.5401	dpf-7	-0.09246	0.0180594	0.0592074	0.055711	0.0802887	0.0347398	0.0872824	0.0210525	0.0423342	0.073076	0.67649	0.83777	0.181637	0.285629	0.426411	0.569959	-0.00349643	0.93623	0.960444	-0.059054
WBGene00001061	dpl-1	109.77	112.337	109.003	103.51	99.5692	105.48	112.402	110.913	109.387	105.782	100.093	104.528	106.18	101.715	103.615	109.357	103.137	102.874	108.607	109.506	105.116	107.922	110.078	105.293	111.838	107.459	112.051	dpl-1	-0.101629	0.00749802	-0.0929751	-0.0879278	-0.072073	-0.0345973	-0.0334634	0.000986341	0.00391629	0.00909282	0.816273	0.914417	0.0079197	0.0212781	0.292083	0.433965	0.00504726	0.878984	0.921317	-0.0542861
WBGene00001063	dpy-1	3.2262	2.92065	3.5254	2.5543	2.26852	2.65478	3.5207	3.22382	3.52341	2.96205	3.25362	2.70546	3.4888	2.88746	2.65478	3.03323	2.95636	2.85607	2.76305	2.68755	2.74853	2.56212	2.36419	2.45068	3.71284	2.96761	2.831	dpy-1	-0.371304	0.0848648	-0.124422	-0.103177	-0.131319	-0.23606	-0.390189	-0.0327296	0.0038287	0.00891685	0.432419	0.669079	0.282741	0.403746	0.0488218	0.111301	0.0212444	0.856259	0.905033	-0.170746
WBGene00001064	dpy-2	7.21725	6.17687	6.55433	6.30456	7.82006	7.24766	6.86551	7.0471	6.15075	7.62693	8.8744	8.53368	9.27176	8.49444	8.32236	7.71652	8.72758	8.18876	6.493	6.26269	7.08178	6.83326	6.88783	6.41577	6.91375	7.39931	6.46006	dpy-2	0.0851844	0.00838593	0.324554	0.384688	0.304824	-0.0102347	0.0161133	0.0562695	0.334081	0.421901	0.923908	0.967821	0.000674743	0.00252144	0.908502	0.94394	0.0601336	0.467376	0.585721	0.18528
WBGene00001065	dpy-3	3.25362	2.43714	3.59409	2.26852	2.02224	2.37327	2.8116	2.5805	2.54566	2.89358	3.11199	3.10027	2.70419	3.06061	2.71097	3.44028	3.00031	3.06189	2.58683	2.68755	2.36354	1.85114	1.79983	1.18521	2.50723	2.645	2.17676	dpy-3	-0.464977	-0.213097	-0.0155047	-0.119738	0.0345153	-0.270695	-0.922061	-0.330858	0.00196925	0.00490526	0.104306	0.295704	0.902739	0.936262	0.0472856	0.108353	-0.104233	0.426535	0.548023	6.7227
WBGene00001066	dpy-4	19.3064	19.6159	21.531	36.8776	50.5162	45.6218	22.8248	16.7359	16.0406	22.5342	23.7761	21.2566	31.8017	34.5052	31.7638	17.9229	18.431	17.893	19.4827	20.1031	20.6454	22.5299	25.3297	18.4173	15.2159	17.8752	14.9106	dpy-4	1.11915	-0.131683	0.158747	0.69946	-0.153848	-0.00484928	0.133819	-0.333631	1.57346e-11	1.7317e-10	0.261946	0.508632	0.170351	0.271296	0.966409	0.980696	0.540713	2.34906e-05	0.000114564	3.40613
WBGene00001067	dpy-5	24.5366	20.9297	27.5387	45.457	65.6973	62.8281	28.7808	23.9092	21.8773	26.737	31.0118	31.0346	40.7423	42.2663	39.5515	19.5749	21.8241	20.9602	25.1543	26.2628	23.5436	28.9837	28.8017	25.6459	18.2365	21.4999	18.0776	dpy-5	1.22929	0.0310742	0.286293	0.752428	-0.218986	0.0417194	0.200985	-0.333614	4.69447e-12	5.64604e-11	0.793385	0.903996	0.0199941	0.0470319	0.727132	0.821402	0.466134	0.000204409	0.000804069	1.62817
WBGene00001068	dpy-6	6.8081	6.82029	7.6516	14.8208	14.0456	12.8118	6.82962	7.59268	7.12142	7.71652	8.5995	9.29177	14.1885	13.8949	14.621	7.13063	7.14131	8.05822	8.11648	7.39057	8.28671	11.7413	11.0029	11.1066	7.52851	6.96688	7.55893	dpy-6	0.970418	0.0190645	0.269275	1.00249	0.0750416	0.164343	0.670994	0.0518349	1.63279e-13	2.45725e-12	0.815281	0.913908	0.00215299	0.00694095	0.0494763	0.112394	0.733219	8.52736e-11	1.14007e-09	2.72294
WBGene00001069	dpy-7	6.48269	7.08797	6.94331	5.22897	5.25576	5.75767	6.26952	6.65459	7.10585	7.34873	7.73812	8.0366	6.63491	6.08394	7.06727	7.97295	7.44254	8.92668	6.32596	6.71719	6.81614	5.6634	6.54997	4.12633	6.18212	7.15957	5.85578	dpy-7	-0.335653	-0.0353897	0.177492	-0.0541803	0.250132	-0.0461381	-0.327789	-0.0952131	0.0039933	0.00925677	0.726997	0.864778	0.0851731	0.156795	0.653728	0.765631	-0.231673	0.0300741	0.0641091	-1.30525
WBGene00001070	dpy-8	7.03523	5.66272	6.96339	7.8834	8.9541	9.99593	5.69333	6.94026	7.18181	10.8429	9.57243	11.7873	9.51778	11.9768	11.0202	8.25349	10.8197	8.70605	9.4821	8.24648	8.55367	7.27884	9.29426	8.16362	7.24079	6.92987	7.14485	dpy-8	0.43451	0.00117735	0.711007	0.719262	0.494073	0.421993	0.326445	0.116914	0.00107576	0.0028471	0.992558	0.997121	1.49635e-06	1.2637e-05	0.001472	0.00622773	0.0082546	0.938639	0.962242	0.0116097
WBGene00001071	dpy-9	6.11547	6.34361	6.10235	9.44397	13.1912	10.9376	5.55732	4.99317	5.6139	7.50478	7.03649	7.17757	10.5947	13.5564	12.3528	5.15952	5.86656	6.05891	6.87337	6.26269	5.99562	8.03086	8.5995	6.64483	6.40067	6.64226	5.71647	dpy-9	0.831517	-0.201291	0.226908	0.968073	-0.112188	0.047164	0.33063	0.0151137	1.89573e-08	1.28156e-07	0.106633	0.299855	0.0593661	0.116671	0.690961	0.794486	0.741165	1.38607e-07	1.04479e-06	3.26637
WBGene00001072	dpy-10	13.933	12.675	13.4439	10.9552	11.0631	10.5713	13.4705	13.6609	14.3818	15.8386	17.3782	16.6916	12.0264	15.2965	14.5846	17.9229	17.0457	18.6175	14.6751	13.0228	15.6669	11.7961	12.9827	10.8057	14.9858	14.4465	14.8622	dpy-10	-0.297236	0.0484624	0.315211	0.0560229	0.418232	0.112423	-0.167936	0.143361	0.000825665	0.00223947	0.521459	0.733471	0.000192979	0.000855623	0.14394	0.256944	-0.259188	0.00152076	0.00481798	-0.822268
WBGene00001073	dpy-11	184.845	178.721	176.096	198.052	207.456	199.191	185.165	173.954	172.623	162.521	168.352	163.188	195.039	190.303	193.095	165.684	172.274	167.892	173.68	167.011	167.534	166.822	175.679	168.06	171.35	175.567	176.229	dpy-11	0.16338	-0.0216039	-0.127705	0.099907	-0.0931143	-0.0861901	-0.0798856	-0.0450091	1.03723e-05	4.20781e-05	0.488126	0.711738	0.000326665	0.0013498	0.00958276	0.0293465	0.227612	5.75907e-08	4.65012e-07	-1.78233
WBGene00001074	dpy-13	120.416	113.168	126.209	137.941	167.892	163.696	116.451	87.7169	92.8624	96.086	101.918	98.5673	118.026	116.737	110.629	80.997	84.9811	92.0218	93.0722	101.233	109.003	100.869	104.774	73.9743	91.2878	98.2388	75.8549	dpy-13	0.375938	-0.285222	-0.277974	-0.0580176	-0.477114	-0.250137	-0.370081	-0.445016	0.000530626	0.00150677	0.00796677	0.0599475	0.0102277	0.0264675	0.0186224	0.0509074	0.219956	0.0392157	0.080342	-0.791284
WBGene00001075	dpy-14	16.4138	15.712	16.3295	3.01578	3.16444	3.52667	17.1558	21.8158	21.3896	17.8805	20.3818	18.1147	11.0899	12.0356	11.0772	26.776	22.3556	26.3396	17.2168	16.3955	15.4482	9.53867	9.95131	8.79078	19.67	19.0772	19.3214	dpy-14	-2.32967	0.305272	0.213744	-0.503185	0.631631	0.0179204	-0.774851	0.260195	6.15954e-16	1.40569e-14	0.000380514	0.0112241	0.0103492	0.0267144	0.822346	0.888551	-0.716929	3.30181e-09	3.34359e-08	-3.35415
WBGene00001076	dpy-17	22.6822	21.6702	24.0867	4.7261	5.78797	4.84695	23.2055	20.1004	20.864	15.8386	19.4294	18.3125	9.31011	9.8911	9.45023	25.5907	22.8068	25.3698	17.3847	17.599	15.9134	9.31878	8.87803	7.42896	20.5229	19.7728	19.6142	dpy-17	-2.16172	-0.0941473	-0.355904	-1.2536	0.105155	-0.427264	-1.41085	-0.191659	5.23246e-18	1.72433e-16	0.171928	0.399026	2.86371e-05	0.000162582	1.84859e-06	2.38164e-05	-0.897698	2.85916e-11	4.13448e-10	2.52231
WBGene00001077	dpy-18	70.9932	65.8508	70.8507	319.076	330.676	325.582	70.4961	60.5887	66.5935	73.0206	71.5535	72.9431	231.093	239.577	235.268	79.3485	80.546	81.0073	65.7525	62.4525	61.121	111.214	108.219	98.5989	64.2997	69.3671	65.2479	dpy-18	2.22948	-0.0744725	0.0666533	1.76383	0.214241	-0.132918	0.615031	-0.0629478	1.37679e-29	1.08685e-26	0.126252	0.332668	0.169813	0.270639	0.00962387	0.029436	1.69717	6.27293e-26	2.05551e-23	25.4627
WBGene00001078	dpy-19	6.39336	6.38146	6.76822	7.98339	8.12729	6.4701	6.69605	7.32338	7.84073	7.62693	7.81068	8.46592	10.1171	10.4869	10.4032	8.12729	8.69648	7.62266	7.55527	6.92862	7.08178	9.00907	8.50146	11.5017	7.00205	8.15319	7.81507	dpy-19	0.205876	0.155934	0.292737	0.667248	0.319614	0.144945	0.544936	0.231461	0.0431152	0.0742177	0.118877	0.320233	0.00542952	0.0154759	0.150933	0.266441	0.374511	0.0003045	0.00115087	1.27934
WBGene00001079	dpy-20	0.513777	0.559924	0.447775	0.842509	0.537469	0.780507	0.447775	0.537469	0.786693	1.08663	0.928906	0.93904	0.865354	0.754237	0.66043	0.547709	0.626464	0.772963	0.757749	0.439527	0.663592	0.525336	0.721714	0.62757	0.684565	0.706068	0.662475	dpy-20	0.497316	0.169906	0.950964	0.582854	0.367814	0.283998	0.29887	0.436206	0.051256	0.0859646	0.506186	0.723653	0.00038726	0.00156045	0.269798	0.409751	-0.36811	0.0886197	0.158388	-0.387091
WBGene00001080	dpy-21	46.7705	45.1614	43.4906	49.7575	44.6326	49.3389	41.1799	40.2838	46.2011	53.2977	47.4066	47.2583	50.6015	55.6469	52.427	47.1635	52.3615	59.4083	48.4487	42.9851	45.3181	49.8834	50.1721	48.3346	51.5687	50.7676	48.9457	dpy-21	0.0858486	-0.0899178	0.124321	0.227788	0.231721	0.0156737	0.133399	0.159457	0.197417	0.272728	0.182185	0.412624	0.0672777	0.129206	0.812858	0.882307	0.103467	0.120138	0.202653	0.832252
WBGene00001081	dpy-22	100.521	96.7718	85.6262	101.715	94.6639	97.6721	90.7248	113.305	121.471	115.596	115.88	115.36	143.987	145.087	144.282	120.342	121.368	118.257	112.176	111.295	115.419	128.94	132.543	130.466	114.952	111.531	113.008	dpy-22	0.0590509	0.191792	0.296714	0.618155	0.35002	0.263175	0.473168	0.265747	0.350428	0.438907	0.00409581	0.03949	4.45059e-05	0.000238486	0.000191798	0.00111665	0.321441	9.48362e-06	5.03522e-05	1.08334
WBGene00001082	dpy-23	56.2685	58.5968	54.9789	62.0807	61.5457	63.1129	56.0303	52.4414	54.641	46.9782	49.1656	51.2646	58.2469	58.9831	57.5702	53.0337	52.4414	52.5113	46.8382	50.9184	50.5709	56.9481	56.8825	57.9791	52.9079	53.794	52.2431	dpy-23	0.13779	-0.0578556	-0.202874	0.0429062	-0.103711	-0.197596	0.0169976	-0.0944748	0.000706319	0.00195329	0.125804	0.332032	9.94312e-06	6.50894e-05	1.27679e-05	0.000117075	0.24578	4.82499e-07	3.27839e-06	-1.21149
WBGene00001085	dpy-26	158.899	161.913	154.007	175.338	174.343	170.812	157.617	154.978	151.617	163.611	161.412	164.762	182.776	181.576	190.303	165.263	163.026	161.799	158.267	161.312	162.815	185.452	183.772	183.162	158.32	157.878	160.222	dpy-26	0.133218	-0.0318898	0.0454117	0.223974	0.0456786	0.0229029	0.218945	0.00529481	2.432e-05	9.19386e-05	0.240428	0.48342	0.10009	0.178815	0.396961	0.54177	0.178562	2.47366e-07	1.77009e-06	3.93207
WBGene00001086	dpy-27	58.0042	56.7905	56.306	58.0503	57.4627	56.4384	56.088	65.6421	63.5584	56.2123	60.3111	61.043	70.8889	68.864	69.942	62.9636	64.9545	64.4849	57.6047	60.3958	58.5325	66.2752	70.3735	69.8023	67.5091	59.1902	62.886	dpy-27	0.0073479	0.110556	0.0533209	0.29304	0.169792	0.0435687	0.269668	0.145362	0.879557	0.909675	0.026899	0.128023	0.278313	0.398471	0.371195	0.515848	0.23972	2.39692e-05	0.000116636	4.49579
WBGene00001087	dpy-28	105.039	107.974	103.724	118.226	114.679	111.838	99.9338	124.734	125.94	131.784	123.618	122.183	147.24	147.332	153.17	133.954	130.466	124.734	125.482	126.54	127.797	150.779	143.064	153.28	126.142	122.42	127.127	dpy-28	0.123214	0.137493	0.252622	0.499483	0.295556	0.262401	0.496405	0.246566	0.0298476	0.0540694	0.015895	0.092795	6.1146e-05	0.000314364	3.47206e-05	0.000268506	0.24686	6.09361e-05	0.000271145	0.977191
WBGene00001088	dpy-30	102.213	99.0661	102.701	109.053	109.479	111.393	105.692	92.3727	82.7252	80.6724	84.0133	84.4611	89.9684	82.74	87.297	87.4223	82.813	86.4733	83.144	82.2172	80.5081	91.5866	93.5345	82.6551	87.9434	89.511	77.3522	dpy-30	0.117663	-0.119223	-0.286618	-0.226645	-0.244734	-0.305732	-0.181668	-0.256857	0.0478547	0.0810189	0.0476138	0.181795	4.06467e-05	0.000219758	1.55969e-05	0.0001382	0.059973	0.326928	0.446325	-0.209243
WBGene00001089	dre-1	29.809	30.5104	29.5468	21.873	23.8303	22.8422	27.7969	31.4903	32.5478	35.6926	36.7536	33.9933	23.8061	24.2986	26.3033	36.1131	34.3035	36.437	29.4172	29.4835	28.9032	23.3216	24.8248	24.6803	31.9097	30.2948	28.9085	dre-1	-0.3942	0.0262795	0.242536	-0.275449	0.249872	-0.0331912	-0.305409	0.0196827	8.13473e-08	4.94317e-07	0.614655	0.801034	5.66361e-05	0.000294227	0.5321	0.663886	-0.517985	1.82518e-10	2.30866e-09	-2.1357
WBGene00001090	drh-1	55.2137	55.2911	60.3209	60.6181	61.0326	63.2048	54.7106	65.5346	63.932	65.9952	66.4041	66.6036	68.7581	70.7397	75.3998	72.3814	73.7221	69.6381	64.0561	67.6911	62.7866	67.3469	68.8163	78.8499	65.5657	62.9095	70.4561	drh-1	0.114169	0.10408	0.221586	0.330584	0.337011	0.187053	0.325191	0.219041	0.062271	0.101622	0.0862279	0.262861	0.000759047	0.00279702	0.00341068	0.0125362	0.108998	0.068797	0.128335	0.491897
WBGene00001091	drh-2	26.7694	24.7793	24.7793	45.0925	46.2847	45.9121	27.1301	34.6778	34.4138	38.2241	38.7829	38.0022	52.3227	52.6562	54.542	57.7851	60.7016	58.4872	31.4903	32.1426	30.6701	48.0044	48.4541	55.3155	48.5049	48.5532	54.7329	drh-2	0.846599	0.32204	0.591009	1.06333	1.21441	0.30405	0.984203	0.989419	4.83251e-13	6.72485e-12	8.06875e-05	0.00531187	2.62759e-09	4.71907e-08	0.000181349	0.00106618	0.472324	3.58078e-08	2.99266e-07	0.799183
WBGene00001092	dro-1	56.1888	56.5462	53.6861	52.697	52.7728	49.6393	54.9789	50.0922	49.0218	52.427	50.2	53.2201	53.0898	54.18	49.3467	48.0414	51.5252	55.2315	50.4478	52.2254	51.04	51.3243	51.9321	49.8115	50.8801	54.3207	54.017	dro-1	-0.100438	-0.11074	-0.0934049	-0.0865917	-0.101393	-0.11464	-0.118418	-0.0638029	0.0426845	0.0736002	0.0258317	0.12472	0.0601889	0.11786	0.0223739	0.0592237	0.00681315	0.888892	0.928676	-0.0729422
WBGene00001093	drp-1	149.993	148.589	150.623	167.991	167.179	162.521	147.195	167.179	169.746	297.01	291.251	286.29	199.801	195.251	199.513	184.845	183.108	177.746	233.967	241.269	229.561	191.61	194.22	203.912	173.954	168.898	181.785	drp-1	0.147984	0.104033	0.960832	0.404267	0.279755	0.649289	0.39103	0.22299	0.000730722	0.00201244	0.0125413	0.0790578	4.73315e-21	7.98064e-19	2.07936e-16	3.1402e-14	-0.556565	4.74083e-15	1.35641e-13	-0.579253
WBGene00001094	dars-1	265.627	261.392	264.67	262.397	257.63	256.629	264.365	277.706	274.096	277.706	282.744	275.758	265.947	271.159	267.88	291.982	289.617	284.862	274.096	276.47	274.474	253.238	261.392	259.711	276.324	284.236	283.556	dars-1	-0.0275303	0.0433375	0.07851	0.023912	0.129534	0.0592674	-0.0323992	0.0922694	0.264157	0.347389	0.081415	0.255269	0.00295792	0.00916507	0.0201262	0.054082	-0.0545981	0.0320551	0.0677088	-0.695428
WBGene00001095	dars-2	27.7969	29.6441	26.9971	29.1514	24.6912	27.0078	27.043	31.4287	33.0662	37.8449	37.0069	37.4721	30.9694	32.3187	34.4612	34.1227	34.3735	32.4176	34.8175	34.9578	37.695	36.2748	32.6583	37.4478	31.9097	31.926	33.7582	dars-2	-0.0597309	0.110873	0.414401	0.210954	0.257648	0.349174	0.329775	0.210738	0.374454	0.463682	0.095831	0.280454	4.17535e-07	4.18186e-06	6.63833e-06	6.85829e-05	-0.203447	0.00292545	0.00859374	-0.490942
WBGene00001099	dsc-4	72.5407	71.1949	70.1621	47.5311	49.6879	50.5912	66.2752	59.5001	60.4203	55.8215	57.1501	57.3708	41.5248	40.1502	39.7633	52.1752	52.9475	48.7759	55.9626	58.0605	59.5428	37.4025	37.0118	39.6195	50.6602	48.5134	47.9594	dsc-4	-0.535745	-0.201337	-0.328756	-0.817364	-0.478197	-0.30338	-0.911614	-0.540622	1.78274e-13	2.6553e-12	2.01448e-05	0.00264588	7.39328e-09	1.19999e-07	2.88964e-08	7.28093e-07	-0.488608	6.79281e-12	1.10771e-10	1.48623
WBGene00001101	dsh-1	25.4007	24.9459	24.7793	25.5955	27.1103	25.7551	26.5388	27.9356	29.4131	27.2146	26.9645	25.614	30.3294	31.0577	29.9495	29.1101	27.5865	28.847	25.6776	25.7795	24.8834	27.9475	28.1591	29.8236	27.9127	25.785	26.8971	dsh-1	0.0607026	0.155847	0.0844407	0.282253	0.185846	0.022572	0.190259	0.100103	0.188112	0.26202	0.00146347	0.0218588	0.0731033	0.138435	0.62212	0.739539	0.197813	0.000124594	0.000516179	2.34262
WBGene00001102	dsh-2	91.5636	94.4673	94.0187	95.9328	97.6851	96.0069	89.0219	92.0218	96.702	98.6946	98.2388	96.481	107.713	105.565	109.91	102.952	102.229	100.185	98.3766	99.3815	99.9182	106.923	109.418	104.213	99.3815	100.385	103.51	dsh-2	0.0487673	-0.0132141	0.0673391	0.206654	0.124666	0.0883196	0.196026	0.115142	0.125259	0.18577	0.671766	0.835235	0.0384863	0.0814416	0.00775068	0.0246712	0.139315	9.97912e-05	0.000423424	2.06886
WBGene00001103	dsl-1	1.32637	1.29609	1.49699	0.541228	0.567005	0.366258	1.32981	1.32981	1.56565	0.918312	0.735531	1.05985	0.834263	0.754237	0.513777	1.64961	0.721714	1.44595	0.902609	0.98921	1.0519	0.559924	0.623883	0.75067	1.00788	1.52847	1.07803	dsl-1	-1.50124	0.028625	-0.607876	-0.987807	-0.21237	-0.492122	-1.11576	-0.20783	6.09514e-05	0.000210945	0.88809	0.949954	0.0188759	0.0447706	0.0412589	0.0974888	-0.379931	0.183713	0.284921	0.625014
WBGene00001104	dsl-2	8.4377	7.90221	9.20793	7.09938	6.36966	6.38265	9.64002	6.4588	7.42447	6.58415	7.66331	6.59015	8.48379	8.64852	9.16801	7.67168	7.82674	8.25755	6.73317	6.53841	6.81614	8.73388	8.50146	8.21758	7.91786	9.20685	7.93834	dsl-2	-0.358468	-0.135467	-0.297407	0.0407102	-0.100306	-0.343601	-0.0013773	-0.028653	0.00130416	0.00338556	0.166393	0.39146	0.0063314	0.0176073	0.00189813	0.00764819	0.338117	0.00235073	0.00708647	-1.13688
WBGene00001105	dsl-3	4.07023	3.07851	4.0269	1.30578	1.38094	1.72903	3.62644	3.40989	3.17521	2.92438	3.71284	3.44091	1.99152	2.06656	2.17195	4.24504	3.3636	3.58123	2.65996	2.48579	2.6424	2.303	2.2342	2.2231	2.65478	2.99919	3.27372	dsl-3	-1.35735	-0.125595	-0.151198	-0.843003	-0.012835	-0.516092	-0.72174	-0.327	2.20453e-09	1.72771e-08	0.269264	0.516491	0.200316	0.308658	0.000249615	0.00138989	-0.691805	1.87571e-05	9.32861e-05	4.57547
WBGene00001108	dsl-6	0.877423	1.29609	1.22806	0.129589	0.11646	0.12278	1.29959	1.32981	1.52738	0.883033	1.38446	1.15263	0.376178	0.573975	0.66043	1.73755	1.18748	1.74784	0.935404	0.907391	0.590267	0.309995	0.557617	0.589117	1.08565	1.24103	1.35584	dsl-6	-3.21842	0.315451	0.0167272	-1.10609	0.466837	-0.480764	-1.28293	0.141605	3.49109e-06	1.55941e-05	0.126493	0.33286	0.938898	0.961089	0.0542739	0.120626	-1.12282	0.000449545	0.00163014	-67.1255
WBGene00001109	dsl-7	0.404605	0.633246	0.179976	0.94401	1.22091	1.18946	0.378342	0.47777	0.374786	0.609498	0.735531	0.346131	1.07009	1.37319	1.0047	0.589691	0.476665	0.567005	0.324738	0.515529	0.409693	1.08916	0.939661	1.18521	0.363901	0.378342	0.62757	dsl-7	1.66451	0.205031	0.580469	1.72179	0.616146	0.186126	1.60354	0.316716	3.10265e-05	0.000114524	0.578172	0.773227	0.111148	0.194294	0.617082	0.735645	1.14132	0.000696635	0.00241149	1.9662
WBGene00001110	duo-1	42.7124	42.6292	44.0308	44.2181	40.7684	41.68	41.9241	47.9901	47.5615	51.9103	50.3261	49.8115	51.6924	48.0091	52.6468	49.4766	49.6469	49.1938	48.8322	51.1505	48.0514	54.8577	50.9878	56.7412	49.2305	48.1727	50.4005	duo-1	-0.0293382	0.083847	0.232324	0.233789	0.197145	0.193126	0.325884	0.191871	0.551985	0.63452	0.0907447	0.271396	4.06529e-05	0.000219758	0.000366374	0.00192579	0.00146453	0.97549	0.98562	0.00630383
WBGene00001111	duo-2	0.341222	0.269248	0.246492	0.490807	0.623883	0.392683	0.314909	0.373631	0.412165	0.513777	0.374786	0.536143	0.28854	0.909788	0.374208	0.469577	0.476665	0.356884	0.699597	0.479036	0.590267	0.707884	0.557617	0.547709	0.616643	0.479036	0.423735	duo-2	0.788638	0.350055	0.724264	0.707998	0.580763	1.0422	1.07687	0.807749	0.0328609	0.0587982	0.344803	0.589969	0.0515398	0.103996	0.00550678	0.0186607	-0.0162658	0.959613	0.976208	-0.0224584
WBGene00001112	duo-3	100.567	102.457	95.6156	95.6736	91.6638	90.1405	97.8945	109.506	111.295	107.682	106.923	106.18	105.67	109.111	108.671	108.241	111.317	103.566	104.933	106.57	104.774	107.339	107.169	111.582	107.111	106.389	106.231	duo-3	-0.104612	0.0913223	0.103856	0.115814	0.113181	0.0833624	0.126448	0.0993464	0.0119211	0.0242913	0.0237825	0.118644	0.0117836	0.0298447	0.0386429	0.0921476	0.0119577	0.758346	0.833082	0.115137
WBGene00001113	dur-1	16.7718	16.2282	15.6164	25.2256	26.8334	27.8118	16.9926	15.6345	15.8919	19.31	17.6197	20.7571	20.682	22.6575	20.22	18.1363	19.3064	18.907	19.1739	17.0714	18.9098	18.8135	19.7728	16.2978	16.2978	19.4352	18.6879	dur-1	0.710266	-0.00295698	0.24667	0.385587	0.214359	0.183305	0.178168	0.158365	5.52209e-11	5.5853e-10	0.968539	0.98672	0.00224543	0.00721221	0.0184736	0.0505847	0.138917	0.0604579	0.115687	0.56317
WBGene00001115	dyb-1	8.69033	9.14441	10.0364	8.97161	8.9905	8.47188	8.42706	9.91455	9.51714	10.1318	8.94567	10.4786	12.1752	10.9353	10.2815	10.2946	10.53	10.6564	8.8369	9.55047	10.4197	10.3597	10.1487	11.5989	9.45682	10.5719	9.5603	dyb-1	-0.0720346	-0.00154817	0.0880428	0.263383	0.181073	0.0442826	0.19945	0.0892287	0.390978	0.480275	0.984885	0.994388	0.290721	0.412328	0.590314	0.713976	0.17534	0.0372278	0.0768677	1.99153
WBGene00001116	dyc-1	8.36286	8.68542	7.27838	6.81927	6.44004	7.58571	7.85445	9.18132	8.38139	9.54239	8.94567	9.2503	8.84646	9.12124	8.28492	9.06381	10.6589	8.98478	9.15163	8.1053	9.1127	8.28671	8.21758	7.57814	9.35621	8.23765	8.2081	dyc-1	-0.221384	0.0657566	0.194112	0.11605	0.240759	0.123279	-0.00547607	0.0873203	0.0177931	0.0344239	0.43598	0.672211	0.0274385	0.0615347	0.150727	0.26621	-0.0780612	0.355714	0.476343	-0.402146
WBGene00001117	dyf-1	1.57443	1.86386	1.43741	2.19445	2.2947	1.70285	1.4621	1.85052	1.94926	2.10828	1.75873	1.77533	2.73262	2.72702	2.44944	1.96773	1.69414	2.12392	1.458	1.79789	1.74662	2.75568	1.95375	2.2231	1.98215	1.58681	1.74398	dyf-1	0.353009	0.106899	0.216101	0.715057	0.256867	0.0343603	0.508724	0.131033	0.0309571	0.0558289	0.508086	0.724992	0.189188	0.295152	0.835025	0.897507	0.498956	0.00237957	0.00716079	2.3089
WBGene00001118	dyf-2	3.5658	4.15302	5.11824	4.90082	5.9102	5.54316	5.10263	5.2935	4.80621	4.90898	4.41827	4.8271	6.12062	5.55842	6.60716	4.96275	4.69479	5.89837	3.96059	4.58318	5.22718	7.1168	6.45228	5.67804	4.54641	4.47646	5.17294	dyf-2	0.358622	0.265596	0.160687	0.523786	0.29794	0.104543	0.607299	0.160986	0.00603757	0.0133386	0.037111	0.155528	0.212035	0.322651	0.41108	0.555651	0.3631	0.00518366	0.0141995	2.25967
WBGene00001119	dyf-3	8.14437	9.33587	9.61259	9.80375	11.1878	10.9174	9.24679	7.9633	7.57936	7.74925	7.99066	8.79078	10.8057	11.01	10.4032	9.14824	7.99425	9.55317	9.18132	9.47547	8.25755	10.6527	10.9393	9.62989	9.05533	8.63804	8.05705	dyf-3	0.235899	-0.122239	-0.134077	0.257789	-0.0175907	-0.0047134	0.215377	-0.0669903	0.0075316	0.0162264	0.164058	0.388386	0.138538	0.230946	0.956144	0.974836	0.391865	0.000100341	0.000425444	-2.92269
WBGene00001121	dyf-5	1.01361	0.884456	0.884456	0.786693	0.782896	0.884456	0.447775	0.942246	0.97068	0.702891	0.698364	0.698364	0.781823	0.702891	0.868797	0.851439	0.851439	0.689154	0.729335	0.826354	0.768794	1.12065	1.24411	0.872637	1.08565	0.778434	0.662475	dyf-5	-0.189471	-0.338976	-0.410624	-0.255413	-0.239566	-0.270138	0.218876	-0.170619	0.399215	0.488354	0.143431	0.358361	0.0970663	0.174274	0.242025	0.379002	0.155212	0.53455	0.647658	-0.377989
WBGene00001122	dyf-6	1.18846	1.29609	1.37149	1.1086	0.814351	0.915166	1.99474	1.22271	1.34248	1.55997	1.24967	1.77533	1.15263	1.12379	1.4621	1.92819	1.53086	1.77533	1.67735	1.72157	1.84394	1.19002	1.43741	1.29495	1.4346	1.43608	1.85052	dyf-6	-0.434889	0.219104	0.24944	-0.0574491	0.432125	0.445016	0.027214	0.283402	0.0413801	0.0716785	0.221675	0.462437	0.173783	0.275674	0.0148949	0.0421441	-0.306889	0.104873	0.181825	-1.23031
WBGene00001123	dyf-7	3.36725	2.92065	2.60703	1.5772	1.22091	1.27491	3.49318	2.92311	3.3307	2.5805	2.809	2.7406	1.61495	1.73029	1.76998	3.71384	3.41441	3.02853	2.2097	2.40449	3.30239	1.88769	2.26921	1.53418	3.1907	3.03438	3.07979	dyf-7	-1.1177	0.130443	-0.125563	-0.795219	0.179054	-0.193287	-0.639071	0.0681821	5.24904e-07	2.7683e-06	0.305246	0.553016	0.358273	0.484024	0.160185	0.278693	-0.669655	0.000197445	0.000779502	5.33321
WBGene00001127	dyf-11	0.545169	0.781823	0.615502	0.765711	0.423735	0.864249	0.610753	0.746402	0.567005	0.737968	0.500479	0.728255	0.781823	0.754237	0.571235	0.589691	0.66043	0.598681	0.63562	0.67057	0.663592	0.814351	0.833198	0.708856	0.543824	0.636929	0.698364	dyf-11	0.0565135	0.0115311	0.0328112	0.140894	-0.0406539	0.0465317	0.312999	-0.027653	0.809616	0.854904	0.96061	0.983555	0.891092	0.928851	0.842989	0.902431	0.108083	0.650874	0.749187	3.29408
WBGene00001129	dyf-13	0.580219	0.744512	0.447775	0.842509	0.648205	0.62757	0.511421	0.439527	0.44916	0.777282	0.801822	0.506477	0.597377	0.702891	0.458477	0.511421	0.626464	0.598681	0.757749	0.746979	0.513777	0.413184	0.786693	0.669264	0.651577	0.513777	0.559924	dyf-13	0.297794	-0.301067	0.225854	0.0179471	0.0155395	0.20912	0.0590205	-0.00776371	0.240193	0.321473	0.281576	0.530385	0.380258	0.505894	0.413269	0.557718	-0.207906	0.425726	0.547227	-0.920537
WBGene00001130	dyn-1	93.0442	98.4949	102.813	103.748	101.888	108.703	99.8313	122.791	123.546	107.974	116.767	118.641	127.127	119.352	125.165	122.459	119.182	124.033	111.034	114.361	118.435	127.321	130.747	125.999	116.706	117.794	117.105	dyn-1	0.0957936	0.22745	0.223775	0.337477	0.314819	0.224883	0.386086	0.258352	0.0900023	0.139885	0.000228834	0.00889075	0.000306751	0.00127815	0.00027496	0.00151019	0.113702	0.0428309	0.0866447	0.508108
WBGene00001131	dys-1	88.0022	87.4223	78.0107	77.3427	78.7882	77.721	75.4147	95.116	104.528	97.6851	101.802	99.3588	110.977	109.26	107.357	96.9085	97.5023	102.297	98.2233	97.14	95.8368	96.9982	98.6437	94.7287	99.0433	98.3477	102.094	dys-1	-0.114213	0.103882	0.239681	0.3726	0.230334	0.20274	0.199062	0.242679	0.0902978	0.140256	0.114196	0.312688	0.000795944	0.00291689	0.00351175	0.0128478	0.132918	0.0428179	0.0866284	0.554562
WBGene00001132	alp-1	93.9401	96.1395	92.3875	72.9864	78.6803	78.8499	98.657	94.4503	99.4015	103.96	103.776	98.975	83.9859	82.5351	80.4136	120.085	123.217	119.759	98.1592	96.4192	97.6721	83.1057	81.8424	79.489	95.9147	102.057	100.709	alp-1	-0.295478	0.0501324	0.118149	-0.193325	0.362617	0.0498574	-0.207467	0.0805691	3.11056e-09	2.38609e-08	0.149487	0.366894	0.00167925	0.00558475	0.153777	0.270089	-0.311474	8.97305e-10	1.0028e-08	-2.63628
WBGene00001133	eat-2	0.760427	0.633246	0.754237	0.94401	0.841534	0.748237	0.542482	0.706068	0.412165	0.84371	0.470739	0.728255	0.999031	0.781823	0.59979	0.427577	0.346131	0.44407	0.59979	0.479036	0.549909	0.631653	0.51895	0.669264	0.760427	0.44407	0.347299	eat-2	0.238912	-0.385683	-0.10516	0.126434	-0.812949	-0.388187	-0.248542	-0.538073	0.315252	0.401598	0.1532	0.372635	0.682164	0.772505	0.157896	0.275707	0.231594	0.36772	0.488204	-2.20229
WBGene00001134	eat-3	132.323	132.401	125.134	126.209	120.984	119.247	124.25	139.597	147.285	149.109	153.776	147.61	136.806	137.987	140.558	138.033	139.303	133.998	145.334	145.433	148.217	137.347	138.984	147.039	135.326	134.271	140.19	eat-3	-0.0884239	0.0721592	0.208526	0.0915919	0.0771582	0.171616	0.11742	0.0720394	0.0439549	0.0754537	0.0917812	0.273173	2.42986e-05	0.000140853	0.000272007	0.00149776	-0.116935	0.0085257	0.0218322	-0.560766
WBGene00001135	eat-4	2.303	3.18438	3.24286	1.9849	1.95317	2.18712	2.92188	3.6494	3.59914	2.83357	3.21749	2.40449	2.1882	2.34345	2.51624	2.09113	2.60803	2.47919	2.92065	3.0902	2.28996	2.68755	2.66749	2.5241	2.16333	2.2947	1.92566	eat-4	-0.49068	0.236868	-0.0388162	-0.288288	-0.251911	-0.0582391	-0.12013	-0.428146	0.00283569	0.00679931	0.0762017	0.244849	0.780585	0.850518	0.673412	0.780718	-0.249472	0.0982991	0.172471	6.427
WBGene00001136	eat-5	1.70849	1.49143	1.56801	1.19311	1.65219	1.79789	1.60137	1.85052	1.458	2.14845	1.86386	1.74784	1.4832	1.37319	1.4949	1.19181	1.79	1.48195	2.09175	2.21743	2.32654	1.70285	1.95375	2.2947	2.05958	1.87337	2.02341	eat-5	-0.0822554	0.0386428	0.260118	-0.138086	-0.101782	0.47176	0.294116	0.318428	0.607518	0.683384	0.803434	0.908769	0.0973425	0.174721	0.00310458	0.0115677	-0.398204	0.0176279	0.0406081	-1.53086
[truncated: 16,473 more rows]
[truncated: 5 more columns]

## Sheet: Up after cco-1 RNAi(1241)
Gene ID	Symbol	ev_1	ev_2	ev_3	cbp-1_1	cbp-1_2	cbp-1_3	atfs-1_1	atfs-1_2	atfs-1_3	cco-1+ev_1	cco-1+ev_2	cco-1+ev_3	cco-1+cbp-1_1	cco-1+cbp-1_2	cco-1+cbp-1_3	cco-1+atfs-1_1	cco-1+atfs-1_2	cco-1+atfs-1_3	mrps-5+ev_1	mrps-5+ev_2	mrps-5+ev_3	mrps-5+cbp-1_1	mrps-5+cbp-1_2	mrps-5+cbp-1_3	mrps-5+atfs-1_1	mrps-5+atfs-1_2	mrps-5+atfs-1_3	Gene group
[truncated: 1,241 more rows]

## Sheet: CBP-1- & ATFS-1-dependent(259)
Gene ID	Symbol	ev_1	ev_2	ev_3	cbp-1_1	cbp-1_2	cbp-1_3	atfs-1_1	atfs-1_2	atfs-1_3	cco-1+ev_1	cco-1+ev_2	cco-1+ev_3	cco-1+cbp-1_1	cco-1+cbp-1_2	cco-1+cbp-1_3	cco-1+atfs-1_1	cco-1+atfs-1_2	cco-1+atfs-1_3	mrps-5+ev_1	mrps-5+ev_2	mrps-5+ev_3	mrps-5+cbp-1_1	mrps-5+cbp-1_2	mrps-5+cbp-1_3	mrps-5+atfs-1_1	mrps-5+atfs-1_2	mrps-5+atfs-1_3	Gene group
[truncated: 259 more rows]

[truncated: 3 more sheets: Only CBP-1 dependent(247), Only ATFS-1 dependent(145), Heat-map(24)_Fig. 1j]
