# Supplementary material for: A conserved role of CBP/p300 in mitochondrial stress response and longevity
Source: Research Square preprint supplement (doi:10.21203/rs.3.rs-86465/v1), 2020-10-14
Supplement: Supplementary file 4 [file de4514bb466bd710aae28ab1.xlsx]

## Sheet: Key Notes
Supplementary Table 2. Impact of cbp-1 RNAi on the expression of down-regulated genes after cco-1 RNAi
Gene ID	Wormbase Gene ID
Symbol	Gene name
X_1	Normalized counts for given Condition_X (see below), replicate 1 of 3
X_2	Normalized counts for given Condition_X (see below), replicate 2 of 3
X_3	Normalized counts for given Condition_X (see below), replicate 3 of 3
X_logFC	Log2 of the fold change for given Condition_X (see below) relatively to Condition_ev
X_P-value	P-value for the comparasion of Condition_X (see below) versus Condition_ev (Limma-Voom)
Adjust_P-value	Benjamini-Hochberg adjusted P-value
Treatment Conditions:
ev	Worms grown on empty vector (ev) RNAi (100%) bacteria
cbp-1	Worms grown on cbp-1 RNAi (25%) bacteria + ev RNAi (75%) bacteria
atfs-1	Worms grown on atfs-1 RNAi (50%) bacteria + ev RNAi (50%) bacteria
cco-1+ev	Worms grown on cco-1 RNAi (50%) bacteria + ev RNAi (50%) bacteria
cco-1+cbp-1	Worms grown on cco-1 RNAi (50%) bacteria + cbp-1 RNAi (25%) bacteria + ev RNAi (25%) bacteria
cco-1+atfs-1	Worms grown on cco-1 RNAi (50%) bacteria + atfs-1 RNAi (50%) bacteria
mrps-5+ev	Worms grown on mrps-5 RNAi (50%) bacteria + ev RNAi (50%) bacteria
mrps-5+cbp-1	Worms grown on mrps-5 RNAi (50%) bacteria + cbp-1 RNAi (25%) bacteria + ev RNAi (25%) bacteria
mrps-5+atfs-1	Worms grown on mrps-5 RNAi (50%) bacteria + atfs-1 RNAi (50%) bacteria

## Sheet: Down after cco-1 RNAi(1354)
Gene ID	Symbol	ev_1	ev_2	ev_3	cbp-1_1	cbp-1_2	cbp-1_3	atfs-1_1	atfs-1_2	atfs-1_3	cco-1+ev_1	cco-1+ev_2	cco-1+ev_3	cco-1+cbp-1_1	cco-1+cbp-1_2	cco-1+cbp-1_3	cco-1+atfs-1_1	cco-1+atfs-1_2	cco-1+atfs-1_3	mrps-5+ev_1	mrps-5+ev_2	mrps-5+ev_3	mrps-5+cbp-1_1	mrps-5+cbp-1_2	mrps-5+cbp-1_3	mrps-5+atfs-1_1	mrps-5+atfs-1_2	mrps-5+atfs-1_3	Gene ID	cbp-1_logFC	atfs-1_logFC	cco-1_logFC	cco-1+cbp-1_logFC	cco-1+atfs-1_logFC	mrps-5_logFC	mrps-5+cbp-1_logFC	mrps-5+atfs-1_logFC	cbp-1_P.Value	cbp-1_adj.P.Val	atfs-1_P.Value	atfs-1_adj.P.Val	cco-1_P.Value	cco-1_adj.P.Val	mrps-5_P.Value	mrps-5_adj.P.Val
WBGene00000002	aat-1	14.0527	14.0026	14.3356	6.70522	6.83326	7.35737	13.1912	14.9347	14.9146	7.20659	8.38448	6.9541	6.60359	6.84054	7.20357	6.2276	6.15075	5.20544	11.0273	10.589	10.8016	8.28671	8.72148	8.62937	8.69531	8.91461	7.90221	aat-1	-1.02783	0.0176846	-0.922877	-1.04375	-1.28727	-0.387236	-0.729798	-0.735556	5.76345e-14	9.27653e-13	0.773894	0.891935	7.11811e-13	2.55942e-11	2.38274e-06	2.93483e-05
WBGene00000005	aat-4	14.0287	15.7458	15.5653	7.62266	6.76822	7.21725	14.4089	15.7784	16.0406	8.71968	9.28782	8.25755	5.93655	5.45026	6.30804	6.321	6.58294	7.0166	11.9888	12.6693	13.3547	8.54553	8.45043	8.44856	10.903	11.0595	12.1397	aat-4	-1.06441	0.0292958	-0.788864	-1.36082	-1.18017	-0.254103	-0.830335	-0.409318	1.90869e-14	3.37558e-13	0.62777	0.809013	8.36511e-12	2.53096e-10	0.000378139	0.00198104
WBGene00000008	aat-7	1.41213	1.86386	1.53179	0.160002	0.204483	0.0899412	1.76935	2.2947	1.42184	0.609498	0.833198	1.00214	0.175358	0.140385	0.252514	0.427577	0.284702	0.413184	1.51896	1.60137	1.80885	0.204483	0.234285	0.26335	1.15263	0.636929	0.942246	aat-7	-3.46231	0.193206	-0.973609	-3.12216	-2.10843	0.0468846	-2.77705	-0.844226	5.52212e-07	2.89474e-06	0.271084	0.51855	0.000358831	0.00146184	0.794352	0.869611
WBGene00000009	aat-8	0.760427	1.00337	0.754237	0.514968	0.567005	0.567005	0.573975	0.781823	0.934651	0.513777	0.274186	0.409693	0.482202	0.367495	0.628795	0.27634	0.314909	0.240311	0.669264	0.867561	0.37194	0.377175	0.447775	0.306282	0.479036	0.412165	0.729335	aat-8	-0.603847	-0.157758	-1.11122	-0.804663	-1.61336	-0.473252	-1.15393	-0.671993	0.0355248	0.0628973	0.517961	0.731293	0.00201007	0.00654093	0.0848899	0.170746
WBGene00000012	abf-1	1.25092	1.40723	0.851439	0.269248	0.401299	0.308848	1.11448	0.746402	0.826967	0.275204	0.833198	0.227103	0.513777	0.115381	0.484815	0.664084	0.439527	0.567005	0.355563	0.746979	0.34017	0.559924	0.481012	0.467086	0.439527	0.573975	0.559924	abf-1	-1.88449	-0.37506	-1.68066	-1.9716	-1.095	-1.40752	-1.21742	-1.15613	0.000311088	0.000930692	0.198317	0.432699	0.000674474	0.00252122	0.00124776	0.00541475
WBGene00000013	abf-2	0.609498	0.924219	0.819985	1.86496	1.74662	2.21743	0.610753	0.571235	0.826967	0.204483	0.470739	0.536143	1.50479	1.37319	1.27491	0.589691	0.476665	0.598681	0.819985	1.02501	0.883744	1.40723	2.02341	2.2231	1.00788	0.741324	0.876408	abf-2	1.34587	-0.228978	-1.04116	0.862964	-0.483475	0.233418	1.26824	0.181438	1.28451e-06	6.27514e-06	0.381672	0.625448	0.00444255	0.0130415	0.338038	0.4816
WBGene00000056	acr-17	1.57443	1.52793	1.67735	0.992178	0.917178	1.0047	1.29959	1.25609	1.67381	0.609498	0.801822	0.87529	1.04747	0.936158	0.948213	1.04526	1.29959	1.21588	0.84371	1.10134	0.768794	0.707884	0.786693	1.15016	1.35842	1.52847	1.00664	acr-17	-0.716218	-0.198621	-1.07575	-0.708855	-0.421651	-0.846587	-0.915801	-0.313468	0.000542617	0.0015373	0.219324	0.459323	2.32463e-05	0.000135658	0.000129769	0.000806044
WBGene00000063	act-1	273.248	253.474	272.54	246.776	247.715	243.683	281.106	134.951	134.405	135.422	138.765	144.551	127.947	117.224	108.219	124.214	135.326	141.367	135.688	136.164	145.86	122.977	126.857	107.974	145.746	140.19	118.707	act-1	-0.114257	-0.624709	-0.930739	-1.17776	-0.992925	-0.935698	-1.1572	-0.985497	0.411638	0.5008	0.000130123	0.00673113	6.39363e-07	6.03468e-06	5.30194e-07	8.57344e-06
WBGene00000072	add-1	11.1655	11.99	12.6559	14.0812	12.3415	13.387	11.1412	13.2601	12.5845	7.34873	7.06727	7.9694	12.6939	11.6659	11.9648	5.7023	5.83652	5.31176	9.98112	9.99339	9.64285	14.7554	13.6997	14.326	11.2723	10.333	10.8441	add-1	0.157681	0.0453113	-0.672667	0.0232324	-1.08793	-0.270255	0.258978	-0.139941	0.0231187	0.0433682	0.498171	0.718743	1.78523e-09	3.31949e-08	0.000615988	0.00301009
WBGene00000112	alh-6	115.562	118.356	118.641	136.197	142.821	136.84	115.389	94.4503	92.1688	75.4652	80.7598	81.8297	95.422	95.0764	89.4969	68.6575	71.3001	73.7085	96.5201	101.614	99.7501	108.072	111.255	103.305	89.6779	89.6779	84.3628	alh-6	0.237772	-0.228407	-0.565713	-0.331692	-0.720104	-0.243762	-0.126461	-0.418526	6.83592e-05	0.000234022	0.000154607	0.00729637	3.8738e-11	1.0132e-09	7.54924e-05	0.000515766
WBGene00000116	alh-10	36.3046	37.4394	34.9997	50.4701	52.7326	52.2742	36.1308	37.2006	36.5876	24.837	26.3432	24.837	32.3623	31.5453	31.7968	28.6452	27.3218	27.3979	30.1787	29.2827	29.7762	40.0023	37.1815	39.0967	35.3962	31.9678	34.6537	alh-10	0.515884	0.0165407	-0.517415	-0.183426	-0.385121	-0.283686	0.0962739	-0.0929991	1.32805e-13	2.01434e-12	0.687024	0.842966	2.87891e-12	9.37377e-11	2.94566e-07	5.27394e-06
WBGene00000118	alh-12	76.3621	74.3863	72.1508	57.4691	55.0681	54.4551	75.6411	84.3476	86.6631	47.5233	50.5424	47.6694	48.7878	49.5101	49.906	49.6469	50.4768	48.9684	61.1848	60.4974	59.2315	62.1049	56.6166	58.0503	70.4152	73.0707	76.3914	alh-12	-0.415684	0.142384	-0.614169	-0.589047	-0.580529	-0.300799	-0.335059	-0.0206925	3.22953e-10	2.90007e-09	0.00196838	0.0254542	8.25798e-14	3.46416e-12	1.64573e-07	3.2442e-06
WBGene00000136	amt-4	34.9091	31.7538	34.8838	6.48395	6.53476	6.96237	29.2556	30.3027	32.2559	19.7879	21.7711	23.5488	5.53559	5.35478	5.0661	10.4186	11.7448	11.8265	35.5158	35.7814	34.8702	5.8672	5.90222	5.34911	25.9421	23.7761	24.4803	amt-4	-2.34135	-0.148427	-0.639993	-2.6613	-1.57108	0.0637339	-2.55632	-0.453425	3.97133e-22	2.63685e-20	0.00659648	0.0532594	3.90887e-12	1.23428e-10	0.211291	0.342207
WBGene00000139	amx-3	6.321	6.64483	5.99745	4.60991	4.00705	3.89605	6.35816	5.68644	5.5691	4.47006	4.07501	4.2026	4.09664	3.43118	3.27372	3.93833	3.41441	3.54658	5.52212	5.08491	5.86783	3.90772	4.95286	5.41867	4.97142	4.64922	5.54717	amx-3	-0.594839	-0.10417	-0.573038	-0.81455	-0.807028	-0.20096	-0.43122	-0.325628	3.90204e-06	1.72522e-05	0.272593	0.520089	8.53533e-06	5.71006e-05	0.0453695	0.104862
WBGene00000157	aps-2	16.7122	16.9985	17.7586	16.6789	17.5882	17.0811	17.8476	12.2021	13.8725	10.1992	10.668	10.7979	14.7821	14.0128	14.3992	11.2235	11.2658	10.5719	10.9953	10.686	10.4546	14.2565	14.3903	14.9146	11.843	12.7435	13.082	aps-2	-0.00437362	-0.244448	-0.699786	-0.252796	-0.641194	-0.678128	-0.242182	-0.451252	0.953144	0.96588	0.00314887	0.033757	5.10766e-09	8.6121e-08	6.33798e-09	1.90766e-07
WBGene00000178	aqp-10	45.4186	49.4253	49.6263	44.3105	45.2442	43.4705	51.1651	45.4924	41.8596	28.952	30.3347	32.3839	30.5239	34.3153	33.6833	32.5831	34.4435	31.9808	40.0769	37.7905	37.1103	31.8065	32.5646	31.27	38.6309	41.0447	39.3924	aqp-10	-0.116396	-0.0600803	-0.651837	-0.551176	-0.542605	-0.325251	-0.590354	-0.276272	0.0426493	0.0735541	0.276676	0.524958	1.18592e-11	3.50269e-10	3.21531e-06	3.74264e-05
WBGene00000179	aqp-11	41.2435	45.31	44.5651	30.3545	30.4382	28.455	44.9189	38.2387	38.5506	30.205	28.6583	27.7934	22.904	22.4937	22.5844	24.4947	25.9372	26.2542	34.4874	35.4164	35.3202	25.9187	24.3609	25.3621	32.3665	31.8973	32.2708	aqp-11	-0.551617	-0.107035	-0.596886	-0.944641	-0.768465	-0.315388	-0.791569	-0.438948	1.49656e-11	1.65441e-10	0.0331329	0.145378	3.88936e-12	1.23036e-10	6.30793e-07	9.90505e-06
WBGene00000212	asm-2	19.0099	20.2679	19.7915	5.61999	5.22532	4.97771	22.9213	24.3521	24.675	13.3894	12.6981	12.7278	3.2457	3.2549	3.15256	18.7202	18.9597	16.8211	21.2913	20.6328	19.0913	5.35478	5.07101	5.91854	24.3352	24.1782	24.5296	asm-2	-1.89968	0.284927	-0.606268	-2.61654	-0.120546	0.0487389	-1.86573	0.30849	3.03293e-20	1.43915e-18	3.83434e-06	0.000842924	3.53557e-11	9.31208e-10	0.353662	0.498139
WBGene00000213	asm-3	88.3869	92.8624	92.7313	4.67463	4.21114	4.15059	124.761	109.754	110.89	4.02125	4.07501	4.26875	2.43714	2.00622	1.82806	13.1854	10.8197	12.6595	34.5437	28.7463	31.9808	5.90222	5.47748	5.41867	79.1973	71.1007	74.5582	asm-3	-4.37901	0.333304	-4.45619	-5.43794	-2.90458	-1.51997	-4.01584	-0.285473	6.70894e-24	6.31278e-22	1.6918e-07	7.94096e-05	1.98613e-23	5.8463e-21	6.69168e-21	2.0037e-18
WBGene00000217	asp-4	432.304	446.713	437.731	434.424	437.731	429.678	436.453	457.945	474.346	265.627	268.396	251.374	249.458	250.749	264.67	351.99	344.919	341.501	305.575	316.381	300.706	393.784	395.227	442.855	365.052	357.878	395.524	asp-4	-0.0160601	0.0548165	-0.746926	-0.784777	-0.343132	-0.513723	-0.100266	-0.23688	0.679226	0.744987	0.161779	0.384933	2.62101e-17	2.19899e-15	2.03729e-13	1.7479e-11
WBGene00000221	atf-5	44.4187	42.2096	46.0626	24.8676	26.0945	26.3396	47.0326	40.988	41.6972	28.8153	29.8305	27.3519	23.9739	25.9372	23.3961	32.964	32.6197	33.2875	31.0469	29.6384	32.0235	24.0384	24.7014	26.8704	39.3247	39.3993	36.9322	atf-5	-0.782034	-0.0343373	-0.628634	-0.856016	-0.424398	-0.517183	-0.817302	-0.198471	1.55585e-14	2.79136e-13	0.48662	0.710358	2.3982e-12	7.88816e-11	1.07345e-10	4.88026e-09
WBGene00000239	bas-1	29.2996	34.0543	32.0103	25.4644	27.295	25.1543	32.3623	30.3294	31.8457	21.2566	22.5617	22.2432	23.1332	22.4937	22.4422	15.4391	14.4231	15.9134	31.4903	30.2787	30.0797	23.3547	24.2937	25.4353	26.9781	28.4127	26.3606	bas-1	-0.288011	-0.00775783	-0.524495	-0.481052	-1.0549	-0.0475821	-0.382244	-0.216783	4.18096e-06	1.83825e-05	0.874078	0.942806	1.28764e-10	3.05082e-09	0.341568	0.485435
WBGene00000283	cah-5	39.9268	39.7787	37.966	11.439	11.1323	11.6621	39.9232	37.1159	37.4931	17.6848	20.9228	20.0574	8.046	9.1702	9.30044	18.6782	19.6819	19.511	28.5032	30.2787	26.7694	10.6993	11.0472	10.8871	35.645	34.7762	35.0473	cah-5	-1.78034	-0.0388155	-1.00579	-2.15285	-1.02133	-0.462369	-1.84916	-0.157707	5.16693e-22	3.37346e-20	0.405157	0.646904	2.96591e-17	2.41826e-15	3.06042e-10	1.27765e-08
WBGene00000298	cat-4	36.7597	39.633	39.7927	31.9808	32.1731	31.6246	39.3993	46.461	47.5388	16.2282	18.3018	17.403	16.5849	15.9557	15.1815	13.1388	13.6547	12.9299	35.1086	35.7814	36.2246	33.5254	33.1443	31.7062	43.0104	40.0824	43.8696	cat-4	-0.276415	0.194582	-1.16141	-1.28156	-1.5475	-0.115813	-0.236443	0.128688	2.61677e-05	9.84094e-05	0.000824516	0.0160172	7.75185e-17	5.85332e-15	0.0411072	0.0971833
WBGene00000371	cco-1	256.406	265.947	269.783	206.592	206.592	210.716	277.706	163.611	171.441	148.179	145.914	147.721	92.8624	112.107	103.51	156.759	157.965	156.502	193.802	182.97	178.655	143.374	145.687	131.486	186.994	192.747	186.34	cco-1	-0.343713	-0.409944	-0.840986	-1.36303	-0.748129	-0.510913	-0.911402	-0.483809	0.00157454	0.00401365	0.000262519	0.00947407	5.73013e-09	9.55039e-08	1.8603e-05	0.000159702
WBGene00000388	cdc-25.3	30.3107	30.7355	29.5974	26.2755	23.9692	22.7855	27.3756	25.5377	24.0714	20.2983	20.8622	20.9337	20.953	22.4312	22.1717	21.8294	22.9806	22.0377	21.0229	19.4116	18.7822	22.6822	21.7862	23.0809	22.5238	22.5736	22.4895	cdc-25.3	-0.308824	-0.234384	-0.543546	-0.466893	-0.437338	-0.610922	-0.424469	-0.422218	1.22102e-06	5.98178e-06	5.37384e-05	0.00462868	4.96913e-11	1.2823e-09	3.32134e-12	2.16849e-10
WBGene00000391	cdd-1	6.23139	5.95862	6.44058	6.67441	7.15645	7.05273	6.82962	5.12302	5.11617	3.12004	3.77174	3.91312	2.97331	2.8116	2.99919	6.45228	6.46472	5.92956	4.44593	5.8129	3.64684	4.17873	4.58555	3.48944	6.84054	7.93618	7.55893	cdd-1	0.16084	-0.135588	-0.786799	-1.08518	0.01139	-0.455555	-0.600069	0.25859	0.151741	0.218569	0.241606	0.484692	3.01999e-06	2.33103e-05	0.000856776	0.00397426
WBGene00000412	cdr-1	2.48579	2.92065	3.27637	4.23247	3.56435	4.18344	3.68419	3.13819	3.13819	1.43259	1.32375	1.74784	1.96439	2.02485	1.51896	1.86386	1.87563	1.35728	2.39763	2.33053	2.36354	3.27372	3.42044	3.62781	3.86738	3.80135	3.55572	cdr-1	0.477965	0.210477	-0.933135	-0.645555	-0.786549	-0.27682	0.257882	0.383978	0.000289597	0.000871954	0.0867224	0.26388	3.17188e-06	2.43528e-05	0.0440403	0.102444
WBGene00000458	ceh-37	6.03366	6.34361	6.16759	4.58203	4.29412	4.36235	6.95536	5.18423	5.38544	3.71284	3.77174	4.03602	4.09664	4.87245	3.66147	4.32671	4.09664	4.86741	5.38813	5.0448	4.70513	3.71159	3.77999	3.71384	5.7731	5.45878	5.54717	ceh-37	-0.479134	-0.0881505	-0.67805	-0.552547	-0.47425	-0.28752	-0.718118	-0.142419	4.84394e-05	0.000171264	0.344083	0.589159	7.58477e-07	7.01036e-06	0.00580649	0.0194412
WBGene00000515	ckc-1	26.6801	26.0189	25.0333	10.3163	10.7794	9.9566	26.298	25.8993	28.6355	18.2731	17.7229	17.1057	11.4728	10.1165	10.3616	16.7359	15.801	16.9373	21.797	22.1565	22.2527	12.9981	12.6785	13.0276	20.5229	21.9672	21.2662	ckc-1	-1.32608	0.0528035	-0.55241	-1.28581	-0.653313	-0.232517	-1.00819	-0.286494	1.29607e-19	5.53041e-18	0.252973	0.49794	1.20886e-11	3.56439e-10	3.54859e-05	0.000273904
WBGene00000525	clc-4	0.580219	0.67057	0.479036	0.210348	0.174276	0.178866	0.815982	0.636929	0.525336	0.377175	0.112896	0.28854	0.14382	0.140385	0.163406	0.427577	0.224709	0.270359	0.170646	0.0957236	0.224709	0.0169575	0.0899412	0.221458	0.324738	0.209236	0.211465	clc-4	-1.61009	0.200529	-1.30356	-1.95338	-0.978392	-1.88353	-3.12253	-1.2363	0.00163857	0.00416161	0.499054	0.719174	0.00563803	0.0159628	0.00081807	0.00383466
WBGene00000539	cln-3.1	5.77598	6.46325	6.10235	5.61999	6.07518	5.94721	7.05757	8.29188	8.14692	3.68836	3.80555	3.49318	4.60396	4.34588	4.48588	6.70522	6.15075	5.28979	5.27466	5.12014	5.75767	6.74728	7.28506	7.39057	5.81112	6.38756	7.35331	cln-3.1	-0.056556	0.357907	-0.7456	-0.448995	-0.0307362	-0.182694	0.224126	0.0889964	0.538363	0.621948	0.000237282	0.00909686	1.46544e-07	1.68211e-06	0.0596531	0.129791
WBGene00000558	cnc-4	1.9608	1.40723	1.53179	43.6501	48.6053	46.743	1.80196	1.04747	1.04747	1.15628	1.00081	0.753274	10.1171	10.2029	9.16801	1.04526	1.36952	1.18797	1.10134	1.29495	1.24336	5.8333	5.81792	5.05077	1.5475	1.69779	1.32506	cnc-4	4.81282	-0.362897	-0.776707	2.58422	-0.433961	-0.431918	1.77054	-0.100177	1.48375e-21	8.9785e-20	0.0761582	0.244843	0.00208346	0.00674813	0.0425779	0.0998584
WBGene00000593	col-2	43.3409	41.4506	38.6266	17.4327	17.6925	16.6916	32.957	25.3061	28.1278	28.0338	29.36	26.716	15.5558	14.9329	15.4138	26.4503	23.7034	25.5094	28.2775	27.5956	29.3888	18.4825	17.599	15.5992	27.3374	28.9137	25.346	col-2	-1.24989	-0.521084	-0.554692	-1.42542	-0.708213	-0.532329	-1.25098	-0.596751	4.65345e-16	1.08624e-14	1.05385e-08	9.40573e-06	5.30464e-09	8.90964e-08	8.95996e-09	2.58915e-07
WBGene00000617	col-40	113.851	108.956	124.316	80.0521	85.5815	91.9774	124.903	70.5937	73.2873	63.892	69.469	72.5	48.6564	44.4495	45.8573	63.5366	57.125	63.8341	73.7849	75.6411	80.7598	51.7251	53.4756	36.6446	71.1007	71.1832	53.7566	col-40	-0.432295	-0.414142	-0.750703	-1.31739	-0.910781	-0.591648	-1.2934	-0.831744	0.00245056	0.005969	0.00332069	0.0348673	6.12314e-06	4.30006e-05	0.000113064	0.000721107
WBGene00000620	col-43	80.7513	81.7813	83.3832	38.668	40.1657	43.1154	89.3251	69.1924	66.9294	51.0075	55.4732	52.2254	38.5939	36.9958	36.7597	51.5562	48.0337	52.329	64.7875	63.7008	69.7437	42.7673	42.7851	31.7638	65.8276	65.3355	53.944	col-43	-1.01339	-0.134413	-0.631426	-1.1278	-0.694372	-0.311172	-1.0675	-0.41378	6.58589e-12	7.73377e-11	0.109127	0.303952	6.1728e-08	7.95275e-07	0.000823594	0.00385224
WBGene00000642	col-66	19.4759	19.9972	20.4213	9.28952	10.2248	10.2075	22.554	8.95774	10.0014	8.69282	8.74719	9.74957	6.55318	6.38972	5.78157	8.48886	8.05822	8.66748	10.0092	13.6641	11.1127	6.83326	7.96828	5.95424	10.5046	10.457	9.1613	col-66	-1.01271	-0.646643	-1.13361	-1.67125	-1.2442	-0.803525	-1.52192	-0.990043	5.72093e-06	2.44779e-05	0.000565497	0.0135275	2.25907e-06	1.81888e-05	7.61392e-05	0.00051896
WBGene00000652	col-76	15.2406	15.3638	15.406	12.5135	13.127	13.149	16.498	16.3626	16.1883	7.00087	7.03649	6.45641	10.2995	10.8197	9.91455	6.58185	6.01579	6.46006	10.9541	11.3243	11.0778	12.0539	13.7504	12.2722	11.5288	11.4759	11.0595	col-76	-0.248545	0.0928084	-1.17117	-0.567368	-1.27507	-0.465324	-0.273062	-0.433613	4.43832e-05	0.000158634	0.0669173	0.225529	3.75038e-17	3.02943e-15	1.90292e-09	6.49274e-08
WBGene00000663	col-88	94.1833	90.7817	95.5204	35.3735	36.6851	45.1242	92.811	49.8754	52.3853	52.5661	50.4332	55.1779	19.6142	24.3309	24.4408	42.5338	42.1654	44.4068	57.1336	57.9481	59.2315	31.5955	33.1079	26.97	48.3262	46.7851	39.043	col-88	-1.27025	-0.578855	-0.824711	-2.04163	-1.11692	-0.685994	-1.60845	-1.06783	4.32386e-10	3.8215e-09	6.61744e-05	0.00497511	6.75992e-07	6.34935e-06	8.29992e-06	8.26992e-05
WBGene00000667	col-92	40.8596	43.133	40.9969	32.8474	35.668	34.8175	45.2442	35.1086	35.9609	27.6959	28.146	28.2313	17.2075	16.999	16.4501	19.9787	22.8836	19.7879	40.0214	39.0678	39.9303	17.9654	18.0208	17.9619	25.5028	27.0033	26.402	col-92	-0.276045	-0.109676	-0.570167	-1.30053	-0.996855	-0.0686212	-1.21009	-0.662156	9.37445e-05	0.000312248	0.0739417	0.240027	1.15198e-09	2.21802e-08	0.257034	0.396229
WBGene00000670	col-95	127.673	117.276	133.862	42.2314	40.6818	48.7664	153.525	112.661	109.387	72.6318	71.1714	80.7936	41.4946	41.7608	40.3477	87.4769	84.4611	85.7846	103.7	116.974	114.594	72.3709	87.297	61.578	88.8367	95.1675	79.0848	col-95	-1.52703	-0.0261563	-0.751907	-1.61173	-0.5545	-0.178775	-0.780076	-0.527447	3.23141e-14	5.50735e-13	0.780008	0.895333	3.09219e-08	4.32036e-07	0.0678593	0.143739
WBGene00000671	col-96	138.674	144.042	163.29	82.2997	87.3447	94.2668	165.117	81.7813	81.3459	67.4685	69.407	72.3918	41.5248	38.0153	37.3874	60.8775	61.2812	67.129	84.9811	84.3628	87.7373	54.641	54.9597	41.8917	76.9675	74.0442	61.2192	col-96	-0.755942	-0.516944	-1.08488	-1.92387	-1.22876	-0.789521	-1.55177	-1.07162	1.56718e-05	6.14002e-05	0.00106551	0.0184863	8.7546e-08	1.07602e-06	8.92312e-06	8.72567e-05
WBGene00000677	col-103	523.792	513.599	547.912	547.912	553.046	577.487	561.556	388.325	386.227	344.919	376.233	351.374	375.284	349.268	358.813	335.096	329.569	347.734	419.113	417.081	435.081	413.706	427.025	332.775	392.199	404.01	357.878	col-103	0.0818354	-0.266912	-0.56421	-0.5492	-0.645947	-0.318174	-0.43728	-0.458829	0.336394	0.424194	0.00394742	0.0388954	5.22533e-07	5.03598e-06	0.000890824	0.00410915
WBGene00000708	col-135	47.2392	41.3697	41.4078	1.33338	1.67381	1.53086	40.8018	56.9631	57.3488	23.573	27.3429	23.6228	5.90764	6.27343	6.70522	35.0251	31.9808	34.4516	19.6445	19.7281	21.4101	5.39462	5.90222	5.5018	27.1445	23.6177	28.1924	col-135	-4.87778	0.234462	-0.809406	-2.79462	-0.360651	-1.10072	-2.96117	-0.72586	7.59853e-15	1.42509e-13	0.00798412	0.0600261	3.33241e-09	5.85177e-08	1.01189e-11	5.79985e-10
WBGene00000710	col-137	276.972	284.604	301.423	131.784	134.782	146.263	297.714	233.967	229.456	175.207	186.179	198.81	91.184	86.6945	87.297	160.715	158.215	166.235	233.238	243.135	246.89	120.456	135.911	106.337	212.476	209.137	179.605	col-137	-1.06454	-0.188589	-0.62242	-1.70033	-0.828906	-0.254569	-1.2511	-0.523473	3.6747e-14	6.20199e-13	0.0137871	0.0845186	4.11532e-09	7.07632e-08	0.00150139	0.00633802
WBGene00000714	col-141	29.5336	30.7719	33.5118	17.4662	14.5558	16.8437	32.6314	19.912	21.2001	18.9868	19.0132	20.9337	12.3652	10.9766	11.7631	15.1706	13.583	15.282	24.658	27.1103	27.4981	13.8209	16.1056	11.5702	20.9049	18.1996	14.816	col-141	-0.934998	-0.374646	-0.663844	-1.41242	-1.08693	-0.244145	-1.16954	-0.806084	6.54739e-08	4.04945e-07	0.00304866	0.0331327	1.08224e-05	6.99226e-05	0.041888	0.0986264
WBGene00000715	col-142	306.881	314.008	333.815	165.405	164.7	171.632	348.649	244.679	237.277	211.114	206.408	224.528	116.939	107.744	108.317	168.513	166.235	166.963	268.059	297.01	287.544	154.915	179.605	131.873	209.298	220.08	188.623	col-142	-0.926841	-0.219892	-0.570714	-1.51809	-0.926604	-0.164672	-1.03773	-0.628256	1.00177e-10	9.70857e-10	0.0192946	0.104945	9.28788e-07	8.38807e-06	0.0738502	0.153563
WBGene00000716	col-143	724.89	746.16	775.575	384.656	375.284	406.618	798.325	686.633	639.747	488.311	504.458	505.822	363.617	339.385	340.731	505.822	501.973	500.319	599.948	636.709	622.893	441.594	464.774	389.435	609.641	593.437	522.272	col-143	-0.945406	-0.0842332	-0.583002	-1.10533	-0.574175	-0.273113	-0.79373	-0.382686	1.9621e-15	4.08582e-14	0.151712	0.37073	1.32309e-10	3.12204e-09	6.04609e-05	0.000428756
WBGene00000722	col-149	34.0012	35.6115	36.8184	153.525	161.962	155.968	36.4313	27.8336	28.4209	23.7148	23.6324	21.9016	112.717	109.785	104.884	15.2171	16.4632	16.4939	39.2004	40.2523	41.1258	84.5887	91.0561	80.0057	23.1332	26.0945	21.6286	col-149	2.14635	-0.205844	-0.620354	1.6214	-1.13706	0.180472	1.26567	-0.587442	2.57166e-24	2.64218e-22	0.00819729	0.0609475	1.34107e-08	2.05563e-07	0.0152846	0.0431202
WBGene00000731	col-158	1.38094	1.29609	1.22806	8.99285	9.56228	9.53297	1.4949	1.53356	1.458	1.08663	0.470739	0.698364	5.08245	6.70116	5.84932	0.776628	0.75067	1.04633	1.39319	2.36751	1.74662	6.96009	7.64307	6.06464	1.25337	2.2947	1.81644	col-158	2.83977	0.20059	-0.874694	2.1639	-0.601065	0.437759	2.40383	0.416277	2.48312e-13	3.60271e-12	0.391291	0.634031	0.00884771	0.0233417	0.0613669	0.132772
WBGene00000732	col-159	456.834	453.846	501.973	237.036	243.423	272.54	496.05	313.526	309.143	292.648	310.96	304.807	144.779	133.215	135.911	252.705	259.42	256.517	336.705	351.374	357.551	160.855	175.815	124.214	285.886	296.811	228.104	col-159	-0.909514	-0.368257	-0.635179	-1.76891	-0.875467	-0.43332	-1.62152	-0.807396	1.12725e-08	7.88759e-08	0.00233988	0.0282199	5.00777e-06	3.63283e-05	0.000540331	0.00268881
WBGene00000781	cpr-1	716.909	691.462	686.633	4273.71	4273.71	4273.71	795.68	807.108	815.066	82.9979	95.5647	89.9852	1691.14	1588.38	1691.14	123.287	122.594	118.917	259.42	243.553	254.057	2484.5	2484.5	2345.38	400.983	346.673	383.521	cpr-1	2.61326	0.206426	-2.96564	1.24531	-2.52252	-1.4681	1.80402	-0.892163	5.3927e-34	1.8731e-30	7.53003e-06	0.00139121	2.57119e-31	8.93079e-28	9.87967e-25	9.53223e-22
WBGene00000784	cpr-4	276.615	268.396	281.106	677.914	711.133	686.633	275.758	211.787	209.887	60.4654	69.706	65.8617	314.587	306.564	313.526	140.789	146.707	142.088	98.4173	105.178	103.445	381.302	386.717	369.793	116.057	113.791	115.012	cpr-4	1.32819	-0.254475	-2.07694	0.177814	-0.943113	-1.42948	0.462252	-1.26026	1.0511e-20	5.38482e-19	0.000133878	0.00677859	5.546e-23	1.3959e-20	1.27663e-19	3.16732e-17
WBGene00000786	cpr-6	698.077	724.89	698.077	289.617	306.723	291.066	708.318	778.187	780.997	202.906	222.14	203.524	138.033	146.459	141.021	263.413	254.057	263.705	404.01	404.01	394.361	287.215	284.862	284.604	529.828	515.103	533.041	cpr-6	-1.25774	0.0949053	-1.7562	-2.31758	-1.44111	-0.818466	-1.30758	-0.426461	3.37182e-25	4.43624e-23	0.005871	0.0493761	1.17357e-28	1.45581e-25	1.87539e-20	5.25321e-18
WBGene00000788	cpz-1	412.771	427.857	429.678	215.833	238.044	227.94	462.106	451.195	451.195	103.359	113.953	105.59	122.665	123.797	124.033	147.666	144.207	153.889	259.063	258.766	264.67	206.015	207.059	188.884	355.766	349.974	338.626	cpz-1	-0.89949	0.103832	-1.97697	-1.77704	-1.51006	-0.698519	-1.07628	-0.282123	4.49471e-21	2.44701e-19	0.0038377	0.0382297	2.62673e-29	4.56184e-26	2.79571e-18	5.6457e-16
WBGene00000799	crn-6	11.398	12.675	12.8118	5.47858	5.35038	5.09061	12.1198	14.3345	14.5516	5.78797	5.53385	5.61999	5.96039	6.22506	6.18526	8.70477	8.69648	8.86771	9.35794	9.55047	10.1238	5.42136	6.28435	6.90261	11.9147	10.8197	11.5702	crn-6	-1.21041	0.149927	-1.1227	-1.00477	-0.48619	-0.344273	-1.00196	-0.102148	4.07769e-14	6.78977e-13	0.0304076	0.138079	2.54547e-13	1.00016e-11	4.67897e-05	0.000344175
WBGene00000821	csp-3	0.196961	0.204483	0.280548	0.129589	0.204483	0.12278	0.248825	0.273059	0.0899412	0.140385	0.112896	0.0661117	0.14382	0.115381	0.163406	0.169382	0.165854	0.210348	0.170646	0.133009	0.155218	0.273059	0.269248	0.140385	0.154068	0.174816	0.211465	csp-3	-0.597132	-0.260958	-1.14514	-0.683565	-0.296788	-0.54327	-0.00780616	-0.326521	0.152641	0.219647	0.497006	0.718154	0.0203455	0.0477552	0.189612	0.315511
WBGene00000831	ctl-2	45.1614	49.1349	50.863	72.8242	74.4758	74.4453	53.6779	47.1708	47.5901	21.9587	23.4201	22.9892	29.7328	31.4021	30.0087	25.3816	24.7716	23.6866	33.3925	34.5949	32.964	42.4558	45.6411	41.643	40.5221	38.1096	36.7029	ctl-2	0.613884	0.0339882	-1.08339	-0.668186	-0.975477	-0.521997	-0.157894	-0.329629	1.11846e-13	1.71745e-12	0.485325	0.709863	1.78929e-17	1.56154e-15	7.19167e-11	3.38476e-09
WBGene00000929	dao-3	36.2099	37.9222	37.966	27.4741	27.6041	30.5507	36.027	36.4255	36.5876	26.737	25.3698	26.8037	29.0017	26.7329	28.8549	31.2776	30.3419	31.3263	27.7899	30.4803	28.7653	26.2883	29.9301	27.3519	37.4991	35.3265	35.2781	dao-3	-0.391607	-0.0390478	-0.505703	-0.407498	-0.269868	-0.36805	-0.424102	-0.0517655	8.51379e-09	6.09477e-08	0.404589	0.64636	7.42929e-11	1.84584e-09	2.78056e-08	7.04963e-07
WBGene00000966	dhs-2	11.8966	13.4937	11.5584	5.58947	5.86966	6.28435	13.2833	14.2648	11.9583	6.62495	6.5222	6.45641	4.41827	3.55572	4.63992	4.01807	5.00708	4.11932	12.3317	10.9113	13.0276	4.74808	4.54578	4.66523	11.1471	10.7676	11.6621	dhs-2	-1.05786	0.1029	-0.909237	-1.55988	-1.48891	-0.0209915	-1.39946	-0.133182	6.55048e-12	7.70732e-11	0.178333	0.407943	1.44582e-10	3.38404e-09	0.786067	0.863457
WBGene00000967	dhs-3	72.6318	70.1088	72.2163	34.8175	32.3581	32.7749	66.7468	67.9837	70.9932	23.6609	24.2245	22.7387	22.904	22.7758	22.8399	40.4458	39.2504	39.3339	42.1152	42.2002	43.3994	30.0315	29.6626	29.6255	50.7066	51.4728	50.9184	dhs-3	-1.10381	-0.0650633	-1.60823	-1.65	-0.854415	-0.751896	-1.26726	-0.489943	2.23438e-23	1.88371e-21	0.0452056	0.175634	1.63514e-26	1.09221e-23	1.81088e-19	4.42952e-17
WBGene00000968	dhs-4	3.96985	4.26394	3.36469	3.1689	3.81059	2.79231	4.11461	3.75545	3.97304	2.17851	1.6095	2.06303	3.4441	3.21424	4.0269	2.26852	2.18583	2.02485	2.15096	1.83858	2.4346	3.13111	3.01479	3.27637	2.20087	2.82008	2.14845	dhs-4	-0.251825	0.0379187	-0.989983	-0.121826	-0.841415	-0.850575	-0.296723	-0.69474	0.0476719	0.0807568	0.742067	0.873727	4.38549e-07	4.35465e-06	1.8546e-06	2.38588e-05
WBGene00000971	dhs-7	7.11471	7.23015	6.30804	4.43263	4.61939	3.92401	6.26952	7.98707	7.26174	1.75873	1.95853	2.37327	2.70419	2.47857	2.99919	0.893399	0.943338	1.01361	4.60053	4.87939	4.30087	3.94154	3.91765	4.17009	3.62713	2.85797	4.00899	dhs-7	-0.668902	0.0542979	-1.76073	-1.34221	-2.84961	-0.584042	-0.780722	-0.991626	7.89819e-07	4.02488e-06	0.556223	0.758475	3.82623e-12	1.21259e-10	5.23808e-06	5.64329e-05
WBGene00000983	dhs-20	14.3783	16.0583	14.1182	7.85773	9.1691	8.30808	16.0256	15.6345	16.5237	8.69282	8.42958	7.9694	3.53991	3.57672	3.62511	7.26174	7.87408	7.0166	12.1694	11.1512	11.0077	4.8151	4.79015	5.17491	10.1176	11.0029	10.0434	dhs-20	-0.818784	0.116601	-0.82893	-2.05372	-1.00802	-0.370175	-1.59687	-0.512151	9.59717e-13	1.28607e-11	0.0491267	0.185555	1.24543e-12	4.30866e-11	1.7767e-06	2.29925e-05
WBGene00000989	dhs-26	39.0348	41.2435	41.9471	0.376178	0.234285	0.178866	49.6609	50.4105	50.1137	2.24082	1.69779	2.49654	0.14382	0.174276	0.100299	7.79761	6.58294	6.78882	8.8369	8.13962	8.55367	0.486198	0.557617	0.547709	27.0918	24.6124	28.5371	dhs-26	-7.30043	0.298708	-4.2505	-8.19455	-2.53811	-2.25406	-6.25514	-0.609048	1.82914e-15	3.83986e-14	5.3894e-07	0.000199144	9.91541e-22	1.95683e-19	9.66194e-23	5.78617e-20
WBGene00001103	dsl-1	1.32637	1.29609	1.49699	0.541228	0.567005	0.366258	1.32981	1.32981	1.56565	0.918312	0.735531	1.05985	0.834263	0.754237	0.513777	1.64961	0.721714	1.44595	0.902609	0.98921	1.0519	0.559924	0.623883	0.75067	1.00788	1.52847	1.07803	dsl-1	-1.50124	0.028625	-0.607876	-0.987807	-0.21237	-0.492122	-1.11576	-0.20783	6.09514e-05	0.000210945	0.88809	0.949954	0.0188759	0.0447706	0.0412589	0.0974888
WBGene00001150	ech-1.1	6.76118	7.29044	6.27881	3.94958	4.94326	4.79243	7.67587	6.4588	5.6139	2.2097	2.77598	2.7733	2.52916	2.21496	2.83414	3.28161	2.15842	2.17305	4.68284	4.97771	4.0811	3.47445	3.71092	4.2881	4.05947	3.60163	3.79978	ech-1.1	-0.588493	-0.0431408	-1.40437	-1.44661	-1.4828	-0.571869	-0.846141	-0.831442	3.5991e-05	0.000131149	0.69047	0.845098	8.54297e-10	1.69367e-08	5.34369e-05	0.000386522
WBGene00001155	ech-6	313.526	305.226	317.807	135.911	131.873	129.779	298.985	283.556	290.225	200.926	208.564	200.926	142.587	141.76	143.064	145.914	139.703	142.483	251.103	266.848	259.711	160.389	154.278	151.549	247.005	243.683	248.059	ech-6	-1.23586	-0.102143	-0.61813	-1.13194	-1.13043	-0.269642	-1.00615	-0.342487	8.92349e-27	2.01265e-24	0.000934823	0.017288	4.99817e-19	5.82572e-17	2.05925e-10	8.83038e-09
WBGene00001165	efn-4	10.8457	10.3511	10.201	2.75622	2.68119	2.81284	9.48384	9.28952	9.66722	6.46006	7.00205	7.30415	4.18243	4.47716	3.71384	7.21788	7.66929	7.77108	5.58637	5.8129	6.03366	3.56913	4.25077	3.62781	7.59652	7.08424	6.51983	efn-4	-1.92105	-0.143791	-0.593699	-1.339	-0.466324	-0.849193	-1.4498	-0.567535	1.47034e-17	4.47204e-16	0.0299734	0.136951	3.64798e-09	6.34178e-08	3.45909e-12	2.24157e-10
WBGene00001234	eif-6	128.785	131.008	134.747	116.822	114.021	121.828	133.998	96.3973	98.5673	85.1467	85.2869	94.9871	87.4223	84.5607	80.3407	90.6766	89.7885	94.2835	95.5863	97.1214	94.4343	89.0356	92.5853	82.3512	103.33	101.294	93.0864	eif-6	-0.16191	-0.276318	-0.570831	-0.6439	-0.520557	-0.457753	-0.577428	-0.406552	0.0292656	0.0531759	0.000535798	0.0131615	1.68092e-08	2.51137e-07	7.01468e-07	1.07523e-05
WBGene00001244	elo-6	361.996	371.232	363.617	230.83	215.542	220.371	332.496	310.96	311.992	230.357	242.297	218.37	185.079	191.443	187.142	138.225	134.574	136.295	252.972	252.467	249.769	194.372	185.452	206.5	188.972	206.969	202.28	elo-6	-0.717589	-0.199133	-0.668634	-0.960284	-1.42326	-0.53813	-0.906575	-0.87539	9.72646e-18	3.08811e-16	6.49753e-06	0.0012823	6.60527e-17	5.03796e-15	1.19478e-14	1.35511e-12
WBGene00001248	elp-1	11.2741	10.5976	9.94383	8.11376	6.93721	6.38265	9.20901	10.5063	10.126	7.55049	7.66331	6.72762	5.96039	7.08797	7.01718	6.19184	5.78409	6.26396	10.062	9.20173	9.67469	7.35905	7.68954	7.52564	8.04904	8.7422	8.37965	elp-1	-0.566717	-0.0948581	-0.540654	-0.66873	-0.801484	-0.133676	-0.493139	-0.33739	1.4806e-07	8.63742e-07	0.210479	0.447856	4.13038e-07	4.14398e-06	0.0871046	0.174219
WBGene00001303	emo-1	306.04	295.743	311.451	223.254	228.513	219.546	314.865	243.683	239.577	170.381	182.678	167.772	154.114	157.199	157.922	201.992	198.669	196.472	222.647	216.927	223.711	192.747	192.747	172.453	248.538	252.127	247.38	emo-1	-0.44407	-0.204153	-0.811486	-0.960546	-0.613361	-0.460999	-0.710233	-0.287767	2.61636e-08	1.72507e-07	0.00133211	0.0207936	8.09372e-14	3.40348e-12	1.31076e-08	3.62056e-07
WBGene00001377	eya-1	4.47514	4.67636	4.24684	2.17026	2.95181	2.74534	4.73237	3.84531	4.34978	2.71716	3.11199	3.38491	3.59914	3.48216	3.27372	4.3798	3.10376	4.71441	2.92065	3.62511	3.19142	3.87929	3.60338	3.1466	4.90082	4.24963	3.38554	eya-1	-0.792163	-0.0549431	-0.538691	-0.36886	-0.156904	-0.473211	-0.328597	-0.107788	2.06393e-05	7.89346e-05	0.676629	0.83777	0.00118196	0.00411531	0.00267312	0.0101829
WBGene00001397	fat-5	70.1331	62.4203	69.9228	366.668	379.269	384.656	51.3922	39.0825	41.478	7.34873	8.64096	9.68046	121.471	114.4	114.742	6.58185	5.71647	6.39698	23.0927	27.6485	24.9694	252.127	272.156	229.782	27.1908	22.4367	23.2618	fat-5	2.47987	-0.625486	-2.97873	0.791788	-3.4382	-1.42705	1.8959	-1.47798	2.43704e-25	3.41323e-23	1.35717e-08	1.12238e-05	7.79474e-19	8.79034e-17	2.23474e-15	2.79214e-13
WBGene00001399	fat-7	118.601	125.034	120.53	22.7155	19.2523	21.5991	107.974	104.351	110.714	4.59927	6.0325	5.52212	2.15842	2.13118	2.1403	4.49307	3.55843	3.71284	39.3129	47.7785	42.036	13.7893	15.0075	15.0342	33.9577	31.6018	31.9097	fat-7	-2.52045	-0.173077	-4.51136	-5.84031	-4.98307	-1.50606	-3.06201	-1.90352	5.80684e-26	9.79101e-24	0.000719223	0.0151278	1.56324e-25	7.33751e-23	2.86058e-22	1.37999e-19
WBGene00001451	flp-8	6.58859	6.60359	5.47497	5.53338	6.07518	5.32961	5.85934	5.12302	5.48992	3.65626	4.10732	3.59593	5.21029	3.85134	4.73237	3.18438	3.58833	3.86738	4.72385	3.33144	3.84904	5.80195	4.81452	4.40374	4.54641	4.73184	4.28108	flp-8	-0.136315	-0.175484	-0.709913	-0.44207	-0.792639	-0.638727	-0.304455	-0.452917	0.219862	0.298377	0.116014	0.315752	4.7332e-06	3.46842e-05	1.37996e-05	0.000124757
WBGene00001465	flr-1	6.45529	7.23015	5.73509	6.92987	6.62827	6.64483	5.40131	7.15122	7.60544	4.96778	4.36496	3.96985	7.03871	7.38594	7.13653	5.3207	4.07273	4.81452	6.15075	5.59615	5.67919	7.20899	6.54997	7.84073	6.52334	6.06637	6.24223	flr-1	0.0676551	0.0414845	-0.552915	0.160964	-0.461471	-0.145843	0.151026	-0.0361287	0.519901	0.60452	0.690592	0.845098	7.22252e-05	0.000363155	0.186883	0.312107
WBGene00001501	ftn-2	208.979	213.451	214.45	263.055	273.095	263.055	226.855	185.77	185.97	113.497	117.224	119.584	157.199	151.693	154.355	131.555	125.411	127.831	142.373	133.14	140.272	183.054	186.994	175.885	160.955	168.898	158.32	ftn-2	0.32729	-0.0943788	-0.861593	-0.459016	-0.727455	-0.614283	-0.22125	-0.383512	9.06393e-08	5.48096e-07	0.0537809	0.196552	1.58634e-16	1.1291e-14	4.05377e-13	3.15704e-11
WBGene00001578	ges-1	36.8776	37.0541	34.7814	18.3901	18.7513	19.4759	33.898	30.2176	27.5024	21.5699	22.5208	22.3718	14.2237	14.6179	14.621	5.92667	7.26109	5.61149	29.5211	31.712	28.9032	13.3736	13.3348	13.8002	15.2633	14.565	16.0196	ges-1	-0.942632	-0.24796	-0.709245	-1.32264	-2.5412	-0.272584	-1.4257	-1.2471	4.59826e-15	8.96274e-14	0.000108626	0.00610522	2.47569e-12	8.12764e-11	3.79538e-05	0.000289352
WBGene00001604	gln-3	172.942	175.376	185.288	109.231	118.641	118.435	183.984	134.437	128.558	72.7222	80.1956	78.4277	72.1238	73.5857	69.6951	75.1879	67.8584	76.8946	113.735	113.821	112.539	79.6149	90.0862	72.587	112.907	127.408	110.4	gln-3	-0.625035	-0.270954	-1.20457	-1.30656	-1.27903	-0.648507	-1.13818	-0.60657	2.32028e-08	1.5451e-07	0.00195071	0.0253801	4.2034e-14	1.84345e-12	1.19784e-08	3.33378e-07
WBGene00001687	gpn-1	1.14353	1.22091	1.25903	0.403607	0.567005	0.210348	1.15263	1.36565	1.34248	0.980287	0.735531	0.59979	0.728255	0.367495	0.513777	0.427577	0.66043	0.628795	1.25092	0.632269	1.16429	0.525336	0.341222	0.382116	0.866587	0.741324	0.662475	gpn-1	-1.69611	0.088054	-0.676877	-1.21235	-1.0604	-0.276274	-1.53027	-0.671329	5.48075e-05	0.000191363	0.675239	0.836916	0.0142334	0.0350974	0.238258	0.37457
WBGene00001693	grd-4	2.56394	2.92065	3.17755	0.698364	0.623883	0.833198	3.11776	2.78909	3.0522	1.82317	2.16449	1.77533	0.834263	0.853299	0.973362	3.2346	2.75677	3.13703	2.45767	2.17305	3.15256	1.60137	1.00664	1.11114	3.98182	3.69345	4.07501	grd-4	-2.01986	0.0552654	-0.59132	-1.70884	0.0778709	-0.161516	-1.24065	0.448193	1.31783e-09	1.06997e-08	0.651484	0.821903	0.000319285	0.00132434	0.216529	0.347964
WBGene00001702	grd-13	15.6455	17.5006	17.6104	6.70522	6.16627	7.55284	17.2869	12.3922	13.287	9.64002	10.6092	11.4081	5.17294	5.4979	4.84184	10.2803	9.28952	10.1487	12.0539	11.3243	11.9972	6.57899	6.3475	6.51018	13.0282	12.1351	11.7218	grd-13	-1.31275	-0.247786	-0.674894	-1.70199	-0.769562	-0.51406	-1.37835	-0.456453	3.28006e-13	4.68432e-12	0.00487787	0.0438932	3.6724e-08	5.02986e-07	1.8939e-06	2.4274e-05
WBGene00001711	grl-2	0.580219	0.519484	0.513777	0.236835	0.312325	0.27634	0.447775	0.273059	0.231815	0.240311	0.140385	0.227103	0.092211	0.174276	0.133009	0.204483	0.165854	0.210348	0.26335	0.365129	0.155218	0.167091	0.201717	0.346131	0.222487	0.174816	0.211465	grl-2	-0.991233	-0.810539	-1.44974	-2.07033	-1.49122	-1.1396	-1.28255	-1.42274	0.00345497	0.00813371	0.00991252	0.0683409	0.000420008	0.0016707	0.00152745	0.00643085
WBGene00001717	grl-8	1.07869	1.00337	0.920663	0.541228	0.481012	0.481012	0.842509	0.746402	0.709999	0.377175	0.565771	0.476665	0.234285	0.312969	0.252514	0.469577	0.539393	0.598681	0.386511	0.746979	0.847262	0.273059	0.341222	0.26335	0.402362	0.44407	0.807674	grl-8	-0.995986	-0.385107	-1.10097	-1.92	-0.895506	-0.714243	-1.7806	-0.94042	0.000698263	0.00193347	0.084495	0.259951	0.000462726	0.00181649	0.00556314	0.0187989
WBGene00001753	gst-5	30.6407	33.1631	32.6197	192.747	200.492	192.407	36.731	27.4938	28.6355	18.534	19.6032	20.02	61.8305	65.6634	63.892	30.2787	33.8082	31.1399	24.1404	24.7687	26.1095	83.4512	80.9191	83.3132	38.3828	39.7549	42.078	gst-5	2.60397	-0.0614565	-0.726028	0.990912	-0.0151839	-0.361569	1.36263	0.319057	2.59821e-27	7.91633e-25	0.371815	0.616359	3.01351e-10	6.62477e-09	2.18558e-05	0.000181438
WBGene00001758	gst-10	58.162	60.0527	60.3714	69.6668	66.2888	67.1709	69.2487	57.7851	57.8263	10.6668	11.99	10.8435	25.5094	25.8561	25.5955	11.7413	12.0526	11.6756	32.1131	31.1546	32.8358	55.8419	55.5392	56.1475	36.9409	36.5206	36.2748	gst-10	0.187168	0.046837	-2.41548	-1.21313	-2.33011	-0.892605	-0.0916643	-0.701636	0.00025986	0.000788984	0.308228	0.555942	5.20328e-24	1.7378e-21	1.08955e-16	1.70471e-14
WBGene00001760	gst-12	2.87636	2.48025	3.17755	3.76066	4.48277	4.67463	3.11776	2.78909	2.28615	1.72157	2.33558	1.72157	2.70419	2.02485	2.85849	2.05374	1.8208	1.60137	1.67735	2.17305	1.9506	3.37285	4.05378	3.23016	2.61968	2.52533	2.35137	gst-12	0.587977	-0.0601441	-0.586404	-0.19197	-0.664942	-0.578699	0.323785	-0.186137	0.000120424	0.000391574	0.677397	0.837967	0.00147529	0.00499246	0.00133424	0.00574105
WBGene00001764	gst-16	3.66831	3.74834	4.45767	6.95285	7.32221	7.41611	4.34588	2.97331	3.0522	2.53869	2.57795	2.27536	4.45824	4.6781	4.1931	3.28161	3.00031	3.54658	2.39763	3.0902	3.04727	5.58882	5.38131	5.5018	3.3307	3.41441	3.30517	gst-16	0.873473	-0.206422	-0.686291	0.174213	-0.268144	-0.492881	0.478042	-0.234752	2.34548e-09	1.83239e-08	0.0845414	0.260002	1.90859e-05	0.000114733	0.000461275	0.00234513
WBGene00001772	gst-24	18.3595	18.0848	17.0068	33.4656	36.019	33.4656	21.181	16.7359	17.605	9.73792	11.1711	9.09261	22.6444	20.8173	19.6934	12.122	11.4609	11.0472	14.5251	14.484	15.4482	22.4895	20.22	20.5077	14.9146	14.8295	15.5712	gst-24	0.944679	0.0496027	-0.843336	0.24062	-0.631924	-0.266732	0.242227	-0.238738	2.02162e-14	3.55719e-13	0.492502	0.71456	1.21647e-10	2.89007e-09	0.00141492	0.00603018
WBGene00001773	gst-25	0.112896	0.34017	0.312325	0.179976	0.234285	0.240311	0.178866	0.0866407	0.0169575	0.0169575	0.140385	0.0957236	0.14382	0.0866407	0.163406	0.169382	0.100299	0.151511	0.26335	0.211465	0.26335	0.309995	0.306282	0.346131	0.154068	0.312325	0.211465	gst-25	-0.0636547	-1.7665	-1.8651	-0.837222	-0.72271	0.13378	0.509342	-0.0455778	0.897071	0.922679	0.0173757	0.0981839	0.0171734	0.0412902	0.780392	0.859094
WBGene00001777	gst-29	1.84833	2.10641	1.67735	1.49699	1.60137	1.59382	1.80196	1.92243	1.38094	0.609498	0.629408	0.728255	0.94589	0.993491	0.898	0.547709	0.75067	0.381028	1.10134	1.25552	1.24336	1.63826	1.40626	1.57111	0.543824	0.949999	0.729335	gst-29	-0.257611	-0.135684	-1.5087	-0.979171	-1.80913	-0.645495	-0.283253	-1.36721	0.102091	0.156199	0.363826	0.607436	4.85444e-07	4.73902e-06	0.000669835	0.00323589
WBGene00001778	gst-30	2.16449	1.67496	1.67735	1.88769	1.97857	1.95476	1.86853	1.74784	1.72157	0.737968	0.963501	1.2777	1.59382	1.37319	1.99957	1.28401	1.40164	1.30085	1.54886	1.56565	1.52607	2.15096	2.33053	2.48707	1.91274	1.80885	1.04526	gst-30	0.077987	-0.0436113	-0.900585	-0.175491	-0.46291	-0.245711	0.33162	-0.2505	0.643539	0.714371	0.797805	0.906162	0.000331712	0.00136804	0.179509	0.302732
WBGene00001780	gst-32	0.641366	0.781823	0.652248	0.743452	0.996025	0.780507	0.610753	0.571235	0.201717	0.275204	0.274186	0.506477	0.754237	0.62757	0.66043	0.547709	0.693904	0.381028	0.44916	0.557617	0.549909	0.778434	0.591483	0.872637	0.402362	0.412165	0.62757	gst-32	0.272239	-0.701375	-1.01137	-0.0155648	-0.403988	-0.422742	0.0885902	-0.551866	0.298027	0.383481	0.0351082	0.150141	0.00881956	0.0232816	0.165258	0.285462
WBGene00001781	gst-33	1.44118	1.56669	1.49699	1.83989	2.24082	2.18712	1.90174	1.56669	1.76428	0.814351	0.801822	1.15263	1.04747	1.04579	0.925647	0.664084	0.626464	0.381028	1.10134	1.48494	1.16429	1.3772	1.13279	1.15016	1.35842	1.17798	1.32506	gst-33	0.467608	0.215498	-0.714324	-0.578333	-1.51572	-0.289211	-0.303629	-0.224963	0.00266806	0.00644363	0.150247	0.368186	0.000682144	0.00254496	0.085492	0.171626
WBGene00001783	gst-35	2.23362	2.87382	1.77657	7.32466	8.9905	7.72925	2.39336	2.33494	2.50531	1.26689	1.42184	1.69238	3.2457	3.21424	3.69108	1.69529	1.8208	1.35728	1.458	1.64162	1.24336	4.50254	5.04057	3.85019	2.43198	1.94486	2.23764	gst-35	1.83437	0.104664	-0.621735	0.591124	-0.487573	-0.645082	1.00099	-0.0298625	2.02019e-13	2.9758e-12	0.505836	0.723391	0.00281491	0.00877047	0.00174366	0.00715551
WBGene00001792	gst-44	3.49831	2.87382	2.76616	3.30297	3.78681	3.09512	3.27753	2.68755	3.13819	2.2097	2.20731	1.99103	2.33668	2.15887	2.99919	2.51129	2.18583	2.20449	2.52667	2.36751	2.47288	2.39763	2.9225	2.71835	2.68297	2.70038	2.831	gst-44	0.151835	-0.0106835	-0.519144	-0.309157	-0.416862	-0.308696	-0.191071	-0.153461	0.1909	0.26525	0.926737	0.968708	0.000533126	0.00205204	0.0189595	0.0516501
WBGene00001805	gur-4	1.84833	1.32981	1.37149	1.1086	1.24867	1.15771	1.4621	1.18846	1.27082	0.777282	1.07622	1.12127	1.4832	0.826967	1.06164	0.973983	1.08335	1.07104	1.19059	0.907391	0.920663	1.05608	1.13279	1.07104	1.29495	1.21233	1.43306	gur-4	-0.367734	-0.20999	-0.609116	-0.465405	-0.523224	-0.576878	-0.466222	-0.205095	0.0480456	0.0813105	0.225224	0.466762	0.00419876	0.012414	0.00505372	0.0173215
WBGene00001841	hen-1	0.404605	0.707884	0.580219	0.179976	0.204483	0.0557608	0.542482	0.439527	0.484815	0.171705	0.174276	0.163406	0.092211	0.174276	0.222487	0.0557608	0.100299	0.151511	0.571235	0.404605	0.409693	0.486198	0.447775	0.423735	0.402362	0.343787	0.246492	hen-1	-2.05001	-0.153632	-1.65984	-1.81897	-2.44818	-0.232119	-0.254134	-0.732751	0.000153087	0.000488456	0.582237	0.776359	0.000568462	0.00217121	0.424286	0.567994
WBGene00001855	hil-4	233.238	229.561	243.887	217.693	221.302	220.371	238.773	143.141	138.765	144.207	141.953	148.024	147.52	143.842	140.31	149.351	146.081	145.334	137.347	139.303	143.064	146.157	145.334	128.226	154.062	144.664	133.14	hil-4	-0.0998229	-0.483328	-0.70163	-0.710296	-0.680939	-0.75133	-0.750421	-0.711969	0.322803	0.409565	5.02704e-05	0.00450024	2.355e-07	2.52933e-06	6.52944e-08	1.47652e-06
WBGene00001858	hil-7	5.64142	4.75988	5.86536	0.698364	0.537469	0.833198	5.69333	4.87939	3.85831	2.76029	3.83687	3.66831	1.79548	2.06656	1.9425	5.25173	5.15805	6.05891	2.79578	3.16948	2.78963	1.29897	2.09289	1.49591	5.07465	4.33344	3.86444	hil-7	-2.95459	-0.178303	-0.666071	-1.47303	0.0223772	-0.89135	-1.73388	-0.297985	4.86572e-10	4.26137e-09	0.163794	0.387919	7.47999e-05	0.000374474	1.97696e-06	2.51899e-05
WBGene00001876	his-2	0.170646	0.165854	0.212778	0.376178	0.341222	0.423735	0.178866	0.0866407	0.129589	0.049777	0.049777	0.127199	0.12278	0.0557608	0.100299	0.129589	0.196961	0.123353	0.0488441	0.0590172	0.0888273	0.236835	0.165854	0.221458	0.12278	0.115381	0.314909	his-2	1.0587	-0.53079	-1.39864	-1.05551	-0.311638	-1.53295	0.169577	-0.154871	0.00641997	0.0140938	0.229569	0.471993	0.0144937	0.0356583	0.0082838	0.026053
WBGene00001898	his-24	27.1159	23.6837	26.8735	15.2171	17.5882	14.6751	25.3966	23.0809	21.6026	17.2017	18.8563	18.3432	24.6912	26.7329	25.5661	24.083	22.9806	22.8158	18.9819	19.1691	20.3868	23.9991	22.4312	18.3154	23.9991	23.366	21.5203	his-24	-0.714454	-0.148477	-0.512606	-0.0130812	-0.154875	-0.40841	-0.260823	-0.173858	9.42497e-10	7.83924e-09	0.0486279	0.184139	3.8734e-07	3.91556e-06	9.12716e-06	8.88625e-05
WBGene00001912	his-38	3.13111	3.6129	2.73936	0.743452	0.567005	0.62757	2.62767	3.01094	2.97331	1.32637	1.6095	1.92449	0.345064	0.414279	0.484815	1.92819	1.18748	1.35728	2.94995	3.13042	2.91936	0.486198	0.685773	0.669264	3.11084	2.93569	2.98751	his-38	-2.29305	-0.131188	-0.963437	-2.96193	-1.13372	-0.0658025	-2.39721	-0.0575014	3.12042e-10	2.81227e-09	0.281393	0.530325	9.46324e-07	8.52743e-06	0.586761	0.710817
WBGene00001914	his-40	2.1354	2.48025	2.45629	0.892127	1.12824	1.02501	2.8116	1.50016	1.34248	0.777282	1.00081	0.814351	0.482202	0.853299	0.814351	1.00788	0.913106	1.04633	2.00031	1.44304	1.88287	0.742306	0.753274	0.872637	1.15263	2.19627	1.53769	his-40	-1.21947	-0.378928	-1.44592	-1.75224	-1.242	-0.400188	-1.57618	-0.569859	5.36732e-05	0.000188038	0.0656669	0.222742	2.595e-05	0.000149235	0.0579648	0.126833
WBGene00001933	his-59	7.03523	6.34361	7.98107	7.20357	7.51735	7.82612	7.35905	4.24504	3.80784	3.71284	4.10732	3.81059	5.21029	5.21504	4.87081	4.01807	4.27575	4.32071	3.12104	3.16948	2.70923	4.99649	4.35207	4.6222	3.3307	4.24963	3.68242	his-59	0.0782562	-0.515333	-0.870047	-0.474617	-0.748438	-1.23864	-0.606475	-0.920953	0.524809	0.60933	0.000640114	0.0144563	3.65261e-06	2.75277e-05	3.61686e-08	8.83459e-07
WBGene00001934	his-60	7.27611	5.86416	6.73047	4.84986	5.22532	4.97771	6.72251	5.36613	5.2138	4.02125	3.80555	3.16512	4.87688	4.65647	4.80505	4.84184	4.57835	5.01256	3.54596	4.97771	3.80135	4.64421	4.54578	4.01355	4.51513	4.36789	4.67198	his-60	-0.404009	-0.205073	-0.870297	-0.472002	-0.461918	-0.718249	-0.586428	-0.553572	0.00058873	0.00165444	0.0483902	0.183572	5.9121e-08	7.63954e-07	6.11167e-07	9.67561e-06
WBGene00001936	his-62	3.05401	3.40169	3.69213	3.87219	3.10708	3.73553	3.79744	2.2947	2.32425	2.04643	2.20731	2.18456	3.4888	4.04827	3.74347	2.83414	2.4286	2.02485	1.90069	1.88424	1.80885	3.40864	3.74713	3.1907	1.66905	2.22565	2.31936	his-62	0.0852121	-0.295354	-0.647927	0.158351	-0.50225	-0.850435	0.0390137	-0.714928	0.541859	0.62528	0.0535234	0.19594	0.000534827	0.00205722	3.19703e-05	0.000250328
WBGene00001937	his-63	1.25092	1.11114	1.05492	1.22091	1.18946	1.1086	1.36511	0.47777	0.75067	0.412165	0.439527	0.698364	0.896232	0.468998	0.59979	0.427577	0.507819	0.715287	0.571235	0.746979	0.590267	0.707884	0.786693	0.708856	0.479036	0.636929	0.386511	his-63	0.0455492	-0.519791	-1.14243	-0.839663	-1.03684	-0.84823	-0.617772	-1.19239	0.84127	0.879081	0.0493703	0.186071	0.00149184	0.00504455	0.00580224	0.0194344
WBGene00001942	his-68	23.0832	22.1411	24.9895	20.0301	18.8905	20.3783	23.897	19.0411	17.1223	16.6974	14.5441	15.2231	16.9095	17.3068	18.9985	16.3784	18.0763	16.3521	15.7642	15.8702	16.9095	16.4078	16.9415	15.7445	17.059	17.1057	15.2309	his-68	-0.242336	-0.232517	-0.596483	-0.402357	-0.465493	-0.531879	-0.511849	-0.506715	0.00406447	0.00939916	0.00517892	0.0457024	8.66872e-08	1.06786e-06	4.25297e-07	7.19195e-06
WBGene00001946	his-72	184.125	192.407	211.28	303.499	316.793	326.114	206.201	126.142	116.485	129.937	122.42	127.989	224.31	210.534	196.829	153.225	155.567	163.239	129.206	123.618	127.797	188.972	193.802	156.868	144.207	145.433	130.433	his-72	0.687858	-0.42985	-0.624592	0.105452	-0.312478	-0.622955	-0.12224	-0.482689	3.72079e-07	2.01368e-06	0.000575347	0.0136504	6.93028e-06	4.77233e-05	6.61287e-06	6.84013e-05
WBGene00001948	hlh-1	4.25408	3.64021	4.45767	2.46007	2.06512	2.89216	3.72006	3.612	3.40989	2.89358	2.77598	2.6574	1.93783	2.58179	1.9425	3.28161	3.00031	3.06189	2.89024	3.33144	3.00825	2.06656	3.42044	2.33494	3.02983	2.93569	2.86149	hlh-1	-0.746588	-0.198688	-0.569562	-0.938869	-0.406198	-0.426481	-0.681045	-0.482946	7.36526e-06	3.08371e-05	0.104014	0.295263	0.000194543	0.000861455	0.00209289	0.00831172
WBGene00001958	hlh-14	1.32637	0.819985	1.22806	0.490807	0.371314	0.366258	1.43259	1.56669	1.23253	0.67057	0.698364	0.781823	0.865354	0.966785	0.781823	1.23973	0.879465	0.876408	0.63562	0.479036	0.980287	0.486198	0.591483	0.75067	0.795519	1.24103	0.842509	hlh-14	-1.43191	0.339936	-0.627415	-0.350953	-0.197819	-0.7245	-0.902236	-0.237413	8.96344e-05	0.000299823	0.0910277	0.271793	0.0171626	0.0412715	0.00706344	0.0228437
WBGene00001976	hmg-11	22.3051	21.5203	21.9338	24.3184	21.5588	23.8152	21.0971	15.7348	15.4021	14.326	14.5133	14.9536	21.046	22.1565	20.3508	18.7822	16.7904	18.0789	13.7488	13.8848	14.7376	19.0388	17.5449	16.8522	18.1234	15.2995	15.0922	hmg-11	0.0837368	-0.342749	-0.584398	-0.048983	-0.297356	-0.634439	-0.297059	-0.443351	0.281028	0.365643	0.000196566	0.0081865	2.04422e-07	2.23423e-06	4.07009e-08	9.79021e-07
WBGene00001981	hnd-1	1.92682	1.89832	2.07773	0.765711	0.782896	0.915166	1.83858	1.50016	1.67381	1.08663	1.14717	1.31081	0.999031	0.936158	0.841534	1.19181	1.00566	1.41337	0.786693	0.94589	0.663592	1.33564	0.786693	0.786693	1.32867	1.37149	1.21588	hnd-1	-1.2616	-0.238666	-0.727917	-1.08032	-0.71066	-1.31168	-1.04498	-0.588618	3.3474e-07	1.82239e-06	0.0968082	0.281808	0.000135016	0.000626625	2.50743e-07	4.6326e-06
WBGene00002051	ifa-3	2.68494	2.83693	3.30239	0.298269	0.234285	0.308848	2.95636	3.13819	2.71155	2.17851	2.16449	1.88892	0.754237	0.966785	0.898	3.10979	2.85201	3.33729	1.77533	2.33053	1.80885	1.01875	0.973362	0.996025	3.29741	2.46225	2.62767	ifa-3	-3.40474	0.0051956	-0.504913	-1.75865	0.0820258	-0.593902	-1.56161	-0.0785659	2.24719e-10	2.06929e-09	0.963912	0.985301	0.000626628	0.00236477	0.000102608	0.000665919
WBGene00002090	ins-7	3.59665	3.43712	3.36469	6.84172	7.07857	6.44058	3.30239	3.33316	3.6722	1.35842	1.66905	1.63369	4.39437	4.61939	4.0269	3.59341	3.71284	3.13703	3.27504	2.8015	3.36856	6.0396	6.3475	6.45228	4.02517	3.45335	3.68242	ins-7	0.96809	-0.018314	-1.16057	0.326846	-0.00449009	-0.138611	0.854014	0.0977786	9.22315e-12	1.05519e-10	0.850985	0.932368	2.45047e-09	4.44231e-08	0.177666	0.300412
WBGene00002095	ins-12	0.580219	0.34017	0.413184	0.298269	0.204483	0.210348	0.314909	0.373631	0.525336	0.140385	0.049777	0.0957236	0.092211	0.0866407	0.222487	0.092211	0.253557	0.210348	0.0488441	0.133009	0.155218	0.273059	0.127199	0.176446	0.222487	0.513777	0.246492	ins-12	-0.883885	-0.16265	-2.30554	-1.86504	-1.31296	-2.15101	-1.25042	-0.516868	0.0411576	0.071376	0.639896	0.815997	0.000847792	0.00307639	0.000815873	0.00382681
WBGene00002102	ins-19	3.4029	4.01751	3.42424	0.049777	0.0866407	0.0557608	3.4441	4.5091	4.45881	2.10828	2.09537	1.96025	0.204483	0.0557608	0.404605	4.13266	3.78681	3.37392	1.74784	0.746979	1.0519	0.167091	0.127199	0.26335	4.39285	3.03438	4.14112	ins-19	-5.95646	0.189595	-0.816549	-4.52926	0.0513475	-1.66828	-4.42871	0.0811144	3.37989e-06	1.51402e-05	0.232314	0.474602	0.000339608	0.0013963	7.50134e-07	1.13778e-05
WBGene00002107	ins-24	1.44118	1.79058	1.81236	1.28798	1.46407	1.53086	1.63369	0.706068	1.08916	1.15628	1.07622	0.629408	0.896232	0.877423	0.841534	1.15628	1.12379	0.97925	0.786693	0.867561	0.44667	0.814351	0.87529	0.467086	0.684565	0.741324	0.766279	ins-24	-0.234771	-0.628369	-0.881356	-0.93745	-0.632266	-1.31233	-1.23934	-1.19634	0.266151	0.349613	0.00937723	0.0661467	0.0015997	0.005354	8.94844e-05	0.000594748
WBGene00002110	ins-27	5.61644	5.25576	4.90654	4.6999	4.41827	4.90898	4.37587	3.01094	2.92311	3.54869	3.88179	2.68013	3.05088	3.23126	3.85935	3.2346	4.46212	4.15059	3.27504	3.79568	3.68592	2.78963	2.9888	3.62781	4.05947	3.60163	3.90003	ins-27	-0.171037	-0.633006	-0.672951	-0.651746	-0.411783	-0.563224	-0.769906	-0.45187	0.178399	0.250733	6.50043e-05	0.00495486	5.18308e-05	0.000272606	0.000259976	0.00144065
WBGene00002113	ins-30	3.83687	3.11141	3.8929	3.90176	4.50388	4.15059	3.55328	1.08565	1.12688	1.35842	1.75873	1.31081	1.56274	1.49699	1.57111	1.19181	1.63246	1.18797	1.57111	1.10134	1.56565	1.46864	1.73097	1.29495	1.22091	1.17798	1.18521	ins-30	0.205392	-1.11312	-1.29353	-1.21431	-1.42843	-1.34312	-1.2491	-1.5786	0.252493	0.334941	6.83144e-05	0.00502719	3.70644e-05	0.000203766	2.15266e-05	0.000179478
WBGene00002130	inx-8	80.4323	76.9576	80.1956	23.5634	21.5154	21.6248	77.649	76.9802	77.649	55.8802	54.2093	54.4551	23.4485	22.0022	22.6314	52.3542	52.2115	52.6096	41.6886	40.1657	40.6059	23.7487	24.2937	26.2883	43.1793	40.6818	41.396	inx-8	-1.83069	-0.0329751	-0.530552	-1.80379	-0.596187	-0.955462	-1.68141	-0.924303	4.06964e-27	1.05489e-24	0.324473	0.57134	4.35072e-15	2.28966e-13	2.77777e-21	9.01522e-19
WBGene00002224	klp-13	1.11114	1.49143	1.67735	0.842509	0.754237	0.684565	0.842509	1.36565	1.52738	0.737968	0.963501	0.93904	0.671813	0.807674	0.721714	0.664084	0.913106	0.743452	1.15771	1.37257	1.35115	1.33564	0.786693	0.911899	1.08565	1.17798	1.4995	klp-13	-0.877672	-0.224885	-0.675209	-0.93496	-0.858921	-0.124014	-0.500888	-0.172585	0.00104927	0.00278508	0.263163	0.5098	0.00689567	0.0189369	0.532118	0.663886
WBGene00002235	kqt-3	5.28979	5.1219	5.0789	4.40836	4.03141	4.63042	4.19009	4.24504	4.21179	2.96205	2.94346	3.5254	3.10582	3.14175	2.63007	3.28161	3.18233	2.92311	4.63992	4.53326	4.30087	3.33787	3.94958	3.3488	4.86741	4.91113	4.37655	kqt-3	-0.246061	-0.292009	-0.711558	-0.800121	-0.727782	-0.199879	-0.539251	-0.131016	0.00720047	0.0156157	0.00178444	0.0242409	5.24251e-08	6.88704e-07	0.024941	0.064601
WBGene00002269	lec-6	295.917	283.142	292.648	455.294	436.453	464.774	313.526	245.632	240.737	178.512	198.052	188.623	306.04	323.363	306.564	199.513	204.769	208.376	250.514	227.343	238.538	319.076	317.807	294.48	264.365	276.47	257.63	lec-6	0.637138	-0.133072	-0.625963	0.102285	-0.507865	-0.282733	0.0959828	-0.127073	7.75706e-12	9.01117e-11	0.0331722	0.145378	6.81538e-11	1.70815e-09	6.2684e-05	0.000441022
WBGene00002271	lec-8	147.565	147.721	158.493	589.152	583.151	609.641	163.401	125.134	113.851	70.78	74.8647	73.0412	435.081	425.917	423.67	186.581	182.776	185.288	108.007	97.421	105.715	425.917	412.771	368.997	156.987	161.578	146.862	lec-8	1.97257	-0.186774	-1.05143	1.50123	0.290016	-0.542786	1.41196	0.0365953	9.74171e-23	7.19933e-21	0.0165739	0.0951217	1.50515e-13	6.12179e-12	7.8068e-08	1.70757e-06
WBGene00003093	lys-4	51.5252	50.3025	52.003	125.744	121.401	117.25	48.7878	48.3456	46.3742	9.28782	10.094	9.09261	31.0272	30.1174	32.2343	17.2198	19.6296	17.3425	15.259	14.9037	15.2902	53.5223	53.2201	51.0336	25.85	27.6531	28.8599	lys-4	1.2439	-0.0998567	-2.43503	-0.721722	-1.50537	-1.75721	0.0375873	-0.902809	7.68072e-24	7.02059e-22	0.023769	0.118644	7.6157e-25	3.07586e-22	2.09451e-23	1.45501e-20
WBGene00003094	lys-5	0.37194	0.559924	0.652248	0.490807	0.423735	0.45035	0.542482	0.439527	0.299501	0.240311	0.140385	0.28854	0.092211	0.204483	0.100299	0.312325	0.196961	0.537469	0.204483	0.324738	0.224709	0.596149	0.269248	0.346131	0.363901	0.412165	0.520555	lys-5	-0.157122	-0.276481	-1.2262	-2.01016	-0.638639	-1.05391	-0.404677	-0.253289	0.622623	0.696182	0.395533	0.63787	0.00740214	0.0200939	0.012173	0.0357351
WBGene00003095	lys-6	1.41213	1.18521	1.67735	1.04124	0.729335	1.24867	1.70041	1.43741	1.49143	0.377175	0.140385	0.127199	0.569914	0.443556	0.484815	0.469577	0.284702	0.479036	0.44916	0.594923	0.513777	0.980287	1.37149	0.75067	0.479036	0.545169	0.766279	lys-6	-0.521306	0.121606	-2.90921	-1.50504	-1.81918	-1.46212	-0.467597	-1.27443	0.0225749	0.0424765	0.516844	0.730588	2.05497e-06	1.67868e-05	2.84962e-05	0.000226808
WBGene00003096	lys-7	155.041	167.277	165.844	497.206	513.599	497.206	150.447	127.763	132.474	21.2286	23.2994	22.2432	355.033	361.231	371.232	20.5331	21.4061	19.3255	95.6446	86.5626	92.8248	411	387.396	427.025	73.2024	74.8863	78.1333	lys-7	1.62872	-0.250737	-2.87071	1.15686	-2.99707	-0.825877	1.32718	-1.10903	1.25862e-25	1.90074e-23	1.18138e-05	0.00195696	1.72853e-26	1.11183e-23	4.10209e-16	5.79195e-14
WBGene00003097	lys-8	160.095	162.107	167.892	68.1786	70.6199	70.4961	161.578	125.134	111.885	46.4687	47.934	51.3118	31.0577	32.5536	32.614	38.6504	41.9539	37.4641	104.108	93.665	98.975	37.5612	38.562	40.0878	71.1714	73.6875	74.0892	lys-8	-1.22752	-0.311907	-1.74789	-2.34743	-2.05371	-0.722536	-2.07686	-1.16181	4.10597e-16	9.6755e-15	8.0421e-05	0.00531187	3.61973e-19	4.39608e-17	4.71999e-11	2.30907e-09
WBGene00003099	lys-10	2.819	2.43714	2.35979	16.8872	16.0219	15.8661	2.35137	2.33494	2.85923	0.0808829	0.112896	0.127199	3.69623	3.51615	3.69108	0.169382	0.253557	0.151511	0.513777	0.594923	0.883744	7.91427	8.92555	8.70777	0.684565	0.706068	1.11114	lys-10	2.68437	-0.0267748	-4.61053	0.517266	-3.78419	-1.99299	1.74521	-1.65379	4.54339e-20	2.07645e-18	0.832697	0.923436	7.67853e-09	1.23819e-07	2.61402e-09	8.64161e-08
WBGene00003163	mdl-1	20.2967	19.3214	20.763	7.83207	7.68348	7.68348	21.9214	18.1097	19.3908	11.9216	12.4675	12.038	10.0446	10.2779	9.12622	13.2305	14.816	14.0075	12.9108	15.213	13.8321	7.42554	7.52098	7.28857	13.1796	14.6141	13.1246	mdl-1	-1.37799	-0.0272086	-0.729203	-1.03432	-0.519777	-0.533714	-1.43836	-0.562135	1.32998e-16	3.36211e-15	0.653522	0.823039	2.79298e-11	7.53195e-10	6.923e-09	2.05524e-07
WBGene00003167	mec-3	1.28464	0.924219	1.05492	0.892127	0.371314	0.599235	1.08077	1.66905	1.76428	0.377175	0.470739	0.698364	0.482202	0.573975	0.431352	0.511421	0.314909	0.537469	0.59979	0.98921	0.920663	0.67057	0.591483	0.62757	0.616643	0.44407	0.62757	mec-3	-0.858144	0.426422	-1.09581	-1.12728	-1.29053	-0.431742	-0.781651	-0.964723	0.00663968	0.014532	0.0571976	0.204519	0.00214182	0.00690879	0.101528	0.196329
WBGene00003169	mec-5	19.8194	18.007	20.2757	13.2055	13.5227	15.4278	20.3484	20.1742	19.1475	11.9493	14.6808	12.6785	11.2985	11.889	11.398	11.5185	12.167	13.1198	18.484	18.5709	17.504	11.4974	12.934	9.49715	19.3314	19.0411	18.1718	mec-5	-0.468159	0.0391042	-0.567915	-0.745535	-0.652288	-0.090567	-0.771527	-0.0394522	1.04321e-06	5.17788e-06	0.57764	0.772953	6.46133e-08	8.28147e-07	0.214503	0.345797
WBGene00003233	mgl-2	6.69799	6.21947	6.44058	8.23832	7.7178	7.16621	5.76187	8.23047	9.60636	3.47774	2.77598	3.29092	7.62266	8.6617	8.18251	3.14301	3.21813	2.96761	5.12014	4.29064	4.64131	9.83717	9.35158	9.40208	4.57961	4.60762	4.67198	mgl-2	0.257067	0.242619	-1.02479	0.334894	-1.05665	-0.459691	0.561577	-0.483175	0.0283016	0.0516405	0.0362664	0.153283	1.76734e-07	1.97132e-06	0.00108701	0.00483308
WBGene00003238	mig-1	16.1584	17.4111	18.4044	17.5726	15.3241	15.5822	17.5924	15.9557	14.9973	10.7062	10.391	11.3187	14.284	13.8339	13.5533	12.015	11.2658	11.0077	14.0527	12.5014	13.8848	17.0166	16.1706	14.6205	13.7151	13.9104	14.5558	mig-1	-0.0938999	-0.0944734	-0.673266	-0.313542	-0.599336	-0.355229	-0.112846	-0.297434	0.162747	0.231807	0.156632	0.377861	6.55756e-10	1.32733e-08	1.60023e-05	0.000141143
WBGene00003245	mig-13	7.27611	6.38146	7.47345	4.65096	4.27087	4.45454	7.25249	6.41824	6.51983	4.43213	4.10732	4.38551	4.34588	3.40587	3.85935	4.80033	4.64421	4.78279	5.31513	5.12014	5.56351	4.68643	4.91767	4.43669	5.96287	5.59255	5.3276	mig-13	-0.65532	-0.0661622	-0.706243	-0.869579	-0.569328	-0.399895	-0.583808	-0.324005	2.3594e-08	1.56695e-07	0.38663	0.630066	1.07538e-08	1.66602e-07	3.28753e-05	0.000256259
WBGene00003409	mrp-3	25.7108	28.5677	27.4128	18.8255	18.3182	18.8265	24.9945	31.6833	31.8457	16.5632	16.7968	16.1883	16.5268	18.4573	18.5425	16.5993	16.3508	17.5317	24.6967	25.3911	26.6305	18.5126	20.7954	19.0025	25.2781	26.7076	25.8621	mrp-3	-0.542251	0.107538	-0.719753	-0.609878	-0.690376	-0.0892179	-0.483846	-0.0661484	2.20749e-08	1.47736e-07	0.103645	0.294599	1.7349e-10	4.02269e-09	0.187698	0.313047
WBGene00003431	msp-33	23.4061	24.1483	26.0724	30.9012	29.945	28.9603	27.6784	15.2995	16.4748	15.5847	16.4748	17.1057	14.1585	11.7413	13.9969	13.6182	14.1506	15.3336	16.5715	16.7844	19.2161	14.4772	15.0781	12.2722	12.5443	15.0853	12.4743	msp-33	0.289422	-0.351421	-0.576458	-0.885965	-0.763334	-0.486169	-0.805891	-0.874913	0.01495	0.0296153	0.00676763	0.0541227	0.00010806	0.000515571	0.000527831	0.00263906
WBGene00003432	msp-36	32.2343	34.566	32.6197	41.7264	41.51	38.9776	35.6926	19.67	18.7396	20.3843	21.4594	21.2566	16.2282	15.9243	15.8109	14.9299	16.4632	17.2536	21.0229	21.3181	20.09	21.0658	19.2794	17.0551	15.7279	17.4788	14.4268	msp-36	0.29979	-0.476173	-0.649811	-1.04412	-1.01955	-0.666136	-0.783443	-1.05734	0.0114377	0.023441	0.00049529	0.0125756	2.13029e-05	0.000125626	1.28653e-05	0.00011772
WBGene00003449	msp-56	11.4572	11.5732	12.989	13.6475	12.211	12.3011	11.8371	5.79299	6.73427	6.27881	7.43076	7.17757	4.45824	5.47623	5.3218	6.41938	5.78409	5.75237	6.52495	7.12434	7.5457	6.15166	7.14599	6.96072	6.48269	5.59255	6.03071	msp-56	0.0881884	-0.626165	-0.785444	-1.2433	-1.00962	-0.769084	-0.832546	-0.992955	0.473544	0.56202	7.93697e-05	0.00531187	9.19712e-06	6.08482e-05	8.88049e-06	8.7085e-05
WBGene00003473	mtl-1	3.73553	3.78681	4.54641	46.3427	49.0119	52.0683	4.19009	4.43162	4.00836	0.814351	1.0391	0.698364	25.3856	24.8676	25.1526	1.1191	1.22091	1.41337	3.31485	2.40449	2.70923	46.2011	43.4381	43.9082	7.17279	5.66806	5.54717	mtl-1	3.60699	0.0728228	-2.25333	2.64454	-1.66394	-0.50816	3.46882	0.602415	7.30172e-24	6.70946e-22	0.543129	0.74893	8.69589e-10	1.71811e-08	0.000796688	0.00374555
WBGene00003474	mtl-2	66.3417	66.4989	69.504	10.7717	11.4944	11.3702	74.6101	61.3692	62.7491	22.7155	19.66	20.5152	8.51266	8.18437	7.9542	22.2432	19.3064	20.9602	42.0629	39.1509	38.1692	12.0169	10.9393	10.7448	54.6788	55.6181	52.0411	mtl-2	-2.59049	-0.0298688	-1.68862	-3.03521	-1.69986	-0.759678	-2.5836	-0.317569	4.70448e-23	3.71376e-21	0.574286	0.771116	1.75431e-20	2.67256e-18	1.30058e-13	1.17641e-11
WBGene00003522	nas-3	6.09221	6.21947	6.10235	0.298269	0.204483	0.308848	6.69605	6.56749	5.75969	3.76509	4.10732	4.49596	0.26335	0.341222	0.341797	5.3207	4.57835	5.53338	3.65073	3.13042	2.78963	0.167091	0.306282	0.26335	6.31106	4.1134	5.3276	nas-3	-4.48492	0.0487044	-0.569748	-4.26284	-0.257541	-0.940048	-4.6533	-0.248352	3.59017e-10	3.21064e-09	0.641811	0.81712	5.79515e-05	0.000300252	7.52242e-08	1.65579e-06
WBGene00003543	nas-24	2.36924	2.0193	2.18328	0.892127	0.537469	0.864249	1.73574	2.448	2.32425	1.4621	1.38446	1.60137	0.728255	0.702891	0.841534	1.69529	2.10569	1.91274	1.10134	0.746979	1.16429	0.980287	0.939661	0.669264	1.25337	0.741324	0.942246	nas-24	-1.51839	-0.0352037	-0.553339	-1.52036	-0.196265	-1.12146	-1.31932	-1.18387	6.22409e-07	3.22283e-06	0.816272	0.914417	0.00393416	0.0117336	8.47171e-06	8.41214e-05
WBGene00003577	ndg-4	84.1211	82.2869	89.3966	38.5086	40.3587	38.7366	86.753	97.9799	93.7624	47.8626	48.4964	48.1649	35.8233	37.5193	37.5774	57.1501	58.8039	53.1919	74.9792	70.802	70.0086	44.7824	43.6086	48.3749	74.6536	81.9102	79.9842	ndg-4	-1.12239	0.121085	-0.823801	-1.2064	-0.599655	-0.244334	-0.908174	-0.113405	2.26385e-19	9.361e-18	0.0104455	0.0706692	3.41039e-16	2.21001e-14	1.05134e-05	9.9992e-05
WBGene00003626	nhr-32	10.0608	11.2413	11.0899	10.2112	10.2524	9.45358	11.2168	10.7688	9.66722	8.31756	7.23713	7.3616	8.41644	8.22276	7.26291	7.07857	7.20659	7.08018	7.25062	7.80744	8.35377	6.96009	8.72148	8.87006	7.68602	7.20779	7.29405	nhr-32	-0.109841	-0.028196	-0.500193	-0.434238	-0.596557	-0.470612	-0.410453	-0.542658	0.164247	0.233638	0.710768	0.857103	2.02774e-06	1.65877e-05	3.74156e-06	4.2526e-05
WBGene00003645	nhr-55	6.52334	6.21947	6.5925	5.8672	6.51143	6.00416	6.86551	6.84172	6.06291	3.17352	3.38214	3.5254	4.41827	4.11932	4.28108	5.74391	6.15075	5.20544	3.88642	4.10984	3.97528	4.64421	4.84812	5.26695	5.91917	6.60716	6.32225	nhr-55	-0.0781804	0.0323982	-0.940953	-0.595893	-0.185591	-0.696322	-0.398845	-0.0387355	0.301178	0.386962	0.657529	0.82575	6.04661e-11	1.53301e-09	5.66506e-09	1.72303e-07
WBGene00003648	nhr-58	1.70849	2.25894	2.11503	3.84531	3.35423	4.11831	2.31434	2.09413	1.52738	1.43259	1.32375	1.34248	2.59266	2.45343	2.48025	1.40786	1.75499	1.56849	1.54886	1.72157	1.63369	2.9375	3.52341	2.71835	1.66905	1.65808	2.20615	nhr-58	0.908027	-0.0251621	-0.548718	0.324853	-0.338611	-0.295811	0.612794	-0.133539	2.54722e-07	1.42015e-06	0.867758	0.939621	0.00401195	0.011943	0.0758752	0.156481
WBGene00003658	nhr-68	29.1514	30.5104	28.9785	9.61813	8.32344	7.21725	26.4603	30.1102	30.6548	14.4555	14.7596	13.3684	9.02798	8.83342	9.16801	9.93574	7.96698	9.1999	20.3676	21.3181	21.2326	13.7488	13.8787	14.9146	22.5963	20.6298	24.6803	nhr-68	-1.82074	-0.0270748	-1.06286	-1.71704	-1.72414	-0.496174	-1.06509	-0.389096	3.90936e-18	1.31577e-16	0.670046	0.83447	4.41793e-14	1.92779e-12	5.60667e-08	1.29311e-06
WBGene00003689	nhr-99	2.05706	1.70849	1.77657	0.490807	0.341222	0.539892	1.52494	2.40507	2.21228	0.918312	1.28237	1.18395	0.405182	0.443556	0.374208	1.1191	0.851439	1.18797	2.15096	1.52607	1.59895	0.559924	0.374786	0.423735	1.35842	2.0471	1.704	nhr-99	-2.01043	0.114429	-0.71413	-2.15341	-0.818091	-0.0708984	-2.01793	-0.135134	1.02889e-06	5.11559e-06	0.496521	0.717861	0.00203021	0.00659657	0.688202	0.79236
WBGene00003700	nhr-110	3.1658	3.22755	3.21039	3.97528	4.32671	4.15059	4.19009	3.40989	4.49934	1.59382	2.30401	2.12492	3.66831	3.68122	3.49058	2.35137	2.2821	2.35009	2.2097	2.72702	2.17084	3.76454	3.74713	4.80505	2.65478	3.37609	3.27372	nhr-110	0.373073	0.320392	-0.693084	0.176958	-0.464241	-0.453824	0.336301	-0.0532588	0.0032693	0.00773541	0.00994919	0.0684285	6.15624e-05	0.000316327	0.00225356	0.00884466
WBGene00003704	nhr-114	54.1203	54.4073	56.419	26.2755	26.5955	27.9433	51.3354	37.0468	38.41	30.2474	33.9124	32.2642	38.2162	34.9464	35.3671	36.3046	32.2839	34.5306	35.3139	40.4685	39.3854	30.4317	32.26	28.4688	57.3393	54.6052	52.1133	nhr-114	-1.03095	-0.392337	-0.775649	-0.604521	-0.68183	-0.524343	-0.853275	-0.00829725	4.42463e-13	6.18202e-12	1.16907e-05	0.00195696	1.61273e-10	3.74943e-09	1.56027e-07	3.10748e-06
WBGene00003711	nhr-121	7.65284	7.75886	7.93834	6.13971	5.31844	6.23774	7.70998	7.45619	8.55803	4.0558	3.8547	3.99831	4.25632	3.85134	4.13912	5.00525	5.03931	4.64792	6.69799	6.11547	5.72086	5.27466	5.85981	5.8333	5.87149	6.55433	5.64258	nhr-121	-0.40062	0.0175023	-0.971214	-0.933235	-0.672364	-0.331376	-0.46416	-0.370974	1.89429e-05	7.30422e-05	0.808987	0.911608	2.43791e-11	6.64664e-10	0.0001891	0.00110316
WBGene00003750	nlp-12	5.56351	5.1219	6.23514	5.97832	6.47271	5.92088	5.05803	3.07851	2.85923	3.58011	3.31688	3.96985	4.25632	4.24262	3.56182	4.0558	3.6732	3.94278	3.35472	3.70416	3.93833	4.17873	3.84904	3.45024	3.7986	3.83166	3.72006	nlp-12	0.118598	-0.653272	-0.63066	-0.483232	-0.533576	-0.623421	-0.549093	-0.570457	0.30409	0.390039	2.67831e-05	0.00320788	6.45203e-05	0.000328792	5.51262e-05	0.000396758
WBGene00003773	nlt-1	24.6967	22.8947	24.7793	27.3246	28.3444	27.6485	22.4312	22.9385	23.0012	15.7239	16.5895	13.5533	17.1558	18.0285	17.4006	19.2523	20.5939	19.6403	16.7904	18.439	18.9477	20.1004	20.2612	20.6486	19.2202	19.3214	19.4657	nlt-1	0.201608	-0.0833782	-0.670258	-0.462061	-0.283319	-0.424687	-0.248958	-0.320407	0.00039237	0.00114893	0.116384	0.316313	3.16399e-12	1.01569e-10	1.74977e-08	4.6561e-07
WBGene00003786	npa-1	205.265	200.075	207.864	194.108	190.303	191.037	210.438	220.481	214.45	138.6	147.918	137.446	122.791	128.649	127.408	142.821	151.374	153.421	161.799	164.762	175.414	142.327	139.794	138.333	166.822	166.059	164.321	npa-1	-0.0914925	0.0734344	-0.533721	-0.695059	-0.453199	-0.290158	-0.544062	-0.302567	0.00842599	0.0179002	0.0288166	0.133534	1.13955e-15	6.73149e-14	1.17743e-09	4.26008e-08
WBGene00003828	nuc-1	98.9059	101.557	98.5361	70.1088	70.7643	68.6676	108.135	102.567	104.077	20.3551	20.7847	20.4082	33.224	33.9378	32.3521	44.1208	40.8564	40.4458	50.0755	48.7007	48.8687	62.5248	64.3917	61.966	76.717	71.3856	72.9636	nuc-1	-0.512492	0.0744756	-2.2807	-1.58648	-1.25754	-1.01711	-0.661751	-0.436033	2.83047e-15	5.71595e-14	0.0254991	0.123664	4.6347e-29	6.70757e-26	1.81401e-22	9.26587e-20
WBGene00003837	oat-1	12.7146	13.2524	10.9465	8.67701	10.1134	9.40583	12.8038	12.0411	12.319	7.74925	8.94567	7.92308	7.5457	7.90221	7.62992	9.10435	8.80092	8.76587	10.9953	12.0264	10.2995	8.20931	7.93361	10.0291	9.20901	10.0857	10.305	oat-1	-0.392766	0.0151461	-0.586897	-0.675096	-0.468103	-0.148297	-0.512895	-0.316068	3.50598e-05	0.000128024	0.839965	0.927261	1.5344e-07	1.75085e-06	0.0640578	0.137311
WBGene00003844	odc-1	90.3856	100.164	96.4934	79.043	80.229	78.4467	86.8359	84.683	83.3656	36.9895	39.4652	36.9114	38.5654	37.7641	40.5825	31.0224	28.4915	31.2623	44.4777	46.4534	45.5032	60.8775	59.3945	59.6296	40.8479	37.9367	40.2769	odc-1	-0.269785	-0.168754	-1.34026	-1.29601	-1.66141	-1.07257	-0.671971	-1.26894	7.2677e-08	4.45685e-07	8.85614e-05	0.0056133	2.54258e-23	7.3595e-21	2.54102e-21	8.48652e-19
WBGene00003845	odd-1	1.04747	0.884456	0.819985	0.541228	0.537469	0.392683	1.04747	1.29495	1.19437	0.311275	0.565771	0.728255	0.314909	0.548838	0.374208	0.664084	0.539393	0.663592	0.902609	1.10134	0.951955	0.559924	0.341222	0.829635	1.50287	1.13913	1.00664	odd-1	-0.909376	0.357904	-0.84095	-1.18566	-0.5678	0.0915914	-0.797483	0.390292	0.00416439	0.00960976	0.10681	0.300109	0.00800459	0.0214464	0.688245	0.79236
WBGene00003846	odd-2	4.17294	4.01751	4.67586	1.86496	2.10061	2.06303	3.75669	4.54641	4.49934	2.50403	2.63932	2.43714	2.33668	1.60137	2.92065	3.32169	2.95636	3.28111	3.5897	3.74834	2.47288	2.72122	1.95375	2.45068	3.44251	4.47646	3.83687	odd-2	-1.10727	-0.0139636	-0.770159	-0.969499	-0.434017	-0.414388	-0.876565	-0.135985	9.00371e-07	4.53108e-06	0.917847	0.964847	6.50873e-05	0.000331201	0.00883153	0.0274427
WBGene00003947	pbs-1	221.978	208.979	235.493	253.474	258.019	271.747	239.799	161.265	151.482	146.81	154.915	161.265	171.128	157.878	160.855	166.235	163.401	168.739	152.778	160.095	159.57	168.983	177.995	137.914	172.017	178.512	154.636	pbs-1	0.232569	-0.296839	-0.523941	-0.443412	-0.417644	-0.495832	-0.460723	-0.400406	0.0192704	0.0369188	0.00453766	0.0419848	1.16661e-05	7.44871e-05	2.30138e-05	0.000189332
WBGene00003956	pcp-1	56.0048	54.5062	53.5529	23.8834	28.3958	26.51	62.2475	70.7307	73.2197	35.3894	37.1495	37.4721	24.6257	20.9121	23.573	38.4798	39.5515	39.3339	60.938	57.7612	57.565	26.4182	23.2994	26.1135	64.6399	63.3861	66.6476	pcp-1	-1.06809	0.324617	-0.577236	-1.2539	-0.483232	0.104118	-1.12001	0.246211	2.88752e-16	6.96493e-15	1.30168e-06	0.000370594	1.62214e-10	3.76628e-09	0.0657372	0.140081
WBGene00003958	pcp-3	109.142	113.074	109.662	250.239	248.538	246.216	105.392	116.264	111.981	43.0349	41.9622	43.139	161.799	165.684	165.171	79.7096	80.2636	74.6374	71.053	72.5287	71.4442	187.595	192.929	204.863	74.2005	69.3671	75.5046	pcp-3	1.16772	0.00682485	-1.37318	0.570591	-0.502414	-0.626412	0.817092	-0.600367	3.48623e-24	3.45973e-22	0.855495	0.934309	1.73904e-23	5.24742e-21	1.21052e-15	1.59266e-13
WBGene00003975	pen-2	17.8187	17.2411	18.1448	16.5178	16.557	17.0506	16.9488	12.8725	11.1966	11.9672	11.6908	12.6522	12.8754	12.6716	13.3614	13.4937	14.086	13.0024	11.9888	11.644	12.8432	13.6898	13.3784	13.6847	12.6484	13.0613	12.0477	pen-2	-0.0869226	-0.389222	-0.549004	-0.452514	-0.392029	-0.544717	-0.384431	-0.494445	0.263865	0.347084	3.45782e-05	0.00381306	4.0591e-07	4.08663e-06	3.52036e-07	6.10769e-06
WBGene00003996	pgp-2	66.7892	68.19	64.3771	119.759	115.468	115.909	63.451	82.774	82.0616	35.349	35.734	35.4948	76.7559	83.144	80.2439	38.5874	37.806	34.4172	59.3043	59.9069	57.6748	118.857	115.249	128.154	61.0742	64.5966	64.6061	pgp-2	0.818454	0.183587	-0.904255	0.268848	-0.853468	-0.1724	0.859258	-0.0671071	7.53705e-14	1.18508e-12	0.00663665	0.0534843	4.68211e-13	1.73378e-11	0.012998	0.0376729
WBGene00004062	pmp-5	80.4323	81.3342	78.2895	13.6475	13.6917	13.6676	76.4139	63.194	65.1775	12.3267	15.3542	14.0372	9.86314	9.39737	9.98648	13.2305	11.4609	12.4217	23.5516	25.7078	23.7148	17.6641	17.1747	16.9234	56.0493	55.9833	57.7734	pmp-5	-2.55093	-0.232943	-2.53118	-3.04052	-2.7015	-1.72213	-2.21373	-0.49968	1.89731e-24	2.05421e-22	4.95255e-05	0.00447974	3.95037e-24	1.37212e-21	3.7648e-22	1.72061e-19
WBGene00004088	ppk-2	62.874	58.9623	63.1813	58.4872	62.8526	66.1189	61.7277	40.7554	39.7256	37.3322	38.029	41.6012	44.5605	44.9189	46.3012	43.4069	39.6059	39.9015	40.7355	40.4311	44.9729	45.1137	43.8616	45.6474	45.9982	42.9046	41.2861	ppk-2	0.014288	-0.405861	-0.661106	-0.447404	-0.5949	-0.555001	-0.460142	-0.50852	0.869412	0.901599	9.48298e-05	0.00574976	1.16918e-07	1.38036e-06	1.55302e-06	2.07311e-05
WBGene00004168	pqn-88	3.05401	4.12174	3.42424	1.62518	1.77363	1.72903	3.08772	3.10907	2.85923	2.27976	2.33558	2.12492	1.87337	1.8148	1.73917	3.03323	2.21743	2.74301	1.67735	1.68088	2.09175	1.56849	1.66745	1.78164	2.77192	1.87337	1.96177	pqn-88	-1.04204	-0.207656	-0.644193	-0.953068	-0.412355	-0.959004	-1.07864	-0.690615	1.67129e-07	9.64297e-07	0.0948691	0.278639	6.74903e-05	0.000341721	4.93798e-07	8.07705e-06
WBGene00004183	prk-2	8.9124	9.18391	7.8834	13.0613	13.6917	13.228	8.86712	7.45619	6.83691	3.94453	3.21749	3.88353	6.34113	6.64775	5.78157	4.92107	4.67078	5.56351	5.62629	4.83905	5.52337	7.61206	7.24137	7.95108	8.04904	8.19383	8.05705	prk-2	0.623058	-0.16442	-1.22701	-0.462244	-0.769021	-0.691204	-0.186823	-0.0920483	6.10754e-09	4.46797e-08	0.0582827	0.206697	9.77718e-12	2.94281e-10	5.13032e-08	1.19595e-06
WBGene00004233	ptr-19	2.56394	2.95636	3.03662	1.33338	1.24867	1.15771	2.18219	3.16385	2.79854	1.72157	1.64162	1.69238	1.34749	1.83923	1.4621	1.73755	1.63246	1.77533	2.06007	1.92293	1.84394	1.737	1.37149	1.74723	1.73471	1.83989	2.62767	ptr-19	-1.18548	-0.0826492	-0.75289	-0.882374	-0.727837	-0.545097	-0.828366	-0.486225	3.52712e-07	1.91483e-06	0.533953	0.741853	6.36064e-05	0.000324707	0.000985486	0.00446166
WBGene00004238	ptr-24	59.8351	67.281	63.2156	48.5049	48.3178	47.4024	68.2914	81.3747	77.9167	40.9705	40.4458	40.6591	37.2653	35.8005	37.2618	52.4588	51.8999	50.8325	61.0122	57.4418	61.9387	50.7617	51.3243	53.6567	72.647	74.2637	72.1994	ptr-24	-0.396754	0.256686	-0.637926	-0.784619	-0.292384	-0.0736842	-0.288374	0.206746	7.84126e-09	5.64123e-08	5.42693e-06	0.0011181	5.36361e-13	1.97351e-11	0.132141	0.240529
WBGene00004285	rab-37	1.22091	1.25609	1.15628	1.24735	0.943338	0.864249	1.15263	0.814351	1.12688	0.737968	0.771209	0.753274	0.896232	0.754237	0.868797	0.973983	0.879465	1.07104	1.19059	0.746979	0.663592	0.742306	0.786693	1.41213	1.08565	0.917178	1.00664	rab-37	-0.249027	-0.252212	-0.68107	-0.532804	-0.311834	-0.502516	-0.402566	-0.274268	0.225441	0.304688	0.211499	0.448926	0.00629769	0.0175331	0.0271706	0.0692981
WBGene00004335	ref-2	1.81167	1.97387	1.95317	0.743452	0.513777	0.62757	1.83858	1.25609	2.06421	0.980287	1.18521	1.24103	1.34749	1.19668	1.51896	1.77937	2.00722	1.38094	1.22091	1.33165	1.35115	1.29897	1.17673	1.25903	1.94998	1.52847	1.77937	ref-2	-1.62079	-0.192897	-0.75795	-0.51166	-0.178513	-0.563286	-0.626241	-0.132516	3.37774e-07	1.83776e-06	0.22305	0.464194	0.000362182	0.00147388	0.00286258	0.0108004
WBGene00004388	rnp-5	106.389	109.231	114.804	112.749	113.168	121.619	115.012	68.4071	69.7168	69.3801	67.2226	68.8899	84.2734	81.167	80.6408	75.6238	72.1373	73.0476	70.3735	71.529	72.9636	83.144	82.484	67.4307	74.7994	76.2654	67.3976	rnp-5	0.0722406	-0.422808	-0.683283	-0.423752	-0.581265	-0.61974	-0.502408	-0.596782	0.475394	0.563759	0.000317738	0.0101592	6.65762e-07	6.26343e-06	2.60107e-06	3.15452e-05
WBGene00004393	rnt-1	1.64279	1.86386	1.71902	1.38307	1.46407	1.50016	1.73574	2.18995	1.98982	0.737968	0.771209	1.02855	1.0212	1.10134	1.27491	1.00788	1.12379	1.38094	0.935404	0.94589	1.35115	1.53769	1.04124	1.07104	1.29495	1.17798	0.973362	rnt-1	-0.26208	0.177045	-1.03261	-0.623059	-0.557801	-0.708915	-0.522378	-0.599271	0.108308	0.16402	0.227821	0.469979	2.34106e-05	0.000136479	0.000449025	0.00229225
WBGene00004438	rpl-25.1	229.782	226.593	247.38	141.68	146.526	162.227	242.845	145.914	142.777	140.789	147.666	149.993	109.785	102.297	94.589	145.592	149.056	150.346	150.779	140.75	159.139	99.3361	104.167	81.167	161.359	162.89	147.24	rpl-25.1	-0.64595	-0.44558	-0.680735	-1.19748	-0.658913	-0.642297	-1.30503	-0.577383	2.84422e-06	1.29409e-05	0.000325937	0.0102886	1.41478e-06	1.20326e-05	3.15202e-06	3.69873e-05
WBGene00004442	rpl-28	618.58	591.402	663.729	526.772	529.828	553.046	658.452	393.784	387.396	364.529	381.831	373.028	324.909	331.391	322.05	392.199	389.435	395.524	395.524	380.773	390.346	338.626	338.626	296.811	427.025	408.734	361.231	rpl-28	-0.218555	-0.421424	-0.741637	-0.935524	-0.668805	-0.681489	-0.942009	-0.648009	0.0401424	0.069902	0.000305552	0.00999346	1.1645e-07	1.37671e-06	4.46698e-07	7.43085e-06
WBGene00004448	rpl-34	677.914	677.914	704.229	586.954	589.152	591.402	698.077	473.204	520.472	465.992	456.834	471.616	417.081	421.194	387.396	465.992	471.616	488.311	515.103	470.283	502.964	423.67	432.304	374.492	518.561	516.928	484.039	rpl-34	-0.22062	-0.30276	-0.562133	-0.748568	-0.529589	-0.468222	-0.742863	-0.439034	0.00529424	0.0118562	0.000282872	0.00969923	3.41182e-08	4.7096e-07	7.59697e-07	1.15028e-05
WBGene00004450	rpl-36	757.455	784.733	804.756	686.633	665.642	695.307	811.642	549.598	556.647	519.516	549.598	533.041	449.817	467.69	459.012	540.35	547.912	559.499	533.041	536.102	526.772	459.012	479.72	399.307	585.054	595.635	536.102	rpl-36	-0.196029	-0.312682	-0.549976	-0.768643	-0.508658	-0.555319	-0.810506	-0.451176	0.0190162	0.0364761	0.000467031	0.0123266	2.10546e-07	2.29107e-06	1.63525e-07	3.22973e-06
WBGene00004456	rpl-43	541.948	583.151	609.641	523.792	541.948	543.603	624.891	475.513	400.109	360.448	384.656	379.656	371.805	371.805	361.996	386.717	362.657	379.656	398.139	389.435	386.717	387.396	378.882	310.013	429.678	411	396.585	rpl-43	-0.106476	-0.227791	-0.622495	-0.646898	-0.617891	-0.559843	-0.688694	-0.485511	0.214703	0.29278	0.0114188	0.0746653	8.38282e-08	1.03841e-06	4.76233e-07	7.84701e-06
WBGene00004474	rps-5	1360.91	1350.56	1451.39	1322.7	1379.55	1409.29	1451.39	1104.35	982.961	903.849	972.473	1021.57	955.744	921.334	903.849	1031.22	1010.32	986.813	1037.75	978.379	982.961	903.849	918.988	832.761	1057.46	1057.46	991.869	rps-5	-0.018435	-0.250518	-0.522369	-0.581154	-0.459094	-0.471778	-0.647099	-0.421719	0.798554	0.845124	0.00168899	0.0236224	1.04189e-07	1.24876e-06	5.58223e-07	8.9434e-06
WBGene00004490	rps-21	444.243	442.855	474.346	364.529	384.656	392.199	479.72	341.501	326.78	301.423	319.598	300.573	254.057	248.059	262.664	324.909	326.78	318.382	321.656	321.656	331.857	267.702	273.248	233.967	344.919	360.448	327.597	rps-21	-0.25528	-0.264684	-0.562975	-0.831952	-0.488498	-0.480793	-0.81251	-0.398283	0.00237192	0.00579296	0.00167953	0.023561	7.7127e-08	9.65033e-07	1.04016e-06	1.48801e-05
WBGene00004491	rps-22	858.134	858.134	865.917	775.575	764.314	798.325	870.728	647.346	613.738	568.989	618.58	573.828	557.752	533.041	533.041	583.151	581.049	567.275	593.437	606.737	585.054	595.635	585.054	534.837	618.58	631.601	581.049	rps-22	-0.143457	-0.291725	-0.553036	-0.669153	-0.576934	-0.532659	-0.589418	-0.496219	0.0391822	0.0684309	0.000149428	0.00717525	7.63288e-09	1.23508e-07	1.42762e-08	3.91063e-07
WBGene00004496	rps-27	663.729	668.711	671.732	575.714	577.487	559.499	677.914	424.745	425.917	386.717	409.999	408.734	377.082	340.051	363.617	433.768	409.999	418.403	422.347	416.32	418.403	360.448	372.334	277.706	442.855	445.412	414.482	rps-27	-0.226331	-0.424097	-0.732858	-0.891879	-0.667691	-0.672102	-0.993636	-0.62142	0.0276849	0.0507124	0.000176688	0.00769057	6.61894e-08	8.43988e-07	2.70819e-07	4.91978e-06
WBGene00004498	rps-29	498.63	522.272	526.772	459.012	459.012	459.012	528.207	244.972	234.824	209.727	222.382	211.453	188.467	189.331	180.821	224.014	215.542	222.848	238.235	221.791	230.565	204.076	206.592	179.823	262.664	254.616	223.584	rps-29	-0.167431	-0.718751	-1.26461	-1.46788	-1.22281	-1.16186	-1.38793	-1.06405	0.241001	0.32248	2.81668e-05	0.00328065	4.18342e-09	7.17919e-08	1.72583e-08	4.61116e-07
WBGene00004499	rps-30	950.313	926.048	961.017	865.917	862.489	849.95	950.313	634.696	668.711	658.452	647.346	647.346	609.641	606.737	565.454	641.757	652.785	683.65	641.757	650.544	650.544	609.641	609.641	531.414	695.307	711.133	658.452	rps-30	-0.137898	-0.354359	-0.538551	-0.671005	-0.519485	-0.546302	-0.69652	-0.458776	0.078781	0.124767	7.14201e-05	0.00508718	1.51307e-07	1.73076e-06	1.08099e-07	2.26188e-06
WBGene00004677		15.9793	12.2796	14.6205	8.23832	7.35569	6.10352	11.6998	10.5063	6.66322	5.16729	8.19383	6.52741	5.04527	4.97771	7.47086	6.66322	3.52238	5.37949	7.00205	37.9151	6.46006	8.90879	5.94721	6.84852	6.52334	8.31875	13.0054		-0.99507	-0.60184	-1.14718	-1.34502	-1.54653	-0.30853	-1.01493	-0.692201	0.0193232	0.0370077	0.108418	0.302571	0.0117082	0.0296928	0.378521	0.523431
WBGene00004743	scm-1	73.7478	72.3034	74.5211	85.7846	88.2568	87.7169	75.9735	50.734	47.3538	47.5848	47.1993	50.8248	64.4118	63.1227	59.1704	54.5499	55.0783	55.5528	51.137	49.8674	52.103	62.2236	60.6611	55.0783	53.8686	55.7677	55.2847	scm-1	0.246009	-0.368603	-0.597148	-0.240038	-0.415871	-0.525519	-0.307221	-0.41905	0.00574524	0.0127577	0.00019972	0.00827188	3.34392e-07	3.44857e-06	2.10455e-06	2.65182e-05
WBGene00004776	ser-1	3.5658	4.32071	4.41827	2.24441	2.26852	2.79231	4.59756	3.91023	3.52341	2.10828	3.44958	2.99051	2.1882	2.09289	2.32367	2.5882	2.69601	2.59059	3.54596	3.28725	3.47115	3.20558	2.19809	2.40223	3.75793	3.41441	3.97849	ser-1	-0.753243	-0.0231436	-0.538615	-0.889214	-0.631229	-0.241582	-0.65889	-0.134487	1.93623e-05	7.45103e-05	0.852773	0.932938	0.000750136	0.00276947	0.0745732	0.154659
WBGene00004788	sft-4	146.459	148.059	149.227	118.917	128.448	125.069	152.964	143.692	139.102	105.135	104.299	104.077	106.447	104.586	102.057	110.458	109.028	112.685	125.29	121.549	124.214	108.219	106.54	107.321	136.295	136.23	133.814	sft-4	-0.254455	-0.0263699	-0.501119	-0.502813	-0.417418	-0.257579	-0.46213	-0.126859	8.19394e-09	5.87548e-08	0.40163	0.643876	2.42604e-15	1.37241e-13	6.57372e-09	1.97178e-07
WBGene00004810	skr-4	16.8132	18.0848	17.6471	101.639	100.665	104.23	17.4111	14.7339	13.3211	8.75403	8.09134	8.92612	54.1103	58.0503	55.0888	15.1167	14.5576	14.5703	12.9108	12.5666	12.9178	69.6034	69.4374	63.3772	18.0238	18.0208	17.5233	skr-4	2.54384	-0.209858	-1.02217	1.67056	-0.247033	-0.448455	1.94752	0.0302429	1.74772e-27	5.9515e-25	0.0039736	0.0389929	4.11674e-13	1.55088e-11	6.60375e-07	1.02644e-05
WBGene00004815	skr-9	4.28596	3.51615	4.70844	2.52916	3.21424	2.8391	4.55092	3.50891	4.00836	3.32997	2.46348	2.49654	4.24262	4.40504	4.00017	3.44028	3.41441	3.73553	3.73262	3.21424	3.39665	4.64421	4.54578	4.97205	3.86738	4.56923	4.04217	skr-9	-0.553633	-0.0549796	-0.607811	0.0217863	-0.232563	-0.265677	0.178586	-0.00121735	0.000154268	0.0004915	0.63053	0.810542	7.82797e-05	0.000389537	0.0343468	0.0837312
WBGene00004818	skr-12	4.13339	3.5704	3.66544	2.99187	2.89358	2.43589	4.15585	3.37081	3.52341	2.17851	2.09537	1.69238	3.38851	4.14112	3.85935	4.21355	3.27637	3.28111	3.2346	2.91745	2.94466	4.77585	4.02572	4.84514	3.71284	3.8929	3.55572	skr-12	-0.45275	-0.0464745	-0.95286	-0.00354575	-0.105369	-0.321091	0.251106	-0.0279906	0.00100334	0.00267584	0.681534	0.840222	3.69514e-07	3.75943e-06	0.0122997	0.03604
WBGene00004856	sma-2	4.77157	5.16976	5.24362	5.18937	4.67935	5.32961	5.42853	5.62388	6.06291	3.12004	2.94346	4.13193	3.63463	4.65647	3.8272	6.0396	5.59615	6.03366	4.07742	3.74834	3.84904	4.37227	4.25077	5.34911	6.26495	6.06637	6.59701	sma-2	0.00405309	0.171744	-0.576264	-0.327029	0.220244	-0.373152	-0.135805	0.319684	0.967912	0.976685	0.0856968	0.261793	2.72703e-05	0.000155637	0.00170754	0.00703512
WBGene00004875	smd-1	229.456	237.036	248.368	388.325	373.971	394.361	240.737	208.376	209.298	132.93	143.498	147.285	228.02	226.131	211.28	105.876	103.933	107.017	167.277	166.67	160.955	299.357	303.982	272.54	162.39	160.26	151.77	smd-1	0.694875	-0.119958	-0.753458	-0.102323	-1.17218	-0.529143	0.294489	-0.590516	2.98955e-15	6.03014e-14	0.0164335	0.0946915	3.8962e-15	2.07562e-13	1.20478e-11	6.88269e-10
WBGene00004878	smf-3	6.11547	6.06464	6.30804	77.9869	78.4087	77.0516	6.59539	6.4588	5.6139	1.52979	1.38446	1.31081	84.0133	82.3512	85.0996	2.9888	2.35073	2.88906	3.85381	3.36969	4.0811	79.7641	76.4646	77.3427	6.52334	5.86291	6.89182	smf-3	3.65784	0.0148382	-2.13556	3.76456	-1.17999	-0.709709	3.65856	0.0555196	5.61484e-29	3.38982e-26	0.854209	0.933609	4.35698e-14	1.90599e-12	3.09465e-08	7.71087e-07
WBGene00004890	smp-2	35.882	41.0695	40.7684	8.92668	8.91461	9.24389	36.282	39.9479	41.2861	14.4555	16.9053	17.4488	9.68628	9.43586	9.36045	12.6372	10.2851	11.9171	25.3061	26.7017	26.0276	9.83717	10.5934	12.3287	25.4007	24.5807	24.374	smp-2	-2.12274	-0.0013304	-1.27051	-2.04836	-1.76703	-0.591667	-1.8623	-0.659372	3.39703e-20	1.59449e-18	0.981853	0.99364	1.45677e-16	1.04114e-14	3.84764e-10	1.57819e-08
WBGene00004918	snr-5	59.1477	54.3592	55.8726	50.7735	50.5709	46.9944	59.7789	37.4287	40.1163	37.7529	40.6169	38.797	34.4516	35.2373	32.5171	42.863	40.4891	43.7598	41.9402	38.668	40.6059	37.3077	39.6849	33.4338	44.9812	44.9392	40.5597	snr-5	-0.190785	-0.330579	-0.53109	-0.726611	-0.413846	-0.48033	-0.613117	-0.376994	0.0450687	0.0770837	0.00119595	0.0197622	6.21473e-06	4.35514e-05	2.09878e-05	0.00017617
WBGene00004930	sod-1	167.179	168.352	179.773	167.084	175.207	177.074	182.598	117.991	115.419	107.491	110.714	117.862	124.066	122.665	115.285	111.498	108.639	112.402	122.594	119.955	112.941	117.345	120.964	92.811	126.354	133.541	123.369	sod-1	0.0109333	-0.337987	-0.614781	-0.507896	-0.630307	-0.534268	-0.639769	-0.426245	0.909209	0.932347	0.00158985	0.0229039	1.15671e-06	1.01407e-05	8.63674e-06	8.52725e-05
WBGene00004981	spl-1	110.936	118.887	117.511	90.5585	90.2191	89.4169	113.581	104.108	108.372	80.2439	81.3147	82.2869	81.8729	82.6551	82.136	80.3163	80.7809	82.5766	94.1366	92.5853	91.468	83.2673	81.738	85.1256	98.2543	93.9528	96.8209	spl-1	-0.360727	-0.090572	-0.508663	-0.492304	-0.509353	-0.318531	-0.47331	-0.264055	6.69624e-12	7.8365e-11	0.00748829	0.0577226	2.5722e-15	1.45037e-13	1.06998e-10	4.87728e-09
WBGene00004986	spp-1	50.3521	45.8887	44.5102	46.9471	42.9157	45.3181	46.5143	35.539	35.8867	15.4923	14.1126	13.2601	9.43712	8.07909	8.86771	10.6183	9.18612	12.1878	26.5646	22.4312	26.4553	24.4244	25.2051	27.7829	23.0226	22.1516	24.0714	spp-1	-0.0568571	-0.263112	-1.71852	-2.41535	-2.139	-0.897753	-0.867403	-1.02327	0.456904	0.545476	0.00184655	0.0247758	4.12806e-16	2.63573e-14	2.66874e-11	1.38766e-09
WBGene00004987	spp-2	20.953	19.7144	20.4213	16.3391	16.3211	15.2664	18.397	22.3902	20.7125	4.80033	5.65088	3.99831	6.49496	6.58673	6.81301	3.97743	3.58833	4.36235	8.0366	8.62555	7.47671	11.8314	12.934	11.5017	7.47086	8.05822	7.62266	spp-2	-0.350344	0.00343411	-2.10424	-1.6207	-2.35885	-1.3446	-0.751389	-1.40091	1.81493e-05	7.02022e-05	0.957644	0.982159	7.00591e-18	6.72219e-16	1.26293e-15	1.63682e-13
WBGene00004989	spp-4	42.4867	46.2778	44.1813	2.14971	1.85854	2.12492	50.4105	39.848	43.3994	8.08536	8.8744	8.68979	0.896232	0.993491	1.0047	14.2338	14.5894	14.1136	21.9244	19.2392	20.9049	1.63826	1.87698	1.93829	34.1901	31.7215	31.9618	spp-4	-4.43026	0.00401453	-2.37002	-5.51477	-1.62742	-1.09404	-4.60853	-0.440152	1.65329e-20	8.18024e-19	0.941645	0.975633	3.1194e-21	5.41747e-19	2.68003e-16	3.94441e-14
WBGene00004990	spp-5	429.678	420.356	428.821	120.342	131.521	124.285	452.44	459.012	476.605	196.144	210.716	183.984	81.9853	83.9421	82.813	255.506	255.506	246.506	328.317	312.959	321.249	126.521	122.764	116.974	376.233	386.717	404.837	spp-5	-1.76794	0.117214	-1.11782	-2.36262	-0.756586	-0.409782	-1.80369	-0.132081	1.10909e-27	3.93094e-25	0.0021528	0.0269129	9.36863e-23	2.22884e-20	4.36606e-12	2.69841e-10
WBGene00004993	spp-8	67.7118	71.3978	74.0673	41.478	44.3275	43.4178	81.7936	82.4999	79.7096	32.7041	34.9353	32.6084	15.6137	17.0166	16.4037	34.923	34.7215	32.756	49.0464	48.5134	48.8248	29.4977	27.1103	31.0005	61.3815	63.5584	66.8407	spp-8	-0.723616	0.19698	-1.09004	-2.12258	-1.06039	-0.54108	-1.28952	-0.152214	4.40065e-16	1.03139e-14	2.91635e-05	0.00333212	5.7947e-20	7.98703e-18	3.66414e-13	2.89251e-11
WBGene00004999	spp-14	269.614	270.994	267.702	195.251	189.05	191.037	293.198	217.205	222.382	122.665	130.883	115.822	93.436	90.4664	90.7573	185.165	199.263	194.868	169.021	152.778	158.215	129.307	125.212	118.435	184.125	185.709	184.609	spp-14	-0.48979	-0.153562	-1.1321	-1.55634	-0.479641	-0.750992	-1.11436	-0.543506	2.26846e-08	1.51408e-07	0.0201814	0.107884	3.29052e-16	2.15647e-14	3.41684e-12	2.22248e-10
WBGene00005001	spp-16	13.3112	13.4075	14.3061	9.75925	9.04373	9.72569	13.5134	12.2784	11.614	7.66442	7.19391	6.38522	6.34113	7.87341	7.91202	7.26174	7.64475	7.32778	8.36642	8.3688	9.0502	8.20931	7.77108	8.41121	10.4588	10.292	10.2791	spp-16	-0.522993	-0.132484	-0.95869	-0.899871	-0.883056	-0.671358	-0.753615	-0.402261	5.14754e-08	3.23434e-07	0.0540375	0.197158	1.42384e-12	4.88693e-11	6.60595e-10	2.55513e-08
WBGene00005002	spp-17	103.995	106.063	101.54	188.181	194.372	182.142	101.324	76.6146	80.8511	63.9625	71.8604	63.1129	193.997	198.274	193.275	109.836	106.231	110.936	81.8297	79.1546	73.6315	161.412	153.606	145.687	107.682	109.688	108.039	spp-17	0.857585	-0.276728	-0.650367	0.910443	0.069883	-0.409039	0.564898	0.0630558	9.06645e-15	1.67507e-13	0.000120074	0.0064561	9.51245e-11	2.3073e-09	4.99708e-07	8.14879e-06
WBGene00005040	sra-14	2.62147	1.82559	2.76616	0.100299	0.0866407	0.210348	2.31434	2.97331	2.39888	0.980287	1.35728	0.973362	0.234285	0.204483	0.07642	1.07869	0.973362	1.27082	0.84371	0.826354	1.01645	0.052684	0.052684	0.140385	1.29495	1.13913	1.43306	sra-14	-4.27672	0.0975596	-1.13165	-3.90841	-1.10375	-1.41547	-5.03861	-0.893712	1.17011e-07	6.94032e-07	0.516711	0.730559	1.07648e-05	6.9625e-05	1.06012e-06	1.51407e-05
WBGene00005131	srd-53	0.545169	0.269248	0.447775	1.04124	0.594923	0.684565	0.284702	0.439527	0.412165	0.171705	0.084508	0.0957236	0.513777	0.492108	0.66043	0.236835	0.284702	0.123353	0.292279	0.211465	0.224709	0.413184	0.654265	0.467086	0.253557	0.241803	0.386511	srd-53	0.894548	-0.141783	-1.86129	0.414883	-1.03036	-0.747459	0.300087	-0.5123	0.00467234	0.0106363	0.668335	0.833475	0.00122112	0.00423296	0.0597264	0.129918
WBGene00005291	srh-70	0.700701	0.707884	0.513777	0.236835	0.0866407	0.0899412	0.542482	1.01645	1.04747	0.108754	0.470739	0.28854	0.175358	0.115381	0.07642	0.392683	0.346131	0.334011	0.292279	0.479036	0.298269	0.236835	0.0899412	0.0957236	0.760427	0.671813	0.842509	srh-70	-2.33106	0.381109	-1.36023	-2.44227	-0.838334	-0.886977	-2.30603	0.249768	0.000385926	0.00113349	0.187538	0.419875	0.00475322	0.013825	0.0255348	0.0658444
WBGene00005444	srh-237	2.05706	2.21852	2.49546	1.13025	0.841534	1.18946	2.06512	1.85052	1.98982	1.04991	0.771209	0.814351	1.0212	0.877423	0.814351	0.350966	0.284702	0.479036	1.28401	1.60137	1.20431	0.94589	0.973362	1.3772	1.66905	1.58681	1.46724	srh-237	-1.10777	-0.193406	-1.37964	-1.32172	-2.63304	-0.743093	-1.08085	-0.515907	4.88501e-07	2.58652e-06	0.149518	0.366918	8.61171e-08	1.06372e-06	3.81633e-05	0.000290439
WBGene00005528	sri-16	1.53542	1.37016	1.33114	5.61999	5.22532	6.06161	1.76935	1.56669	1.72157	0.67057	0.594923	0.698364	3.10582	3.5317	4.1931	0.937798	0.507819	0.715287	1.19059	0.708856	1.41213	4.37227	4.41465	5.74391	1.50287	1.27082	1.60826	sri-16	2.0038	0.253095	-1.12383	1.34471	-1.0514	-0.401117	1.76045	0.0382493	6.0334e-12	7.13774e-11	0.193541	0.426991	0.000396279	0.00159125	0.079174	0.161728
WBGene00005552	sri-40	42.2886	41.9137	45.8153	41.8059	43.4336	42.2439	45.457	38.1404	41.5304	17.5924	17.1885	18.1628	38.1031	34.7814	34.9946	23.5783	21.8241	26.402	18.3568	16.6187	16.3908	38.333	39.5515	41.0945	23.887	22.8024	21.3459	sri-40	-0.0281479	-0.0577502	-1.29251	-0.268858	-0.855547	-1.3352	-0.129059	-0.933345	0.626437	0.69959	0.319553	0.566908	4.86346e-17	3.85679e-15	1.74548e-17	3.06199e-15
WBGene00005571	sri-59	0.170646	0.269248	0.151511	0.0778796	0.142487	0.12278	0.12126	0.0866407	0.167091	0.049777	0.112896	0.0450267	0.234285	0.204483	0.133009	0.129589	0.165854	0.178866	0.204483	0.133009	0.0888273	0.167091	0.127199	0.0957236	0.222487	0.209236	0.084508	sri-59	-0.788436	-0.659742	-1.58658	-0.0182941	-0.255927	-0.474461	-0.558172	-0.25267	0.101553	0.155486	0.152899	0.372478	0.00918139	0.024123	0.29257	0.434349
WBGene00005643	srp-2	32.2708	33.6327	31.9618	32.964	35.668	33.2954	36.1308	31.4903	28.0742	21.4061	22.684	22.4978	25.7254	29.36	25.2051	24.2118	22.4039	23.1262	28.5963	25.4644	26.8093	31.6891	31.1474	29.0797	27.7143	28.1139	27.0674	srp-2	0.0577384	-0.0344536	-0.552705	-0.284729	-0.489521	-0.271348	-0.0864282	-0.237759	0.36424	0.453231	0.587871	0.780309	1.00614e-08	1.57138e-07	0.000278839	0.00152908
WBGene00005654	srr-3	0.735531	0.633246	0.754237	0.594923	0.699597	0.423735	0.511421	0.47777	0.44916	0.377175	0.470739	0.377175	0.646365	0.492108	0.458477	0.511421	0.75067	0.567005	0.513777	0.515529	0.698364	0.778434	0.374786	0.829635	0.651577	0.741324	0.559924	srr-3	-0.331124	-0.561233	-0.806002	-0.423253	-0.224942	-0.317012	-0.210953	-0.127366	0.196013	0.271226	0.0400872	0.163095	0.00960143	0.0250938	0.214108	0.345321
WBGene00005685	sru-22	0.341222	0.306282	0.212778	0.0778796	0.0176617	0.0557608	0.178866	0.273059	0.34017	0.0808829	0.0169575	0.0450267	0.0654893	0.0293713	0.07642	0.0176617	0.0162814	0.0927874	0.170646	0.211465	0.052684	0.0169575	0.0899412	0.0180247	0.12278	0.115381	0.084508	sru-22	-2.69693	-0.156155	-2.82591	-2.4284	-3.23336	-1.18114	-3.21899	-1.40381	0.00184144	0.00461875	0.71638	0.860399	0.00183816	0.00604951	0.0365803	0.0880757
WBGene00005726	srv-15	0.877423	0.819985	0.784105	0.160002	0.142487	0.27634	0.913106	0.781823	0.75067	0.545169	0.274186	0.409693	0.314909	0.204483	0.279805	0.392683	0.476665	0.299501	0.513777	0.594923	0.37194	0.236835	0.374786	0.221458	0.616643	0.636929	0.454863	srv-15	-2.1708	-0.0224654	-1.06711	-1.66145	-1.12216	-0.773728	-1.59882	-0.550627	3.86844e-06	1.71231e-05	0.912575	0.962611	0.000651225	0.00244484	0.00425203	0.014997
WBGene00005949	srx-58	0.786693	1.07489	0.819985	0.049777	0.204483	0.178866	0.542482	0.571235	0.869947	0.702891	0.308848	0.409693	0.12278	0.0293713	0.100299	0.511421	0.409693	0.663592	0.513777	0.439527	0.37194	0.167091	0.052684	0.176446	0.724271	0.573975	0.729335	srx-58	-2.97028	-0.469567	-1.00683	-3.73486	-0.769474	-1.01873	-3.03297	-0.397806	2.27281e-05	8.6315e-05	0.101525	0.290659	0.00594444	0.0166619	0.00486201	0.0167763
WBGene00006040	ssp-11	3.02367	3.11141	2.96144	2.90064	3.00455	2.65478	2.74156	1.12004	1.60137	1.65746	1.82806	1.69238	0.999031	0.936158	1.302	1.49143	1.22091	2.06303	1.15771	1.52607	1.98548	1.70285	1.99055	1.81942	1.22091	1.77411	1.15016	ssp-11	-0.0870192	-0.829149	-0.814065	-1.51398	-0.94813	-1.01215	-0.723065	-1.15511	0.622221	0.695911	0.000395317	0.0114044	0.000719869	0.00266737	9.00903e-05	0.000597232
WBGene00006224	str-180	0.279805	0.371314	0.280548	0.0778796	0.0176617	0.0557608	0.12126	0.373631	0.201717	0.108754	0.112896	0.127199	0.0162814	0.0162814	0.0162814	0.0557608	0.165854	0.123353	0.100926	0.174276	0.224709	0.125671	0.052684	0.140385	0.187715	0.049777	0.115381	str-180	-2.82173	-0.549447	-1.39634	-4.23498	-1.51067	-0.9768	-1.67462	-1.58577	0.000661053	0.00183776	0.196038	0.429927	0.0126115	0.0316876	0.0432534	0.101043
WBGene00006381	tac-1	97.9098	99.9693	107.744	101.111	105.178	112.312	104.077	64.0832	68.094	65.2713	70.802	69.2639	68.3783	63.7241	63.785	71.3654	68.19	74.6374	64.8297	72.4833	66.1941	69.504	72.1508	58.7041	74.0892	74.2637	64.9297	tac-1	0.0586951	-0.401433	-0.572077	-0.640161	-0.511024	-0.588515	-0.606716	-0.519181	0.546984	0.630105	0.000369368	0.011022	5.48875e-06	3.92599e-05	3.20724e-06	3.73575e-05
WBGene00006395	taf-11.3	5.20011	6.49496	5.40719	4.43263	4.59165	3.94844	5.88442	3.68362	3.59914	3.32997	3.28111	3.41441	2.89697	3.48216	3.27372	3.03323	3.85831	3.9172	4.07742	3.62511	3.23293	3.6155	3.60338	2.68369	4.51513	4.00524	3.68242	taf-11.3	-0.381516	-0.389912	-0.746229	-0.806915	-0.635028	-0.624219	-0.760197	-0.473361	0.00900942	0.018984	0.00722479	0.0564939	3.55558e-05	0.000196655	0.0001765	0.00104332
WBGene00006493	tag-147	164.206	165.368	161.23	105.48	108.395	106.151	160.184	149.929	150.779	89.4969	89.2276	90.3254	88.6899	86.0361	87.297	101.18	103.538	101.947	117.83	114.982	118.783	103.108	98.6946	96.321	139.874	139.155	136.407	tag-147	-0.617059	-0.0908234	-0.866728	-0.905275	-0.677925	-0.480756	-0.718293	-0.240314	8.93701e-19	3.32353e-17	0.00323982	0.0342662	2.08425e-22	4.64065e-20	4.79389e-16	6.55555e-14
WBGene00006524	tap-1	15.1624	15.8849	15.6164	20.0711	19.1439	18.3218	15.0829	14.8039	14.9146	10.8429	11.4759	10.4428	15.3842	15.7669	14.9146	11.2235	10.552	11.2454	12.9108	11.7448	12.4411	17.0506	15.8566	16.2978	13.2724	12.6254	13.209	tap-1	0.305028	-0.0572781	-0.511427	-0.0164527	-0.498221	-0.327193	0.0776381	-0.25407	8.91382e-07	4.49365e-06	0.267	0.513992	6.32701e-10	1.29044e-08	1.24828e-06	1.73016e-05
WBGene00006538	tbb-4	3.62781	3.64021	4.28379	2.26852	2.5805	2.18712	3.59018	2.97331	3.44834	2.43843	2.77598	2.56394	2.52916	2.69708	2.80782	3.2346	2.92065	3.25111	2.39763	3.2457	2.60753	2.10436	2.55553	2.45068	2.88791	2.99919	2.94995	tbb-4	-0.721353	-0.20961	-0.573042	-0.525708	-0.297061	-0.508637	-0.709244	-0.3841	1.12516e-06	5.54976e-06	0.0498222	0.187272	2.8815e-05	0.000163219	8.29419e-05	0.000558299
WBGene00006541	tbh-1	228.597	220.592	219.09	1.90921	1.74662	1.89832	227.859	231.829	231.093	128.896	129.893	122.764	3.4441	3.40587	3.85935	131.204	126.464	131.175	95.8123	99.9006	97.0461	4.8831	4.41465	4.40374	109.26	104.373	112.286	tbh-1	-6.91392	0.0475487	-0.810017	-5.97211	-0.781921	-1.19198	-5.61005	-1.03716	1.12135e-28	5.90135e-26	0.103783	0.294846	1.24774e-21	2.3617e-19	6.41589e-26	8.57113e-23
WBGene00006545	tbx-8	1.18846	1.22091	1.25903	0.347299	0.401299	0.423735	0.781823	0.842509	1.38094	0.702891	0.240311	0.728255	0.454863	0.573975	0.59979	0.814351	0.782896	0.689154	0.63562	0.785398	0.920663	0.486198	0.591483	0.829635	0.866587	0.949999	1.00664	tbx-8	-1.68997	-0.359029	-1.30204	-1.20491	-0.706931	-0.687865	-1.02463	-0.385648	2.38502e-05	9.03394e-05	0.110465	0.306263	0.000208621	0.000915393	0.00837828	0.026293
WBGene00006585	tni-3	74.2152	70.2558	71.8971	46.2313	51.0922	53.1596	72.2646	68.4071	59.8684	43.2421	47.3334	43.4069	36.2315	35.2963	37.3398	48.3566	46.325	46.9855	55.7066	51.5344	53.8921	38.5316	40.7423	41.4885	55.8802	51.5813	54.579	tni-3	-0.530322	-0.111775	-0.694349	-0.993013	-0.613085	-0.424786	-0.844478	-0.418843	1.44634e-10	1.36366e-09	0.0391694	0.160761	6.12754e-13	2.2263e-11	1.21472e-08	3.37537e-07
WBGene00006603	tps-2	97.2765	99.7263	96.7718	72.7222	75.6411	74.9322	96.577	100.665	102.178	61.1466	66.7892	64.8637	71.0619	68.7924	66.8079	80.3163	78.9736	77.9337	78.4087	76.1797	78.193	68.1516	66.2478	69.706	97.5023	96.9274	99.1287	tps-2	-0.396481	0.0269732	-0.60807	-0.507051	-0.309098	-0.335029	-0.526709	-0.00079681	1.63329e-12	2.10113e-11	0.407697	0.648553	8.23342e-17	6.16335e-15	7.16994e-11	3.3837e-09
WBGene00006610	tre-4	6.73427	7.42341	7.11575	9.911	8.35702	9.03041	6.66322	7.6419	8.2861	5.44692	4.00017	4.91469	8.046	8.5551	8.93477	4.35207	4.87939	4.78279	5.83525	5.30944	5.29401	9.00907	8.95774	9.66957	5.69968	5.42677	5.39299	tre-4	0.365258	0.0802454	-0.57242	0.264192	-0.593752	-0.365151	0.376826	-0.361202	0.000154624	0.000492365	0.358617	0.602561	3.9147e-06	2.93299e-05	0.000578669	0.00285748
WBGene00006621	try-3	2.71785	2.06303	2.35979	3.79151	3.93589	4.11831	2.92188	3.8173	2.83521	1.18946	1.42184	1.77533	3.4888	3.37929	3.10582	1.1191	0.879465	1.21588	2.29954	2.48579	1.84394	5.0491	4.58555	4.58866	1.91274	2.0471	1.66905	try-3	0.722931	0.412967	-0.700195	0.480656	-1.1491	-0.116249	0.990976	-0.342252	5.57725e-06	2.39161e-05	0.00423819	0.0400636	0.000373326	0.00151379	0.431959	0.575206
WBGene00006636	tsp-10	8.8266	8.53766	9.36536	0.819985	0.782896	0.748237	10.9264	9.72863	9.06874	5.86291	6.37623	6.52741	0.754237	0.966785	0.66043	6.19184	4.84812	5.25449	10.5597	8.94081	10.6418	1.08916	1.46864	0.872637	10.3272	10.0857	11.1562	tsp-10	-3.47558	0.152483	-0.506294	-3.46931	-0.728048	0.17405	-2.94757	0.237221	7.40293e-14	1.16667e-12	0.0733451	0.238849	1.01707e-05	6.63787e-05	0.0440532	0.10246
WBGene00006707	ubc-12	40.2602	39.8208	41.7762	47.1562	48.631	50.6711	41.4196	29.0288	29.261	26.0414	30.0687	28.2313	37.3474	35.1009	35.645	32.5831	29.7895	29.7943	28.4765	27.9127	27.591	36.1692	37.966	34.0686	29.9793	30.2544	29.9353	ubc-12	0.263235	-0.305627	-0.532521	-0.173144	-0.40767	-0.535969	-0.169143	-0.434088	0.00112926	0.00296971	0.00043195	0.0118431	3.77467e-07	3.82689e-06	2.76759e-07	5.00848e-06
WBGene00006775	unc-39	1.07869	1.14883	1.37149	0.567005	0.481012	0.45035	1.55997	1.15263	1.19437	0.814351	0.86597	0.781823	1.15263	1.47233	1.302	1.73755	1.12379	1.41337	0.757749	1.02501	0.590267	1.22698	0.87529	0.75067	1.25337	1.13913	1.32506	unc-39	-1.2532	0.118832	-0.543167	0.129761	0.218755	-0.638363	-0.339707	0.0517708	6.0309e-05	0.000208934	0.516162	0.730104	0.0184568	0.0439336	0.0066691	0.0218325
WBGene00006881	vab-15	1.53542	1.49143	1.19181	0.623883	0.401299	0.599235	1.4949	1.40056	1.49143	0.951955	0.833198	0.907391	0.699597	0.702891	0.898	1.37082	1.00566	1.12962	1.13218	1.48494	1.24336	0.486198	0.753274	0.786693	1.80885	1.30085	2.0687	vab-15	-1.4051	0.0627408	-0.651771	-0.896335	-0.289695	-0.143816	-1.11517	0.274532	1.00321e-05	4.09272e-05	0.71675	0.860487	0.00429071	0.0126514	0.431523	0.575022
WBGene00006895	ver-2	2.303	2.25894	2.60703	3.5207	3.62844	3.5658	2.88791	2.51784	2.28615	1.59382	1.72966	1.40626	2.56212	3.45335	3.23818	0.893399	1.22091	1.15628	2.09175	2.26464	1.56565	3.80135	2.89358	3.52341	1.91274	1.80885	2.23764	ver-2	0.580488	0.102809	-0.608152	0.357975	-1.1231	-0.290329	0.499904	-0.272333	0.00013522	0.000435609	0.464746	0.695233	0.00113947	0.00398173	0.0660452	0.14053
WBGene00006897	ver-4	4.66523	6.21947	4.41827	1.67172	1.32867	1.87083	5.01256	7.00531	7.3616	2.53869	3.06777	3.13111	1.8208	1.78631	1.63369	2.15933	2.04643	2.35009	4.18243	4.21585	4.34588	1.70285	1.53418	2.5241	4.17009	3.24764	4.24504	ver-4	-1.6546	0.340202	-0.793432	-1.53391	-1.20812	-0.242696	-1.4611	-0.38309	1.52526e-08	1.04365e-07	0.012605	0.0793158	4.56303e-05	0.00024376	0.0973542	0.190186
WBGene00006925	vit-1	5727.03	5727.03	5727.03	1350.56	1201.77	1267.43	5727.03	6495.16	6495.16	1211.65	1379.55	1322.7	1192.57	1159.64	1211.65	1267.43	1150.72	1184.8	5727.03	5727.03	5727.03	2935.44	2731.74	3099.01	5727.03	5727.03	5727.03	vit-1	-2.17005	0.120444	-2.13641	-2.27032	-2.25667	-2.62104e-05	-0.974489	-3.63607e-06	3.50413e-28	1.4843e-25	0.00634249	0.0518428	6.05989e-28	6.57763e-25	0.999497	0.999785
WBGene00006927	vit-3	2731.74	2731.74	2624.03	258.766	232.278	248.538	2624.03	2731.74	2731.74	193.802	219.546	212.98	134.817	126.492	132.961	222.382	191.443	197.004	1379.55	1409.29	1451.39	591.402	618.58	647.346	1618.16	1569.58	1691.14	vit-3	-3.45194	-0.000213914	-3.6932	-4.36046	-3.73367	-0.932246	-2.12506	-0.72998	4.64011e-34	1.8731e-30	0.995227	0.998216	1.83104e-34	1.64648e-30	8.87781e-21	2.56968e-18
WBGene00006928	vit-4	1654.9	1654.9	1545	138.333	121.864	131.008	1518.5	1896.55	1973.45	240.019	274.474	261.108	78.89	72.1643	79.3308	191.786	168.851	176.298	1295.3	1309.89	1322.7	353.009	402.158	394.361	1285.73	1211.65	1309.89	vit-4	-3.63446	0.140363	-2.64825	-4.40074	-3.18122	-0.305267	-2.08153	-0.351055	6.94457e-28	2.62188e-25	0.025452	0.123539	3.34178e-25	1.41553e-22	2.72805e-05	0.000218938
WBGene00006929	vit-5	7512.28	7512.28	7512.28	931.046	875.119	880.388	7512.28	8744.81	8744.81	1721.66	1781.71	1691.14	825.029	750.453	807.108	2077.75	1802.97	1825.64	6495.16	6495.16	6495.16	2624.03	2624.03	3211	6495.16	6495.16	7512.28	vit-5	-3.07	0.145414	-2.11922	-3.24522	-1.9883	-0.210064	-1.42461	-0.140455	1.21295e-27	4.21307e-25	0.0151697	0.0901925	5.01727e-24	1.70853e-21	0.00102223	0.004604
WBGene00006965	xtr-1	0.973983	1.11114	1.05492	1.22091	1.40723	1.22091	0.714778	0.781823	0.934651	0.918312	0.735531	0.409693	1.43741	1.41709	0.925647	0.469577	0.782896	0.598681	0.699597	0.94589	0.733426	0.94589	1.24411	1.11114	0.479036	0.636929	0.698364	xtr-1	0.294173	-0.382798	-0.711852	0.259632	-0.774983	-0.423484	0.0671416	-0.809937	0.153186	0.220322	0.100754	0.289509	0.00958331	0.0250502	0.0785178	0.160695
WBGene00006980	zig-3	1.64279	1.86386	1.29722	0.376178	0.371314	0.308848	1.11448	1.12004	1.23253	0.883033	0.963501	1.31081	0.26335	0.468998	0.431352	0.893399	1.43259	1.04633	0.902609	0.98921	1.20431	0.486198	0.306282	0.346131	1.50287	0.949999	1.38307	zig-3	-2.15648	-0.453823	-0.590056	-2.06339	-0.502168	-0.628668	-2.07123	-0.335306	9.21752e-07	4.62929e-06	0.0244171	0.120709	0.00819489	0.0218989	0.00455493	0.0159198
WBGene00007067	4R79.2	1.14353	1.29609	1.25903	1.36565	1.60137	1.32981	1.4	1.15263	1.49143	0.883033	0.899233	0.814351	1.29609	1.2246	1.37969	1.37082	0.66043	1.18797	0.97068	1.14768	0.847262	1.33564	1.40626	1.3772	1.39319	1.37149	1.11114	4R79.2	0.21494	0.12148	-0.518062	0.0777965	-0.282752	-0.334423	0.158708	0.0689644	0.22463	0.303899	0.490619	0.713695	0.0185963	0.0441929	0.0950449	0.186788
WBGene00007068	cTel55X.1	22.8444	20.1394	18.8952	26.636	26.4702	29.2827	20.9663	19.0411	17.9335	12.667	13.5483	14.5307	20.3084	21.0407	18.0081	15.6101	15.8884	15.2159	15.067	14.9691	15.2902	21.7126	21.1163	20.0235	16.2116	15.7499	16.9574	cTel55X.1	0.411	-0.0929822	-0.597999	-0.0579449	-0.403479	-0.445838	0.0270349	-0.337761	5.0264e-07	2.65572e-06	0.175006	0.403206	9.11276e-09	1.44361e-07	9.09135e-07	1.34032e-05
WBGene00007072	ugt-1	34.116	36.1476	33.7805	19.1587	19.5161	18.8634	40.4215	41.1639	43.3685	21.7608	22.0022	22.8677	15.0124	15.8973	15.2077	23.536	25.49	26.3145	35.4212	31.1546	30.6439	12.2722	10.9719	13.616	32.7336	28.6517	32.5237	ugt-1	-0.852661	0.264057	-0.639984	-1.17143	-0.460535	-0.0949332	-1.50784	-0.149609	1.0145e-13	1.56612e-12	3.94418e-05	0.00400577	5.08234e-11	1.30763e-09	0.106076	0.203112
WBGene00007115	B0198.2	1.25092	1.86386	1.95317	0.698364	0.423735	0.392683	1.63369	1.59895	2.02585	0.84371	1.11181	1.34248	0.482202	0.826967	0.628795	1.40786	1.18748	1.27082	1.0047	1.14768	1.12898	0.876408	0.833198	0.872637	1.18634	0.917178	0.842509	B0198.2	-1.72804	0.0771724	-0.593676	-1.38083	-0.362392	-0.597314	-0.936958	-0.758495	2.71533e-06	1.24196e-05	0.651393	0.821885	0.00737699	0.0200369	0.00583682	0.0195201
WBGene00007130	B0272.4	9.50663	9.83717	9.78898	23.6228	24.7892	25.3297	10.8886	11.1097	10.3635	5.44692	5.53385	5.67143	8.23832	7.87341	7.50659	4.41827	4.61613	4.03691	6.73317	8.1767	8.58706	14.5835	13.6253	13.2149	7.20659	5.53559	6.63491	B0272.4	1.34014	0.153811	-0.807588	-0.302066	-1.1647	-0.326391	0.510623	-0.599057	8.39328e-18	2.71445e-16	0.050633	0.189187	1.84037e-09	3.41472e-08	0.000440052	0.00225505
WBGene00007152	clec-225	0.545169	0.744512	0.754237	0.403607	0.423735	0.539892	0.781823	0.842509	0.934651	0.311275	0.274186	0.346131	0.623883	0.492108	0.312325	0.312325	0.224709	0.479036	0.59979	0.404605	0.44667	0.342374	0.374786	0.346131	0.543824	0.573975	0.423735	clec-225	-0.569169	0.339475	-1.09693	-0.527422	-1.02538	-0.465799	-0.905126	-0.386424	0.0370588	0.0652076	0.122107	0.326151	0.00146362	0.00496192	0.0791582	0.161715
WBGene00007153	clec-41	83.9421	90.0382	85.6262	73.8108	69.1659	67.1709	83.6815	85.0329	88.3308	39.8797	45.2442	44.4831	38.8542	40.2838	40.8596	41.1361	40.2602	39.193	81.0592	75.2022	82.6427	58.7509	55.9537	60.5462	64.4207	64.0832	69.5239	clec-41	-0.302635	-0.0138203	-1.00204	-1.11281	-1.10694	-0.118338	-0.56815	-0.390606	2.37541e-07	1.3288e-06	0.753128	0.879995	2.12063e-18	2.24567e-16	0.0121335	0.0356372
WBGene00007175	B0395.3	106.18	112.03	110.714	45.1987	44.1469	43.203	111.144	105.267	105.436	58.5489	60.0772	61.4815	39.6272	39.0967	41.8522	66.9484	67.3265	67.032	83.1966	77.9065	79.489	41.3274	45.0564	41.643	91.4352	85.2869	85.9966	B0395.3	-1.30885	-0.0304366	-0.867016	-1.44791	-0.706961	-0.44915	-1.35915	-0.323846	6.10317e-24	5.82384e-22	0.391098	0.633911	1.18104e-19	1.53068e-17	6.37188e-13	4.74938e-11
WBGene00007288	C04A11.5	0.482202	0.306282	0.413184	1.33338	1.12824	0.94589	0.413184	0.47777	0.374786	0.108754	0.174276	0.0957236	0.699597	0.826967	0.973362	0.27634	0.196961	0.151511	0.134253	0.174276	0.155218	0.67057	0.557617	0.75067	0.363901	0.209236	0.423735	C04A11.5	1.52126	0.0842581	-1.72844	1.05361	-1.01303	-1.39026	0.709789	-0.329852	2.42657e-06	1.12289e-05	0.76931	0.890114	0.000568847	0.00217194	0.00165088	0.00685741
WBGene00007315	C04H5.7	14.0527	12.9527	13.9648	2.14971	2.06512	1.59382	14.2556	14.4743	13.6961	9.54239	9.64933	8.66635	4.07087	3.99645	4.17195	11.4816	9.33197	10.759	7.25062	6.0425	7.21725	4.68643	4.05378	5.2138	8.58772	8.51217	8.16842	C04H5.7	-2.82425	0.0502066	-0.562653	-1.7461	-0.38734	-0.998632	-1.57324	-0.698441	2.23103e-17	6.55606e-16	0.463679	0.694442	5.43998e-08	7.11417e-07	1.54598e-12	1.07828e-10
WBGene00007316	nlp-41	1.53542	1.37016	1.33114	1.67172	1.88663	1.53086	1.66622	0.976111	1.19437	0.737968	1.0391	1.02855	0.999031	0.993491	1.15393	1.15628	1.36952	0.94589	1.15771	0.94589	1.09529	1.12065	1.43741	1.41213	1.00788	0.778434	0.766279	nlp-41	0.257665	-0.176491	-0.605583	-0.437801	-0.312682	-0.402403	-0.108582	-0.742728	0.127367	0.188366	0.323009	0.569975	0.00593017	0.0166304	0.0415356	0.0979506
WBGene00007324	C05B5.8	6.321	6.95174	6.41824	12.2412	12.0526	11.3316	7.5155	4.95433	4.86005	4.40504	3.52007	3.78681	7.57177	7.67168	6.97785	4.45391	4.27575	5.25449	4.72385	5.76187	5.06048	7.98707	7.10585	6.3679	5.96287	5.83261	6.16064	C05B5.8	0.858123	-0.202521	-0.749441	0.178976	-0.485856	-0.347605	0.130796	-0.129587	3.76467e-09	2.85382e-08	0.0895789	0.269196	5.62891e-06	4.00973e-05	0.00713929	0.023029
WBGene00007331	pho-11	252.972	262.664	261.108	65.3658	61.5457	63.0138	269.952	242.845	239.359	130.655	133.488	126.314	35.1163	35.2019	36.7597	114.047	107.779	107.744	196.472	185.648	188.065	33.6245	34.7865	34.0686	190.498	193.469	195.039	pho-11	-2.03068	-0.0471204	-0.992697	-2.85938	-1.23827	-0.444975	-2.92148	-0.423381	5.66044e-29	3.38982e-26	0.18091	0.411299	1.20672e-21	2.32856e-19	4.16668e-13	3.23048e-11
WBGene00007338	C05C12.6	1.04747	0.924219	0.992178	0.669264	0.567005	0.656635	1.01645	1.22271	1.04747	0.609498	0.665602	0.59979	0.513777	0.520555	0.542482	0.937798	1.22091	1.27082	0.902609	0.708856	0.812844	0.778434	0.341222	0.346131	1.39319	1.10134	0.942246	C05C12.6	-0.634717	0.143169	-0.651194	-0.896872	0.21456	-0.281048	-1.08573	0.191982	0.00800942	0.0171171	0.440017	0.675367	0.00824918	0.0220236	0.17684	0.299371
WBGene00007341	C05D12.4	5.71483	5.1219	5.24362	0.743452	0.594923	0.748237	5.82563	6.94026	6.36909	2.61322	3.35423	2.99051	0.671813	0.548838	1.03084	1.96773	2.21743	2.56394	4.28108	3.74834	4.70513	0.842509	0.786693	1.07104	3.5596	4.80269	4.75555	C05D12.4	-2.94201	0.245388	-0.850596	-2.8993	-1.24483	-0.339667	-2.59756	-0.308078	2.86715e-11	3.01598e-10	0.0252446	0.122838	7.28701e-07	6.78571e-06	0.0066879	0.0218818
WBGene00007347	C05G5.1	12.8232	13.2173	13.3397	6.84172	6.13384	6.4701	13.4705	14.0704	14.5102	8.97656	8.03086	8.13962	6.87065	5.97087	6.95063	9.67244	9.03166	9.51417	11.7686	10.4816	11.5484	7.48754	8.45043	7.95108	11.843	11.9997	12.3818	C05G5.1	-1.01516	0.0935269	-0.649521	-0.998005	-0.482064	-0.21776	-0.721761	-0.12013	2.37552e-14	4.12969e-13	0.114257	0.312688	1.75699e-10	4.04691e-09	0.00125433	0.00543921
WBGene00007358	lact-6	1.32637	1.32981	1.53179	0.94401	0.972641	1.4085	2.59059	2.85849	2.75383	0.342374	0.374786	0.409693	0.623883	0.59979	0.925647	0.589691	0.782896	0.210348	1.32684	0.98921	1.16429	1.25903	1.79983	1.53418	2.16333	1.62107	1.88892	lact-6	-0.371713	0.979493	-1.92199	-1.01476	-1.67344	-0.265851	0.118722	0.433583	0.108277	0.163997	1.19949e-05	0.00196523	2.39759e-05	0.000139167	0.237882	0.374245
WBGene00007361	oac-3	0.760427	0.67057	0.513777	0.100299	0.234285	0.27634	0.314909	0.404605	0.567005	0.240311	0.240311	0.0957236	0.405182	0.341222	0.312325	0.236835	0.0493084	0.151511	0.481012	0.557617	0.733426	0.125671	0.306282	0.140385	0.363901	0.209236	0.246492	oac-3	-1.86392	-0.652944	-1.93521	-0.886598	-2.50035	-0.157871	-1.9043	-1.30063	0.000400672	0.00116772	0.0564528	0.202985	0.000451694	0.00178016	0.600075	0.721411
WBGene00007362	cyp-35C1	20.7739	20.6886	19.6206	16.3391	16.7081	16.1356	27.3028	31.0776	30.7404	3.21686	3.71284	3.06677	7.67752	7.12029	7.68415	5.20612	6.01579	5.06177	8.3229	8.62555	8.39913	9.59939	7.77108	10.3922	18.4535	17.4146	19.1202	cyp-35C1	-0.313774	0.542738	-2.63297	-1.44911	-1.91874	-1.2747	-1.16249	-0.153541	4.9853e-05	0.000175903	5.26933e-10	1.52521e-06	9.87193e-19	1.09901e-16	1.41802e-15	1.8242e-13
WBGene00007368	C06B8.2	3.46235	3.67364	3.46501	4.49005	3.81059	4.75435	3.75669	3.97528	4.49934	1.55997	1.0391	1.43741	2.31361	2.58179	2.77091	3.85381	4.07273	3.84531	1.57111	2.01088	1.91808	3.53362	4.21585	3.41621	3.59145	3.73262	3.38554	C06B8.2	0.298838	0.199877	-1.4105	-0.473066	0.153459	-0.9659	0.077657	0.0168604	0.008126	0.0173393	0.0681274	0.22762	3.09086e-09	5.45518e-08	1.43825e-07	2.88764e-06
WBGene00007392	fbxa-156	2.303	2.55907	2.99871	11.9346	11.7768	12.4157	3.35966	1.95476	2.75383	1.43259	1.52494	1.72157	8.35702	7.9463	8.66635	1.56801	2.04643	2.02485	2.02485	2.56394	1.91808	10.1476	9.23631	10.3922	2.05958	1.87337	1.92566	fbxa-156	2.21294	0.012351	-0.736441	1.67796	-0.462287	-0.281765	1.92915	-0.414465	2.90772e-16	7.00394e-15	0.932983	0.97155	0.000342166	0.0014035	0.0822963	0.166772
WBGene00007394	C06H5.6	26.2481	27.8308	28.4467	19.6445	20.22	20.3375	26.2002	24.8729	23.7954	13.0368	12.6484	13.3016	14.9889	12.8387	14.2153	17.6503	17.8598	16.8211	18.2993	19.5397	19.5004	16.1736	15.8566	15.7445	22.5238	22.8702	21.1327	C06H5.6	-0.454747	-0.13801	-1.08015	-0.975995	-0.657952	-0.526748	-0.786864	-0.309288	8.73717e-10	7.30917e-09	0.00742906	0.0575214	2.37502e-17	2.01204e-15	4.79684e-11	2.34008e-09
WBGene00007455	ugt-22	107.713	114.021	113.275	34.627	36.5423	34.179	119.042	128.583	126.81	55.1416	57.8775	59.159	24.4911	22.8677	22.8677	28.6452	30.8862	28.9085	102.813	103.388	100.81	34.0384	31.8937	33.2954	88.469	88.7259	92.744	ugt-22	-1.66919	0.160493	-0.958885	-2.25343	-1.92021	-0.124894	-1.75544	-0.310996	4.57061e-26	7.85919e-24	7.89727e-05	0.00531187	1.30524e-20	2.06074e-18	0.00154748	0.00650114
WBGene00007459	C08F11.12	4.38145	5.08114	4.09898	3.03323	3.35423	2.26523	4.50094	1.74784	2.13686	2.14845	2.09537	1.72157	2.10713	2.06656	2.08912	2.46813	3.06777	3.28111	1.83169	1.88424	1.88287	2.6138	1.91661	1.89723	3.22382	2.85797	2.59266	C08F11.12	-0.647273	-0.793519	-1.1796	-1.09656	-0.599616	-1.25745	-1.06458	-0.635093	0.00188972	0.00472893	0.000316551	0.0101592	1.58691e-05	9.77993e-05	6.4957e-06	6.74706e-05
WBGene00007508	C10C5.4	24.0217	22.0347	22.9076	7.8834	8.32344	8.64096	23.996	28.7196	27.9886	11.4974	12.3615	11.2309	6.09221	6.30456	6.60716	11.1847	11.4342	11.6756	16.0839	15.9101	15.0075	9.53867	10.4692	11.3883	18.0672	20.4601	20.108	C10C5.4	-1.48049	0.21988	-0.98059	-1.8662	-1.00881	-0.554911	-1.14832	-0.237406	2.98639e-17	8.58685e-16	0.00074341	0.0153162	7.67737e-14	3.23624e-12	3.10988e-09	1.01521e-07
WBGene00007533	cbl-1	47.5848	47.6301	47.013	8.8928	8.8369	8.86419	46.7851	47.8273	50.9295	21.9974	22.6126	24.746	5.71589	4.76646	5.45626	17.8699	16.9053	15.538	45.7861	48.7402	45.5272	11.3187	11.843	14.326	35.4794	34.3334	37.3826	cbl-1	-2.42741	0.030828	-1.03828	-3.17663	-1.5121	-0.0245757	-1.94831	-0.4103	5.03943e-23	3.92465e-21	0.532832	0.741135	6.61401e-17	5.03796e-15	0.6231	0.740328
WBGene00007536	daf-36	19.2287	17.4111	17.2922	9.44397	8.45729	8.37035	16.3521	17.9047	17.0955	11.1304	11.1711	11.539	6.41146	7.03649	6.83814	10.0198	9.53703	8.70605	14.964	15.4185	14.0966	9.71625	10.0545	8.16362	15.7279	13.6065	14.1819	daf-36	-1.03306	-0.0720458	-0.670321	-1.40899	-0.939527	-0.279207	-0.943474	-0.312609	6.34298e-14	1.01156e-12	0.259356	0.505923	3.35849e-10	7.24558e-09	0.000195949	0.00113852
WBGene00007550	C13C4.6	3.79048	4.22553	3.30239	6.13971	6.44004	6.4701	4.07742	4.87939	5.2138	1.75873	1.82806	2.02224	4.34588	3.45335	3.80292	1.44653	1.12379	1.10134	2.36751	2.26464	2.4346	5.0491	5.64502	6.90261	2.61968	2.52533	2.45463	C13C4.6	0.763586	0.32411	-1.01345	0.0386377	-1.66427	-0.676405	0.624316	-0.56986	8.22128e-08	4.9853e-07	0.00660522	0.0533052	3.73353e-07	3.78961e-06	2.97618e-05	0.000235692
WBGene00007557	C14A4.6	8.48379	9.89963	9.40395	7.43076	6.99727	6.81614	10.0697	9.08593	9.88018	6.4285	7.06727	5.87482	5.77598	6.32663	5.26189	7.97295	7.82674	7.0166	8.25349	8.1053	8.18251	6.70761	5.98147	6.96072	9.20901	8.86934	8.53766	C14A4.6	-0.379703	0.0680123	-0.524557	-0.673552	-0.286738	-0.172593	-0.503627	-0.0557805	4.61439e-05	0.000164016	0.356524	0.600267	7.22135e-07	6.73902e-06	0.031358	0.0778747
WBGene00007558	C14A4.7	3.02367	3.89064	4.41827	3.48944	2.95181	3.5658	2.99257	3.22382	3.3307	2.10828	1.99411	2.02224	2.97331	3.43118	3.59272	2.12492	2.18583	2.39718	3.01479	2.8015	2.87052	3.65193	3.23293	3.31485	3.29741	3.07133	2.55492	C14A4.7	-0.156389	-0.22624	-0.863435	-0.163159	-0.726742	-0.356071	-0.127436	-0.326081	0.192023	0.266534	0.0633964	0.218151	1.63478e-06	1.36737e-05	0.00700936	0.0227323
WBGene00007565	clec-48	39.7787	38.9976	38.3242	6.6373	6.04502	5.79192	38.4516	32.9936	29.99	17.03	18.2704	18.4281	5.45499	4.40504	4.77091	16.1663	18.0331	19.95	27.3601	27.6909	29.0167	6.38265	5.85981	6.06464	29.4276	31.2136	29.7328	clec-48	-2.64912	-0.210394	-1.11937	-2.99236	-1.10499	-0.477715	-2.66394	-0.373019	1.64395e-20	8.15774e-19	0.00176521	0.024082	3.11823e-15	1.71374e-13	3.55377e-08	8.71729e-07
WBGene00007650	ugt-23	33.8861	34.7124	32.751	19.3651	19.8436	18.4339	31.7904	27.9935	30.7404	18.6915	18.7552	19.6793	13.8818	14.7534	12.1758	16.4719	17.7395	18.0789	23.1984	23.514	23.2875	15.5822	13.7504	15.9557	19.9598	19.7728	21.0159	ugt-23	-0.812706	-0.164571	-0.824458	-1.3109	-0.949853	-0.532977	-1.16724	-0.738027	2.66266e-14	4.59666e-13	0.00347923	0.0357326	3.03643e-14	1.39139e-12	1.77116e-10	7.74803e-09
WBGene00007692	C23H4.3	13.6422	13.4937	12.6956	10.2443	11.0238	10.792	13.387	12.4511	10.5645	3.68836	2.98751	2.7406	6.66125	5.69968	5.59012	2.9888	3.8186	3.40534	6.52495	5.59615	6.24223	7.91427	8.4176	8.32236	7.89891	7.6669	7.35331	C23H4.3	-0.314845	-0.130491	-2.09113	-1.1489	-1.95411	-1.11061	-0.690184	-0.795104	0.00030994	0.000927418	0.0875187	0.265459	5.74275e-16	3.61356e-14	1.11881e-12	7.96325e-11
WBGene00007693	C23H4.4	1.70849	2.39888	2.18328	0.94401	0.729335	0.884456	1.55997	1.66905	1.98982	0.883033	0.565771	0.506477	1.1227	0.781823	1.06164	0.469577	0.721714	0.628795	1.57111	1.48494	1.31301	1.15628	0.87529	1.53418	2.05958	1.73368	2.11431	C23H4.4	-1.28913	-0.26251	-1.74129	-1.09548	-1.78963	-0.507099	-0.869896	-0.0743144	2.94499e-06	1.33365e-05	0.114457	0.312783	4.67235e-07	4.59483e-06	0.00705586	0.0228362
WBGene00007739	C26C6.4	0.431352	0.481012	0.413184	0.236835	0.204483	0.178866	0.479036	0.636929	0.484815	0.377175	0.20813	0.163406	0.175358	0.174276	0.312325	0.350966	0.346131	0.240311	0.292279	0.479036	0.298269	0.125671	0.165854	0.176446	0.289881	0.479036	0.423735	C26C6.4	-1.10929	0.272452	-0.945919	-1.08473	-0.542528	-0.367491	-1.55017	-0.179214	0.0036108	0.0084673	0.299556	0.547895	0.00961302	0.0251165	0.218172	0.34999
WBGene00007743	C26C6.9	9.64285	11.0054	10.1687	7.83207	6.36966	8.0595	10.2668	7.38707	8.61519	6.66018	6.47271	6.52741	5.45499	5.86536	5.96535	5.96287	5.65474	6.05891	9.43712	8.01607	8.8928	5.90222	6.10117	7.47604	8.69531	8.35377	9.34641	C26C6.9	-0.468612	-0.237709	-0.644368	-0.831894	-0.798123	-0.218622	-0.676593	-0.220844	4.70159e-05	0.000166732	0.0156268	0.0916631	9.41253e-07	8.4874e-06	0.0264978	0.0678642
WBGene00007748	C26E1.2	4.38145	4.39374	4.74061	6.37802	7.29405	6.96237	6.26952	6.41824	6.66322	3.05401	2.75204	2.99051	6.19184	5.58947	5.96535	3.75996	3.52238	3.86738	4.51221	4.25307	3.47115	6.86551	6.59122	6.3057	5.07465	4.91113	4.875	C26E1.2	0.604354	0.516762	-0.618788	0.391642	-0.277063	-0.146692	0.551331	0.137706	3.91497e-08	2.51168e-07	6.90416e-07	0.000235107	1.56787e-06	1.31925e-05	0.115538	0.216737
WBGene00007765	C27B7.9	20.8251	20.5903	20.7403	31.2136	33.898	30.6722	20.3484	20.667	21.9672	7.79161	7.30146	6.42051	21.4521	20.2249	21.8537	11.2235	12.22	11.8665	12.9827	11.4342	14.1396	24.2546	25.2704	26.9147	19.4521	19.7281	20.8489	C27B7.9	0.621838	0.0162614	-1.54391	0.0291941	-0.815202	-0.69269	0.29346	-0.0516653	8.60736e-12	9.90617e-11	0.785723	0.899456	3.23097e-17	2.62207e-15	4.50748e-11	2.2176e-09
WBGene00007766	C27C7.1	101.775	105.957	108.219	86.0519	86.4104	91.4154	107.017	79.1546	69.6525	64.7669	69.0991	70.7175	70.5401	73.1396	73.4033	74.8197	72.7849	73.7849	70.2193	70.5286	73.1713	71.5434	68.8899	63.6427	74.6536	71.9122	69.2809	C27C7.1	-0.259891	-0.322963	-0.625318	-0.5405	-0.5123	-0.561672	-0.627635	-0.548814	0.00219509	0.00539897	0.000251721	0.00932413	1.76525e-08	2.62027e-07	1.02265e-07	2.16064e-06
WBGene00007810	C29F7.1	5.75237	5.9938	6.23514	1.06164	1.18946	0.915166	6.32663	6.37444	8.1041	3.79681	3.02458	4.03602	0.973362	0.676254	1.0047	2.39615	2.4286	2.06303	5.06914	4.3798	4.18942	1.43741	1.27358	2.01707	4.69854	5.08114	5.43162	C29F7.1	-2.53111	0.19598	-0.735708	-2.81245	-1.40314	-0.397653	-1.99332	-0.243942	4.49311e-12	5.42264e-11	0.0593533	0.208704	2.07372e-06	1.69002e-05	0.00137748	0.0058952
WBGene00007811	C29F7.2	30.7189	28.466	29.6496	29.0416	32.3581	31.3666	33.8131	34.1293	34.2067	16.3858	19.5559	19.2749	15.8199	14.7936	17.0529	17.0529	16.4632	16.9373	20.1898	20.763	21.4959	14.947	14.9106	18.7865	28.5325	26.1781	28.466	C29F7.2	0.0569041	0.200701	-0.691705	-0.906882	-0.820488	-0.512728	-0.892068	-0.097859	0.352707	0.441157	0.00200057	0.0256087	6.96298e-11	1.74245e-09	1.437e-08	3.92396e-07
WBGene00007833	oac-6	7.15392	6.34361	7.05502	2.68755	2.55082	2.34864	6.89182	7.26238	7.67295	1.32637	1.64162	1.46864	1.40626	1.78631	1.37969	1.73755	1.43259	1.65961	3.76066	3.41948	3.43118	2.303	1.87698	2.2947	5.15999	5.22718	4.83062	oac-6	-1.43372	0.081834	-2.2135	-2.16963	-2.09576	-0.950323	-1.67661	-0.434179	8.11654e-14	1.26991e-12	0.270919	0.518485	3.94932e-15	2.09148e-13	4.37737e-11	2.16586e-09
WBGene00007841	C31C9.7	3.20207	3.5704	3.79681	1.90921	2.47288	2.32064	3.87426	3.10907	2.43144	2.64851	2.20731	2.09726	1.76935	1.89124	1.15393	3.8066	4.07273	4.15059	2.24082	2.33053	2.51067	1.88769	1.53418	1.3772	3.1907	3.85883	2.59266	C31C9.7	-0.665665	-0.172951	-0.605602	-1.13819	0.197281	-0.571093	-1.12337	-0.139453	0.000431331	0.00124995	0.250508	0.495448	0.00122793	0.0042498	0.00161533	0.00673876
WBGene00007857	C31H5.6	21.8773	23.4895	20.449	20.0711	19.5161	17.9229	26.6801	32.3045	32.7336	14.2434	13.7151	15.2231	14.3594	13.0181	13.7615	25.5193	26.2158	23.996	24.5448	23.0336	23.6381	20.6298	19.8349	23.0283	29.1172	29.4761	32.5237	C31H5.6	-0.190115	0.474432	-0.604183	-0.676891	0.203497	0.119142	-0.0569596	0.471202	0.0160134	0.0313887	1.41128e-07	6.80827e-05	3.677e-08	5.03219e-07	0.105881	0.202828
WBGene00007866	C32H11.3	1.35523	1.00337	1.60359	2.63532	2.15933	1.98548	0.913106	1.40056	0.826967	0.737968	0.833198	0.59979	1.4832	1.78631	1.9425	0.736668	0.539393	0.628795	1.25092	0.746979	1.0519	1.92001	1.63369	2.18328	1.04747	1.33114	0.662475	C32H11.3	0.788966	-0.343479	-0.8644	0.396526	-1.05183	-0.365755	0.526608	-0.410669	0.000512959	0.00146053	0.157961	0.379433	0.00525267	0.015036	0.143875	0.256853
WBGene00007867	C32H11.4	9.13714	11.7448	10.5263	1.15263	0.814351	1.02501	10.1044	8.40806	10.126	3.17352	3.18438	2.831	0.699597	0.877423	0.751275	2.83414	2.69601	2.61438	9.9069	8.77695	9.0502	1.15628	0.908736	1.11114	7.82612	6.78378	7.26345	C32H11.4	-3.39282	-0.127491	-1.77048	-3.75758	-1.94393	-0.163465	-3.31812	-0.51214	6.6416e-15	1.25375e-13	0.124282	0.329677	3.60266e-14	1.60842e-12	0.0560653	0.12369
WBGene00007891	C33B4.2	0.609498	0.519484	0.346131	0.992178	0.782896	0.748237	0.413184	0.273059	0.231815	0.342374	0.308848	0.0957236	0.482202	0.386511	0.59979	0.236835	0.346131	0.123353	0.170646	0.404605	0.479036	0.842509	1.00664	0.953094	0.324738	0.142487	0.246492	C33B4.2	0.821853	-0.696881	-1.21721	-0.00798337	-1.2011	-0.634839	0.964227	-1.12012	0.0155956	0.0306868	0.0967452	0.281734	0.0159183	0.0387189	0.125287	0.23091
WBGene00007931	C34D1.4	3.98996	3.78681	3.8929	4.25461	5.04298	5.35038	3.59018	3.56787	3.44834	2.17851	1.99411	2.46934	3.56628	3.48216	4.4201	2.35137	2.69601	2.42391	2.79578	2.60208	2.54266	3.6155	4.09605	4.09358	3.07017	2.85797	3.4384	C34D1.4	0.311282	-0.138518	-0.816101	-0.0414071	-0.64575	-0.55588	0.00931968	-0.325329	0.0032713	0.00773804	0.189302	0.422045	4.91988e-07	4.79213e-06	4.15002e-05	0.000312276
WBGene00007937	C34E11.4	0.641366	0.633246	0.479036	1.30578	0.943338	1.15771	0.447775	0.507819	0.869947	0.342374	0.308848	0.19592	0.569914	0.754237	0.66043	0.312325	0.439527	0.381028	0.355563	0.28854	0.18888	0.876408	1.10196	0.996025	0.289881	0.312325	0.246492	C34E11.4	0.96753	-0.0134462	-1.09171	0.182702	-0.617027	-1.094	0.767478	-1.03701	0.000192298	0.000598931	0.957428	0.982159	0.00311032	0.0095622	0.00275996	0.0104656
WBGene00007945	C34F6.11	3.70657	3.64021	3.21039	4.20115	4.41827	3.92401	3.59018	2.5805	2.97331	2.01707	2.09537	2.43714	3.77999	3.37929	3.27372	1.8932	2.15842	2.71647	2.69481	2.60208	2.12851	3.40864	3.29092	3.38103	2.05958	2.73207	3.38554	C34F6.11	0.24926	-0.214959	-0.677126	-0.0149143	-0.628601	-0.503967	-0.061844	-0.394855	0.0609116	0.0997504	0.126846	0.33342	0.000207661	0.000912332	0.00206053	0.00820009
WBGene00007946	ugt-33	2.26852	2.25894	2.15096	2.28615	3.23644	2.40223	2.59059	2.22088	2.83521	0.67057	0.407267	0.439527	0.671813	0.807674	1.18521	0.312325	0.377175	0.598681	1.10134	1.18846	0.980287	0.913106	0.973362	1.25903	1.04747	1.04526	1.15016	ugt-33	0.220814	0.183707	-2.20788	-1.39376	-2.42548	-1.04673	-1.13079	-1.0538	0.128695	0.189974	0.202051	0.437273	5.36127e-08	7.0218e-07	8.48147e-06	8.41701e-05
WBGene00007959	C35C5.10	35.4705	36.3658	37.4341	11.4204	12.1484	11.7496	40.7554	37.1159	37.5881	16.2629	15.579	15.3638	9.40897	9.8207	10.1215	18.0011	16.2213	17.3425	24.2701	23.1633	25.2927	11.4669	9.58855	10.0291	29.0017	28.4988	28.826	C35C5.10	-1.63197	0.079795	-1.21242	-1.89864	-1.08717	-0.586908	-1.81697	-0.339524	9.35721e-22	5.82461e-20	0.0798715	0.251976	3.25236e-19	4.00441e-17	1.04783e-12	7.5197e-11
WBGene00007961	C35D6.4	0.249852	0.371314	0.212778	0.376178	0.312325	0.240311	0.212778	0.273059	0.231815	0.140385	0.112896	0.0957236	0.513777	0.520555	0.542482	0.27634	0.224709	0.151511	0.100926	0.0957236	0.18888	0.309995	0.481012	0.346131	0.253557	0.209236	0.142487	C35D6.4	0.198304	-0.173046	-1.23889	0.97316	-0.375866	-1.14449	0.480797	-0.449142	0.528625	0.612654	0.599411	0.789291	0.00639036	0.0177428	0.00848764	0.026569
WBGene00007963	cyp-25A1	20.119	22.8331	22.2504	0.721714	0.699597	0.366258	21.0615	23.4651	24.6172	2.68297	3.83687	3.29092	0.405182	0.520555	0.279805	1.77937	1.84326	2.20449	11.1382	10.0342	10.9393	0.525336	0.833198	1.18521	12.0526	10.6125	13.9575	cyp-25A1	-5.23148	0.0840127	-2.74239	-5.78507	-3.47508	-1.01517	-4.78722	-0.838915	3.19811e-13	4.57508e-12	0.283099	0.531925	2.95368e-16	1.97295e-14	1.59129e-11	8.74555e-10
WBGene00007973	C36B1.6	3.33144	2.77091	3.49582	5.36136	4.8853	4.75435	2.24376	2.75204	2.39888	2.04643	1.79548	1.66143	3.59914	3.90602	4.57036	1.37082	2.00722	1.81167	2.06007	2.17305	2.24376	4.13193	4.45024	5.2138	2.16333	2.36075	2.69654	C36B1.6	0.648484	-0.37875	-0.811262	0.320491	-0.883581	-0.569283	0.50797	-0.416299	3.81295e-06	1.69143e-05	0.00744811	0.0575662	1.20823e-05	7.68618e-05	0.000348288	0.00184019
WBGene00008016	C38D9.8	0.84371	1.00337	0.652248	0.32204	0.204483	0.210348	0.682401	0.706068	0.525336	0.513777	0.439527	0.476665	0.26335	0.26335	0.374208	0.469577	0.377175	0.507819	0.539892	0.324738	0.44667	0.309995	0.447775	0.346131	0.651577	0.545169	0.386511	C38D9.8	-1.72525	-0.355105	-0.769823	-1.45675	-0.854656	-0.901187	-1.14641	-0.652463	1.79189e-05	6.94328e-05	0.113885	0.312159	0.00519551	0.0148944	0.00170874	0.00703716
WBGene00008038	C40H1.2	2.48579	2.52472	2.18328	1.9849	1.82806	1.89832	2.77467	2.75204	2.21228	0.44407	0.698364	0.663592	1.63986	1.30143	0.814351	0.776628	0.851439	0.876408	1.25092	1.14768	1.01645	1.77533	2.13118	2.64564	1.58681	1.4621	1.07803	C40H1.2	-0.323811	0.108489	-1.98952	-0.967704	-1.49844	-1.0612	-0.163827	-0.807641	0.0560889	0.0928683	0.468057	0.697927	2.2824e-07	2.45592e-06	1.36649e-05	0.000123732
WBGene00008041	ufc-1	30.68	33.2367	31.9618	32.0235	33.2562	31.5513	31.8361	23.0809	24.2515	20.8062	21.6633	21.1327	25.2822	24.9459	24.6405	23.8834	23.9887	23.841	21.0859	20.4248	21.8012	25.0964	24.3309	21.3931	24.2413	25.2743	24.2413	ufc-1	0.016113	-0.285386	-0.588854	-0.353617	-0.415805	-0.595134	-0.430955	-0.37547	0.810772	0.855666	0.000275512	0.0096468	1.03353e-08	1.6098e-07	6.5937e-09	1.97436e-07
WBGene00008068	sdz-6	0.545169	0.559924	0.690435	11.606	12.5419	12.681	0.573975	0.976111	0.786693	0.0808829	0.140385	0.0957236	7.98707	7.59652	7.79516	0.129589	0.165854	0.0468966	0.292279	0.252514	0.224709	14.9947	16.481	13.5303	0.616643	0.412165	0.454863	sdz-6	4.36628	0.353715	-2.54035	3.71428	-2.6103	-1.21682	4.66228	-0.289519	6.24616e-16	1.42358e-14	0.173785	0.401763	7.74002e-05	0.000385713	0.00269493	0.010257
WBGene00008123	ent-4	16.9537	16.7904	15.6859	9.40897	8.45729	9.87853	16.9926	19.638	19.0953	10.0709	12.1985	11.7873	6.90147	7.17414	8.02547	11.2832	9.73156	10.5719	16.3534	16.7323	17.1302	10.3272	10.636	9.30527	20.6454	21.1279	19.8349	ent-4	-0.834577	0.169618	-0.539776	-1.16688	-0.652422	0.02214	-0.703645	0.318439	1.86656e-11	2.02477e-10	0.0145515	0.0875662	6.682e-08	8.49477e-07	0.743418	0.834002
WBGene00008168	C48B4.3	0.913106	0.924219	0.920663	0.646365	0.671813	0.62757	0.646365	0.636929	0.412165	0.737968	0.565771	0.476665	0.646365	0.468998	0.628795	0.62757	0.913106	0.537469	0.699597	0.557617	0.733426	0.707884	0.685773	0.62757	0.439527	0.879465	0.454863	C48B4.3	-0.501116	-0.712676	-0.663234	-0.678503	-0.445848	-0.469059	-0.440711	-0.703497	0.0409393	0.0710567	0.0070406	0.0556297	0.0131374	0.0328143	0.0539752	0.120106
WBGene00008194	C49C3.4	173.876	178.242	173.954	75.9077	76.5898	72.1818	174.64	169.971	171.763	119.352	121.309	120.376	56.1077	57.9282	57.5702	135.165	134.168	125.908	146.36	148.827	153.421	62.1678	62.8404	68.2149	145.274	144.097	145.334	C49C3.4	-1.22761	-0.0265628	-0.543077	-1.61682	-0.41448	-0.230245	-1.44947	-0.275016	2.59256e-25	3.57342e-23	0.39003	0.63311	2.01855e-16	1.40788e-14	3.97834e-08	9.58278e-07
WBGene00008201	C49C3.11	1.77533	1.60309	2.07773	0.298269	0.371314	0.34017	1.11448	1.63246	1.27082	0.951955	1.0391	1.53237	0.865354	0.729335	0.571235	1.44653	1.69414	1.48195	0.539892	0.594923	0.513777	0.273059	0.341222	0.382116	0.479036	0.573975	0.698364	C49C3.11	-2.4242	-0.45063	-0.635996	-1.33087	-0.232585	-1.71545	-2.45127	-1.64343	3.16458e-08	2.06071e-07	0.00929065	0.0657982	0.00128018	0.0044078	1.83869e-07	3.57187e-06
WBGene00008205	sams-1	528.207	551.315	531.414	221.061	217.925	221.4	549.598	484.039	505.822	323.363	347.734	355.766	208.376	204.769	202.28	284.604	280.144	288.232	425.917	424.745	412.771	264.365	266.666	251.103	488.311	484.039	481.17	sams-1	-1.28547	-0.0665156	-0.649223	-1.38718	-0.916365	-0.349775	-1.04085	-0.147632	7.54718e-25	8.97752e-23	0.0580462	0.206237	2.71607e-17	2.24619e-15	5.90913e-11	2.83491e-09
WBGene00008212	C49F5.8	0.641366	0.481012	0.580219	0.210348	0.234285	0.0557608	0.212778	0.47777	0.26335	0.0808829	0.049777	0.127199	0.12278	0.204483	0.133009	0.0176617	0.196961	0.0927874	0.204483	0.252514	0.26335	0.273059	0.127199	0.221458	0.289881	0.412165	0.386511	C49F5.8	-1.94393	-0.897822	-2.7336	-1.87326	-2.8883	-1.22874	-1.49154	-0.646902	0.0010794	0.00285499	0.0272137	0.128822	0.000425698	0.00169101	0.00797332	0.0252595
WBGene00008220	C50B6.7	59.4221	58.0605	57.3788	79.5968	83.7383	84.0345	68.2435	70.0564	71.0739	29.2102	28.6355	30.4598	57.3298	55.8316	58.2355	64.2177	70.1794	65.6859	37.8702	37.4287	36.9017	61.6436	55.3229	61.7078	50.5424	50.1435	50.7155	C50B6.7	0.498696	0.259021	-0.985252	-0.0298532	0.194378	-0.640144	0.0270426	-0.208164	1.71805e-13	2.57664e-12	2.71529e-07	0.000117891	4.75938e-19	5.63222e-17	5.94797e-15	7.07523e-13
WBGene00008310	C54E10.6	2.26852	2.43714	2.15096	2.85265	3.07851	2.8657	2.10713	1.22271	1.76428	1.43259	1.52494	1.12127	2.89697	3.2549	2.83414	1.69529	1.53086	2.17305	1.28401	1.64162	1.59895	2.6138	3.15806	2.36419	1.73471	1.83989	1.88892	C54E10.6	0.360843	-0.462921	-0.768381	0.39458	-0.344867	-0.61603	0.251926	-0.324761	0.0153531	0.0303031	0.00770852	0.0587424	0.000239202	0.00103442	0.00118817	0.00520035
WBGene00008341	ttr-44	52.0589	52.3542	54.76	17.803	16.065	16.6673	54.9408	54.0603	54.2093	10.7794	9.15163	10.4428	7.2828	8.49444	7.20357	7.97295	9.42181	9.92481	22.8702	21.7092	24.5746	12.4034	14.7857	12.88	23.3915	21.4408	22.1565	ttr-44	-1.64767	0.0367366	-2.38211	-2.78208	-2.52743	-1.19959	-1.98318	-1.24603	4.13889e-21	2.29649e-19	0.454535	0.687144	7.11379e-23	1.76493e-20	1.59075e-18	3.28887e-16
WBGene00008342	frpr-5	2.1354	2.0193	2.49546	1.30578	1.22091	1.32981	2.35137	2.18995	2.46692	1.22752	1.42184	1.15263	1.32684	1.12379	1.15393	0.973983	1.15328	1.01361	1.39319	1.33165	1.67381	1.66905	1.60137	1.70285	1.15263	1.37149	1.43306	frpr-5	-0.782851	0.0753198	-0.814674	-0.883751	-1.07911	-0.600453	-0.418916	-0.752456	3.57388e-06	1.59311e-05	0.498631	0.719067	3.29809e-06	2.51771e-05	7.58506e-05	0.000517399
WBGene00008354	gcsh-1	29.99	29.7895	27.5024	5.34595	5.0789	5.15904	28.7808	23.7429	25.7923	18.8688	19.31	19.912	5.71589	5.58947	5.2935	15.6502	15.0561	15.799	26.8512	24.4013	24.8248	7.61206	7.14599	6.68112	23.3099	22.4367	23.4264	gcsh-1	-2.47563	-0.159003	-0.58393	-2.38597	-0.90544	-0.194744	-2.01532	-0.33445	1.15659e-21	7.07271e-20	0.00511306	0.0453284	5.7847e-11	1.47306e-09	0.00102477	0.00461304
WBGene00008358	nspc-18	0.913106	0.67057	0.884456	1.44118	1.55243	1.5609	1.11448	1.04747	0.75067	0.573975	0.698364	0.409693	1.1227	0.936158	1.15393	0.469577	0.567005	0.299501	0.97068	0.907391	0.883744	1.737	1.76428	1.6095	0.866587	1.01361	1.00664	nspc-18	0.882996	0.234313	-0.601904	0.373145	-0.953143	0.168043	1.05785	0.225936	4.67155e-05	0.000165742	0.239997	0.482969	0.0188174	0.0446512	0.40617	0.551176
WBGene00008377	D1054.10	347.734	342.033	353.009	47.9805	44.2491	45.9121	353.431	348.649	363.617	233.78	239.799	230.83	58.1492	58.1866	59.9923	255.976	255.194	255.824	200.926	190.663	195.42	73.3611	75.0666	77.2558	243.887	224.936	238.773	D1054.10	-2.91531	0.0307015	-0.5665	-2.56479	-0.443224	-0.828591	-2.20958	-0.560553	2.72733e-34	1.8731e-30	0.286158	0.534665	9.78939e-18	9.18986e-16	5.12829e-22	2.25131e-19
WBGene00008378	D1054.11	424.745	429.678	423.67	42.8768	40.7684	40.2444	435.081	440.363	420.356	264.365	278.61	265.627	56.5075	58.523	58.2885	318.382	300.573	285.093	216.035	240.277	235.268	68.4071	73.0065	74.5582	269.614	255.506	274.474	D1054.11	-3.36751	0.0201386	-0.661342	-2.88407	-0.503222	-0.88942	-2.56879	-0.677699	1.62417e-32	3.52587e-29	0.575183	0.771605	7.90493e-17	5.94307e-15	4.07351e-20	1.08838e-17
WBGene00008390	D1086.3	61.0326	64.4511	60.8154	106.363	109.357	99.8572	66.5834	72.8859	69.0358	26.0878	24.0802	24.0714	75.8891	69.2979	77.4377	22.6314	23.7034	24.0326	75.9356	71.3856	72.3918	109.418	112.176	120.021	81.1221	81.3342	84.0133	D1086.3	0.761199	0.162955	-1.32859	0.255549	-1.40152	0.240235	0.873212	0.404881	2.01858e-16	4.97259e-15	0.00142515	0.0215489	7.47334e-20	1.00612e-17	1.51365e-05	0.000135224
WBGene00008436	DH11.2	14.1506	11.7448	13.3397	5.22897	5.37949	4.63042	13.0881	13.8505	15.2171	7.04877	6.55318	7.26109	5.37137	5.39183	5.66272	6.37444	5.41918	6.0828	7.79761	9.70842	8.62332	5.98869	5.79464	6.12695	10.903	10.6923	10.6957	DH11.2	-1.36856	0.097372	-0.912868	-1.26091	-1.14425	-0.601727	-1.13725	-0.281788	1.33313e-14	2.41171e-13	0.167408	0.39262	2.0264e-11	5.66034e-10	2.01252e-08	5.27968e-07
WBGene00008451	E01G6.3	9.21471	9.03041	8.67822	0.179976	0.204483	0.151511	7.18806	8.61028	7.3151	1.29495	1.21651	1.24103	0.0654893	0.23574	0.252514	0.776628	0.66043	0.743452	3.08322	3.74834	3.27504	0.342374	0.234285	0.423735	3.37081	3.03438	3.51615	E01G6.3	-5.70916	-0.223942	-2.8591	-5.89501	-3.65593	-1.43169	-4.85258	-1.44967	3.52863e-12	4.30955e-11	0.00837756	0.0616477	3.2102e-15	1.75873e-13	1.1755e-13	1.07447e-11
WBGene00008483	E04D5.4	1.57443	1.49143	1.37149	9.02198	8.1913	8.27403	1.04747	1.56669	1.15931	0.814351	0.500479	0.93904	6.87065	5.97087	5.72086	1.04526	1.12379	1.01361	0.902609	0.594923	0.883744	7.56611	7.73333	7.42896	1.70091	1.13913	1.24967	E04D5.4	2.50677	-0.247621	-0.991954	2.04668	-0.472428	-0.890115	2.34228	-0.137984	2.35593e-15	4.81925e-14	0.19374	0.427153	0.000323847	0.00133974	0.000543557	0.00270253
WBGene00008485	ugt-43	8.48379	8.6091	7.55049	3.14418	3.14175	3.12229	8.55438	9.95131	9.19025	2.47288	1.99411	1.66143	0.671813	0.781823	0.542482	2.0085	2.00722	2.02485	3.88642	3.85426	3.93833	1.01875	1.37149	1.49591	3.94012	3.30405	4.04217	ugt-43	-1.39071	0.168784	-2.0432	-3.64725	-2.03274	-1.07773	-2.70621	-1.13475	3.95499e-13	5.57067e-12	0.036182	0.153133	1.50278e-14	7.24964e-13	1.90192e-11	1.03221e-09
WBGene00008486	ugt-44	49.0655	51.0336	48.757	14.0812	13.2571	14.6353	50.7437	61.0326	62.2719	28.7653	30.9634	27.0823	7.93834	7.26574	8.20931	34.0286	34.5725	33.4982	39.4251	36.1985	35.052	9.22163	9.84098	9.15661	39.2821	40.2235	42.7324	ugt-44	-1.82778	0.218514	-0.782312	-2.67437	-0.543881	-0.42597	-2.39942	-0.284744	5.19917e-20	2.3453e-18	0.00047369	0.0123744	7.60906e-13	2.7303e-11	8.63424e-08	1.85583e-06
WBGene00008493	F01D5.2	1.70849	2.32367	2.2583	0.049777	0.0176617	0.0557608	2.62767	1.74784	1.94926	0.67057	1.0391	0.567005	0.0162814	0.0293713	0.0162814	0.469577	0.253557	0.537469	1.25092	1.4085	1.91808	0.0169575	0.0169575	0.0180247	1.98215	1.69779	1.641	F01D5.2	-5.88392	0.0120101	-1.521	-6.78482	-2.39107	-0.472839	-6.98049	-0.224605	1.59995e-06	7.67577e-06	0.942569	0.975891	4.05645e-06	3.02129e-05	0.0168786	0.0468334
WBGene00008494	F01D5.3	5.83652	5.1219	5.02507	0.049777	0.052684	0.0557608	4.73237	3.16385	3.20933	1.89124	2.16449	2.09726	0.0162814	0.0162814	0.0162814	0.589691	0.819985	0.743452	3.88642	3.16948	3.73262	0.0169575	0.0169575	0.0180247	4.12746	4.21838	3.72006	F01D5.3	-6.52819	-0.541229	-1.3652	-8.19687	-2.85443	-0.560286	-8.10882	-0.404111	6.76908e-09	4.91055e-08	2.71921e-05	0.0032234	2.87584e-10	6.35428e-09	2.31025e-05	0.000189792
WBGene00008499	cyp-37A1	19.3064	20.9893	20.6166	13.0328	11.4944	13.8787	21.673	19.983	19.2161	5.16729	5.3207	6.5568	7.03871	6.72762	6.34234	8.01254	8.76285	8.54055	11.2483	11.0849	11.0077	8.93721	9.37224	8.67579	16.0498	15.9988	15.8849	cyp-37A1	-0.663668	0.00225604	-1.82766	-1.58994	-1.25661	-0.863069	-1.16477	-0.341905	4.47482e-11	4.59576e-10	0.968869	0.986767	1.79873e-18	1.92831e-16	2.69998e-13	2.23289e-11
WBGene00008511	F01G10.9	6.9469	7.39243	7.62393	3.90176	3.81059	4.11831	7.41226	8.13743	9.02798	4.53207	4.97267	5.00637	3.77999	3.08367	3.71384	5.00525	4.61613	4.11932	8.3888	8.06185	6.69605	4.64421	4.47873	4.48652	7.9428	7.44254	7.85773	F01G10.9	-0.895294	0.156113	-0.597754	-1.06525	-0.691622	0.074579	-0.691203	0.0834905	1.4796e-09	1.18964e-08	0.0665236	0.224857	1.10783e-06	9.77626e-06	0.380389	0.52524
WBGene00008522	F02D8.5	5.81353	7.52851	5.96594	1.5772	1.91149	1.8208	6.82962	6.05509	6.26269	3.05401	2.98751	2.49654	1.79548	1.89124	1.43741	4.57961	5.83652	5.08798	3.70478	2.6424	2.6424	1.81817	1.60137	1.78164	5.12694	4.97142	5.04432	F02D8.5	-1.85542	0.00402515	-1.17101	-1.89549	-0.298486	-1.08714	-1.87629	-0.333435	7.79488e-12	9.04904e-11	0.967981	0.986615	2.15784e-09	3.94475e-08	4.14392e-09	1.29438e-07
WBGene00008530	F02E9.5	28.5325	28.7611	29.9864	36.1244	36.8776	36.9189	30.4128	22.8024	23.9792	20.5939	19.7665	20.9337	26.7966	26.2542	25.2427	23.2534	21.5533	23.2019	20.8173	19.9092	20.3551	27.5532	27.2331	25.979	22.0799	23.6808	21.6674	F02E9.5	0.332283	-0.185558	-0.507783	-0.155468	-0.360431	-0.512324	-0.109118	-0.371627	6.24514e-06	2.65117e-05	0.00653066	0.0528422	3.64335e-08	4.99795e-07	2.43494e-08	6.26483e-07
WBGene00008542	scav-6	14.1819	13.3595	13.221	20.1288	18.3542	19.1739	14.0372	16.6552	17.2536	8.81173	10.8512	8.8369	14.7554	15.1476	15.7706	9.84098	10.5816	9.99387	12.1484	13.0228	13.4439	19.1225	19.8829	21.8158	15.2995	15.9425	16.6629	scav-6	0.50177	0.224784	-0.528993	0.161911	-0.423803	-0.0835105	0.570125	0.231373	9.40537e-08	5.66573e-07	0.00417835	0.0398711	6.79346e-07	6.3774e-06	0.280008	0.420983
WBGene00008548	F07A11.5	29.0017	30.7099	30.6034	11.2691	11.7125	10.7703	31.8937	25.8397	25.3816	19.8299	21.4594	20.5152	13.3522	12.0114	13.5808	18.1718	17.7011	18.3479	26.3145	25.8397	24.2064	10.1134	10.4186	10.9358	21.9057	23.2522	21.8815	F07A11.5	-1.419	-0.123133	-0.54648	-1.21616	-0.734547	-0.240362	-1.52314	-0.428409	1.77839e-17	5.28857e-16	0.0449376	0.174906	2.56635e-09	4.62571e-08	0.000423445	0.00218478
WBGene00008553	F07C6.2	1.28464	1.49143	1.19181	0.94401	0.699597	0.748237	0.876408	1.46864	1.38094	0.643159	0.928906	0.753274	0.671813	0.781823	0.689154	0.814351	0.851439	0.909788	0.786693	0.826354	0.698364	0.707884	0.753274	0.872637	0.973362	0.706068	1.07803	F07C6.2	-0.719029	-0.123394	-0.779187	-0.880482	-0.608893	-0.774647	-0.772935	-0.542561	0.00162061	0.0041208	0.483213	0.70902	0.00112998	0.00395333	0.000936658	0.00427965
WBGene00008558	F07H5.7	1.22091	1.70849	0.992178	1.0822	1.18946	1.04747	1.04747	1.25609	1.34248	0.951955	0.594923	0.781823	0.597377	0.729335	0.973362	0.851439	0.626464	0.94589	1.0047	0.708856	0.951955	1.12065	0.654265	0.786693	1.15263	0.979768	0.807674	F07H5.7	-0.197467	-0.0713611	-0.73217	-0.764609	-0.668497	-0.513058	-0.603119	-0.381841	0.353535	0.442001	0.725347	0.864013	0.00631568	0.0175692	0.0325751	0.0803483
WBGene00008560	pho-13	17.0628	16.4037	15.4513	0.721714	0.671813	0.567005	15.7409	17.8383	16.2329	6.81614	6.47271	6.63378	0.754237	0.468998	0.542482	7.18181	7.14131	6.87065	10.7574	11.3243	10.5703	1.05608	1.27358	0.786693	13.5398	14.1626	14.5993	pho-13	-4.61917	0.0251686	-1.29299	-4.79976	-1.20606	-0.583691	-3.95969	-0.209935	2.52556e-17	7.37984e-16	0.659075	0.826795	2.42492e-16	1.65151e-14	4.75127e-10	1.90566e-08
WBGene00008563	F07H5.13	7.15392	6.55928	6.13971	1.92682	1.92566	1.74784	6.55433	5.45026	6.15075	4.17463	4.0427	4.2026	3.13587	3.51615	3.38971	5.4979	4.94263	4.84184	4.28108	4.06546	4.92736	3.27372	3.01479	2.98751	4.2065	4.21838	4.93994	F07H5.13	-1.82531	-0.133375	-0.676016	-0.984895	-0.386548	-0.58488	-1.09678	-0.576443	3.69609e-14	6.2206e-13	0.110761	0.306695	7.36596e-08	9.24979e-07	4.73595e-07	7.81094e-06
WBGene00008565	acox-2	78.4467	84.3265	78.193	16.479	15.7669	16.6253	77.1096	81.6275	81.0177	20.5939	23.7761	21.5478	15.1192	15.5049	16.4939	24.0045	23.6324	23.2522	32.4754	30.1245	31.9454	19.7843	21.5256	21.0329	47.6224	47.0774	47.2132	acox-2	-2.30087	-0.00623083	-1.87245	-2.35634	-1.76559	-1.3472	-1.95128	-0.762244	4.90813e-27	1.25352e-24	0.868096	0.939637	1.4772e-25	7.12628e-23	4.11638e-23	2.64774e-20
WBGene00008566	acox-3	15.024	13.9272	14.1433	1.77256	1.62518	1.74784	12.2412	16.0599	13.903	7.62693	7.13653	8.43337	1.59382	1.83923	1.76998	2.94649	2.63866	2.92311	10.9541	11.2483	10.4197	2.39763	1.91661	1.70285	9.29831	8.94081	9.6597	acox-3	-3.05313	-0.0397802	-0.890895	-3.04181	-2.33684	-0.402587	-2.83114	-0.628308	4.45821e-17	1.25082e-15	0.573305	0.77046	2.82501e-11	7.60412e-10	9.66213e-06	9.33272e-05
WBGene00008567	F08A8.4	24.8069	27.7284	25.912	1.70091	1.85854	1.77411	23.251	28.0379	27.5387	13.127	13.8356	11.7303	1.56274	1.40056	1.4949	6.2276	7.64475	6.87065	25.8119	25.8062	25.6946	1.88769	1.79983	2.13595	19.67	21.8158	21.3459	F08A8.4	-3.89269	0.00382611	-1.02562	-4.15095	-1.91818	-0.0173501	-3.77476	-0.318116	3.71366e-19	1.47249e-17	0.949156	0.978739	2.73768e-14	1.27467e-12	0.775284	0.855423
WBGene00008579	F08G2.8	5.15952	4.58088	4.54641	19.6175	17.6925	16.7163	4.67391	4.43162	4.49934	2.79854	2.53869	2.90064	9.39503	8.26797	8.38139	2.78785	3.32997	2.64805	4.28108	3.66496	3.23293	16.9319	14.9106	11.9122	3.47774	4.07023	3.38554	F08G2.8	1.90598	-0.0697458	-0.780796	0.85635	-0.701883	-0.349935	1.60093	-0.384889	3.98692e-16	9.42052e-15	0.593992	0.785031	3.20591e-05	0.00017943	0.0176686	0.0486755
WBGene00008583	ugt-65	8.74049	9.93218	8.1261	2.12492	1.99883	1.92682	7.58905	9.79592	9.79592	3.90711	4.0427	4.09664	2.99744	2.83802	2.20731	7.32466	7.00594	6.91256	5.98725	5.68929	4.90082	2.78963	2.19809	3.23016	9.1613	8.69648	8.4176	ugt-65	-2.14229	0.0147308	-1.14762	-1.73742	-0.331294	-0.687939	-1.73611	-0.020758	2.27824e-13	3.33329e-12	0.873106	0.94205	3.50398e-10	7.53281e-09	4.79761e-07	7.89016e-06
WBGene00008588	F08G12.5	2.08243	2.06303	1.95317	2.21852	2.83693	2.5241	2.10713	2.15933	1.98982	1.18946	1.66905	1.20791	2.43714	2.10828	2.74156	1.77937	1.87563	1.72157	1.67735	1.68088	1.77411	2.23024	2.46007	1.78164	1.73471	1.52847	1.92566	F08G12.5	0.297908	0.0384841	-0.610799	0.242799	-0.184353	-0.250798	0.0883286	-0.242531	0.0277196	0.0507653	0.773666	0.891886	0.000645599	0.00242634	0.0891135	0.177298
WBGene00008593	clec-227	4.77157	4.84695	4.84579	1.22091	1.15628	1.0047	4.34588	4.67685	4.57144	2.07529	1.45671	1.56801	0.454863	0.312969	0.192078	0.814351	0.693904	0.772963	2.52667	2.6424	2.6424	1.08916	0.87529	1.11114	3.22382	3.14359	3.19621	clec-227	-2.09703	-0.090343	-1.52698	-3.99117	-2.67625	-0.891817	-2.25322	-0.597201	1.16625e-13	1.78295e-12	0.298781	0.547412	2.95923e-12	9.57038e-11	2.58688e-09	8.57373e-08
WBGene00008594	clec-57	7.97295	7.80615	9.15485	3.0765	2.64742	2.62694	7.77436	7.8914	8.53014	2.92438	4.48277	4.24262	1.99152	2.29126	1.9425	5.04432	5.3106	4.57036	5.52212	5.96871	5.48622	2.59266	2.66749	3.02412	6.48269	5.91981	6.59701	clec-57	-1.57222	-0.0440096	-1.11416	-2.00017	-0.744419	-0.55542	-1.59861	-0.391925	7.08643e-13	9.70584e-12	0.612959	0.799734	1.33456e-10	3.14056e-09	3.16243e-06	3.70593e-05
WBGene00008596	clec-54	4.63239	4.6187	5.24362	0.743452	0.917178	0.481012	4.96834	5.71704	5.70818	1.4621	1.79548	1.46864	0.699597	0.414279	0.628795	1.19181	1.72157	1.53769	2.45767	2.6424	2.60753	1.05608	0.939661	0.829635	4.29064	3.8929	3.07979	clec-54	-2.78591	0.174557	-1.61817	-3.08181	-1.69268	-0.909551	-2.34143	-0.371522	3.03273e-11	3.1786e-10	0.105793	0.298506	4.32479e-10	9.11513e-09	2.13025e-07	4.04328e-06
WBGene00008597	clec-55	0.545169	0.59979	0.690435	0.423735	0.312325	0.366258	0.573975	0.439527	0.636929	0.171705	0.112896	0.227103	0.175358	0.0866407	0.374208	0.169382	0.253557	0.210348	0.134253	0.28854	0.052684	0.204483	0.557617	0.513777	0.222487	0.343787	0.386511	clec-55	-0.733783	-0.170285	-1.89593	-1.81548	-1.54694	-2.29877	-0.672858	-0.984483	0.0548272	0.0910049	0.591864	0.783846	0.00110931	0.00388572	0.000367374	0.00192988
WBGene00008598	spin-3	6.34297	5.91981	5.99745	1.79789	1.65219	1.5609	6.26952	6.41824	6.83691	3.73931	4.0427	2.80437	1.37628	1.30143	1.4085	2.23266	2.24855	2.23478	4.78151	5.59615	6.88471	1.88769	1.37149	1.3772	4.57961	4.21838	4.55917	spin-3	-1.87265	0.0922346	-0.820659	-2.17478	-1.45094	-0.107911	-1.99954	-0.455716	5.65358e-12	6.72966e-11	0.348531	0.593483	2.02775e-07	2.21903e-06	0.294051	0.435509
WBGene00008607	F09B12.3	65.6319	69.3126	70.78	22.8289	22.5256	23.4761	69.1249	61.9573	62.208	25.7661	27.9935	30.5404	9.57927	9.75143	10.5029	25.7551	24.8248	21.6768	44.7824	43.6407	43.3685	13.7488	13.5483	14.326	41.5917	41.4352	42.1076	F09B12.3	-1.58003	-0.0894755	-1.28685	-2.7904	-1.51989	-0.640852	-2.30914	-0.716342	9.97712e-22	6.18831e-20	0.0646885	0.220716	8.39077e-20	1.12094e-17	2.4692e-13	2.06116e-11
WBGene00008620	F09C6.10	2.85005	1.89832	2.07773	0.298269	0.312325	0.599235	1.76935	1.46864	1.76428	1.22752	1.07622	1.09046	0.405182	0.548838	0.404605	1.28401	1.87563	2.06303	1.04014	0.557617	0.663592	0.413184	0.654265	0.423735	1.08565	1.01361	1.21588	F09C6.10	-2.51912	-0.438827	-0.981056	-2.27389	-0.36696	-1.56977	-2.14624	-1.02021	1.74752e-07	1.00361e-06	0.0174442	0.0983936	8.18415e-05	0.000404365	1.63886e-06	2.15621e-05
WBGene00008629	cpt-5	43.6177	45.0978	40.7684	21.6592	21.7017	21.6768	45.0138	48.3949	51.5344	14.1396	15.2612	14.8009	10.9841	9.09261	9.55709	12.8485	13.8867	12.5095	41.6277	42.4096	43.0615	23.29	24.0217	24.5836	30.6439	27.6531	30.3491	cpt-5	-0.992804	0.160539	-1.55134	-2.13305	-1.72438	-0.0258419	-0.850127	-0.547525	1.20115e-16	3.05872e-15	0.00240945	0.0287396	3.83663e-20	5.50668e-18	0.605112	0.725408
WBGene00008634	F10A3.4	14.4489	14.8923	15.3638	10.5947	10.1134	11.8852	14.5703	13.149	13.3211	6.17845	5.73986	6.16627	9.27176	10.0589	9.16801	5.00525	4.73237	4.74808	10.6993	10.2876	11.6621	10.7979	9.45682	11.1896	9.5989	9.31642	9.4896	F10A3.4	-0.460316	-0.122892	-1.30633	-0.648792	-1.63081	-0.454418	-0.516438	-0.654201	9.14157e-08	5.52214e-07	0.0520053	0.192247	8.42712e-16	5.02934e-14	1.19718e-07	2.46343e-06
WBGene00008644	F10C2.3	3.49831	4.46212	3.72751	8.79405	9.10795	8.70477	5.73318	5.47748	5.27466	2.32367	2.02927	1.77533	6.01112	6.87337	7.36884	4.92107	4.43162	4.78279	4.00774	3.62511	3.73262	8.28671	7.60544	9.11625	5.57234	5.75493	6.85021	F10C2.3	1.20639	0.514511	-0.942734	0.804089	0.285906	-0.0237926	1.10537	0.647666	1.41418e-12	1.83695e-11	3.49687e-05	0.00381306	4.68518e-07	4.60223e-06	0.836025	0.897901
WBGene00008692	scav-4	16.6629	17.6159	16.2329	1.52494	1.15628	1.302	15.0535	14.3853	14.278	10.9562	10.7992	10.8871	0.781823	0.877423	0.841534	13.5267	13.2461	13.5122	10.0092	9.02439	9.5354	1.05608	0.939661	1.33114	10.7992	10.9427	12.4465	scav-4	-3.66025	-0.205824	-0.627659	-4.33491	-0.324514	-0.81756	-3.95439	-0.565061	6.50473e-20	2.8892e-18	0.00071937	0.0151278	3.34935e-11	8.8671e-10	1.20086e-13	1.09191e-11
WBGene00008707	F11E6.3	149.056	152.502	155.394	51.3823	51.137	51.3243	153.952	110.654	106.282	93.6793	97.7999	108.317	36.4528	34.4564	33.5508	84.4776	83.8913	87.0711	126.209	131.555	124.346	44.7214	49.8044	42.0451	105.692	105.782	97.7768	F11E6.3	-1.568	-0.318059	-0.607534	-2.12569	-0.837143	-0.258181	-1.73843	-0.562902	4.08384e-17	1.15511e-15	0.000228679	0.00889075	1.6298e-08	2.44639e-07	0.00191185	0.00769303
WBGene00008730	F13B12.2	4.17294	4.51098	4.41827	8.23832	8.23832	8.33052	4.24684	5.8894	5.38544	3.02367	3.15256	2.56394	6.14617	6.76435	5.99562	1.92819	1.4621	1.84833	3.73262	3.79568	4.40787	7.35905	8.62746	8.27312	4.09664	3.49058	3.9396	F13B12.2	0.926538	0.232142	-0.597752	0.534208	-1.34439	-0.139103	0.889124	-0.187344	4.47711e-10	3.9409e-09	0.0364258	0.153696	6.62758e-05	0.000336553	0.230097	0.364706
WBGene00008731	F13B12.3	3.96985	4.26394	4.00017	2.05706	1.97857	2.0146	3.96985	4.67685	3.77477	2.50403	2.09537	1.99103	2.49654	2.5531	2.56844	3.28161	3.32997	3.50405	3.92301	3.8261	3.53991	2.72122	2.19809	2.75568	5.73701	6.82085	7.14485	F13B12.3	-1.01269	0.0225268	-0.903203	-0.681671	-0.269012	-0.112871	-0.685746	0.683908	1.05653e-08	7.42863e-08	0.819954	0.916531	8.03418e-08	1.00093e-06	0.276219	0.416765
WBGene00008741	F13D12.6	206.201	225.967	221.884	12.319	12.3853	12.9199	218.546	180.495	166.822	103.68	113.121	110.714	6.34113	5.6805	5.52088	122.183	130.038	121.186	181.327	173.954	178.512	7.40455	8.57337	7.52564	147.285	145.914	140.71	F13D12.6	-4.11548	-0.214097	-0.995913	-5.21367	-0.806747	-0.290504	-4.7909	-0.589855	6.76327e-26	1.10809e-23	0.0005669	0.0135424	2.73901e-16	1.84373e-14	1.481e-05	0.000132785
WBGene00008782	sdz-14	2.33623	1.93159	2.45629	1.1086	1.52738	1.4085	2.49316	2.48479	2.10008	1.43259	1.69779	1.60137	1.90703	1.78631	1.91274	2.23266	2.18583	2.74301	1.32684	1.88424	1.9506	1.70285	1.53418	1.70285	2.16333	1.90751	2.0687	sdz-14	-0.761706	0.076767	-0.509724	-0.263759	0.0948585	-0.419955	-0.45056	-0.132804	5.70919e-05	0.000198621	0.564064	0.763114	0.00262871	0.00828243	0.00802847	0.0253956
WBGene00008793	F14D7.6	10.1955	12.3758	11.6707	9.36297	8.35702	8.54368	11.726	12.1758	12.7529	5.55732	5.35478	4.76192	5.59133	5.52511	5.39818	4.17515	3.94109	3.97528	8.99168	9.02439	8.31756	11.2413	10.9719	11.0284	7.6516	8.7422	8.01254	F14D7.6	-0.371505	0.105111	-1.12815	-1.04394	-1.49898	-0.37068	-0.0337369	-0.481222	1.23584e-05	4.94421e-05	0.11423	0.312688	1.38465e-13	5.67152e-12	1.30538e-05	0.000119131
WBGene00008799	F14E5.1	1.57443	1.89832	1.74784	0.646365	0.594923	0.884456	1.99474	1.92243	1.87428	1.08663	1.0391	1.24103	0.482202	0.651577	0.628795	1.52847	1.32981	1.32981	1.57111	1.06164	1.56565	0.876408	0.833198	0.953094	2.43198	1.80885	2.42501	F14E5.1	-1.31852	0.161078	-0.622847	-1.57543	-0.321124	-0.313243	-0.973679	0.346684	1.15833e-06	5.69398e-06	0.267154	0.513992	0.0014219	0.00483156	0.0589079	0.128476
WBGene00008827	F14H3.8	0.170646	0.204483	0.246492	0.049777	0.0176617	0.0169575	0.378342	0.439527	0.34017	0.049777	0.049777	0.0162814	0.0432314	0.0557608	0.049777	0.236835	0.196961	0.270359	0.231815	0.133009	0.12278	0.052684	0.052684	0.0180247	0.289881	0.513777	0.454863	F14H3.8	-3.03142	0.911331	-2.55811	-2.03299	0.192566	-0.363979	-2.4492	0.9929	7.45764e-05	0.000253756	0.0120384	0.0771481	0.000516168	0.00199873	0.374161	0.5186
WBGene00008829	cyp-35D1	3.5317	4.29126	2.76616	0.594923	0.671813	0.539892	4.50094	4.24504	4.21179	0.171705	0.374786	0.439527	0.092211	0.23574	0.100299	0.204483	0.346131	0.123353	1.22091	1.29495	1.38094	0.486198	0.51895	0.221458	1.77411	1.65808	1.18521	cyp-35D1	-2.51169	0.319778	-3.45764	-4.68214	-4.05246	-1.411	-3.10976	-1.18055	1.38357e-08	9.56928e-08	0.02409	0.119723	5.23437e-08	6.88155e-07	2.61196e-07	4.78501e-06
WBGene00008849	try-10	5.3207	4.32071	5.76559	0.743452	0.537469	0.719389	4.70151	5.42748	5.01033	3.58011	3.15256	2.8657	0.376178	0.676254	0.404605	5.45499	3.58833	4.03691	1.86441	2.52916	2.09175	0.631653	0.51895	0.423735	3.47774	3.33787	3.15256	try-10	-2.9647	-0.0234481	-0.693527	-3.46213	-0.275123	-1.27394	-3.31398	-0.626419	1.28904e-10	1.226e-09	0.841014	0.927791	2.4913e-05	0.000143838	1.05958e-08	2.97762e-07
WBGene00008916	clec-221	1.47233	1.14883	1.53179	0.698364	0.699597	0.864249	0.94589	1.22271	1.23253	0.814351	0.534617	0.567005	0.834263	0.62757	0.689154	1.15628	1.00566	1.12962	0.935404	0.632269	0.626464	0.525336	0.481012	0.669264	0.934651	0.573975	0.454863	clec-221	-0.886652	-0.300434	-1.14521	-0.956565	-0.337833	-0.923306	-1.33687	-1.1415	0.000372652	0.00109767	0.113006	0.310534	7.19324e-05	0.000361892	0.000313089	0.00168446
WBGene00008917	F17C11.6	4.70202	3.85532	4.9873	1.77256	1.79919	1.87083	3.9042	4.43162	4.45881	2.2097	2.16449	2.40449	1.37628	1.2246	1.4085	1.8932	1.8208	1.56849	5.62629	4.75876	4.67586	1.92001	1.95375	1.53418	3.47774	2.76305	2.98751	F17C11.6	-1.30888	-0.0837756	-0.988994	-1.75132	-1.36436	0.158289	-1.30964	-0.556293	3.50915e-10	3.14141e-09	0.408268	0.649183	2.41014e-08	3.45925e-07	0.114977	0.215976
WBGene00008930	F18A11.3	8.18251	8.02302	8.53133	6.91137	7.19391	7.05273	7.64769	6.72197	6.46646	5.32559	5.59133	5.56351	6.81978	6.79266	6.13971	7.03028	7.20659	6.69254	5.86353	5.96871	6.11078	5.92667	6.25459	6.96072	7.47086	6.82085	7.04877	F18A11.3	-0.227282	-0.248548	-0.58633	-0.324097	-0.244108	-0.465004	-0.380452	-0.214648	0.00263585	0.00637559	0.00111196	0.0189839	1.83321e-08	2.70726e-07	5.68063e-07	9.07594e-06
WBGene00008932	F18A11.5	2.02224	2.6262	2.638	3.37129	3.23644	3.21686	2.62767	2.40507	2.46692	1.29495	1.79548	1.96025	3.27753	2.58179	2.65478	1.56801	1.79	1.56849	1.80196	1.88424	1.67381	2.78963	2.83571	2.83693	2.09289	2.2947	2.0687	F18A11.5	0.451312	0.0601273	-0.520603	0.236023	-0.545767	-0.425888	0.234342	-0.155857	0.000637536	0.00177665	0.628904	0.80953	0.00125529	0.00433413	0.00461036	0.0160715
WBGene00008936	papl-1	59.176	58.5489	55.437	14.4555	13.7386	14.7302	51.1651	53.0337	55.8266	14.9299	18.4487	16.4632	11.1323	10.0589	11.2785	23.2534	21.4061	20.0513	33.0958	34.4435	33.6424	15.227	14.1359	16.0146	49.1656	46.8562	49.0391	papl-1	-2.01727	-0.115893	-1.8067	-2.42514	-1.43203	-0.777775	-1.94356	-0.256098	3.53972e-23	2.89973e-21	0.0192851	0.104926	3.11067e-22	6.75288e-20	3.92387e-15	4.76545e-13
WBGene00008953	F19C6.4	8.09353	9.24389	9.25272	3.64146	3.71284	3.24881	9.13477	10.8576	11.2741	6.07305	5.7975	5.0893	3.38851	3.27819	2.94115	5.28979	5.75493	5.17978	7.43506	8.58706	8.67701	3.50405	4.25077	4.3306	7.44254	7.00205	7.69197	F19C6.4	-1.32859	0.231089	-0.656256	-1.47063	-0.712393	-0.110891	-1.15209	-0.261507	2.55647e-12	3.17811e-11	0.00770473	0.0587392	2.23837e-07	2.41152e-06	0.204598	0.334352
WBGene00008957	glb-13	3.07979	2.99371	2.92311	1.38307	1.52738	1.27491	2.52533	3.04271	2.3629	1.82317	1.79548	2.37327	1.56274	1.65086	1.43741	2.09113	1.66024	2.14845	2.12045	2.13485	2.36354	1.25903	1.43741	1.53418	2.20087	2.67443	2.65996	glb-13	-1.10438	-0.184949	-0.58583	-0.947518	-0.617723	-0.444691	-1.09571	-0.261195	4.50146e-08	2.85526e-07	0.11836	0.319236	0.000118918	0.000561972	0.00120754	0.00527318
WBGene00008986	F20G2.2	35.8366	36.122	35.8609	28.835	31.0118	29.3241	36.4826	33.1252	35.2614	23.5336	25.7964	24.4493	26.1702	23.1262	25.4606	24.8341	25.1592	24.0867	28.1398	28.8017	25.7459	25.7254	26.788	27.1519	29.0017	29.1905	30.5807	F20G2.2	-0.276395	-0.0413657	-0.549214	-0.532068	-0.543282	-0.384951	-0.438983	-0.281326	3.83586e-06	1.69986e-05	0.382537	0.626333	1.73817e-11	4.92445e-10	1.51626e-08	4.10169e-07
WBGene00009029	F21H7.3	0.760427	0.965141	0.851439	0.347299	0.142487	0.308848	0.610753	0.87529	0.869947	0.479036	0.439527	0.377175	0.14382	0.174276	0.163406	0.312325	0.693904	0.413184	0.63562	0.515529	0.44667	0.204483	0.341222	0.26335	1.04747	0.343787	0.807674	F21H7.3	-1.74816	-0.14017	-0.987237	-2.39986	-0.899407	-0.675437	-1.67863	-0.36889	0.000485327	0.00138858	0.609182	0.796961	0.00970712	0.0253205	0.0428162	0.100282
WBGene00009047	F22B8.4	3.5658	4.26394	3.72751	1.0822	0.917178	0.748237	4.24684	4.17935	4.39285	1.95912	2.02927	2.15594	1.20064	0.877423	0.898	0.893399	1.08335	1.12962	3.08322	3.28725	3.8929	0.980287	0.654265	1.11114	1.66905	1.90751	2.23764	F22B8.4	-2.06828	0.157382	-0.90146	-1.96383	-1.88136	-0.173902	-2.12391	-0.995104	6.0736e-11	6.09008e-10	0.144196	0.359685	4.36802e-07	4.34227e-06	0.132236	0.240636
WBGene00009059	chw-1	6.8081	8.46345	6.5925	8.84168	8.51697	9.14441	7.22349	5.71704	6.11015	4.53207	5.15904	4.76192	8.29188	6.92862	7.29921	5.15952	5.24945	4.97961	4.81049	5.40507	4.56376	7.91427	6.25459	7.03871	5.24878	5.20433	5.11435	chw-1	0.29222	-0.189848	-0.586973	0.0533464	-0.49528	-0.559114	-0.0374469	-0.476278	0.00317388	0.00753325	0.0587753	0.207698	8.17158e-06	5.50915e-05	1.15875e-05	0.000108014
WBGene00009078	rpb-12	19.4294	18.2575	22.1516	16.1584	17.1486	17.5367	18.7267	13.0408	12.0288	12.9827	12.884	12.3293	15.4138	13.0848	13.6101	16.5993	14.9889	15.1286	13.6276	10.6474	14.3903	15.227	14.4658	10.3922	15.8362	14.3303	12.0477	rpb-12	-0.233628	-0.465032	-0.641936	-0.504328	-0.357732	-0.627999	-0.573632	-0.505211	0.0599629	0.0984286	0.000731394	0.0152121	3.35841e-05	0.000186881	3.62043e-05	0.000278212
WBGene00009085	F23D12.1	0.431352	0.34017	0.447775	0.100299	0.142487	0.178866	0.178866	0.240311	0.299501	0.275204	0.174276	0.0957236	0.12278	0.204483	0.133009	0.204483	0.196961	0.123353	0.170646	0.211465	0.224709	0.125671	0.201717	0.176446	0.0866407	0.115381	0.176446	F23D12.1	-1.61556	-0.815607	-1.3374	-1.45823	-1.29321	-1.04116	-1.33034	-1.78029	0.000408967	0.00118931	0.0182959	0.101581	0.00160778	0.00537691	0.00598071	0.0199284
WBGene00009104	F25C8.1	2.39888	2.77091	2.49546	1.30578	1.57443	1.35584	2.45944	2.71835	2.63866	0.777282	1.00081	1.02855	1.0212	0.853299	0.868797	0.851439	1.15328	1.27082	2.02485	1.96439	2.0618	2.10436	2.62945	2.13595	2.12671	2.11827	1.704	F25C8.1	-0.852382	0.0335227	-1.43446	-1.46754	-1.20462	-0.33044	-0.149233	-0.361354	2.04875e-06	9.57498e-06	0.771112	0.891038	1.18655e-08	1.82684e-07	0.0131387	0.0379903
WBGene00009154	F26D2.16	4.09952	3.78681	3.39592	0.786693	0.671813	0.392683	3.08772	3.68362	2.97331	2.64851	2.20731	2.37327	0.922903	0.468998	0.689154	3.5207	3.7532	3.21686	1.86441	1.4085	1.77411	0.742306	1.10196	0.75067	1.80885	2.15842	2.14845	F26D2.16	-2.6128	-0.210079	-0.639003	-2.47102	-0.107737	-1.14752	-2.10659	-0.879829	6.76755e-10	5.79832e-09	0.103738	0.294815	0.000120546	0.000568892	1.32856e-07	2.6923e-06
WBGene00009156	clec-196	5.61644	4.35359	5.15394	1.5475	1.30022	1.04747	6.0074	4.24504	3.6722	3.05401	3.35423	2.831	1.74398	1.65086	1.82806	3.35966	3.78681	3.81194	2.65996	2.72702	3.19142	2.26852	2.26921	2.5241	3.7986	3.07133	2.92188	clec-196	-1.94229	-0.138557	-0.712237	-1.52517	-0.455178	-0.818603	-1.09544	-0.631474	9.03452e-10	7.53976e-09	0.274392	0.522346	3.80615e-05	0.00020839	5.93905e-06	6.25871e-05
WBGene00009161	F26E4.6	206.015	198.473	217.205	172.393	177.819	178.372	211.453	127.831	119.521	126.354	141.592	132.223	131.555	129.248	124.137	147.666	149.488	140.029	135.278	130.074	141.213	112.229	118.674	97.7226	148.179	143.374	123.749	F26E4.6	-0.233926	-0.482241	-0.636011	-0.690281	-0.508328	-0.61192	-0.918658	-0.584726	0.0387633	0.0677539	0.000135103	0.00680098	4.02924e-06	3.00583e-05	6.49419e-06	6.74706e-05
WBGene00009192	F27E5.1	61.417	62.8281	61.2251	40.0214	39.2986	37.2688	64.2033	54.2345	55.3065	30.2948	29.0365	28.9785	24.6454	25.9372	26.3033	36.5477	37.3874	35.3671	47.8105	47.4224	45.1058	28.5765	28.61	28.8725	44.6855	47.8033	46.9373	F27E5.1	-0.668459	-0.0966679	-1.07085	-1.27093	-0.763541	-0.401749	-1.10754	-0.411654	3.30684e-14	5.62487e-13	0.0384463	0.158931	1.37142e-18	1.50743e-16	1.87422e-09	6.4074e-08
WBGene00009209	F28C6.10	2.26852	2.15096	1.74784	2.32726	1.71902	1.77411	1.86853	1.70849	1.67381	1.35842	1.11181	1.20791	1.79548	1.47233	1.71757	1.19181	1.27895	1.30085	0.729335	0.67057	1.0519	1.63826	1.91661	1.57111	1.50287	1.21233	1.28338	F28C6.10	-0.0736518	-0.2219	-0.736128	-0.304805	-0.690737	-1.33899	-0.252591	-0.619566	0.597785	0.674887	0.124555	0.329949	0.000136528	0.00063232	2.66344e-07	4.85882e-06
WBGene00009213	thn-1	24.083	23.4158	23.6188	0.992178	0.872637	0.915166	42.6977	33.4594	34.2543	0.883033	1.35728	1.02855	0.376178	0.23574	0.431352	3.93833	3.32997	3.16076	4.37655	3.62511	3.23293	1.05608	1.13279	0.829635	13.3894	9.95714	10.2087	thn-1	-4.66162	0.626998	-4.45739	-6.12771	-2.78444	-2.65993	-4.5416	-1.09644	4.11654e-14	6.84134e-13	5.10665e-09	5.2169e-06	3.78077e-14	1.67501e-12	3.25869e-16	4.65643e-14
WBGene00009215	thn-2	174.48	166.006	171.128	166.822	182.598	176.777	211.114	164.496	168.352	6.92635	8.19383	6.9541	20.4941	16.1621	17.1199	10.7992	10.1375	10.1215	51.0075	51.7383	51.3464	139.193	122.931	113.91	74.8995	64.7473	64.8637	thn-2	0.0380682	0.0801308	-4.54085	-3.25695	-4.04552	-1.73166	-0.446307	-1.32641	0.57846	0.658114	0.243846	0.487608	8.27811e-22	1.69136e-19	4.52669e-19	1.03441e-16
WBGene00009226	cyp-37B1	4.47514	4.35359	4.24684	5.78603	6.62827	5.8616	4.21718	5.51522	4.39285	1.75873	1.66905	1.31081	3.05088	3.36021	2.92065	0.814351	1.12379	1.27082	2.15096	2.91745	2.74853	3.40864	3.91765	3.75432	2.46934	2.58381	2.14845	cyp-37B1	0.476738	0.10329	-1.48685	-0.486417	-2.02384	-0.768728	-0.242716	-0.863214	7.75317e-05	0.000262833	0.344527	0.589712	1.42303e-09	2.70984e-08	2.47603e-06	3.02187e-05
WBGene00009237	F28H7.3	119.955	115.977	121.401	35.3265	34.9825	36.4313	115.126	112.051	119.281	73.1713	72.7593	68.0272	28.9743	30.4128	30.9634	97.1214	99.4838	95.1349	103.51	94.7451	97.5023	32.3839	30.8556	34.7296	86.7248	87.1962	95.9328	F28H7.3	-1.7451	-0.0458592	-0.742676	-1.9864	-0.29345	-0.272537	-1.87408	-0.407417	3.4476e-25	4.50184e-23	0.254095	0.499023	9.97954e-17	7.31286e-15	2.24764e-07	4.22454e-06
WBGene00009278	npr-33	0.37194	0.44667	0.447775	0.236835	0.312325	0.423735	0.284702	0.240311	0.412165	0.275204	0.20813	0.19592	0.345064	0.443556	0.312325	0.27634	0.224709	0.270359	0.44916	0.439527	0.26335	0.273059	0.306282	0.589117	0.222487	0.312325	0.347299	npr-33	-0.440136	-0.484406	-0.932019	-0.204417	-0.729544	-0.166249	-0.238327	-0.546973	0.164647	0.234111	0.126694	0.333191	0.0137187	0.0339971	0.576193	0.701932
WBGene00009293	F31D4.8	9.87581	9.48036	9.82678	2.09849	1.82806	1.79789	9.67244	7.79161	6.66322	5.75364	6.42154	6.63378	1.93783	1.44118	1.57111	7.26174	7.20659	7.40977	4.28108	4.53326	4.01243	1.98322	1.76428	1.70285	5.12694	5.56351	5.20612	F31D4.8	-2.33045	-0.282925	-0.630142	-2.55371	-0.413227	-1.18318	-2.40011	-0.873299	5.8414e-15	1.11726e-13	0.00219822	0.0271358	2.24137e-07	2.41326e-06	6.35932e-12	3.79527e-10
WBGene00009295	fbxa-180	3.42771	3.36469	3.97178	0.917178	0.898	1.13279	3.72006	3.91023	3.97304	2.50403	2.72359	2.24082	0.646365	0.729335	0.868797	2.78785	2.78854	2.82535	2.69481	3.0902	2.78963	1.3772	1.04124	1.41213	4.24135	4.15865	4.34588	fbxa-180	-1.89631	0.110053	-0.539397	-2.29804	-0.356703	-0.335625	-1.52702	0.24782	2.92789e-12	3.59863e-11	0.238798	0.481952	2.64892e-05	0.000151978	0.00239078	0.00929081
WBGene00009296	F31E9.3	1.53542	1.52793	1.53179	1.41462	1.24867	1.35584	1.70041	1.40056	1.67381	0.702891	0.698364	0.93904	1.26738	1.83923	1.12626	1.19181	0.879465	1.01361	1.51896	1.37257	1.35115	1.46864	1.43741	1.22091	1.35842	1.27082	1.60826	F31E9.3	-0.188806	0.0473123	-0.966237	-0.137935	-0.593333	-0.110226	-0.146336	-0.125994	0.246645	0.328741	0.755158	0.880749	6.00582e-05	0.000309505	0.489401	0.627449
WBGene00009343	F32H2.6	0.580219	0.67057	0.513777	0.0778796	0.0866407	0.240311	0.447775	0.404605	0.412165	0.204483	0.274186	0.346131	0.345064	0.26335	0.458477	0.312325	0.476665	0.270359	0.539892	0.211465	0.44667	0.309995	0.374786	0.306282	0.513777	0.241803	0.347299	F32H2.6	-2.32705	-0.46601	-1.09974	-0.760101	-0.765316	-0.614397	-0.815693	-0.734192	9.98693e-05	0.000330431	0.135216	0.346255	0.00656127	0.018142	0.0675636	0.143217
WBGene00009354	F33A8.6	3.66831	4.15302	4.24684	3.4069	2.78785	3.18349	3.87426	3.4441	3.40989	2.47288	3.02458	2.92438	2.85137	2.5531	2.68494	3.67767	3.3636	2.85607	2.98751	3.36969	2.91936	2.75568	2.73422	2.98751	3.52134	3.45335	3.27372	F33A8.6	-0.357842	-0.164344	-0.518283	-0.57512	-0.302573	-0.382134	-0.51245	-0.230339	0.0017995	0.00452729	0.106205	0.299231	6.10703e-05	0.000314068	0.00103324	0.00464234
WBGene00009361	F33E2.5	10.4262	10.8429	11.2076	5.64142	5.65602	6.61198	11.4439	10.6336	10.6092	6.81614	7.46453	7.70446	7.34814	6.72762	5.66272	10.1498	9.86628	10.4304	8.67701	8.47553	7.98212	6.92143	6.70522	6.09627	9.1613	9.20685	9.01196	F33E2.5	-0.862161	0.0112715	-0.558547	-0.717869	-0.0904874	-0.366238	-0.711508	-0.243914	2.12752e-11	2.28926e-10	0.868837	0.939769	6.5176e-08	8.34128e-07	2.53955e-05	0.000205711
WBGene00009375	F34D10.6	6.91482	6.21947	6.63145	3.09893	3.3194	3.09512	6.99486	7.47897	7.99551	4.17463	3.77174	4.71573	3.59914	3.64807	4.51629	6.41938	7.00594	6.29116	5.62629	5.0448	5.33444	3.87929	3.9854	4.25192	8.75587	9.07552	9.21471	F34D10.6	-1.05899	0.178393	-0.644077	-0.764335	-0.0065786	-0.303215	-0.712876	0.450516	3.24887e-11	3.39285e-10	0.0279898	0.131095	1.4597e-07	1.67663e-06	0.00123244	0.00536303
WBGene00009429	F35E12.5	75.2669	74.7343	73.0937	11.305	13.6628	12.7321	79.4164	81.9853	82.7935	28.1858	30.9059	30.5895	14.813	14.8208	15.6977	29.9406	36.9409	32.3665	58.9472	59.4295	59.1704	12.3317	13.2353	13.0735	49.2789	51.0723	53.396	F35E12.5	-2.57621	0.129781	-1.31535	-2.30158	-1.16972	-0.329704	-2.53192	-0.53822	4.03461e-25	5.15214e-23	0.00676884	0.0541227	1.98975e-20	2.97897e-18	9.91697e-08	2.10548e-06
WBGene00009430	F35E12.6	64.5966	62.664	64.6164	34.3801	32.4921	32.1898	72.1643	65.7113	72.2646	37.4394	37.0625	34.7762	22.0666	21.207	20.5171	36.0789	40.201	38.0214	47.7409	49.7755	53.7058	25.4606	29.5756	26.2158	54.0112	51.0723	52.2184	F35E12.6	-0.952131	0.128664	-0.81438	-1.58772	-0.745967	-0.346839	-1.2399	-0.287346	4.6237e-17	1.29099e-15	0.00931188	0.0658735	2.06204e-15	1.18581e-13	8.49043e-08	1.83172e-06
WBGene00009488	oac-20	8.57337	7.59724	8.26541	1.88769	1.55243	1.38094	10.0697	9.95131	9.60636	2.01707	1.86386	1.49883	0.646365	0.492108	0.404605	1.23973	1.27895	1.01361	5.95491	6.49496	6.55204	1.33564	1.49815	2.01707	5.10713	7.59724	5.98869	oac-20	-2.3478	0.277718	-2.21175	-4.01917	-2.81738	-0.370113	-2.38327	-0.40562	4.02643e-13	5.6621e-12	0.00484944	0.0437735	8.93151e-13	3.18508e-11	0.00107687	0.00479909
WBGene00009494	hrg-5	0.140385	0.0933673	0.12278	1.67172	1.74662	2.12492	0.248825	0.146522	0.374786	0.0169575	0.0169575	0.0957236	0.204483	0.312969	0.341797	0.0176617	0.0682193	0.0468966	0.0488441	0.0957236	0.052684	0.486198	0.306282	0.423735	0.187715	0.084508	0.084508	hrg-5	3.98422	1.00934	-1.99109	1.25135	-1.60947	-0.943755	1.76231	-0.099022	2.81202e-08	1.84706e-07	0.0472114	0.180841	0.012606	0.0316784	0.143842	0.256841
WBGene00009495	hrg-6	2.16449	1.74784	1.85052	0.786693	0.671813	0.780507	2.15096	1.32981	1.91379	0.67057	0.833198	0.663592	0.482202	0.826967	0.59979	0.736668	0.782896	0.479036	1.32684	1.25552	1.41213	0.778434	0.721714	0.669264	1.15263	0.979768	1.4995	hrg-6	-1.36763	-0.129068	-1.42825	-1.62951	-1.58767	-0.531001	-1.41097	-0.69561	2.5473e-06	1.17313e-05	0.426889	0.664496	2.89896e-06	2.24961e-05	0.00611579	0.0202794
WBGene00009510	F37D6.4	0.431352	0.306282	0.479036	0.100299	0.052684	0.0557608	0.346131	0.341222	0.374786	0.0808829	0.341222	0.227103	0.0654893	0.312969	0.163406	0.236835	0.253557	0.270359	0.292279	0.252514	0.513777	0.125671	0.165854	0.176446	0.289881	0.343787	0.386511	F37D6.4	-2.54458	-0.183137	-1.10013	-1.40618	-0.651344	-0.254007	-1.3713	-0.248473	0.000481238	0.00137938	0.603449	0.791975	0.0204482	0.0479378	0.484889	0.623506
WBGene00009512	F37H8.3	10.2826	8.88941	9.52824	25.7964	25.3241	24.4451	9.73217	8.40806	8.78087	5.25823	5.76559	6.59015	10.8886	12.1484	14.2607	11.0899	10.9238	9.9566	8.36642	7.52277	8.02302	11.0296	10.4692	12.2722	13.8298	14.5251	14.2387	F37H8.3	1.39661	-0.0952926	-0.70574	0.363493	0.148227	-0.262111	0.223982	0.568376	6.24722e-17	1.70056e-15	0.287205	0.536045	1.63046e-07	1.83991e-06	0.00781244	0.0248314
WBGene00009515	clec-170	11.5366	11.4385	10.4348	19.8024	20.7219	20.7269	12.4356	11.8719	11.1966	5.32559	4.88861	6.03716	14.2338	14.0646	13.9442	7.32466	7.99425	6.96688	11.7985	10.9113	11.4342	16.2551	16.9926	17.7936	11.1471	11.5521	12.0169	clec-170	0.873355	0.0899201	-1.03707	0.339795	-0.585815	0.0346496	0.608689	0.0555785	7.6237e-15	1.42827e-13	0.165213	0.39011	3.55862e-13	1.35532e-11	0.593931	0.716953
WBGene00009518	clec-166	18.5728	20.027	18.8952	7.39429	7.61032	6.96237	16.2978	20.0595	19.2161	5.32559	5.65088	4.60991	10.6527	10.2029	10.8834	4.92107	4.79597	5.12014	10.062	11.8719	10.53	9.22163	9.10435	9.73217	11.1471	11.2122	12.4157	clec-166	-1.3917	-0.0543132	-1.901	-0.859659	-1.9599	-0.834562	-1.04131	-0.728066	3.87259e-16	9.18787e-15	0.396047	0.638344	1.08046e-17	1.00344e-15	4.17255e-12	2.62553e-10
WBGene00009520	clec-168	0.609498	0.884456	0.851439	3.57165	3.14175	3.45266	0.479036	0.814351	0.59979	0.311275	0.407267	0.439527	1.09473	0.936158	1.18521	2.46813	1.75499	2.14845	0.292279	0.28854	0.37194	3.68122	4.25077	3.6722	1.15263	1.13913	1.53769	clec-168	2.15768	-0.313666	-1.00325	0.476561	1.45426	-1.29087	2.34784	0.724768	2.57625e-11	2.73985e-10	0.204739	0.440716	0.00269292	0.00844948	0.000434134	0.00222999
WBGene00009522	F38A1.9	2.05706	2.15096	2.04776	1.04124	1.24867	1.07869	1.70041	2.61438	2.63866	0.377175	0.534617	0.28854	0.699597	0.807674	0.628795	0.427577	0.439527	0.334011	1.13218	1.68088	0.812844	1.50609	1.40626	1.93829	1.70091	1.73368	1.85052	F38A1.9	-0.917248	0.118151	-2.49708	-1.57799	-2.45356	-0.876066	-0.406934	-0.246745	0.000111422	0.000364901	0.460085	0.691442	2.04663e-07	2.23546e-06	0.000170012	0.00101116
WBGene00009523	clec-165	2.19904	2.55907	2.70293	1.88769	1.71902	1.50016	2.39336	2.82636	3.44834	0.311275	0.665602	0.439527	0.807674	0.702891	0.721714	0.392683	0.224709	0.356884	1.22091	2.01088	1.31301	1.85114	1.95375	2.09289	2.23362	1.62107	2.17676	clec-165	-0.542365	0.201947	-2.50114	-1.75807	-3.03224	-0.772101	-0.34405	-0.318421	0.00386727	0.008991	0.176926	0.406199	7.76151e-08	9.69045e-07	0.000227762	0.00129309
WBGene00009528	F38A6.4	1.32637	1.25609	1.49699	1.30578	1.85854	1.89832	1.26641	0.87529	1.00566	1.04991	0.86597	0.973362	1.40626	1.47233	1.5475	0.814351	1.32981	0.819985	1.04014	1.22091	0.951955	1.25903	1.24411	1.33114	1.22091	1.01361	1.18521	F38A6.4	0.275508	-0.390456	-0.504955	0.116983	-0.496667	-0.359093	-0.0948367	-0.260909	0.102129	0.156244	0.0425783	0.169251	0.0159525	0.0387871	0.0629198	0.135389
WBGene00009546	fbxb-3	1.16041	1.22091	1.25903	0.567005	0.312325	0.308848	1.36511	1.40056	1.08916	0.84371	0.801822	0.59979	0.646365	0.702891	0.66043	0.973983	0.721714	0.97925	0.571235	0.67057	1.09529	1.08916	0.786693	0.513777	0.795519	1.27082	0.698364	fbxb-3	-1.62308	0.0843587	-0.713246	-0.844442	-0.453689	-0.699258	-0.626719	-0.432503	6.73957e-05	0.000231179	0.685903	0.8426	0.0103291	0.0266704	0.00975659	0.0297895
WBGene00009582	F40F9.5	14.7554	15.3638	16.0146	11.4816	10.6589	10.5046	14.4853	16.9985	16.0955	9.47748	9.19439	8.50146	9.92985	10.3476	10.4606	11.2832	11.8118	10.8419	12.7435	12.4575	11.0778	11.2413	11.8808	10.2826	13.5025	13.3936	13.2541	F40F9.5	-0.494434	0.0423482	-0.765484	-0.584393	-0.442748	-0.345421	-0.460179	-0.19845	4.27212e-08	2.72171e-07	0.490665	0.713695	2.12546e-11	5.85352e-10	1.15931e-05	0.000108014
WBGene00009620	fip-5	5.28979	4.51098	5.37469	5.53338	5.72449	6.16627	5.40131	3.75545	3.44834	2.79854	2.50266	2.15594	1.43741	1.47233	1.12626	2.78785	3.623	3.13703	3.27504	3.47056	3.84904	1.46864	1.99055	2.09289	4.73473	4.1134	3.90003	fip-5	0.194433	-0.286744	-1.03857	-1.90829	-0.666296	-0.524154	-1.47402	-0.255379	0.108166	0.163892	0.0305923	0.138663	3.92095e-07	3.95672e-06	0.000546023	0.00271402
WBGene00009622	F41E7.6	0.816639	0.781823	0.722322	0.376178	0.423735	0.656635	0.610753	0.781823	0.44916	0.377175	0.439527	0.439527	0.623883	0.520555	0.484815	0.776628	0.594923	0.663592	0.935404	0.632269	0.626464	0.413184	0.786693	0.589117	0.651577	0.573975	0.842509	F41E7.6	-0.729062	-0.353182	-0.881649	-0.512322	-0.208365	-0.0856128	-0.420866	-0.188507	0.0108168	0.0223397	0.151968	0.371111	0.00485305	0.0140625	0.71207	0.81009
WBGene00009635	F42F12.3	12.2722	11.0778	11.6707	7.80552	6.86376	8.13539	10.7903	10.5453	10.5147	6.54207	7.09759	7.17757	8.45729	7.56357	8.41477	7.62393	7.55769	7.93834	9.35794	8.74049	8.28671	8.47426	7.96828	7.62266	8.79078	8.57936	8.51217	F42F12.3	-0.619934	-0.137273	-0.748109	-0.522518	-0.596757	-0.406722	-0.537621	-0.436289	6.63659e-10	5.69736e-09	0.0336856	0.146584	3.17341e-11	8.4399e-10	9.58679e-07	1.39325e-05
WBGene00009636	F42F12.4	12.7766	13.0568	12.1147	10.7363	10.2248	11.6621	12.5563	9.42351	8.61519	7.14485	7.13653	6.00548	8.37965	8.52599	8.25349	7.07857	6.74247	7.30146	7.50659	6.82519	7.79761	8.36642	8.87803	7.84073	9.25272	9.37092	8.4467	F42F12.4	-0.219097	-0.321035	-0.910045	-0.589671	-0.841614	-0.774169	-0.590806	-0.485523	0.0166422	0.0325039	0.000924819	0.0171595	9.1942e-10	1.80221e-08	9.20407e-09	2.63774e-07
WBGene00009638	nspc-14	8.4377	8.02302	8.32344	7.55955	7.99425	8.18251	8.03086	6.33371	6.0193	6.00416	5.87482	5.52212	7.17414	7.32338	7.16621	6.07305	6.58294	6.46006	7.57936	5.91981	7.76506	8.14181	6.63491	7.28857	7.86252	7.59724	7.55893	nspc-14	-0.0664197	-0.288379	-0.512213	-0.193985	-0.371089	-0.223402	-0.172158	-0.107401	0.457193	0.545709	0.00355924	0.0363181	1.41436e-05	8.84525e-05	0.0203781	0.0546405
WBGene00009642	F42G4.5	9.16801	9.43775	8.75054	3.4069	3.56435	3.67409	9.04182	8.20227	8.94441	5.75364	6.07967	7.0867	2.65478	3.01633	2.20731	4.6418	4.57835	4.36235	8.17317	8.2861	8.35377	3.50405	3.52341	3.02412	6.3679	7.39931	6.63491	F42G4.5	-1.35944	-0.0634918	-0.52813	-1.79222	-1.00909	-0.139322	-1.4327	-0.422492	4.96953e-14	8.12673e-13	0.386403	0.62987	4.55171e-07	4.48891e-06	0.0698617	0.147119
WBGene00009663	hda-5	8.18251	9.43775	9.30044	13.9491	13.8456	13.4987	9.13477	6.56749	7.18181	3.79681	4.07501	4.60991	9.83547	10.0104	9.78522	3.93833	2.72942	3.37392	5.81353	5.68929	5.44403	10.9696	11.0472	10.8419	5.91917	5.86291	6.51983	hda-5	0.624714	-0.239828	-1.10235	0.145375	-1.44561	-0.660917	0.294786	-0.553274	2.26039e-08	1.50928e-07	0.0128605	0.0805441	2.05156e-10	4.65137e-09	3.38917e-07	5.93869e-06
WBGene00009677	F44A6.5	2.75897	2.6262	2.85849	1.04124	1.24867	1.27491	2.52533	2.33494	2.97331	1.40056	1.32375	1.46864	0.896232	1.01875	0.948213	0.973983	1.04526	1.27082	2.02485	2.05656	1.77411	0.94589	0.973362	1.15016	3.26182	2.645	2.72942	F44A6.5	-1.22839	-0.0885105	-0.976429	-1.53027	-1.32285	-0.497465	-1.4455	0.0599601	5.47919e-09	4.03892e-08	0.419852	0.657727	1.70617e-07	1.91539e-06	0.000294161	0.00159597
WBGene00009686	ent-7	15.3311	13.9007	13.5533	6.95285	7.82006	7.64769	13.6676	15.5712	17.644	6.04204	5.91666	5.61999	6.19184	7.19391	7.9542	8.45729	6.28329	6.69254	8.3229	9.08052	8.31756	8.32531	7.99788	8.62937	11.3735	10.7676	10.9987	ent-7	-0.946204	0.11913	-1.29752	-1.02249	-1.03134	-0.744233	-0.789568	-0.371641	1.23475e-10	1.17823e-09	0.140277	0.353788	1.25521e-12	4.33384e-11	7.8406e-09	2.30013e-07
WBGene00009729	F45E10.2	5.64142	5.7196	5.76559	2.35583	2.26852	2.60703	4.96834	5.58637	6.29554	2.07529	2.43144	2.49654	1.87337	1.91853	1.86386	2.51129	3.44776	3.25111	3.18502	2.91745	3.07979	1.98322	2.51926	1.93829	4.26071	3.18438	4.00899	F45E10.2	-1.24129	-0.0348279	-1.28294	-1.58914	-0.886432	-0.891704	-1.40286	-0.591022	2.573e-10	2.35682e-09	0.718466	0.861279	3.34517e-10	7.22581e-09	2.89275e-08	7.28093e-07
WBGene00009740	F45H10.3	144.042	138.984	156.234	125.872	133.14	134.093	150.959	97.659	93.6507	93.5345	99.5692	101.427	93.355	90.3043	86.8226	105.957	103.7	113.008	103.805	101.049	102.642	86.8951	84.4084	73.0412	104.859	109.231	92.0678	F45H10.3	-0.160166	-0.389588	-0.574423	-0.697293	-0.442807	-0.51204	-0.842881	-0.521873	0.104796	0.15962	0.000383756	0.0112579	3.16682e-06	2.43355e-05	1.49528e-05	0.000133906
WBGene00009741	drr-1	9.46562	7.98339	10.7325	14.9536	16.431	16.3295	9.69954	9.18132	8.9005	5.23077	4.97267	4.76192	12.1752	11.7811	12.6164	5.66404	5.91981	6.26396	6.46821	5.64502	6.11078	13.3016	12.2412	12.8352	7.20659	7.72044	7.41926	drr-1	0.760004	-0.0136975	-0.908296	0.379634	-0.647594	-0.618558	0.450086	-0.328291	2.35214e-11	2.51537e-10	0.86067	0.936351	2.9377e-10	6.46629e-09	1.10104e-07	2.29829e-06
WBGene00009773	lipl-2	13.5247	12.675	14.0734	3.90176	3.59272	4.24504	12.3095	16.2459	15.6345	4.93232	4.41827	5.3529	2.65478	3.11199	2.77091	5.28979	5.41918	6.1416	10.3545	9.29121	9.24854	3.65193	3.29092	3.38103	11.8808	10.7232	13.1246	lipl-2	-1.77597	0.120164	-1.44838	-2.23111	-1.24912	-0.475303	-1.9561	-0.179227	2.59951e-14	4.49658e-13	0.146775	0.363318	6.25498e-13	2.26313e-11	1.18833e-05	0.000110539
WBGene00009777	F46C3.2	2.98932	2.43714	2.76616	1.88769	1.60137	2.12492	2.65996	3.68362	2.85923	1.92682	1.49143	1.69238	1.17923	1.25161	1.0047	1.52847	1.60137	1.69306	2.29954	2.09289	1.80885	1.92001	1.63369	1.78164	2.05958	1.90751	2.76428	F46C3.2	-0.551088	0.154439	-0.684361	-1.24573	-0.755067	-0.400506	-0.617636	-0.305874	0.00114833	0.003013	0.244625	0.488659	0.000228319	0.000994535	0.0110384	0.0329613
WBGene00009820	F47B10.9	9.57062	10.4458	8.86881	6.6373	6.83326	7.14131	9.28546	7.79161	7.63352	6.49496	5.7975	7.17757	6.68673	7.56357	6.77545	6.51983	7.14131	7.26459	6.87337	6.96009	6.55204	7.24875	7.56187	7.75703	6.31106	6.55433	7.00656	F47B10.9	-0.483058	-0.221556	-0.562195	-0.451975	-0.45411	-0.4965	-0.351886	-0.535027	2.49257e-06	1.15096e-05	0.00787679	0.0595284	3.75819e-07	3.81241e-06	1.76843e-06	2.29196e-05
WBGene00009824	gpdh-1	9.43459	9.66896	9.74669	79.0128	76.4803	79.6459	11.4439	8.47844	9.79592	1.26689	4.00017	2.7406	31.9557	31.9209	28.9032	3.48216	3.71284	4.47873	4.97205	4.25307	5.19114	51.9884	50.785	44.6705	5.7731	5.36934	5.8821	gpdh-1	3.01672	0.0334178	-1.96899	1.6788	-1.28766	-0.991184	2.34709	-0.756503	5.00158e-21	2.68094e-19	0.799468	0.90706	2.6462e-09	4.74725e-08	1.52879e-06	2.05023e-05
WBGene00009830	cutl-18	5.24425	5.57176	6.19556	1.19311	1.65219	1.65355	4.96834	6.26952	5.70818	1.8632	1.69779	2.09726	1.2291	1.44118	1.60137	1.8932	2.24855	1.94486	3.35472	3.8929	3.30239	1.40723	1.07489	1.07104	4.86741	4.1134	4.37655	cutl-18	-1.95512	-0.00813373	-1.58876	-2.00977	-1.48413	-0.695918	-2.27081	-0.34893	2.04175e-12	2.58142e-11	0.932646	0.971467	2.91706e-11	7.83007e-10	9.16507e-07	1.34674e-05
WBGene00009838	fbxa-187	1.99152	2.10641	2.35979	0.179976	0.204483	0.27634	2.10713	2.25894	2.39888	0.412165	0.308848	0.227103	0.26335	0.115381	0.163406	0.169382	0.224709	0.178866	1.19059	1.18846	1.20431	0.342374	0.269248	0.346131	1.04747	1.10134	1.32506	fbxa-187	-3.35339	0.0670137	-2.84883	-3.69254	-3.53196	-0.850959	-2.79404	-0.904758	2.10453e-10	1.94826e-09	0.567349	0.765947	3.78007e-10	8.06493e-09	3.11182e-06	3.65897e-05
WBGene00009843	F48C5.2	1.87428	1.79058	1.91524	1.15263	1.04794	1.13279	2.35137	1.85052	1.72157	1.08663	1.14717	1.02855	0.973362	0.826967	1.06164	1.15628	1.18748	1.04633	1.39319	1.29495	1.80885	1.08916	0.87529	1.25903	1.5475	1.94486	1.60826	F48C5.2	-0.745214	0.078926	-0.782995	-0.981273	-0.729536	-0.328688	-0.827776	-0.136085	9.2731e-05	0.000309347	0.558202	0.759621	7.87949e-05	0.000391354	0.0331518	0.0814237
WBGene00009854	clec-31	0.671813	0.781823	0.722322	0.210348	0.174276	0.0899412	0.94589	0.976111	0.826967	0.275204	0.240311	0.127199	0.0432314	0.0557608	0.049777	0.169382	0.133009	0.299501	0.63562	0.479036	0.626464	0.0899412	0.052684	0.0957236	0.866587	0.741324	0.807674	clec-31	-2.24169	0.345544	-1.83765	-3.844	-1.8994	-0.312116	-3.22249	0.154023	4.49175e-06	1.96148e-05	0.0884502	0.267211	1.72639e-05	0.000105275	0.177234	0.299974
WBGene00009855	clec-22	0.404605	0.23574	0.246492	0.100299	0.142487	0.0899412	0.346131	0.0866407	0.201717	0.049777	0.0169575	0.0661117	0.0654893	0.0293713	0.0162814	0.0557608	0.0682193	0.0162814	0.0728896	0.0957236	0.12278	0.052684	0.0169575	0.140385	0.402362	0.278511	0.142487	clec-22	-1.43041	-0.67715	-2.93218	-3.2306	-2.93786	-1.63508	-2.61936	-0.196256	0.0214708	0.0406368	0.175897	0.404502	0.00222011	0.00714011	0.0132218	0.0381688
WBGene00009857	clec-28	1.47233	1.70849	1.81236	0.269248	0.401299	0.45035	1.63369	1.12004	1.08916	0.883033	0.374786	0.59979	0.26335	0.174276	0.07642	0.511421	0.507819	0.793842	0.757749	0.826354	0.698364	0.167091	0.374786	0.423735	0.760427	0.513777	0.909262	clec-28	-2.20279	-0.385642	-1.50307	-3.42483	-1.46254	-1.12628	-2.49654	-1.23051	3.45064e-06	1.54332e-05	0.0734626	0.238995	4.13334e-05	0.000222995	0.000196765	0.00114173
WBGene00009859	clec-33	0.760427	0.519484	0.754237	0.0162814	0.052684	0.12278	0.511421	0.47777	0.75067	0.240311	0.308848	0.476665	0.0654893	0.0162814	0.049777	0.27634	0.594923	0.210348	0.481012	0.404605	0.409693	0.0899412	0.0899412	0.0180247	0.580219	0.343787	0.347299	clec-33	-3.86683	-0.259174	-1.01209	-4.15359	-1.04725	-0.635131	-3.59532	-0.711163	8.64927e-05	0.000290265	0.405432	0.647076	0.0156335	0.0381062	0.076197	0.156977
WBGene00009877	F49C12.7	25.4865	26.8001	25.231	11.439	12.3035	12.939	22.8248	24.4857	24.675	9.16801	9.61074	8.50146	10.1912	12.1484	12.9156	20.6486	21.912	21.1327	14.0001	13.8848	14.9716	11.9737	10.6753	11.8008	18.8952	16.3626	19.1202	F49C12.7	-1.087	-0.107595	-1.51532	-1.14828	-0.281823	-0.857152	-1.17707	-0.516031	4.9413e-15	9.60981e-14	0.0838641	0.25879	2.70847e-17	2.24619e-15	5.54419e-13	4.19772e-11
WBGene00009883	F49C12.14	8.00026	7.86794	7.38292	0.872637	0.917178	0.780507	8.51506	9.95131	9.66722	2.92438	2.24082	2.49654	0.865354	0.676254	0.542482	3.03323	3.52238	2.92311	6.3679	6.59015	5.82861	0.67057	0.87529	1.11114	6.18212	6.58415	6.51983	F49C12.14	-3.18687	0.270913	-1.61438	-3.50633	-1.30133	-0.310056	-3.18999	-0.270147	8.59837e-15	1.59709e-13	0.00133049	0.0207936	1.5741e-13	6.37237e-12	0.000966941	0.00439604
WBGene00009895	scl-2	52.149	46.3427	53.353	124.837	157.199	134.694	51.9321	47.8033	45.605	8.46836	10.7232	8.25755	30.6034	29.0879	29.36	7.85832	7.73812	7.99551	22.9698	22.6126	22.8024	60.5977	59.8475	56.0978	31.2444	28.7076	27.771	scl-2	1.44768	-0.0627734	-2.48077	-0.769214	-2.68402	-1.14934	0.219598	-0.792199	1.14371e-19	4.9044e-18	0.373574	0.617816	7.5946e-19	8.67734e-17	3.31202e-14	3.36373e-12
WBGene00009898	dod-23	166.441	171.179	169.746	45.6863	48.5613	45.0382	213.206	195.805	201.864	35.7867	36.7536	33.7232	34.9011	31.3006	34.923	59.2488	53.6779	53.7566	88.5085	94.076	88.5968	141.636	147.61	153.17	124.503	119.955	130.561	dod-23	-1.8683	0.267663	-2.26097	-2.33297	-1.61246	-0.905942	-0.199622	-0.43726	6.27229e-26	1.04741e-23	2.26296e-07	0.000103423	3.5375e-27	3.23346e-24	8.64352e-19	1.92451e-16
WBGene00009902	drd-1	23.0564	23.0849	22.9806	0.892127	0.996025	0.884456	20.1551	20.8917	21.1544	7.55049	6.63969	7.56611	0.896232	0.853299	0.841534	6.92635	7.26109	6.39698	15.112	14.4307	14.2758	1.33564	1.66745	1.49591	20.0743	20.7847	21.6674	drd-1	-4.64552	-0.153266	-1.66846	-4.73823	-1.75274	-0.656283	-3.94758	-0.145703	4.77259e-21	2.58211e-19	0.00193271	0.025352	3.04979e-21	5.35007e-19	1.07276e-13	9.96291e-12
WBGene00009908	F49H6.5	0.973983	0.924219	1.25903	10.2973	11.3219	9.9566	1.32981	0.67057	0.97068	0.377175	0.594923	0.629408	10.2087	11.3316	9.64143	0.937798	0.377175	0.598681	0.669264	0.439527	0.883744	10.1763	9.66896	11.5702	1.15263	0.814351	0.909262	F49H6.5	3.34147	-0.132883	-1.00108	3.32659	-0.85037	-0.702191	3.3254	-0.140423	4.21514e-14	6.99182e-13	0.614989	0.801043	0.00740171	0.0200939	0.0307895	0.0767065
WBGene00009947	F52H3.5	7.34462	6.82029	8.1261	4.46046	5.78797	5.72086	7.2828	5.94477	6.26269	3.98416	4.81452	4.35751	4.45824	4.42891	4.21585	3.63405	4.00637	3.63755	6.21947	5.96871	5.75767	4.46579	5.30513	5.05077	5.96287	4.84184	5.58637	F52H3.5	-0.501804	-0.196096	-0.764765	-0.765059	-0.983217	-0.31029	-0.593509	-0.449223	2.52818e-05	9.5367e-05	0.0443533	0.17337	1.17642e-07	1.38796e-06	0.00325044	0.0120193
WBGene00009964	fip-6	1.28464	0.924219	0.920663	5.07032	5.31844	4.97771	0.913106	1.15263	1.42184	0.609498	0.594923	0.59979	2.73262	2.5531	2.38801	0.511421	1.12379	0.793842	1.32684	0.98921	1.16429	2.49202	2.09289	3.45024	1.32867	1.4621	1.53769	fip-6	2.2984	0.128712	-0.784142	1.29941	-0.395164	0.163503	1.31062	0.471175	6.55479e-12	7.70732e-11	0.56234	0.76231	0.0103586	0.0267309	0.467197	0.608495
WBGene00009972	oac-33	0.671813	0.744512	0.851439	0.423735	0.26335	0.240311	0.94589	0.87529	0.672945	0.377175	0.240311	0.409693	0.26335	0.174276	0.192078	0.236835	0.165854	0.0927874	0.44916	0.594923	0.26335	0.167091	0.201717	0.423735	0.479036	0.278511	0.423735	oac-33	-1.31197	0.143506	-1.16839	-1.87386	-2.34514	-0.873513	-1.68166	-0.978453	0.00083794	0.00226887	0.550237	0.75422	0.00204259	0.00662934	0.00813962	0.0256739
WBGene00009982	F53F1.4	164.638	158.55	172.623	74.9517	94.2668	90.8483	166.963	109.173	107.093	86.7097	89.9098	89.1769	52.2656	51.7824	50.5809	80.2142	84.1211	84.4265	90.1405	83.9421	93.436	42.9851	39.4251	34.8299	94.0002	87.0711	83.0809	F53F1.4	-0.941302	-0.399302	-0.898144	-1.67866	-0.992562	-0.889293	-2.07656	-0.90892	2.98936e-10	2.70397e-09	0.000233669	0.00899808	9.09111e-10	1.78603e-08	9.44085e-10	3.48849e-08
WBGene00009984	F53F1.6	3.93252	4.89696	4.21585	3.76066	3.74061	3.27753	4.11461	5.2935	4.04217	1.22752	1.64162	1.24103	1.90703	2.37327	1.82806	1.52847	1.15328	1.15628	3.65073	3.28725	4.11656	4.33344	3.37794	4.21243	3.41171	2.61322	2.76428	F53F1.6	-0.263566	0.0493016	-1.68044	-1.09037	-1.79222	-0.231207	-0.133567	-0.569527	0.0473178	0.0802829	0.681229	0.840083	3.32998e-09	5.85177e-08	0.0782808	0.16035
WBGene00009991	F53F4.8	1.44118	2.06303	1.77657	1.04124	0.814351	0.94589	1.52494	1.92243	1.63609	0.311275	0.594923	0.409693	0.569914	0.492108	0.458477	0.129589	0.196961	0.299501	1.15771	1.06164	1.44902	1.01875	0.786693	1.22091	1.70091	1.62107	1.46724	F53F4.8	-0.886222	-0.0336827	-2.03043	-1.77195	-3.09279	-0.510493	-0.818582	-0.115674	0.000108669	0.000356828	0.83032	0.922065	2.99996e-07	3.13103e-06	0.0073494	0.0235794
WBGene00010009	F53H4.4	3.30239	2.73998	3.03662	2.35583	2.10061	2.8657	2.88791	2.33494	1.67381	1.95912	2.24082	1.85854	2.29126	2.78166	2.26852	2.39615	3.03562	2.82535	2.2097	2.56394	2.51067	2.52472	2.26921	2.64564	2.50723	3.18438	2.65996	F53H4.4	-0.323639	-0.415714	-0.589376	-0.307969	-0.132528	-0.326613	-0.294035	-0.126717	0.0366502	0.0646066	0.0094254	0.0664061	0.0010534	0.0037116	0.0355374	0.0860179
WBGene00010034	F54B11.11	4.31472	3.78681	4.67586	2.21852	2.06512	2.15718	4.89218	5.12302	4.86005	0.84371	1.0391	0.93904	1.71553	1.47233	1.91274	0.62757	0.476665	0.793842	1.9365	2.36751	2.12851	1.60137	2.26921	2.01707	2.88791	2.67443	3.19621	F54B11.11	-0.985961	0.221518	-2.18542	-1.33955	-2.77562	-1.00324	-1.13472	-0.549508	1.57537e-08	1.07545e-07	0.0280519	0.131315	1.15981e-11	3.43398e-10	1.25649e-08	3.48584e-07
WBGene00010041	F54C9.3	15.2406	15.4794	14.6719	41.9471	40.1255	42.1289	14.5164	16.9985	17.3284	9.7772	9.42471	8.81739	26.991	29.4094	27.8803	7.51735	6.9469	6.99486	16.7081	15.6607	16.2905	36.7801	38.562	35.7075	13.7521	14.565	12.9199	F54C9.3	1.45334	0.0994005	-0.699544	0.893314	-1.08543	0.102575	1.29301	-0.13846	4.30017e-21	2.36683e-19	0.119788	0.321887	2.18153e-10	4.92673e-09	0.112179	0.211946
WBGene00010055	F54D5.12	139.703	138.984	137.347	79.8739	78.3599	76.903	126.209	114.952	117.438	85.8843	90.6928	87.5544	81.659	81.9298	77.7609	66.7602	71.4825	68.4216	116.133	124.25	116.855	82.5766	84.9404	84.6308	111.144	105.039	108.419	F54D5.12	-0.822587	-0.215107	-0.655817	-0.785185	-1.00871	-0.221462	-0.722646	-0.358514	1.54939e-19	6.54703e-18	1.05015e-06	0.000328155	5.03384e-17	3.97376e-15	7.077e-07	1.08383e-05
WBGene00010062	lipl-1	40.5825	40.2098	42.0842	13.3071	13.3497	13.387	46.4008	54.0603	49.0887	17.1094	19.6032	19.1502	10.3511	8.79078	10.1498	35.4414	33.969	32.6084	37.1743	32.1898	34.4969	13.3736	13.3071	12.3287	48.1015	43.8776	47.7785	lipl-1	-1.61655	0.280827	-1.13753	-2.07318	-0.27206	-0.24076	-1.65127	0.183942	3.23109e-19	1.29296e-17	1.48162e-05	0.00225926	3.05819e-16	2.02716e-14	0.00023824	0.00134272
WBGene00010064	F54F7.2	17.3572	17.8624	17.8361	0.721714	0.623883	0.656635	18.5636	21.1068	21.0033	7.83658	9.4633	7.92308	0.569914	0.807674	0.868797	9.47685	9.40395	8.88353	4.48031	4.6527	4.86373	1.05608	1.07489	0.911899	5.49903	5.51522	5.28979	F54F7.2	-4.73762	0.190382	-1.08175	-4.60293	-0.938302	-1.92769	-4.12988	-1.70378	1.23937e-17	3.80958e-16	0.00151688	0.0222497	2.76164e-15	1.53231e-13	2.60558e-19	6.19878e-17
WBGene00010067	dot-1.2	0.816639	0.707884	0.784105	0.129589	0.142487	0.151511	0.682401	0.636929	0.59979	0.311275	0.240311	0.346131	0.234285	0.174276	0.133009	0.27634	0.196961	0.356884	0.231815	0.28854	0.26335	0.342374	0.201717	0.221458	0.439527	0.278511	0.559924	dot-1.2	-2.44345	-0.265922	-1.36608	-2.11291	-1.50387	-1.56704	-1.61837	-0.916939	1.22053e-06	5.98108e-06	0.209678	0.446806	7.75335e-05	0.000386156	1.93996e-05	0.000165235
WBGene00010083	F55B11.1	37.7131	37.223	36.1244	39.4495	41.2435	37.4721	37.7131	38.9531	42.7673	25.3297	26.3432	26.3659	34.6345	32.8321	32.95	43.0944	43.3548	41.8368	29.3069	29.9828	29.9603	33.1753	34.566	34.9997	39.7633	39.2698	39.5888	F55B11.1	0.0885053	0.100568	-0.509347	-0.145695	0.207023	-0.316585	-0.11425	0.0950024	0.0456575	0.0778455	0.0235197	0.117815	1.05211e-11	3.14493e-10	9.27112e-08	1.98046e-06
WBGene00010084	F55B11.2	180.753	180.644	175.376	118.641	116.534	110.89	184.484	166.006	177.47	103.883	108.473	102.142	120.127	117.653	119.068	107.814	108.167	108.219	88.1384	84.9404	86.3954	109.322	110.078	121.978	93.0442	93.7149	100.227	F55B11.2	-0.633028	-0.0252503	-0.772352	-0.589105	-0.727366	-1.04828	-0.657362	-0.904492	7.33513e-16	1.64373e-14	0.503775	0.72187	6.76164e-18	6.5603e-16	3.16666e-21	9.99917e-19
WBGene00010085	F55B11.3	111.339	113.008	118.857	30.5965	31.2136	30.0797	113.402	89.3966	90.9415	46.6687	48.1996	50.3339	32.5765	29.4094	29.8927	54.2715	50.9878	53.0503	35.0197	35.0858	34.2543	29.9793	29.7522	31.7062	42.5755	39.7927	41.2383	F55B11.3	-1.9006	-0.230978	-1.2397	-1.90178	-1.11723	-1.71682	-1.91051	-1.47341	2.14968e-22	1.46406e-20	0.000157371	0.00736672	1.4587e-18	1.59328e-16	1.4007e-21	5.27645e-19
WBGene00010086	F55B11.4	20.3307	21.9391	22.9076	25.6997	28.0409	26.943	21.4408	17.6373	17.2122	11.7841	13.3071	11.9171	13.1388	13.6206	13.5303	15.3577	16.2905	14.8069	14.3728	13.8002	14.565	16.0293	15.1589	13.7404	15.2159	14.565	14.0734	F55B11.4	0.308036	-0.211843	-0.816088	-0.69036	-0.486687	-0.604262	-0.530186	-0.568332	2.99068e-05	0.000110886	0.00316763	0.0337906	1.38491e-11	4.01533e-10	2.73919e-09	9.02686e-08
WBGene00010101	fbxb-57	0.404605	0.559924	0.346131	0.100299	0.174276	0.178866	0.479036	0.404605	0.59979	0.204483	0.140385	0.315972	0.234285	0.140385	0.279805	0.350966	0.224709	0.299501	0.26335	0.439527	0.34017	0.125671	0.234285	0.221458	0.222487	0.44407	0.386511	fbxb-57	-1.59743	0.191143	-1.03318	-1.05602	-0.593275	-0.350874	-1.22812	-0.341401	0.00107933	0.00285499	0.516885	0.730588	0.0135144	0.0335917	0.289207	0.43087
WBGene00010102	F55C9.5	0.279805	0.23574	0.280548	0.049777	0.26335	0.0899412	0.314909	0.176446	0.34017	0.0808829	0.140385	0.0957236	0.175358	0.204483	0.192078	0.204483	0.224709	0.270359	0.204483	0.174276	0.18888	0.0899412	0.201717	0.26335	0.479036	0.209236	0.282599	F55C9.5	-1.38914	-0.00584691	-1.39095	-0.486208	-0.187309	-0.493001	-0.695917	0.198782	0.0111094	0.0228571	0.987955	0.995512	0.0133818	0.0333171	0.256021	0.394948
WBGene00010116	F55F3.2	15.141	16.4719	14.4268	8.63209	8.48257	8.2424	15.3884	16.6858	15.8919	8.65092	9.64933	11.5793	7.3151	6.79266	6.27343	13.2775	13.9249	12.9299	10.062	10.855	11.3498	9.22163	9.10435	9.02198	12.5055	12.6254	12.6449	F55F3.2	-0.854052	0.062692	-0.621588	-1.17021	-0.19481	-0.513042	-0.745311	-0.280959	9.54876e-12	1.08815e-10	0.343629	0.588715	4.87371e-09	8.26579e-08	9.2623e-08	1.98046e-06
WBGene00010118	F55F3.4	0.84371	0.819985	0.690435	0.269248	0.45035	0.27634	0.573975	0.746402	0.636929	0.311275	0.500479	0.19592	0.454863	0.204483	0.252514	1.1191	1.12379	0.84371	0.481012	0.594923	0.224709	0.236835	0.447775	0.346131	0.866587	0.545169	0.62757	F55F3.4	-1.31101	-0.273878	-1.36996	-1.47115	0.370378	-0.980751	-1.25936	-0.235014	0.00122343	0.00319556	0.319646	0.566979	0.00118951	0.00413661	0.00641328	0.0211146
WBGene00010119	F55G7.1	1.22091	1.0391	1.29722	0.94401	0.943338	0.864249	0.876408	1.29495	0.97068	0.513777	0.801822	0.753274	0.999031	0.877423	0.721714	0.736668	0.851439	0.94589	0.819985	1.18846	0.883744	0.707884	0.973362	0.996025	0.866587	1.07104	0.973362	F55G7.1	-0.366043	-0.19428	-0.795724	-0.455358	-0.477618	-0.330217	-0.431823	-0.291212	0.0655831	0.106407	0.292007	0.541227	0.00127558	0.00439455	0.0916868	0.181441
WBGene00010123	F55G11.2	2.819	3.11141	3.39592	1.30578	1.40723	1.38094	3.08772	2.71835	3.63034	1.32637	1.95853	1.43741	0.865354	0.909788	0.898	0.776628	0.626464	0.689154	3.8261	3.47056	3.93833	1.3772	1.43741	0.953094	1.77411	1.80885	1.46724	F55G11.2	-1.18537	0.00669358	-1.00038	-1.79694	-2.16514	0.276885	-1.3019	-0.8821	4.14099e-08	2.64497e-07	0.954175	0.980715	5.0291e-07	4.87935e-06	0.019947	0.0537501
WBGene00010124	F55G11.4	19.4294	26.0782	23.2783	0.917178	0.782896	0.748237	17.0854	18.0331	16.8402	4.63992	5.83399	5.00637	0.699597	0.59979	0.571235	3.85381	3.55843	3.9172	18.2644	19.5663	18.88	1.43741	1.00664	1.3772	11.2974	10.7676	11.5366	F55G11.4	-4.81578	-0.388326	-2.14899	-5.21454	-2.59464	-0.265111	-4.20007	-1.02003	6.96688e-16	1.57544e-14	6.91548e-06	0.00133446	1.41095e-17	1.27625e-15	0.000741208	0.00352094
WBGene00010135	F55H12.4	84.3476	86.9514	86.2851	91.6867	101.023	93.2841	95.3511	80.7172	77.1096	56.5838	54.4162	53.9952	54.5684	52.2254	52.7728	49.0218	50.2377	47.2132	70.3735	75.3864	74.2005	49.3139	54.6703	48.0793	71.3168	76.0581	72.5407	F55H12.4	0.149032	-0.0284862	-0.64295	-0.690545	-0.815215	-0.229397	-0.759257	-0.227853	0.00810548	0.0173019	0.593457	0.784904	5.30099e-12	1.64691e-10	0.000210392	0.00120909
WBGene00010163	F56H6.2	2.819	2.83693	2.76616	10.913	11.8538	11.7811	3.4441	3.01094	2.75383	0.980287	0.698364	1.31081	6.35975	5.62122	5.2935	1.23973	1.15328	2.02485	2.831	2.36751	2.2097	10.2881	8.45043	10.2378	3.3307	2.78963	3.76066	F56H6.2	2.02204	0.127884	-1.50302	1.02882	-0.941696	-0.180537	1.76356	0.215296	1.44212e-14	2.59805e-13	0.41007	0.650598	2.09865e-06	1.70633e-05	0.280679	0.421706
WBGene00010174	F56H9.2	101.373	98.0745	101.427	108.607	111.214	101.159	94.9247	65.9952	69.3541	60.1579	56.2123	52.3164	76.1979	79.8042	74.2469	58.736	58.2278	65.6859	57.6047	54.5684	52.8419	70.1214	73.3867	66.9228	64.8395	62.8633	62.7613	F56H9.2	0.0924838	-0.402543	-0.838353	-0.385571	-0.718642	-0.864992	-0.51395	-0.659314	0.216264	0.294347	1.10713e-05	0.00190421	3.53888e-11	9.31208e-10	1.52626e-11	8.44158e-10
WBGene00010189	F57B1.6	1.32637	1.00337	1.40786	0.236835	0.204483	0.27634	1.43259	1.18846	0.826967	0.479036	0.500479	0.377175	0.204483	0.287354	0.133009	0.937798	0.693904	0.479036	0.44916	0.479036	0.34017	0.342374	0.127199	0.382116	0.580219	0.671813	1.00664	F57B1.6	-2.40828	-0.131743	-1.4899	-2.65196	-0.918839	-1.58165	-2.33588	-0.77111	8.86786e-06	3.65121e-05	0.549962	0.754021	0.000135015	0.000626625	7.17442e-05	0.000494382
WBGene00010226	F58A4.1	1.14353	1.25609	1.1191	0.892127	0.537469	0.62757	0.714778	0.636929	0.869947	0.737968	0.698364	0.728255	0.807674	0.826967	0.59979	0.776628	0.75067	1.10134	0.513777	0.594923	0.698364	0.44916	0.908736	0.786693	0.724271	0.814351	0.594923	F58A4.1	-0.773185	-0.674243	-0.689222	-0.650026	-0.415791	-0.968636	-0.772464	-0.719774	0.00214226	0.00528625	0.0041077	0.0395424	0.00521369	0.0149367	0.00041639	0.00215158
WBGene00010228	clec-161	1.35523	1.0391	0.954048	0.210348	0.234285	0.27634	0.511421	0.507819	0.934651	0.545169	0.665602	0.753274	0.454863	0.414279	0.458477	0.62757	0.819985	0.84371	0.539892	0.404605	0.479036	0.486198	0.234285	0.26335	0.724271	0.671813	0.766279	clec-161	-2.20429	-0.846174	-0.757779	-1.31923	-0.52735	-1.21298	-1.80769	-0.622142	1.18231e-06	5.80438e-06	0.000729406	0.0152121	0.00264463	0.008316	6.97464e-05	0.000482008
WBGene00010236	F58B4.3	2.56394	2.15096	2.38744	2.32726	2.47288	2.68883	2.70038	1.95476	1.458	1.15628	1.21651	1.53237	1.79548	1.70285	1.9425	2.30745	1.8208	1.41337	1.42502	1.60137	1.01645	1.60137	1.95375	1.6095	1.39319	1.62107	1.32506	F58B4.3	0.0670544	-0.247795	-0.865291	-0.391703	-0.416841	-0.841206	-0.461385	-0.715406	0.67837	0.74433	0.15306	0.372498	0.000260595	0.00111171	0.000241867	0.0013564
WBGene00010242	F58D5.2	3.20207	3.89064	3.27637	8.33945	8.28375	9.64002	3.35966	2.82636	2.85923	2.36751	2.39888	2.37327	8.08222	7.79516	8.55438	2.83414	3.03562	3.16076	1.77533	1.83858	2.28996	6.99111	7.60544	5.41867	2.92311	3.24764	2.38351	F58D5.2	1.34209	-0.186732	-0.524186	1.24141	-0.182016	-0.810595	0.958866	-0.273414	2.40363e-12	3.00532e-11	0.169288	0.39543	0.00141948	0.00482524	1.75388e-05	0.000152757
WBGene00010258	F58E6.11	0.877423	1.0391	1.15628	0.721714	0.782896	0.62757	0.94589	0.814351	0.786693	0.412165	0.698364	0.753274	0.834263	0.443556	0.571235	0.736668	0.539393	0.507819	0.669264	0.708856	0.549909	0.67057	0.753274	0.547709	0.795519	0.636929	0.729335	F58E6.11	-0.51659	-0.256804	-0.741081	-0.769288	-0.813018	-0.666099	-0.622467	-0.500253	0.0243572	0.0453579	0.210162	0.447504	0.00435683	0.0128202	0.00664849	0.0217775
WBGene00010293	fbxa-108	3.36725	3.51615	4.14176	4.20115	4.35251	4.59165	3.08772	3.13819	2.75383	2.61322	2.09537	2.56394	4.04872	4.17009	3.56182	2.94649	2.54409	2.92311	2.76305	2.76305	3.04727	3.56913	3.33144	4.707	2.96761	2.39763	3.27372	fbxa-108	0.257342	-0.28909	-0.600973	0.103524	-0.390884	-0.360689	0.0464927	-0.361884	0.0305657	0.0552263	0.0258628	0.124836	0.000149935	0.000687051	0.00814952	0.0256969
WBGene00010296	dgat-2	21.9184	23.0283	23.2459	184.253	187.676	187.307	22.9776	18.9985	19.4885	3.32997	2.90919	3.38491	83.4667	85.8843	83.9421	2.9888	3.623	3.94278	6.4395	5.76187	5.44403	114.238	115.249	114.71	6.60944	6.73207	6.48395	dgat-2	3.0328	-0.151045	-2.80913	1.89155	-2.67095	-1.93893	2.33374	-1.77401	1.9818e-31	2.86815e-28	0.0130906	0.0815158	5.09857e-20	7.08375e-18	1.94948e-19	4.70231e-17
WBGene00010305	F59A2.5	14.0527	14.6513	13.7368	11.2691	10.549	10.6165	12.8574	10.5063	10.6993	9.68628	10.7717	8.99549	9.75143	10.5846	9.64143	10.1498	9.03166	11.276	10.2638	7.6805	8.28671	10.6993	9.90222	9.55317	10.4244	10.8197	10.7485	F59A2.5	-0.382392	-0.317867	-0.53025	-0.497297	-0.477306	-0.68901	-0.486205	-0.404647	0.000105504	0.000347287	0.00065684	0.0146436	1.91077e-06	1.56974e-05	2.67963e-08	6.83366e-07
WBGene00010315	F59B2.13	3.62781	4.04827	2.8929	1.72157	1.67381	1.65355	4.15585	4.62534	3.48216	1.62518	1.6095	2.09726	1.90703	2.13118	1.73917	2.46813	2.35073	2.26581	2.42725	2.40449	2.47288	1.88769	2.02341	1.57111	2.61968	3.33787	2.98751	F59B2.13	-1.03805	0.22816	-0.961701	-0.847318	-0.560823	-0.511209	-0.915037	-0.227838	2.66991e-07	1.48189e-06	0.0546328	0.198537	1.1111e-06	9.80012e-06	0.000638104	0.00310072
WBGene00010337	F59F4.2	166.314	157.199	164.953	64.82	66.2888	63.3505	170.448	118.707	114.277	74.2821	79.0848	82.6684	48.0261	43.7153	42.441	88.1384	87.0381	98.9193	97.611	96.7718	103.206	48.3949	49.1228	39.4706	129.701	139.392	108.639	F59F4.2	-1.3265	-0.296991	-1.04722	-1.86127	-0.832082	-0.714383	-1.82911	-0.377227	1.76696e-13	2.63859e-12	0.00314815	0.033757	2.71481e-11	7.33917e-10	3.56202e-08	8.72519e-07
WBGene00010342	F59F5.3	1.41213	1.52793	1.53179	1.95476	1.62518	1.79789	1.4949	1.88892	1.42184	0.737968	0.735531	0.781823	1.2291	1.49699	1.66622	0.698364	0.943338	0.628795	0.819985	0.439527	1.49143	1.85114	1.49815	1.6095	0.934651	1.10134	0.973362	F59F5.3	0.271647	0.101535	-0.972842	-0.0379261	-0.989273	-0.844886	0.149693	-0.565922	0.161109	0.229833	0.601011	0.790559	0.000967558	0.00344759	0.0020006	0.00800377
WBGene00010411	H25K10.1	2.19904	2.36235	1.49699	0.049777	0.0866407	0.0169575	1.04747	1.85052	1.27082	0.883033	1.57443	0.87529	0.0654893	0.0557608	0.0162814	0.312325	0.314909	0.44407	0.97068	1.22091	1.31301	0.0169575	0.052684	0.0562908	1.35842	1.04526	1.11114	H25K10.1	-5.57003	-0.548917	-0.902862	-5.65485	-2.47836	-0.785143	-5.76145	-0.76665	7.87676e-06	3.28441e-05	0.0141777	0.0859816	0.000870546	0.0031445	0.00182693	0.0074114
WBGene00010413	H25K10.4	0.404605	0.409061	0.413184	0.049777	0.0176617	0.0557608	0.378342	0.537469	0.129589	0.108754	0.049777	0.0957236	0.0162814	0.0293713	0.0162814	0.350966	0.284702	0.270359	0.386511	0.252514	0.26335	0.052684	0.0169575	0.0562908	0.513777	0.378342	0.520555	H25K10.4	-3.41219	-0.414067	-2.30435	-4.30904	-0.45324	-0.444497	-3.41193	0.183231	0.000154076	0.000491071	0.253704	0.498539	0.000626527	0.00236477	0.229828	0.364414
WBGene00010463	K01D12.3	0.196961	0.269248	0.151511	0.049777	0.052684	0.0557608	0.178866	0.209236	0.129589	0.108754	0.0169575	0.0661117	0.092211	0.0557608	0.0162814	0.236835	0.133009	0.0648727	0.100926	0.0957236	0.0169575	0.052684	0.052684	0.0562908	0.154068	0.084508	0.049777	K01D12.3	-1.9295	-0.22459	-2.00473	-2.16835	-0.709864	-1.85783	-1.89808	-1.20238	0.0110434	0.0227428	0.650488	0.821128	0.0112433	0.0287192	0.0132063	0.0381367
WBGene00010571	K04G11.3	2.19904	2.99371	2.8929	2.60703	2.18328	2.15718	2.10713	3.10907	2.75383	2.71716	1.35728	1.69238	2.49654	2.47857	2.68494	2.15933	1.8208	1.60137	2.06007	2.21743	2.83228	2.18928	2.59266	3.27637	2.12671	2.32726	2.42501	K04G11.3	-0.197374	-0.0208984	-0.544086	-0.0605392	-0.55091	-0.187279	-0.0245843	-0.216443	0.277492	0.362079	0.902957	0.956905	0.0101131	0.026218	0.301038	0.443024
WBGene00010596	K06A4.6	0.671813	0.44667	0.722322	0.721714	0.648205	0.656635	0.646365	0.439527	0.636929	0.275204	0.308848	0.377175	0.436003	0.520555	0.312325	0.427577	0.165854	0.381028	0.355563	0.439527	0.513777	0.631653	0.269248	0.176446	0.363901	0.343787	0.246492	K06A4.6	0.159242	-0.10408	-0.908201	-0.529828	-1.01483	-0.494641	-0.907264	-0.935067	0.569543	0.650141	0.719277	0.861501	0.0190884	0.0452098	0.131344	0.239404
WBGene00010613	K07A1.6	18.4139	18.1395	16.477	2.19445	1.74662	1.43994	18.4339	15.1946	16.898	11.5822	11.8665	11.7873	2.31361	2.29126	2.24082	13.9612	13.4144	14.7023	10.6607	10.4079	10.4835	2.26852	2.19809	2.01707	12.8828	12.7828	12.5115	K07A1.6	-3.28621	-0.0725452	-0.585882	-2.9375	-0.330372	-0.744206	-3.00947	-0.471268	6.12914e-19	2.34977e-17	0.236432	0.479713	1.63998e-09	3.06583e-08	1.26202e-11	7.11606e-10
WBGene00010617	K07A1.13	7.21725	7.00368	7.17279	4.51513	3.50891	4.56193	6.72251	6.26952	6.46646	4.8445	4.92606	4.49596	5.04527	4.59756	4.87081	3.97743	3.78681	4.64792	5.78283	4.41039	5.25823	6.46646	6.66615	7.07112	3.71284	3.77049	3.51615	K07A1.13	-0.76744	-0.13713	-0.586101	-0.559923	-0.781144	-0.466525	-0.0862396	-0.956403	1.18329e-08	8.2597e-08	0.111936	0.308788	1.01741e-06	9.08446e-06	1.78912e-05	0.000155147
WBGene00010628	ceeh-2	6.91482	6.73047	6.90631	8.36403	8.5816	7.87602	7.44254	8.91754	7.3151	4.33344	4.41827	5.24425	4.70327	5.21504	5.69968	2.5882	2.85201	2.92311	6.30456	6.11547	6.73427	5.69213	5.55334	6.3679	5.46764	4.07023	4.98263	ceeh-2	0.271476	0.200378	-0.552822	-0.403637	-1.29004	-0.102616	-0.231376	-0.51385	0.00450984	0.0103069	0.0307173	0.138905	1.14189e-05	7.31778e-05	0.280031	0.420983
WBGene00010646	K08C7.1	15.6101	17.1302	15.0247	5.25823	5.59615	5.15904	18.7925	17.7977	18.013	10.3934	11.6368	11.3755	4.62846	4.917	4.84184	12.4743	11.0784	10.4773	11.9888	11.6839	12.3818	5.52685	6.01469	6.16759	12.8485	11.1369	12.9199	K08C7.1	-1.57994	0.197741	-0.514148	-1.73366	-0.498881	-0.40277	-1.4381	-0.373448	3.6869e-17	1.05313e-15	0.00242023	0.0288224	2.79122e-08	3.93466e-07	1.17126e-06	1.64307e-05
WBGene00010657	K08D8.3	6.17499	7.18008	6.5925	4.63307	4.94326	4.52499	7.0867	7.29044	7.75703	4.02125	4.48277	4.43837	4.28643	3.96789	3.85935	5.54379	5.19364	5.89837	6.32596	5.91981	6.30924	5.62508	5.64502	5.59255	9.93512	10.7232	10.4197	K08D8.3	-0.495423	0.153613	-0.617367	-0.712792	-0.254987	-0.0960197	-0.235188	0.646038	6.82348e-07	3.5206e-06	0.0334933	0.14615	3.17292e-08	4.42603e-07	0.194552	0.321452
WBGene00010684	K08F9.1	1.67496	1.49143	1.71902	2.85265	2.37727	2.65478	1.22204	1.85052	1.94926	0.84371	0.833198	0.728255	1.4621	1.83923	1.71757	0.62757	0.314909	0.299501	0.902609	0.826354	0.733426	1.94926	1.40626	1.97733	1.08565	0.671813	0.729335	K08F9.1	0.695937	-0.00113057	-1.04596	0.0309079	-2.13657	-1.00109	0.0946479	-1.0198	0.00017795	0.000558692	0.994881	0.998129	0.000153574	0.00070125	0.000168252	0.00100241
WBGene00010701	ent-2	136.295	134.782	143.987	30.9311	29.4835	34.3094	138.54	126.241	124.903	94.8235	97.3226	98.8671	36.731	36.8921	34.6718	93.1302	91.8171	94.7123	100.521	102.142	99.2565	36.1244	37.4478	37.6998	109.479	105.988	103.231	ent-2	-2.13464	-0.0913879	-0.511446	-1.93701	-0.56896	-0.458946	-1.89951	-0.380939	2.37924e-27	7.51276e-25	0.0234219	0.117495	2.48188e-13	9.77387e-12	2.56285e-12	1.70533e-10
WBGene00010706	cyp-14A2	8.14437	7.35905	8.56504	1.33338	1.02177	1.38094	7.05757	8.1053	8.99285	1.98548	1.92449	2.12492	0.542482	0.826967	0.542482	1.60723	1.29959	1.60137	5.58637	5.19817	4.23247	1.01875	1.04124	1.15016	4.4234	3.77049	4.07501	cyp-14A2	-2.68863	-0.00669691	-1.98968	-3.6648	-2.42126	-0.684065	-2.90735	-0.97452	5.60122e-14	9.04055e-13	0.939147	0.974559	2.8691e-13	1.10975e-11	2.17396e-07	4.10828e-06
WBGene00010737	K10C8.4	0.431352	0.269248	0.246492	0.236835	0.312325	0.392683	0.212778	0.0866407	0.129589	0.171705	0.174276	0.0957236	0.345064	0.443556	0.222487	0.169382	0.100299	0.151511	0.324738	0.324738	0.298269	0.167091	0.127199	0.26335	0.154068	0.343787	0.314909	K10C8.4	-0.0256332	-1.21444	-1.14729	0.0867584	-1.19049	0.0318437	-0.833257	-0.274275	0.942521	0.958568	0.011197	0.0739988	0.0174399	0.041811	0.928334	0.956817
WBGene00010754	K10G4.5	1.57443	1.40723	1.1191	1.1086	0.594923	0.833198	1.80196	1.66905	2.02585	0.737968	1.0391	0.728255	0.834263	0.754237	0.898	0.236835	0.377175	0.413184	1.36123	1.14768	1.35115	0.778434	0.833198	0.911899	1.00788	1.21233	1.15016	K10G4.5	-0.697119	0.421285	-0.719456	-0.712615	-1.97274	-0.0723817	-0.690585	-0.273662	0.00192273	0.00480461	0.0125575	0.0791029	0.00181073	0.0059689	0.679466	0.785639
WBGene00010769	asah-1	88.2199	91.184	98.657	62.972	64.2033	65.3948	116.657	95.9823	91.4154	36.8776	36.8396	39.8797	27.4128	22.0966	23.8362	46.0626	45.1434	45.5193	73.1713	64.5667	66.8407	45.0472	41.798	36.389	92.571	87.3343	81.222	asah-1	-0.528015	0.124785	-1.28605	-1.92284	-1.02086	-0.439185	-1.16867	-0.0902226	5.71607e-08	3.56961e-07	0.0777172	0.24779	1.43078e-15	8.36643e-14	1.29487e-06	1.78193e-05
WBGene00010770	K11D2.4	40.4407	41.7831	42.3391	50.8068	51.1505	55.6274	39.4322	25.6531	28.1924	27.5956	27.8308	31.3716	38.1514	37.0468	36.3122	27.7829	27.5865	26.8805	27.8493	31.2969	29.4213	39.1509	39.6389	32.2201	28.1525	29.5974	26.7563	K11D2.4	0.337236	-0.437959	-0.518399	-0.15829	-0.598168	-0.495254	-0.163227	-0.558517	0.000359466	0.00106171	3.85495e-05	0.00396072	5.70706e-06	4.05376e-05	8.86345e-06	8.70302e-05
WBGene00010808	sepa-1	17.2869	14.4853	16.3679	8.52	8.28375	8.33052	14.1716	15.4138	14.9146	12.7984	10.8972	10.2881	12.5709	11.421	12.5443	13.7488	12.1963	13.3373	10.2638	13.0228	12.4411	12.8387	11.4266	11.3883	13.1796	13.0054	15.2734	sepa-1	-0.939609	-0.11526	-0.514998	-0.402202	-0.298957	-0.448104	-0.435101	-0.221649	8.71033e-11	8.53681e-10	0.157906	0.379433	2.27168e-06	1.82734e-05	1.23846e-05	0.000114406
WBGene00010811	hmit-1.3	32.8321	29.945	31.419	19.974	20.4406	18.7908	30.4676	39.1166	38.5939	18.2731	21.4594	21.6524	18.7073	20.2679	18.0081	13.082	12.4557	12.7984	26.5997	27.4571	25.4007	16.7968	16.5849	18.5811	21.2128	21.8158	21.8054	hmit-1.3	-0.671116	0.187075	-0.620563	-0.725876	-1.29993	-0.24768	-0.865981	-0.540014	1.15215e-09	9.43837e-09	0.00893421	0.063923	6.6913e-09	1.09424e-07	0.00156598	0.00655967
WBGene00010833	M03B6.1	7.52851	7.29044	7.60544	2.85265	2.55082	2.9225	7.44254	7.18806	6.51983	3.73931	3.77174	3.91312	2.0193	2.29126	2.29126	3.63405	4.53812	3.78681	5.66404	5.08491	5.15673	3.30454	3.37794	3.38103	5.99158	5.86291	6.85021	M03B6.1	-1.42465	-0.0834062	-0.968241	-1.76108	-0.906197	-0.491263	-1.15159	-0.266442	3.69275e-14	6.2206e-13	0.259706	0.506378	2.44367e-11	6.65191e-10	1.09124e-06	1.5496e-05
WBGene00010867	tag-260	20.3307	21.8012	20.9121	8.36403	8.42455	8.93234	21.8687	22.8836	20.9049	14.086	12.884	14.0704	8.23832	7.62266	7.47086	12.3011	12.6956	12.1458	18.5201	19.3426	18.3432	9.00907	8.5995	9.20173	18.1234	18.3432	18.0776	tag-260	-1.29426	0.061364	-0.617559	-1.43294	-0.762016	-0.165166	-1.23514	-0.206786	2.89862e-19	1.17344e-17	0.186295	0.417848	1.43249e-12	4.90693e-11	0.00154659	0.00650039
WBGene00010886	M7.10	0.341222	0.306282	0.280548	0.100299	0.11646	0.12278	0.378342	0.240311	0.231815	0.140385	0.174276	0.163406	0.0654893	0.115381	0.07642	0.204483	0.165854	0.270359	0.134253	0.0957236	0.12278	0.0899412	0.052684	0.0562908	0.049777	0.209236	0.115381	M7.10	-1.44524	-0.151374	-0.948367	-1.86626	-0.54558	-1.38234	-2.22839	-1.51875	0.00192817	0.00481335	0.632638	0.811642	0.0195087	0.04604	0.00263916	0.0100892
WBGene00010902	M79.2	17.5275	15.9693	16.7826	9.94152	9.29831	10.1773	14.3345	17.7395	16.3508	9.64002	10.3438	9.39628	7.62266	8.10297	8.55438	12.3334	12.6431	12.5443	10.5941	10.3673	11.1859	8.47426	9.64002	11.0284	12.1752	11.9054	12.4157	M79.2	-0.776301	-0.0618724	-0.781125	-1.05683	-0.423495	-0.648278	-0.807607	-0.464714	4.98434e-11	5.07403e-10	0.356791	0.60047	6.7763e-11	1.7031e-09	1.46449e-09	5.15899e-08
WBGene00010907	M88.4	4.23359	4.22553	5.33444	2.63532	2.47288	2.68883	5.21625	5.3276	4.67078	2.07529	2.20731	2.68013	2.43714	2.13118	2.17195	2.69708	2.35073	2.29126	3.21424	2.98414	2.9759	2.85849	3.01479	2.75568	4.69854	3.63347	4.67198	M88.4	-0.812172	0.151294	-0.974821	-1.02388	-0.913023	-0.575549	-0.663044	-0.0888246	3.21769e-07	1.75563e-06	0.136244	0.347757	4.70734e-08	6.26936e-07	2.78923e-05	0.000222613
WBGene00010924	M153.1	16.8627	16.3573	16.5207	16.8872	20.0743	18.4173	15.9305	14.2648	13.5227	8.93721	9.61074	9.18612	11.5667	11.6368	10.8057	7.21788	7.09759	6.87065	10.4588	11.9648	10.8733	12.0169	11.726	12.0264	9.1613	10.1955	9.71074	M153.1	0.146005	-0.187608	-0.845854	-0.549029	-1.2368	-0.587456	-0.478271	-0.777677	0.0204759	0.0389661	0.00506285	0.0450466	2.17917e-12	7.25012e-11	1.45609e-09	5.13982e-08
WBGene00010925	M153.2	9.16801	9.63661	9.01486	1.70091	1.62518	1.65355	9.73217	8.74384	10.3201	3.54869	3.88179	3.59593	1.53086	1.2246	1.66622	2.78785	3.48817	2.92311	5.86353	6.4588	6.92409	1.43741	1.83989	1.57111	7.07857	6.15326	5.98869	M153.2	-2.48601	0.0451906	-1.33902	-2.67893	-1.60051	-0.538971	-2.53222	-0.536254	5.76504e-16	1.32086e-14	0.54364	0.749258	2.62856e-13	1.02585e-11	4.29641e-07	7.24426e-06
WBGene00010943	M176.4	27.1747	26.6159	28.4001	26.2115	25.3559	25.8452	24.2576	25.9959	24.2785	15.8778	17.7229	16.5133	18.3768	18.1628	17.9911	16.3295	15.2866	16.4163	20.1031	20.4899	19.6747	18.0776	19.95	18.5027	19.1739	18.3084	19.1202	M176.4	-0.0855707	-0.14097	-0.715139	-0.591304	-0.775681	-0.447828	-0.539383	-0.538478	0.0635087	0.103447	0.00351419	0.0359428	1.65835e-14	7.93402e-13	2.31984e-10	9.85052e-09
WBGene00010946	M176.10	1.11114	0.884456	1.1191	0.514968	0.699597	0.719389	0.714778	1.04747	1.08916	0.84371	0.594923	0.377175	0.865354	0.573975	0.689154	1.32867	0.913106	0.94589	0.513777	0.557617	0.513777	0.559924	0.654265	0.786693	0.616643	0.378342	0.594923	M176.10	-0.740332	-0.164743	-0.906329	-0.586059	-0.0129772	-1.00687	-0.691721	-1.03418	0.00650048	0.0142525	0.450743	0.683732	0.00236015	0.00753329	0.00102962	0.00462889
WBGene00010953	clec-190	29.7848	29.1642	30.5004	0.236835	0.234285	0.0899412	36.2099	40.6654	38.862	4.17463	4.51513	4.71573	0.14382	0.174276	0.341797	6.27343	5.68644	5.49677	8.62555	9.58855	8.31756	0.273059	0.165854	0.221458	10.8429	9.1715	9.6597	clec-190	-7.46149	0.369771	-2.74222	-7.23781	-2.37069	-1.76181	-7.14903	-1.59811	9.20504e-14	1.42991e-12	7.63618e-08	4.42058e-05	4.28822e-21	7.37362e-19	8.14281e-20	2.14267e-17
WBGene00010957	nduo-6	14.1218	14.7644	13.9931	7.58905	7.82006	8.30808	11.3094	8.06185	5.67143	6.07305	5.91666	6.72762	4.21243	3.85134	4.61087	5.7023	5.00708	4.94868	8.3229	10.6474	9.96976	6.88783	7.24137	9.62989	9.01959	10.0857	5.91479	nduo-6	-0.85936	-0.818344	-1.19719	-1.77114	-1.46814	-0.584646	-0.885233	-0.809041	7.21498e-06	3.02371e-05	1.11412e-05	0.00190421	1.8842e-07	2.08959e-06	0.000467827	0.00237381
WBGene00010961	nduo-2	67.3265	68.2692	67.5477	36.6616	39.975	45.8662	70.9032	50.9492	44.8419	53.0655	53.3585	38.8971	36.7108	28.6763	40.988	29.007	31.6189	34.3153	67.4307	104.351	76.3191	69.9613	65.9138	110.014	73.6086	81.0592	59.4777	nduo-2	-0.744124	-0.308696	-0.508001	-0.958693	-1.09994	0.255912	0.222004	0.0663107	0.000254377	0.000774648	0.0764286	0.245439	0.00694271	0.019036	0.122544	0.227035
WBGene00010965	ctc-2	457.945	436.453	427.857	316.793	321.656	305.226	422.347	508.943	498.63	322.05	330.181	283.142	243.135	239.799	261.779	313.526	335.096	304.391	870.728	840.012	880.388	655.312	650.544	918.988	644.345	616.179	660.706	ctc-2	-0.487243	0.107276	-0.504926	-0.83089	-0.474263	0.971458	0.725521	0.538729	3.88213e-06	1.71686e-05	0.202046	0.437273	2.45996e-06	1.95168e-05	7.84048e-13	5.74539e-11
WBGene00010981	R03A10.1	3.66831	3.67364	3.36469	3.1689	2.76305	3.49706	3.4441	2.36996	2.71155	2.10828	2.26852	2.2162	2.70419	2.69708	2.80782	2.9888	2.04643	2.82535	2.42725	2.05656	2.02341	3.44091	3.23293	2.79578	3.44251	2.82008	2.42501	R03A10.1	-0.186992	-0.341278	-0.694768	-0.381712	-0.469178	-0.710528	-0.169816	-0.31228	0.167277	0.237228	0.0169847	0.0966461	9.44979e-05	0.000459062	5.88281e-05	0.000418031
WBGene00010983	mocs-1	6.48269	7.68415	5.30944	3.1932	3.42486	3.30454	6.59539	7.72101	7.55527	4.43213	4.48277	4.2026	3.72751	3.27819	2.99919	4.13266	3.85831	4.21718	6.18212	6.42202	6.30924	3.13111	3.57672	3.62781	6.07644	6.58415	6.68538	mocs-1	-0.958909	0.18333	-0.55452	-0.945848	-0.656572	-0.0235256	-0.904898	0.00980553	5.07694e-09	3.76478e-08	0.0527364	0.193836	1.61608e-05	9.93858e-05	0.805171	0.877464
WBGene00011000	R03G8.6	33.3571	31.8544	32.2023	6.75021	7.32221	6.02822	31.4105	32.0355	32.6717	22.4039	21.7126	22.3902	7.90221	8.62937	9.32806	22.2432	23.4327	20.3903	19.4437	21.0513	19.3651	10.0589	9.16612	10.9358	22.0408	18.6018	20.3843	R03G8.6	-2.28794	-0.0209835	-0.55258	-1.92508	-0.567341	-0.708181	-1.7076	-0.680876	4.30655e-21	2.36683e-19	0.700489	0.851286	4.50092e-10	9.46337e-09	2.25877e-12	1.53235e-10
WBGene00011046	R05H10.7	1.6095	1.37016	0.954048	0.0162814	0.142487	0.0557608	1.22204	1.08565	1.08916	0.342374	0.274186	0.377175	0.0162814	0.0557608	0.07642	0.427577	0.75067	0.628795	0.87529	0.826354	0.590267	0.052684	0.052684	0.0957236	0.580219	0.671813	0.698364	R05H10.7	-4.69978	-0.182949	-1.95336	-4.95402	-1.10048	-0.762291	-4.32057	-0.98559	2.79724e-06	1.27606e-05	0.380675	0.624486	1.55871e-05	9.63638e-05	0.00413146	0.014667
WBGene00011059	R06C1.4	257.278	272.156	260.392	209.547	206.015	200.492	279.673	176.625	181.023	139.794	155.567	148.179	135.802	121.339	124.665	156.987	145.433	154.278	166.235	161.913	165.801	134.168	144.507	128.534	174.985	173.954	155.884	R06C1.4	-0.356968	-0.339339	-0.832268	-1.04877	-0.790331	-0.675542	-0.953977	-0.646044	0.000500553	0.00142808	0.000799221	0.015737	1.3566e-09	2.59473e-08	6.08964e-08	1.3934e-06
WBGene00011073	R07A4.2	1.92682	2.10641	2.11503	3.09893	2.8657	2.89216	1.80196	1.92243	2.2468	1.26689	1.42184	1.49883	2.82008	2.69708	2.74156	1.73755	1.87563	1.65961	2.02485	1.52607	2.09175	3.0996	2.83571	2.45068	2.36419	2.15842	1.66905	R07A4.2	0.5313	-0.0500233	-0.543698	0.42761	-0.218373	-0.121289	0.455087	0.00212325	0.000202382	0.000628197	0.711848	0.8579	0.00168212	0.00559215	0.388456	0.533011
WBGene00011082	R07B1.11	1.44118	1.37016	1.33114	1.28798	1.49591	1.43994	1.32981	0.907391	1.34248	0.883033	0.735531	0.907391	1.1227	1.37319	1.12626	1.04526	1.25229	0.909788	1.39319	0.746979	0.768794	0.778434	1.302	1.03316	1.04747	0.814351	0.942246	R07B1.11	0.0181907	-0.239381	-0.71063	-0.195362	-0.384564	-0.538425	-0.43947	-0.570019	0.922189	0.942541	0.222911	0.464088	0.0041298	0.0122515	0.0173892	0.0480658
WBGene00011083	glo-1	4.74188	7.90221	6.52541	8.16362	7.93361	7.68348	5.42853	4.8445	5.04635	2.43843	2.63932	2.7733	5.66637	5.35478	4.93994	3.85381	3.64807	3.6722	2.98751	3.79568	3.23293	6.57899	8.03086	7.22653	4.45767	4.53089	5.81792	glo-1	0.358278	-0.281275	-1.25032	-0.220443	-0.741878	-0.914065	0.228264	-0.342962	0.00416053	0.00960213	0.0330123	0.145109	3.9563e-08	5.35117e-07	1.0708e-06	1.5243e-05
WBGene00011121	R07E5.17	0.973983	0.633246	0.754237	0.594923	0.671813	0.481012	0.781823	0.67057	0.75067	0.342374	0.500479	0.536143	0.728255	0.59979	0.925647	0.776628	0.409693	0.567005	0.481012	0.785398	0.768794	0.742306	0.623883	0.75067	0.724271	0.814351	0.662475	R07E5.17	-0.442496	-0.097327	-0.796057	-0.094961	-0.5008	-0.269603	-0.166022	-0.0965979	0.0859629	0.134558	0.670572	0.834886	0.00848566	0.0225717	0.265961	0.405578
WBGene00011124	sdz-27	42.122	40.5681	38.842	3.09893	3.16444	3.09512	42.0066	39.2273	43.1912	26.5274	27.4879	28.1336	4.93232	4.51098	4.63992	27.9983	29.6496	27.87	23.0182	22.6972	21.5478	6.27343	5.74391	6.71918	23.0226	22.9134	24.7523	sdz-27	-3.70243	0.0316867	-0.564536	-3.11243	-0.50736	-0.853483	-2.70829	-0.783509	1.91617e-24	2.05421e-22	0.456621	0.688919	9.0668e-13	3.2267e-11	7.3928e-17	1.1779e-14
WBGene00011155	R09B3.2	265.087	276.072	277.307	222.14	223.254	224.528	292.876	187.435	188.467	179.139	171.96	160.095	136.407	139.794	136.263	167.179	179.467	172.127	181.726	166.112	174.64	151.897	152.151	155.041	179.722	180.315	175.956	R09B3.2	-0.288246	-0.320818	-0.680846	-0.987532	-0.656616	-0.646262	-0.833551	-0.609806	0.00218017	0.00536607	0.000789593	0.0157116	1.99023e-08	2.9119e-07	4.67686e-08	1.10658e-06
WBGene00011156	R09B3.3	581.049	571.81	601.897	551.315	549.598	563.616	618.58	323.845	335.096	328.807	347.24	296.24	289.736	298.644	299.357	323.363	336.016	332.496	342.033	315.324	351.374	306.881	295.743	315.799	341.501	344.919	325.582	R09B3.3	-0.0761948	-0.521545	-0.856115	-0.982908	-0.822173	-0.798903	-0.934997	-0.793933	0.512674	0.597919	0.000127031	0.00668021	1.0797e-07	1.28624e-06	3.17918e-07	5.594e-06
WBGene00011162	chil-19	0.700701	0.707884	0.312325	0.594923	0.423735	0.481012	0.781823	0.842509	0.525336	0.140385	0.174276	0.0661117	0.234285	0.414279	0.458477	0.27634	0.133009	0.0468966	0.355563	0.28854	0.34017	0.413184	0.409693	0.513777	0.684565	0.513777	0.698364	chil-19	-0.106316	0.405396	-2.25012	-0.614685	-2.26974	-0.718669	-0.296213	0.220427	0.751786	0.806736	0.191795	0.424806	0.000696116	0.00259374	0.0717355	0.149974
WBGene00011165	R09D1.9	0.700701	0.965141	0.920663	0.669264	1.02177	1.1086	0.815982	1.01645	1.23253	0.342374	0.341222	0.163406	0.781823	0.548838	0.66043	0.204483	0.224709	0.240311	0.757749	0.67057	0.920663	1.15628	0.87529	0.829635	0.651577	0.706068	1.07803	R09D1.9	0.0797443	0.240409	-1.72888	-0.378482	-1.96424	-0.12915	0.160967	-0.106114	0.731773	0.790391	0.289721	0.538625	0.000118137	0.000559042	0.597637	0.719926
WBGene00011166	chil-22	4.91113	5.49391	5.19364	1.30578	1.43741	1.43994	4.96834	5.36613	4.67078	1.40056	1.38446	1.53237	1.53086	1.25161	1.03084	0.698364	1.69414	1.24103	2.98751	3.0902	2.51067	1.22698	1.04124	1.45425	3.47774	3.10835	3.62201	chil-22	-1.88904	-0.050169	-1.83433	-2.02631	-2.13292	-0.857048	-2.07591	-0.608999	4.75544e-11	4.86096e-10	0.6431	0.817503	1.30636e-10	3.08674e-09	3.88601e-07	6.66223e-06
WBGene00011167	chil-23	1.41213	0.59979	1.33114	0.490807	0.537469	0.599235	1.18634	1.74784	1.34248	0.479036	0.374786	0.476665	0.482202	0.367495	0.341797	0.129589	0.133009	0.178866	0.513777	0.594923	0.626464	0.486198	0.269248	0.786693	0.616643	0.513777	0.876408	chil-23	-0.980842	0.408995	-1.26431	-1.4304	-2.8546	-0.888854	-1.22276	-0.70847	0.00494067	0.011155	0.089016	0.268254	0.00168872	0.0056098	0.0084098	0.0263729
WBGene00011180	R09H10.2	1.89124	2.52472	2.11503	0.97068	0.996025	0.94589	1.90174	2.22088	2.13686	0.737968	1.14717	0.842509	0.865354	1.2246	1.12626	0.698364	0.819985	0.743452	1.39319	1.10134	1.01645	0.67057	0.591483	0.953094	1.63246	1.37149	1.43306	R09H10.2	-1.15252	-0.0470947	-1.27669	-1.024	-1.51748	-0.881727	-1.6066	-0.545458	8.36181e-07	4.23381e-06	0.728305	0.865682	5.06623e-07	4.90716e-06	1.55279e-05	0.00013794
WBGene00011181	R09H10.3	19.1439	17.3147	17.5186	14.0396	13.7772	13.4663	20.2612	15.6345	17.1486	10.0014	9.37357	9.93863	10.4348	11.2193	11.7189	10.7062	10.2851	10.53	12.88	12.7249	12.4926	11.1896	10.636	11.5017	13.6898	13.5025	12.9199	R09H10.3	-0.386414	-0.0331902	-0.880908	-0.697372	-0.777732	-0.502705	-0.699348	-0.429001	3.16995e-06	1.42734e-05	0.600837	0.790486	2.3361e-12	7.72783e-11	4.94974e-08	1.1648e-06
WBGene00011182	R09H10.5	213.451	220.08	205.158	159.4	158.493	154.752	199.336	218.16	226.131	140.083	142.04	142.587	96.3973	98.0745	100.206	193.802	194.22	182.519	171.128	177.944	179.823	124.066	128.649	134.574	186.837	183.984	199.336	R09H10.5	-0.433487	0.00903456	-0.587973	-1.11613	-0.163631	-0.272398	-0.723465	-0.164087	1.26685e-11	1.41579e-10	0.816583	0.914647	1.24075e-14	6.08705e-13	1.5645e-07	3.11233e-06
WBGene00011205	R10E4.9	13.691	14.0561	13.0568	11.7462	10.549	10.8886	12.8574	9.79592	11.5005	8.046	8.78597	8.71789	10.7717	10.7794	10.8057	8.37324	8.53014	9.01603	9.4821	9.50891	9.33197	9.53867	9.45682	10.2826	8.98764	8.31875	8.70605	R10E4.9	-0.294439	-0.264473	-0.673353	-0.333123	-0.650135	-0.52497	-0.481838	-0.648892	0.000176455	0.000554761	0.000487511	0.0125211	8.74171e-10	1.7252e-08	4.91407e-08	1.15797e-06
WBGene00011222	R10H10.3	54.76	58.0151	55.5231	35.1703	34.3867	33.1692	55.1238	49.2485	52.1593	39.5672	40.9618	36.6249	22.0084	21.5766	22.966	37.1947	38.1096	35.6872	47.087	45.0925	46.2057	25.6307	27.4571	29.6255	38.835	39.6118	42.7324	R10H10.3	-0.710919	-0.104858	-0.525895	-1.34069	-0.60171	-0.280582	-1.03214	-0.474782	2.12997e-14	3.72144e-13	0.0307452	0.138905	2.02879e-11	5.66034e-10	2.15567e-06	2.70307e-05
WBGene00011229	R11.4	2.39888	2.43714	2.53023	1.52494	1.40723	1.47381	2.18219	1.66905	2.21228	1.29495	1.32375	1.24103	1.79548	1.62772	1.60137	2.12492	1.53086	1.51189	1.39319	1.68088	1.52607	2.10436	1.76428	1.25903	2.02119	1.83989	2.48357	R11.4	-0.742209	-0.297825	-0.939343	-0.554111	-0.553837	-0.694443	-0.533575	-0.230447	7.53777e-05	0.000256281	0.0430528	0.170241	9.75988e-06	6.40831e-05	0.000144969	0.000886505
WBGene00011231	R11A5.3	2.59059	2.06303	1.85052	0.721714	0.537469	0.864249	2.03125	1.59895	1.94926	1.35842	1.28237	1.2777	0.999031	0.853299	0.689154	1.32867	1.08335	1.74784	1.19059	1.14768	1.31301	0.67057	0.939661	0.75067	1.5475	1.37149	1.38307	R11A5.3	-1.61614	-0.221952	-0.718257	-1.34455	-0.64724	-0.819994	-1.44779	-0.586843	1.51676e-07	8.83351e-07	0.146244	0.362365	0.000332607	0.00137075	7.65668e-05	0.000521261
WBGene00011262	pho-8	7.07732	6.21947	6.23514	0.698364	0.754237	0.748237	5.55732	6.80092	6.69605	3.29092	2.94346	2.92438	0.482202	0.468998	0.781823	5.00525	6.01579	5.53338	4.31827	3.93772	4.60396	0.596149	0.786693	0.423735	4.73473	4.97142	5.28979	pho-8	-3.14134	-0.0449139	-1.09434	-3.53585	-0.235858	-0.602205	-3.43457	-0.38328	2.20757e-13	3.24082e-12	0.615943	0.80122	4.00795e-10	8.53015e-09	1.80026e-06	2.32454e-05
WBGene00011353	T01H8.2	9.50663	10.9238	10.1351	11.0127	9.66896	9.9566	9.57927	9.66547	9.41211	6.70352	7.39429	6.82962	7.5457	8.31756	9.5031	6.2276	5.97832	6.50445	7.91786	7.80744	6.96136	9.05533	10.8256	10.0768	7.99066	6.78378	7.23713	T01H8.2	0.0116864	-0.0866967	-0.543144	-0.273808	-0.701838	-0.42517	-0.0274441	-0.471829	0.8819	0.911339	0.277645	0.526027	1.05667e-06	9.38196e-06	2.38933e-05	0.000195365
WBGene00011364	T02B5.3	13.6653	14.81	12.989	10.5947	11.0987	10.0387	13.6015	17.039	16.2888	2.2097	2.02927	2.02224	7.24196	7.67168	7.41475	1.44653	1.91524	1.27082	5.45262	5.72331	6.55204	9.64002	9.16612	9.20173	4.90082	5.95622	5.51118	T02B5.3	-0.383664	0.174212	-2.73443	-0.890625	-3.1927	-1.23215	-0.563112	-1.34337	4.21276e-05	0.00015157	0.0227179	0.115634	3.66143e-16	2.35512e-14	2.99243e-13	2.43989e-11
WBGene00011365	T02C1.1	2.33623	2.39888	2.07773	1.24735	1.46407	1.27491	2.65996	1.95476	2.54566	1.49699	1.35728	1.66143	1.04747	1.55849	1.27491	1.92819	2.04643	1.88287	1.80196	1.60137	1.84394	1.66905	1.53418	2.13595	2.02119	2.22565	1.46724	T02C1.1	-0.779887	0.0590804	-0.590487	-0.826693	-0.216486	-0.372562	-0.380989	-0.26802	0.00011061	0.000362582	0.677973	0.838234	0.00161503	0.00539805	0.0242615	0.0632182
WBGene00011374	T02D1.8	18.1295	18.0467	18.4884	11.1907	9.84098	10.1455	20.9016	19.1374	17.8903	13.3894	12.1694	11.7303	9.95396	9.59332	9.84098	12.8118	15.0984	15.538	17.2611	16.4719	15.3907	9.99436	10.4186	12.2361	17.7863	17.3382	18.0011	T02D1.8	-0.805818	0.0835399	-0.555258	-0.893958	-0.326218	-0.153053	-0.755295	-0.0416072	2.82583e-11	2.97922e-10	0.211106	0.448364	3.34392e-08	4.63479e-07	0.0325807	0.0803505
WBGene00011390	T02G6.7	0.249852	0.371314	0.413184	0.0162814	0.0176617	0.0169575	0.284702	0.240311	0.412165	0.140385	0.112896	0.0450267	0.0162814	0.0293713	0.049777	0.092211	0.133009	0.0927874	0.0488441	0.211465	0.0888273	0.0169575	0.052684	0.0180247	0.402362	0.343787	0.347299	T02G6.7	-4.38428	-0.154025	-1.9795	-3.62184	-1.71537	-1.8711	-3.80978	0.121663	1.67273e-06	7.99625e-06	0.649418	0.820638	0.000776444	0.00285386	0.00082194	0.00384851
WBGene00011397	T03E6.8	5.35196	6.06464	5.47497	1.90921	1.65219	1.89832	6.0074	6.01643	6.99486	3.08322	3.11199	2.92438	1.8208	1.91853	1.99957	2.5882	2.18583	2.02485	3.88642	3.70416	3.53991	1.737	2.2342	2.18328	4.57961	3.85883	4.79129	T03E6.8	-1.63663	0.168976	-0.893607	-1.5666	-1.34013	-0.599173	-1.47901	-0.35744	8.35745e-13	1.1304e-11	0.0529269	0.19433	5.0258e-09	8.49874e-08	1.31457e-06	1.80368e-05
WBGene00011430	T04C12.8	1.07869	1.11114	1.1191	1.95476	1.79919	1.87083	0.976111	1.01645	0.869947	0.702891	0.698364	0.728255	1.4832	1.40056	1.82806	0.664084	0.626464	0.689154	1.15771	0.67057	0.663592	1.63826	1.73097	1.93829	0.616643	0.671813	0.729335	T04C12.8	0.766525	-0.205007	-0.628975	0.492139	-0.735168	-0.428219	0.670109	-0.713141	1.95453e-05	7.51314e-05	0.239856	0.48286	0.00367019	0.011066	0.0278982	0.0708448
WBGene00011447	T04F8.9	0.580219	0.884456	0.884456	0.32204	0.26335	0.34017	0.682401	0.59979	0.97068	0.412165	0.407267	0.377175	0.436003	0.26335	0.571235	0.589691	0.75067	0.793842	0.481012	0.632269	0.26335	0.377175	0.165854	0.382116	0.580219	0.378342	0.282599	T04F8.9	-1.32847	-0.0665528	-0.952142	-0.947682	-0.0934866	-0.837116	-1.44996	-0.952764	0.00142781	0.0036785	0.802088	0.908136	0.00992406	0.0258049	0.0157191	0.0441339
WBGene00011486	T05E12.3	12.0861	10.8784	12.0539	1.79789	1.60137	2.15718	11.1412	11.8456	11.0273	3.12004	3.31688	3.44091	0.807674	0.909788	1.06164	7.51735	7.51735	7.64643	5.92194	6.08165	6.652	2.68755	2.79911	2.13595	9.18501	9.92145	10.6183	T05E12.3	-2.66123	-0.0423138	-1.8201	-3.65708	-0.625252	-0.910911	-2.18889	-0.240023	8.14535e-18	2.63924e-16	0.51887	0.731846	1.32427e-16	9.58277e-15	2.46067e-12	1.66282e-10
WBGene00011487	T05E12.6	61.2132	60.3573	55.6367	34.2121	33.0708	34.8175	53.2139	48.0337	49.2959	18.6534	22.5208	20.4082	17.1094	15.4021	17.8524	11.4816	9.73156	10.1215	31.1399	35.5216	33.0958	29.4977	31.5298	34.2543	40.7973	40.8596	42.441	T05E12.6	-0.796459	-0.235601	-1.53255	-1.82425	-2.51751	-0.835727	-0.904114	-0.514404	6.35235e-14	1.01212e-12	0.000158474	0.00737858	1.67648e-19	2.12521e-17	2.33132e-14	2.48393e-12
WBGene00011571	ttr-46	105.642	107.271	106.257	68.2015	68.0272	67.836	106.7	106.57	100.893	46.7923	53.0898	46.7705	38.2983	39.1769	42.122	50.9072	48.2914	48.1485	82.3706	79.0546	78.095	59.4777	56.7804	55.8802	79.5022	81.2953	81.8551	ttr-46	-0.645142	-0.0223641	-1.12592	-1.41887	-1.11768	-0.413496	-0.890138	-0.395441	4.61595e-16	1.08039e-14	0.54856	0.752991	1.14164e-21	2.22773e-19	1.4526e-11	8.0857e-10
WBGene00011581	T07D10.1	0.222487	0.409061	0.246492	0.160002	0.26335	0.240311	0.284702	0.176446	0.129589	0.204483	0.174276	0.0162814	0.14382	0.174276	0.133009	0.204483	0.100299	0.210348	0.170646	0.133009	0.155218	0.125671	0.052684	0.176446	0.12278	0.241803	0.115381	T07D10.1	-0.394876	-0.575426	-1.85198	-0.914924	-0.801021	-0.886148	-1.47697	-0.898599	0.410944	0.500201	0.247947	0.49235	0.00933957	0.0244905	0.104743	0.201248
WBGene00011586	flp-33	4.31472	4.12174	4.67586	5.18937	4.32671	4.39329	3.65695	2.75204	2.54566	3.08322	3.11199	2.831	3.69623	3.40587	4.1931	3.03323	3.623	3.13703	2.76305	2.33053	2.39888	3.37285	2.9225	2.83693	2.8116	3.18438	2.35137	flp-33	0.0890992	-0.55547	-0.537133	-0.223001	-0.416879	-0.795641	-0.513619	-0.65369	0.425078	0.514305	0.000109463	0.0061324	0.00023368	0.00101484	2.21716e-06	2.76222e-05
WBGene00011670	fbxa-84	1.81167	2.43714	2.07773	0.490807	0.782896	0.513777	1.73574	2.25894	2.63866	1.4621	1.24967	1.53237	0.314909	0.287354	0.431352	0.664084	0.851439	0.44407	1.22091	1.4085	1.41213	0.309995	0.654265	0.589117	1.50287	1.21233	1.32506	fbxa-84	-1.89055	0.0567881	-0.569679	-2.68945	-1.77774	-0.649968	-2.14497	-0.644294	2.87122e-07	1.58099e-06	0.721011	0.862323	0.00519477	0.0148944	0.00171878	0.00707349
WBGene00011699	cyp-34A2	3.20207	2.55907	2.70293	0.44667	0.401299	0.366258	3.68419	5.05682	3.90602	1.95912	1.21651	1.72157	0.345064	0.23574	0.192078	1.52847	1.69414	1.44595	1.83169	1.96439	1.84394	0.273059	0.306282	0.306282	2.50723	2.26109	2.27536	cyp-34A2	-2.77779	0.56636	-0.808596	-3.46049	-0.858275	-0.585847	-3.23291	-0.265598	2.13909e-09	1.6787e-08	4.82571e-05	0.00447974	2.48442e-05	0.000143488	0.000431237	0.00221577
WBGene00011707	T11B7.2	2.94808	3.18438	2.60703	4.84986	4.67935	4.67463	3.2457	2.97331	3.59914	1.43259	2.09537	1.63369	4.60396	4.74808	4.80505	5.00525	5.2211	5.17978	2.61322	2.98414	2.32654	4.05483	3.74713	4.17009	2.85265	3.52784	3.11507	T11B7.2	0.710848	0.166373	-0.776393	0.703974	0.828683	-0.146292	0.456212	0.123062	2.03931e-07	1.15665e-06	0.141574	0.35576	6.70667e-06	4.65155e-05	0.223957	0.35729
WBGene00011753	T13F3.6	155.394	155.822	153.776	53.8824	57.1422	51.1036	159.4	147.61	151.074	65.5346	75.2445	64.1791	51.2395	52.4188	52.0411	66.221	67.3646	68.9946	140.877	124.87	135.528	90.5799	76.3355	96.9464	170.137	161.913	186.021	T13F3.6	-1.52218	-0.0221091	-1.18766	-1.57912	-1.1982	-0.212656	-0.829453	0.153102	9.23637e-20	4.03035e-18	0.703678	0.85293	2.75498e-17	2.26757e-15	0.00109969	0.00487701
WBGene00011797	T16G1.3	0.580219	0.59979	0.615502	0.0778796	0.052684	0.151511	0.511421	0.537469	0.484815	0.0808829	0.140385	0.19592	0.0162814	0.0162814	0.049777	0.0557608	0.0162814	0.0927874	0.170646	0.211465	0.26335	0.0899412	0.0899412	0.0180247	0.049777	0.142487	0.211465	T16G1.3	-2.78748	-0.222261	-2.15575	-4.61782	-3.72399	-1.49416	-3.40759	-2.36736	7.33431e-05	0.000249853	0.450957	0.683857	0.000274425	0.00116299	0.0012079	0.0052734
WBGene00011821	cdf-2	6.64483	6.87337	6.47343	10.2112	9.05349	8.73388	6.05369	6.05509	6.06291	3.73931	3.55644	3.32169	7.72925	6.95174	6.30804	2.78785	2.72942	3.10376	4.63992	4.97771	4.23247	9.22163	7.93361	8.05886	5.53559	5.42677	5.47393	cdf-2	0.488984	-0.135779	-0.912857	0.0699548	-1.2044	-0.530759	0.335421	-0.280414	5.21332e-07	2.75029e-06	0.107262	0.300727	7.62232e-10	1.52332e-08	2.17989e-06	2.72361e-05
WBGene00011823	T18D3.6	9.33587	9.43775	10.6527	3.14418	3.14175	2.95504	9.64002	7.93834	8.94441	6.4285	5.62122	7.12142	2.75677	2.88746	3.38971	6.51983	5.78409	6.03366	7.73333	7.1926	6.20893	3.20558	2.86435	3.02412	8.32115	6.69605	6.51983	T18D3.6	-1.66602	-0.151953	-0.61597	-1.71048	-0.68568	-0.475958	-1.69168	-0.455734	3.55725e-13	5.03906e-12	0.0967501	0.281734	1.13812e-06	1.00029e-05	2.73973e-05	0.000219662
WBGene00011830	cyp-29A2	21.9611	20.2679	20.4637	33.2562	36.437	31.7431	22.3483	22.7494	23.0849	12.524	13.5977	11.64	22.4895	20.4941	22.5256	13.1854	14.2607	13.7033	16.5004	16.7004	15.6669	25.9187	24.0646	29.3972	19.3908	17.9619	19.153	cyp-29A2	0.691292	0.119621	-0.740703	0.0596935	-0.60832	-0.361841	0.327795	-0.152426	3.44002e-12	4.20428e-11	0.067293	0.226413	8.43851e-11	2.06702e-09	1.10536e-05	0.000103711
WBGene00011850	T20B3.1	6.69799	6.82029	6.96339	10.913	11.6707	11.8376	6.8022	6.56749	6.0193	3.90711	4.71921	5.24425	7.5457	7.15122	6.55928	3.14301	3.18233	3.8929	6.3679	5.8129	5.78603	7.42554	6.85541	6.3057	5.64502	4.7654	4.55917	T20B3.1	0.742467	-0.0762206	-0.559422	0.0546181	-0.990122	-0.183582	0.0131059	-0.454219	8.13881e-10	6.8715e-09	0.403356	0.64557	7.46641e-06	5.10107e-05	0.0575614	0.126253
WBGene00011852	clec-26	4.47514	3.51615	3.76066	0.743452	0.648205	0.45035	4.11461	3.91023	4.34978	1.1227	1.11181	1.20791	0.234285	0.26335	0.279805	0.776628	0.782896	1.10134	3.01479	2.72702	2.87052	0.559924	0.557617	0.26335	3.11084	2.99919	3.4384	clec-26	-2.63729	0.0712873	-1.73973	-3.83889	-2.1072	-0.438342	-3.0615	-0.299616	2.69036e-11	2.84725e-10	0.49216	0.714239	1.86238e-10	4.27266e-09	0.000689403	0.00331567
WBGene00011929	T22G5.1	0.641366	0.744512	0.754237	0.490807	0.287354	0.308848	0.714778	0.537469	0.567005	0.545169	0.308848	0.28854	0.542482	0.468998	0.513777	0.664084	0.66043	0.689154	0.0488441	0.174276	0.18888	0.167091	0.409693	0.0957236	0.222487	0.44407	0.246492	T22G5.1	-0.982358	-0.232147	-0.966074	-0.481572	-0.0764764	-2.63133	-1.86296	-1.27857	0.00705639	0.0153531	0.398662	0.640892	0.00854379	0.0226993	4.20087e-05	0.000315112
WBGene00011936	pgrn-1	36.4255	40.0023	39.2904	63.1338	64.4511	68.19	36.8826	37.7585	37.8299	25.8869	25.231	26.4825	47.2767	45.8887	46.2313	32.964	32.3581	32.8711	29.36	33.1079	30.185	52.4119	48.978	46.7365	38.1031	37.8299	36.1372	pgrn-1	0.759746	-0.0386113	-0.573407	0.271492	-0.23455	-0.323259	0.360149	-0.0434207	1.15205e-16	2.94664e-15	0.410427	0.650874	5.52702e-12	1.71227e-10	2.74633e-07	4.97866e-06
WBGene00011938	alh-13	43.0258	45.1614	42.863	24.6257	24.6912	24.7134	45.2937	45.2082	46.1027	27.1159	27.9475	26.4825	21.046	21.1019	22.2871	22.6314	22.7806	21.5478	29.1642	29.5336	27.7444	20.8993	23.3547	21.3544	24.675	27.0632	25.816	alh-13	-0.823351	0.0607365	-0.685063	-1.02531	-0.970369	-0.599991	-0.997785	-0.756674	1.50196e-17	4.55226e-16	0.125272	0.331191	1.3872e-15	8.13901e-14	2.02619e-14	2.21313e-12
WBGene00011984	T24C2.5	5.6745	5.49391	5.73509	3.38971	2.83693	2.74534	6.2295	5.15855	4.34978	0.84371	1.38446	0.93904	2.15842	1.65086	2.11503	1.96773	1.66024	1.38094	2.69481	2.21743	2.39888	3.20558	2.16391	2.33494	3.98182	4.64922	4.17636	T24C2.5	-0.908247	-0.110598	-2.44474	-1.52352	-1.78441	-1.2017	-1.14546	-0.401875	4.22071e-07	2.25889e-06	0.34079	0.586457	1.02586e-10	2.47102e-09	1.30772e-08	3.62056e-07
WBGene00011997	T24F1.5	4.13339	3.93589	4.77026	3.1932	3.71284	3.49706	5.10263	3.26601	2.67642	2.71716	2.24082	2.52916	2.08912	2.58179	2.36027	3.71384	3.88849	3.54658	3.18502	2.33053	3.00825	2.78963	2.33053	3.27637	3.07017	2.85797	2.62767	T24F1.5	-0.307525	-0.253104	-0.775663	-0.86736	-0.202093	-0.586337	-0.63506	-0.582639	0.0483429	0.0817579	0.0940511	0.277033	0.000103338	0.000496724	0.00103276	0.00464179
WBGene00012013	ugt-54	7.65284	7.42341	8.26541	8.03158	8.01254	7.21725	7.22349	9.51778	9.06874	4.47006	4.92606	5.12302	7.36492	6.00481	6.77545	4.3798	3.71284	3.43584	8.77579	8.06185	8.8928	6.42435	5.34595	6.71918	8.62746	9.27743	8.80959	ugt-54	-0.00405911	0.13288	-0.686523	-0.219269	-1.0423	0.142424	-0.352178	0.195626	0.966225	0.97538	0.160889	0.383759	1.09175e-06	9.63925e-06	0.137481	0.248213
WBGene00012046	T26E4.4	0.641366	0.44667	0.545169	0.179976	0.174276	0.210348	0.378342	0.404605	0.484815	0.275204	0.308848	0.19592	0.092211	0.174276	0.100299	0.236835	0.165854	0.210348	0.324738	0.324738	0.155218	0.204483	0.341222	0.0957236	0.222487	0.278511	0.423735	T26E4.4	-1.52313	-0.373557	-1.0913	-2.18392	-1.42167	-1.08028	-1.46528	-0.867138	0.000556454	0.00157316	0.198757	0.433046	0.00457647	0.0133849	0.00428544	0.0151056
WBGene00012104	sygl-1	127.095	128.19	140.789	149.109	156.412	161.521	141.262	92.2859	75.8706	81.5516	83.2354	92.5402	94.1366	85.6767	87.6267	89.2124	85.1256	84.5282	82.6684	85.0329	79.9842	91.0561	93.2121	75.7385	86.1413	82.0795	78.89	sygl-1	0.237416	-0.398204	-0.619788	-0.5653	-0.612999	-0.67548	-0.605048	-0.678936	0.0345709	0.0614149	0.00124451	0.020186	8.8587e-06	5.90365e-05	2.2813e-06	2.82995e-05
WBGene00012140	T28F4.5	74.5582	69.3126	69.7303	393.784	400.983	382.588	79.536	77.1249	73.5857	28.8922	31.0518	29.1825	238.235	243.423	232.97	58.5135	60.2638	60.1793	53.7198	49.6609	49.8584	238.538	244.679	240.5	85.7292	90.8969	89.1946	T28F4.5	2.46102	0.108256	-1.26112	1.7413	-0.254395	-0.477767	1.75954	0.314736	3.52303e-33	1.01974e-29	0.00874675	0.0631884	9.89829e-22	1.95683e-19	2.50872e-12	1.6822e-10
WBGene00012187	rpb-11	37.5774	36.0732	41.8596	36.4255	37.695	36.3291	40.1163	24.7892	25.7923	25.5028	25.5193	27.5286	26.0878	26.0753	25.4964	26.9147	26.9645	29.0167	26.0015	24.4013	25.0552	25.2743	26.8572	22.6822	28.3689	28.9137	28.1398	rpb-11	-0.0626223	-0.376312	-0.55055	-0.568231	-0.472736	-0.608194	-0.618798	-0.431749	0.501936	0.587645	0.000465463	0.0123227	6.70372e-06	4.65136e-05	1.33231e-06	1.82048e-05
WBGene00012201	W02B12.1	21.6325	22.4537	21.0159	13.5227	14.2695	14.0675	21.9611	19.638	21.4408	9.16801	11.3614	11.1304	6.90147	6.76435	7.99425	19.4714	20.9377	19.1502	16.5895	15.7432	15.8566	11.1543	10.7173	11.1896	18.9309	18.0208	18.936	W02B12.1	-0.638532	-0.0475004	-1.04348	-1.59601	-0.12822	-0.43158	-0.978811	-0.219768	5.52516e-11	5.5853e-10	0.406725	0.647976	5.748e-15	2.98879e-13	8.55682e-08	1.84147e-06
WBGene00012211	ssp-37	6.85958	7.65407	7.0867	0.623883	0.481012	0.481012	7.2828	5.58637	4.39285	2.50403	3.48556	2.99051	0.542482	0.443556	0.59979	4.09664	3.623	3.54658	2.2097	2.33053	1.91808	0.377175	0.721714	0.467086	3.11084	2.82008	2.59266	ssp-37	-3.74794	-0.337605	-1.27126	-3.76915	-0.943991	-1.73871	-3.81248	-1.33755	6.34115e-11	6.35102e-10	0.00544653	0.0472259	2.41124e-09	4.38034e-08	4.91713e-11	2.39204e-09
WBGene00012212	W02D9.6	14.565	16.4719	16.7826	59.8684	57.9379	60.3209	15.6424	16.2905	15.2171	10.8853	12.3011	9.72257	56.1077	53.6861	55.8802	11.5584	10.201	11.1878	11.07	9.70842	10.8441	46.7365	45.9785	44.7214	12.3875	10.5333	11.0595	W02D9.6	1.90404	-0.0141209	-0.546179	1.79867	-0.537108	-0.589786	1.53053	-0.491482	2.00905e-23	1.71035e-21	0.837416	0.925977	8.31576e-08	1.03305e-06	1.76839e-08	4.69597e-07
WBGene00012213	W02D9.7	70.4704	72.8567	74.9517	18.5027	20.3041	20.3783	74.2821	66.7602	68.0388	41.7762	48.7759	40.6169	23.887	22.2122	23.1597	51.3594	47.8728	45.7861	28.8017	30.3347	30.0446	25.3911	23.2055	21.6592	37.1495	33.969	34.0012	W02D9.7	-1.88959	-0.0622748	-0.741899	-1.65845	-0.595309	-1.29414	-1.63581	-1.05566	8.78707e-22	5.54928e-20	0.24075	0.483588	1.81524e-13	7.29752e-12	8.81262e-19	1.93733e-16
WBGene00012216	W02D9.10	11.3367	12.0826	13.1642	12.8265	12.8754	13.4663	12.4652	8.64852	8.71316	7.66442	7.95848	8.0062	9.46986	10.0104	9.61638	9.36045	8.19383	8.90284	7.71171	6.82519	7.89515	8.42958	8.54055	7.99425	8.47553	8.45043	7.62266	W02D9.10	0.101347	-0.306297	-0.624359	-0.325291	-0.468062	-0.699056	-0.543145	-0.571089	0.239351	0.320543	0.0018106	0.0244825	6.05467e-07	5.74912e-06	8.15284e-08	1.76547e-06
WBGene00012217	W02H3.1	6.06226	7.26174	7.00902	0.97068	0.872637	0.780507	6.82962	6.41824	7.21615	4.8445	4.48277	4.60991	1.59382	1.2246	1.79919	1.40786	1.25229	1.15628	9.88195	8.74049	9.5354	1.29897	1.53418	1.03316	4.79015	5.31844	5.01419	W02H3.1	-2.94394	0.014303	-0.537226	-2.15811	-2.42249	0.481259	-2.38739	-0.418848	3.57684e-14	6.04859e-13	0.864249	0.938075	4.5255e-06	3.33592e-05	1.37338e-06	1.87071e-05
WBGene00012231	W04A4.2	29.4551	30.9135	29.4172	24.9144	24.3261	23.3299	32.133	34.9946	33.8608	10.6082	10.5725	10.6289	23.4976	24.0934	24.8521	15.3132	14.816	15.1683	14.3417	13.1854	14.3445	27.6711	28.5765	32.6789	18.2676	15.2183	17.8877	W04A4.2	-0.305161	0.169961	-1.49816	-0.309899	-0.988081	-1.0995	-0.0226346	-0.811194	8.40225e-06	3.47764e-05	0.00313155	0.0336962	1.77676e-18	1.91658e-16	2.87903e-16	4.16667e-14
WBGene00012251	clec-49	24.859	22.8331	27.2331	7.83207	7.55527	8.18251	23.4545	21.3896	18.444	6.70352	7.09759	6.66018	6.68673	5.97087	5.23531	6.41938	6.4967	6.87065	12.9108	14.6249	12.0334	7.68838	8.12378	7.03871	12.8828	14.4465	13.209	clec-49	-1.66175	-0.243023	-1.8651	-2.05947	-1.90932	-0.924044	-1.70076	-0.882809	1.84946e-16	4.57543e-15	0.00183806	0.0246883	8.54151e-17	6.33933e-15	4.11123e-12	2.59635e-10
WBGene00012253	clec-50	292.876	301.743	312.467	154.062	151.201	159.241	262.397	209.887	204.958	143.533	149.003	148.256	77.9508	81.488	81.1221	147.039	149.929	156.868	181.192	193.654	185.165	97.968	102.993	101.974	161.265	158.942	152.151	clec-50	-0.965067	-0.428213	-1.04015	-1.91412	-0.997361	-0.696359	-1.58176	-0.940684	6.24598e-17	1.70056e-15	5.07427e-09	5.2169e-06	1.23227e-17	1.13232e-15	1.48934e-13	1.32643e-11
WBGene00012268	W04G5.8	1.07869	0.819985	1.25903	3.05401	3.25742	3.47774	1.36511	1.18846	1.83989	0.609498	0.735531	0.506477	2.31361	2.50403	3.07979	0.511421	0.943338	0.663592	0.935404	0.98921	0.980287	3.71159	3.37794	3.52341	1.25337	1.17798	1.11114	W04G5.8	1.64462	0.454493	-0.790751	1.32342	-0.591085	-0.111712	1.76656	0.17885	7.13776e-10	6.07953e-09	0.0229887	0.116229	0.00441319	0.0129641	0.597883	0.719972
WBGene00012280	W05E10.1	5.02644	4.75988	5.02507	1.77256	1.65219	2.06303	5.10263	5.42748	4.70045	2.17851	2.46348	2.09726	1.43741	1.44118	1.60137	1.56801	1.15328	1.12962	3.92301	3.79568	4.74933	1.81817	1.70041	2.13595	2.88791	3.63347	3.51615	W05E10.1	-1.45263	0.0398437	-1.15297	-1.74393	-1.99829	-0.259496	-1.42059	-0.572486	2.2484e-11	2.41335e-10	0.66949	0.833969	7.69222e-10	1.53553e-08	0.0136075	0.0390873
WBGene00012300	W06D11.2	0.973983	1.0391	1.15628	0.514968	0.341222	0.567005	1.01645	0.67057	0.59979	0.479036	0.899233	0.629408	0.623883	0.651577	0.374208	0.511421	1.08335	0.628795	0.539892	0.708856	0.663592	0.525336	0.557617	0.346131	0.973362	1.13913	0.876408	W06D11.2	-1.15225	-0.482849	-0.687067	-0.944823	-0.54805	-0.731349	-1.12257	-0.0825839	0.000789084	0.00215438	0.0581751	0.206484	0.0168286	0.0406145	0.0104763	0.0315563
WBGene00012308	oac-53	0.913106	1.14883	0.851439	2.48025	1.99883	2.5241	1.26641	1.18846	1.38094	0.342374	0.240311	0.377175	0.94589	0.676254	0.571235	0.469577	0.539393	0.413184	0.786693	1.14768	0.733426	1.50609	2.79911	1.78164	0.760427	0.671813	0.766279	oac-53	1.28112	0.409481	-1.59749	-0.413596	-1.02754	-0.150524	1.04136	-0.390478	9.02465e-07	4.5403e-06	0.0676356	0.226981	0.000233949	0.00101575	0.534406	0.665832
WBGene00012312	W06G6.10	0.279805	0.269248	0.346131	0.049777	0.0866407	0.151511	0.212778	0.176446	0.34017	0.108754	0.112896	0.0661117	0.0432314	0.0293713	0.049777	0.204483	0.196961	0.0927874	0.231815	0.133009	0.0888273	0.052684	0.0899412	0.0180247	0.222487	0.241803	0.386511	W06G6.10	-1.82739	-0.365021	-1.70604	-2.94258	-0.979966	-1.07394	-2.74999	-0.116175	0.00176635	0.00445035	0.339059	0.584847	0.00308231	0.00948952	0.0234035	0.0613563
WBGene00012325	W07A12.8	2.42996	3.07851	2.92311	0.236835	0.11646	0.178866	2.49316	2.75204	2.67642	0.918312	1.0391	0.781823	0.28854	0.204483	0.192078	0.698364	0.507819	0.793842	1.28401	1.14768	1.67381	0.204483	0.0899412	0.140385	1.50287	1.52847	1.24967	W07A12.8	-4.0182	-0.0778077	-1.62836	-3.63279	-2.08599	-1.04198	-4.35452	-0.967992	1.44655e-09	1.16631e-08	0.52738	0.737024	7.22167e-09	1.17323e-07	4.16853e-07	7.06981e-06
WBGene00012329	sre-44	0.786693	0.924219	0.920663	1.24735	1.57443	1.18946	0.876408	0.537469	0.934651	0.240311	0.407267	0.258512	0.807674	0.754237	0.841534	0.547709	0.409693	0.334011	0.669264	0.867561	0.44667	1.43741	1.76428	1.45425	0.973362	0.636929	0.942246	sre-44	0.607797	-0.210981	-1.60938	-0.128962	-1.09649	-0.466268	0.837704	-0.0662415	0.00649969	0.0142525	0.371368	0.615885	0.000123632	0.000581716	0.0744857	0.15457
WBGene00012330	zip-3	51.81	53.8076	52.0683	15.1167	14.205	15.0342	54.3975	49.701	47.8447	36.9065	35.882	37.1048	17.1747	16.0431	14.9716	26.8389	27.3553	29.7079	56.4384	55.1779	56.2477	18.6915	19.0738	18.1395	46.8001	46.7851	43.1242	zip-3	-1.82416	-0.052997	-0.518609	-1.70602	-0.905239	0.0915741	-1.48984	-0.205317	4.18277e-23	3.34757e-21	0.236064	0.479429	9.84848e-12	2.95914e-10	0.0442604	0.102777
WBGene00012363	W09D10.5	7.34462	7.29044	7.47345	12.0097	10.8197	9.99593	7.5481	7.38707	7.55527	4.50968	4.97267	4.94326	9.27176	8.92779	9.30044	7.13063	6.88305	5.99562	4.89039	5.34974	4.40787	9.18501	9.23631	9.55317	6.44058	6.28329	6.42051	W09D10.5	0.572296	0.0241343	-0.616931	0.313944	-0.156461	-0.601522	0.337406	-0.208336	5.20748e-09	3.85335e-08	0.744702	0.874931	7.3273e-08	9.22125e-07	7.72552e-08	1.69192e-06
WBGene00012371	W09G3.8	9.28546	8.63804	8.79078	7.83207	7.75162	7.05273	9.43838	5.54717	6.46646	5.08114	6.25651	6.16627	6.60359	6.25459	7.06727	6.62107	6.46472	6.76015	5.89354	6.00416	6.27343	4.8151	6.82331	6.3679	6.48269	6.50173	6.20662	W09G3.8	-0.23871	-0.35041	-0.613181	-0.428098	-0.428822	-0.557954	-0.589191	-0.477632	0.0478677	0.081033	0.00546994	0.0473798	4.43022e-05	0.000237468	9.94635e-05	0.000650125
WBGene00012372	W09H1.1	1.07869	1.29609	1.49699	1.15263	0.898	0.915166	1.4	0.87529	0.934651	0.814351	0.470739	0.728255	1.17923	1.40056	0.751275	1.28401	0.782896	0.876408	0.97068	0.557617	0.980287	0.842509	1.24411	0.75067	0.973362	0.778434	0.662475	W09H1.1	-0.35555	-0.272672	-0.93809	-0.223512	-0.429025	-0.62015	-0.432743	-0.668739	0.15965	0.228107	0.260158	0.506919	0.00422067	0.0124724	0.0274763	0.0699269
WBGene00012404	Y6G8.2	11.1655	11.2642	11.0422	4.58203	5.65602	5.60074	10.9264	11.5329	11.6659	7.11575	6.37623	5.98594	5.21029	4.59756	4.57036	2.26852	2.81408	2.59059	9.96059	10.2876	10.1658	5.72209	5.2211	5.74391	8.02547	7.00205	8.70605	Y6G8.2	-1.09886	0.0263552	-0.791603	-1.22437	-2.12986	-0.139998	-1.01249	-0.505033	5.84166e-13	8.07097e-12	0.708111	0.855794	3.0313e-10	6.64713e-09	0.0626935	0.13502
WBGene00012407	Y7A5A.1	68.0388	69.5766	70.8747	28.4915	27.749	27.5579	64.8765	61.5664	64.7206	29.3888	30.6094	30.0687	20.3747	19.0913	18.1673	26.6501	25.1163	24.4756	42.8548	43.6764	43.2266	26.3924	26.0233	27.8803	39.124	39.6916	36.7597	Y7A5A.1	-1.3145	-0.125541	-1.2114	-1.85594	-1.45638	-0.684606	-1.38042	-0.851373	2.02102e-23	1.71215e-21	0.00144901	0.0217576	1.74265e-22	3.93276e-20	5.56162e-17	8.9434e-15
WBGene00012420	Y7A9D.1	3.1658	2.8015	3.17755	1.79789	1.43741	1.5609	3.47174	1.88892	2.46692	1.49699	2.09537	2.18456	1.71553	2.09289	1.63369	2.15933	2.08243	2.06303	1.54886	2.36751	1.98548	2.10436	2.02341	1.45425	2.39888	2.90064	1.43306	Y7A9D.1	-0.919365	-0.265981	-0.667244	-0.745467	-0.53496	-0.66652	-0.702423	-0.491027	0.000378871	0.0011141	0.168238	0.393773	0.00459956	0.0134343	0.00367262	0.013313
WBGene00012445	Y16B4A.2	228.188	228.904	213.206	45.9982	45.7945	45.1771	228.597	236.817	238.773	123.845	125.411	130.561	31.5787	32.4212	31.8707	107.974	110.167	107.321	189.606	187.142	189.798	38.4168	37.6713	39.8906	171.763	171.35	174.343	Y16B4A.2	-2.29001	0.0714098	-0.818439	-2.80496	-1.04165	-0.241672	-2.53257	-0.372678	2.22594e-32	3.86579e-29	0.0150123	0.0896863	4.9687e-22	1.03966e-19	2.40621e-09	8.03628e-08
WBGene00012452	Y17D7B.4	9.23738	8.68542	8.82207	7.58905	6.80156	7.62136	9.7621	8.02547	8.2861	4.56055	4.68195	4.84923	5.11617	6.12695	6.41577	5.59012	5.08491	4.64792	6.493	6.35694	5.99562	7.01127	7.17883	8.16362	8.15848	6.82085	7.59857	Y17D7B.4	-0.282811	-0.0413726	-0.927097	-0.610837	-0.820664	-0.506985	-0.271389	-0.250917	0.00264837	0.00639876	0.615914	0.80122	6.273e-10	1.28393e-08	4.74427e-06	5.17874e-05
WBGene00012457	acbp-6	2.94808	3.64021	3.8929	2.68755	2.18328	2.15718	3.59018	3.33316	3.09893	2.07529	2.02927	1.92449	2.06242	1.86496	1.91274	2.05374	1.63246	2.23478	2.45767	2.91745	2.78963	2.45579	1.95375	2.2947	2.5805	2.82008	3.55572	acbp-6	-0.558714	-0.047797	-0.787063	-0.830708	-0.820831	-0.356653	-0.640596	-0.227179	0.000312203	0.000933385	0.693343	0.846607	1.15377e-05	7.37489e-05	0.0100971	0.0306299
WBGene00012491	Y20C6A.1	5.64142	6.21947	5.61149	5.00525	5.00637	4.75435	5.52685	6.20287	6.51983	3.21686	4.00017	3.5254	5.56351	4.79243	4.93994	2.65996	2.10569	2.53442	4.94628	5.59615	4.90082	5.31344	5.85981	6.3679	4.86741	4.84184	5.17294	Y20C6A.1	-0.239602	0.0602835	-0.708967	-0.191625	-1.27622	-0.182274	-0.00218365	-0.229737	0.0131594	0.0264604	0.484505	0.709562	1.63695e-07	1.84484e-06	0.0516285	0.116174
WBGene00012526	Y32B12C.3	0.513777	0.744512	0.954048	0.129589	0.0866407	0.178866	1.08077	0.907391	1.60137	0.513777	0.20813	0.28854	0.14382	0.140385	0.133009	0.0176617	0.133009	0.334011	0.935404	0.746979	0.590267	0.167091	0.127199	0.176446	0.651577	0.778434	0.973362	Y32B12C.3	-2.46253	0.693367	-1.16809	-2.32458	-2.77975	0.0859617	-2.17299	0.153957	0.000753268	0.00206602	0.0244694	0.12083	0.0153153	0.0374183	0.79018	0.86641
WBGene00012556	mrps-10	23.1984	24.9057	26.6458	22.9737	21.4558	24.7716	23.996	15.9557	16.999	15.3204	16.0456	15.8386	15.6137	16.3237	15.4732	14.9299	17.2251	15.1286	16.6187	16.0566	16.2523	16.8751	17.599	15.4794	18.5532	15.8919	16.8437	mrps-10	-0.109747	-0.407766	-0.657457	-0.651073	-0.656306	-0.605062	-0.572938	-0.541953	0.215755	0.293884	9.5336e-05	0.00574976	1.96176e-07	2.15906e-06	5.51553e-07	8.86928e-06
WBGene00012557	Y37D8A.19	213.832	209.298	231.093	103.995	103.181	105.749	223.156	201.488	180.061	135.831	151.897	131.711	111.838	110.057	115.012	158.267	154.278	153.889	107.21	113.206	112.051	111.465	117.471	91.7809	131.627	119.791	110.89	Y37D8A.19	-1.06251	-0.116006	-0.643759	-0.956578	-0.487507	-0.97635	-1.02912	-0.854329	3.42475e-15	6.80522e-14	0.0835382	0.258301	2.58533e-10	5.7577e-09	2.42909e-14	2.57232e-12
WBGene00012582	clec-8	7.03523	7.23015	6.76822	8.76285	7.82006	8.75983	6.05369	7.18806	6.39273	2.47288	2.75204	2.52916	6.96514	6.32663	6.55928	2.15933	2.57357	2.23478	4.44593	4.48757	2.87052	8.36642	8.25755	7.28857	4.45767	4.69351	4.51513	clec-8	0.270004	-0.100379	-1.43335	-0.0829729	-1.58467	-0.853877	0.190634	-0.61836	0.00611388	0.0134831	0.3007	0.548688	4.51842e-11	1.17297e-09	3.50055e-08	8.59888e-07
WBGene00012602	Y38E10A.24	42.6094	40.8596	45.1836	32.133	32.0235	32.5594	45.5974	29.9549	28.5242	29.007	31.4645	29.8815	27.2888	25.4168	25.8664	34.2855	33.6486	31.2855	35.2454	28.1724	31.4988	27.0196	25.8397	20.6191	36.9895	35.6191	32.2708	Y38E10A.24	-0.409604	-0.331476	-0.507909	-0.708792	-0.376919	-0.43593	-0.802858	-0.294967	0.000501301	0.00142976	0.00306575	0.0332353	5.5528e-05	0.000288989	0.000273013	0.00150235
WBGene00012608	Y38F1A.6	207.149	205.058	204.958	51.0336	48.9343	47.8033	171.577	150.959	155.342	89.7093	93.7149	93.665	49.0391	48.757	50.5809	38.5163	41.1154	39.1315	123.749	135.688	127.638	58.3822	59.7134	53.042	135.615	115.322	125.518	Y38F1A.6	-2.06037	-0.370673	-1.1548	-2.05627	-2.37586	-0.675309	-1.84791	-0.716507	9.04145e-26	1.41462e-23	5.97908e-09	5.76881e-06	3.56076e-20	5.15331e-18	1.2054e-14	1.35511e-12
WBGene00012615	dct-16	734.378	698.077	716.909	784.733	775.575	778.187	740.657	784.733	737.463	340.731	366.668	291.251	551.315	567.275	595.635	337.628	317.37	344.919	636.709	618.58	601.897	737.463	764.314	921.334	611.626	626.84	622.893	dct-16	0.121613	0.0737975	-1.11563	-0.328001	-1.10563	-0.210995	0.162014	-0.207892	0.0403006	0.0701303	0.2023	0.437555	4.13039e-17	3.30564e-15	0.00102682	0.00461869
WBGene00012683	asp-17	8.33334	6.82029	7.60544	63.8222	65.1455	67.3265	8.47188	7.32338	8.38139	1.72157	2.24082	2.24082	10.6527	9.61988	9.08236	17.7095	17.0457	16.3149	4.40671	4.61939	5.19114	43.0258	43.7763	37.4871	12.0721	12.7828	12.1694	asp-17	3.10263	0.0818919	-1.87382	0.365054	1.15925	-0.68366	2.44734	0.700124	2.7303e-25	3.73364e-23	0.383353	0.627138	2.97186e-12	9.59338e-11	7.83439e-07	1.1821e-05
WBGene00012699	Y39B6A.41	2.19904	2.10641	1.95317	2.48025	2.49654	1.87083	1.99474	2.02224	2.13686	1.59382	1.45671	1.34248	1.79548	2.05506	1.79919	0.893399	1.4621	0.97925	2.42725	1.88424	2.09175	2.75568	2.30624	2.5241	1.46724	1.24103	1.38307	Y39B6A.41	0.125028	-0.0259994	-0.513357	-0.145816	-0.922077	0.0376671	0.274041	-0.612932	0.357069	0.445426	0.849108	0.931449	0.00281523	0.00877047	0.783827	0.861947
WBGene00012717	Y39E4B.6	44.9895	45.398	45.1836	71.6551	69.2639	72.3814	47.5388	43.2564	41.643	22.4422	24.5233	23.251	57.0358	58.3332	56.306	23.4651	22.1767	24.1722	31.8937	29.6384	29.302	56.0303	54.8577	50.4478	32.1426	35.0197	32.196	Y39E4B.6	0.65339	-0.0339204	-0.948044	0.340763	-0.955681	-0.57497	0.252958	-0.448021	1.14992e-14	2.10218e-13	0.477741	0.705077	1.63899e-16	1.16181e-14	5.57233e-12	3.36023e-10
WBGene00012720	Y39E4B.11	2.10436	1.93159	2.35979	3.11141	2.68119	2.8391	2.06512	1.36565	1.458	1.72157	1.52494	1.2777	1.37628	1.15263	1.73917	1.40786	1.43259	1.53769	1.64279	2.05656	1.44902	1.94926	1.79983	1.41213	1.5475	1.52847	1.704	Y39E4B.11	0.43721	-0.403767	-0.51589	-0.611533	-0.539381	-0.332619	-0.303116	-0.42009	0.00394809	0.00916052	0.0176129	0.0989913	0.0053101	0.0151753	0.0465839	0.107084
WBGene00012722	Y39G8B.1	66.5559	69.942	71.9755	136.295	144.883	134.437	70.6893	46.7851	50.5424	41.1361	43.1714	42.0717	77.9988	75.8392	75.478	51.0075	54.8934	50.7617	45.0472	46.5845	45.7185	82.9979	82.1863	74.6212	53.8295	54.101	51.1798	Y39G8B.1	0.9953	-0.330868	-0.720243	0.138948	-0.410825	-0.60097	0.20481	-0.388218	5.06415e-14	8.25039e-13	0.000248444	0.00929279	2.59127e-09	4.66048e-08	5.46768e-08	1.26942e-06
WBGene00012727	Y39G8B.7	0.431352	0.559924	0.413184	0.100299	0.0866407	0.0169575	0.378342	0.341222	0.34017	0.240311	0.274186	0.19592	0.0162814	0.0293713	0.192078	0.236835	0.284702	0.270359	0.324738	0.439527	0.37194	0.052684	0.052684	0.0562908	0.324738	0.278511	0.423735	Y39G8B.7	-3.12273	-0.388224	-0.993686	-3.42727	-0.809062	-0.310912	-3.13378	-0.460111	6.58962e-05	0.000226438	0.235359	0.478827	0.0149662	0.0366857	0.337983	0.481594
WBGene00012738	eif-3.J	75.2022	80.1597	84.7263	57.4691	58.3249	66.8671	83.8379	56.63	56.8168	48.9684	46.3109	51.7383	42.5262	39.124	37.6644	50.343	46.4096	50.2129	46.3505	49.2874	49.1471	42.9212	41.3274	37.6393	49.8947	51.3922	48.8322	eif-3.J	-0.397133	-0.302413	-0.704091	-1.00621	-0.706688	-0.728728	-0.97256	-0.674463	0.000101335	0.000334833	0.00158589	0.0228946	2.3695e-08	3.4085e-07	1.05219e-08	2.96165e-07
WBGene00012747	Y40H7A.10	63.3695	63.6749	63.2655	13.1317	11.5894	13.5339	63.7957	64.9943	64.9545	11.4974	12.415	11.4842	6.96514	7.50298	7.62992	14.7095	14.48	14.145	34.4874	34.9578	32.2474	15.4577	15.6164	17.6313	38.3064	39.4865	41.9539	Y40H7A.10	-2.31919	0.0256352	-2.43227	-3.11319	-2.13941	-0.90585	-1.97715	-0.670315	3.82736e-26	6.64697e-24	0.51286	0.728199	4.73471e-26	2.74092e-23	1.17313e-18	2.54672e-16
WBGene00012777	lact-8	5.77598	6.76723	5.86536	2.60703	2.55082	2.12492	5.21625	6.15166	6.95536	4.10344	3.55644	3.88353	2.85137	3.14175	2.77091	3.85381	3.27637	3.75432	4.16073	6.26269	5.90034	3.50405	3.26014	3.75432	5.6139	5.56351	6.35975	lact-8	-1.34389	-0.0155542	-0.674847	-1.07216	-0.76465	-0.207554	-0.818177	-0.0666471	1.85154e-09	1.46162e-08	0.888863	0.950254	1.69743e-05	0.0001038	0.0823321	0.166787
WBGene00012782	Y43C5A.2	93.436	98.1826	92.5853	55.8215	52.8181	51.4902	91.876	81.7813	81.5325	61.417	63.0603	59.4675	42.3391	44.2811	41.4675	65.4309	66.1309	60.9239	79.5739	83.0103	83.3306	41.2787	41.1552	42.7518	68.5397	68.722	70.1993	Y43C5A.2	-0.825807	-0.155602	-0.628076	-1.14866	-0.563988	-0.208981	-1.18378	-0.453285	1.5762e-17	4.73595e-16	0.000674421	0.0147181	1.25028e-14	6.11652e-13	2.20516e-05	0.000182714
WBGene00012808	Y43F8A.1	0.482202	0.481012	0.513777	0.269248	0.594923	0.513777	0.646365	0.404605	0.484815	0.240311	0.240311	0.258512	0.597377	0.520555	0.431352	0.312325	0.346131	0.381028	0.44916	0.252514	0.34017	0.559924	0.341222	0.513777	0.760427	0.44407	0.423735	Y43F8A.1	-0.213804	0.0320129	-0.997753	0.0636854	-0.500978	-0.520127	-0.103911	0.0885226	0.474079	0.56254	0.909765	0.960947	0.011169	0.0285463	0.115935	0.21734
WBGene00012810	nceh-1	4.87939	5.16976	5.0789	14.0396	14.3368	14.225	5.10263	3.97528	4.60126	2.61322	2.30401	2.37327	7.72925	7.29573	7.16621	3.03323	2.69601	2.71647	3.65073	3.28725	4.23247	8.47426	8.76765	9.15661	3.75793	3.66831	3.11507	nceh-1	1.49711	-0.151632	-1.05792	0.555793	-0.850445	-0.44228	0.802534	-0.523542	1.52185e-17	4.59652e-16	0.10589	0.298618	9.43062e-10	1.84024e-08	0.000100564	0.000655356
WBGene00012821	Y43F8B.11	1.64279	2.21852	2.45629	1.95476	2.21099	1.62378	2.45944	1.74784	1.52738	1.55997	1.21651	1.37319	1.56274	1.94853	1.43741	1.56801	1.94727	1.97225	1.54886	1.79789	2.17084	1.77533	1.87698	2.18328	1.70091	1.55997	2.14845	Y43F8B.11	-0.10573	-0.128921	-0.58428	-0.327444	-0.166595	-0.188844	-0.100401	-0.211453	0.554428	0.636864	0.46901	0.698748	0.00762885	0.0206211	0.302758	0.445103
WBGene00012834	Y43F8C.13	37.36	41.013	39.185	30.2787	31.2933	29.528	39.3129	35.3265	34.8175	25.5907	25.9675	25.785	22.1541	20.4836	19.6934	45.0925	43.4812	42.9157	29.869	29.3406	28.9032	23.7192	23.9227	23.1411	40.2282	39.8797	39.3339	Y43F8C.13	-0.365503	-0.100843	-0.601156	-0.91281	0.162232	-0.412561	-0.727891	0.0257364	1.00658e-08	7.11488e-08	0.0293489	0.135164	5.10812e-13	1.8835e-11	1.00992e-09	3.70808e-08
WBGene00012866	Y45F10A.3	5.3207	5.59844	5.28251	8.95052	9.64002	8.86419	4.55092	4.8445	4.96889	3.12004	2.63932	3.32169	7.5457	8.22276	7.26291	3.35966	3.623	3.40534	4.37655	4.18243	4.56376	8.24832	8.32718	8.41121	5.10713	3.63347	4.07501	Y45F10A.3	0.760185	-0.174334	-0.833814	0.509645	-0.637907	-0.301541	0.626028	-0.351892	5.30189e-10	4.6062e-09	0.0681701	0.227705	3.48062e-08	4.79366e-07	0.00380384	0.0137227
WBGene00012880	Y45F10C.4	64.3533	66.3417	61.1848	58.8497	61.2056	56.0398	70.2869	61.1913	59.2403	44.2811	44.7445	42.5913	53.0898	50.5359	54.0603	42.3066	45.4406	44.9291	48.7289	44.9453	49.3049	54.8021	50.6977	52.4856	52.7326	47.5794	55.9833	Y45F10C.4	-0.123187	-0.00963364	-0.543529	-0.283127	-0.52899	-0.422352	-0.279566	-0.298705	0.0350117	0.0621281	0.861554	0.936797	5.10397e-10	1.06284e-08	5.08354e-08	1.18824e-06
WBGene00012883	Y45F10D.2	1.04747	1.07489	1.43741	0.819985	0.996025	0.884456	1.15263	1.46864	1.27082	0.777282	0.629408	0.781823	0.569914	0.877423	0.628795	0.814351	0.314909	0.567005	0.669264	1.10134	1.12898	0.559924	0.447775	0.872637	0.684565	0.814351	0.766279	Y45F10D.2	-0.404417	0.139089	-0.707918	-0.798698	-1.21772	-0.353746	-1.0233	-0.652284	0.0897643	0.139552	0.500526	0.719708	0.0103004	0.0266097	0.130331	0.237984
WBGene00012916	Y46G5A.28	1.70849	1.52793	2.01582	0.819985	0.841534	1.0047	1.76935	1.85052	1.42184	1.08663	1.21651	1.05985	1.71553	1.37319	1.35523	1.23973	0.973362	1.30085	1.22091	1.79789	1.52607	1.53769	1.17673	1.49591	2.02119	2.0146	1.92566	Y46G5A.28	-0.990337	-0.0548802	-0.647402	-0.242946	-0.589382	-0.239966	-0.333641	0.189378	1.71575e-05	6.67056e-05	0.714344	0.859261	0.00105316	0.00371149	0.134558	0.244161
WBGene00012924	Y47D3A.5	1.77533	1.89832	1.85052	1.5772	1.62518	1.38094	1.4	0.706068	1.08916	0.777282	0.698364	0.753274	0.922903	0.936158	1.21588	0.973983	0.943338	0.97925	1.04014	1.22091	1.0519	0.94589	1.07489	1.15016	1.08565	1.24103	0.698364	Y47D3A.5	-0.268885	-0.848809	-1.31438	-0.866459	-0.933594	-0.748907	-0.815094	-0.904269	0.112308	0.169281	0.000103396	0.00596569	4.24297e-06	3.1477e-05	0.000398234	0.00206822
WBGene00012931	Y47D3A.20	8.00026	7.35905	7.23959	7.4949	8.01254	7.08424	9.08593	3.91023	4.53937	4.24684	4.1398	4.29977	5.88442	5.39183	4.57036	4.6781	5.41918	4.57036	4.68284	4.01807	4.82049	5.62508	5.77251	4.707	4.97142	5.53559	4.55917	Y47D3A.20	-0.00214998	-0.456298	-0.8239	-0.51086	-0.621483	-0.733743	-0.47832	-0.583487	0.988647	0.992048	0.00845068	0.0618992	0.000101059	0.000486851	0.0002413	0.00135532
WBGene00012947	Y47H9C.1	2.59059	3.18438	3.24286	3.59791	2.8657	3.27753	3.21571	2.48479	2.39888	0.951955	1.11181	1.02855	4.21243	4.34588	4.4201	3.35966	4.00637	3.21686	1.74784	1.79789	1.35115	3.23644	3.33144	2.94346	4.26071	4.7654	3.72006	Y47H9C.1	0.126194	-0.14741	-1.52239	0.535919	0.237467	-0.871751	0.0957168	0.505994	0.32676	0.414011	0.270931	0.518485	4.634e-08	6.18116e-07	8.48663e-06	8.41732e-05
WBGene00013007	Y48E1B.8	35.3051	38.4713	38.7464	0.698364	1.10134	1.18946	36.6096	27.1747	28.2364	18.8255	19.4294	19.3352	0.896232	0.754237	0.721714	24.1782	22.9134	23.7371	19.7036	21.5348	21.4959	1.01875	1.46864	0.996025	24.7345	20.1605	23.3482	Y48E1B.8	-5.31356	-0.298016	-0.96482	-5.58877	-0.667489	-0.845586	-5.03941	-0.72592	2.21886e-15	4.57117e-14	0.000391531	0.0113518	4.93484e-12	1.5359e-10	4.16772e-11	2.07991e-09
WBGene00013008	clec-146	12.0114	12.5948	11.8747	39.4938	42.1654	41.3607	12.6164	9.79592	10.3965	8.35759	8.42958	7.05829	21.2187	19.6845	21.6876	8.92555	9.08052	10.3996	9.60888	8.74049	9.1324	18.2644	18.8771	21.7474	11.4658	11.6876	11.2235	clec-146	1.75483	-0.158284	-0.623538	0.778476	-0.356842	-0.405534	0.682051	-0.0840473	1.82347e-20	8.94583e-19	0.0648933	0.221198	2.42485e-07	2.59153e-06	7.02285e-05	0.000484954
WBGene00013013	clec-145	3.5317	3.47774	3.49582	5.95424	5.59615	5.89054	2.88791	2.97331	2.3629	1.82317	2.09537	1.96025	3.86272	4.01966	3.27372	2.39615	2.18583	2.61438	2.69481	2.40449	2.78963	4.74808	4.75059	4.5523	3.37081	3.14359	2.94995	clec-145	0.728728	-0.350927	-0.831742	0.0860696	-0.54164	-0.408605	0.420763	-0.151264	5.16361e-09	3.82252e-08	0.00189448	0.0250582	1.71983e-07	1.92914e-06	0.00058541	0.0028842
WBGene00013018	Y48G10A.1	82.2997	84.6482	81.2026	79.1034	77.772	83.2976	84.6308	66.0315	65.9806	55.8522	56.0978	59.7134	64.5769	60.6181	61.2132	56.9817	56.306	59.0318	60.7206	63.6427	63.5718	61.5367	62.0226	60.2048	66.4989	64.0477	62.8404	Y48G10A.1	-0.0475109	-0.203184	-0.53003	-0.412349	-0.524624	-0.401613	-0.431664	-0.359243	0.401264	0.490515	0.00115243	0.0193491	8.88059e-10	1.74863e-08	1.35213e-07	2.73369e-06
WBGene00013036	fbxa-218	2.08243	2.06303	2.53023	2.09849	2.35137	2.06303	2.88791	1.85052	1.87428	1.26689	2.20731	1.20791	1.90703	2.09289	1.5475	1.86386	1.40164	1.69306	1.90069	2.21743	2.36354	1.737	1.83989	2.18328	1.87428	1.77411	1.77937	fbxa-218	-0.035245	-0.0328375	-0.580354	-0.266133	-0.445415	-0.0517173	-0.22871	-0.294878	0.835467	0.87523	0.845018	0.929531	0.00590307	0.0165646	0.761682	0.846566
WBGene00013074	hmit-1.2	9.57062	10.391	10.3457	5.58947	6.31289	5.29685	12.0411	11.5989	10.6092	4.02125	3.74184	3.7027	6.782	6.08394	5.81416	3.10979	3.623	3.21686	7.25062	7.16377	6.69605	6.11198	5.38131	4.75719	8.18622	6.13192	7.90221	hmit-1.2	-0.817373	0.180278	-1.39786	-0.694401	-1.59893	-0.517008	-0.891437	-0.457737	3.50376e-09	2.67119e-08	0.0322281	0.143063	1.55585e-12	5.319e-11	4.18176e-06	4.67641e-05
WBGene00013076	Y51A2D.8	2.33623	1.70849	1.91524	0.646365	0.423735	0.915166	1.66622	2.09413	1.23253	1.04991	1.18521	1.15263	0.671813	0.492108	0.628795	1.28401	1.15328	1.48195	0.669264	0.867561	0.698364	0.44916	0.409693	0.346131	0.866587	0.879465	0.766279	Y51A2D.8	-1.63383	-0.269538	-0.803835	-1.72907	-0.597362	-1.41737	-2.2692	-1.23314	5.98913e-07	3.11044e-06	0.109915	0.305203	0.000319915	0.00132632	1.66157e-06	2.18279e-05
WBGene00013080	Y51A2D.13	27.036	28.4249	27.622	25.6459	25.9959	26.5646	30.7512	34.3035	33.7976	14.5307	15.9965	16.0208	22.9737	22.7463	22.3497	18.0011	17.6336	17.5918	20.6633	20.9159	20.9437	21.6841	22.7637	20.8993	25.7923	26.6501	26.4653	Y51A2D.13	-0.0869437	0.249469	-0.834529	-0.285863	-0.642262	-0.409306	-0.343325	-0.0731263	0.0595893	0.0979021	2.37541e-06	0.000589339	6.13345e-16	3.83164e-14	1.3842e-09	4.91603e-08
WBGene00013086	arrd-2	3.83687	3.5704	3.24286	1.44118	1.71902	1.50016	3.30239	3.22382	3.13819	2.47288	2.16449	1.85854	1.61495	2.00622	2.24082	2.35137	2.04643	2.09232	1.80196	2.68755	2.4346	2.23024	1.83989	2.05656	2.50723	2.43251	2.38351	arrd-2	-1.21572	-0.139789	-0.740164	-0.888409	-0.732686	-0.666281	-0.815089	-0.544452	1.02528e-08	7.23236e-08	0.2275	0.469622	7.28929e-06	4.99578e-05	1.77045e-05	0.000153968
WBGene00013100	zip-7	2.1354	1.60309	1.56801	0.819985	0.45035	0.684565	2.45944	1.98548	1.52738	1.01645	1.0391	1.20791	1.09473	1.01875	1.03084	1.60723	1.25229	1.94486	1.22091	1.25552	1.52607	1.05608	1.17673	0.669264	1.87428	1.37149	1.43306	zip-7	-1.41836	0.160553	-0.673623	-0.732329	-0.147948	-0.400765	-0.846147	-0.186731	2.69494e-05	0.000100912	0.374669	0.618582	0.00554143	0.0157457	0.0575957	0.126296
WBGene00013101	Y51H4A.5	1.84833	1.56669	2.01582	0.347299	0.204483	0.308848	1.4	1.25609	1.12688	0.342374	0.240311	0.0957236	0.0654893	0.0293713	0.133009	0.27634	0.133009	0.240311	0.59979	0.594923	0.549909	0.236835	0.234285	0.0957236	0.795519	0.814351	0.662475	Y51H4A.5	-2.66597	-0.517574	-3.20444	-4.83487	-3.12861	-1.62989	-3.31698	-1.25434	1.4296e-07	8.35957e-07	0.0074695	0.0576665	1.54591e-07	1.75861e-06	1.17838e-06	1.6504e-05
WBGene00013125	clec-92	0.816639	0.819985	0.615502	0.269248	0.052684	0.27634	0.573975	0.842509	0.567005	0.44407	0.341222	0.409693	0.12278	0.312969	0.192078	0.589691	0.567005	0.507819	0.386511	0.133009	0.37194	0.125671	0.165854	0.140385	0.324738	0.209236	0.211465	clec-92	-2.16873	-0.185276	-0.891724	-1.8969	-0.426463	-1.41535	-2.3308	-1.5888	0.000211691	0.00065452	0.512323	0.727948	0.0169034	0.0407724	0.0016585	0.00688083
WBGene00013127	Y52B11A.8	54.8577	58.5661	62.8526	56.7977	57.2525	59.6296	59.1817	29.7438	28.2364	31.5871	26.8093	34.08	34.3423	34.6838	32.964	31.8973	33.0754	34.6718	34.6607	32.0509	33.3715	34.4874	32.756	29.0797	36.1308	35.0666	33.2799	Y52B11A.8	-0.0187951	-0.661786	-0.926274	-0.782626	-0.813977	-0.808527	-0.862015	-0.749261	0.883623	0.912631	3.97267e-05	0.00401124	6.48501e-07	6.11097e-06	3.49444e-06	4.01739e-05
WBGene00013141	Y53C12A.6	3.2262	2.18328	3.15201	2.24441	2.15933	1.70285	3.14418	2.448	2.3629	1.98548	1.42184	1.66143	1.96439	2.10828	1.60137	1.86386	2.21743	2.64805	1.90069	2.56394	2.32654	1.94926	2.55553	2.40223	2.23362	2.49546	2.76428	Y53C12A.6	-0.473276	-0.10062	-0.749676	-0.57854	-0.32695	-0.343859	-0.305646	-0.186899	0.0100136	0.0208571	0.522995	0.734424	0.000466828	0.00182846	0.0471759	0.10813
WBGene00013157	Y53F4B.10	0.545169	0.481012	0.754237	0.236835	0.287354	0.392683	0.447775	0.47777	0.567005	0.311275	0.341222	0.19592	0.405182	0.443556	0.404605	0.427577	0.284702	0.356884	0.539892	0.785398	0.479036	0.44916	0.833198	0.953094	0.580219	0.573975	0.594923	Y53F4B.10	-1.00899	-0.253161	-1.13549	-0.496085	-0.766707	-0.00778014	0.254171	-0.00423744	0.00441324	0.0101141	0.352305	0.596925	0.0027218	0.00852716	0.976186	0.986602
WBGene00013179	clec-100	0.404605	0.23574	0.346131	0.0778796	0.0176617	0.0169575	0.511421	0.439527	0.412165	0.049777	0.0169575	0.0450267	0.0654893	0.0293713	0.0162814	0.129589	0.0162814	0.0468966	0.0728896	0.174276	0.0888273	0.052684	0.052684	0.140385	0.154068	0.115381	0.282599	clec-100	-3.55916	0.49025	-3.32393	-3.41754	-2.90838	-1.69134	-2.22697	-0.942109	0.000144621	0.000463231	0.17139	0.398517	0.000316078	0.00131341	0.00423577	0.014967
WBGene00013207	Y54G9A.4	2.75897	3.43712	3.07979	0.541228	0.45035	0.308848	3.2457	2.85849	3.24997	0.883033	1.38446	1.02855	0.314909	0.367495	0.312325	2.26852	2.21743	3.28111	1.86441	1.72157	1.80885	0.596149	0.409693	0.423735	3.52134	3.33787	3.30517	Y54G9A.4	-2.8116	0.0203073	-1.4952	-3.1755	-0.246956	-0.760854	-2.66925	0.143289	1.09141e-09	8.97044e-09	0.868311	0.939645	2.14179e-08	3.11528e-07	1.90187e-05	0.000162708
WBGene00013213	Y54G11A.2	49.6393	50.0922	48.3697	45.2371	46.2057	47.3538	50.5609	40.1839	36.1692	35.0097	34.098	35.1086	35.1821	36.0106	34.0686	35.4794	37.2484	35.8486	38.2097	37.327	35.698	34.8838	36.0993	33.2954	37.0986	37.1375	38.2609	Y54G11A.2	-0.0941969	-0.231754	-0.505324	-0.490927	-0.446215	-0.411442	-0.502736	-0.396147	0.14257	0.207302	0.000975037	0.0175922	2.66734e-08	3.78462e-07	7.1896e-07	1.09914e-05
WBGene00013233	sdz-33	1.99152	2.15096	1.71902	0.892127	0.917178	0.748237	2.35137	1.66905	2.39888	1.26689	1.21651	0.87529	1.1227	1.17923	1.37969	1.64961	1.43259	1.56849	1.51896	1.56565	1.28112	1.25903	1.27358	1.3772	1.63246	1.69779	2.0687	sdz-33	-1.20387	0.114792	-0.838396	-0.680511	-0.336595	-0.426705	-0.591013	-0.121459	1.59611e-06	7.65947e-06	0.416603	0.655536	7.45902e-05	0.00037364	0.0117116	0.0345909
WBGene00013234	fbxb-24	1.25092	1.97387	1.19181	1.28798	1.04794	1.302	1.70041	1.36565	1.76428	0.918312	1.38446	0.698364	1.34749	1.2246	1.0047	1.37082	1.36952	1.18797	1.22091	0.98921	1.12898	1.19002	1.24411	1.53418	1.35842	1.65808	1.96177	fbxb-24	-0.232965	0.16977	-0.590567	-0.258434	-0.129542	-0.352338	-0.128928	0.209964	0.266353	0.349826	0.373372	0.617815	0.0154763	0.037755	0.107952	0.205819
WBGene00013257	Y57A10A.14	3.5658	3.43712	3.66544	2.09849	1.82806	1.5609	3.35966	4.17935	3.6722	2.53869	2.43144	2.52916	1.66024	1.73029	2.08912	2.05374	1.75499	1.91274	2.61322	2.56394	3.39665	1.81817	1.60137	1.6095	2.77192	3.07133	2.89427	Y57A10A.14	-0.957936	0.0656239	-0.50816	-0.974325	-0.907256	-0.329675	-1.08387	-0.289051	6.87324e-08	4.23289e-07	0.526666	0.736687	0.000202211	0.000891341	0.0063702	0.0210006
WBGene00013278	Y57A10B.6	1.32637	1.49143	1.67735	1.1086	0.872637	1.24867	1.18634	1.36565	1.49143	0.814351	0.698364	0.87529	1.4621	1.32867	1.37969	1.86386	1.72157	1.21588	1.28401	1.14768	1.24336	1.3772	1.63369	1.45425	1.94998	1.43608	1.15016	Y57A10B.6	-0.483102	-0.155658	-0.909797	-0.100188	0.0577014	-0.279533	-0.00267675	-0.00815916	0.018585	0.0357709	0.384429	0.628364	0.000383866	0.00154929	0.140801	0.252847
WBGene00013280	Y57A10C.1	0.609498	0.851439	1.02375	0.236835	0.312325	0.366258	0.876408	0.942246	1.19437	0.479036	0.439527	0.439527	0.376178	0.367495	0.513777	0.851439	0.75067	0.663592	0.63562	0.67057	0.409693	0.236835	0.51895	0.306282	0.795519	0.778434	0.842509	Y57A10C.1	-1.46437	0.301774	-0.849036	-0.983695	-0.116471	-0.532324	-1.28203	0.000838344	8.78881e-05	0.000294606	0.149384	0.366692	0.00446496	0.013094	0.0392364	0.093409
WBGene00013284	daf-22	71.2381	71.9257	68.2283	107.922	110.956	112.907	71.6551	65.6744	62.8139	44.4612	49.2959	47.2583	60.0104	59.0456	57.4627	34.717	35.4705	34.5306	57.013	58.1492	60.6711	72.5576	71.8248	67.3744	51.1168	50.2851	48.5785	daf-22	0.649741	-0.0789261	-0.584205	-0.259158	-1.01238	-0.2662	0.00443149	-0.494511	7.20398e-16	1.61852e-14	0.069526	0.230695	1.85456e-13	7.42122e-12	1.00561e-06	1.44448e-05
WBGene00013297	Y57G11B.5	188.467	182.255	178.655	80.1597	76.9477	79.9681	187.225	186.994	190.07	74.3092	77.5974	73.9576	64.3844	64.1948	67.765	84.2895	76.3819	78.3599	53.2201	55.3065	54.7944	66.0527	70.7487	78.5467	70.9032	63.803	67.0744	Y57G11B.5	-1.21333	0.0383934	-1.28441	-1.48699	-1.20538	-1.75299	-1.36032	-1.44783	3.34145e-22	2.24926e-20	0.333175	0.579871	1.15507e-22	2.67467e-20	9.33203e-26	1.15764e-22
WBGene00013364	Y60A3A.16	2.08243	1.74784	2.21743	2.30624	2.13118	2.65478	1.73574	1.53356	1.42184	1.08663	0.963501	0.973362	1.59382	1.49699	1.43741	2.39615	2.69601	2.99808	1.32684	1.68088	1.44902	1.53769	1.87698	1.70285	1.66905	2.2947	2.92188	Y60A3A.16	0.223379	-0.363305	-0.997878	-0.413593	0.427337	-0.453754	-0.241372	0.148499	0.148232	0.214172	0.0376202	0.156769	4.92175e-05	0.000260439	0.0138204	0.039581
WBGene00013366	Y60A3A.21	11.562	12.3293	12.415	10.4348	11.3219	10.9174	12.8574	7.68482	8.25067	7.97053	7.66331	7.66331	8.97288	7.56357	7.44254	8.01254	9.23973	9.83377	8.25349	8.2861	7.47671	7.71988	7.31807	7.52564	8.79078	8.03086	7.78131	Y60A3A.21	-0.1523	-0.364259	-0.635998	-0.5977	-0.413581	-0.592533	-0.681108	-0.559008	0.160384	0.229005	0.00226736	0.0276914	9.47969e-06	6.24559e-05	1.80813e-05	0.000156432
WBGene00013391	Y62H9A.3	68.864	65.6973	71.044	4.28691	3.76454	3.67409	69.7631	63.853	60.065	37.2618	39.1113	38.5749	9.95396	10.1509	10.1215	42.9947	43.6826	42.543	35.8992	34.0216	37.695	15.2695	14.0098	14.7892	45.5272	44.319	42.3066	Y62H9A.3	-4.11972	-0.0869145	-0.837818	-2.76176	-0.669493	-0.933106	-2.21994	-0.6374	3.62436e-25	4.66254e-23	0.0520587	0.192363	9.67325e-17	7.14874e-15	6.31666e-18	1.2189e-15
WBGene00013392	Y62H9A.4	67.7716	68.8495	69.7908	5.25823	5.04298	4.93994	71.9122	69.9228	70.0458	40.0506	43.6407	38.3286	11.7811	12.4847	13.6698	44.319	42.9212	42.9157	38.0592	37.6866	40.4891	18.9678	18.6218	18.7131	46.8799	42.4558	46.6492	Y62H9A.4	-3.76243	0.0381288	-0.762838	-2.45126	-0.666901	-0.829675	-1.87586	-0.604218	1.75531e-26	3.50395e-24	0.343502	0.588626	1.34367e-16	9.64277e-15	1.46892e-17	2.65738e-15
WBGene00013393	Y62H9A.5	286.909	302.279	299.357	110.346	110.527	107.516	307.365	280.841	288.526	172.017	181.023	160.222	108.896	105.068	107.744	196.472	182.887	199.092	131.669	128.699	132.145	109.533	117.551	102.229	163.188	154.355	156.502	Y62H9A.5	-1.43485	-0.0191991	-0.793811	-1.46497	-0.619387	-1.17746	-1.43062	-0.905891	6.75199e-24	6.31278e-22	0.633436	0.811893	1.6713e-17	1.48848e-15	8.35285e-22	3.53814e-19
WBGene00013394	Y62H9A.6	310.96	303.982	306.04	103.28	94.5712	97.1661	315.324	321.656	328.317	196.472	210.918	201.864	109.142	110.315	112.809	226.855	219.257	216.035	153.35	147.61	147.819	119.759	119.666	132.581	182.776	160.184	183.984	Y62H9A.6	-1.64245	0.0670853	-0.59718	-1.47178	-0.477629	-1.03718	-1.31244	-0.809291	1.54866e-25	2.27929e-23	0.0947499	0.278383	1.00981e-14	5.08331e-13	1.06871e-20	3.04267e-18
WBGene00013418	Y65A5A.1	3.07979	3.07851	2.92311	1.04124	1.12824	1.302	2.74156	2.448	2.50531	2.36751	1.52494	2.02224	1.53086	1.75499	1.51896	2.62147	2.10569	2.47919	2.00031	2.21743	1.77411	1.53769	1.53418	2.18328	2.26581	2.36075	2.14845	Y65A5A.1	-1.41248	-0.24093	-0.644964	-0.924619	-0.34787	-0.612906	-0.837413	-0.424889	5.06959e-09	3.7618e-08	0.0551416	0.199634	6.65288e-05	0.00033764	8.56574e-05	0.000573482
WBGene00013432	Y66D12A.6	9.06194	8.99168	9.78898	10.1571	9.49846	11.7496	9.60384	7.45619	5.18167	5.71832	6.0325	7.03649	7.17414	8.02075	6.37066	6.96688	7.09759	6.1416	6.5925	7.43875	5.99562	7.56611	8.03086	6.81301	6.29116	6.96688	5.61644	Y66D12A.6	0.166809	-0.351425	-0.561591	-0.366607	-0.466508	-0.479827	-0.304944	-0.560261	0.181197	0.253921	0.0121965	0.0777511	0.000444889	0.0017564	0.00147111	0.00622773
WBGene00013439	Y66D12A.13	11.1918	10.8784	10.8457	28.6403	30.4382	29.6183	9.92733	10.5761	10.6092	2.64851	2.16449	2.56394	13.6434	15.7669	14.2153	3.10979	3.00031	2.82535	5.34595	5.37821	5.29401	19.8829	20.5152	19.4258	7.24079	7.26345	7.19523	Y66D12A.13	1.42767	-0.0835334	-2.16186	0.404582	-1.88847	-1.03997	0.862828	-0.60169	1.04842e-21	6.47967e-20	0.170355	0.396909	3.4167e-18	3.47005e-16	2.48529e-14	2.61589e-12
WBGene00013448	Y66D12A.24	10.6655	9.75925	10.0659	11.7462	12.9846	12.3011	9.8899	9.54239	9.41211	6.04204	7.23713	8.32945	10.7062	10.3476	11.0952	9.93574	9.75265	9.34754	6.66518	7.35737	8.15052	11.7961	10.2075	10.0291	9.97756	10.0434	9.21471	Y66D12A.24	0.274996	-0.0806491	-0.502168	0.0731213	-0.0749124	-0.470265	0.0700646	-0.06216	0.00125422	0.00326862	0.320963	0.568097	4.54007e-06	3.34524e-05	8.34926e-06	8.30003e-05
WBGene00013457	paqr-3	2.42996	2.21852	2.32726	3.64146	4.55917	4.33344	2.92188	1.95476	2.54566	1.62518	1.45671	1.37319	3.80292	4.01966	3.85935	1.49143	1.79	1.35728	1.77533	1.37257	1.80885	4.42398	3.84904	4.3306	1.94998	1.80885	1.53769	paqr-3	0.829475	0.0664049	-0.65961	0.743861	-0.605068	-0.498082	0.847113	-0.405438	4.05251e-07	2.17962e-06	0.631503	0.811071	0.000488942	0.0019052	0.00369985	0.0133904
WBGene00013481	Y69H2.3	231.613	248.059	248.841	212.98	227.732	236.817	263.413	207.149	210.716	162.429	172.67	170.448	139.267	130.747	130.149	190.07	189.128	197.873	132.899	143.943	137.146	128.94	142.237	120.168	164.872	153.606	138.479	Y69H2.3	-0.10597	-0.102774	-0.525716	-0.863122	-0.334234	-0.815668	-0.895421	-0.674527	0.113389	0.170629	0.122851	0.327155	1.42516e-08	2.17685e-07	1.35935e-12	9.55786e-11
WBGene00013484	Y69H2.9	5.50015	5.57176	5.0789	3.1689	2.78785	3.03662	5.58882	4.65396	4.80621	0.951955	0.665602	0.439527	1.96439	1.83923	1.9425	0.236835	0.782896	0.628795	2.2097	2.52916	2.28996	3.0996	2.66749	3.1907	2.02119	1.62107	1.38307	Y69H2.9	-0.838623	-0.102663	-3.05241	-1.48657	-3.38055	-1.20288	-0.856251	-1.69344	8.54289e-07	4.31668e-06	0.366058	0.61028	9.88795e-11	2.38837e-09	8.52782e-09	2.4725e-07
WBGene00013527	Y73F8A.22	0.196961	0.23574	0.212778	0.049777	0.052684	0.0169575	0.12126	0.240311	0.201717	0.0808829	0.049777	0.0661117	0.0654893	0.0866407	0.0162814	0.169382	0.284702	0.123353	0.0488441	0.174276	0.18888	0.052684	0.0169575	0.0180247	0.12278	0.084508	0.142487	Y73F8A.22	-2.60609	-0.252841	-1.75075	-2.23275	-0.250529	-0.92502	-3.10984	-0.92132	0.00176702	0.00445137	0.574788	0.771433	0.00977288	0.025469	0.0803556	0.163661
WBGene00013542	lron-12	3.30239	2.70165	2.66549	2.09849	2.21099	2.32064	3.83866	3.04271	2.85923	2.07529	2.24082	1.82806	2.26339	2.06656	2.41918	2.30745	2.60803	2.59059	2.29954	2.40449	2.60753	2.02119	2.16391	2.2947	2.61968	2.11827	2.72942	lron-12	-0.391339	0.1633	-0.507592	-0.367341	-0.201914	-0.2499	-0.426518	-0.225921	0.00515528	0.0115869	0.166233	0.39124	0.000839248	0.00305112	0.0558962	0.123379
WBGene00013556	Y75B8A.23	6.03366	5.54253	4.90654	8.16362	8.5816	7.64769	5.73318	4.11932	4.08697	3.86622	3.11199	3.29092	5.28979	5.52511	5.81416	3.5578	3.48817	3.40534	4.07742	4.32071	3.73262	7.1168	5.47748	5.31558	4.2065	4.36789	4.30813	Y75B8A.23	0.566302	-0.251037	-0.685591	0.0129642	-0.654865	-0.441727	0.117896	-0.351825	5.40781e-06	2.32527e-05	0.03405	0.147578	1.09848e-05	7.08142e-05	0.000889052	0.00410206
WBGene00013562	Y75B8A.32	2.53442	2.0193	2.73936	5.15952	5.04298	4.87939	2.15096	2.25894	2.10008	1.43259	1.49143	1.80048	3.41996	3.43118	3.05949	2.09113	2.15842	2.02485	1.77533	2.01088	1.91808	4.17873	3.67156	3.85019	1.91274	1.77411	2.31936	Y75B8A.32	1.05159	-0.15737	-0.617097	0.447105	-0.212682	-0.355294	0.68401	-0.286624	9.5895e-11	9.35026e-10	0.201087	0.435989	0.000137245	0.000635439	0.00939081	0.0288502
WBGene00013575	acs-5	104.909	110.527	108.574	44.9989	43.7763	46.743	108.896	102.33	103.615	62.6121	67.1709	66.8796	42.3391	41.798	42.2096	64.3771	62.3113	61.7277	88.1847	87.6522	84.5607	48.3949	51.0336	47.2923	84.4445	85.237	80.9716	acs-5	-1.25717	-0.0406979	-0.719385	-1.35766	-0.782645	-0.314305	-1.14077	-0.369464	5.83567e-24	5.63045e-22	0.238092	0.481304	4.26756e-18	4.25947e-16	7.32632e-10	2.79027e-08
WBGene00013587	Y80D3A.9	13.5533	14.5754	12.6956	8.44203	7.82006	8.27403	12.5095	9.60161	9.84098	7.24196	5.7975	7.42105	6.63491	6.49496	6.67441	5.59012	5.48622	5.83652	9.78898	9.96059	10.3476	7.31017	7.60544	8.27312	8.08835	7.82006	8.05705	Y80D3A.9	-0.728766	-0.356607	-0.996112	-1.03958	-1.26515	-0.436835	-0.818218	-0.764454	1.65733e-09	1.32225e-08	7.03728e-05	0.00508718	1.16068e-11	3.43398e-10	6.11515e-06	6.42091e-05
WBGene00013594	Y87G2A.2	10.6263	11.6235	10.9465	24.6676	26.5955	25.6997	10.9611	11.305	11.0273	6.92635	6.67228	7.59791	13.1912	15.1778	11.5793	5.3207	6.15075	5.81416	8.62555	8.74049	8.79078	19.7365	19.4714	19.31	9.05533	9.12124	8.74889	Y87G2A.2	1.21196	0.0077199	-0.640412	0.266534	-0.932374	-0.340135	0.82084	-0.297965	1.72509e-17	5.13889e-16	0.914225	0.96349	1.72532e-08	2.57198e-07	0.000116233	0.000737801
WBGene00013650	Y105C5B.9	8.18251	7.6233	8.38819	6.23514	6.53476	6.49496	8.76285	7.51082	6.33532	5.47748	5.15904	5.47748	4.34588	4.94388	4.90654	4.57961	4.3779	4.64792	7.71171	6.53841	6.69605	6.96009	6.50009	5.95424	6.29116	6.73207	6.71341	Y105C5B.9	-0.329326	-0.102931	-0.582369	-0.768678	-0.826105	-0.204127	-0.31175	-0.293667	0.00081744	0.00222063	0.228616	0.470981	1.18767e-06	1.03597e-05	0.0249348	0.0645948
WBGene00013690	hprt-1	83.2819	85.6421	78.5467	37.8234	38.4168	39.2986	78.6803	66.1687	71.2287	48.4487	48.3262	49.0119	26.8704	26.8766	25.8202	50.4478	50.4768	51.8162	61.7078	63.803	61.1848	37.1815	36.2969	36.7186	56.7472	60.1705	60.4402	hprt-1	-1.09855	-0.197724	-0.761802	-1.63508	-0.694178	-0.406087	-1.16592	-0.479875	5.36872e-20	2.40926e-18	6.0614e-05	0.00485108	3.21832e-16	2.11714e-14	3.31971e-10	1.37927e-08
WBGene00013699	Y106G6D.2	2.42996	2.15096	2.41918	0.698364	0.45035	0.94589	2.39336	2.40507	3.40989	1.29495	1.79548	1.34248	0.807674	1.04579	1.21588	2.05374	1.87563	2.26581	1.77533	1.48494	1.80885	1.50609	1.33165	1.57111	1.77411	2.07901	2.17676	Y106G6D.2	-1.81324	0.196534	-0.684664	-1.22328	-0.17924	-0.468198	-0.682322	-0.223529	1.22209e-07	7.21662e-07	0.181327	0.411648	0.000714715	0.0026512	0.0089827	0.0278386
WBGene00013716	Y106G6H.1	21.0126	18.2575	18.5243	33.8608	31.1019	32.2343	18.0776	17.1764	18.5875	11.9888	10.8972	12.1471	20.1742	20.8579	23.0075	12.6693	14.0527	12.5095	13.2644	15.4577	14.2326	26.3202	25.7661	27.7829	13.9881	13.7404	13.8666	Y106G6H.1	0.75139	-0.104664	-0.723098	0.143241	-0.56115	-0.436717	0.463114	-0.475259	2.47547e-13	3.59461e-12	0.108937	0.303579	8.80925e-11	2.14874e-09	4.77732e-07	7.86424e-06
WBGene00013728	Y111B2A.2	53.5316	52.2343	54.5579	55.5528	56.118	54.3876	56.2241	29.6927	31.2444	32.7649	31.9618	31.1399	31.2081	30.3491	32.2343	32.1066	30.5004	33.6291	32.9893	30.8768	33.0708	34.792	33.7327	34.2543	36.4125	34.5372	35.098	Y111B2A.2	0.0506571	-0.509789	-0.742157	-0.774076	-0.735468	-0.72406	-0.640532	-0.59622	0.639043	0.710698	0.00010282	0.00595222	9.90023e-07	8.86275e-06	1.173e-06	1.64418e-05
WBGene00013751	Y113G7A.14	1.32637	1.29609	1.1191	0.743452	0.814351	0.62757	0.781823	0.907391	0.75067	1.01645	0.594923	0.842509	0.699597	0.781823	0.868797	0.664084	0.721714	0.84371	0.819985	1.14768	0.663592	0.913106	0.685773	0.62757	1.00788	0.412165	0.766279	Y113G7A.14	-0.77543	-0.612411	-0.634176	-0.675278	-0.733933	-0.550936	-0.748414	-0.870506	0.00347677	0.00818172	0.0118501	0.0762758	0.0130233	0.0325809	0.0220866	0.0585973
WBGene00013761	Y113G7B.11	0.735531	0.884456	0.690435	0.376178	0.623883	0.423735	0.714778	0.571235	0.59979	0.479036	0.274186	0.439527	0.314909	0.573975	0.192078	0.511421	0.75067	0.507819	0.386511	0.479036	0.698364	0.596149	0.557617	0.382116	0.513777	0.378342	0.454863	Y113G7B.11	-0.730807	-0.281732	-0.969053	-1.19451	-0.388821	-0.604417	-0.575435	-0.774478	0.0178476	0.0345127	0.279083	0.52745	0.00544631	0.0155161	0.0404869	0.0959388
WBGene00013797	Y116A8C.20	0.37194	0.481012	0.312325	0.347299	0.287354	0.210348	0.314909	0.341222	0.374786	0.171705	0.240311	0.163406	0.314909	0.492108	0.192078	0.392683	0.224709	0.210348	0.204483	0.133009	0.34017	0.413184	0.51895	0.467086	0.289881	0.278511	0.48903	Y116A8C.20	-0.448857	-0.154604	-1.01949	-0.274123	-0.55816	-0.850705	0.288495	-0.165774	0.211428	0.28885	0.638363	0.814813	0.0185931	0.0441913	0.0357325	0.0864057
WBGene00013819	Y116F11A.6	1.84833	1.82559	2.18328	0.721714	1.24867	0.915166	1.86853	1.18846	1.23253	1.01645	1.07622	1.49883	0.623883	0.548838	0.571235	1.28401	1.29959	1.56849	1.74784	2.09289	1.59895	0.707884	0.623883	0.669264	1.73471	1.73368	1.99152	Y116F11A.6	-1.07203	-0.468776	-0.707379	-1.74251	-0.486498	-0.117116	-1.54456	-0.101442	1.28389e-05	5.11993e-05	0.00950275	0.0667393	0.0007918	0.00290293	0.463383	0.604808
WBGene00013867	ZC373.2	217.438	201.774	212.195	43.7904	38.9661	40.8149	208.376	146.312	147.38	101.449	113.121	107.516	33.224	32.1263	33.728	119.641	119.521	122.183	82.6684	80.6566	86.2022	36.6446	36.5314	30.68	101.888	94.4184	87.2098	ZC373.2	-2.3486	-0.348555	-0.971259	-2.66876	-0.803942	-1.33803	-2.59722	-1.1565	1.7131e-20	8.42817e-19	9.09627e-05	0.00572645	1.36139e-12	4.68182e-11	1.03048e-15	1.36614e-13
WBGene00013872	ZC374.2	8.48379	8.39913	8.75054	5.69527	5.35038	5.06914	8.71132	8.02547	9.35794	3.61753	3.80555	3.96985	5.51118	4.65647	4.97142	4.80033	4.43162	4.91767	5.15541	5.2722	5.06048	5.8672	5.77251	5.45878	7.50659	6.06637	6.59701	ZC374.2	-0.666501	0.0197821	-1.16706	-0.762937	-0.857578	-0.726903	-0.580792	-0.351939	5.94224e-09	4.35255e-08	0.781059	0.896185	7.97707e-13	2.85645e-11	1.39785e-09	4.94492e-08
WBGene00013874	ZC376.2	29.4835	30.8312	30.7307	48.9457	53.2977	51.7643	28.4209	31.6018	31.3666	15.5441	15.6764	14.8722	46.7365	46.8472	46.7778	19.6683	20.7403	19.7036	22.4479	21.0513	21.0033	47.3665	45.5974	49.9524	22.8399	21.5478	25.8621	ZC376.2	0.757433	0.00376487	-0.984666	0.626322	-0.598754	-0.495457	0.648462	-0.379136	4.0425e-15	7.96891e-14	0.94377	0.976563	2.71724e-15	1.51737e-13	2.02569e-09	6.88456e-08
WBGene00013875	ZC376.3	12.4829	14.0026	12.0193	22.5194	21.7017	21.0701	13.0054	13.2601	15.2548	8.046	7.66331	8.11205	21.4959	20.2679	21.036	3.75996	3.29857	4.64792	12.9827	14.3755	12.5814	17.6313	19.515	20.6191	9.64285	9.78898	9.37092	ZC376.3	0.76986	0.10709	-0.687761	0.711531	-1.7214	0.0534189	0.584064	-0.413388	1.18347e-11	1.32602e-10	0.162131	0.38561	1.60871e-08	2.41892e-07	0.487194	0.625313
WBGene00013904	ugt-6	7.82674	7.9428	7.42447	4.17515	4.41827	3.76454	7.88912	8.47844	6.66322	2.99485	2.94346	2.7406	2.49654	2.66143	2.88906	2.30745	2.75677	2.71647	4.54398	4.6527	4.95758	3.33787	3.71092	3.6722	4.26071	4.73184	4.55917	ugt-6	-0.907128	-0.0104411	-1.4176	-1.52823	-1.56502	-0.712503	-1.11276	-0.773791	9.38928e-11	9.16603e-10	0.889554	0.950291	1.84517e-13	7.40069e-12	5.7508e-09	1.74301e-07
WBGene00013905	ugt-4	2.33623	2.73998	2.99871	0.842509	0.917178	1.07869	2.59059	3.37081	3.17521	1.75873	1.18521	1.49883	1.04747	1.19668	1.06164	1.86386	1.4949	1.44595	1.64279	2.52916	1.9506	1.15628	1.2149	1.3772	2.23362	2.52533	2.98751	ugt-4	-1.54161	0.180241	-0.884432	-1.29883	-0.775887	-0.436287	-1.13218	-0.060768	8.08639e-08	4.91896e-07	0.191153	0.424141	3.0587e-05	0.000172189	0.00816729	0.0257425
WBGene00013906	ugt-5	9.43459	7.98339	8.09572	2.65929	2.809	2.21743	9.64002	11.4816	11.8808	5.11668	5.20167	4.79918	2.43714	2.50403	2.65478	2.94649	3.21813	2.96761	7.55527	7.39057	7.32104	2.49202	2.9888	3.3488	7.2898	7.29573	7.65997	ugt-5	-1.73834	0.362119	-0.760014	-1.75427	-1.48491	-0.196092	-1.55579	-0.199021	3.39977e-14	5.76037e-13	4.94744e-05	0.00447974	9.78503e-09	1.5365e-07	0.0249578	0.0646334
WBGene00013928	clec-94	1.41213	0.851439	1.05492	0.049777	0.0176617	0.0899412	0.447775	0.746402	0.672945	0.311275	0.374786	0.258512	0.204483	0.0557608	0.133009	0.698364	0.66043	0.628795	0.292279	0.211465	0.37194	0.204483	0.0899412	0.0957236	0.580219	0.378342	0.347299	clec-94	-4.64283	-0.851087	-1.81604	-3.24882	-0.729434	-1.92819	-3.15212	-1.36254	5.17518e-06	2.23298e-05	0.00276438	0.0311747	3.99304e-05	0.000216575	2.25017e-05	0.000185823
WBGene00013933	clec-99	1.84833	1.22091	1.46407	0.376178	0.26335	0.423735	0.876408	0.976111	1.00566	0.951955	1.32375	0.842509	0.513777	0.367495	0.542482	1.32867	0.913106	1.10134	0.669264	0.67057	0.883744	0.377175	0.51895	0.467086	0.973362	0.545169	0.729335	clec-99	-2.12512	-0.667772	-0.5751	-1.70511	-0.466935	-1.04354	-1.75619	-1.05475	7.30776e-07	3.7493e-06	0.00247965	0.0292555	0.00865991	0.0229333	0.000100854	0.000656988
WBGene00013941	ZK218.7	0.222487	0.165854	0.246492	0.298269	0.142487	0.392683	0.12126	0.341222	0.0899412	0.240311	0.049777	0.0162814	0.175358	0.140385	0.100299	0.236835	0.196961	0.0927874	0.170646	0.0590172	0.12278	0.167091	0.234285	0.176446	0.12278	0.174816	0.115381	ZK218.7	0.292625	-0.414856	-1.89977	-0.623376	-0.403951	-0.930925	-0.132676	-0.627811	0.552509	0.635038	0.448302	0.681995	0.0184114	0.0438374	0.13757	0.248277
WBGene00013946	ZK228.3	25.6848	25.5831	24.471	7.68954	6.62827	7.85245	27.0918	19.5043	23.5075	11.8852	12.8145	14.3783	6.27881	6.30456	5.26189	7.55769	9.64002	9.92481	21.6633	19.3688	20.763	7.56611	8.05886	7.22653	20.02	17.4788	20.3084	ZK228.3	-1.76172	-0.123601	-0.947858	-2.07131	-1.4677	-0.289286	-1.71241	-0.39209	8.56911e-15	1.59507e-13	0.147823	0.364717	2.25257e-10	5.06085e-09	0.0022315	0.00876998
WBGene00013951	ZK262.4	1.28464	0.884456	1.05492	0.892127	0.782896	1.0047	0.913106	0.907391	0.672945	0.84371	0.735531	0.476665	0.973362	0.729335	0.751275	0.427577	0.913106	0.909788	0.729335	1.10134	1.12898	0.842509	0.833198	0.872637	0.651577	0.814351	0.942246	ZK262.4	-0.266539	-0.366032	-0.697748	-0.396141	-0.540493	-0.165211	-0.331807	-0.430921	0.261367	0.344419	0.131002	0.340025	0.0142117	0.0350489	0.472366	0.612573
WBGene00013954	ZK262.9	0.37194	0.519484	0.246492	0.210348	0.174276	0.366258	0.413184	0.373631	0.231815	0.140385	0.174276	0.19592	0.175358	0.115381	0.163406	0.27634	0.284702	0.240311	0.26335	0.211465	0.298269	0.309995	0.269248	0.0957236	0.324738	0.378342	0.314909	ZK262.9	-0.599548	-0.108577	-1.07203	-1.26268	-0.433739	-0.483272	-0.784805	-0.0866176	0.110486	0.166911	0.741801	0.873621	0.0160739	0.0390318	0.186213	0.311227
WBGene00013964	ZK287.3	6.06226	6.67813	6.30804	1.56669	1.97857	2.03249	7.02801	6.80092	6.63491	2.83357	2.43144	2.2162	1.79548	1.75499	2.02485	3.18438	2.85201	3.06189	3.92301	3.28725	4.18942	2.52472	2.43144	2.26278	5.28125	5.04432	5.14253	ZK287.3	-1.79769	0.108027	-1.36416	-1.78272	-1.07105	-0.741365	-1.39902	-0.29795	1.93256e-14	3.40393e-13	0.165993	0.391041	9.27813e-13	3.29516e-11	7.20266e-09	2.13462e-07
WBGene00013975	ZK455.5	2.56394	2.99371	2.70293	0.100299	0.234285	0.210348	2.24376	2.448	2.46692	1.49699	1.79548	1.82806	0.28854	0.26335	0.07642	1.56801	1.87563	1.69306	2.2097	2.36751	1.41213	0.342374	0.269248	0.346131	2.05958	2.15842	2.48357	ZK455.5	-4.04052	-0.201988	-0.683691	-3.89941	-0.675398	-0.489885	-3.11814	-0.300273	2.7287e-08	1.79641e-07	0.17792	0.407381	0.000433253	0.0017167	0.0045965	0.0160264
WBGene00013976	nhr-33	4.57036	4.6418	5.02507	3.68535	4.35251	4.00637	5.16976	4.62534	5.30576	2.64851	3.18438	2.7406	3.27753	3.8261	3.66147	2.78785	2.60803	2.68431	4.00774	4.72498	3.19142	4.96778	4.68284	4.40374	4.45767	4.19076	4.63375	nhr-33	-0.24997	0.0817675	-0.740331	-0.406342	-0.822423	-0.277594	-0.0153877	-0.101161	0.0229322	0.0430696	0.406982	0.648076	1.05014e-06	9.34314e-06	0.0130799	0.0378724
WBGene00013996	ZK550.2	16.4138	16.6044	17.6972	21.9563	22.9698	23.1262	15.1815	18.1718	16.0955	10.2886	11.4759	10.0633	19.0327	18.7925	18.2365	10.1134	9.77985	10.5947	14.63	14.9691	13.7937	21.4021	22.4312	21.9563	14.225	12.7828	14.2888	ZK550.2	0.42326	-0.0389586	-0.676411	0.146157	-0.732921	-0.225238	0.376222	-0.298418	4.1393e-08	2.64497e-07	0.519263	0.732048	1.12413e-10	2.68538e-09	0.00110436	0.0048952
WBGene00014000	ZK550.6	40.5005	42.4558	42.1289	79.5739	90.1405	84.1058	42.3131	43.4069	42.1909	23.4707	27.0078	25.4606	54.9879	52.8181	49.8674	22.7529	23.8712	24.6912	37.5558	33.9633	35.7867	60.3836	58.8375	57.0539	30.1644	28.7569	29.9759	ZK550.6	1.0176	0.033596	-0.719817	0.334933	-0.805792	-0.218137	0.496928	-0.491688	2.95838e-19	1.18931e-17	0.503415	0.721642	2.65359e-13	1.03098e-11	0.000215522	0.00123612
WBGene00014003	ZK593.3	4.41827	4.35359	3.76066	4.23247	5.10263	4.24504	4.37587	3.10907	4.96889	2.5805	2.30401	2.2162	2.52916	2.78166	3.8272	1.92819	2.35073	2.20449	2.89024	3.16948	2.9759	3.30454	2.79911	3.27637	3.52134	3.22069	3.33845	ZK593.3	0.109234	-0.0426792	-0.831398	-0.489638	-0.951918	-0.477901	-0.4293	-0.314378	0.399371	0.488442	0.74397	0.874761	1.72343e-05	0.000105205	0.00242962	0.00941226
WBGene00014016	ZK632.9	226.593	214.067	232.278	283.142	291.634	293.811	243.423	166.822	150.241	134.437	140.272	149.109	180.186	174.265	173.554	150.779	155.185	158.101	147.721	146.157	149.056	191.786	186.1	157.524	169.021	174.343	149.351	ZK632.9	0.367486	-0.291668	-0.66604	-0.349327	-0.534475	-0.602313	-0.330532	-0.451597	0.000325521	0.000969528	0.00395218	0.0389102	1.54807e-07	1.75861e-06	7.52684e-07	1.14065e-05
WBGene00014030	glb-1	20.0332	19.8107	19.3726	8.16362	9.99083	9.29121	20.4248	19.8645	20.4637	13.2507	12.8145	11.1304	10.1171	9.27743	8.7848	15.1706	13.843	14.9175	21.3976	17.4923	17.9619	11.6395	10.5934	12.0264	18.8444	18.3084	18.1295	glb-1	-1.12307	0.0363114	-0.680995	-1.07348	-0.434293	-0.0580332	-0.797202	-0.0995202	4.80515e-14	7.91005e-13	0.583275	0.776774	8.0033e-10	1.59396e-08	0.393418	0.538033
WBGene00014047	clec-61	1.57443	1.74784	2.21743	13.9491	13.0735	12.2529	1.55997	1.59895	1.52738	0.275204	0.308848	0.377175	1.29609	1.04579	1.37969	0.589691	0.539393	0.381028	0.757749	0.867561	1.24336	7.98707	7.47345	6.68112	1.63246	1.21233	1.11114	clec-61	2.84687	-0.222455	-2.51483	-0.572573	-1.90676	-0.975251	2.02102	-0.486959	9.2769e-18	2.96162e-16	0.196025	0.429927	2.81423e-07	2.96236e-06	7.18057e-05	0.00049443
WBGene00014052	ZK669.2	5.35196	5.91981	5.19364	7.68954	7.40977	7.55284	3.83866	4.79015	4.00836	3.61753	3.06777	3.19142	7.43755	6.43576	6.88969	3.67767	2.95636	3.54658	3.85381	3.16948	3.64684	7.27884	7.66442	8.27312	3.29741	3.41441	3.51615	ZK669.2	0.466636	-0.382112	-0.738868	0.336768	-0.700532	-0.619047	0.494058	-0.683553	6.67351e-06	2.81445e-05	0.000419484	0.0118074	1.86173e-07	2.0673e-06	1.66912e-06	2.19105e-05
WBGene00014057	ZK673.1	16.9926	17.9654	18.4884	0.765711	0.537469	0.833198	17.3284	16.2905	14.0586	3.21686	2.809	2.60208	0.671813	0.754237	0.542482	1.8932	1.8208	1.77533	8.8369	8.47553	10.4197	0.707884	0.908736	0.872637	9.64285	9.27743	8.16842	ZK673.1	-4.65285	-0.163346	-2.63688	-4.75632	-3.28139	-0.949435	-4.42654	-0.979899	1.1835e-15	2.55009e-14	0.0233861	0.117391	1.08691e-17	1.00406e-15	1.78639e-12	1.23112e-10
WBGene00014061	ZK673.5	0.545169	0.633246	0.819985	0.347299	0.423735	0.366258	0.511421	0.507819	0.75067	0.342374	0.439527	0.476665	0.436003	0.341222	0.312325	0.312325	0.314909	0.334011	0.355563	0.365129	0.409693	0.596149	0.557617	0.382116	0.402362	0.44407	0.386511	ZK673.5	-0.796712	-0.187536	-0.645808	-0.857701	-1.02515	-0.799563	-0.356994	-0.670615	0.0034506	0.00812673	0.3809	0.62471	0.0139213	0.0344159	0.0035	0.0128075
WBGene00014064	sdz-37	0.945286	1.00337	0.920663	0.403607	0.537469	0.27634	0.842509	0.537469	0.75067	0.377175	0.341222	0.377175	0.28854	0.386511	0.222487	0.350966	0.253557	0.381028	0.416662	0.479036	0.26335	0.525336	0.269248	0.26335	0.479036	0.545169	0.520555	sdz-37	-1.27545	-0.452613	-1.37702	-1.6878	-1.55036	-1.34159	-1.48859	-0.887298	9.56965e-05	0.000318018	0.0439724	0.172542	7.90107e-05	0.000392263	6.88966e-05	0.000477655
WBGene00014104	ZK849.6	1.77533	1.56669	1.81236	1.56669	1.52738	1.59382	1.60137	1.08565	1.04747	1.18946	1.18521	1.12127	0.865354	1.10134	1.18521	1.1191	1.12379	1.07104	0.669264	1.10134	1.20431	0.842509	1.33165	1.33114	0.684565	0.879465	0.729335	ZK849.6	-0.13984	-0.489287	-0.569843	-0.733798	-0.646844	-0.873045	-0.608056	-1.18513	0.40923	0.498463	0.0106245	0.0713947	0.00553917	0.0157443	0.000168861	0.00100466
WBGene00014131	sdz-38	0.404605	0.44667	0.413184	0.269248	0.341222	0.27634	0.346131	0.341222	0.34017	0.275204	0.240311	0.19592	0.234285	0.204483	0.341797	0.312325	0.346131	0.240311	0.292279	0.211465	0.409693	0.413184	0.234285	0.176446	0.187715	0.278511	0.423735	sdz-38	-0.523897	-0.296033	-0.852237	-0.742028	-0.518046	-0.511653	-0.685114	-0.587876	0.102472	0.156671	0.319386	0.566792	0.0190812	0.045203	0.11147	0.210791
WBGene00014134	ZK896.3	4.94263	4.58088	4.64131	1.49699	1.32867	1.65355	4.07742	5.42748	5.5691	1.68997	1.99411	1.66143	0.896232	0.877423	0.925647	2.09113	1.79	2.06303	2.61322	2.56394	2.91936	1.29897	1.43741	1.29495	4.66523	3.45335	4.24504	ZK896.3	-1.67357	0.0691392	-1.421	-2.40384	-1.26443	-0.813596	-1.82005	-0.211342	5.84115e-11	5.87396e-10	0.501315	0.720122	5.69466e-10	1.17347e-08	4.34186e-07	7.28552e-06
WBGene00014136	ZK896.5	8.61519	9.24389	7.73924	34.0251	37.9952	36.9189	8.20459	9.1324	8.67396	5.25823	5.96762	5.38678	31.6696	33.3033	33.5866	11.9122	12.122	12.4217	6.0193	5.52337	5.67919	24.6912	23.1521	26.4424	6.31106	7.44254	7.90221	ZK896.5	2.09389	0.0270917	-0.62395	1.95293	0.518253	-0.565607	1.53859	-0.243281	3.97797e-22	2.63685e-20	0.747426	0.87651	5.54667e-07	5.32793e-06	1.7371e-06	2.26318e-05
WBGene00014137	clec-187	17.8598	18.6389	18.9309	4.51513	4.17815	4.15059	18.9775	17.8674	15.4021	12.2747	11.5329	11.2309	3.59914	3.21424	3.62511	9.58509	9.67705	9.71944	16.6187	16.5426	17.9186	2.9375	4.15413	3.93368	14.8184	15.7742	15.406	clec-187	-2.10504	-0.084779	-0.663007	-2.41142	-0.933278	-0.11787	-2.34927	-0.267907	2.10516e-18	7.43119e-17	0.188381	0.420678	4.20736e-10	8.90003e-09	0.0752543	0.155533
WBGene00014138	clec-186	42.6094	44.7445	47.1993	10.5947	10.1571	9.24389	41.0854	43.5145	44.6806	26.0414	27.5256	28.1858	5.74645	4.84986	5.48749	11.0472	12.3782	12.0217	46.8892	45.1771	44.9729	8.68925	8.05886	7.79761	29.2996	29.1437	25.6475	clec-186	-2.15742	-0.0574244	-0.714791	-3.06081	-1.91555	0.0294591	-2.44481	-0.676843	1.51035e-22	1.07943e-20	0.247841	0.492283	1.46679e-13	5.99381e-12	0.549466	0.678296
WBGene00014141	ZK899.2	34.7377	36.9669	34.5052	31.2136	31.2933	30.3174	32.5237	30.9507	29.5909	14.3755	13.9707	15.4543	20.953	21.2705	20.5472	19.0199	18.1592	17.6877	20.2269	19.8598	19.6747	24.2546	24.9803	22.9776	22.9076	24.2345	21.6674	ZK899.2	-0.191815	-0.187919	-1.27312	-0.755535	-0.953751	-0.826133	-0.551726	-0.624335	0.000176554	0.000554867	0.000203294	0.00836638	6.97233e-20	9.46003e-18	3.27106e-16	4.65643e-14
WBGene00014173	ZK970.7	5.71483	3.93589	4.34646	168.248	172.717	162.35	3.18106	3.54146	3.74611	2.79854	3.52007	3.29092	45.8153	44.2557	46.3012	3.14301	3.3636	2.85607	4.04917	3.0174	4.18942	26.3511	26.3511	26.8704	3.86738	4.28937	4.07501	ZK970.7	5.16829	-0.416278	-0.536375	3.28506	-0.576502	-0.309671	2.50917	-0.186682	2.75482e-28	1.22674e-25	0.002307	0.0280179	0.000369504	0.00149934	0.0184266	0.0504836
WBGene00014206	nit-1	6.76118	7.42341	8.01607	8.67701	9.56228	9.0575	8.79078	7.22834	8.50735	2.50403	2.57795	2.60208	5.96039	5.72331	6.58859	3.32169	2.54409	2.61438	5.18937	5.24362	4.74933	6.70761	7.05901	7.84073	5.15999	5.01582	5.36136	nit-1	0.301002	0.143179	-1.53953	-0.283349	-1.42154	-0.548208	-0.0452994	-0.513825	0.000777601	0.00212571	0.0876093	0.265559	8.25142e-13	2.94861e-11	2.24701e-06	2.7934e-05
WBGene00014216	ZK1086.2	1.25092	0.965141	1.1191	0.44667	0.594923	0.684565	0.913106	1.32981	0.97068	0.814351	0.534617	0.698364	0.646365	0.492108	0.513777	0.736668	0.439527	0.567005	0.97068	0.746979	0.812844	0.631653	0.557617	0.829635	1.15263	1.10134	0.807674	ZK1086.2	-0.996149	-0.0705379	-0.727571	-1.0277	-0.993035	-0.397003	-0.768981	-0.137919	0.000361026	0.00106577	0.713715	0.858796	0.00423335	0.0125056	0.0674975	0.143112
WBGene00014251	gstk-1	27.0674	26.9645	25.7328	53.0337	52.4777	49.1802	25.9489	26.3554	26.6501	14.686	14.5133	13.972	24.1483	24.3609	23.8712	14.535	14.3379	15.4162	21.2913	20.3508	22.4039	39.5593	40.3231	42.4349	25.1946	23.9496	25.5496	gstk-1	0.956305	-0.0149416	-0.886948	-0.139496	-0.846968	-0.31653	0.614309	-0.0954931	6.36238e-20	2.83322e-18	0.739388	0.872051	2.98164e-16	1.98399e-14	2.32899e-07	4.34921e-06
WBGene00014253	ZK1320.3	84.9404	92.3727	94.6881	12.4811	12.0526	13.2055	89.6625	74.7343	75.2329	52.8181	62.0109	55.5871	9.92985	9.98469	10.6631	63.6427	62.874	61.1086	71.0079	68.6676	72.1994	12.0169	12.1647	10.3365	64.3844	66.2752	65.2829	ZK1320.3	-2.84703	-0.183992	-0.675494	-3.15127	-0.534348	-0.357441	-2.97044	-0.470492	6.76097e-24	6.31278e-22	0.00178523	0.0242409	1.70965e-12	5.78782e-11	4.00468e-07	6.83195e-06
WBGene00014294	C53C7.5	47.204	43.5073	49.8044	77.4238	84.6043	77.6758	42.8465	16.7863	14.8996	15.227	16.1794	16.1501	28.4249	27.9793	29.1475	14.7573	15.4138	15.4162	14.309	14.6751	14.0966	25.979	24.6405	25.7399	15.051	14.9741	14.6582	C53C7.5	0.76796	-1.06837	-1.55651	-0.714103	-1.61599	-1.69997	-0.876929	-1.64712	8.47263e-06	3.50343e-05	1.21556e-06	0.000361456	1.58372e-08	2.38341e-07	3.77882e-09	1.19105e-07
WBGene00014666	C05D12.3	122.499	115.012	115.052	14.8798	14.8208	12.3011	119.042	125.411	129.51	65.7113	65.236	63.0603	10.2995	11.3316	10.8834	43.1242	47.6764	45.7381	87.4769	84.9925	87.4986	13.8918	11.2821	12.4829	71.8604	77.0516	77.4717	C05D12.3	-3.06807	0.0833156	-0.862221	-3.43612	-1.36637	-0.438984	-3.22897	-0.63975	3.97635e-27	1.04632e-24	0.0607956	0.21237	2.9471e-17	2.41425e-15	1.20723e-10	5.4036e-09
WBGene00014746	F27D4.3	1.77533	2.25894	1.85052	1.41462	1.71902	1.62378	1.96439	1.32981	1.72157	1.32637	0.86597	1.40626	1.2291	1.60137	1.302	1.19181	1.08335	1.56849	1.28401	2.17305	1.01645	0.876408	1.43741	1.49591	1.63246	1.80885	1.641	F27D4.3	-0.307116	-0.236999	-0.721852	-0.503554	-0.608915	-0.476867	-0.673672	-0.197648	0.143565	0.20848	0.24247	0.485695	0.0046964	0.0136689	0.033281	0.0816814
WBGene00014759	F46A8.1	1.6095	1.74784	1.19181	16.1584	19.3426	16.2629	1.52494	1.70849	1.94926	0.980287	0.665602	0.753274	8.68733	8.39298	8.60371	1.04526	1.00566	1.35728	1.10134	1.14768	1.28112	15.0586	14.8243	17.5449	1.4346	1.24103	0.729335	F46A8.1	3.53555	0.196686	-0.934566	2.53006	-0.399607	-0.354685	3.40562	-0.451121	4.5922e-17	1.28426e-15	0.332223	0.579083	0.00190141	0.00622582	0.12704	0.233372
WBGene00014761	F46A8.11	1.67496	1.79058	2.04776	0.236835	0.204483	0.392683	2.06512	2.22088	2.21228	1.04991	0.665602	1.12127	0.26335	0.204483	0.192078	0.62757	0.721714	0.793842	1.51896	1.14768	1.56565	0.413184	0.409693	0.346131	1.4346	1.52847	1.24967	F46A8.11	-2.74872	0.24112	-0.965241	-3.02532	-1.33306	-0.37289	-2.19525	-0.380438	9.96345e-09	7.04564e-08	0.082178	0.256008	1.83328e-05	0.00011082	0.0218549	0.0581336
WBGene00014864	Y18D10A.22	1.01361	1.00337	0.954048	0.567005	0.341222	0.684565	1.04747	1.46864	1.19437	0.573975	0.439527	0.346131	0.436003	0.492108	0.628795	0.511421	0.346131	0.270359	0.539892	0.785398	0.626464	0.413184	0.685773	0.669264	0.651577	0.636929	0.698364	Y18D10A.22	-0.970826	0.310938	-1.19878	-0.976264	-1.51381	-0.653437	-0.817638	-0.592666	0.000839915	0.0022728	0.112558	0.30981	0.000238141	0.0010306	0.0097186	0.0296892
WBGene00014883	Y39C12A.2	0.609498	0.519484	0.652248	0.669264	0.481012	0.62757	0.511421	0.240311	0.201717	0.513777	0.274186	0.19592	0.376178	0.492108	0.279805	0.27634	0.314909	0.44407	0.386511	0.594923	0.18888	0.273059	0.481012	0.26335	0.363901	0.412165	0.314909	Y39C12A.2	-0.00352993	-0.989101	-0.975879	-0.644743	-0.771724	-0.74861	-0.826634	-0.700132	0.990697	0.993558	0.0140679	0.085695	0.0179475	0.0428681	0.0458067	0.105676
WBGene00014941	Y67H2A.9	11.4572	13.0181	12.6956	3.71222	3.29693	3.36021	13.3497	9.85679	12.3528	7.11575	7.39429	6.20287	2.68013	2.5531	2.83414	7.85832	7.06664	6.59846	8.28375	8.54368	8.11376	3.13111	3.94958	4.66523	8.92555	9.60888	8.4176	Y67H2A.9	-1.8478	-0.0728406	-0.854071	-2.22042	-0.801248	-0.575605	-1.70531	-0.46198	5.83524e-14	9.37471e-13	0.406959	0.648076	5.47239e-09	9.17365e-08	1.72883e-06	2.25579e-05
WBGene00014994	ZK1225.7	1.28464	1.67496	0.992178	0.992178	1.07869	1.18946	1.29959	1.08565	1.27082	1.01645	0.698364	0.973362	1.0212	0.936158	0.868797	1.37082	0.973362	1.30085	1.36123	1.06164	1.16429	1.15628	0.721714	0.953094	1.25337	1.10134	1.11114	ZK1225.7	-0.248184	-0.0779051	-0.530734	-0.443819	-0.0987809	-0.0951619	-0.472935	-0.150983	0.202881	0.278974	0.67084	0.834994	0.0175506	0.0420473	0.611566	0.730698
WBGene00014998	AH9.1	0.786693	0.744512	0.992178	0.347299	0.423735	0.178866	0.646365	0.537469	0.826967	0.311275	0.274186	0.315972	0.234285	0.414279	0.312325	0.204483	0.284702	0.210348	0.513777	0.708856	0.409693	0.44916	0.201717	0.26335	0.580219	0.343787	0.559924	AH9.1	-1.48179	-0.353248	-1.47933	-1.42204	-1.85762	-0.667181	-1.53713	-0.80214	0.000182811	0.000572185	0.155347	0.376174	0.000246158	0.00106076	0.0190693	0.0518598
WBGene00015010	ptps-1	8.33334	8.53766	7.71171	3.0765	2.73422	2.97722	8.47188	6.15166	7.57936	2.99485	3.83687	4.2026	2.73262	2.47857	2.26852	4.0558	4.00637	3.40534	7.00205	6.14617	8.55367	2.78963	3.15806	3.1907	7.07857	6.73207	6.63491	ptps-1	-1.479	-0.158324	-1.15903	-1.71387	-1.11024	-0.188547	-1.43045	-0.264076	4.70471e-11	4.81194e-10	0.13091	0.339838	1.9584e-09	3.6221e-08	0.0796174	0.162443
WBGene00015038	nstp-6	5.96039	6.49496	6.63145	6.23514	5.00637	5.46254	5.92194	5.71704	5.67143	3.65626	4.24504	5.15805	4.8445	4.87245	4.58866	3.85381	4.04917	3.81194	4.60053	4.29064	5.33444	5.58882	5.81792	4.66523	5.31844	5.28979	4.83062	nstp-6	-0.184387	-0.135116	-0.542579	-0.407668	-0.694367	-0.421121	-0.235816	-0.300427	0.0653551	0.106126	0.162207	0.385637	1.9516e-05	0.000116995	0.000263159	0.00145736
WBGene00015044	cyp-34A9	4.77157	4.96778	4.70844	20.7403	22.5256	20.2516	6.1879	7.93834	7.26174	2.40565	3.02458	2.92438	5.45499	5.24878	5.59012	3.63405	4.12746	4.57036	4.63992	4.14812	3.84904	5.76559	5.81792	6.58673	6.18212	5.88442	6.94331	cyp-34A9	2.1336	0.558105	-0.791087	0.173029	-0.220319	-0.18978	0.323104	0.391869	1.13087e-19	4.86133e-18	3.98772e-06	0.000865685	1.32506e-06	1.13585e-05	0.0952716	0.187064
WBGene00015046	nlp-34	2.71785	1.60309	2.29281	90.4984	91.8045	88.1982	1.66622	1.85052	2.02585	1.40056	1.89124	0.907391	32.0355	31.0272	34.4969	2.0085	1.91524	1.84833	1.60549	1.18846	1.98548	21.4521	20.9843	25.3388	2.02119	1.55997	2.0687	nlp-34	5.38872	-0.249841	-0.73298	3.91231	-0.18762	-0.478756	3.37568	-0.22653	4.93548e-22	3.23451e-20	0.231752	0.473976	0.0047661	0.0138574	0.0382693	0.0913822
WBGene00015050	clec-51	15.0628	14.2224	14.205	7.17143	6.107	7.08424	15.2183	15.8154	16.8402	7.27792	5.99269	5.52212	5.33672	5.19364	5.55732	6.58185	6.54319	5.99562	12.7435	13.4509	13.4439	6.33371	6.59122	9.20173	9.97756	10.333	10.0104	clec-51	-1.10281	0.134604	-1.23592	-1.44681	-1.19975	-0.138452	-1.02209	-0.523756	1.75808e-12	2.24505e-11	0.0752568	0.242844	4.46251e-13	1.66086e-11	0.0806187	0.164081
WBGene00015080	B0244.5	1.92682	1.82559	1.81236	3.30297	2.89358	3.81795	1.70041	2.85849	2.21228	0.643159	0.665602	0.781823	2.82008	2.47857	2.83414	0.937798	0.973362	0.909788	1.28401	1.02501	1.0519	3.50405	3.67156	3.58922	1.29495	1.07104	1.15016	B0244.5	0.835201	0.248671	-1.40621	0.539764	-0.979578	-0.722524	0.949389	-0.666859	1.39728e-06	6.77082e-06	0.0963181	0.281183	2.01751e-06	1.65118e-05	0.000469628	0.00237993
WBGene00015100	B0280.2	1.28464	1.25609	1.33114	1.70091	1.55243	1.65355	1.04747	1.70849	1.72157	0.377175	0.771209	0.87529	1.76935	1.75499	1.79919	1.77937	1.94727	1.74784	1.10134	1.29495	0.847262	1.81817	1.66745	1.93829	1.83989	1.40365	2.0687	B0280.2	0.343864	0.163703	-1.01011	0.459104	0.498678	-0.281981	0.477068	0.433843	0.083556	0.13124	0.407452	0.648254	0.00100289	0.0035538	0.201672	0.330606
WBGene00015108	B0281.1	0.170646	0.269248	0.246492	0.160002	0.142487	0.0899412	0.346131	0.240311	0.201717	0.0169575	0.0169575	0.0661117	0.0654893	0.0866407	0.0162814	0.0176617	0.0162814	0.0162814	0.0162814	0.174276	0.0888273	0.0899412	0.0899412	0.176446	0.0866407	0.0162814	0.0162814	B0281.1	-0.805569	0.213395	-3.09489	-2.29646	-3.76879	-1.9151	-1.02654	-3.00398	0.148102	0.21402	0.637594	0.814813	0.000990694	0.00351776	0.00916109	0.0282645
WBGene00015110	B0281.3	8.51217	9.03041	9.52824	15.6801	15.8954	15.3025	8.42706	7.79161	7.75703	5.04057	5.96762	5.65088	10.6704	10.8197	10.1773	5.3207	5.5691	5.06177	6.4395	7.01127	7.58058	13.4209	12.934	13.8505	7.00205	7.47671	6.89182	B0281.3	0.795892	-0.172179	-0.701046	0.230317	-0.764113	-0.36924	0.570947	-0.338646	1.82595e-13	2.71325e-12	0.0168017	0.0959851	8.64755e-10	1.7105e-08	1.58988e-05	0.000140302
WBGene00015141	ugt-46	86.1917	90.4824	92.0858	12.7278	12.0193	13.7893	83.1057	76.7559	77.649	48.1015	48.4334	48.5134	10.3511	10.3476	11.5029	33.4804	33.3488	34.116	63.2556	66.4488	67.765	13.7893	14.9407	12.9199	49.3049	51.5436	48.1083	ugt-46	-2.80335	-0.177561	-0.888418	-3.06386	-1.41091	-0.44536	-2.68595	-0.850362	9.94881e-28	3.67619e-25	8.10529e-05	0.00531187	9.31908e-19	1.04416e-16	6.86073e-12	4.05273e-10
WBGene00015167	B0403.3	5.52685	4.39374	4.77026	14.4149	13.9925	15.5465	5.58882	5.18423	5.01033	2.68297	2.02927	2.27536	9.99387	8.26797	9.64143	6.96688	7.44254	7.44502	3.35472	3.70416	3.47115	16.4078	16.5849	16.8781	5.19364	5.83261	5.11435	B0403.3	1.57757	0.104317	-1.08078	0.917656	0.575685	-0.484626	1.76115	0.134577	5.10252e-17	1.41558e-15	0.287415	0.536379	5.61683e-09	9.37056e-08	0.000122241	0.000768631
WBGene00015196	B0454.5	12.9456	14.7644	14.9347	8.26236	7.75162	8.79078	15.859	10.9238	11.2741	8.78837	10.3083	10.0633	8.01431	7.00779	7.47086	9.10435	9.08052	9.12622	13.1854	11.7159	10.9719	9.69529	9.58855	8.21758	14.1319	14.2672	12.339	B0454.5	-0.774284	-0.174116	-0.541151	-0.915847	-0.633851	-0.241169	-0.619451	-0.0614651	1.03436e-07	6.18373e-07	0.0823365	0.256215	2.07165e-05	0.000123045	0.0213064	0.0568748
WBGene00015205	moa-2	19.3688	19.9258	21.7755	19.2836	21.0093	20.7269	19.6934	10.8138	11.5448	12.7984	12.0312	11.7873	14.4072	13.7033	13.8756	13.3112	14.2201	13.7915	11.5793	11.9281	12.0334	13.1305	14.0098	12.7321	14.3531	13.4255	12.5948	moa-2	-0.00251918	-0.583111	-0.736933	-0.537754	-0.558751	-0.778919	-0.609629	-0.595478	0.98068	0.986359	1.53912e-05	0.00229514	1.02116e-06	9.10863e-06	3.51733e-07	6.10769e-06
WBGene00015279	C01B10.4	4.54038	5.37693	5.24362	3.42234	3.61404	3.5658	4.59756	5.40252	4.86005	2.50403	2.26852	2.06303	3.02458	3.85134	3.8272	2.26852	1.87563	2.17305	4.00774	3.41948	3.76559	4.92477	3.91765	4.6222	4.63375	3.92301	4.14112	C01B10.4	-0.512356	-0.0232708	-1.15653	-0.506497	-1.26972	-0.42801	-0.174457	-0.252114	6.24683e-05	0.000215812	0.813869	0.913256	2.07676e-09	3.81413e-08	0.000437137	0.00224276
WBGene00015280	C01B10.6	122.146	123.369	128.491	76.7723	72.5167	74.1111	112.614	96.7166	89.159	67.4398	67.5091	70.4704	52.4188	49.5606	50.0508	86.0848	91.7056	87.2098	80.3163	78.9895	85.4655	49.5399	52.4699	46.2057	72.8396	73.4913	71.529	C01B10.6	-0.741489	-0.329216	-0.862445	-1.29711	-0.495872	-0.611285	-1.33142	-0.778432	3.25948e-14	5.54974e-13	5.04243e-07	0.000190374	1.29476e-15	7.62242e-14	2.63836e-12	1.74222e-10
WBGene00015295	acl-12	19.9092	19.9258	19.6543	9.20429	9.36297	8.54368	17.6503	17.6373	17.4662	9.05349	10.0589	10.2087	7.82503	7.29573	6.95063	9.54239	9.33197	8.79733	14.6751	16.0566	13.8848	9.05533	8.87803	8.8369	12.5055	11.9997	11.7781	acl-12	-1.13355	-0.173063	-1.0205	-1.43036	-1.10874	-0.419819	-1.15141	-0.713563	1.9634e-17	5.80892e-16	0.00165809	0.0234015	2.58175e-16	1.74464e-14	9.18894e-09	2.63774e-07
WBGene00015369	ugt-51	4.57036	5.1219	4.64131	5.58947	5.59615	5.51522	5.01256	5.42748	5.38544	1.32637	2.16449	1.69238	4.15973	4.34588	4.1931	1.73755	1.36952	1.72157	3.44776	3.41948	2.83228	5.01684	5.44924	5.2138	2.65478	3.45335	2.92188	ugt-51	0.225868	0.145973	-1.49166	-0.169392	-1.57753	-0.56227	0.134063	-0.66864	0.0223302	0.0420663	0.130164	0.338762	7.88202e-11	1.94462e-09	1.74358e-05	0.000152088
WBGene00015389	scav-1	41.0695	40.4458	38.5163	23.7034	23.8773	22.3228	40.2282	44.9942	46.6847	25.9323	26.9645	27.7661	20.8764	20.667	20.1394	30.3804	31.1238	29.1029	34.9418	34.8642	36.829	22.9202	21.6433	22.9202	35.9492	35.0666	35.2781	scav-1	-0.779672	0.131657	-0.572678	-0.960103	-0.407435	-0.171278	-0.832827	-0.17525	2.6095e-15	5.3067e-14	0.00598805	0.0500655	3.03372e-12	9.77487e-11	0.000893585	0.0041197
WBGene00015400	cyp-35A2	42.9157	39.6694	41.2952	54.579	64.9031	56.4106	46.4008	58.5769	55.3682	9.54239	10.6092	9.64808	35.095	28.2272	35.3139	11.7841	14.3379	13.5533	16.1248	18.5069	16.4163	51.2264	44.4777	52.4588	29.2996	28.2703	30.9771	cyp-35A2	0.498829	0.363738	-2.06446	-0.340772	-1.64428	-1.28933	0.250114	-0.487633	7.45517e-07	3.81704e-06	8.47959e-05	0.00547454	6.72281e-16	4.15498e-14	3.71572e-13	2.91995e-11
WBGene00015419	srsx-18	0.545169	0.559924	0.378342	0.0778796	0.0866407	0.0899412	0.346131	0.537469	0.44916	0.204483	0.084508	0.127199	0.0654893	0.0866407	0.133009	0.236835	0.0682193	0.0927874	0.386511	0.28854	0.18888	0.052684	0.052684	0.0957236	0.154068	0.343787	0.246492	srsx-18	-2.55819	-0.158759	-1.92907	-2.45776	-2.16152	-0.810533	-2.98268	-1.05493	6.7754e-05	0.000232133	0.590424	0.78256	0.000344238	0.00141133	0.0262322	0.067333
WBGene00015435	C04E12.5	1.87428	1.44534	1.71902	0.347299	0.287354	0.308848	1.83858	1.81236	1.94926	1.01645	0.963501	0.907391	0.314909	0.312969	0.404605	0.698364	1.00566	0.507819	1.39319	1.48494	1.16429	0.631653	0.721714	0.467086	1.66905	1.17798	1.4995	C04E12.5	-2.41032	0.149425	-0.807092	-2.30089	-1.2545	-0.325366	-1.46816	-0.230637	4.93343e-08	3.10834e-07	0.31704	0.564309	0.000228928	0.000996687	0.0565211	0.124411
WBGene00015449	ugt-63	55.9435	52.0226	50.5709	12.3818	11.8093	11.5552	50.9295	53.1847	55.9833	27.4741	29.5909	27.7661	7.47671	6.64775	7.53161	42.9212	43.6245	42.6711	31.863	35.2872	34.1585	10.2493	9.26025	10.8419	46.7633	43.2421	47.315	ugt-63	-2.15088	0.0117727	-0.904915	-2.88214	-0.295495	-0.651146	-2.39831	-0.20909	1.67621e-23	1.44506e-21	0.798427	0.906589	1.67433e-16	1.18203e-14	1.67588e-13	1.46256e-11
WBGene00015462	C05C8.5	38.3242	39.4865	40.0506	38.8054	37.0709	36.6669	39.5073	23.1287	26.5513	24.5264	23.5634	24.9459	23.0564	24.2576	23.8362	24.5595	23.9887	22.318	26.1269	24.9945	24.0268	24.643	24.8729	25.6072	24.0509	24.895	23.8773	C05C8.5	-0.0645815	-0.436154	-0.688569	-0.727221	-0.737559	-0.647152	-0.649975	-0.693382	0.475585	0.563787	6.28514e-05	0.00490892	1.41663e-07	1.63581e-06	3.00727e-07	5.35714e-06
WBGene00015469	C05D2.8	61.2458	59.1477	59.2661	65.6744	64.3917	67.0166	57.6047	53.0991	54.7106	25.2365	27.0674	26.845	34.8371	32.2773	33.6833	23.3961	24.43	24.859	37.963	36.3385	39.2595	45.5032	46.4139	48.2103	33.787	33.4079	35.6821	C05D2.8	0.132953	-0.120064	-1.1824	-0.834937	-1.30319	-0.66178	-0.360699	-0.805513	0.00136467	0.00352813	0.00379849	0.0379514	2.55636e-21	4.53023e-19	8.16827e-16	1.09122e-13
WBGene00015479	wht-1	4.20388	3.78681	3.8261	10.6655	10.292	9.67469	3.83866	4.04917	4.63734	2.14845	2.43144	2.52916	8.89695	8.39298	8.73634	4.01807	4.00637	4.00836	2.92065	4.01807	3.23293	9.47547	8.25755	8.95825	3.47774	3.41441	3.15256	wht-1	1.3765	0.0729011	-0.736395	1.13856	0.02432	-0.244079	1.1723	-0.236765	3.11389e-15	6.23852e-14	0.466121	0.696415	1.6353e-06	1.36737e-05	0.0283797	0.0718155
WBGene00015497	nhr-76	17.4468	20.5133	19.419	9.0502	7.90221	8.82995	16.7526	18.9098	19.3908	12.0193	11.6368	10.2566	9.43712	9.72863	8.86771	13.2305	13.3497	15.3336	12.1147	12.9809	12.5216	9.86962	9.20173	9.02198	15.7279	17.2519	15.8334	nhr-76	-1.14642	-0.0579269	-0.759512	-1.02544	-0.443573	-0.605136	-1.022	-0.226905	4.24535e-14	7.03521e-13	0.391144	0.633911	1.23932e-10	2.94035e-09	5.60258e-09	1.70702e-07
WBGene00015531	C06E4.2	0.513777	0.306282	0.690435	0.567005	0.513777	0.656635	0.479036	0.404605	0.567005	0.204483	0.20813	0.377175	0.345064	0.367495	0.458477	0.589691	0.626464	0.44407	0.416662	0.28854	0.298269	0.377175	0.374786	0.221458	0.402362	0.44407	0.48903	C06E4.2	0.252715	-0.0186645	-0.904321	-0.320321	0.167175	-0.526707	-0.579054	-0.121175	0.347191	0.435512	0.946041	0.977531	0.0149933	0.036747	0.101104	0.195598
WBGene00015532	C06E4.3	0.913106	1.37016	1.77657	2.75622	2.8657	2.29126	0.913106	0.842509	0.709999	1.18946	0.534617	0.781823	0.865354	0.62757	0.66043	0.427577	0.539393	0.334011	0.729335	1.10134	0.847262	1.29897	0.833198	0.911899	1.1191	0.741324	0.559924	C06E4.3	1.02854	-0.658239	-0.713628	-0.867941	-1.62421	-0.577962	-0.375119	-0.740463	2.85309e-05	0.000106267	0.0204908	0.10896	0.0180484	0.0430499	0.0381177	0.0911078
WBGene00015569	C07D10.5	18.9035	17.9429	17.9512	6.23514	5.31844	6.99848	18.2538	20.3818	20.3341	11.7462	12.1694	11.5087	8.81387	7.35331	9.12622	13.4543	13.4144	14.0396	15.4732	14.9037	13.8848	10.1476	9.64002	10.1165	17.5408	18.5455	18.0776	C07D10.5	-1.57229	0.101832	-0.631918	-1.12687	-0.421288	-0.308436	-0.876523	-0.0177129	4.55792e-17	1.27673e-15	0.105321	0.297803	8.56125e-10	1.69536e-08	5.68427e-05	0.000406605
WBGene00015610	C08F1.6	4.57036	4.15302	4.21585	1.38307	1.32867	1.38094	5.01256	3.6494	4.42891	3.08322	2.68225	2.92438	2.15842	2.37327	2.63007	4.52264	3.78681	3.9172	3.18502	2.91745	2.83228	2.23024	2.36419	2.36419	3.83687	2.90064	3.86444	C08F1.6	-1.66693	0.00231706	-0.579663	-0.865754	-0.0970066	-0.534786	-0.901827	-0.305043	1.1816e-10	1.13063e-09	0.982575	0.99408	5.82818e-05	0.000301693	0.000110493	0.00070832
WBGene00015613	C08F1.10	5.81353	6.21947	5.0789	2.14971	1.85854	1.302	6.26952	4.75675	5.41867	3.76509	3.88179	4.2026	3.56628	3.74184	4.08871	4.92107	4.30674	5.08798	4.31827	3.16948	3.84904	3.80135	3.45024	4.05264	5.87149	4.64922	5.58637	C08F1.10	-1.68634	-0.0586168	-0.518621	-0.582204	-0.252723	-0.583658	-0.597026	-0.0889126	4.37174e-10	3.85597e-09	0.611014	0.798395	0.000398451	0.00159887	0.000100937	0.000657282
WBGene00015631	clec-89	0.482202	0.744512	1.05492	0.236835	0.341222	0.423735	0.646365	0.746402	0.869947	0.171705	0.240311	0.258512	0.175358	0.312969	0.133009	0.129589	0.377175	0.178866	0.292279	0.479036	0.37194	0.342374	0.374786	0.346131	0.580219	0.513777	0.62757	clec-89	-1.17591	0.0551511	-1.71378	-1.8875	-1.79287	-0.970234	-1.02768	-0.330405	0.0020374	0.0050555	0.827359	0.920542	0.000341852	0.0014028	0.0061074	0.020265
WBGene00015649	C09F5.3	0.545169	0.409061	0.312325	0.269248	0.174276	0.178866	0.284702	0.341222	0.374786	0.275204	0.174276	0.127199	0.14382	0.23574	0.222487	0.350966	0.284702	0.381028	0.26335	0.28854	0.37194	0.125671	0.374786	0.221458	0.324738	0.209236	0.314909	C09F5.3	-1.00952	-0.326981	-1.19821	-1.08088	-0.298069	-0.449447	-0.92086	-0.581025	0.0109707	0.022613	0.300889	0.54877	0.00510493	0.0146686	0.175533	0.297936
WBGene00015660	catp-3	48.0615	50.1621	48.2361	2.94346	3.0546	2.79231	44.0441	47.6147	48.087	14.7492	16.9391	16.1883	4.04872	3.8261	4.17195	26.6905	27.4032	26.3396	37.2076	35.0858	35.3202	3.80135	3.04271	3.52341	39.2004	39.4322	38.8542	catp-3	-4.05998	-0.0688036	-1.61424	-3.60724	-0.864301	-0.442516	-3.83016	-0.316995	3.22113e-25	4.30318e-23	0.0948661	0.278639	4.46648e-23	1.19338e-20	2.6545e-11	1.3844e-09
WBGene00015667	C10A4.6	0.641366	0.819985	0.920663	0.0162814	0.0176617	0.0169575	0.573975	0.746402	0.525336	0.377175	0.341222	0.476665	0.0162814	0.0162814	0.0162814	0.129589	0.284702	0.598681	0.416662	0.324738	0.298269	0.0169575	0.052684	0.0180247	0.439527	0.343787	0.211465	C10A4.6	-5.38212	-0.343653	-0.947351	-5.44082	-1.35962	-1.14365	-4.80762	-1.26331	8.45572e-07	4.27512e-06	0.199342	0.433995	0.00686388	0.0188765	0.00208188	0.00827746
WBGene00015692	ugt-25	26.4825	26.7628	24.7793	24.3609	28.2113	24.828	27.0918	27.0918	28.1057	11.1847	14.3368	11.8808	20.3084	21.164	21.8054	51.9321	55.9715	53.4366	15.8199	16.4719	17.3847	22.083	19.515	23.2019	23.1669	25.199	27.6711	ugt-25	-0.016727	0.0767926	-1.07333	-0.30356	1.05148	-0.655266	-0.277151	-0.0408175	0.807724	0.853529	0.260349	0.50704	2.57483e-13	1.00941e-11	1.77179e-09	6.11742e-08
WBGene00015695	ugt-26	17.5931	16.3062	16.5805	57.7969	60.6914	57.2257	15.2505	18.5584	16.9415	9.36045	8.67213	8.563	23.887	23.9496	23.9496	8.6565	7.90221	8.58514	13.0881	12.0738	14.0966	33.4504	32.9936	35.8005	13.6182	13.127	14.5164	ugt-26	1.79861	0.00170637	-0.929594	0.507357	-1.01035	-0.365259	1.01394	-0.294314	1.09578e-23	9.75917e-22	0.978487	0.991588	1.00317e-12	3.52675e-11	7.98649e-06	7.98971e-05
WBGene00015746	C13F10.7	42.3672	41.1719	41.1719	39.5425	39.7995	41.1552	41.6745	27.7444	27.1047	27.2146	27.5579	26.1222	28.6763	28.0092	27.3485	25.6283	26.1054	27.2582	25.6776	25.346	25.4322	24.643	26.2481	27.0632	26.487	27.6113	29.4131	C13F10.7	-0.0507694	-0.39355	-0.625722	-0.569014	-0.656578	-0.705124	-0.680788	-0.580249	0.53096	0.615033	5.39653e-05	0.00462868	8.87744e-08	1.08803e-06	9.12872e-09	2.62916e-07
WBGene00015751	C14A11.6	3.46235	3.6129	3.21039	1.33338	1.35584	1.18946	3.5207	3.19142	3.80784	2.07529	2.61055	2.37327	1.40626	1.53086	1.37969	2.46813	2.10569	2.14845	2.89024	3.0174	2.83228	2.02119	1.49815	2.48707	2.23362	2.52533	3.4384	C14A11.6	-1.41945	0.0273955	-0.552241	-1.26166	-0.630101	-0.236934	-0.836084	-0.355143	1.24281e-08	8.64392e-08	0.821636	0.917584	0.000515	0.00199554	0.0751541	0.155395
WBGene00015756	C14C6.2	10.5353	10.9238	12.4877	1.17421	1.02177	0.884456	10.1466	7.98707	7.55527	7.00087	6.87913	7.42105	0.896232	0.826967	0.66043	10.3365	11.6743	12.1647	7.19595	7.75703	7.65997	1.05608	1.17673	0.911899	10.8784	9.83907	9.4403	C14C6.2	-3.41815	-0.401692	-0.661024	-3.78737	0.0198004	-0.581047	-3.38177	-0.167236	1.47236e-14	2.64705e-13	6.99883e-05	0.00508718	1.14641e-07	1.35902e-06	5.93058e-07	9.42327e-06
WBGene00015759	C14C6.5	30.0158	29.3069	32.0103	3.5207	3.56435	3.21686	23.6963	19.5043	18.5875	17.4254	19.1739	18.3125	3.38851	3.16444	3.71384	11.398	11.2205	9.55317	30.8556	26.6561	28.4765	4.09664	3.77999	3.23016	17.0026	17.3382	16.8437	C14C6.5	-3.13927	-0.566801	-0.73311	-3.15199	-1.51406	-0.0844533	-3.02724	-0.833575	1.35324e-19	5.76022e-18	3.53353e-09	4.7566e-06	4.71512e-11	1.22038e-09	0.194148	0.320906
WBGene00015782	C14F11.7	0.84371	0.559924	0.615502	0.049777	0.142487	0.178866	0.542482	0.209236	0.412165	0.342374	0.341222	0.19592	0.12278	0.140385	0.0162814	0.427577	0.377175	0.334011	0.170646	0.174276	0.34017	0.125671	0.201717	0.0957236	0.222487	0.241803	0.347299	C14F11.7	-2.68437	-0.90136	-1.26072	-3.32464	-0.841512	-1.64287	-2.30433	-1.34273	0.000164892	0.000521808	0.0202968	0.108295	0.00580396	0.016334	0.00140224	0.00598786
WBGene00015783	C15B12.1	5.75237	5.54253	5.33444	4.09952	4.09046	4.75435	6.05369	5.54717	6.51983	2.61322	2.87688	3.02983	3.66831	3.11199	3.52604	2.92001	2.75677	2.64805	4.57252	5.08491	4.56376	4.29643	3.63034	3.71384	4.39285	4.21838	4.24504	C15B12.1	-0.370338	0.117085	-0.967846	-0.69842	-1.009	-0.232568	-0.518856	-0.372954	0.000203101	0.000630093	0.148873	0.365855	4.06734e-10	8.64597e-09	0.0103682	0.0312831
WBGene00015788	C15B12.8	2.65478	2.48025	2.56719	1.5772	2.61322	1.62378	2.45944	2.5805	2.83521	0.918312	1.28237	0.973362	1.99152	1.41709	1.5475	1.37082	2.00722	1.48195	2.33668	2.44365	2.54266	2.39763	2.36419	1.81942	3.1907	2.58381	2.831	C15B12.8	-0.4606	0.0240377	-1.30001	-0.6524	-0.676898	-0.077745	-0.22431	0.152078	0.00789031	0.016907	0.868529	0.939704	1.58545e-06	1.33339e-05	0.604941	0.725353
WBGene00015802	flu-2	137.914	145.433	146.914	38.2454	36.1692	36.1196	151.77	128.82	136.376	82.1168	91.2248	80.8862	42.569	40.2838	40.2187	82.136	82.2172	79.6589	130.268	126.464	127.063	49.0218	45.0564	48.4594	116.939	118.641	119.823	flu-2	-1.95863	-0.047161	-0.761284	-1.80501	-0.81809	-0.163398	-1.59521	-0.274771	4.12911e-25	5.23433e-23	0.28915	0.538113	6.58598e-16	4.08496e-14	0.000931341	0.00425966
WBGene00015803	C15H9.9	92.2711	94.0373	90.6237	37.7046	37.9061	35.8609	99.0919	82.6051	84.4611	64.4207	62.584	60.8154	32.1131	31.224	29.9495	65.3948	62.1531	61.9992	67.281	62.1156	65.8392	35.932	35.4479	33.1193	69.6668	69.3126	69.0071	C15H9.9	-1.3113	-0.0605102	-0.56064	-1.56796	-0.548424	-0.502744	-1.40257	-0.412422	1.00546e-20	5.16624e-19	0.192937	0.426248	2.71976e-12	8.87859e-11	2.43789e-11	1.29082e-09
WBGene00015847	C16C8.9	0.431352	0.744512	0.754237	0.298269	0.204483	0.151511	0.542482	0.537469	0.412165	0.377175	0.20813	0.346131	0.092211	0.140385	0.252514	0.312325	0.377175	0.334011	0.292279	0.133009	0.224709	0.273059	0.234285	0.346131	0.154068	0.174816	0.423735	C16C8.9	-1.52759	-0.309394	-1.02555	-2.06637	-0.849416	-1.54993	-1.14601	-1.45801	0.000928043	0.00249263	0.295292	0.543889	0.00884211	0.0233304	0.000902522	0.00415538
WBGene00015860	C16D9.5	5.61644	6.87337	4.67586	1.77256	1.77363	1.35584	4.73237	3.97528	4.45881	1.82317	1.69779	2.06303	1.34749	1.07359	1.4949	1.19181	1.63246	1.51189	2.17995	1.76151	2.02341	1.08916	1.2149	1.07104	2.05958	2.22565	2.48357	C16D9.5	-1.77952	-0.36205	-1.58693	-2.11931	-1.94731	-1.49079	-2.30608	-1.31907	4.28488e-11	4.41897e-10	0.0028579	0.0318161	2.32189e-10	5.20986e-09	2.44442e-10	1.03542e-08
WBGene00015879	C17B7.5	9.64285	10.6383	8.5901	1.22091	1.18946	1.50016	8.5901	9.72863	11.8376	5.62388	4.97267	5.29401	1.43741	1.35242	1.4949	5.54379	5.38678	4.78279	6.90887	7.62266	6.84428	2.23024	1.83989	1.70285	7.6516	6.82085	8.10297	C17B7.5	-2.91404	0.0508312	-0.861118	-2.77033	-0.885146	-0.433301	-2.33488	-0.353892	4.83706e-14	7.95504e-13	0.568585	0.766663	1.22801e-08	1.88734e-07	0.000115009	0.000730829
WBGene00015894	acdh-2	6.20163	5.57176	5.28251	0.743452	0.872637	0.974606	5.33444	6.4588	5.5329	0.980287	0.963501	1.24103	1.04747	0.62757	0.868797	1.00788	0.782896	0.537469	2.39763	3.0174	2.91936	1.737	1.87698	1.89723	5.35667	4.60762	4.67198	acdh-2	-2.76692	0.0192065	-2.44559	-2.80954	-2.98825	-1.05867	-1.64929	-0.2253	1.47561e-12	1.9096e-11	0.845545	0.929683	3.92442e-12	1.23694e-10	3.80226e-09	1.19626e-07
WBGene00015896	C17C3.15	2.1354	2.32367	2.638	2.32726	2.02224	1.89832	2.06512	1.66905	1.52738	1.65746	1.21651	1.88892	1.79548	2.06656	1.4085	2.0085	2.04643	2.06303	2.26852	1.52607	1.74662	1.33564	1.53418	1.6095	2.16333	1.43608	2.20615	C17C3.15	-0.168665	-0.422531	-0.569996	-0.422576	-0.20045	-0.344551	-0.653385	-0.309695	0.315039	0.401492	0.0206518	0.109447	0.00494151	0.0142562	0.0556894	0.123126
WBGene00015912	fbxc-50	68.767	67.4685	70.3735	54.3688	56.0145	55.9626	70.8627	52.0897	50.8325	47.3953	47.7948	48.1649	44.3642	42.2663	42.7851	47.8273	48.6679	51.5181	48.4334	50.0217	45.6538	43.6245	46.7027	40.8747	48.4154	49.4574	48.5134	fbxc-50	-0.31315	-0.262919	-0.526164	-0.674238	-0.478872	-0.520366	-0.652207	-0.49651	9.28785e-05	0.00030972	0.00059781	0.0138867	4.62207e-08	6.16998e-07	4.69411e-08	1.10915e-06
WBGene00015924	C17H11.4	0.249852	0.371314	0.378342	0.567005	0.371314	0.366258	0.284702	0.146522	0.0169575	0.108754	0.049777	0.127199	0.175358	0.140385	0.100299	0.129589	0.0682193	0.178866	0.0728896	0.0957236	0.12278	0.236835	0.127199	0.346131	0.12278	0.174816	0.176446	C17H11.4	0.409052	-1.78144	-1.84011	-1.2409	-1.45464	-1.76388	-0.595847	-1.0478	0.316143	0.402497	0.00959182	0.0670887	0.0102111	0.0264364	0.00994719	0.0302651
WBGene00015946	C18A3.10	1.18846	1.67496	2.2583	2.07529	2.18328	2.5241	1.18634	1.32981	1.76428	1.1227	0.899233	1.18395	1.29609	1.86496	1.51896	2.05374	1.56669	1.60137	0.935404	0.94589	1.28112	1.53769	1.87698	1.81942	1.58681	1.62107	1.66905	C18A3.10	0.457196	-0.235815	-0.632855	-0.0858727	0.0588018	-0.667749	0.0783821	-0.0121924	0.0141798	0.02827	0.233941	0.476886	0.00852962	0.0226747	0.00521832	0.0177978
WBGene00015950	C18A11.4	1.04747	1.14883	1.08565	0.049777	0.052684	0.0169575	1.36511	1.18846	0.97068	0.737968	0.833198	0.506477	0.0654893	0.0293713	0.07642	1.32867	0.851439	0.819985	0.97068	1.22091	0.847262	0.052684	0.0169575	0.0180247	1.29495	1.07104	1.85052	C18A11.4	-5.06731	0.102554	-0.720237	-4.49875	-0.198253	-0.135601	-5.57296	0.325505	4.96097e-06	2.14794e-05	0.630911	0.810737	0.0109783	0.0281031	0.548425	0.677514
WBGene00016013	C23G10.6	6.782	6.73047	5.9377	5.40613	6.13384	5.46254	7.05757	5.65602	5.70818	2.76029	2.43144	2.8657	4.79129	4.09664	4.48588	4.6418	4.57835	4.60991	3.79744	4.10984	3.68592	4.46579	4.64922	4.25192	4.93868	4.69351	5.07465	C23G10.6	-0.196737	-0.0803135	-1.26781	-0.54178	-0.489693	-0.747635	-0.535354	-0.40218	0.027429	0.0503126	0.336158	0.582465	8.46087e-12	2.55187e-10	1.58838e-08	4.2901e-07
WBGene00016023	prmt-6	6.52334	6.46325	5.11824	8.82207	8.62746	9.40583	6.72251	5.08798	6.15075	3.25557	3.71284	3.63034	6.12062	5.05924	5.23531	2.9888	3.14301	3.54658	3.79744	3.74834	4.52201	6.11198	6.45228	6.90261	4.17009	4.84184	4.51513	prmt-6	0.575476	-0.0135176	-0.763941	-0.136944	-0.889031	-0.582741	0.107125	-0.413586	1.65352e-06	7.91747e-06	0.895363	0.95332	1.0904e-06	9.6371e-06	2.44104e-05	0.000198844
WBGene00016027	C23H5.8	47.8177	52.2827	50.7243	1.79789	1.62518	1.4085	41.8261	37.8018	38.9053	27.0544	30.7307	26.6458	2.06242	2.15887	1.76998	16.1977	15.712	15.8661	34.6016	36.405	35.095	2.36235	2.83571	2.36419	41.105	38.835	39.9929	C23H5.8	-4.95767	-0.345853	-0.839379	-4.64914	-1.65692	-0.506518	-4.31334	-0.328705	3.4939e-22	2.33379e-20	3.54897e-08	2.46984e-05	4.79018e-16	3.03617e-14	2.19823e-11	1.18194e-09
WBGene00016048	C24B9.3	99.9006	105.809	107.017	37.4871	34.2973	39.633	105.009	74.8647	75.823	37.6782	39.4652	42.4349	19.3462	18.8634	17.7543	31.4616	32.5536	34.3153	63.9435	66.1799	65.8392	26.6801	30.8556	25.6897	81.9298	72.1373	63.853	C24B9.3	-1.48696	-0.304468	-1.38232	-2.47489	-1.66226	-0.672812	-1.90363	-0.525871	2.16807e-15	4.47183e-14	0.000880099	0.0166509	1.27676e-14	6.19373e-13	1.31338e-08	3.62056e-07
WBGene00016052	dod-3	4.31472	4.35359	4.24684	107.607	117.345	114.047	4.92736	5.97832	4.60126	0.643159	0.374786	0.377175	71.3978	63.917	63.5584	0.893399	0.913106	1.12962	4.40671	3.62511	3.11327	87.3646	84.5607	62.9636	6.04454	5.86291	4.79129	dod-3	4.68981	0.258222	-3.19367	3.92251	-2.09325	-0.21236	4.15816	0.362254	2.88124e-21	1.64876e-19	0.16728	0.392483	6.95327e-06	4.78626e-05	0.296277	0.437761
WBGene00016061	hpo-15	88.7948	93.436	93.0043	69.1137	65.5769	63.3505	83.863	87.1962	92.571	29.945	31.7372	29.8163	35.5086	35.4117	34.165	31.3263	27.8336	29.0797	60.5645	53.8076	55.4543	59.3655	62.3596	58.8755	59.661	58.7126	57.0436	hpo-15	-0.472961	-0.0634983	-1.58899	-1.38743	-1.6453	-0.694464	-0.606079	-0.648869	1.1972e-11	1.33967e-10	0.137623	0.349685	3.0826e-23	8.63475e-21	1.97351e-15	2.48362e-13
WBGene00016063	delm-2	1.32637	1.29609	1.19181	0.765711	0.671813	0.719389	1.29959	1.01645	1.30454	0.609498	0.470739	0.814351	0.376178	0.520555	0.628795	0.469577	0.567005	0.715287	1.10134	0.439527	0.733426	0.631653	0.341222	0.786693	0.760427	1.30085	1.07803	delm-2	-0.806421	-0.0863209	-1.01128	-1.34165	-1.10111	-0.789519	-1.20817	-0.308854	0.00545852	0.0121739	0.695047	0.847806	0.00198175	0.00646331	0.00687708	0.022366
WBGene00016064	acd-1	3.05401	3.36469	3.07979	1.15263	0.996025	0.807674	2.45944	2.71835	3.13819	1.75873	1.32375	1.09046	1.15263	0.936158	1.06164	1.07869	1.04526	1.30085	2.48835	2.44365	2.67642	0.559924	1.17673	1.07104	1.70091	1.73368	1.88892	acd-1	-1.69061	-0.202236	-1.23064	-1.60333	-1.47274	-0.318829	-1.85185	-0.837125	5.53109e-09	4.07373e-08	0.127189	0.333758	1.59346e-07	1.80637e-06	0.0245191	0.0637269
WBGene00016071	C24H12.1	1.22091	1.18521	1.43741	0.567005	0.401299	0.34017	1.32981	1.25609	1.15931	0.883033	0.735531	1.09046	0.646365	0.702891	1.0047	1.19181	0.879465	1.07104	0.729335	0.826354	0.698364	0.842509	0.939661	1.45425	1.00788	0.979768	1.32506	C24H12.1	-1.57647	-0.0322429	-0.512237	-0.748037	-0.310148	-0.780456	-0.318313	-0.228975	6.7704e-06	2.85323e-05	0.858041	0.935479	0.0199614	0.0469805	0.00130817	0.00564308
WBGene00016110	npr-11	1.22091	0.707884	1.19181	0.623883	0.204483	0.392683	1.29959	0.746402	1.19437	0.513777	0.735531	0.506477	0.436003	0.62757	0.721714	0.469577	0.439527	0.479036	0.87529	0.867561	0.626464	0.596149	0.447775	0.306282	0.902609	0.741324	0.698364	npr-11	-1.40807	0.0329062	-0.818241	-0.806415	-1.12375	-0.377719	-1.18306	-0.39157	0.000726808	0.00200293	0.891982	0.951579	0.0135187	0.0335926	0.169105	0.289985
WBGene00016174	C27H5.4	13.0163	12.4557	14.1716	14.6513	15.0002	13.576	13.0881	16.9053	17.0481	5.44692	5.62122	5.74941	12.9089	13.7326	14.3644	6.13384	5.08491	5.49677	9.43712	10.1783	9.88621	13.9491	13.4948	16.4463	9.5031	10.6125	12.339	C27H5.4	0.125604	0.234232	-1.24326	0.0467468	-1.26409	-0.431445	0.133115	-0.298791	0.168997	0.239394	0.0119266	0.0766296	4.19362e-11	1.09355e-09	0.000128051	0.000797371
WBGene00016179	C28C12.3	0.973983	1.00337	1.15628	0.765711	1.02177	1.15771	0.976111	0.907391	0.934651	0.609498	0.928906	0.506477	1.1227	0.936158	0.814351	1.19181	0.851439	0.909788	0.481012	0.365129	0.44667	0.559924	0.721714	0.75067	0.513777	0.545169	0.766279	C28C12.3	-0.127547	-0.151544	-0.687921	-0.129656	-0.118546	-1.29516	-0.65594	-0.814575	0.51646	0.60137	0.439783	0.675124	0.00563525	0.0159575	5.57062e-05	0.0004006
WBGene00016195	C28H8.4	128.583	120.561	136.578	124.789	122.01	128.062	135.528	100.521	94.7451	87.7771	89.3645	90.2459	92.2066	91.9434	89.5965	90.8272	97.8239	97.7538	97.4791	88.975	88.921	92.9643	92.9387	86.0361	94.2339	96.7718	92.0678	C28H8.4	-0.0402253	-0.235524	-0.526375	-0.49272	-0.426521	-0.483802	-0.500926	-0.444812	0.574515	0.654532	0.00264765	0.0302874	9.25171e-08	1.12754e-06	3.50653e-07	6.10199e-06
WBGene00016217	C29F9.2	2.19904	1.32981	1.60359	1.9849	1.95317	1.47381	1.76935	1.63246	1.23253	0.951955	0.963501	0.781823	1.29609	1.62772	1.63369	0.851439	0.721714	0.909788	1.25092	1.06164	0.920663	1.29897	1.33165	1.65869	1.58681	1.13913	1.43306	C29F9.2	0.0877879	-0.135873	-0.917682	-0.164583	-1.02737	-0.646355	-0.261023	-0.301833	0.613676	0.688839	0.450128	0.683217	0.000374784	0.0015192	0.00381807	0.0137712
WBGene00016274	C30G12.2	150.959	167.641	149.109	4.6999	4.32671	4.06666	191.037	210.342	215.833	41.5192	47.8447	43.5568	4.58088	4.94388	5.0661	92.9843	95.0557	89.3251	56.8651	50.8248	54.1889	4.85194	5.55334	5.2138	166.314	166.822	185.452	C30G12.2	-5.15288	0.400478	-1.81487	-5.00199	-0.751868	-1.52648	-4.90319	0.149865	9.96478e-25	1.14608e-22	3.83443e-09	4.7566e-06	4.76217e-23	1.2531e-20	1.14874e-21	4.63959e-19
WBGene00016309	sdz-4	2.05706	1.74784	2.11503	0.514968	0.841534	0.656635	1.76935	2.5805	2.3629	1.43259	1.75873	1.05985	0.807674	0.909788	0.925647	1.77937	1.75499	1.72157	1.10134	1.29495	1.44902	1.01875	0.753274	1.33114	1.46724	2.11827	1.641	sdz-4	-1.63647	0.160413	-0.535395	-1.18876	-0.178444	-0.653064	-1.01916	-0.197284	1.2877e-06	6.28539e-06	0.328603	0.575403	0.00957668	0.0250366	0.00233223	0.00910404
WBGene00016361	drd-10	6.14349	5.68812	5.80371	3.05401	2.26852	2.55786	7.74635	12.0047	10.7794	3.21686	3.74184	3.22069	1.1227	1.12379	0.973362	6.58185	5.71647	7.08018	7.67587	6.59015	7.84488	1.63826	2.33053	2.40223	8.50146	8.54182	9.30527	drd-10	-1.16017	0.76197	-0.798575	-2.44712	0.130702	0.325226	-1.49755	0.575118	2.59498e-07	1.44307e-06	5.99825e-07	0.000211974	2.4588e-05	0.000142103	0.0145308	0.0412348
WBGene00016431	C35A11.4	16.8627	15.712	16.477	10.1571	9.43459	8.96818	14.3345	12.9423	13.5227	9.28782	7.52851	8.79078	4.34588	4.57036	4.54868	4.96275	4.76434	6.05891	12.0539	12.4163	11.3916	9.53867	9.16612	8.48379	12.5055	11.0029	10.2791	C35A11.4	-0.775476	-0.266565	-0.938111	-1.85741	-1.62764	-0.452034	-0.844425	-0.540981	7.70818e-11	7.62781e-10	0.000614988	0.01411	3.73985e-12	1.19174e-10	9.02444e-07	1.33158e-05
WBGene00016450	clec-5	32.5478	33.6833	32.5594	326.78	332.496	320.184	36.8826	35.5888	35.8366	11.2266	12.2688	11.5087	262.664	265.947	266.666	22.3497	22.6739	20.2612	23.5025	19.66	21.0033	231.829	222.848	233.238	22.579	21.9391	24.1483	clec-5	3.31041	0.133652	-1.49772	3.00991	-0.602078	-0.61997	2.79993	-0.525893	3.61095e-34	1.8731e-30	0.00953657	0.0668368	1.17635e-19	1.53068e-17	3.48852e-12	2.25223e-10
WBGene00016451	clec-6	0.641366	0.371314	0.413184	3.55032	3.59272	3.70541	0.479036	0.176446	0.299501	0.171705	0.274186	0.258512	2.38801	2.18328	2.60208	0.129589	0.224709	0.240311	0.26335	0.252514	0.155218	3.80135	3.63034	3.58922	0.222487	0.312325	0.246492	clec-6	2.92919	-0.660985	-1.00039	2.32849	-1.2379	-1.0795	2.95567	-0.844792	8.09293e-12	9.37625e-11	0.0486737	0.184245	0.0103549	0.0267251	0.00614476	0.0203635
WBGene00016455	C35E7.3	2.65478	2.8015	2.85849	1.1086	1.24867	1.32981	2.31434	2.448	2.46692	1.62518	2.09537	1.88892	1.90703	1.57916	1.79919	2.51129	2.2821	2.23478	2.12045	2.05656	1.84394	1.98322	1.83989	1.85373	2.92311	1.77411	2.11431	C35E7.3	-1.18944	-0.202488	-0.575801	-0.661336	-0.250909	-0.466006	-0.551867	-0.32014	7.5083e-08	4.59629e-07	0.114172	0.312688	0.000331885	0.00136844	0.00168873	0.00697294
WBGene00016474	C36C5.5	10.8016	10.1026	9.90456	14.5846	14.2387	13.7893	10.9264	10.0633	8.67396	6.88305	6.55318	6.45641	8.1261	8.47079	7.9542	6.74247	6.97785	6.76015	9.0608	10.1044	9.96976	10.8419	10.2424	10.2826	7.34057	8.86934	9.01196	C36C5.5	0.468051	-0.0562897	-0.632302	-0.326845	-0.588261	-0.0868338	0.0262335	-0.29517	2.43627e-07	1.36135e-06	0.450118	0.683217	3.41417e-08	4.7096e-07	0.254117	0.392755
WBGene00016483	C36C5.14	0.456068	0.781823	0.819985	0.917178	0.841534	1.22091	0.646365	0.404605	0.44916	0.240311	0.240311	0.258512	0.454863	0.204483	0.341797	0.427577	0.165854	0.151511	0.63562	0.594923	0.626464	0.44916	1.00664	0.708856	0.543824	0.513777	0.698364	C36C5.14	0.581616	-0.425647	-1.44527	-1.07995	-1.66291	-0.085293	0.0557799	-0.184321	0.0348667	0.0619024	0.181032	0.411342	0.00211454	0.00683476	0.772446	0.853539
WBGene00016484	C36C5.15	0.279805	0.165854	0.151511	0.423735	0.287354	0.27634	0.178866	0.176446	0.167091	0.0808829	0.084508	0.0957236	0.092211	0.115381	0.222487	0.0557608	0.0493084	0.0927874	0.26335	0.211465	0.18888	0.167091	0.269248	0.140385	0.049777	0.049777	0.049777	C36C5.15	0.748558	-0.14675	-1.12672	-0.543859	-1.5588	0.189354	-0.0384471	-1.92093	0.0314651	0.0565981	0.690735	0.845098	0.0199781	0.047007	0.594399	0.717318
WBGene00016493	C37A2.7	713.568	683.65	691.462	549.598	570.408	575.714	713.568	430.349	455.294	397.355	435.081	417.081	351.374	348.649	330.181	398.139	400.109	422.347	436.453	433.768	430.349	366.668	347.24	303.186	476.605	474.346	402.158	C37A2.7	-0.30154	-0.421297	-0.741671	-1.01908	-0.774062	-0.682968	-1.03885	-0.62986	0.00444127	0.0101663	0.000181702	0.00781093	4.94866e-08	6.55057e-07	1.91543e-07	3.70438e-06
WBGene00016545	C40A11.2	1.11114	0.851439	0.754237	0.347299	0.204483	0.34017	1.01645	0.47777	1.12688	0.479036	0.407267	0.567005	0.482202	0.59979	0.279805	0.664084	0.721714	0.413184	0.416662	0.515529	0.409693	0.342374	0.341222	0.786693	0.934651	0.60365	0.559924	C40A11.2	-1.64571	-0.154341	-0.908128	-1.04744	-0.657196	-1.0356	-1.05348	-0.403605	0.000758099	0.00207795	0.583285	0.776774	0.0164594	0.0398398	0.00753803	0.024081
WBGene00016556	math-21	0.641366	0.744512	0.513777	1.72157	1.38094	1.1086	0.511421	0.67057	0.672945	0.171705	0.308848	0.127199	1.07009	1.15263	1.21588	0.312325	0.196961	0.334011	0.355563	0.439527	0.549909	0.94589	1.53418	1.03316	0.616643	0.545169	0.559924	math-21	1.16344	-0.0294833	-1.7393	0.872718	-1.18807	-0.51121	0.885739	-0.122561	2.28992e-05	8.68889e-05	0.909705	0.960942	0.000289872	0.00121835	0.0903746	0.179288
WBGene00016558	C41A3.1	35.1941	38.7156	33.6104	12.4811	10.4127	12.681	32.2388	38.5809	43.9141	24.91	24.0326	23.5075	15.4138	16.9282	15.6209	22.8365	22.5238	23.0447	30.6701	29.8927	31.0177	18.0776	19.3498	22.0241	32.9023	30.5356	33.5613	C41A3.1	-1.59815	0.0819486	-0.568297	-1.16308	-0.649565	-0.227394	-0.864861	-0.146314	7.71092e-16	1.71687e-14	0.266206	0.513236	1.06881e-07	1.27661e-06	0.00547934	0.0185968
WBGene00016575	C41H7.5	6.55433	7.80615	7.17279	5.38428	5.78797	6.38265	6.55433	4.67685	4.67078	4.37227	5.23661	4.8271	5.40507	4.87245	4.73237	4.92107	4.94263	5.86416	5.34595	4.53326	5.15673	5.20679	4.84812	4.37155	5.87149	5.4001	4.96778	C41H7.5	-0.293711	-0.44038	-0.568641	-0.510677	-0.439165	-0.504602	-0.562078	-0.399575	0.00984983	0.0205653	0.000342828	0.0105217	3.17503e-05	0.000178103	9.9736e-05	0.000650951
WBGene00016594	C42D4.1	179.403	167.832	170.812	88.671	91.5866	87.4986	165.263	193.802	186.381	95.2183	112.257	93.8911	67.281	68.018	68.8043	100.385	104.68	101.69	147.117	133.954	144.831	63.2655	62.2987	63.0239	140.31	147.52	150.346	C42D4.1	-0.952727	0.0704164	-0.787977	-1.34418	-0.755828	-0.28256	-1.45813	-0.242393	6.2398e-17	1.70056e-15	0.164228	0.388702	6.70002e-15	3.47341e-13	5.50449e-06	5.88163e-05
WBGene00016595	C42D4.2	8.97161	10.391	8.49076	1.44118	1.52738	1.18946	9.48384	9.48384	10.1687	2.76029	3.28111	2.831	1.04747	0.936158	1.0047	3.75996	2.95636	3.06189	6.7952	6.35694	5.96871	1.63826	1.57111	1.29495	7.52851	8.63804	9.01196	C42D4.2	-2.7472	0.071374	-1.65195	-3.22429	-1.52596	-0.533418	-2.62328	-0.141367	1.84444e-15	3.86398e-14	0.358984	0.602947	5.52493e-14	2.38093e-12	1.09253e-06	1.55016e-05
WBGene00016614	trpp-12	28.0742	27.7599	27.591	11.1907	11.1562	10.2851	28.8977	25.5377	27.1593	8.19637	9.92733	8.8369	10.9841	10.0589	8.60371	11.9122	11.8482	12.7984	15.8613	14.484	14.9716	13.7488	12.7828	13.3851	21.4289	20.8289	20.4121	trpp-12	-1.35026	-0.0337473	-1.63035	-1.49197	-1.18555	-0.876417	-1.06179	-0.412226	8.0156e-18	2.60687e-16	0.538388	0.745332	7.21706e-19	8.30057e-17	3.53202e-14	3.52532e-12
WBGene00016627	C44B7.5	151.482	147.195	148.256	27.6041	22.5595	24.9694	148.827	147.039	149.227	91.2462	97.6721	88.4237	34.4516	36.7248	35.9223	96.4439	91.3292	91.2034	58.5661	58.8497	55.8316	34.7614	38.6085	38.3762	68.436	62.2355	71.0619	C44B7.5	-2.57257	-0.00629003	-0.690924	-2.06186	-0.682203	-1.36774	-2.00334	-1.15078	3.69537e-27	1.00277e-24	0.88374	0.947753	3.65943e-15	1.9676e-13	3.20373e-22	1.50376e-19
WBGene00016635	C44B11.6	4.70202	4.58088	5.02507	3.46942	3.61404	3.38554	4.73237	3.75545	4.04217	3.12004	3.11199	2.8657	3.56628	3.33243	3.18349	2.78785	2.95636	2.50531	3.08322	2.98414	3.33729	3.87929	4.09605	2.79578	3.83687	3.73262	4.00899	C44B11.6	-0.449047	-0.195403	-0.653742	-0.502257	-0.798341	-0.603368	-0.406616	-0.305284	0.000182687	0.000571973	0.0553197	0.200195	2.83676e-06	2.20924e-05	5.98466e-06	6.29531e-05
WBGene00016636	perm-2	907.777	903.849	915.32	593.437	571.81	626.84	921.334	754.126	698.077	579.164	586.954	599.948	476.605	452.44	439.717	609.641	626.84	650.544	631.601	589.152	609.641	541.948	573.828	469.092	688.868	639.747	613.738	perm-2	-0.606342	-0.208176	-0.625954	-0.994019	-0.530032	-0.57426	-0.783924	-0.490646	3.32994e-10	2.98406e-09	0.00250243	0.0294243	1.93556e-10	4.42883e-09	1.03924e-09	3.78376e-08
WBGene00016644	abhd-3.2	73.5038	78.6254	73.2197	21.2632	20.1898	20.1004	79.9151	70.247	73.9264	43.0349	46.8986	43.3335	18.7908	18.6843	15.9344	34.4922	32.0156	33.716	66.8979	67.8224	68.5561	27.2647	24.4408	24.1507	62.1049	65.5903	62.4898	abhd-3.2	-1.86779	-0.00806248	-0.75751	-2.07446	-1.16866	-0.147291	-1.56763	-0.243055	4.78407e-23	3.7595e-21	0.862925	0.937339	7.06002e-15	3.62756e-13	0.00409075	0.0145403
WBGene00016658	C45B2.1	204.406	201.29	200.075	39.9664	39.3339	37.9873	216.927	193.654	203.423	104.708	120.686	98.7412	30.3946	29.0212	30.0687	101.324	105.67	106.257	172.127	159.513	173.954	55.8419	51.7383	52.0327	166.916	175.338	176.625	C45B2.1	-2.36744	0.0179503	-0.909158	-2.75905	-0.950434	-0.260909	-1.92366	-0.223916	1.82204e-26	3.55543e-24	0.695157	0.847809	2.18198e-17	1.86672e-15	4.78416e-06	5.21573e-05
WBGene00016669	ilys-2	2.85005	3.27199	2.11503	9.68947	10.549	9.78695	3.65695	2.92311	3.6722	0.240311	0.308848	0.163406	1.09473	1.49699	1.5475	0.392683	0.626464	0.537469	0.935404	1.22091	1.09529	3.37285	4.09605	4.25192	1.25337	1.17798	1.18521	ilys-2	1.89914	0.333368	-3.61985	-0.994977	-2.41024	-1.34782	0.523528	-1.17092	5.42221e-15	1.04864e-13	0.0194658	0.105579	2.62992e-08	3.74069e-07	4.33029e-07	7.28016e-06
WBGene00016670	ilys-3	3.13111	2.48025	2.2583	1.72157	2.26852	1.87083	3.18106	2.33494	3.90602	0.545169	1.24967	0.907391	0.754237	0.807674	0.628795	0.814351	1.18748	1.27082	1.49143	1.76151	1.9506	0.525336	0.481012	0.467086	2.05958	2.26109	2.0687	ilys-3	-0.435911	0.223394	-1.60655	-1.83371	-1.25341	-0.606463	-2.39985	-0.293557	0.0236181	0.0441903	0.169964	0.396434	2.7049e-06	2.1189e-05	0.00362119	0.0131623
WBGene00016671	C45G7.4	1.92682	1.64162	1.91524	1.62518	1.24867	2.15718	1.52494	1.40056	1.27082	1.35842	0.928906	1.40626	1.87337	1.70285	1.82806	1.73755	1.36952	1.63369	1.39319	1.56565	1.59895	2.18928	2.36419	1.65869	1.32867	1.55997	1.28338	C45G7.4	-0.160551	-0.383011	-0.580892	-0.024071	-0.222093	-0.273743	0.182163	-0.395743	0.337987	0.425768	0.0332612	0.145598	0.00446063	0.0130858	0.116942	0.218826
WBGene00016681	C45G9.10	1.25092	0.924219	0.652248	0.567005	0.623883	0.481012	0.682401	0.746402	0.934651	0.737968	0.439527	0.476665	0.646365	0.702891	0.59979	0.589691	0.819985	0.715287	0.59979	0.746979	0.733426	0.596149	0.654265	0.953094	0.513777	0.513777	0.48903	C45G9.10	-0.728018	-0.242096	-0.784309	-0.497871	-0.372578	-0.42301	-0.377656	-0.862504	0.00694728	0.0151271	0.271993	0.519455	0.00541827	0.0154514	0.0761044	0.156842
WBGene00016705	C46C11.2	19.0099	19.3768	18.7908	10.4786	10.6957	11.0824	20.7775	19.5043	19.8598	8.19637	8.5995	8.21758	8.91826	9.0502	8.7848	7.26174	7.47738	7.05045	13.1534	15.3907	13.8321	10.6993	10.7855	11.2832	14.0675	14.4053	14.8622	C46C11.2	-0.829324	0.0733351	-1.1965	-1.09725	-1.39634	-0.440965	-0.807868	-0.400806	3.50799e-15	6.96267e-14	0.124034	0.329173	4.52033e-18	4.48597e-16	1.5742e-09	5.50161e-08
WBGene00016714	C46F2.1	9.67019	7.9428	8.71316	1.15263	1.40723	1.04747	9.08593	9.05092	8.86881	5.75364	6.25651	4.94326	1.40626	1.47233	1.4949	4.92107	5.08491	5.20544	8.99168	8.47553	7.5121	1.63826	1.27358	1.65869	9.69266	9.39846	9.84432	C46F2.1	-2.88024	0.0368835	-0.648517	-2.59056	-0.788972	-0.0766902	-2.54467	0.135193	1.64101e-15	3.47978e-14	0.630483	0.810542	5.62096e-08	7.31778e-07	0.334276	0.477887
WBGene00016728	C46H11.2	14.2326	14.6092	13.3988	5.95424	5.43162	5.60074	14.0675	16.9537	14.8312	9.87688	9.48672	8.43337	6.19184	6.08394	6.60716	6.37444	6.54319	7.0166	14.309	14.7339	13.0568	7.45306	6.3475	8.11648	9.25272	10.3616	12.0477	C46H11.2	-1.31318	0.116411	-0.611198	-1.16524	-1.08077	-0.00553402	-0.963633	-0.424885	3.58832e-13	5.07879e-12	0.140034	0.35347	1.67531e-07	1.88318e-06	0.944416	0.966852
WBGene00016738	C47D2.1	0.973983	0.633246	0.819985	1.01645	0.943338	1.02501	0.714778	0.404605	0.59979	0.171705	0.534617	0.28854	0.376178	0.520555	0.513777	0.776628	0.75067	0.715287	0.386511	0.211465	0.37194	0.377175	0.833198	0.467086	0.580219	0.209236	0.176446	C47D2.1	0.305475	-0.52587	-1.41462	-0.784107	-0.109385	-1.32814	-0.586224	-1.51534	0.245953	0.32812	0.092844	0.274875	0.00188049	0.00616524	0.00222506	0.00875456
WBGene00016752	C48E7.7	1.28464	1.32981	0.851439	1.13025	1.32867	0.884456	1.04747	0.119023	0.231815	0.171705	0.140385	0.19592	0.12278	0.115381	0.192078	0.0557608	0.0682193	0.0927874	0.0728896	0.133009	0.0169575	0.309995	0.0899412	0.221458	0.049777	0.084508	0.211465	C48E7.7	-0.0395047	-1.86537	-2.74261	-3.02611	-3.9741	-4.36633	-2.6367	-3.55912	0.893136	0.920084	0.000805123	0.0158174	0.000432933	0.00171622	0.00029218	0.0015873
WBGene00016756	C49A9.2	17.5819	17.7899	16.9718	16.4539	17.3237	15.7591	18.0238	21.363	22.197	8.8369	9.69529	10.2566	11.0899	11.439	13.1222	12.7728	13.1538	12.4675	14.0527	12.9809	14.7704	18.1147	18.7396	20.0235	18.1673	19.1374	19.2836	C49A9.2	-0.0803938	0.226345	-0.863133	-0.561823	-0.448489	-0.324561	0.115337	0.112615	0.253744	0.336266	0.00184888	0.0247758	2.28799e-11	6.26743e-10	0.000101695	0.000660772
WBGene00016763	C49A9.9	14.8923	14.3379	13.6924	32.1559	30.7458	29.9681	14.6513	14.8622	14.7339	10.3654	10.3718	9.39628	23.887	23.887	23.7246	12.2504	13.7404	13.3373	11.8482	12.2959	12.0826	24.725	23.5516	25.2365	14.4603	13.9353	14.5558	C49A9.9	1.1145	0.0438463	-0.514763	0.7361	-0.123172	-0.246015	0.773555	0.000303013	6.74051e-20	2.98628e-18	0.409881	0.650598	1.61698e-09	3.02609e-08	0.000122941	0.000772475
WBGene00016877	C52D10.3	37.7131	43.2564	40.1753	32.964	31.9743	32.1066	39.106	33.3265	36.7536	10.4328	10.4952	11.281	12.6939	12.5647	11.6235	13.6961	13.209	14.8355	19.6445	20.4899	19.4032	24.643	25.4682	22.7343	27.7143	26.2115	26.3606	C52D10.3	-0.313998	-0.148351	-1.90206	-1.7079	-1.52923	-1.02025	-0.725373	-0.58861	2.27832e-06	1.05739e-05	0.00765594	0.0585214	6.92787e-21	1.14587e-18	2.21979e-16	3.32337e-14
WBGene00016880	fbxb-95	1.16041	1.14883	0.920663	0.423735	0.423735	0.34017	0.94589	0.87529	0.709999	0.573975	0.534617	0.506477	0.376178	0.520555	0.484815	0.893399	0.879465	0.84371	0.699597	0.67057	0.513777	0.413184	0.557617	0.176446	0.866587	0.706068	0.909262	fbxb-95	-1.41695	-0.340832	-0.982382	-1.21528	-0.294868	-0.766828	-1.5605	-0.379491	1.896e-05	7.30919e-05	0.0908094	0.27149	0.000410153	0.00163713	0.0019002	0.00765191
WBGene00016886	fbxb-96	0.816639	1.07489	1.29722	0.269248	0.26335	0.27634	1.15263	1.01645	1.12688	0.777282	0.665602	0.698364	0.405182	0.386511	0.431352	0.973983	0.439527	0.772963	0.84371	0.632269	0.663592	0.486198	0.591483	0.513777	0.795519	0.949999	0.942246	fbxb-96	-1.95942	0.0786378	-0.549068	-1.3616	-0.612523	-0.542888	-0.978794	-0.218161	2.94122e-06	1.33264e-05	0.672946	0.835754	0.019176	0.0453903	0.0183411	0.0502808
WBGene00016892	C53A3.2	8.61519	9.03041	8.19995	74.5066	76.2482	70.0963	8.28492	7.22834	6.18526	1.43259	2.06303	1.66143	23.6915	23.73	24.3395	1.92819	1.69414	2.29126	3.38491	3.57428	3.00825	37.0986	36.0993	39.2175	4.66523	4.7654	4.51513	C53A3.2	3.09531	-0.253227	-2.33601	1.47391	-2.12567	-1.37476	2.11841	-0.886478	1.46646e-26	3.0319e-24	0.00750515	0.0577512	5.41194e-14	2.33804e-12	2.71449e-12	1.7857e-10
WBGene00016900	C53C11.2	1.84833	1.52793	1.81236	2.17026	2.26852	2.29126	1.86853	1.92243	1.27082	0.479036	1.42184	0.973362	2.23695	1.86496	1.9425	0.776628	1.43259	1.10134	0.84371	1.14768	1.16429	1.53769	1.95375	1.89723	0.684565	1.4621	1.04526	C53C11.2	0.369559	-0.046184	-0.968569	0.214149	-0.65867	-0.740538	0.0441461	-0.758077	0.0821033	0.129297	0.833319	0.923859	0.00238758	0.00761388	0.00836786	0.0262651
WBGene00016906	C53D5.5	28.4633	28.5325	30.5004	36.3731	34.3617	36.4313	31.2933	25.1684	24.0714	18.534	20.8251	21.2566	30.7355	30.7099	28.9837	19.4714	19.0822	20.3276	23.8332	22.8024	21.8585	28.9837	29.528	27.2647	23.1984	25.429	23.0388	C53D5.5	0.293228	-0.124214	-0.526729	0.0490401	-0.567459	-0.350045	-0.0246942	-0.286981	7.27789e-05	0.000248126	0.0691893	0.229885	4.83214e-08	6.42571e-07	2.03984e-05	0.00017172
WBGene00016912	clec-86	7.86673	7.14131	7.42447	2.21852	1.85854	2.8391	6.82962	5.85578	6.99486	0.412165	0.500479	0.258512	1.56274	1.49699	1.60137	0.814351	0.507819	0.793842	2.00031	2.01088	1.98548	1.77533	2.66749	2.26278	3.37081	2.90064	3.05154	clec-86	-1.72984	-0.198174	-4.36269	-2.27983	-3.46603	-1.91258	-1.77232	-1.27558	7.37625e-13	1.00631e-11	0.0397625	0.162255	6.80033e-12	2.0866e-10	3.56451e-13	2.83967e-11
WBGene00016943	acdh-1	315.799	261.779	289.094	36.9895	25.8005	30.7719	233.874	227.12	241.269	123.252	132.702	117.957	26.0414	24.6454	28.4064	29.6327	26.3347	26.51	147.989	179.943	157.308	61.408	75.4908	73.9409	222.848	180.186	213.832	acdh-1	-3.21775	-0.302266	-1.21386	-3.45865	-3.40034	-0.842521	-2.04628	-0.49505	1.74525e-22	1.22217e-20	0.000516649	0.0128755	1.15887e-14	5.73391e-13	3.0436e-11	1.55996e-09
WBGene00016984	npr-8	1.22091	1.82559	1.56801	1.13025	1.32867	0.884456	1.22204	1.50016	1.91379	1.1227	0.86597	1.12127	0.896232	1.12379	1.0994	1.19181	1.00566	1.12962	1.13218	1.56565	1.91808	1.43741	1.33165	1.57111	1.25337	1.33114	1.53769	npr-8	-0.45961	0.00144013	-0.555903	-0.551746	-0.458345	-0.0211998	-0.0739708	-0.140122	0.0329267	0.0588977	0.99375	0.997429	0.0154071	0.0376073	0.909724	0.944927
WBGene00017012	acs-22	75.478	76.8396	76.8862	43.3685	46.8303	45.2719	76.4803	85.864	82.8443	18.5951	19.4827	16.479	19.6633	18.8494	18.936	15.2171	14.9448	13.5996	38.3153	39.106	39.4187	33.398	33.2662	34.7614	36.7801	35.645	35.8548	acs-22	-0.762102	0.0955128	-2.08297	-2.00021	-2.40064	-0.974324	-1.18053	-1.08346	1.078e-16	2.79011e-15	0.0229731	0.116229	2.76923e-25	1.23316e-22	3.90494e-19	9.04229e-17
WBGene00017022	D1022.3	1.18846	1.37016	1.71902	2.52916	2.39888	2.5241	1.43259	0.907391	1.38094	0.737968	1.18521	0.87529	1.59382	2.06656	1.79919	0.973983	0.75067	0.84371	1.10134	0.907391	1.09529	1.77533	2.55553	2.33494	1.35842	0.949999	1.24967	D1022.3	0.826084	-0.216892	-0.626329	0.368426	-0.739241	-0.442756	0.641858	-0.265403	4.33752e-05	0.000155415	0.276881	0.525131	0.00977134	0.0254688	0.0447559	0.103665
WBGene00017071	aagr-1	100.185	97.8945	97.5737	42.9157	39.6118	39.3854	89.4372	86.0848	95.0557	21.2934	23.3846	22.1411	21.0915	22.4014	21.9244	33.774	30.8862	29.99	40.1163	43.0944	41.7608	31.4945	30.4256	29.869	46.9708	47.3538	46.7215	aagr-1	-1.27756	-0.130471	-2.14846	-2.17808	-1.65112	-1.24566	-1.68789	-1.06834	8.33492e-23	6.26635e-21	0.00171438	0.0237241	9.68434e-27	7.31252e-24	1.50854e-22	8.09767e-20
WBGene00017083	kin-33	3.66831	3.36469	3.07979	1.30578	1.49591	1.24867	2.99257	2.75204	2.59266	2.14845	1.75873	1.82806	1.84394	1.53086	1.79919	2.46813	2.2821	3.02853	1.42502	1.64162	1.98548	1.43741	1.76428	1.6095	2.88791	2.85797	2.48357	kin-33	-1.32359	-0.276113	-0.823979	-0.97255	-0.377954	-1.02118	-1.07378	-0.297614	3.19718e-09	2.44713e-08	0.0225468	0.115202	1.6785e-06	1.39945e-05	7.45536e-08	1.6452e-06
WBGene00017102	E02H9.4	1.38094	1.18521	1.88356	1.17421	0.972641	0.833198	1.36511	1.74784	1.72157	0.777282	0.86597	0.439527	0.834263	1.01875	0.841534	0.814351	1.40164	0.876408	0.97068	1.25552	1.16429	1.15628	0.786693	1.11114	1.39319	1.52847	1.18521	E02H9.4	-0.557782	0.129208	-1.16097	-0.705453	-0.537104	-0.391491	-0.553955	-0.0984213	0.0189951	0.0364437	0.501008	0.719983	0.000235435	0.00102118	0.0776266	0.159317
WBGene00017103	klo-2	16.3815	15.9344	16.3908	10.987	11.6346	10.5046	17.2373	17.8383	17.644	11.0824	11.0899	11.5793	9.32114	10.0104	9.78522	11.6659	12.122	12.2747	12.7435	12.4575	14.484	11.5366	11.726	10.1546	15.5735	14.565	13.7271	klo-2	-0.556549	0.113301	-0.52697	-0.741556	-0.430723	-0.298665	-0.538489	-0.152596	9.15865e-10	7.63602e-09	0.0499123	0.187463	3.6601e-09	6.35015e-08	2.45981e-05	0.000200135
WBGene00017108	cyp-43A1	19.4759	22.0913	22.1516	23.3636	21.641	21.0701	19.0517	18.9477	21.5039	13.1673	12.3615	13.8725	18.2676	18.9418	18.484	16.6757	17.4877	16.9814	16.3211	17.3607	16.5849	18.6915	17.8524	18.2112	18.9597	18.5097	18.4207	cyp-43A1	0.059594	-0.0989844	-0.687447	-0.188767	-0.310966	-0.339256	-0.21372	-0.183876	0.283382	0.368082	0.0832487	0.257899	1.02199e-11	3.06014e-10	2.49675e-06	3.03861e-05
WBGene00017131	E04F6.15	8.14437	7.65407	8.41875	5.29918	5.0789	4.81452	8.76285	10.6336	8.53014	2.5805	2.20731	2.33839	2.65478	2.50403	2.41918	1.92819	2.18583	1.94486	4.40671	5.0448	4.14703	5.35478	6.79011	6.41577	5.31844	5.28979	6.09873	E04F6.15	-0.67048	0.201168	-1.76727	-1.67454	-1.99754	-0.84136	-0.393416	-0.540321	1.15152e-07	6.84409e-07	0.0187469	0.103212	2.08892e-13	8.26385e-12	3.2829e-09	1.05778e-07
WBGene00017151	EGAP9.3	2.16449	2.18328	1.71902	3.48944	3.96355	3.5658	2.24376	2.92311	2.92311	1.32637	1.28237	1.66143	4.13339	4.18672	3.92351	1.32867	1.25229	0.909788	2.24082	1.44304	2.02341	3.65193	3.74713	4.40374	1.91274	2.07901	2.65996	EGAP9.3	0.866482	0.409757	-0.501046	1.02587	-0.83269	-0.0866372	0.956625	0.124875	2.69398e-06	1.23303e-05	0.0123593	0.0783942	0.0130587	0.0326458	0.610827	0.730092
WBGene00017157	tyra-2	1.70849	1.00337	1.37149	2.17026	2.2947	2.40223	1.4	2.448	1.52738	0.918312	0.735531	0.814351	1.53086	1.53086	1.37969	1.00788	1.08335	0.628795	1.25092	0.867561	0.883744	2.6138	2.33053	1.78164	1.87428	1.21233	1.60826	tyra-2	0.755406	0.370805	-0.704873	0.13854	-0.624662	-0.423304	0.733076	0.189775	0.00103704	0.00275512	0.0929621	0.275038	0.0173524	0.0416452	0.104982	0.201551
WBGene00017168	F01F1.14	0.786693	0.67057	0.447775	0.210348	0.11646	0.12278	0.413184	0.404605	0.412165	0.171705	0.174276	0.377175	0.14382	0.204483	0.252514	0.27634	0.196961	0.479036	0.571235	0.324738	0.37194	0.204483	0.341222	0.140385	0.187715	0.44407	0.454863	F01F1.14	-2.01363	-0.580201	-1.39375	-1.62636	-1.00972	-0.552242	-1.44974	-0.86096	0.00051969	0.00147765	0.0893703	0.268714	0.00356989	0.0107879	0.111422	0.210767
WBGene00017176	nmur-3	1.04747	1.25609	1.08565	0.567005	0.594923	0.45035	0.876408	1.01645	0.826967	0.609498	0.594923	0.814351	0.376178	0.520555	0.59979	0.814351	0.567005	0.507819	0.729335	0.632269	0.590267	0.486198	0.557617	0.62757	0.795519	0.706068	0.729335	nmur-3	-1.0738	-0.310028	-0.745592	-1.21014	-0.898511	-0.788532	-1.03542	-0.598376	3.21939e-05	0.000118406	0.0809621	0.254216	0.000942089	0.0033679	0.000473209	0.00239389
WBGene00017183	scl-15	0.700701	0.519484	0.615502	0.623883	0.729335	0.481012	0.610753	0.571235	0.636929	0.412165	0.20813	0.377175	0.454863	0.26335	0.628795	0.62757	0.626464	0.507819	0.170646	0.211465	0.18888	0.377175	0.374786	0.0957236	0.222487	0.44407	0.347299	scl-15	-0.0166858	-0.0157861	-0.922517	-0.549892	-0.0749132	-1.68094	-1.28058	-0.902091	0.954452	0.96681	0.956341	0.98149	0.0192	0.0454286	0.000855739	0.00397051
WBGene00017197	F07C3.9	1.28464	1.11114	1.02375	1.36565	1.18946	1.1086	1.70041	1.74784	1.56565	0.573975	0.899233	0.629408	1.04747	1.19668	1.302	0.973983	1.04526	0.97925	2.24082	1.37257	1.41213	1.60137	1.24411	1.93829	2.05958	1.58681	2.42501	F07C3.9	0.105097	0.553948	-0.728329	0.044829	-0.185919	0.541862	0.443174	0.800937	0.620455	0.694293	0.00849814	0.0621186	0.00989696	0.0257499	0.0106006	0.0318568
WBGene00017201	grsp-4	17.0166	14.8923	14.7402	4.91971	4.8853	5.60074	15.4886	15.2377	15.3132	10.0014	10.549	10.1215	6.22261	5.2722	5.72086	10.0685	11.305	11.0778	14.4828	12.2075	15.4482	8.05886	8.82149	6.90261	14.2716	13.9696	12.9746	grsp-4	-1.59525	-0.0185346	-0.602161	-1.43481	-0.517311	-0.147922	-0.962781	-0.178418	2.78374e-15	5.64781e-14	0.799071	0.906962	4.91911e-08	6.52637e-07	0.0563574	0.124122
WBGene00017208	fbxb-35	0.945286	1.40723	1.05492	0.347299	0.287354	0.27634	1.11448	1.01645	1.04747	0.777282	0.698364	0.476665	0.699597	0.468998	0.458477	0.547709	0.782896	0.715287	0.757749	0.785398	0.549909	0.377175	0.591483	0.346131	1.22091	0.917178	0.973362	fbxb-35	-1.86077	-0.0667435	-0.814764	-1.05349	-0.697092	-0.682767	-1.35861	-0.108951	4.1863e-06	1.84013e-05	0.723864	0.863886	0.00177914	0.00588541	0.00473831	0.0164482
WBGene00017216	F07F6.2	1.35523	1.37016	1.37149	0.872637	0.537469	1.04747	0.94589	1.32981	0.934651	0.777282	1.14717	0.93904	0.671813	0.877423	0.925647	0.893399	1.15328	0.84371	0.819985	1.06164	1.01645	0.876408	0.786693	0.829635	1.18634	1.13913	1.18521	F07F6.2	-0.785124	-0.365921	-0.53551	-0.74574	-0.517157	-0.521494	-0.719688	-0.223417	0.000751902	0.00206283	0.0539185	0.19693	0.0113223	0.0288787	0.0111704	0.0332813
WBGene00017249	fbxb-108	0.816639	1.22091	1.1191	0.0778796	0.312325	0.210348	1.15263	0.814351	0.826967	0.702891	0.565771	0.629408	0.234285	0.174276	0.312325	0.893399	0.66043	0.715287	1.04014	0.746979	0.590267	0.342374	0.201717	0.346131	0.724271	0.741324	0.520555	fbxb-108	-2.66757	-0.158378	-0.717977	-2.18315	-0.477916	-0.401805	-1.88278	-0.656727	6.18078e-06	2.62577e-05	0.489155	0.71277	0.0132944	0.0331302	0.111245	0.210549
WBGene00017252	sdz-10	0.760427	0.744512	0.819985	0.423735	0.341222	0.210348	0.748237	0.842509	1.04747	0.377175	0.594923	0.506477	0.345064	0.386511	0.484815	0.736668	0.721714	0.84371	0.757749	0.67057	0.733426	0.525336	0.557617	0.513777	0.616643	0.513777	0.766279	sdz-10	-1.28405	0.158523	-0.671245	-0.952261	-0.00955496	-0.100207	-0.535988	-0.316164	8.80472e-05	0.000295025	0.409647	0.650598	0.00887871	0.0234057	0.624002	0.740693
WBGene00017257	F08F1.3	2.78963	3.05281	2.92311	1.9849	2.37727	2.21743	3.0259	2.18995	2.79854	1.1227	1.42184	1.00214	1.2291	1.47233	1.4949	1.73755	1.66024	1.81167	1.86441	2.44365	1.56565	1.56849	2.09289	1.97733	2.92311	3.37609	2.20615	F08F1.3	-0.425133	-0.142715	-1.33906	-1.07548	-0.752961	-0.612216	-0.655246	-0.0575209	0.0103322	0.0214564	0.32936	0.575684	6.20662e-07	5.87733e-06	0.000786633	0.00370531
WBGene00017308	F09F9.3	0.249852	0.23574	0.151511	0.236835	0.234285	0.0557608	0.0866407	0.119023	0.052684	0.0169575	0.084508	0.0162814	0.12278	0.341222	0.133009	0.0557608	0.100299	0.0648727	0.170646	0.28854	0.0888273	0.309995	0.234285	0.346131	0.12278	0.049777	0.176446	F09F9.3	-0.475243	-1.31988	-2.83665	-0.209913	-1.51667	-0.351278	0.482649	-1.02046	0.390128	0.479502	0.0489271	0.185043	0.00295788	0.00916507	0.512134	0.646759
WBGene00017336	ugt-41	64.4849	70.6536	66.221	47.4432	49.588	46.5246	72.0931	74.5066	81.1543	23.6609	22.7963	22.1411	17.2465	17.7395	18.3479	30.6701	31.9035	29.5093	43.926	43.0944	41.5248	27.2647	24.2276	29.9828	49.8947	49.7434	49.9524	ugt-41	-0.487522	0.176815	-1.55666	-1.91997	-1.13042	-0.646011	-1.3183	-0.427017	9.64726e-11	9.38621e-10	0.000590131	0.0138124	2.52469e-21	4.52023e-19	2.27962e-13	1.92186e-11
WBGene00017363	F10G2.2	0.671813	0.781823	0.545169	0.179976	0.204483	0.392683	0.913106	0.976111	0.484815	0.311275	0.240311	0.227103	0.345064	0.312969	0.374208	0.392683	0.476665	0.598681	0.44916	0.479036	0.44667	0.236835	0.201717	0.26335	0.439527	0.479036	0.386511	F10G2.2	-1.44338	0.22621	-1.35126	-0.935573	-0.419377	-0.518984	-1.49678	-0.594459	0.000288217	0.000868249	0.330737	0.577393	0.000606202	0.00229917	0.0654784	0.139649
WBGene00017364	clec-7	7.59652	9.14441	7.80678	0.541228	0.401299	0.366258	6.91877	8.20227	8.04414	2.24082	2.30401	2.92438	0.314909	0.26335	0.279805	1.19181	0.782896	0.97925	7.28506	7.0867	6.84428	0.377175	0.341222	0.26335	5.0078	4.64922	5.11435	clec-7	-4.22084	-0.0799389	-1.70718	-4.83017	-3.08084	-0.199588	-4.63266	-0.725002	1.80668e-13	2.68866e-12	0.323938	0.570976	8.98675e-14	3.74275e-12	0.0219719	0.0583375
WBGene00017374	ttr-41	60.6181	61.8216	61.2251	49.7575	48.5613	46.1632	61.2132	64.8395	61.7603	41.6277	45.5761	41.3787	43.2707	42.3912	50.2657	45.3402	46.4096	43.7598	53.8185	52.9548	57.7612	46.7851	46.3012	42.5755	50.8248	50.8531	51.6597	ttr-41	-0.345144	0.0324183	-0.516628	-0.440954	-0.439646	-0.159402	-0.434935	-0.260167	1.46534e-07	8.55704e-07	0.5019	0.720692	7.72737e-11	1.91443e-09	0.00288235	0.0108679
WBGene00017382	F11D5.5	1.53542	1.93159	1.64162	0.594923	0.312325	0.513777	1.66622	1.95476	1.72157	0.67057	0.801822	0.506477	0.204483	0.23574	0.341797	0.350966	0.782896	0.715287	1.15771	1.14768	0.698364	0.44916	0.374786	0.306282	0.684565	0.879465	0.876408	F11D5.5	-1.83993	0.0767855	-1.376	-2.70149	-1.46945	-0.774728	-2.13241	-1.05029	2.09034e-06	9.76675e-06	0.653296	0.822952	1.72027e-05	0.000105049	0.00104927	0.00470264
WBGene00017390	F12A10.1	1.32637	1.0391	1.22806	3.90176	3.62844	3.18349	1.26641	1.22271	1.08916	1.08663	0.698364	0.439527	1.68664	1.86496	1.18521	0.736668	0.782896	0.819985	1.22091	1.22091	0.698364	2.10436	2.55553	2.33494	1.00788	0.917178	0.973362	F12A10.1	1.56788	-0.00422754	-0.806805	0.382391	-0.60702	-0.232033	0.951642	-0.30954	5.74937e-09	4.22018e-08	0.984346	0.994388	0.00587845	0.0165009	0.316546	0.459768
WBGene00017402	F12E12.1	14.2326	13.3211	14.8069	12.5431	11.5246	12.0334	14.3711	9.85679	11.7142	10.4186	9.52824	9.50663	10.743	10.855	10.9754	11.4369	11.64	11.3451	10.2112	10.3388	10.4546	11.6395	12.8341	11.3883	12.9914	11.5087	11.7781	F12E12.1	-0.228863	-0.253323	-0.526397	-0.379098	-0.299288	-0.45036	-0.238179	-0.225782	0.00864075	0.0182921	0.00389794	0.038639	1.55865e-06	1.31315e-05	1.0973e-05	0.00010331
WBGene00017413	F13A2.4	4.66523	4.58088	5.37469	2.30624	2.32367	2.5241	4.89218	3.87359	2.63866	2.92438	3.15256	2.68013	2.26339	2.47857	2.20731	3.0765	3.06777	2.53442	2.92065	2.84632	3.30239	2.23024	2.33053	2.64564	3.44251	3.60163	2.94995	F13A2.4	-1.03186	-0.384517	-0.74413	-1.06916	-0.764868	-0.689169	-1.02966	-0.548731	3.11099e-07	1.70384e-06	0.00607411	0.0504523	2.14231e-05	0.000126035	3.82462e-05	0.000290942
WBGene00017427	acp-5	8.8266	9.73278	7.98107	11.0434	11.0631	12.0674	8.47188	8.06185	8.53014	4.37227	5.23661	4.94326	7.43755	7.15122	7.99425	4.92107	5.5691	5.6389	5.48749	5.45562	6.03366	9.74208	8.99812	9.84098	6.04454	7.15957	7.14485	acp-5	0.369042	-0.0767543	-0.863707	-0.230039	-0.707211	-0.640416	0.11016	-0.380791	2.62938e-05	9.88407e-05	0.330162	0.576738	6.08392e-10	1.24893e-08	5.54351e-08	1.28024e-06
WBGene00017436	F13H8.3	32.0854	33.1919	32.5013	4.65096	4.75181	5.43366	33.1979	32.1576	31.8457	23.9991	22.8947	22.1411	5.62122	5.02644	6.10352	22.7046	22.4537	22.318	28.61	28.1724	29.2175	8.61273	7.82971	8.36642	25.4353	26.2298	26.974	F13H8.3	-2.73394	-0.00748703	-0.504865	-2.55912	-0.53615	-0.184746	-1.9851	-0.314568	1.31989e-24	1.46939e-22	0.858459	0.935575	8.46361e-12	2.55187e-10	0.000181634	0.00106749
WBGene00017446	F14B8.4	5.00414	6.13971	5.11824	1.70091	0.917178	1.50016	5.30182	4.21114	4.12571	3.32997	3.80555	3.7027	1.34749	1.32867	1.27491	3.85381	3.85831	3.54658	3.70478	3.8261	4.0811	1.94926	1.73097	1.97733	4.02517	3.73262	4.10481	F14B8.4	-1.99787	-0.246962	-0.574025	-2.02721	-0.523427	-0.477035	-1.51761	-0.445229	9.05664e-12	1.03888e-10	0.0251321	0.122564	3.14615e-05	0.000176654	0.000189345	0.00110384
WBGene00017474	F14H12.7	1.01361	1.60309	1.46407	0.210348	0.371314	0.240311	1.29959	0.746402	0.636929	0.609498	0.698364	0.663592	0.314909	0.0866407	0.07642	0.736668	0.567005	0.567005	0.416662	0.479036	0.663592	0.204483	0.127199	0.0957236	0.543824	0.545169	0.662475	F14H12.7	-2.34781	-0.621938	-1.0173	-3.38814	-1.12013	-1.395	-3.29577	-1.19489	5.74904e-06	2.45678e-05	0.0133724	0.0825881	0.00103731	0.00366305	9.58143e-05	0.000629829
WBGene00017484	F15E6.3	1.6095	1.14883	2.11503	24.2515	25.5028	26.6458	1.80196	2.5805	2.175	0.814351	0.500479	0.439527	6.782	7.19391	7.26291	1.07869	1.15328	1.21588	0.902609	0.632269	0.980287	6.51143	5.61822	5.67804	3.11084	4.1134	3.33845	F15E6.3	3.99113	0.44371	-1.49806	2.14913	-0.457473	-0.926707	1.89693	1.13691	8.57245e-19	3.20167e-17	0.0227289	0.115648	5.75211e-05	0.000298199	0.00109363	0.00485754
WBGene00017485	F15E6.4	2.33623	1.70849	1.71902	0.786693	0.972641	0.684565	1.73574	1.98548	1.67381	0.412165	0.665602	0.346131	0.234285	0.23574	0.341797	0.392683	0.165854	0.240311	1.10134	1.18846	1.49143	0.525336	0.87529	0.62757	2.85265	2.39763	2.72942	F15E6.4	-1.25534	-0.0905196	-2.09692	-2.87383	-2.98663	-0.623939	-1.53794	0.471711	4.27714e-06	1.87478e-05	0.570365	0.768407	2.16928e-07	2.34436e-06	0.00184829	0.00748739
WBGene00017487	F15E6.6	21.8773	24.3692	22.2504	19.3255	19.3859	19.5426	21.6122	25.2127	26.0414	16.5088	16.295	15.5759	18.1363	18.2704	17.0166	21.7092	21.0859	23.4201	20.2967	21.3181	22.7463	22.5844	22.5208	24.2986	26.0189	27.7829	26.5579	F15E6.6	-0.230553	0.0858396	-0.500853	-0.354469	-0.0440973	-0.089961	0.0184162	0.234567	0.000874256	0.00235984	0.156277	0.37753	2.53845e-08	3.62842e-07	0.15024	0.265542
WBGene00017498	pud-4	71.0739	65.2005	66.3513	5.72209	5.15952	4.45454	91.6638	95.7655	101.324	3.08322	4.31596	3.73407	0.513777	0.548838	0.431352	5.7023	5.83652	5.58882	15.3862	11.479	14.3903	2.18928	2.59266	2.40223	30.2176	29.6552	32.0049	pud-4	-3.71083	0.507922	-4.18212	-7.03052	-3.55384	-2.29245	-4.79809	-1.14062	3.58497e-23	2.92301e-21	6.3929e-11	3.70085e-07	2.7778e-22	6.10658e-20	1.29085e-22	7.23167e-20
WBGene00017501	pud-3	502.964	511.641	508.943	30.2224	27.7143	28.3132	599.948	636.709	658.452	32.6717	43.1714	33.5254	2.3629	2.98751	2.38801	66.1189	64.6399	62.6735	128.983	108.419	123.369	10.5797	13.8787	11.4342	235.381	214.63	229.108	pud-3	-4.13946	0.313242	-3.81293	-7.61834	-2.97838	-2.07874	-5.41051	-1.16656	3.21018e-29	2.23005e-26	5.69346e-07	0.000205996	6.4257e-29	8.58424e-26	4.60907e-25	4.70857e-22
WBGene00017529	F16G10.15	0.945286	1.44534	1.81236	0.514968	0.537469	0.656635	1.36511	1.40056	1.76428	0.814351	0.665602	0.567005	0.542482	0.754237	0.841534	0.350966	0.476665	0.44407	1.25092	0.708856	0.951955	0.876408	0.753274	1.07104	0.902609	1.10134	0.766279	F16G10.15	-1.26048	0.154072	-1.00932	-0.948765	-1.67205	-0.482756	-0.612646	-0.552861	0.000147342	0.00047151	0.435059	0.671495	0.00089604	0.00322452	0.0435143	0.101533
WBGene00017573	F18E9.7	1.84833	1.07489	1.33114	0.100299	0.0866407	0.12278	1.01645	1.25609	1.04747	1.08663	0.698364	0.93904	0.345064	0.140385	0.252514	1.44653	1.18748	1.10134	0.87529	0.515529	0.812844	0.167091	0.269248	0.176446	0.902609	0.741324	0.909262	F18E9.7	-3.73734	-0.340318	-0.639485	-2.58705	-0.193424	-0.937377	-2.77102	-0.721637	9.51205e-07	4.76343e-06	0.0971589	0.282509	0.00795956	0.0213651	0.000577726	0.00285363
WBGene00017594	F19C7.4	3.98996	5.23077	4.81049	0.490807	0.481012	0.684565	6.11805	5.47748	5.48992	1.92682	2.43144	2.60208	0.513777	0.367495	0.341797	1.77937	2.08243	1.51189	3.56787	3.47056	3.33729	1.01875	0.908736	0.786693	4.39285	3.60163	4.20187	F19C7.4	-3.09727	0.300658	-0.999933	-3.52593	-1.38787	-0.417972	-2.3524	-0.192349	1.68476e-11	1.84252e-10	0.00523778	0.046058	5.48981e-08	7.16853e-07	0.00101047	0.00455695
WBGene00017595	F19C7.5	1.44118	1.25609	0.954048	0.94401	0.996025	0.807674	1.18634	1.12004	1.04747	0.883033	0.594923	0.629408	0.646365	0.62757	0.59979	1.32867	0.943338	1.35728	0.63562	0.94589	1.20431	0.631653	0.481012	0.786693	0.760427	0.778434	0.942246	F19C7.5	-0.401794	-0.10644	-0.816532	-0.956348	-0.0163921	-0.450966	-0.991539	-0.555829	0.0661643	0.1072	0.58754	0.780107	0.00218884	0.00704477	0.0424129	0.0995249
WBGene00017596	F19C7.6	0.641366	0.819985	1.15628	0.44667	0.341222	0.45035	0.94589	0.636929	0.75067	0.44407	0.534617	0.536143	0.405182	0.468998	0.374208	1.19181	1.18748	1.27082	0.729335	0.826354	0.698364	0.486198	0.51895	0.346131	0.934651	0.949999	0.698364	F19C7.6	-1.02635	-0.131468	-0.733322	-1.01072	0.530646	-0.171462	-0.895808	0.0210783	0.000624899	0.00174564	0.527146	0.736935	0.00668594	0.0184485	0.421645	0.565591
WBGene00017601	ets-7	0.609498	0.519484	0.884456	0.100299	0.204483	0.0557608	0.646365	0.537469	0.44916	0.513777	0.240311	0.315972	0.092211	0.140385	0.133009	0.511421	0.346131	0.270359	0.386511	0.404605	0.479036	0.236835	0.409693	0.221458	0.616643	0.573975	0.48903	ets-7	-2.65846	-0.277773	-0.959989	-2.46146	-0.891967	-0.64501	-1.22555	-0.235361	2.16219e-05	8.23664e-05	0.301948	0.549843	0.00659246	0.0182224	0.0364625	0.0878165
WBGene00017625	cgt-2	8.00026	7.90221	7.93834	4.34588	4.61939	4.15059	8.20459	9.42351	8.67396	5.11668	5.20167	5.52212	3.83687	3.62406	3.74347	6.41938	6.05509	6.1416	6.4395	6.66922	6.46006	4.37227	4.35207	4.3306	8.18622	9.12124	8.70605	cgt-2	-0.86422	0.139365	-0.588707	-1.09073	-0.360393	-0.286637	-0.86903	0.12456	2.68517e-12	3.32546e-11	0.0282986	0.131975	4.58238e-09	7.80218e-08	0.000144775	0.000885632
WBGene00017658	F21C10.9	15.3976	16.8504	15.7951	27.1975	28.5963	26.7118	17.5924	17.705	19.0953	8.51266	9.44798	9.8911	13.0893	12.5115	13.9442	6.96688	6.9469	7.69441	13.4024	15.0876	15.2902	11.6743	11.3268	12.9199	15.0805	13.0368	15.712	F21C10.9	0.783656	0.179499	-0.786123	-0.282288	-1.15113	-0.138673	-0.426399	-0.135863	4.92207e-13	6.83306e-12	0.0108111	0.072186	1.15263e-10	2.74591e-09	0.0549059	0.121745
WBGene00017660	F21C10.11	3.4029	3.51615	3.27637	7.4949	7.61032	6.52495	2.62767	2.06303	2.50531	2.96205	2.63932	1.82806	5.14253	4.84067	5.59012	2.12492	2.24855	2.20449	2.52667	2.33053	2.24376	4.37227	4.02572	4.48652	2.73936	2.0146	3.27372	F21C10.11	1.09024	-0.514447	-0.504887	0.60933	-0.6333	-0.521829	0.333802	-0.379131	8.29624e-10	6.97728e-09	0.00169363	0.0236224	0.0026351	0.00829504	0.00181507	0.00737895
WBGene00017667	ttr-37	2.02224	2.06303	2.2583	0.819985	1.10134	0.974606	2.24376	2.54975	1.76428	1.01645	1.21651	0.973362	0.436003	0.492108	0.751275	2.15933	2.13118	2.96761	1.10134	1.10134	0.951955	0.707884	0.557617	0.75067	2.92311	3.41441	3.79978	ttr-37	-1.15109	0.0438932	-0.993609	-1.96875	0.195084	-1.00682	-1.67302	0.668878	5.47546e-06	2.35144e-05	0.770576	0.890959	3.3574e-05	0.000186881	2.17701e-05	0.000180987
WBGene00017677	asp-11	0.482202	0.519484	0.545169	0.0162814	0.0176617	0.0169575	0.542482	0.87529	0.786693	0.140385	0.112896	0.258512	0.0432314	0.0162814	0.0162814	0.169382	0.165854	0.151511	0.355563	0.439527	0.298269	0.052684	0.052684	0.0180247	0.324738	0.412165	0.347299	asp-11	-4.92505	0.481269	-1.66324	-4.51413	-1.67146	-0.520667	-3.8054	-0.514298	6.52886e-08	4.03943e-07	0.0427019	0.169471	0.000177504	0.000794512	0.0694354	0.146434
WBGene00017688	ttr-35	18.0848	20.5903	17.4218	11.6508	11.7479	12.1458	19.825	17.2668	18.9523	10.1546	10.8512	10.7139	9.62375	9.4741	10.3616	9.02798	9.86628	9.01603	14.1319	15.0876	15.0713	12.0169	10.5453	11.0778	15.3452	16.1821	16.3573	ttr-35	-0.654151	0.00240681	-0.81756	-0.9274	-1.00288	-0.338046	-0.734679	-0.222645	1.04419e-10	1.00579e-09	0.967575	0.986579	2.17488e-12	7.24974e-11	8.53301e-06	8.44404e-05
WBGene00017691	ilys-5	501.973	502.964	505.822	148.362	147.868	142.187	529.828	492.824	488.311	59.3345	65.6523	63.5366	35.0251	32.2904	32.26	177.219	157.354	165.801	227.606	200.745	211.114	117.406	109.588	103.181	496.05	513.599	496.05	ilys-5	-1.78401	-0.000201251	-3.00187	-3.92175	-1.59702	-1.23989	-2.19275	-0.00487355	2.29257e-26	4.28119e-24	0.995954	0.998493	1.01764e-30	2.79926e-27	1.53868e-22	8.09767e-20
WBGene00017707	F22E5.8	0.84371	0.965141	0.920663	0.129589	0.142487	0.0899412	1.08077	0.842509	1.04747	0.643159	0.565771	0.409693	0.0432314	0.174276	0.133009	0.427577	0.507819	0.356884	0.786693	0.67057	0.951955	0.236835	0.234285	0.0957236	1.39319	1.04526	1.38307	F22E5.8	-2.93628	0.117247	-0.789226	-3.18861	-1.09633	-0.184592	-2.34185	0.476999	2.95744e-06	1.33859e-05	0.573632	0.770596	0.00606709	0.0169673	0.412897	0.557384
WBGene00017708	F22E5.9	12.8232	12.9527	13.8181	13.6475	12.1209	14.6056	13.2484	7.15122	7.99551	7.50478	8.53928	8.75403	9.86314	9.4741	8.35644	8.05705	8.88588	9.68628	8.88192	8.54368	8.67701	10.2881	9.61259	9.20173	9.97756	8.81387	8.63434	F22E5.9	0.0263277	-0.523333	-0.668808	-0.511467	-0.56206	-0.594384	-0.436311	-0.528387	0.81883	0.862013	0.000221273	0.00871393	2.16389e-05	0.00012715	6.71023e-05	0.000467455
WBGene00017713	F22E5.20	0.816639	1.0391	0.615502	0.594923	0.594923	0.45035	0.682401	0.571235	0.709999	0.412165	0.470739	0.476665	0.569914	0.520555	0.721714	0.851439	0.476665	0.567005	0.786693	0.907391	0.513777	0.742306	0.51895	0.26335	0.363901	0.479036	0.662475	F22E5.20	-0.557296	-0.30291	-0.82478	-0.431648	-0.416646	-0.164	-0.739212	-0.723767	0.0630644	0.102791	0.262279	0.508938	0.0150607	0.0368964	0.534988	0.666049
WBGene00017714	F22F1.2	3.70657	3.31485	4.24684	0.97068	0.699597	0.780507	3.21571	2.36996	2.79854	1.49699	1.35728	1.24103	1.0212	0.877423	0.948213	1.60723	1.12379	1.04633	2.02485	1.83858	1.44902	0.94589	0.786693	0.911899	2.12671	2.0146	2.23764	F22F1.2	-2.20297	-0.434728	-1.47022	-1.99024	-1.63084	-1.09028	-2.10296	-0.821095	1.00338e-10	9.71874e-10	0.00121765	0.0199877	2.75125e-09	4.90564e-08	5.05395e-08	1.18291e-06
WBGene00017718	F22F4.5	4.13339	4.71921	4.14176	2.60703	2.32367	1.95476	4.07742	3.87359	3.77477	2.5805	3.21749	3.10027	2.13118	2.02485	1.63369	2.51129	2.49546	2.92311	4.21355	3.57428	4.0811	2.18928	2.73422	2.40223	4.2065	4.15865	3.9396	F22F4.5	-0.900343	-0.139068	-0.5372	-1.15113	-0.69524	-0.119512	-0.814123	-0.0713955	4.93447e-08	3.10834e-07	0.175168	0.403359	5.33771e-05	0.000279892	0.247134	0.384961
WBGene00017719	ldp-1	256.629	274.096	271.747	157.818	149.616	164.449	252.467	211.28	200.926	174.761	188.972	181.726	132.899	134.817	129.814	142.982	141.636	143.842	196.916	201.685	197.741	134.782	137.236	118.322	177.342	184.391	173.338	ldp-1	-0.765373	-0.275759	-0.556082	-1.01145	-0.903511	-0.427186	-1.03777	-0.583414	3.81533e-14	6.40622e-13	1.61894e-05	0.00232365	5.95691e-11	1.51248e-09	1.17224e-08	3.26778e-07
WBGene00017724	F22F7.7	6.39336	6.67813	6.50173	2.5805	2.42501	2.32064	6.76602	6.53348	6.0193	3.94453	3.91765	4.79918	2.87052	2.43144	2.60208	4.75435	5.15805	4.60991	5.23661	5.59615	5.15673	3.1658	2.51926	2.09289	6.20662	6.13192	5.91479	F22F7.7	-1.40428	-0.0157862	-0.622073	-1.30281	-0.428436	-0.291292	-1.32415	-0.0987124	1.04393e-12	1.38823e-11	0.846607	0.930041	3.67975e-07	3.74817e-06	0.00208575	0.00828905
WBGene00017727	F22H10.3	43.2266	44.2098	45.4259	49.451	50.0508	44.1312	43.6245	26.298	27.3553	26.1442	29.6762	28.4633	40.4128	42.078	39.2504	46.6281	45.9023	49.6539	28.9379	26.9781	30.1288	29.1788	27.4571	24.8782	39.9232	38.8753	39.7549	F22H10.3	0.112454	-0.482254	-0.654712	-0.12449	0.0995593	-0.623812	-0.698881	-0.163503	0.2403	0.321591	4.28304e-05	0.00416252	9.14719e-07	8.27392e-06	1.53169e-06	2.05254e-05
WBGene00017730	F22H10.6	26.3145	25.7328	29.7522	1.13025	0.872637	1.04747	26.2002	19.5948	17.4662	5.2935	4.07501	4.88074	0.754237	0.754237	0.721714	2.65996	3.21813	3.50405	11.5431	10.5238	10.5703	0.876408	1.13279	1.07104	14.4231	12.5758	12.1147	F22H10.6	-4.69181	-0.381366	-2.50854	-5.13332	-3.09203	-1.31383	-4.6848	-1.06097	5.22121e-14	8.48239e-13	0.000130505	0.00673113	7.27097e-16	4.4307e-14	5.4441e-13	4.14683e-11
WBGene00017733	ubxn-1	103.724	108.167	121.242	119.457	118.783	126.559	115.937	78.9895	74.1111	75.5358	72.8242	75.4652	83.2819	78.875	77.1554	76.3518	78.028	80.7598	77.2684	73.3241	74.7994	82.774	83.0226	68.9797	85.0996	84.0558	74.3863	ubxn-1	0.133536	-0.329402	-0.568811	-0.473019	-0.496892	-0.558225	-0.499835	-0.449676	0.148003	0.213947	0.00131213	0.0206599	2.0603e-06	1.68224e-05	2.42373e-06	2.97057e-05
WBGene00017748	F23F1.7	4.91113	4.84695	5.30944	8.84168	8.48257	7.99425	5.28188	3.8173	4.67078	3.79681	3.67767	3.10027	7.62266	8.31756	7.41475	3.44028	4.19545	4.36235	3.96059	3.57428	4.43837	7.78712	7.47345	7.66221	4.32071	4.80269	4.45767	F23F1.7	0.749317	-0.141914	-0.519187	0.631685	-0.319694	-0.331929	0.604716	-0.149073	1.00724e-08	7.11664e-08	0.182602	0.413245	0.000115156	0.000546425	0.00515385	0.0176125
WBGene00017756	F23F12.12	14.8312	14.5395	13.1912	51.4252	53.4209	50.4701	12.9089	15.9948	16.3508	7.3865	6.79011	6.59015	53.6567	54.0374	62.5576	10.3892	11.0784	10.621	12.88	10.9521	12.5814	49.0771	45.6411	61.7603	13.5025	15.9425	14.2888	F23F12.12	1.87244	0.0784374	-1.04317	1.9998	-0.406994	-0.223467	1.86219	0.0381694	1.07381e-17	3.3541e-16	0.473396	0.702389	2.9222e-08	4.09934e-07	0.0601554	0.130655
WBGene00017771	F25B4.8	6.29368	6.03071	7.47345	3.59791	2.95181	3.43712	6.76602	5.65602	6.63491	4.2065	4.28108	4.24262	2.94649	3.01633	2.65478	4.80033	4.91238	5.01256	6.52495	5.59615	5.67919	4.21958	3.67156	4.17009	6.72762	7.20779	6.16064	F25B4.8	-0.977063	-0.0559458	-0.628751	-1.1883	-0.417808	-0.14433	-0.711936	0.0252514	9.15672e-10	7.63602e-09	0.526822	0.736687	1.022e-06	9.11147e-06	0.119455	0.222428
WBGene00017791	try-8	2.71785	1.49143	2.49546	0.567005	0.671813	0.884456	1.63369	1.88892	2.28615	1.82317	1.32375	1.40626	1.4621	0.853299	1.0047	2.69708	1.91524	2.42391	1.39319	1.18846	1.20431	0.707884	1.04124	0.872637	1.94998	1.37149	1.46724	try-8	-1.67609	-0.201655	-0.549665	-1.02545	0.0739736	-0.793896	-1.34762	-0.475804	6.99022e-06	2.93802e-05	0.302229	0.549843	0.0170172	0.0409786	0.00166072	0.006884
WBGene00017840	ttm-2	6.58859	7.00368	6.83814	6.03366	5.9102	6.70943	7.85445	7.72101	7.51919	4.50968	3.8547	4.41102	6.782	5.78283	6.91877	5.54379	5.45499	6.59846	7.35905	7.01127	6.92409	8.4021	7.28506	8.9124	7.20659	6.64226	7.07857	ttm-2	-0.133659	0.17977	-0.677431	-0.0744322	-0.211241	0.0634066	0.258069	0.0352796	0.131528	0.19358	0.0353693	0.150964	1.77669e-07	1.98047e-06	0.454241	0.5963
WBGene00017881	asp-13	172.333	169.623	168.739	9.61813	9.03041	8.88353	161.913	148.362	154.915	35.4241	40.6591	36.5785	6.782	6.05954	6.77545	20.7811	20.8658	22.1376	84.3265	89.6932	87.8491	10.8712	10.7855	10.7448	99.3361	93.0304	101.449	asp-13	-4.2109	-0.135625	-2.1838	-4.70598	-2.99933	-0.965371	-3.97777	-0.799006	3.50576e-30	3.58145e-27	0.000764284	0.0154881	2.24492e-28	2.59917e-25	7.70515e-21	2.26806e-18
WBGene00017913	F29A7.3	0.112896	0.23574	0.12278	0.129589	0.11646	0.210348	0.12126	0.119023	0.0899412	0.0169575	0.084508	0.0450267	0.28854	0.115381	0.192078	0.169382	0.0682193	0.0648727	0.0728896	0.0957236	0.18888	0.167091	0.269248	0.176446	0.222487	0.209236	0.115381	F29A7.3	-0.00550054	-0.425126	-1.89672	0.338819	-0.746321	-0.441633	0.456005	0.266181	0.990927	0.993674	0.409981	0.650598	0.0117132	0.029701	0.397726	0.542601
WBGene00017925	F29B9.11	211.787	201.083	216.801	167.707	169.888	170.661	207.688	120.898	118.382	119.917	132.401	125.104	105.782	109.028	108.494	127.408	129.432	136.806	127.673	121.704	131.233	104.586	102.567	85.1815	139.155	133.909	107.779	F29B9.11	-0.308704	-0.541175	-0.738414	-0.960516	-0.675846	-0.725239	-1.10592	-0.732399	0.0107931	0.0222987	5.68125e-05	0.00468069	8.0702e-07	7.39995e-06	9.74301e-07	1.41123e-05
WBGene00017927	F29C4.4	0.641366	0.519484	0.479036	0.669264	0.729335	0.481012	0.314909	0.636929	0.525336	0.240311	0.341222	0.227103	0.728255	0.729335	0.814351	0.350966	0.626464	0.567005	0.26335	0.252514	0.298269	1.01875	0.833198	0.911899	0.402362	0.209236	0.386511	F29C4.4	0.185523	-0.210658	-1.03774	0.466537	-0.092197	-1.00056	0.749831	-0.772214	0.475529	0.563787	0.44597	0.679878	0.00583596	0.0164108	0.00616144	0.0204093
WBGene00017947	mth-2	7.24137	7.56017	7.60544	5.45562	5.69333	5.19239	7.56484	7.75703	6.92143	4.0558	4.85122	4.43837	5.40507	6.38972	6.13971	5.00525	5.34847	6.59846	5.98725	5.96871	6.20893	6.21822	6.41457	6.71918	7.62266	7.62266	7.65997	mth-2	-0.452985	-0.00765984	-0.746793	-0.322477	-0.396212	-0.300497	-0.21208	0.0331416	1.03147e-05	4.18833e-05	0.92167	0.966999	8.43856e-09	1.34947e-07	0.00104203	0.00467499
WBGene00017948	mth-1	17.9452	20.3783	17.2922	14.3128	13.0735	14.6751	17.7493	19.8137	22.1565	8.046	8.26541	9.15837	17.3375	17.6104	17.1747	16.0909	17.1705	16.0932	14.81	14.5251	15.2902	17.6313	18.9569	19.5828	21.2923	20.8289	19.3651	mth-1	-0.397573	0.0991491	-1.1202	-0.0868038	-0.166085	-0.311525	0.0164049	0.150845	6.29988e-06	2.67114e-05	0.145402	0.36144	1.65547e-13	6.67068e-12	0.000144291	0.000884043
WBGene00017962	fbxa-72	16.3112	17.2411	16.2116	10.2112	10.6383	9.45358	18.5951	18.1313	18.5027	9.68628	8.03086	8.563	7.79761	9.19686	8.41477	8.53368	8.39298	7.80552	14.0527	14.2997	13.1246	11.6743	12.5666	13.5303	16.4114	13.9104	17.2411	fbxa-72	-0.71672	0.152079	-0.927733	-0.972864	-1.01502	-0.262835	-0.405301	-0.0713912	4.24189e-10	3.75288e-09	0.0293306	0.135115	5.89801e-12	1.81937e-10	0.000908632	0.00417577
WBGene00017964	F31F7.1	50.3808	44.9453	48.0176	29.9828	28.4288	26.4825	53.1173	58.3332	51.2526	25.7399	27.7599	25.9372	21.4959	22.8248	22.9385	19.5207	21.4521	18.1097	40.8018	42.6182	42.447	20.2002	19.4294	19.5474	38.7026	38.6632	35.9652	F31F7.1	-0.754328	0.181596	-0.852861	-1.09237	-1.28341	-0.189272	-1.27526	-0.339475	1.24067e-13	1.89006e-12	0.00120932	0.0199073	1.30845e-14	6.32977e-13	0.00123553	0.00537378
WBGene00018025	F35A5.2	4.34704	3.93589	4.18344	4.12633	4.67935	4.15059	3.9042	3.19142	2.92311	2.43843	2.33558	2.7406	2.99744	2.91936	2.65478	3.0765	2.75677	2.59059	3.01479	3.2457	3.23293	2.85849	3.8066	2.64564	2.77192	2.73207	2.92188	F35A5.2	0.0488667	-0.320241	-0.726732	-0.539036	-0.578372	-0.397177	-0.425116	-0.566284	0.63507	0.707405	0.0060842	0.0504846	2.59131e-06	2.04004e-05	0.00131996	0.00568967
WBGene00018035	sek-4	4.81452	5.04432	5.0789	4.84986	4.55917	4.15059	4.50094	4.67685	5.48992	3.29092	3.59018	3.06677	4.01807	4.11932	3.42044	2.87636	3.14301	3.33729	3.47978	3.21424	3.23293	4.42398	4.28596	4.09358	3.90121	3.14359	3.01688	sek-4	-0.134882	-0.035185	-0.588996	-0.366725	-0.664464	-0.582548	-0.216272	-0.575212	0.165157	0.234687	0.704667	0.853722	6.46051e-06	4.5042e-05	5.70963e-06	6.06107e-05
WBGene00018036	F35C8.5	33.9347	35.0473	35.917	17.2852	17.955	18.4339	32.0314	29.1437	26.9273	20.7043	20.001	20.571	10.3511	10.3201	10.3176	17.8018	17.2957	17.0506	25.5578	26.7455	26.4054	13.6475	14.7857	14.6931	20.6862	19.395	21.0615	F35C8.5	-0.969005	-0.251683	-0.775254	-1.75981	-1.01042	-0.415515	-1.28505	-0.779906	2.79089e-17	8.07823e-16	8.05039e-06	0.00145637	5.11223e-15	2.67422e-13	1.78919e-09	6.16525e-08
WBGene00018049	clec-138	0.700701	0.819985	0.722322	0.129589	0.052684	0.0169575	0.511421	0.507819	0.97068	0.44407	0.407267	0.409693	0.405182	0.26335	0.279805	0.312325	0.721714	0.743452	0.292279	0.365129	0.37194	0.125671	0.234285	0.221458	0.324738	0.412165	0.454863	clec-138	-3.83572	-0.25485	-0.815924	-1.24707	-0.370626	-1.12272	-1.97962	-0.911097	3.74555e-05	0.000135944	0.355668	0.599349	0.0197331	0.0465	0.0035329	0.0129116
WBGene00018055	F35F10.5	2.1354	2.15096	1.81236	2.40223	2.26852	2.21743	2.31434	1.92243	1.94926	1.55997	1.00081	0.973362	1.34749	1.04579	1.03084	1.15628	0.567005	0.772963	1.39319	2.13485	1.88287	1.29897	1.95375	1.53418	1.63246	1.24103	1.07803	F35F10.5	0.183302	0.0222742	-0.839478	-0.846542	-1.39504	-0.213463	-0.369206	-0.648374	0.280594	0.365133	0.896284	0.953641	0.000578625	0.00220518	0.243213	0.380496
WBGene00018099	ztf-28	4.63239	4.96778	4.50254	4.65096	5.0789	5.69527	4.11461	2.448	2.92311	3.8272	2.94346	3.10027	3.59914	3.30581	3.74347	4.28691	3.55843	2.88906	3.1551	3.13042	3.47115	3.71159	3.74713	3.06777	3.62713	2.67443	2.0687	ztf-28	0.120761	-0.603835	-0.528466	-0.409494	-0.433695	-0.534456	-0.418691	-0.789348	0.393112	0.482332	0.000703498	0.0150324	0.00281542	0.00877047	0.00221801	0.00873164
WBGene00018103	F36H5.4	1.84833	1.37016	1.37149	0.490807	0.341222	0.513777	0.94589	1.53356	1.23253	1.08663	1.0391	1.02855	0.754237	0.877423	0.628795	1.37082	1.36952	1.21588	0.786693	1.60137	0.951955	0.778434	0.685773	0.547709	1.73471	1.37149	1.43306	F36H5.4	-1.78327	-0.330655	-0.538583	-1.02221	-0.218126	-0.55178	-1.18571	-0.0190065	4.26194e-06	1.87054e-05	0.0982726	0.284822	0.0168794	0.0407259	0.0124875	0.0365224
WBGene00018104	fbxb-53	0.816639	0.633246	1.05492	0.471284	0.671813	0.308848	0.842509	0.976111	0.636929	0.513777	0.374786	0.409693	0.569914	0.341222	0.431352	0.893399	0.594923	0.628795	0.44916	0.67057	0.812844	0.559924	0.623883	0.513777	0.795519	0.917178	0.807674	fbxb-53	-0.837176	-0.0160387	-0.946978	-0.916155	-0.269988	-0.418777	-0.539345	0.0302952	0.00734666	0.0158851	0.94561	0.977513	0.00451934	0.0132356	0.114634	0.215573
WBGene00018109	fbxb-12	0.404605	0.59979	0.652248	0.129589	0.11646	0.210348	0.248825	0.373631	0.412165	0.108754	0.174276	0.19592	0.204483	0.367495	0.222487	0.27634	0.133009	0.240311	0.204483	0.211465	0.37194	0.236835	0.201717	0.306282	0.439527	0.343787	0.559924	fbxb-12	-1.90548	-0.689443	-1.81117	-1.07575	-1.41083	-1.11101	-1.17029	-0.298188	0.000144049	0.000461738	0.0327528	0.144397	0.000271236	0.00115144	0.0035867	0.0130752
WBGene00018138	folt-2	205.603	226.855	218.745	28.6403	22.8331	25.8869	179.823	174.187	178.721	85.5959	97.421	89.1012	15.6859	14.9106	14.2888	27.6959	26.5008	27.164	177.219	176.416	167.131	41.7762	46.638	46.461	183.108	165.441	176.096	folt-2	-3.07123	-0.287693	-1.25898	-3.85549	-2.99929	-0.320469	-2.27233	-0.311016	6.29101e-28	2.42791e-25	9.15075e-07	0.000299851	8.39623e-21	1.37563e-18	1.57711e-07	3.12667e-06
WBGene00018145	F37C4.5	301.743	316.381	318.382	1159.64	1192.57	1253.38	341.501	233.641	235.381	161.195	172.201	175.679	757.455	767.504	728.815	211.114	213.832	223.254	222.382	212.195	208.749	728.815	737.463	691.462	256.128	250.631	232.278	F37C4.5	1.94345	-0.22869	-0.878181	1.26745	-0.528987	-0.5402	1.20519	-0.341528	7.13982e-22	4.55872e-20	0.00634911	0.051845	1.78168e-11	5.03949e-10	2.10337e-07	4.00288e-06
WBGene00018146	F37C4.6	29.2996	28.9379	29.6845	9.24389	10.1134	8.79078	24.3184	22.2693	21.9672	14.9299	15.7642	16.6276	6.35975	7.08797	6.41577	10.9552	10.4558	10.621	24.4537	23.5544	22.2063	9.64002	10.0824	9.15661	17.7229	16.2858	18.3182	F37C4.6	-1.64365	-0.358636	-0.891341	-2.14244	-1.45648	-0.32348	-1.60058	-0.750583	1.3849e-20	6.95131e-19	9.50336e-08	5.15765e-05	2.01911e-15	1.16498e-13	6.60769e-07	1.02644e-05
WBGene00018159	F37F2.2	28.2113	25.6459	28.4988	24.746	23.6324	23.1633	29.5808	18.2112	18.9	17.641	17.4923	17.0743	14.1885	15.7385	14.4268	19.0199	18.3339	18.4007	17.8024	16.031	16.8051	14.4999	17.6567	17.2536	18.7925	19.395	19.3214	F37F2.2	-0.201438	-0.335254	-0.657222	-0.891471	-0.563617	-0.698228	-0.743439	-0.517612	0.046074	0.078494	0.00184878	0.0247758	9.75587e-07	8.75156e-06	3.13169e-07	5.52162e-06
WBGene00018188	F38E9.6	1.50349	2.65996	1.74784	1.01645	0.972641	0.833198	1.96439	1.22271	1.72157	1.32637	1.07622	1.18395	0.807674	0.807674	1.0047	1.73755	1.56669	1.60137	1.28401	1.10134	1.16429	1.08916	1.302	0.911899	1.98215	1.21233	1.53769	F38E9.6	-1.00903	-0.238905	-0.669213	-1.13267	-0.216194	-0.673837	-0.782637	-0.292635	0.000170604	0.000538606	0.206283	0.44245	0.00420663	0.0124351	0.00342787	0.0125887
WBGene00018195	btb-16	3.75996	3.82485	3.30239	7.8834	8.39913	8.15983	3.87426	3.33316	3.85831	1.82317	2.30401	2.40449	5.17294	5.41918	5.72086	1.44653	0.913106	1.48195	2.72702	3.50524	3.23293	6.27343	6.04295	6.3679	2.8116	2.52533	3.05154	btb-16	1.17213	0.0211885	-0.743688	0.586266	-1.55003	-0.218988	0.782559	-0.381214	3.11653e-12	3.81967e-11	0.851141	0.932368	9.34007e-06	6.16061e-05	0.074638	0.154719
WBGene00018200	btb-17	4.66523	5.1219	4.58318	1.86496	1.77363	1.65355	4.04217	3.56787	3.80784	1.29495	1.52494	1.49883	0.896232	1.12379	1.12626	0.814351	0.721714	0.689154	3.27504	2.29653	2.78963	1.01875	1.53418	1.6095	2.8116	2.82008	3.30517	btb-17	-1.43417	-0.329287	-1.73134	-2.19741	-2.70115	-0.777213	-1.82542	-0.686824	7.05963e-11	7.03008e-10	0.00318471	0.0338694	2.26607e-11	6.21721e-10	2.85957e-07	5.14634e-06
WBGene00018202	F39F10.2	1.25092	1.22091	1.33114	0.44667	0.648205	0.599235	1.43259	1.29495	1.19437	1.01645	0.771209	0.753274	0.623883	0.414279	0.571235	0.851439	0.626464	0.84371	0.819985	1.14768	0.980287	0.742306	0.623883	0.467086	1.22091	1.24103	1.21588	F39F10.2	-1.21086	0.0450237	-0.607342	-1.27748	-0.736117	-0.39931	-1.06805	-0.0483187	7.539e-06	3.15265e-05	0.775484	0.892913	0.00319749	0.00979205	0.029312	0.0736809
WBGene00018204	F39F10.4	1.53542	1.18521	1.33114	0.423735	0.567005	0.539892	1.4	1.18846	1.08916	1.15628	0.833198	0.842509	0.671813	0.548838	0.571235	1.04526	1.25229	1.30085	0.729335	0.557617	0.883744	0.559924	0.623883	0.589117	1.18634	1.01361	0.807674	F39F10.4	-1.41598	-0.14032	-0.534814	-1.17179	-0.161633	-0.908598	-1.17985	-0.441786	2.44176e-06	1.12962e-05	0.395917	0.638251	0.0075086	0.0203446	0.000125998	0.000787124
WBGene00018222	F40A3.7	2.02224	2.39888	1.81236	0.765711	0.648205	0.884456	2.24376	2.48479	1.98982	0.609498	1.49143	1.12127	0.623883	0.853299	0.781823	1.04526	0.913106	1.15628	1.36123	1.44304	1.56565	0.559924	0.654265	0.911899	2.12671	1.87337	1.77937	F40A3.7	-1.43985	0.122975	-1.02672	-1.46566	-0.991711	-0.504931	-1.59578	-0.0977473	2.00487e-06	9.39518e-06	0.434594	0.671255	5.44452e-05	0.000284547	0.00894859	0.0277518
WBGene00018241	F40G9.5	5.45026	4.29126	4.67586	6.10952	5.94721	5.89054	4.21718	3.87359	3.80784	2.04643	1.52494	1.85854	4.04872	3.71284	5.03678	1.44653	1.79	1.69306	2.638	2.48579	2.6424	4.72125	5.14691	4.93868	2.65478	2.85797	2.86149	F40G9.5	0.317074	-0.274908	-1.40996	-0.190275	-1.53499	-0.886436	0.0392282	-0.781299	0.00184628	0.00462956	0.0105907	0.0713111	1.47099e-10	3.43369e-09	3.76807e-08	9.13967e-07
WBGene00018258	F41B4.2	7.94057	7.32338	7.73924	6.00548	6.74728	6.84172	7.18806	6.23514	6.73427	4.76309	5.08114	5.26442	5.37137	5.55842	6.10352	5.7023	5.5691	5.33104	5.66404	6.90375	6.07133	6.57899	5.74391	5.87839	6.48269	6.10235	6.35975	F41B4.2	-0.241696	-0.195125	-0.609387	-0.441259	-0.477673	-0.318403	-0.342102	-0.283113	0.00412331	0.00952507	0.0158395	0.0926372	8.81462e-08	1.08186e-06	0.000367704	0.00193103
WBGene00018268	F41C3.2	6.06226	5.23077	5.47497	16.7034	17.9186	16.6253	5.13261	5.02507	5.45026	2.36751	2.98751	2.95636	6.93721	6.97324	5.66272	3.39893	3.3636	3.63755	4.31827	3.74834	3.47115	6.24223	5.77251	5.59255	3.29741	4.60762	3.51615	F41C3.2	1.60185	-0.106632	-1.00843	0.219791	-0.682292	-0.53481	0.0727822	-0.564144	8.17839e-17	2.18851e-15	0.308238	0.555942	2.64556e-08	3.75721e-07	6.39092e-05	0.000447906
WBGene00018280	F41C6.7	3.07979	3.18438	3.21039	3.48944	3.45335	3.5658	3.49318	3.19142	2.89143	0.883033	0.899233	0.781823	2.52916	2.8116	2.85849	0.893399	0.626464	0.567005	1.64279	1.14768	1.80885	4.13193	4.61939	4.84514	1.91274	1.27082	1.85052	F41C6.7	0.150243	0.0167434	-1.90452	-0.211966	-2.25313	-1.06071	0.514571	-0.943384	0.208943	0.286086	0.888429	0.950106	1.64372e-09	3.06952e-08	2.6409e-07	4.8287e-06
WBGene00018343	F42A10.7	67.6484	65.4046	69.504	47.3883	48.3346	44.9729	99.8831	76.9164	79.9842	8.12013	9.44798	9.2503	36.6165	29.5093	33.4221	30.4256	30.7825	29.8576	40.2187	29.6384	32.8774	46.0701	42.3832	44.5268	68.6809	53.1173	66.5935	F42A10.7	-0.525135	0.333593	-2.91143	-1.03015	-1.15216	-0.980798	-0.607156	-0.115016	4.04672e-06	1.78374e-05	0.000493679	0.0125714	4.58761e-17	3.65473e-15	1.01753e-10	4.65039e-09
WBGene00018363	F42G9.4	0.84371	0.781823	0.819985	0.819985	0.699597	0.62757	0.748237	0.842509	0.567005	0.44407	0.500479	0.629408	0.454863	0.548838	0.404605	0.664084	0.377175	0.44407	0.63562	0.67057	0.479036	0.377175	0.753274	0.708856	0.439527	0.545169	0.559924	F42G9.4	-0.185748	-0.189097	-0.638909	-0.799276	-0.787355	-0.46809	-0.488545	-0.671146	0.408565	0.497933	0.394234	0.63678	0.0184415	0.0439031	0.058824	0.128357
WBGene00018375	F43C9.1	3.33144	3.36469	3.07979	0.160002	0.234285	0.12278	3.21571	4.34588	3.0522	1.26689	1.21651	1.77533	0.14382	0.0557608	0.07642	0.973983	0.879465	0.84371	2.17995	2.29653	1.56565	0.167091	0.234285	0.26335	2.85265	2.76305	2.55492	F43C9.1	-4.2685	0.108195	-1.20013	-5.22906	-1.86079	-0.708736	-3.89258	-0.257283	6.45905e-09	4.70378e-08	0.387735	0.631155	3.00488e-07	3.13428e-06	5.67444e-05	0.000406384
WBGene00018406	F44A2.7	0.249852	0.23574	0.12278	0.0778796	0.11646	0.0557608	0.178866	0.439527	0.201717	0.0169575	0.049777	0.0450267	0.0432314	0.0293713	0.07642	0.0176617	0.165854	0.123353	0.100926	0.0590172	0.052684	0.0899412	0.0169575	0.0180247	0.253557	0.115381	0.347299	F44A2.7	-1.25667	0.380586	-2.47528	-2.05222	-1.32368	-1.46183	-2.63139	0.149174	0.0726735	0.116356	0.450016	0.683167	0.00970283	0.0253131	0.04938	0.112227
WBGene00018425	F44E7.3	6.3679	7.32338	6.19556	6.32596	5.12014	5.5691	6.35816	3.612	4.08697	3.44091	3.06777	3.16512	2.99744	2.91936	3.45145	2.94649	3.91212	3.47056	3.1551	3.13042	3.27504	3.20558	3.29092	4.58866	3.47774	3.18438	3.86444	F44E7.3	-0.215535	-0.531945	-1.03578	-1.08772	-0.936514	-1.0503	-0.874939	-0.917385	0.103219	0.157564	0.000477527	0.0123861	4.78526e-07	4.68464e-06	2.74117e-07	4.9745e-06
WBGene00018433	ceh-82	2.19904	2.39888	2.35979	1.30578	1.30022	1.4085	2.77467	2.12492	2.21228	1.59382	1.32375	1.49883	1.17923	1.27895	1.27491	1.56801	2.31434	1.81167	1.86441	2.05656	1.74662	1.29897	1.27358	1.15016	2.46934	2.22565	2.11431	ceh-82	-0.788785	0.028722	-0.651562	-0.892112	-0.290125	-0.296825	-0.888551	-0.0296549	9.6581e-06	3.94664e-05	0.811058	0.912165	0.000106491	0.000509203	0.0288967	0.0729008
WBGene00018435	btb-9	5.64142	5.7196	5.90764	3.1689	2.70778	3.12229	5.88442	5.94477	6.29554	3.90711	3.21749	3.46362	2.38801	2.83802	2.48025	2.23266	2.72942	2.42391	5.0893	5.45562	5.48622	2.97331	3.15806	3.31485	5.53559	4.80269	5.75429	btb-9	-0.939794	0.0679113	-0.711159	-1.16564	-1.22366	-0.110651	-0.875895	-0.107273	3.06154e-10	2.76494e-09	0.396322	0.638667	3.94336e-08	5.33782e-07	0.18863	0.314178
WBGene00018437	btb-8	2.91505	2.87382	2.76616	0.872637	1.07869	0.915166	3.47174	2.92311	3.20933	1.89124	1.45671	1.66143	0.973362	0.909788	1.27491	2.94649	2.4286	2.31999	1.83169	1.60137	1.70904	1.08916	1.27358	1.45425	2.26581	2.39763	2.17676	btb-8	-1.60656	0.163765	-0.788818	-1.47735	-0.17757	-0.737818	-1.20016	-0.325321	4.11693e-10	3.65162e-09	0.131448	0.340607	2.79363e-06	2.17956e-05	4.56228e-06	5.03068e-05
WBGene00018452	F45D11.5	1.18846	1.22091	0.954048	0.298269	0.174276	0.308848	0.682401	0.814351	0.826967	0.814351	0.594923	0.907391	0.314909	0.367495	0.374208	1.23973	0.721714	0.94589	0.699597	0.708856	0.549909	0.631653	0.481012	0.513777	0.902609	0.671813	0.594923	F45D11.5	-2.1373	-0.534372	-0.541705	-1.67082	-0.257923	-0.779954	-1.04864	-0.64552	1.29783e-06	6.32772e-06	0.0140572	0.0856602	0.0173052	0.0415511	0.00166155	0.00688527
WBGene00018465	F45E1.4	13.1945	12.0826	13.0568	1.13025	1.24867	0.94589	13.2191	10.5761	10.5147	6.92635	7.19391	6.99968	1.17923	0.853299	1.12626	9.19025	8.28732	8.18876	12.1878	9.99339	11.1859	1.98322	2.16391	1.57111	9.45682	10.3616	9.78695	F45E1.4	-3.51303	-0.165341	-0.857791	-3.5996	-0.585504	-0.198102	-2.72608	-0.373149	1.73266e-15	3.65184e-14	0.0413413	0.166545	3.74979e-10	8.02002e-09	0.0178363	0.0490208
WBGene00018489	F46E10.2	3.66831	3.11141	2.79177	1.17421	1.40723	0.94589	2.95636	2.71835	2.175	2.36751	1.6095	2.43714	1.17923	1.70285	1.18521	3.39893	2.60803	2.59059	2.09175	2.17305	2.6424	1.56849	2.26921	1.25903	3.3307	2.70038	2.35137	F46E10.2	-1.43853	-0.28208	-0.582949	-1.23305	-0.176915	-0.473151	-0.91219	-0.198858	1.63321e-06	7.8267e-06	0.101572	0.290679	0.00406436	0.0120783	0.0122592	0.0359272
WBGene00018532	F47B7.1	44.6855	43.4427	47.2675	44.553	47.2583	45.6218	48.6564	33.5938	30.7935	30.6034	29.1642	29.4693	33.1537	31.5871	31.1019	28.2775	29.4977	29.6694	37.1159	31.3562	31.1474	32.2559	32.2974	26.1678	38.835	33.774	33.3871	F47B7.1	0.0207293	-0.28207	-0.598699	-0.495982	-0.625712	-0.43971	-0.572214	-0.354904	0.825996	0.867283	0.00650278	0.0526744	2.72626e-06	2.1337e-05	0.000125195	0.000783233
WBGene00018543	ugt-32	2.36924	2.6262	2.29281	0.298269	0.287354	0.151511	1.90174	2.06303	2.2468	0.573975	0.629408	0.346131	0.234285	0.174276	0.163406	0.62757	0.196961	0.567005	1.25092	1.06164	1.20431	0.204483	0.201717	0.221458	1.46724	1.58681	1.46724	ugt-32	-3.37172	-0.233834	-2.31061	-3.70712	-2.58812	-1.04777	-3.5652	-0.686216	9.89285e-09	7.00119e-08	0.115526	0.31481	1.76728e-08	2.62104e-07	4.08737e-06	4.5975e-05
WBGene00018560	F47D12.3	1.32637	1.49143	1.33114	0.992178	1.15628	1.18946	1.4949	0.976111	0.869947	0.883033	0.771209	1.15263	0.865354	1.12379	0.689154	1.07869	0.973362	0.743452	0.819985	0.94589	1.12898	1.01875	1.17673	0.953094	1.04747	1.27082	1.46724	F47D12.3	-0.321104	-0.335172	-0.564915	-0.641357	-0.602161	-0.534799	-0.389027	-0.141589	0.111232	0.167878	0.0950633	0.279037	0.0136491	0.033844	0.0152696	0.0430919
WBGene00018601	F48C1.9	1.07869	0.819985	0.545169	11.8771	11.5655	11.5552	0.610753	0.341222	0.672945	0.204483	0.240311	0.227103	1.4621	1.44118	1.66622	0.204483	0.165854	0.210348	0.292279	0.174276	0.34017	2.42501	2.95636	2.91379	0.439527	0.513777	0.454863	F48C1.9	3.88666	-0.615344	-1.81862	0.941392	-2.0356	-1.5922	1.79914	-0.751017	9.13145e-17	2.39918e-15	0.0250385	0.122474	7.16702e-05	0.000360677	0.000124932	0.00078272
WBGene00018627	F49D11.3	0.37194	0.519484	0.413184	0.0162814	0.0176617	0.12278	0.346131	0.373631	0.374786	0.204483	0.20813	0.163406	0.0654893	0.0293713	0.049777	0.0557608	0.165854	0.210348	0.231815	0.324738	0.18888	0.0899412	0.165854	0.0562908	0.402362	0.343787	0.246492	F49D11.3	-3.68149	-0.228622	-1.15941	-3.19934	-1.69676	-0.820977	-2.1247	-0.391985	5.28559e-05	0.000185669	0.483554	0.709101	0.00956454	0.0250086	0.0366962	0.0882976
WBGene00018637	F49E8.6	7.40977	8.15585	7.31271	7.91427	7.7178	8.0595	6.99486	6.11318	5.14818	4.96778	4.81452	6.23514	7.9633	7.08797	6.67441	4.87813	5.3106	5.43726	5.23661	5.24362	5.52337	6.99111	6.82331	6.41577	6.3679	6.28329	6.27524	F49E8.6	0.0550138	-0.323006	-0.507145	-0.0709427	-0.537181	-0.508433	-0.167446	-0.267739	0.525512	0.60986	0.001291	0.0204991	1.4706e-05	9.15735e-05	1.0768e-05	0.000101801
WBGene00018643	drd-50	3.27753	3.02367	2.82412	0.100299	0.052684	0.151511	4.63476	3.94278	4.28488	1.35842	1.79548	1.74784	0.0432314	0.0293713	0.049777	1.52847	1.18748	1.15628	4.04917	3.62511	3.80135	0.0169575	0.052684	0.0562908	4.7625	4.69351	5.3276	drd-50	-5.03966	0.492729	-0.903782	-6.27563	-1.26745	0.334123	-6.37842	0.693139	1.37261e-09	1.11082e-08	6.16436e-05	0.0048662	9.72147e-07	8.7252e-06	0.00432336	0.0152145
[truncated: 399 more rows]

## Sheet: Down after cbp-1 RNAi(2590)
Gene ID	Symbol	ev_1	ev_2	ev_3	cbp-1_1	cbp-1_2	cbp-1_3	atfs-1_1	atfs-1_2	atfs-1_3	cco-1+ev_1	cco-1+ev_2	cco-1+ev_3	cco-1+cbp-1_1	cco-1+cbp-1_2	cco-1+cbp-1_3	cco-1+atfs-1_1	cco-1+atfs-1_2	cco-1+atfs-1_3	mrps-5+ev_1	mrps-5+ev_2	mrps-5+ev_3	mrps-5+cbp-1_1	mrps-5+cbp-1_2	mrps-5+cbp-1_3	mrps-5+atfs-1_1	mrps-5+atfs-1_2	mrps-5+atfs-1_3	Gene ID	cbp-1_logFC	atfs-1_logFC	cco-1_logFC	cco-1+cbp-1_logFC	cco-1+atfs-1_logFC	mrps-5_logFC	mrps-5+cbp-1_logFC	mrps-5+atfs-1_logFC	cbp-1_P.Value	cbp-1_adj.P.Val	atfs-1_P.Value	atfs-1_adj.P.Val	cco-1_P.Value	cco-1_adj.P.Val	mrps-5_P.Value	mrps-5_adj.P.Val
[truncated: 2,590 more rows]

[truncated: 3 more sheets: Up after cbp-1 RNAi(2444), 709 genes_E.D.Fig.2i, 190 genes_E.D.Fig.2j]
