# Supplementary material for: A conserved role of CBP/p300 in mitochondrial stress response and longevity
Source: Research Square preprint supplement (doi:10.21203/rs.3.rs-86465/v1), 2020-10-14
Supplement: Supplementary file 5 [file ea2e2c53e8b95e45c9d882e7.xlsx]

## Sheet: Key notes
Supplementary Table 6. RNA-seq Results for HepG2 Cells Treated with or without CBP/p300 Inhibitor A-485 and/or Dox
Gene ID	Ensembl Gene ID
Symbol	Gene name
X_1	Normalized counts for given Condition_X (see below), replicate 1 of 3
X_2	Normalized counts for given Condition_X (see below), replicate 2 of 3
X_3	Normalized counts for given Condition_X (see below), replicate 3 of 3
X_logFC	Log2 fold change for given Condition_X (see below) relatively to Condition_WT
X_P.value	P-value for the comparasion of Condition_X (see below) versus Condition_ctrl (Limma-Voom)
Adjust_P.value	Benjamini-Hochberg adjusted P-value
Dox.effect.in.A-485_logFC	Log2 fold change for Condition_A-485-Dox relatively to Condition_A-485
A-485.effect.in.Dox_logFC	Log2 fold change for Condition_A-485-Dox relatively to Condition_Dox
CBP/p300 activity_dependency	Fold change for the A-485.effect.in.Dox_logFC relatively to Dox_logFC
Treatment Conditions:
DMSO	HepG2 cells treated with DMSO control
A-485	HepG2 cells treated with A-485 (5 μM) for 24 h
DMSO_Dox	HepG2 cells treated with Dox (30 μg/ml) and DMSO control for 24 h
A-485-Dox	HepG2 cells treated with Dox (30 μg/ml) and A-485 (5 μM) for 24 h

## Sheet: All genes
Gene ID	Gene name	DMSO-1	DMSO-2	DMSO-3	A-485-1	A-485-2	A-485-3	DMSO_Dox-1	DMSO_Dox-2	DMSO_Dox-3	A-485_Dox-1	A-485_Dox-2	A-485_Dox-3	Gene name	A-485 _logFC	A-485 _P.Value	A-485 _adj.P.Val	Dox_logFC	Dox_P.Val	Dox_adj.P.Val	Dox.effect.in.A-485_ logFC	Dox.effect.in.A-485_ P.Value	Dox.effect.in.A-485_ adj.P.Val	A-485 .effect.in.Dox_ logFC	A-485 .effect.in.Dox_ P.Value	A-485 .effect.in.Dox_ adj.P.Val	CBP/p300 activity_dependency	Gene group
ENSG00000000003	TSPAN6	111.516	109.567	110.116	153.803	156.585	153.72	86.7088	96.1776	97.191	130.163	132.179	130.952	TSPAN6	0.486875	3.81535e-06	0.037253	-0.241621	0.0220265	1	-0.238903	0.0228905	1	0.489595	3.47055e-06	0.0335129	-2.02629	NA
ENSG00000000419	DPM1	64.5535	62.7844	63.7347	46.7724	45.3572	46.9296	65.9692	58.278	59.0225	49.2219	48.8309	50.5992	DPM1	-0.458688	2.85492e-05	0.26645	-0.0606965	0.581694	1	0.0963099	0.379267	1	-0.301682	0.00585198	1	4.97033	NA
ENSG00000000457	SCYL3	4.79167	5.17036	5.23862	8.27439	7.16325	8.20075	2.72547	5.38343	5.6067	8.90275	8.1931	8.3667	SCYL3	0.639884	0.00633595	1	-0.142043	0.543976	1	0.107703	0.642916	1	0.889634	0.000149354	1	-6.26311	NA
ENSG00000000460	C1orf112	15.3235	16.1163	15.0338	5.42115	4.88606	4.92749	2.98769	15.0266	15.0775	6.27174	6.13514	6.49899	C1orf112	-1.61473	0.000435176	1	-0.489469	0.274914	1	0.313134	0.487785	1	-0.81213	0.0723894	1	1.6592	NA
ENSG00000001036	FUCA2	134.041	136.941	132.627	92.9755	91.5963	92.5295	243.066	124.013	129.113	88.9074	89.8775	89.4586	FUCA2	-0.542693	0.0182637	1	0.297743	0.194237	1	-0.0468855	0.838222	1	-0.887322	0.000122176	1	-2.98016	NA
ENSG00000001084	GCLC	79.1332	78.4678	77.5339	68.4542	67.5154	67.4721	44.3953	100.503	101.809	77.4742	76.9236	79.4789	GCLC	-0.208956	0.419898	1	0.0697301	0.788595	1	0.201216	0.437175	1	-0.077471	0.765574	1	-1.11101	NA
ENSG00000001167	NFYA	30.4655	30.9591	29.5891	53.5126	52.5569	52.3756	7.75541	27.1269	26.8488	63.6718	61.3902	61.2061	NFYA	0.800439	0.0272828	1	-0.559646	0.121864	1	0.233519	0.516915	1	1.59361	1.56025e-05	0.144307	-2.84753	NA
ENSG00000001460	STPG1	5.67245	5.32318	5.84008	6.63412	7.49051	7.29778	11.7365	8.53051	8.22627	8.69613	9.78592	9.60719	STPG1	0.348889	0.0346531	1	0.757425	4.61239e-06	0.0599519	0.392286	0.0149925	1	-0.0162969	0.913	1	-0.0215162	NA
ENSG00000001461	NIPAL3	19.9336	20.0705	19.0206	32.3684	31.5168	31.0289	32.9528	27.8842	27.2853	30.3641	29.6185	30.7374	NIPAL3	0.686278	7.55011e-09	8.08088e-05	0.577654	1.26336e-06	0.0165197	-0.0652688	0.578202	1	0.0433474	0.718674	1	0.0750404	Dox.only
ENSG00000001497	LAS1L	44.5954	44.9042	45.416	20.7073	21.9718	22.1121	45.325	43.5691	43.0028	23.5042	23.4728	23.8101	LAS1L	-1.05926	2.16694e-23	2.70889e-19	-0.0329877	0.75566	1	0.127873	0.229332	1	-0.898397	2.36197e-17	2.86649e-13	27.2343	NA
ENSG00000001617	SEMA3F	28.1417	26.8329	28.2143	29.2119	28.3533	28.969	46.1117	32.5123	31.6177	28.4631	26.9263	26.5977	SEMA3F	0.0568968	0.71613	1	0.405197	0.00935434	1	-0.0779441	0.617009	1	-0.426248	0.00616104	1	-1.05195	NA
ENSG00000001629	ANKIB1	35.9188	34.9134	34.0742	56.9861	54.0432	54.887	15.6221	36.1306	34.0358	53.988	54.1309	52.6481	ANKIB1	0.661816	0.0100864	1	-0.289375	0.259275	1	-0.0455102	0.85914	1	0.905684	0.000449345	1	-3.12979	NA
ENSG00000001630	CYP51A1	10.8072	10.118	11.1673	5.98629	6.23601	6.16907	0.222418	7.77319	6.93328	7.04314	7.31917	7.29346	CYP51A1	-0.806215	0.299883	1	-1.10715	0.156941	1	0.23679	0.760219	1	0.537764	0.487806	1	-0.485721	NA
ENSG00000001631	KRIT1	4.39813	5.18946	4.63716	5.61413	5.79966	5.05447	4.46569	4.12123	4.29691	5.5279	6.09285	5.94147	KRIT1	0.213289	0.113779	1	-0.145418	0.306451	1	0.0929261	0.478988	1	0.451638	0.000884092	1	-3.10579	NA
ENSG00000002016	RAD52	9.08312	8.66617	8.60679	9.26682	9.01772	9.47055	5.30004	9.23734	9.46889	8.765	9.70134	9.16117	RAD52	0.0748931	0.711586	1	-0.130329	0.512896	1	-0.00667728	0.976171	1	0.19855	0.317966	1	-1.52345	NA
ENSG00000002330	BAD	2.18681	1.88468	1.66424	4.05656	3.93156	3.88343	7.94612	1.79879	2.06356	3.93001	3.69658	3.83681	BAD	1.06151	0.0274307	1	1.04803	0.0292259	1	-0.050861	0.917976	1	-0.0375094	0.938218	1	-0.0357904	NA
ENSG00000002549	LAP3	125.458	125.136	127.747	52.6029	52.0251	51.6279	86.0651	107.975	105.1	40.1718	41.177	41.0655	LAP3	-1.27627	1.46833e-25	1.85068e-21	-0.338521	0.00488041	1	-0.352375	0.00363161	1	-1.29012	6.07558e-26	7.685e-22	3.81105	NA
ENSG00000002586	CD99	217.097	209.284	213.704	171.391	178.252	180.089	465.289	189.563	192.05	164.38	164.895	162.02	CD99	-0.273042	0.363834	1	0.403861	0.179511	1	-0.108693	0.717625	1	-0.785596	0.00933916	1	-1.94521	NA
ENSG00000002822	MAD1L1	35.5252	35.8494	36.3082	19.6873	20.7718	21.9146	76.8873	32.9835	32.407	14.6744	15.1423	15.0988	MAD1L1	-0.78866	0.00733068	1	0.401479	0.169742	1	-0.47453	0.106101	1	-1.66466	2.82893e-08	0.000298707	-4.14633	NA
ENSG00000002834	LASP1	378.561	392.785	386.477	421.594	424.42	429.887	150.668	296.867	304.322	400.427	397.05	390.466	LASP1	0.140111	0.537652	1	-0.622799	0.00633755	1	-0.103057	0.650237	1	0.659854	0.00383887	1	-1.0595	NA
ENSG00000002919	SNX11	13.3371	12.6969	12.7139	20.3352	20.3764	20.9693	18.0298	12.5359	13.096	20.8318	21.5135	21.1619	SNX11	0.671973	7.70324e-06	0.0740744	0.169294	0.260507	1	0.0421634	0.7773	1	0.544837	0.000291054	1	3.2183	NA
ENSG00000003056	M6PR	53.2158	53.5577	54.4895	64.2915	64.5292	62.8021	19.0072	53.3806	52.6751	63.0657	63.3213	63.8543	M6PR	0.248978	0.420563	1	-0.366349	0.236168	1	-0.0104448	0.973275	1	0.604885	0.0509068	1	-1.65112	NA
ENSG00000003249	DBNDD1	35.3753	36.1551	37.03	40.1148	41.3619	42.2737	60.7963	30.0889	31.8696	31.3283	30.9576	31.0579	DBNDD1	0.189067	0.42669	1	0.176414	0.457602	1	-0.407145	0.0870263	1	-0.394492	0.097246	1	-2.23616	NA
ENSG00000003393	ALS2	32.4706	32.7739	31.4966	70.8526	68.6745	68.5444	11.5457	35.2891	35.5807	67.6941	65.9008	68.0497	ALS2	1.1056	0.000969548	1	-0.230529	0.486856	1	-0.0452847	0.89136	1	1.29085	0.000124421	1	-5.59949	NA
ENSG00000003400	CASP10	25.3307	27.6926	26.2381	37.8957	38.0348	37.2368	18.3397	30.072	31.4162	36.9622	37.1738	36.2708	CASP10	0.514277	0.00574036	1	0.0118852	0.954097	1	-0.0356588	0.847981	1	0.466733	0.0119963	1	39.2702	NA
ENSG00000003402	CFLAR	52.5786	53.8825	52.1695	79.0953	79.2422	81.5105	53.1441	58.9511	57.0242	71.4271	73.5125	72.3008	CFLAR	0.596749	2.02924e-08	0.000214958	0.0928686	0.385634	1	-0.142883	0.176183	1	0.360997	0.000673447	1	3.88718	NA
ENSG00000003436	TFPI	566.841	557.948	563.254	413.296	410.497	403.616	771.901	684.261	690.894	398.719	400.349	404.599	TFPI	-0.459764	3.21138e-05	0.298594	0.346981	0.00168073	1	-0.0281833	0.798535	1	-0.834928	5.61202e-14	6.58739e-10	-2.40627	NA
ENSG00000003509	NDUFAF7	23.363	24.3687	23.437	24.5116	25.2171	24.4683	23.7511	23.3067	22.4828	24.7163	26.7007	25.2876	NDUFAF7	0.060279	0.571391	1	-0.0337932	0.755496	1	0.0479647	0.649704	1	0.142037	0.181769	1	-4.20312	NA
ENSG00000003756	RBM5	42.6652	43.1467	42.34	63.2853	64.2019	65.0031	25.0384	44.2928	47.4359	68.7272	68.4803	70.6979	RBM5	0.587272	0.00456306	1	-0.133306	0.518181	1	0.111192	0.58965	1	0.831771	6.15571e-05	0.539609	-6.23956	NA
ENSG00000003987	MTMR7	1.19359	1.04416	1.02841	0.583059	0.754408	0.821807	1.22364	1.0583	1.543	1.06483	1.21575	0.90981	MTMR7	-0.617749	0.00895426	1	0.237675	0.298011	1	0.583685	0.0110904	1	-0.271967	0.219467	1	-1.14428	NA
ENSG00000003989	SLC7A2	192.641	201.643	198.1	218.366	212.86	203.82	136.579	390.859	397.871	269.469	264.875	270.807	SLC7A2	0.100343	0.752728	1	0.643563	0.0440959	1	0.342441	0.282596	1	-0.20078	0.528485	1	-0.311981	NA
ENSG00000004059	ARF5	46.8817	47.4448	47.9593	73.1269	76.0242	77.0521	112.002	44.8145	43.1203	66.8951	68.0574	64.1191	ARF5	0.669159	0.0339912	1	0.490516	0.119453	1	-0.184409	0.55734	1	-0.00576777	0.985065	1	-0.0117586	NA
ENSG00000004142	POLDIP2	112.284	108.211	113.518	66.0558	65.2655	65.5533	171.026	117.197	118.013	62.5836	63.4622	62.3908	POLDIP2	-0.762907	1.01919e-06	0.0102184	0.282092	0.0689986	1	-0.0632287	0.684502	1	-1.10823	1.65568e-12	1.90917e-08	-3.9286	NA
ENSG00000004399	PLXND1	110.691	109.185	108.191	174.176	173.439	171.85	71.762	108.547	108.24	162.149	153.238	156.348	PLXND1	0.663179	3.32164e-05	0.30858	-0.184737	0.246075	1	-0.139074	0.381799	1	0.708842	9.28752e-06	0.0873399	-3.83704	NA
ENSG00000004455	AK2	160.24	156.636	159.195	121.701	116.236	118.97	214.531	132.495	134.654	121.981	124.144	121.558	AK2	-0.415722	0.0207509	1	0.016597	0.925902	1	0.0429272	0.811175	1	-0.389392	0.0302291	1	-23.4616	NA
ENSG00000004478	FKBP4	98.6228	98.7549	99.1177	70.2737	68.4154	70.1387	86.7326	74.939	76.5535	50.4616	51.6783	50.864	FKBP4	-0.505885	4.10575e-06	0.040027	-0.316242	0.00401332	1	-0.448972	4.5133e-05	0.592552	-0.638612	7.15402e-09	7.68914e-05	2.01938	NA
ENSG00000004487	KDM1A	191.761	191.48	193.169	151.17	149.508	152.633	157.891	162.805	165.871	133.387	132.165	130.06	KDM1A	-0.346656	0.000584457	1	-0.244424	0.0153486	1	-0.196457	0.0512459	1	-0.298688	0.00308005	1	1.22201	NA
ENSG00000004534	RBM6	50.1987	52.5262	48.4061	61.9207	62.2247	59.5712	40.8434	46.7835	50.2738	64.4294	65.4779	64.6348	RBM6	0.281914	0.0177218	1	-0.131383	0.269773	1	0.0826294	0.485402	1	0.495927	3.07862e-05	0.277569	-3.77465	NA
ENSG00000004660	CAMKK1	2.50539	2.53418	2.57502	1.45144	1.50438	1.4426	2.63011	2.13537	2.33223	1.75357	1.66681	1.63459	CAMKK1	-0.80447	8.69411e-08	0.000906013	-0.112678	0.477774	1	0.204601	0.190611	1	-0.487199	0.00113112	1	4.3238	NA
ENSG00000004700	RECQL	20.8893	20.5099	20.8937	26.7722	26.1443	26.895	1.84344	22.2801	19.7121	26.3969	26.5175	26.4026	RECQL	0.357981	0.558397	1	-0.507059	0.407568	1	-0.00897696	0.988591	1	0.856072	0.163738	1	-1.68831	NA
ENSG00000004766	VPS50	12.8311	12.9834	13.4185	18.9706	18.5764	17.9359	7.30248	14.791	13.986	18.0906	18.1447	17.3986	VPS50	0.500902	0.025433	1	-0.118197	0.596161	1	-0.0489876	0.827045	1	0.570115	0.0108575	1	-4.82343	NA
ENSG00000004777	ARHGAP33	6.70315	7.19526	6.78523	4.29089	5.25423	4.72997	4.44185	4.34001	4.36408	4.60498	4.68328	4.57553	ARHGAP33	-0.537399	2.43097e-05	0.227636	-0.657946	5.43357e-07	0.00712722	-0.0426241	0.748132	1	0.0779662	0.568316	1	-0.118499	NA
ENSG00000004779	NDUFAB1	102.258	100.818	100.974	77.0691	76.4196	79.6481	173.076	84.0268	82.8337	66.3992	66.1827	66.9346	NDUFAB1	-0.383262	0.128095	1	0.160655	0.522791	1	-0.224761	0.371918	1	-0.768677	0.00237175	1	-4.78465	NA
ENSG00000004864	SLC25A13	97.9669	98.4493	100.046	72.6307	67.679	67.8108	54.1214	100.57	100.6	71.3306	70.2845	71.3948	SLC25A13	-0.510614	0.0151866	1	-0.215318	0.304579	1	0.033516	0.873413	1	-0.261779	0.212988	1	1.21578	NA
ENSG00000004866	ST7	13.056	13.2699	12.6623	14.8355	14.213	13.6327	13.9296	10.853	10.0734	15.7213	15.3255	16.3811	ST7	0.130997	0.355984	1	-0.165793	0.253595	1	0.152422	0.277232	1	0.449213	0.00162541	1	-2.70948	NA
ENSG00000004897	CDC27	103.252	107.943	106.387	129.599	128.018	124.543	52.119	92.3068	94.9073	129.282	127.358	129.14	CDC27	0.267115	0.182683	1	-0.407731	0.0422052	1	0.0136076	0.946003	1	0.688455	0.000622562	1	-1.6885	NA
ENSG00000004961	HCCS	17.3662	17.1478	16.821	19.3565	19.2855	19.2762	15.9082	17.6857	16.0514	18.0768	18.1447	18.2349	HCCS	0.174453	0.104318	1	-0.0473719	0.662615	1	-0.0890627	0.403153	1	0.132764	0.216948	1	-2.80259	NA
ENSG00000004975	DVL2	66.2214	68.095	68.1683	50.7835	53.0614	53.0952	73.6452	56.9316	57.847	48.4781	51.2554	49.1775	DVL2	-0.367792	0.00470206	1	-0.104645	0.423321	1	-0.0758141	0.560282	1	-0.33896	0.00918096	1	3.23914	NA
ENSG00000005007	UPF1	161.589	165.233	161.394	123.01	121.745	124.359	150	149.947	149.935	109.391	107.004	107.09	UPF1	-0.403532	5.4072e-05	0.495786	-0.117987	0.237586	1	-0.190415	0.0566636	1	-0.475959	1.99389e-06	0.0195421	4.034	NA
ENSG00000005020	SKAP2	30.6716	32.1626	32.2699	45.4629	45.0981	45.3776	37.6967	29.9542	28.7127	42.1554	41.8818	44.8706	SKAP2	0.515756	9.57459e-05	0.861521	0.0175334	0.892236	1	-0.0766676	0.559825	1	0.421555	0.00146367	1	24.043	NA
ENSG00000005022	SLC25A5	287.559	281.951	276.943	171.405	169.539	175.038	702.364	294.376	295.221	182.604	183.952	184.391	SLC25A5	-0.714207	0.0155324	1	0.610033	0.0384573	1	0.0946104	0.74746	1	-1.22963	3.67531e-05	0.329087	-2.01568	NA
ENSG00000005059	MCUB	5.37261	5.4187	5.3761	8.81195	8.63592	9.20248	4.32265	4.82806	4.26333	7.97983	8.65826	8.15762	MCUB	0.724168	1.87516e-09	2.03361e-05	-0.268965	0.0370407	1	-0.104418	0.369992	1	0.888732	5.66717e-13	6.57732e-09	-3.30427	NA
ENSG00000005075	POLR2J	31.5899	32.0289	30.6202	25.3938	26.5398	28.8985	112.884	28.6584	26.2946	25.102	24.2481	24.1586	POLR2J	-0.221621	0.631344	1	0.832852	0.0727588	1	-0.137169	0.766581	1	-1.19165	0.0107717	1	-1.4308	NA
ENSG00000005100	DHX33	65.7903	67.7893	66.0203	22.7749	21.1536	21.6606	62.7272	69.217	70.5419	18.1595	18.7367	19.5172	DHX33	-1.60689	3.30061e-44	4.32347e-40	0.021126	0.852776	1	-0.217752	0.0577353	1	-1.84576	7.03997e-57	9.32162e-53	-87.3693	NA
ENSG00000005156	LIG3	26.5488	27.96	25.9632	24.4289	22.8172	23.2972	19.8177	26.8745	26.7648	25.5428	24.826	24.9809	LIG3	-0.190119	0.17354	1	-0.129806	0.351193	1	0.0952183	0.4951	1	0.0349055	0.79913	1	-0.268906	NA
ENSG00000005175	RPAP3	23.5129	22.9933	22.9902	41.0108	39.862	39.0569	13.0714	25.4271	24.1116	39.6346	38.964	39.9923	RPAP3	0.787965	0.00024487	1	-0.148916	0.48588	1	-0.0162097	0.939938	1	0.920674	1.87594e-05	0.17238	-6.18249	NA
ENSG00000005187	ACSM3	69.2385	64.8666	67.8418	5.79331	5.36332	5.11091	67.5426	78.4563	81.0034	5.96869	6.99497	6.17841	ACSM3	-3.64111	4.74729e-141	6.39934e-137	0.169185	0.190965	1	0.235708	0.0937102	1	-3.57459	2.9804e-137	4.01341e-133	-21.1284	NA
ENSG00000005189	REXO5	13.6744	15.696	13.659	6.74439	6.87689	7.04382	16.0751	11.1222	12.1724	9.06805	8.88379	8.82665	REXO5	-1.06119	1.758e-11	1.98548e-07	-0.131598	0.40587	1	0.375356	0.0174495	1	-0.554246	0.000392904	1	4.21165	NA
ENSG00000005194	CIAPIN1	41.5783	39.8419	41.1199	56.0902	56.5931	57.3984	46.4454	39.6816	37.1423	47.7342	46.5474	47.3655	CIAPIN1	0.473243	8.78604e-05	0.792691	0.00753129	0.948464	1	-0.264072	0.0278971	1	0.201641	0.0958661	1	26.7737	NA
ENSG00000005206	SPPL2B	22.9507	23.3944	23.3683	22.9816	22.5308	24.3554	87.0187	27.2111	27.3861	25.226	23.8816	22.946	SPPL2B	0.0031918	0.994094	1	1.02282	0.00830831	1	0.0445023	0.908249	1	-0.975141	0.0117485	1	-0.95338	NA
ENSG00000005238	FAM214B	4.67923	3.73765	4.20755	8.70168	7.76322	9.18837	3.89356	3.85196	4.01145	8.68235	8.40454	8.26913	FAM214B	1.02765	9.45877e-14	1.10355e-09	-0.103398	0.483212	1	-0.0166747	0.902564	1	1.11438	1.34567e-15	1.60807e-11	-10.7776	NA
ENSG00000005302	MSL3	7.39653	6.77499	7.19765	13.209	13.4357	13.1247	5.18084	8.74929	8.78041	14.7709	14.5362	14.388	MSL3	0.898844	1.80997e-06	0.0179259	0.0934732	0.637173	1	0.136096	0.461786	1	0.941458	5.04817e-07	0.00510118	10.072	NA
ENSG00000005339	CREBBP	76.8657	78.4296	78.8056	122.845	121.554	119.463	48.4955	104.02	104.093	155.234	152.871	150.521	CREBBP	0.636458	0.00920581	1	0.132885	0.586278	1	0.333999	0.170167	1	0.837571	0.000627287	1	6.30299	NA
ENSG00000005436	GCFC2	21.2266	20.4717	20.8422	17.0822	16.1356	16.7084	16.528	18.0896	18.587	15.928	16.3686	16.5205	GCFC2	-0.32555	0.00283732	1	-0.232151	0.0340092	1	-0.0324677	0.768213	1	-0.125862	0.255029	1	0.542153	NA
ENSG00000005448	WDR54	22.8008	22.6685	22.0623	66.7726	67.27	69.2216	39.2223	17.7361	17.9993	68.8511	70.6087	70.1822	WDR54	1.59101	7.2643e-09	7.77789e-05	0.149235	0.579177	1	0.0445921	0.868151	1	1.48636	6.0826e-08	0.000635328	9.95989	NA
ENSG00000005469	CROT	6.79685	6.73679	7.24921	11.1414	11.3222	11.22	2.2487	5.18148	4.95181	6.23042	6.62849	6.88926	CROT	0.698911	0.00552278	1	-0.743709	0.00359444	1	-0.773074	0.00210118	1	0.669611	0.00845428	1	-0.900367	NA
ENSG00000005471	ABCB4	32.3769	33.4425	31.4106	19.3841	19.4764	18.8247	35.8611	37.2413	40.2657	21.8512	22.5002	23.2387	ABCB4	-0.753982	8.25628e-12	9.37584e-08	0.222361	0.0423597	1	0.228902	0.0378851	1	-0.747445	1.02367e-11	1.16525e-07	-3.3614	NA
ENSG00000005483	KMT2E	51.3605	52.7936	50.8807	71.2248	66.6291	65.4122	51.2131	50.6206	50.4585	71.2893	72.1452	71.0603	KMT2E	0.391019	0.000200362	1	-0.0258008	0.808335	1	0.0775969	0.458123	1	0.494416	2.64067e-06	0.0256963	-19.1628	NA
ENSG00000005486	RHBDD2	25.3682	24.0248	23.5229	61.9896	65.6609	69.5461	61.3207	32.142	31.114	54.8283	53.6517	53.9304	RHBDD2	1.43646	2.34186e-09	2.53506e-05	0.772505	0.00115658	1	-0.280129	0.234509	1	0.383821	0.104603	1	0.496853	NA
ENSG00000005513	SOX8	1.32477	1.27339	1.38929	0.817383	0.863495	0.850024	0.913737	1.41171	1.47583	1.71225	1.63862	1.7461	SOX8	-0.676048	0.0010375	1	-0.0479456	0.808013	1	1.03656	1.11501e-07	0.00148575	0.408251	0.0300622	1	-8.51487	NA
ENSG00000005700	IBTK	90.8644	91.3239	87.0541	58.3921	56.1977	54.6895	29.6392	85.1207	87.4516	74.3198	77.0928	76.9979	IBTK	-0.669778	0.0371925	1	-0.412811	0.197701	1	0.43242	0.177455	1	0.175453	0.583373	1	-0.425021	NA
ENSG00000005801	ZNF195	14.1242	13.9385	12.9029	12.4509	12.9312	12.4616	10.473	16.8274	17.7138	13.5587	13.8455	14.4437	ZNF195	-0.114475	0.537598	1	0.139126	0.459302	1	0.145412	0.431657	1	-0.108195	0.564752	1	-0.777675	NA
ENSG00000005810	MYCBP2	29.847	30.195	29.3485	47.8475	46.5708	43.2331	24.4663	33.1013	33.3641	44.3869	40.4158	43.2816	MYCBP2	0.623376	1.46446e-05	0.138655	0.0261455	0.86168	1	-0.103999	0.466615	1	0.493231	0.000588606	1	18.8648	NA
ENSG00000005812	FBXL3	22.2573	23.6237	22.8528	36.0211	33.2213	33.3004	17.1716	25.5954	25.8916	39.7999	40.2044	39.9086	FBXL3	0.577774	0.000331312	1	0.000394706	0.998884	1	0.225939	0.157069	1	0.803317	6.07036e-07	0.00610981	2035.23	NA
ENSG00000005844	ITGAL	1.98067	2.34315	2.16259	0.334952	0.563507	0.553738	2.51092	1.81562	2.01318	0.431182	0.525058	0.380162	ITGAL	-2.23092	1.38204e-20	1.70461e-16	-0.042639	0.871312	1	-0.128426	0.6551	1	-2.31657	2.03175e-21	2.52344e-17	54.3297	NA
ENSG00000005882	PDK2	15.3235	14.397	15.0682	12.4922	12.0994	12.3205	13.0714	13.4615	13.3143	11.644	11.2237	11.001	PDK2	-0.279774	0.00889937	1	-0.168648	0.118322	1	-0.124418	0.245714	1	-0.235537	0.0293594	1	1.39662	NA
ENSG00000005884	ITGA3	0.762569	0.929541	0.71909	6.33088	6.09965	6.01387	0.770706	0.738541	0.669811	6.98804	7.2205	7.3074	ITGA3	2.98713	4.97292e-72	6.63437e-68	-0.155268	0.541978	1	0.223161	0.0813303	1	3.36558	6.27053e-88	8.39624e-84	-21.676	NA
ENSG00000005889	ZFX	45.345	46.3751	47.2376	28.0816	26.5943	26.0203	16.0036	43.4682	45.6727	29.8682	28.7869	30.1938	ZFX	-0.784745	0.0118981	1	-0.401812	0.195527	1	0.138999	0.654682	1	-0.243931	0.43312	1	0.607077	NA
ENSG00000005893	LAMP2	198.601	200.592	199.303	139.468	139.294	139.794	127.997	184.363	188.137	133.91	135.646	138.423	LAMP2	-0.51601	0.000645833	1	-0.257732	0.0876763	1	-0.0369352	0.806859	1	-0.295213	0.0507766	1	1.14543	NA
ENSG00000005961	ITGA2B	0.743829	0.910438	0.839382	1.35495	1.23166	1.45671	1.74809	0.536589	0.619434	1.25768	1.22984	1.23039	ITGA2B	0.717611	0.0632547	1	0.199619	0.613188	1	-0.123761	0.753499	1	0.394173	0.324812	1	1.97463	NA
ENSG00000005981	ASB4	1.13737	1.12057	1.1487	0.762248	0.836223	0.737153	0.746867	1.10879	1.35829	0.596481	0.539154	0.700739	ASB4	-0.562244	0.0181032	1	-0.0631752	0.775737	1	-0.362933	0.147401	1	-0.861831	0.000569693	1	13.6419	NA
ENSG00000006007	GDE1	55.6895	56.1175	54.0427	111.611	109.746	111.111	67.5902	59.7589	59.6942	92.6817	92.2174	93.1522	GDE1	1.00377	3.64339e-20	4.48355e-16	0.173091	0.111554	1	-0.257937	0.0166445	1	0.572738	1.33235e-07	0.00137525	3.30888	NA
ENSG00000006015	REX1BD	12.55	12.6396	12.0781	13.65	14.4311	15.3681	47.3036	12.0478	11.6015	11.4649	10.3356	10.9174	REX1BD	0.221909	0.626301	1	0.929598	0.0423655	1	-0.410223	0.367701	1	-1.11792	0.0149607	1	-1.20259	NA
ENSG00000006016	CRLF1	323.596	315.763	327.93	306.238	312.947	323.012	759.648	332.024	321.416	244.44	250.343	251.907	CRLF1	-0.0379232	0.894994	1	0.546799	0.0576071	1	-0.335555	0.24313	1	-0.920277	0.00148009	1	-1.68303	NA
ENSG00000006025	OSBPL7	3.85467	3.48931	4.19036	6.06899	6.16783	6.66288	1.79576	2.20269	2.36582	3.87491	3.79525	4.05982	OSBPL7	0.715322	7.27097e-07	0.00733204	-0.856806	6.23505e-08	0.000823276	-0.692235	1.06516e-06	0.0141549	0.880022	1.66876e-08	0.00017744	-1.0271	NA
ENSG00000006042	TMEM98	80.7074	79.633	77.637	66.2902	67.1609	70.0541	75.6954	57.9414	58.3676	56.6879	57.8522	54.0001	TMEM98	-0.225841	0.0892387	1	-0.310552	0.0198837	1	-0.272101	0.0407063	1	-0.187388	0.158733	1	0.603403	NA
ENSG00000006047	YBX2	1.71831	1.73186	1.5955	0.486573	0.440784	0.426758	2.48708	1.64732	1.24074	0.624031	0.510962	0.547419	YBX2	-1.96946	3.6263e-12	4.13978e-08	0.0773473	0.756417	1	0.333317	0.302132	1	-1.71362	5.71146e-10	6.30316e-06	-22.1549	NA
ENSG00000006062	MAP3K14	5.67245	5.39959	5.85726	8.72925	8.54047	8.35595	3.53598	4.77758	5.37161	9.316	8.98246	9.04966	MAP3K14	0.600325	0.000106588	0.955881	-0.300461	0.0592339	1	0.0941672	0.535369	1	0.994967	1.99806e-10	2.22304e-06	-3.31146	NA
ENSG00000006118	TMEM132A	35.1692	34.6078	33.6103	23.5468	24.0308	24.6517	47.4705	31.0145	30.9125	19.3579	18.9763	18.8203	TMEM132A	-0.517921	0.00236542	1	0.080267	0.634871	1	-0.338179	0.0474649	1	-0.936364	4.69928e-08	0.000493001	-11.6656	NA
ENSG00000006125	AP2B1	200.175	205.024	200.334	248.718	244.89	237.555	148.069	189.749	190.035	242.842	244.239	244.506	AP2B1	0.272029	0.0310866	1	-0.197833	0.116953	1	0.000835557	0.994876	1	0.470698	0.000195049	1	-2.37927	NA
ENSG00000006194	ZNF263	26.1927	27.1577	26.3928	22.5957	22.6399	22.1544	11.212	27.514	27.3189	23.1598	23.3601	23.6429	ZNF263	-0.243113	0.379733	1	-0.27087	0.326979	1	0.0582421	0.833797	1	0.0860014	0.75461	1	-0.317501	NA
ENSG00000006210	CX3CL1	124.072	122.461	119.464	11.5687	11.6767	12.4757	149.929	112.923	114.235	7.41506	7.8689	8.00431	CX3CL1	-3.36028	2.72907e-107	3.66733e-103	0.04271	0.758167	1	-0.619108	2.2143e-05	0.291512	-4.02208	5.56334e-144	7.49493e-140	-94.1719	NA
ENSG00000006282	SPATA20	46.9566	45.5155	46.8423	54.6567	56.1159	55.3949	62.2742	49.4257	49.0648	53.5334	53.5389	52.1881	SPATA20	0.254426	0.0443116	1	0.205825	0.103905	1	-0.0612856	0.62741	1	-0.0126858	0.91816	1	-0.0616339	NA
ENSG00000006327	TNFRSF12A	48.4933	50.6159	50.7604	71.4591	75.056	77.7434	116.722	52.9599	51.6843	115.7	117.42	107.857	TNFRSF12A	0.581735	0.0354558	1	0.562506	0.0419623	1	0.604711	0.0286584	1	0.623935	0.0241102	1	1.10921	NA
ENSG00000006377	DLX6	8.61462	7.44359	8.40057	6.81331	6.52236	6.31016	9.49563	8.83344	8.88117	5.73452	5.74046	5.88571	DLX6	-0.317783	0.00915169	1	0.152257	0.209948	1	-0.179353	0.143753	1	-0.64939	1.01235e-07	0.00105011	-4.26508	NA
ENSG00000006432	MAP3K9	11.3694	11.2259	10.9954	25.2422	24.208	23.7346	8.39905	12.5527	12.9113	27.4438	28.3358	27.4061	MAP3K9	1.12563	4.04922e-12	4.61854e-08	0.0156904	0.937288	1	0.184992	0.243763	1	1.29493	1.49344e-15	1.78407e-11	82.53	NA
ENSG00000006451	RALA	38.28	39.479	39.0406	32.9749	32.9077	32.9618	53.2156	50.4018	52.2217	32.9124	35.144	33.0093	RALA	-0.241004	0.0235654	1	0.416101	9.05775e-05	1	0.0320737	0.763846	1	-0.625034	4.0779e-09	4.41188e-05	-1.50212	NA
ENSG00000006453	BAIAP2L1	37.4742	35.7348	36.7378	29.8322	30.6987	28.6022	81.3689	38.9243	39.4764	36.976	37.7799	37.6507	BAIAP2L1	-0.303046	0.233931	1	0.53882	0.0343991	1	0.334989	0.187979	1	-0.506882	0.0463692	1	-0.940728	NA
ENSG00000006459	KDM7A	75.7413	78.9835	76.795	104.016	102.205	95.1397	24.6093	98.7861	102.212	160.496	162.893	161.574	KDM7A	0.380487	0.342759	1	-0.0370712	0.926182	1	0.686545	0.0877758	1	1.1041	0.00641057	1	-29.7833	NA
ENSG00000006530	AGK	21.7514	21.5797	21.8904	23.34	22.2308	21.4067	13.7866	18.3757	19.4602	22.0578	22.3734	22.3466	AGK	0.0383812	0.788085	1	-0.33526	0.0184368	1	-0.00433781	0.977201	1	0.369309	0.0091794	1	-1.10156	NA
ENSG00000006534	ALDH3B1	11.2382	11.3979	11.8375	1.3963	1.68164	1.82354	14.5971	10.9371	9.68719	1.27145	1.45537	1.2722	ALDH3B1	-2.83739	2.24221e-45	2.94044e-41	0.0279518	0.873537	1	-0.299589	0.157299	1	-3.16486	9.32795e-54	1.23325e-49	-113.226	NA
ENSG00000006576	PHTF2	11.5193	10.3854	11.6141	19.3565	16.6674	17.9641	3.6075	8.64832	8.29344	17.8702	17.0734	17.6355	PHTF2	0.689048	0.00995372	1	-0.703919	0.00886007	1	-0.0382043	0.886463	1	1.35479	5.69119e-07	0.00573615	-1.92464	NA
ENSG00000006607	FARP2	45.1389	45.8402	44.5568	46.3313	46.2981	43.3883	25.4913	37.3255	36.1348	37.1551	36.6946	37.2186	FARP2	0.00515085	0.973944	1	-0.45283	0.00296594	1	-0.292572	0.054033	1	0.165415	0.275955	1	-0.365291	NA
ENSG00000006625	GGCT	12.194	12.353	12.5249	6.17926	6.24965	6.32427	18.0775	13.2427	12.8945	6.64366	6.62849	6.17841	GGCT	-0.98666	1.33387e-10	1.4842e-06	0.251523	0.0943467	1	0.0529459	0.736805	1	-1.18524	1.04259e-14	1.23453e-10	-4.71227	NA
ENSG00000006634	DBF4	24.806	23.0697	24.1416	10.9209	11.1176	10.2606	17.3624	24.3332	24.7665	14.3714	14.7899	14.6249	DBF4	-1.15902	2.68731e-14	3.15382e-10	-0.113964	0.444407	1	0.439972	0.00371912	1	-0.605093	6.16188e-05	0.540089	5.3095	NA
ENSG00000006652	IFRD1	20.2896	20.6245	20.2407	23.4089	22.0536	22.874	42.6313	70.008	72.6073	90.3676	91.5549	90.2809	IFRD1	0.16042	0.392792	1	1.601	4.70037e-17	6.31119e-13	1.99538	3.13233e-25	4.22395e-21	0.554776	0.00281426	1	0.346518	Dox.only
ENSG00000006695	COX10	15.7546	15.0465	16.1508	12.8782	13.1494	11.9396	23.0359	23.3067	22.382	16.3274	16.8478	17.4962	COX10	-0.307198	0.00567449	1	0.550186	5.90122e-07	0.00773591	0.417158	0.000146879	1	-0.440242	5.4485e-05	0.479958	-0.80017	CBP/p300 activity.dependent
ENSG00000006704	GTF2IRD1	28.2541	29.3163	27.8191	15.759	14.922	14.1547	50.5695	39.9845	41.7938	19.0135	19.3569	19.6566	GTF2IRD1	-0.930664	4.99815e-13	5.77787e-09	0.631824	6.61834e-07	0.00867267	0.372683	0.00372674	1	-1.18982	1.70391e-20	2.1062e-16	-1.88314	CBP/p300 activity.dependent
ENSG00000006712	PAF1	44.7828	44.7322	43.3195	58.2956	59.4294	60.6999	73.1685	37.864	39.191	51.3432	49.9445	48.7733	PAF1	0.425943	0.0619793	1	0.176767	0.437772	1	-0.249902	0.272577	1	-0.000726295	0.996598	1	-0.00410877	NA
ENSG00000006715	VPS41	32.2083	32.6593	31.8403	46.5656	48.0435	47.2118	21.2242	31.0481	30.8621	44.566	44.4754	43.0726	VPS41	0.552812	0.000313147	1	-0.216718	0.157814	1	-0.102356	0.502358	1	0.667177	1.40364e-05	0.130441	-3.07855	NA
ENSG00000006740	ARHGAP44	1.90571	1.98019	2.31725	4.13927	4.25882	4.40546	1.67657	1.54635	1.91243	4.06776	3.80935	3.93438	ARHGAP44	1.05353	7.21371e-13	8.3239e-09	-0.277587	0.0959024	1	-0.117015	0.392188	1	1.21415	1.47815e-15	1.76609e-11	-4.37393	NA
ENSG00000006744	ELAC2	51.1169	52.125	52.2555	39.9908	38.1848	38.3796	58.4124	47.4904	47.6206	31.3421	30.0978	30.5283	ELAC2	-0.416162	0.000710462	1	-0.0193099	0.878898	1	-0.342097	0.00547626	1	-0.738946	2.21964e-09	2.41541e-05	38.2678	NA
ENSG00000006756	ARSD	19.9336	19.9941	20.8593	33.4986	34.3258	35.2192	34.8837	19.4864	19.4602	31.1217	30.2669	30.3889	ARSD	0.762249	0.00032868	1	0.278997	0.187258	1	-0.167193	0.427398	1	0.316055	0.136013	1	1.13283	NA
ENSG00000006757	PNPLA4	13.1122	14.1487	14.2433	11.7617	11.554	12.123	21.3434	13.7476	12.7601	10.4593	10.3075	10.6107	PNPLA4	-0.228536	0.222603	1	0.202789	0.276336	1	-0.176046	0.347775	1	-0.607371	0.00118174	1	-2.99509	NA
ENSG00000006831	ADIPOR2	89.5901	89.7002	90.9894	83.6026	82.7057	81.3976	78.9136	85.2722	90.407	89.1003	90.1876	90.3228	ADIPOR2	-0.125876	0.239156	1	-0.0859642	0.421561	1	0.122287	0.252072	1	0.0823753	0.440436	1	-0.958251	NA
ENSG00000007047	MARK4	52.0539	53.5959	53.3725	64.8567	68.0608	68.7843	118.652	71.8256	72.7585	79.816	78.2063	76.4962	MARK4	0.343162	0.0671304	1	0.726905	0.000111247	1	0.21757	0.244674	1	-0.166177	0.373573	1	-0.22861	NA
ENSG00000007062	PROM1	14.93	15.9443	15.5321	2.98143	3.84974	3.05101	4.34649	8.88393	8.74683	2.34589	2.37159	2.52663	PROM1	-2.24157	5.46291e-18	6.6287e-14	-1.07718	1.48837e-05	0.19197	-0.453018	0.0785967	1	-1.61733	4.27189e-10	4.72557e-06	1.50145	NA
ENSG00000007080	CCDC124	33.7637	35.5629	34.6585	29.9011	31.3532	29.7732	103.443	30.9976	30.3583	27.0994	26.2779	26.5699	CCDC124	-0.192176	0.63164	1	0.664311	0.0983446	1	-0.187455	0.64007	1	-1.04395	0.00983297	1	-1.57147	NA
ENSG00000007168	PAFAH1B1	82.3565	82.3265	82.6721	110.274	105.982	106.723	75.1232	96.6151	98.887	113.826	110.796	113.335	PAFAH1B1	0.384978	0.00276906	1	0.13028	0.312729	1	0.0654145	0.610197	1	0.320111	0.0126955	1	2.45709	NA
ENSG00000007202	KIAA0100	102.146	103.129	102.623	111.873	108.641	105.651	49.3776	93.4681	92.2373	93.0674	90.6528	89.4028	KIAA0100	0.0831705	0.694736	1	-0.38892	0.0667161	1	-0.256128	0.226703	1	0.215965	0.307834	1	-0.555293	NA
ENSG00000007237	GAS7	3.04885	2.87803	3.38269	0.789815	0.808952	0.821807	1.8196	3.11147	2.93675	0.582706	0.384101	0.477729	GAS7	-1.98446	3.32887e-16	3.98166e-12	-0.235541	0.286256	1	-0.781539	0.0048202	1	-2.53006	2.80676e-22	3.49975e-18	10.7415	NA
ENSG00000007255	TRAPPC6A	5.84111	6.35473	5.94318	4.69062	4.5179	5.12501	28.8049	8.37905	8.42778	4.90803	4.82424	4.89611	TRAPPC6A	-0.341595	0.410727	1	1.33291	0.00144444	1	0.0295881	0.945599	1	-1.64497	9.72104e-05	0.83494	-1.23411	NA
ENSG00000007341	ST7L	6.55323	6.87051	7.09455	8.28817	8.85409	7.70694	7.37399	7.891	8.20948	8.77878	9.74363	9.39812	ST7L	0.277221	0.026235	1	0.196762	0.123493	1	0.168439	0.165375	1	0.248884	0.0430388	1	1.2649	NA
ENSG00000007376	RPUSD1	22.0325	21.6943	22.1138	14.5736	14.6766	15.2834	68.1385	23.6937	22.9194	12.9388	12.3231	12.7433	RPUSD1	-0.565028	0.114672	1	0.801525	0.0254188	1	-0.22919	0.522082	1	-1.59575	1.23434e-05	0.115053	-1.99089	NA
ENSG00000007384	RHBDF1	6.66567	6.01088	6.5962	17.9644	18.0992	19.1633	4.70407	5.41709	4.44804	19.6472	18.5957	18.9736	RHBDF1	1.52273	4.33767e-34	5.5982e-30	-0.40462	0.00250991	1	0.0512047	0.668524	1	1.97857	2.93214e-54	3.87834e-50	-4.88995	NA
ENSG00000007392	LUC7L	27.8981	26.3936	26.7365	31.3622	32.5532	31.9178	28.2328	25.3767	25.7741	30.5294	30.6616	29.5247	LUC7L	0.242369	0.0251826	1	-0.0305888	0.784884	1	-0.0792548	0.461827	1	0.193704	0.0750613	1	-6.3325	NA
ENSG00000007516	BAIAP3	4.41687	5.09395	4.22473	11.679	11.6085	10.8814	6.70651	4.23904	3.8939	10.9828	10.6035	10.109	BAIAP3	1.321	5.69341e-11	6.37776e-07	0.104585	0.602121	1	-0.108736	0.57776	1	1.10767	3.72103e-08	0.000391229	10.5911	NA
ENSG00000007520	TSR3	37.0807	36.518	40.2435	32.0513	34.9531	34.9089	65.6116	36.7701	36.4371	29.4962	29.2943	29.455	TSR3	-0.159869	0.457287	1	0.285405	0.183844	1	-0.20794	0.333495	1	-0.653215	0.00244046	1	-2.28873	NA
ENSG00000007541	PIGQ	13.0373	12.4867	13.0404	19.0533	17.9628	18.5002	65.2064	21.203	19.8968	16.8784	16.284	15.3636	PIGQ	0.526652	0.171286	1	1.46421	0.00018051	1	-0.194487	0.6125	1	-1.13207	0.00348945	1	-0.773158	NA
ENSG00000007545	CRAMP1	10.17	11.3406	10.7549	18.433	19.1628	19.5443	8.78047	14.7405	14.4058	22.7328	23.1204	22.5696	CRAMP1	0.82628	8.3761e-06	0.0803435	0.237127	0.206783	1	0.260355	0.154187	1	0.849497	4.1115e-06	0.0395279	3.58246	NA
ENSG00000007866	TEAD3	44.6891	42.5354	41.8245	40.4181	42.6846	42.7534	45.5157	54.6933	54.7573	46.3016	43.9679	44.4524	TEAD3	-0.036132	0.765624	1	0.264981	0.0287004	1	0.0982914	0.414953	1	-0.202824	0.0931979	1	-0.765429	NA
ENSG00000007923	DNAJC11	47.3127	46.7189	46.4127	34.684	35.2121	34.1752	16.4088	45.8074	45.2194	32.8711	32.3531	33.4413	DNAJC11	-0.432743	0.160839	1	-0.386052	0.210517	1	-0.0770246	0.803009	1	-0.123711	0.689566	1	0.320451	NA
ENSG00000007944	MYLIP	4.07955	3.98599	4.36221	7.14412	7.16325	7.25545	5.2762	4.32318	4.19616	5.99624	5.9237	5.49545	MYLIP	0.798599	5.43197e-09	5.8372e-05	0.143504	0.308947	1	-0.309589	0.0188326	1	0.345506	0.0134525	1	2.40764	NA
ENSG00000007968	E2F2	14.3303	15.1993	14.2089	0.95522	0.699865	0.77948	19.6985	16.9452	18.6542	1.38165	1.32851	1.55096	E2F2	-4.21812	2.41964e-132	3.2595e-128	0.338116	0.0129117	1	0.831353	1.14457e-05	0.151106	-3.72506	7.26726e-118	9.77447e-114	-11.0171	NA
ENSG00000008018	PSMB1	185.033	188.003	185.899	157.318	160.744	162.284	228.238	151.294	151.933	143.181	141.454	143.594	PSMB1	-0.218647	0.17922	1	-0.0730056	0.65457	1	-0.165724	0.308588	1	-0.311365	0.0558638	1	4.26495	NA
ENSG00000008083	JARID2	37.1556	39.0014	36.7378	39.4946	39.3983	38.8311	30.1637	33.3033	32.9779	34.1935	32.5222	33.288	JARID2	0.0605569	0.577828	1	-0.226575	0.03776	1	-0.235542	0.0295632	1	0.0515935	0.634881	1	-0.22771	NA
ENSG00000008086	CDKL5	10.3012	10.9776	10.5486	11.6238	11.3085	10.0067	4.13195	9.13637	10.8794	11.0654	11.5761	11.4331	CDKL5	0.0497074	0.861285	1	-0.396067	0.158436	1	0.0489953	0.862422	1	0.494782	0.0776848	1	-1.24924	NA
ENSG00000008130	NADK	77.9713	78.4869	77.3964	53.168	51.2615	50.7813	57.3397	83.6397	83.1528	47.3761	44.1512	45.5396	NADK	-0.591654	0.000121769	1	-0.0606614	0.691562	1	-0.179456	0.243196	1	-0.710447	4.1754e-06	0.0401173	11.7117	NA
ENSG00000008256	CYTH3	4.81041	5.05574	5.01522	13.5398	13.6403	13.7314	2.27254	5.21514	4.64955	13.2556	13.1407	13.7607	CYTH3	1.4645	2.15149e-09	2.33071e-05	-0.287807	0.238189	1	-0.0269088	0.911327	1	1.72541	2.97325e-12	3.41478e-08	-5.99503	NA
ENSG00000008277	ADAM22	7.62141	8.34142	7.85067	14.1325	13.2312	12.9837	3.13073	5.77051	5.1701	11.6991	11.7734	11.6422	ADAM22	0.763007	7.66028e-05	0.694022	-0.754496	0.000129736	1	-0.200896	0.291815	1	1.31665	2.27088e-11	2.56972e-07	-1.74507	NA
ENSG00000008282	SYPL1	52.8223	52.316	54.4551	66.8002	66.8336	66.0048	31.5702	55.6189	54.2199	68.6445	68.9877	71.5202	SYPL1	0.323138	0.095103	1	-0.173769	0.368944	1	0.0671931	0.728224	1	0.564101	0.00361527	1	-3.24627	NA
ENSG00000008283	CYB561	1.69957	1.84647	1.80172	1.13441	0.931674	1.14631	1.03293	1.15927	1.29112	0.624031	0.694206	0.644986	CYB561	-0.752572	1.62093e-05	0.153065	-0.619894	0.000532407	1	-0.736672	0.000212744	1	-0.86896	2.19349e-05	0.200288	1.40179	NA
ENSG00000008294	SPAG9	116.313	115.088	116.405	179.841	174.434	165.19	69.9979	120.799	123.924	218.171	215.583	221.02	SPAG9	0.578864	0.00301178	1	-0.143858	0.459571	1	0.334022	0.0859933	1	1.05674	7.57102e-08	0.00078837	-7.34572	NA
ENSG00000008300	CELSR3	20.0648	21.6561	19.4846	22.3338	21.3718	19.9676	11.7365	20.8664	21.2738	19.0135	18.9481	19.7959	CELSR3	0.0571947	0.781579	1	-0.182074	0.373509	1	-0.140899	0.491744	1	0.0983749	0.628936	1	-0.540302	NA
ENSG00000008311	AASS	16.2605	18.4468	17.1647	37.6613	34.7213	33.0465	3.2976	14.3703	13.9692	25.5842	24.6005	25.19	AASS	1.02452	0.0132664	1	-0.713078	0.0836773	1	-0.484614	0.237427	1	1.253	0.00258567	1	-1.75717	NA
ENSG00000008323	PLEKHG6	25.312	23.9102	25.2586	4.82845	4.23154	4.4619	37.2676	26.6389	26.7144	3.97133	4.02079	4.03195	PLEKHG6	-2.46947	3.41189e-49	4.48971e-45	0.281727	0.0696102	1	-0.170557	0.309781	1	-2.92174	7.32817e-66	9.74794e-62	-10.3708	NA
ENSG00000008324	SS18L2	11.9316	11.8563	11.975	8.82574	9.60406	9.99258	18.6496	9.13637	9.46889	8.57215	9.13752	8.10187	SS18L2	-0.332395	0.18341	1	0.0560298	0.819889	1	-0.139469	0.577833	1	-0.52789	0.0345449	1	-9.4216	NA
ENSG00000008382	MPND	10.4886	9.86965	9.2598	7.61277	7.62686	8.45471	25.2053	9.30466	9.14984	7.07069	7.61518	6.9032	MPND	-0.322989	0.34673	1	0.559219	0.102652	1	-0.134767	0.695643	1	-1.01698	0.00319495	1	-1.81858	NA
ENSG00000008394	MGST1	90.3397	89.2991	87.8102	16.0484	16.9538	16.003	118.343	73.6095	72.9935	16.0933	15.7766	15.7957	MGST1	-2.45039	1.71183e-36	2.21717e-32	-0.0141018	0.940436	1	-0.040072	0.831485	1	-2.47635	3.76076e-37	4.88599e-33	175.605	NA
ENSG00000008405	CRY1	10.9384	11.3215	11.3048	25.766	24.8898	25.3995	5.37155	16.3057	16.1522	31.9206	32.3672	31.504	CRY1	1.18225	0.000344924	1	0.174997	0.596547	1	0.333206	0.305854	1	1.34045	5.08555e-05	0.449766	7.65984	NA
ENSG00000008441	NFIX	49.7489	50.8642	52.0664	26.0416	24.658	26.6834	36.5047	53.4311	53.8841	21.2864	20.1744	21.357	NFIX	-0.981276	7.554e-10	8.27465e-06	-0.0853787	0.587192	1	-0.301203	0.0582526	1	-1.1971	8.51112e-14	9.96908e-10	14.021	NA
ENSG00000008513	ST3GAL1	96.4677	95.8131	94.0998	17.9919	17.2947	16.92	122.967	101.479	104.831	17.9253	17.2566	18.9457	ST3GAL1	-2.45761	2.93238e-83	3.9247e-79	0.201083	0.0939837	1	0.0522149	0.674635	1	-2.60648	1.36917e-92	1.83427e-88	-12.9622	NA
ENSG00000008516	MMP25	0.125409	0.203635	0.134817	2.54035	2.82705	2.69829	0.246257	0.0485388	0.0652938	0.789329	0.962024	0.770429	MMP25	4.42107	6.29544e-48	8.27409e-44	-0.674916	0.32564	1	-1.7141	6.56671e-15	8.83223e-11	3.38421	2.41319e-18	2.94699e-14	-5.01426	NA
ENSG00000008517	IL32	181.229	167.219	173.767	61.2729	63.5065	66.5692	671.922	133.404	135.561	44.8415	45.1802	46.5571	IL32	-1.44887	0.00603644	1	0.849421	0.102914	1	-0.486741	0.348083	1	-2.78503	4.6627e-07	0.00471865	-3.27874	NA
ENSG00000008710	PKD1	39.3669	40.8353	38.8172	50.4389	49.257	48.4111	18.1014	94.1581	93.8158	79.2512	74.2172	75.3532	PKD1	0.315659	0.488107	1	0.792676	0.0831622	1	0.627893	0.168706	1	0.150869	0.739835	1	0.190328	NA
ENSG00000008735	MAPK8IP2	2.52413	2.93533	2.91871	3.82224	4.05428	4.1515	5.25236	3.56587	3.52447	4.61875	3.85164	3.93438	MAPK8IP2	0.52601	0.00574968	1	0.554624	0.00371196	1	0.0450209	0.814872	1	0.0163478	0.959002	1	0.0294755	NA
ENSG00000008838	MED24	125.608	123.378	123.657	137.979	139.813	140.556	34.6692	104.087	105.957	128.965	128.232	126.325	MED24	0.166944	0.611065	1	-0.606577	0.0654864	1	-0.125424	0.702344	1	0.648098	0.0491503	1	-1.06845	NA
ENSG00000008853	RHOBTB2	8.40848	8.58976	8.62397	12.0374	11.5267	11.8408	7.70773	8.36222	8.73004	10.1012	10.4766	9.84414	RHOBTB2	0.467848	3.79322e-05	0.351139	-0.0445736	0.701195	1	-0.21945	0.0487708	1	0.292977	0.0103383	1	-6.57289	NA
ENSG00000008869	HEATR5B	34.8319	34.3594	34.1086	70.2323	68.3745	64.5516	10.6399	39.1094	40.6351	68.796	67.5218	69.0671	HEATR5B	0.976382	0.0107864	1	-0.192164	0.612755	1	0.0157317	0.967106	1	1.18428	0.00206716	1	-6.16285	NA
ENSG00000008952	SEC62	115.845	114.629	116.749	151.474	155.235	149.036	148.284	117.13	120.28	156.9	158.425	159.079	SEC62	0.392445	0.00129447	1	0.151248	0.214696	1	0.0579023	0.634185	1	0.299099	0.0141942	1	1.97754	NA
ENSG00000008988	RPS20	415.441	406.386	408.886	305.934	314.133	321.686	1193.92	408.109	389.609	306.151	322.921	310.071	RPS20	-0.386106	0.288173	1	0.694454	0.0568709	1	-0.00400353	0.991246	1	-1.08456	0.00313392	1	-1.56175	NA
ENSG00000009307	CSDE1	541.28	545.818	548.544	522.505	516.093	509.249	336.632	530.946	550.109	552.97	557.177	564.65	CSDE1	-0.0795988	0.650502	1	-0.206238	0.240527	1	0.11373	0.517375	1	0.240369	0.171367	1	-1.1655	NA
ENSG00000009335	UBE3C	91.3892	91.4386	89.2709	93.9266	92.1963	91.5701	34.7645	88.7895	89.601	94.0317	93.3733	94.1279	UBE3C	0.029373	0.91907	1	-0.351947	0.222603	1	0.0198187	0.945359	1	0.40114	0.16455	1	-1.13977	NA
ENSG00000009413	REV3L	27.3734	26.6419	26.8396	35.1527	34.694	32.6938	14.0011	32.1084	30.7445	30.3778	31.8316	32.8838	REV3L	0.34313	0.181739	1	-0.0720341	0.77816	1	-0.108885	0.671386	1	0.30628	0.232285	1	-4.25188	NA
ENSG00000009724	MASP2	15.3235	17.0332	16.5976	6.37223	6.52236	6.04209	42.0591	16.3393	16.2361	5.00445	4.78195	4.97974	MASP2	-1.37442	3.10328e-05	0.288698	0.608038	0.0606436	1	-0.360846	0.270955	1	-2.34329	5.08355e-12	5.81507e-08	-3.85386	NA
ENSG00000009780	FAM76A	6.92803	6.8132	6.21814	5.8898	5.85421	5.901	7.44551	7.01587	7.25233	5.92737	5.57131	5.76027	FAM76A	-0.177883	0.135439	1	0.121567	0.31288	1	-0.0319825	0.792879	1	-0.331436	0.00520882	1	-2.72636	NA
ENSG00000009830	POMT2	14.0117	12.6587	13.1607	13.2917	12.0312	12.9272	19.5078	14.4713	15.4133	13.049	13.3662	12.7711	POMT2	-0.058606	0.680552	1	0.308352	0.0286962	1	0.0349922	0.805787	1	-0.331973	0.0179014	1	-1.0766	NA
ENSG00000009844	VTA1	91.8951	88.0192	90.8347	80.1153	78.2877	78.082	44.4191	74.8548	76.8054	75.5044	75.3731	75.3114	VTA1	-0.19528	0.299447	1	-0.465053	0.0136353	1	-0.0642458	0.732928	1	0.20553	0.27446	1	-0.441949	NA
ENSG00000009950	MLXIPL	92.9446	90.6553	89.2022	12.6438	12.5085	12.4757	159.989	106.141	107.216	14.6193	12.9715	13.8862	MLXIPL	-2.86092	6.87642e-57	9.10231e-53	0.452403	0.00698952	1	0.140855	0.411967	1	-3.17247	5.70847e-68	7.60482e-64	-7.01248	NA
ENSG00000009954	BAZ1B	109.979	111.363	108.93	102.307	96.2325	91.6407	107.496	135.104	140.045	107.035	106.214	107.731	BAZ1B	-0.186745	0.146325	1	0.21276	0.0982707	1	0.145576	0.257088	1	-0.253931	0.0482855	1	-1.19351	NA
ENSG00000010017	RANBP9	55.2022	55.0095	56.311	77.0966	77.2105	76.784	41.9399	63.4951	67.385	89.0314	89.497	90.4343	RANBP9	0.472948	0.00483738	1	0.0543538	0.748454	1	0.219022	0.190325	1	0.637615	0.000146613	1	11.7308	NA
ENSG00000010072	SPRTN	7.19039	7.34808	6.85396	10.8382	9.89041	9.85149	4.10811	7.23466	6.6646	7.88341	8.17901	8.42245	SPRTN	0.517499	0.00683067	1	-0.243039	0.205909	1	-0.321786	0.0897332	1	0.438771	0.0218275	1	-1.80535	NA
ENSG00000010165	EEF1AKNMT	29.5659	30.8827	30.8779	21.9203	21.8354	21.2515	25.6582	29.4494	30.1064	20.7216	19.822	19.2802	EEF1AKNMT	-0.491019	1.77046e-05	0.166813	-0.0988637	0.385398	1	-0.120049	0.295529	1	-0.512201	8.30423e-06	0.0783338	5.18088	NA
ENSG00000010219	DYRK4	5.11025	5.53331	5.54794	8.23304	8.84045	8.32773	20.7951	5.82099	5.52274	8.58593	8.71464	8.52002	DYRK4	0.652538	0.130842	1	0.99069	0.0223725	1	0.023701	0.957301	1	-0.314496	0.462982	1	-0.317452	NA
ENSG00000010244	ZNF207	95.5682	92.8331	90.7832	105.381	103.187	103.929	85.7314	82.0746	84.9999	96.0015	96.6012	98.4626	ZNF207	0.162699	0.11048	1	-0.143302	0.161248	1	-0.102531	0.313611	1	0.20347	0.0462796	1	-1.41987	NA
ENSG00000010256	UQCRC1	239.754	236.295	236.92	189.034	189.924	201.535	547.485	222.078	213.964	179.298	179.075	175.819	UQCRC1	-0.296602	0.338533	1	0.464072	0.134696	1	-0.119939	0.698589	1	-0.880613	0.00475771	1	-1.89758	NA
ENSG00000010270	STARD3NL	32.5643	31.7614	34.4523	47.8337	45.6981	45.9843	30.4259	28.7089	31.2315	50.0346	51.0862	51.1149	STARD3NL	0.498408	4.89533e-06	0.0475778	-0.128796	0.242995	1	0.125947	0.243972	1	0.753152	6.0634e-12	6.92744e-08	-5.84763	NA
ENSG00000010278	CD9	22.2199	22.2865	23.0762	20.1146	20.8673	20.6307	11.1882	18.8974	17.697	16.3825	16.2417	16.4508	CD9	-0.133648	0.454708	1	-0.498294	0.00542439	1	-0.328772	0.0657996	1	0.0358872	0.837386	1	-0.0720201	NA
ENSG00000010292	NCAPD2	317.487	319.144	315.814	165.657	164.534	161.296	190.883	275.915	276.867	168.292	168.08	169.7	NCAPD2	-0.954606	3.06699e-10	3.38687e-06	-0.356828	0.0177038	1	0.0421963	0.779212	1	-0.555582	0.000230172	1	1.557	NA
ENSG00000010295	IFFO1	14.0492	15.6196	15.3087	16.8203	17.8265	17.6819	13.1668	14.0337	15.7659	14.5229	13.3662	14.2765	IFFO1	0.218743	0.0708625	1	-0.0644416	0.597022	1	-0.312089	0.00951786	1	-0.0288982	0.820945	1	0.448441	NA
ENSG00000010310	GIPR	0.443989	0.222737	0.237924	2.27846	1.968	2.28913	0.293934	0.435613	0.35076	1.89132	2.21654	2.02486	GIPR	2.98832	5.3152e-33	6.84279e-29	0.311251	0.417246	1	-0.0930734	0.624259	1	2.58357	8.71662e-27	1.1064e-22	8.30061	NA
ENSG00000010318	PHF7	6.72189	6.92782	7.38668	3.72575	3.75429	3.88343	10.7591	8.37905	8.54532	4.34326	4.21812	4.58947	PHF7	-0.894214	1.0057e-09	1.09893e-05	0.392922	0.00540594	1	0.212425	0.150195	1	-1.07474	8.0401e-14	9.42058e-10	-2.73524	NA
ENSG00000010319	SEMA3G	55.2397	57.3592	56.1048	6.00007	5.44513	5.68937	20.5091	47.9448	48.4099	5.1422	5.57131	4.97974	SEMA3G	-3.30628	1.09367e-28	1.39235e-24	-0.529226	0.0521917	1	-0.127479	0.649107	1	-2.90452	3.5854e-23	4.48784e-19	5.48825	NA
ENSG00000010322	NISCH	55.7644	55.3152	54.0255	90.2463	90.7645	91.7253	35.7896	48.1635	45.0682	76.4136	76.2047	77.653	NISCH	0.724449	2.91374e-08	0.000307312	-0.354908	0.00663736	1	-0.244257	0.0596768	1	0.835103	1.85446e-10	2.06402e-06	-2.35301	NA
ENSG00000010404	IDS	16.1106	16.9759	16.0477	59.0537	60.4657	59.7405	6.87338	13.411	14.3554	54.8283	52.2703	55.7981	IDS	1.86919	1.51596e-15	1.80218e-11	-0.502254	0.0286494	1	-0.138167	0.541717	1	2.23329	5.03912e-21	6.24649e-17	-4.44654	NA
ENSG00000010539	ZNF200	9.08312	9.10554	8.93329	11.8306	11.4449	11.6998	5.06165	9.60759	9.78794	12.8424	13.0702	13.3984	ZNF200	0.36797	0.0890091	1	-0.145111	0.500403	1	0.169008	0.431542	1	0.682091	0.00158573	1	-4.70047	NA
ENSG00000010610	CD4	3.55483	3.14546	3.14211	2.80224	2.43161	2.47255	3.55982	3.38074	2.76883	1.5745	1.79367	1.81579	CD4	-0.356137	0.0253779	1	-0.0250353	0.902325	1	-0.58065	0.000373747	1	-0.911673	2.62053e-08	0.000277068	36.4156	NA
ENSG00000010626	LRRC23	4.71671	4.59728	4.43095	3.72575	3.99973	3.79878	11.1882	5.77051	5.69066	4.82538	5.62769	4.39434	LRRC23	-0.255898	0.319187	1	0.719617	0.00491518	1	0.367992	0.150836	1	-0.607582	0.0166179	1	-0.844313	NA
ENSG00000010704	HFE	5.74741	6.58397	5.54794	8.82574	8.10412	8.63812	5.896	5.06367	4.7503	7.01559	7.26279	7.55829	HFE	0.519008	0.000152521	1	-0.19219	0.183578	1	-0.228432	0.0887305	1	0.482782	0.000566137	1	-2.51201	NA
ENSG00000010803	SCMH1	41.597	43.5861	42.065	21.5344	23.6626	22.6906	69.2351	54.0875	54.1864	28.2565	27.6592	27.6988	SCMH1	-0.907281	1.06452e-11	1.20632e-07	0.479772	0.000280253	1	0.300963	0.0236244	1	-1.0861	3.67459e-16	4.41722e-12	-2.26377	NA
ENSG00000010810	FYN	3.53609	4.40625	4.12163	11.8857	12.9448	12.2077	4.9663	4.76075	5.15331	14.027	14.0569	14.4019	FYN	1.62554	2.39468e-35	3.09728e-31	0.304617	0.0266852	1	0.198374	0.0995991	1	1.51926	9.60535e-33	1.23919e-28	4.98744	NA
ENSG00000010818	HIVEP2	31.5899	32.1626	31.3763	98.4614	91.9508	89.2845	10.1869	40.1528	43.0532	131.596	128.457	130.074	HIVEP2	1.55681	0.000141234	1	-0.0259512	0.94815	1	0.480213	0.230432	1	2.06297	6.82338e-07	0.00684726	-79.4941	NA
ENSG00000011007	ELOA	44.2768	46.356	43.457	81.7693	80.4013	78.7734	38.5549	50.9404	51.3317	92.1996	91.1039	89.152	ELOA	0.845974	3.61694e-10	3.98912e-06	0.0717975	0.597631	1	0.177383	0.183995	1	0.951558	1.79998e-12	2.07412e-08	13.2534	NA
ENSG00000011009	LYPLA2	82.2815	82.8041	82.0878	136.146	140.849	143.9	112.907	73.5926	73.5477	111.498	110.485	113.558	LYPLA2	0.768153	5.36022e-06	0.0520156	0.0727004	0.664722	1	-0.327047	0.051384	1	0.368405	0.0286171	1	5.06745	NA
ENSG00000011021	CLCN6	33.0328	33.4998	31.0841	17.8127	16.8174	17.2586	8.9235	25.2589	25.9084	20.6665	21.0625	20.8692	CLCN6	-0.912854	0.00413166	1	-0.69948	0.0273891	1	0.271126	0.391611	1	0.0577571	0.854103	1	-0.0825716	NA
ENSG00000011105	TSPAN9	54.4714	52.2969	53.0288	65.8629	65.3473	64.7491	67.1373	50.6879	52.1881	52.9411	52.8623	50.7943	TSPAN9	0.294464	0.0266014	1	0.088591	0.504103	1	-0.323659	0.0146593	1	-0.117786	0.374004	1	-1.32954	NA
ENSG00000011114	BTBD7	30.1844	29.1826	29.0564	38.2678	34.5031	35.0217	18.2205	28.5574	27.4701	33.2155	32.9028	32.7863	BTBD7	0.286039	0.086445	1	-0.250562	0.133538	1	-0.124258	0.455334	1	0.412346	0.0134718	1	-1.64568	NA
ENSG00000011132	APBA3	11.257	10.4618	10.858	14.1187	13.8721	14.8884	28.9241	11.2569	10.9466	14.1785	13.5354	12.8408	APBA3	0.397368	0.221674	1	0.649822	0.0459416	1	-0.0805673	0.804455	1	-0.333035	0.303648	1	-0.512502	NA
ENSG00000011143	MKS1	16.2793	14.8555	16.1508	16.7514	16.981	18.0064	14.7878	17.3659	17.2772	18.5176	18.1869	18.0397	MKS1	0.12986	0.274055	1	0.0659772	0.588957	1	0.0816537	0.488159	1	0.145534	0.216568	1	2.20582	NA
ENSG00000011198	ABHD5	5.42883	5.89627	5.7026	6.17926	5.49968	5.53417	6.56348	5.55172	4.91822	6.36817	6.45934	7.26559	ABHD5	0.0157704	0.922998	1	-0.00512016	0.995956	1	0.224236	0.12447	1	0.245118	0.102586	1	-47.873	NA
ENSG00000011243	AKAP8L	27.9918	27.9218	25.3445	29.3911	28.0806	30.8878	24.7285	33.3538	33.5152	33.3945	34.7071	34.5843	AKAP8L	0.12111	0.397813	1	0.174529	0.225806	1	0.217005	0.127408	1	0.163583	0.249665	1	0.937281	NA
ENSG00000011258	MBTD1	57.095	56.2894	54.3176	59.5499	58.8294	58.0474	18.6735	60.8528	60.6513	64.6911	61.9681	61.7915	MBTD1	0.0732121	0.832703	1	-0.258281	0.455508	1	0.095165	0.783408	1	0.42666	0.218075	1	-1.65192	NA
ENSG00000011260	UTP18	61.7238	59.1739	61.243	36.3657	37.0939	37.6037	47.8996	58.2275	59.0561	37.2653	38.0336	38.4591	UTP18	-0.714148	4.08957e-09	4.4061e-05	-0.140321	0.244784	1	0.0346168	0.776117	1	-0.53921	8.94853e-06	0.0842253	3.8427	NA
ENSG00000011275	RNF216	53.3095	52.7172	52.3586	61.3556	60.1112	59.6276	73.9313	52.0175	50.1394	60.3383	60.1498	60.4813	RNF216	0.193413	0.212094	1	0.152083	0.326019	1	-0.000998572	0.995421	1	0.0403307	0.797243	1	0.265189	NA
ENSG00000011295	TTC19	25.1808	25.1901	25.1555	29.1292	28.8306	29.4205	24.3232	25.8984	26.1267	30.5569	29.7313	28.7024	TTC19	0.210552	0.0452346	1	0.0163573	0.882518	1	0.0263917	0.801658	1	0.220586	0.0356817	1	13.4855	NA
ENSG00000011304	PTBP1	548.739	549.332	550.796	366.045	365.186	372.182	443.525	533.353	532.494	408.361	405.282	401.63	PTBP1	-0.579542	9.43991e-07	0.00947578	-0.127455	0.279307	1	0.139321	0.237142	1	-0.312766	0.00800884	1	2.45393	NA
ENSG00000011332	DPF1	2.39295	2.64879	2.43754	5.03521	4.72243	5.15323	5.96752	2.45513	2.09714	4.78405	4.79605	4.68704	DPF1	1.00416	0.00283352	1	0.4886	0.146464	1	-0.0640399	0.848411	1	0.451467	0.178423	1	0.924002	NA
ENSG00000011347	SYT7	7.22787	7.08064	7.21484	0.293601	0.318062	0.342105	3.84588	3.88562	3.62523	0.210783	0.299527	0.268657	SYT7	-4.63267	4.90276e-134	6.60598e-130	-0.928699	1.56212e-11	2.08621e-07	-0.327245	0.294436	1	-4.03071	3.2457e-85	4.3434e-81	4.34017	NA
ENSG00000011376	LARS2	41.7094	43.7389	42.4087	37.8819	39.2483	37.5472	19.6509	36.2652	36.3027	30.1988	29.3225	30.361	LARS2	-0.157056	0.451198	1	-0.470516	0.0242235	1	-0.351786	0.0917051	1	-0.0383194	0.857718	1	0.0814412	NA
ENSG00000011405	PIK3C2A	63.0168	64.9239	64.0269	87.4896	81.833	81.0167	23.1075	59.4055	62.3305	82.9842	82.8861	85.4862	PIK3C2A	0.38318	0.195851	1	-0.406002	0.170649	1	0.00585197	0.984419	1	0.795036	0.00754184	1	-1.95821	NA
ENSG00000011422	PLAUR	3.61105	3.29829	3.64046	13.8844	13.4903	13.3928	4.39417	2.8422	2.76883	16.9197	15.551	15.8654	PLAUR	1.95886	9.20171e-28	1.16825e-23	-0.0905191	0.657563	1	0.246199	0.14088	1	2.29557	2.07122e-36	2.68803e-32	-25.3601	NA
ENSG00000011426	ANLN	135.409	137.419	133.366	39.6462	41.0346	38.3937	39.0316	87.0561	92.1366	43.2436	42.7416	44.0064	ANLN	-1.77106	4.94993e-11	5.55036e-07	-0.89619	0.000677315	1	0.126641	0.629444	1	-0.74823	0.00451625	1	0.834901	NA
ENSG00000011451	WIZ	42.5153	43.9108	43.182	41.7551	44.0754	44.6017	43.0365	57.386	55.9159	50.6545	48.9578	48.4109	WIZ	0.00915028	0.946946	1	0.271552	0.0445294	1	0.182651	0.174305	1	-0.0797541	0.555856	1	-0.293697	NA
ENSG00000011454	RABGAP1	41.3159	42.65	42.7009	71.6796	66.1518	66.4281	19.7462	43.6028	42.902	64.1815	63.3495	63.255	RABGAP1	0.689748	0.00600046	1	-0.252822	0.31216	1	-0.0984941	0.693394	1	0.844078	0.000791444	1	-3.33863	NA
ENSG00000011478	QPCTL	26.5488	24.617	26.1006	14.0773	14.0902	15.2129	65.7785	24.7035	24.5314	16.8095	16.7069	16.0187	QPCTL	-0.834117	0.0122726	1	0.573611	0.0834222	1	0.191789	0.563247	1	-1.21595	0.000284191	1	-2.11981	NA
ENSG00000011485	PPP5C	49.1867	49.0686	51.0526	42.6235	41.6755	43.6564	47.399	48.6684	46.9993	38.932	39.0908	39.3372	PPP5C	-0.222865	0.03323	1	-0.0616412	0.557564	1	-0.124776	0.233078	1	-0.285998	0.00639626	1	4.63973	NA
ENSG00000011523	CEP68	24.5998	25.1519	25.3101	31.4586	32.3077	30.8596	22.3446	25.7637	26.4793	27.7606	28.6459	29.0927	CEP68	0.334496	0.00332313	1	-0.00774968	0.943751	1	-0.146499	0.19565	1	0.195748	0.0853115	1	-25.2588	NA
ENSG00000011566	MAP4K3	80.5949	82.9951	82.6033	78.3785	78.3832	78.2372	25.3483	81.1827	85.0167	75.6284	75.2603	77.1094	MAP4K3	-0.0671633	0.846878	1	-0.361867	0.298128	1	-0.0436488	0.900182	1	0.251057	0.46997	1	-0.693782	NA
ENSG00000011638	TMEM159	8.22108	8.62797	8.55523	11.1552	10.654	10.9802	9.82937	6.69612	6.47989	9.06805	9.29257	9.21692	TMEM159	0.369264	0.0251361	1	-0.149777	0.383833	1	-0.250485	0.125655	1	0.268568	0.110669	1	-1.79312	NA
ENSG00000012048	BRCA1	53.4032	55.4107	55.7955	11.9133	12.2358	11.4599	53.5255	65.4809	65.0509	16.0933	14.8886	16.4229	BRCA1	-2.21154	3.16688e-64	4.20942e-60	0.161802	0.194573	1	0.413677	0.00128299	1	-1.95967	6.65331e-52	8.78703e-48	-12.1115	NA
ENSG00000012061	ERCC1	21.2266	21.9044	21.9248	30.9073	31.6259	33.244	48.7816	19.1666	19.3259	33.6976	33.1002	32.4796	ERCC1	0.558632	0.0752528	1	0.423247	0.177212	1	0.0518338	0.868774	1	0.187212	0.551305	1	0.442323	NA
ENSG00000012124	CD22	0.537689	0.738513	0.873751	0.100628	0.0317095	0.0740361	1.22364	1.09196	1.19037	0.0730342	0.0458052	0.0456476	CD22	-4.14733	2.024e-22	2.51826e-18	0.721371	0.00495711	1	-0.631246	0.591636	1	-5.49416	3.7592e-37	4.88433e-33	-7.61628	NA
ENSG00000012171	SEMA3B	289.902	281.779	287.202	22.2098	23.1308	24.0168	493.753	318.796	315.019	35.6812	36.2435	33.1486	SEMA3B	-3.63206	5.62966e-78	7.52405e-74	0.392586	0.025054	1	0.599922	0.000716433	1	-3.42473	6.81912e-71	9.09466e-67	-8.72351	NA
ENSG00000012174	MBTPS2	38.9359	39.7655	38.0954	42.4029	41.921	40.4113	18.6258	44.3938	45.2194	46.1776	45.0956	47.1425	MBTPS2	0.0949493	0.729181	1	-0.109017	0.689981	1	0.15024	0.583115	1	0.354207	0.195658	1	-3.24909	NA
ENSG00000012211	PRICKLE3	6.66567	5.93447	5.82289	7.98493	8.49956	7.8057	7.66006	7.26831	7.3195	9.0405	8.43273	9.23086	PRICKLE3	0.401145	0.00114344	1	0.272504	0.0303282	1	0.137119	0.251393	1	0.265742	0.0296032	1	0.975185	NA
ENSG00000012232	EXTL3	28.6477	26.852	27.3551	59.9496	58.2703	56.5237	25.8251	27.3962	27.6884	50.5581	47.52	48.9823	EXTL3	1.07742	1.2972e-22	1.61515e-18	-0.0337055	0.760949	1	-0.248968	0.0212899	1	0.862157	4.61011e-15	5.48235e-11	-25.5791	NA
ENSG00000012504	NR1H4	28.985	29.7557	27.6988	0.624411	0.78168	0.694827	80.4392	85.9622	85.4869	2.77292	3.10457	2.93084	NR1H4	-5.42312	5.8804e-234	7.94206e-230	1.54426	7.31977e-36	9.87144e-32	2.11547	1.48995e-34	2.01024e-30	-4.8523	1.65963e-239	2.2415e-235	-3.14215	CBP/p300 activity.dependent
ENSG00000012660	ELOVL5	109.23	108.287	109.325	97.9101	97.6779	96.5646	64.6581	96.9181	100.331	105.616	105.425	104.916	ELOVL5	-0.16192	0.315221	1	-0.319101	0.0479213	1	0.113041	0.483006	1	0.270222	0.0936235	1	-0.846825	NA
ENSG00000012817	KDM5D	36.1437	37.9699	36.7035	89.7501	91.5145	88.1275	16.4565	38.554	38.3514	91.6624	88.4962	93.7097	KDM5D	1.28222	1.8767e-06	0.0185662	-0.246474	0.352875	1	0.023782	0.928566	1	1.55248	9.90839e-09	0.000106049	-6.29874	NA
ENSG00000012822	CALCOCO1	15.9794	15.9061	15.8415	73.6783	76.0105	73.6659	9.25724	14.4544	13.7677	68.6721	67.7614	68.0915	CALCOCO1	2.22859	1.41714e-40	1.84781e-36	-0.345872	0.0341243	1	-0.127115	0.424136	1	2.44736	9.59944e-48	1.26367e-43	-7.07591	NA
ENSG00000012963	UBR7	29.2661	28.705	28.9361	26.1657	25.0535	25.3713	16.2896	27.0428	27.2518	25.8183	25.7422	25.0506	UBR7	-0.182513	0.318043	1	-0.298649	0.102083	1	0.00039263	0.999428	1	0.116533	0.521495	1	-0.390199	NA
ENSG00000012983	MAP4K5	31.3088	33.3088	35.1741	45.4216	45.3845	44.4323	11.9033	31.2333	34.8586	45.6129	45.1661	46.6965	MAP4K5	0.438835	0.157958	1	-0.35489	0.253287	1	0.0236839	0.93944	1	0.817412	0.00880562	1	-2.30329	NA
ENSG00000013275	PSMC4	92.626	93.8837	93.6358	99.5641	101.441	104.198	198.226	81.149	80.147	82.6261	85.2964	84.0227	PSMC4	0.12363	0.683034	1	0.359721	0.235011	1	-0.276749	0.360726	1	-0.51284	0.0908439	1	-1.42566	NA
ENSG00000013288	MAN2B2	32.1333	31.5704	32.6823	34.2567	33.9986	35.2475	19.7701	28.7257	29.8545	26.9892	25.9255	27.3783	MAN2B2	0.10283	0.512497	1	-0.297469	0.0583215	1	-0.366673	0.0193627	1	0.0336315	0.827646	1	-0.113059	NA
ENSG00000013297	CLDN11	6.34709	6.66038	6.76804	2.14062	2.49979	2.33146	5.5861	4.25587	4.44804	1.5745	1.99101	1.92729	CLDN11	-1.51621	3.01323e-20	3.70988e-16	-0.477837	0.00292941	1	-0.349638	0.0466825	1	-1.38793	2.94921e-16	3.54761e-12	2.90461	NA
ENSG00000013306	SLC25A39	216.629	213.2	214.89	131.68	132.49	136.436	538.068	218.156	214.854	128.827	128.119	127.579	SLC25A39	-0.686604	0.0254252	1	0.590882	0.0541004	1	-0.0591204	0.846842	1	-1.33661	1.72804e-05	0.159291	-2.26205	NA
ENSG00000013364	MVP	50.6297	49.6226	48.6124	103.368	105.028	106.399	83.7766	50.9404	52.037	63.8646	61.5875	63.0041	MVP	1.08088	6.08503e-09	6.53106e-05	0.326555	0.0764535	1	-0.740455	6.03849e-05	0.791646	0.0138684	0.942073	1	0.042469	NA
ENSG00000013374	NUB1	37.9052	37.817	37.8892	38.5435	39.0984	38.1257	52.3336	46.6657	45.9414	41.8799	43.5732	43.0168	NUB1	0.0271497	0.808224	1	0.350939	0.00159253	1	0.150295	0.174159	1	-0.173498	0.116466	1	-0.494382	NA
ENSG00000013375	PGM3	62.9419	64.1407	62.8755	40.7765	41.2801	40.5947	34.9791	44.2423	44.7492	36.7418	37.6954	37.8876	PGM3	-0.631476	6.06093e-07	0.00612699	-0.614952	1.21952e-06	0.0159476	-0.126992	0.315548	1	-0.143511	0.259704	1	0.23337	NA
ENSG00000013392	RWDD2A	8.67084	7.27167	8.45212	11.4722	11.6358	11.5728	10.1154	7.85734	7.55459	8.3242	8.58778	9.27267	RWDD2A	0.50878	0.000599317	1	0.0607692	0.679861	1	-0.406652	0.005594	1	0.041366	0.797683	1	0.680706	NA
ENSG00000013441	CLK1	83.9869	86.0707	85.0779	113.734	110.591	111.506	46.3262	92.1385	94.286	142.726	148.572	146.173	CLK1	0.396593	0.0822474	1	-0.132055	0.562093	1	0.381541	0.0942361	1	0.910189	7.34665e-05	0.639012	-6.89248	NA
ENSG00000013503	POLR3B	10.2075	10.5573	10.2737	16.8754	16.3538	15.7349	7.9938	13.9496	13.18	14.6193	14.7335	14.8758	POLR3B	0.659232	0.000507985	1	0.182378	0.344709	1	-0.147045	0.434004	1	0.329806	0.0795385	1	1.80837	NA
ENSG00000013523	ANGEL1	26.2302	26.3936	26.3584	24.4014	21.9445	23.7628	16.4565	29.8028	28.7463	18.3386	18.8635	19.113	ANGEL1	-0.172151	0.392789	1	-0.0730377	0.714957	1	-0.31652	0.116231	1	-0.415628	0.0398621	1	5.6906	NA
ENSG00000013561	RNF14	13.562	13.8621	12.6795	22.4716	21.0582	21.9146	11.9748	16.2383	16.2697	24.5373	25.0797	24.9949	RNF14	0.708003	5.374e-07	0.00544602	0.153047	0.289239	1	0.189385	0.172947	1	0.744334	1.17375e-07	0.00121495	4.86343	NA
ENSG00000013563	DNASE1L1	1.58713	1.73186	2.0423	4.09791	3.76793	3.85522	1.53354	2.00074	1.94601	3.59941	3.9785	3.65562	DNASE1L1	1.13869	1.72429e-12	1.9788e-08	0.0419577	0.84196	1	-0.061902	0.684535	1	1.03481	1.41701e-10	1.58039e-06	24.6633	NA
ENSG00000013573	DDX11	23.4754	22.936	20.7219	13.5949	13.5039	14.0277	20.3183	17.5342	17.4955	12.2501	12.3231	12.5481	DDX11	-0.707939	2.76391e-09	2.98834e-05	-0.280425	0.0188288	1	-0.148133	0.217112	1	-0.575639	1.5598e-06	0.0153734	2.05273	NA
ENSG00000013583	HEBP1	28.985	29.1062	27.3035	28.8811	30.3169	29.0678	51.3323	31.5025	31.5673	29.1105	28.505	28.2842	HEBP1	0.0478104	0.798665	1	0.42109	0.0239391	1	-0.0392434	0.833805	1	-0.412527	0.0266891	1	-0.979664	NA
ENSG00000013588	GPRC5A	4.66049	5.13215	5.20425	2.33359	2.41798	2.27502	6.08671	5.58538	6.00971	4.37081	4.18993	4.7846	GPRC5A	-1.10382	1.34545e-15	1.60041e-11	0.236961	0.0698763	1	0.934124	7.81057e-12	1.04794e-07	-0.406741	0.00169537	1	-1.71649	NA
ENSG00000013810	TACC3	114.008	113.388	112.762	40.2665	40.2165	39.9881	109.308	77.6485	79.6432	36.4663	36.4972	37.2464	TACC3	-1.49821	4.65761e-24	5.83551e-20	-0.35221	0.0153088	1	-0.128532	0.378505	1	-1.27453	5.54809e-18	6.75757e-14	3.61866	NA
ENSG00000014123	UFL1	41.1472	43.4141	41.6526	69.295	67.679	64.7209	23.6081	46.144	46.8482	72.3224	70.933	70.2798	UFL1	0.676696	0.00264282	1	-0.113435	0.612476	1	0.0823319	0.713165	1	0.872463	0.000109961	0.939506	-7.69133	NA
ENSG00000014138	POLA2	3.83593	3.62303	3.65764	1.24468	1.29984	1.03344	10.8544	2.99367	2.73524	1.2439	1.32851	1.14676	POLA2	-1.66015	0.000439151	1	0.576758	0.205066	1	0.0570717	0.913359	1	-2.17987	5.21943e-06	0.0498769	-3.77951	NA
ENSG00000014164	ZC3H3	33.595	35.028	34.7101	21.493	21.9036	23.6359	66.7321	35.205	35.4799	21.5206	21.0625	20.5904	ZC3H3	-0.625062	0.00637004	1	0.410655	0.0719144	1	-0.0856451	0.708682	1	-1.12136	1.1698e-06	0.0116149	-2.73067	NA
ENSG00000014216	CAPN1	120.905	119.176	117.677	152.535	153.735	158.912	182.707	103.078	103.522	128.028	127.457	124.318	CAPN1	0.378897	0.0663169	1	0.121607	0.554976	1	-0.292606	0.155791	1	-0.0353152	0.863516	1	-0.290406	NA
ENSG00000014641	MDH1	179.074	176.389	178.184	212.053	213.01	210.071	195.15	147.675	146.845	192.219	194.608	196.42	MDH1	0.251215	0.0593518	1	-0.124409	0.351448	1	-0.122972	0.355542	1	0.252653	0.0581879	1	-2.03083	NA
ENSG00000014824	SLC30A9	57.02	58.3334	57.0156	64.0021	63.0701	62.3788	23.4412	58.1938	60.1644	62.2943	62.2641	62.4465	SLC30A9	0.136395	0.632215	1	-0.281187	0.323626	1	-0.0187581	0.947735	1	0.398826	0.16171	1	-1.41836	NA
ENSG00000014914	MTMR11	6.00977	6.71769	6.01192	7.17169	6.74054	6.49358	4.41801	4.97953	4.51521	7.40128	7.51651	7.87886	MTMR11	0.124126	0.328115	1	-0.428896	0.00107885	1	0.16041	0.191782	1	0.71345	2.5029e-08	0.000264807	-1.66346	NA
ENSG00000014919	COX15	29.491	29.3736	31.3763	27.2546	27.167	29.1242	38.3165	28.305	29.1661	25.7632	25.8832	25.7336	COX15	-0.111437	0.42472	1	0.0845426	0.542162	1	-0.110709	0.426918	1	-0.306688	0.0276135	1	-3.62762	NA
ENSG00000015133	CCDC88C	19.0153	19.4975	18.1614	10.6314	10.9267	10.9097	7.85076	22.0108	24.1956	8.97162	8.94018	8.54789	CCDC88C	-0.805355	0.0137098	1	-0.0668858	0.835902	1	-0.296122	0.364118	1	-1.03458	0.00163528	1	15.4679	NA
ENSG00000015153	YAF2	7.20913	7.30987	7.85067	14.5046	14.8811	14.1265	21.987	10.1293	10.9298	17.0024	17.2566	16.7435	YAF2	0.962572	0.000227464	1	0.944332	0.000302604	1	0.229576	0.372525	1	0.24778	0.339634	1	0.262387	NA
ENSG00000015171	ZMYND11	46.5818	47.9224	46.0175	65.8353	65.1291	62.7316	16.2896	46.6321	49.6021	66.7574	68.3534	68.9556	ZMYND11	0.463258	0.152585	1	-0.320103	0.322419	1	0.0752773	0.815898	1	0.858641	0.00831076	1	-2.68239	NA
ENSG00000015413	DPEP1	4.92285	4.80741	5.18707	1.10684	1.35438	1.21686	14.6924	4.50831	4.06182	1.49185	1.25803	1.20251	DPEP1	-2.04674	4.88188e-06	0.0474519	0.640982	0.133867	1	0.106307	0.815743	1	-2.58145	1.40057e-08	0.000149175	-4.02733	NA
ENSG00000015475	BID	19.7462	18.7906	20.1548	14.8492	16.3265	15.0718	46.1594	18.2242	17.1261	13.3934	13.2957	13.7747	BID	-0.344383	0.289467	1	0.473245	0.14509	1	-0.193153	0.552732	1	-1.01078	0.00201622	1	-2.13586	NA
ENSG00000015479	MATR3	2.29925	2.80161	2.42036	2.67819	3.12704	2.83938	0.19858	2.55611	2.11393	3.15861	2.86494	2.80539	MATR3	0.203171	0.732967	1	-0.629337	0.29153	1	0.0307564	0.962373	1	0.863359	0.147074	1	-1.37185	NA
ENSG00000015520	NPC1L1	31.2713	32.3918	32.3042	13.526	14.3221	13.1812	32.6429	34.2962	34.7914	19.6059	17.9896	19.0851	NPC1L1	-1.22763	1.02182e-28	1.30119e-24	0.0846327	0.436374	1	0.467042	2.28062e-05	0.300176	-0.845232	9.74444e-15	1.15423e-10	-9.98706	NA
ENSG00000015532	XYLT2	38.0364	38.4856	39.0406	62.665	62.4293	61.9838	51.523	45.9926	46.1933	57.8174	56.0338	57.2755	XYLT2	0.695363	1.78213e-10	1.97781e-06	0.314038	0.00403484	1	-0.128637	0.233463	1	0.252686	0.0200823	1	0.804635	NA
ENSG00000015676	NUDCD3	52.7098	51.7048	49.2825	30.8246	29.5533	31.9178	57.3873	51.0245	52.5071	30.1161	30.6052	31.1137	NUDCD3	-0.736279	6.50495e-11	7.27904e-07	0.0658613	0.556139	1	-0.00719879	0.950446	1	-0.809339	7.26488e-13	8.41854e-09	-12.2885	NA
ENSG00000016391	CHDH	180.423	183.399	182.239	51.6656	51.7388	52.7566	135.101	142.088	137.559	31.9757	30.7462	32.1869	CHDH	-1.80662	3.54394e-66	4.71486e-62	-0.396827	0.000101123	1	-0.718938	4.55151e-12	6.10858e-08	-2.12873	1.13529e-88	1.52049e-84	5.36438	NA
ENSG00000016864	GLT8D1	56.8514	56.8434	54.5754	31.5827	32.6895	32.1858	48.6386	64.6731	65.5043	29.9233	31.3523	29.9847	GLT8D1	-0.803344	6.52821e-09	6.99759e-05	0.0885362	0.521912	1	-0.0800027	0.563186	1	-0.971882	2.58544e-12	2.973e-08	-10.9772	NA
ENSG00000017260	ATP2C1	67.9829	68.3433	68.323	88.8817	89.4555	88.706	31.0695	66.9114	66.5454	87.8605	89.2996	89.7652	ATP2C1	0.384067	0.115238	1	-0.314361	0.197169	1	-0.000637498	0.998157	1	0.697792	0.00432809	1	-2.21971	NA
ENSG00000017483	SLC38A5	69.4634	66.8533	70.4882	7.40601	6.79508	6.93095	167.498	79.9036	76.0497	7.38751	8.30587	7.73948	SLC38A5	-3.29625	3.01579e-29	3.84573e-25	0.645157	0.0166115	1	0.149684	0.585145	1	-3.79173	1.24729e-36	1.61948e-32	-5.87722	NA
ENSG00000017797	RALBP1	76.0598	77.9138	80.1116	78.282	76.4332	77.687	106.972	82.6132	78.0144	82.3368	84.5917	81.2072	RALBP1	-0.0104344	0.93978	1	0.192528	0.159305	1	0.09454	0.489296	1	-0.108424	0.426983	1	-0.563157	NA
ENSG00000018189	RUFY3	12.3814	12.544	11.6313	18.9292	19.5855	18.5426	9.94856	18.7459	18.5702	21.5481	21.0202	21.3849	RUFY3	0.643652	0.00263392	1	0.373922	0.0822283	1	0.164844	0.437274	1	0.434561	0.0406975	1	1.16217	NA
ENSG00000018280	SLC11A1	3.98585	3.45111	3.76075	8.08142	8.0223	7.91857	10.2823	3.26294	3.05429	7.35996	7.74204	7.00076	SLC11A1	1.1073	0.0055234	1	0.566845	0.153935	1	-0.120625	0.75974	1	0.41979	0.290703	1	0.740573	NA
ENSG00000018408	WWTR1	111.591	111.477	112.968	108.248	107.032	104.705	64.6104	88.84	94.202	92.0205	92.5416	91.0336	WWTR1	-0.070634	0.628429	1	-0.439863	0.00262945	1	-0.21552	0.139612	1	0.153712	0.291906	1	-0.349453	NA
ENSG00000018510	AGPS	155.218	157.133	155.414	100.06	100.282	95.8592	91.8579	185.154	191.764	94.376	94.2331	95.438	AGPS	-0.65936	0.00482483	1	0.00334675	0.989146	1	-0.0604703	0.795446	1	-0.723177	0.00201454	1	-216.083	NA
ENSG00000018610	CXorf56	11.3881	12.0856	12.0437	13.3882	12.5221	12.2923	23.1075	11.93	12.0549	14.454	14.0005	13.9419	CXorf56	0.105389	0.65566	1	0.405252	0.0847994	1	0.150607	0.521291	1	-0.149269	0.522256	1	-0.368336	NA
ENSG00000018699	TTC27	55.8769	57.5502	57.5999	43.5194	41.7846	40.3126	50.8794	59.1026	59.0225	44.015	43.0376	43.0447	TTC27	-0.445466	0.000101856	0.915376	-0.0165694	0.883861	1	0.0505895	0.659308	1	-0.378307	0.000972026	1	22.8317	NA
ENSG00000018869	ZNF582	0.537689	0.662102	1.01123	1.46522	1.39529	1.55547	0.723028	0.789029	0.854524	1.31278	1.42718	1.5649	ZNF582	1.01804	6.69746e-06	0.0646171	0.100372	0.733001	1	-0.037394	0.871221	1	0.880213	9.686e-05	0.832221	8.76949	NA
ENSG00000019102	VSIG2	0.856269	1.04416	0.976858	2.85738	2.6907	3.05101	1.89112	0.873175	0.703395	2.1255	2.04739	1.99698	VSIG2	1.6098	2.44541e-07	0.00250875	0.250341	0.444775	1	-0.48485	0.100701	1	0.874569	0.0059546	1	3.49351	NA
ENSG00000019144	PHLDB1	12.625	12.4867	12.7826	30.3697	29.9078	29.8438	5.75297	14.6227	13.9188	27.9259	27.0954	27.1831	PHLDB1	1.25184	8.70607e-06	0.0834303	-0.141756	0.609741	1	-0.13279	0.63159	1	1.26081	7.44174e-06	0.0704435	-8.89425	NA
ENSG00000019186	CYP24A1	8.16486	8.26501	8.19436	6.84088	7.31324	6.0562	1.43819	5.13099	5.25406	3.02086	2.97771	2.77752	CYP24A1	-0.286096	0.437497	1	-1.05856	0.00443922	1	-1.2119	0.00121763	1	-0.4393	0.244236	1	0.414997	NA
ENSG00000019485	PRDM11	10.3762	10.0798	10.5143	13.4019	12.5221	12.4475	8.35137	10.8025	11.4168	10.3904	10.8854	10.6525	PRDM11	0.309853	0.0258505	1	-0.0147852	0.909737	1	-0.265924	0.0538049	1	0.0587191	0.666726	1	-3.97148	NA
ENSG00000019582	CD74	150.664	145.461	152.269	66.4556	67.6381	70.2375	349.648	125.982	127.518	49.6352	50.17	47.6861	CD74	-1.1342	0.000902449	1	0.427663	0.205742	1	-0.470524	0.164473	1	-2.03239	6.64253e-09	7.14404e-05	-4.75231	NA
ENSG00000019995	ZRANB1	15.4922	14.6644	15.4119	17.5233	17.5947	16.7648	1.22364	18.0559	18.0497	20.1155	19.7938	18.89	ZRANB1	0.18756	0.775406	1	-0.287541	0.661405	1	0.180838	0.783015	1	0.655943	0.318903	1	-2.28122	NA
ENSG00000020129	NCDN	12.7374	12.6204	12.542	45.8627	46.939	46.069	17.0286	14.3198	14.2714	39.2213	40.5991	40.3128	NCDN	1.87599	1.36161e-55	1.80073e-51	0.265511	0.02681	1	-0.209263	0.0666456	1	1.40121	2.17143e-32	2.79876e-28	5.2774	NA
ENSG00000020256	ZFP64	28.7226	28.3038	27.7503	32.3546	32.4168	31.2829	20.5806	32.7984	33.6328	33.8216	34.7916	35.2951	ZFP64	0.180386	0.305959	1	0.0391087	0.829285	1	0.113483	0.518381	1	0.254759	0.146619	1	6.51412	NA
ENSG00000020426	MNAT1	18.3219	16.804	17.1475	21.5206	23.9899	22.1685	20.9143	17.5342	18.3183	23.6695	23.2191	23.5314	MNAT1	0.373255	0.00186288	1	0.117421	0.330129	1	0.0573249	0.629987	1	0.313156	0.00915552	1	2.66694	NA
ENSG00000020577	SAMD4A	62.7357	65.3059	60.9508	32.4097	34.2167	32.2564	31.6893	53.4816	52.9437	37.5546	36.1307	38.25	SAMD4A	-0.935131	7.46067e-07	0.0075211	-0.451789	0.0160333	1	0.179022	0.34055	1	-0.304319	0.105701	1	0.673585	NA
ENSG00000020633	RUNX3	2.01815	1.57904	1.54395	1.21711	1.23166	1.32973	2.77315	1.32757	1.17357	1.28523	0.990215	1.09101	RUNX3	-0.453083	0.153299	1	0.0216848	0.932716	1	-0.170509	0.607452	1	-0.645233	0.0401548	1	-29.755	NA
ENSG00000020922	MRE11	45.6636	43.9681	46.3268	20.8176	21.44	21.0116	25.1576	40.9438	41.8777	20.1844	20.7805	20.9528	MRE11	-1.1047	1.65955e-09	1.80211e-05	-0.331485	0.0670233	1	-0.0312025	0.865157	1	-0.804411	1.07464e-05	0.100651	2.42669	NA
ENSG00000021300	PLEKHB1	58.9315	56.3658	57.8233	30.3284	31.6123	32.6655	59.795	34.4981	35.7486	21.1486	20.7805	21.6218	PLEKHB1	-0.872398	1.3154e-05	0.12491	-0.414089	0.0379012	1	-0.574682	0.00406808	1	-1.03298	2.85481e-07	0.00291162	2.49459	NA
ENSG00000021355	SERPINB1	75.5726	75.1057	75.3858	152.439	151.58	153.875	102.681	79.1463	74.9918	128.758	129.543	132.026	SERPINB1	1.01857	7.54914e-14	8.81438e-10	0.183487	0.174708	1	-0.23038	0.0871414	1	0.6047	8.05386e-06	0.0760526	3.2956	NA
ENSG00000021488	SLC7A9	2.74901	2.61059	2.33444	1.68576	1.76346	1.75299	4.77559	5.34977	5.27086	2.46987	2.27292	2.47088	SLC7A9	-0.570974	0.000161119	1	1.01446	6.01882e-13	8.05679e-09	0.478866	0.00127032	1	-1.10671	8.63529e-16	1.03408e-11	-1.09094	CBP/p300 activity.dependent
ENSG00000021574	SPAST	37.0244	35.9641	36.3942	52.3548	52.7751	53.0811	18.1252	43.9057	43.4394	54.787	56.4144	57.0386	SPAST	0.532828	0.0519001	1	-0.0517248	0.849426	1	0.0887189	0.745502	1	0.673272	0.0141074	1	-13.0164	NA
ENSG00000021776	AQR	48.9431	51.189	51.1213	51.707	49.0389	47.8749	22.8214	44.4274	45.7567	47.0455	45.2224	46.4456	AQR	-0.0253484	0.911026	1	-0.419901	0.0632525	1	-0.0995904	0.659171	1	0.294966	0.191244	1	-0.702465	NA
ENSG00000021826	CPS1	67.3083	65.7071	65.8141	84.0988	81.3149	81.186	31.2364	63.596	64.6311	72.9147	72.3284	74.1127	CPS1	0.310766	0.182672	1	-0.317792	0.173025	1	-0.168963	0.468285	1	0.459598	0.0489187	1	-1.44622	NA
ENSG00000021852	C8B	18.6967	17.0523	16.6491	1.17576	0.904402	0.962895	35.575	27.0596	27.9738	1.17503	1.11708	1.14676	C8B	-4.14629	8.26959e-104	1.11069e-99	0.790114	5.05296e-07	0.00662898	0.181575	0.382444	1	-4.75485	3.62983e-134	4.88756e-130	-6.01793	CBP/p300 activity.dependent
ENSG00000022277	RTF2	68.3577	68.3433	71.6568	70.9353	72.3834	73.3273	103.968	63.2594	64.0769	67.8869	69.3965	69.0114	RTF2	0.0562836	0.761423	1	0.150154	0.416897	1	-0.070662	0.702744	1	-0.164533	0.373472	1	-1.09576	NA
ENSG00000022840	RNF10	109.548	108.44	109.411	143.7	140.822	141.643	130.405	131.233	129.264	163.746	166.065	165.951	RNF10	0.380443	0.000138092	1	0.255811	0.0104683	1	0.218282	0.0281597	1	0.342913	0.000580831	1	1.34049	NA
ENSG00000022976	ZNF839	6.19717	7.19526	6.61338	6.46872	5.96329	6.66288	2.53476	6.74661	7.62176	6.62989	6.48753	6.81957	ZNF839	-0.0675243	0.83401	1	-0.239733	0.449224	1	0.0625781	0.84574	1	0.234797	0.457168	1	-0.979409	NA
ENSG00000023041	ZDHHC6	37.3618	35.8303	36.9441	33.54	33.1395	32.0871	26.3733	36.8711	38.1667	36.2184	37.8363	39.9086	ZDHHC6	-0.157335	0.297716	1	-0.117859	0.433947	1	0.206637	0.170423	1	0.16716	0.266559	1	-1.41831	NA
ENSG00000023191	RNH1	78.5335	77.3407	76.8981	58.4472	59.7839	61.49	226.164	79.2305	76.9397	60.7791	60.3471	59.5614	RNH1	-0.373323	0.289625	1	0.715899	0.042939	1	0.00774173	0.982704	1	-1.08148	0.00237374	1	-1.51066	NA
ENSG00000023228	NDUFS1	165.731	167.926	166.55	168.221	167.043	164.047	80.5584	156.174	157.021	157.066	159.834	159.038	NDUFS1	-0.00258295	0.990751	1	-0.345011	0.115925	1	-0.0691816	0.752388	1	0.273247	0.212777	1	-0.791996	NA
ENSG00000023287	RB1CC1	77.5965	78.334	77.3449	97.979	95.7279	92.1486	84.3726	99.9978	103.606	109.129	107.384	113.056	RB1CC1	0.293366	0.0126571	1	0.304452	0.00981689	1	0.205351	0.0799921	1	0.194262	0.0977501	1	0.638072	NA
ENSG00000023318	ERP44	59.8498	60.7786	61.4492	67.8615	67.4336	67.19	63.347	51.9333	55.026	65.614	65.3652	66.3771	ERP44	0.153319	0.184172	1	-0.0971965	0.403611	1	-0.0370303	0.748257	1	0.213486	0.065213	1	-2.19644	NA
ENSG00000023330	ALAS1	26.249	25.6294	26.1178	25.1733	23.9353	26.0908	24.204	25.141	24.5482	25.8459	26.8417	26.8347	ALAS1	-0.0528216	0.618039	1	-0.0777908	0.464407	1	0.0807663	0.442023	1	0.105736	0.316726	1	-1.35923	NA
ENSG00000023445	BIRC3	24.4124	24.1394	23.6604	9.65276	8.73137	9.10372	12.3563	13.8149	13.3815	8.51705	8.08034	8.11581	BIRC3	-1.39632	9.85223e-35	1.27261e-30	-0.868196	1.36983e-14	1.83639e-10	-0.153965	0.185127	1	-0.682067	3.8143e-09	4.12974e-05	0.785614	NA
ENSG00000023516	AKAP11	39.9479	39.9947	39.7108	74.3674	70.3517	64.8338	13.1906	42.7613	42.9356	64.085	62.25	64.4118	AKAP11	0.808918	0.0203644	1	-0.274509	0.428728	1	-0.135718	0.695348	1	0.947711	0.00669047	1	-3.45239	NA
ENSG00000023572	GLRX2	12.3626	12.7733	11.9578	15.8554	17.4856	17.5549	19.9608	17.8203	18.184	21.8787	21.8095	22.8623	GLRX2	0.45755	7.48193e-05	0.678686	0.593434	3.1893e-07	0.00418979	0.387522	0.000598018	1	0.25162	0.0271411	1	0.424006	Dox.only
ENSG00000023608	SNAPC1	4.62301	4.29163	4.86056	5.2971	5.22696	5.11091	9.20956	5.51807	4.81747	5.2524	5.76865	6.09479	SNAPC1	0.183514	0.424468	1	0.501248	0.0269859	1	0.131225	0.562112	1	-0.186544	0.403349	1	-0.37216	NA
ENSG00000023697	DERA	43.5647	43.7007	43.0102	28.3987	30.1123	28.6586	50.2834	43.1484	43.1035	29.51	30.2246	29.1205	DERA	-0.580121	5.01142e-07	0.00508409	0.0669572	0.559115	1	0.0276353	0.811938	1	-0.619444	7.95882e-08	0.000828115	-9.25134	NA
ENSG00000023734	STRAP	108.518	107.313	109.428	119.785	120.722	123.484	80.6061	114.252	116.099	121.802	126.695	126.088	STRAP	0.162352	0.270573	1	-0.0644322	0.661323	1	0.0413988	0.778703	1	0.268184	0.0686266	1	-4.16226	NA
ENSG00000023839	ABCC2	347.921	348.104	345.2	140.323	136.799	129.241	126.066	328.725	339.266	118.344	119.056	120.053	ABCC2	-1.35763	7.32784e-06	0.0705012	-0.390898	0.189433	1	-0.18506	0.534259	1	-1.1518	0.000132497	1	2.94654	NA
ENSG00000023892	DEF6	10.4511	9.37297	10.5315	19.1911	21.2763	20.5178	24.4901	12.7547	11.8702	19.8263	20.9638	18.8621	DEF6	1.00854	5.27332e-05	0.483722	0.693366	0.00533255	1	-0.0319414	0.897649	1	0.283213	0.253539	1	0.40846	NA
ENSG00000023902	PLEKHO1	11.7067	11.6653	11.9234	22.7335	24.508	23.4807	20.366	7.30197	7.80647	25.3224	23.7547	24.284	PLEKHO1	1.0045	0.00262938	1	0.0046755	0.987534	1	0.0529201	0.873159	1	1.05274	0.00166593	1	225.162	NA
ENSG00000023909	GCLM	33.745	34.5696	35.5693	30.8522	30.6714	30.5774	39.8898	41.6506	42.096	33.3945	32.5222	32.4378	GCLM	-0.173914	0.0977015	1	0.251586	0.0166379	1	0.0948707	0.36501	1	-0.330631	0.00159314	1	-1.31419	NA
ENSG00000024048	UBR2	53.1783	53.2139	55.0909	85.3393	83.783	83.4293	31.7847	62.7209	62.4985	83.728	82.6042	82.5592	UBR2	0.645472	0.00393276	1	-0.0399069	0.857408	1	-0.0210688	0.9249	1	0.66431	0.00299225	1	-16.6465	NA
ENSG00000024422	EHD2	2.65531	2.7061	2.83279	1.79603	2.22708	1.71067	2.03415	1.39488	1.50942	1.80867	1.80776	1.8576	EHD2	-0.52178	0.00325333	1	-0.759265	4.85939e-05	0.621225	-0.0686443	0.712525	1	0.168974	0.39977	1	-0.222549	NA
ENSG00000024526	DEPDC1	30.7466	32.5447	30.9467	16.9168	17.3628	16.3557	13.286	19.8062	21.8951	19.3717	20.8651	20.3813	DEPDC1	-0.897296	2.3739e-07	0.00243681	-0.775826	7.70843e-06	0.0999398	0.259996	0.132861	1	0.138534	0.420746	1	-0.178563	NA
ENSG00000024862	CCDC28A	11.9503	12.4294	11.2016	13.4571	13.4766	13.8443	16.671	15.8681	14.5569	17.7738	18.2433	19.8935	CCDC28A	0.197511	0.0979317	1	0.404454	0.000717068	1	0.456208	9.24877e-05	1	0.249248	0.0341163	1	0.616258	NA
ENSG00000025039	RRAGD	1.00619	1.21608	1.13152	2.52657	2.45889	2.02106	0.603835	0.923663	0.753771	2.77292	2.6535	3.34898	RRAGD	1.08393	5.3936e-08	0.000565573	-0.553463	0.0158359	1	0.328127	0.0685042	1	1.96566	2.5556e-21	3.17329e-17	-3.55157	NA
ENSG00000025156	HSF2	19.2964	18.1603	18.9862	21.4103	20.99	22.1403	11.9033	21.0179	20.5517	23.6695	23.7265	24.1028	HSF2	0.193665	0.32056	1	-0.0758524	0.694983	1	0.147919	0.446381	1	0.417435	0.0317572	1	-5.50326	NA
ENSG00000025293	PHF20	57.1325	58.0278	55.5033	51.5691	52.1342	51.2328	85.7552	62.0646	62.1626	56.9221	56.062	57.4288	PHF20	-0.13953	0.33417	1	0.298553	0.0386617	1	0.137436	0.34087	1	-0.300649	0.0370608	1	-1.00702	NA
ENSG00000025423	HSD17B6	0.856269	0.642999	0.650352	0.886302	0.836223	1.20275	0.484643	0.553418	0.736979	0.913304	0.919737	0.923748	HSD17B6	0.461237	0.0618354	1	-0.268327	0.329661	1	-0.0869641	0.71986	1	0.642742	0.00942017	1	-2.39537	NA
ENSG00000025434	NR1H3	17.4412	17.3006	18.1098	14.0498	13.8584	14.3522	46.9699	20.7486	21.0051	12.8837	12.2668	11.3773	NR1H3	-0.323281	0.250896	1	0.747123	0.00803982	1	-0.210785	0.454464	1	-1.28119	6.81313e-06	0.0646702	-1.71484	NA
ENSG00000025708	TYMP	3.98585	4.11971	3.72638	4.63548	4.76334	4.95571	13.1668	3.76782	3.79315	4.45345	4.31679	4.43615	TYMP	0.280836	0.502223	1	0.809989	0.0537819	1	-0.121045	0.773709	1	-0.650243	0.119652	1	-0.80278	NA
ENSG00000025770	NCAPH2	67.3645	67.0252	68.7182	26.6757	28.1215	28.6304	133.051	56.107	55.3114	29.8406	27.7015	28.0194	NCAPH2	-1.28456	2.00096e-05	0.188071	0.267093	0.367521	1	0.0364821	0.902818	1	-1.51518	5.65814e-07	0.00570567	-5.67284	NA
ENSG00000025772	TOMM34	65.0782	65.6307	63.5801	148.731	147.83	143.858	68.3531	76.8912	73.8332	163.595	162.442	161.56	TOMM34	1.18108	2.21477e-28	2.81674e-24	0.173705	0.102581	1	0.14684	0.162126	1	1.15421	2.93408e-27	3.73097e-23	6.64468	NA
ENSG00000025796	SEC63	111.029	110.427	113.226	94.3952	91.9917	91.3585	104.039	137.595	144.965	109.914	110.824	111.801	SEC63	-0.269112	0.0502171	1	0.208462	0.129541	1	0.259837	0.0584764	1	-0.217739	0.113069	1	-1.0445	NA
ENSG00000025800	KPNA6	67.5332	69.2984	67.4638	88.6474	86.701	86.8154	110.738	64.5721	64.799	75.9865	75.7114	76.7749	KPNA6	0.359957	0.0685143	1	0.232554	0.238853	1	-0.198519	0.314346	1	-0.0711167	0.71787	1	-0.305807	NA
ENSG00000026036	RTEL1-TNFRSF6B	1.04367	1.13967	1.06278	1.3136	1.21803	1.20275	0.174741	1.00781	1.10641	1.50562	1.20165	1.25826	RTEL1-TNFRSF6B	0.207646	0.647427	1	-0.497577	0.276888	1	0.0888049	0.845861	1	0.794175	0.0740093	1	-1.59608	NA
ENSG00000026103	FAS	8.31478	8.13129	7.98814	5.49007	5.96329	5.52006	5.896	7.891	8.36061	6.31307	5.82503	5.98328	FAS	-0.527762	0.000509202	1	-0.136765	0.361138	1	0.0948825	0.5362	1	-0.296111	0.0540973	1	2.16511	NA
ENSG00000026297	RNASET2	183.403	182.654	181.586	129.296	134.904	137.368	387.17	180.156	171.866	139.296	138.902	134.967	RNASET2	-0.447681	0.0975472	1	0.432623	0.10921	1	0.0410868	0.879036	1	-0.839218	0.00199173	1	-1.93984	NA
ENSG00000026652	AGPAT4	0.106669	0.146326	0.152001	1.21711	0.972582	0.821807	0.0555481	0.149515	0.166047	0.582706	0.525058	0.644986	AGPAT4	3.20572	1.8192e-19	2.22743e-15	-0.0709352	0.86937	1	-0.813497	0.00155767	1	2.46335	9.86564e-11	1.10397e-06	-34.7267	NA
ENSG00000026950	BTN3A1	13.918	14.7409	13.8824	11.1965	11.0767	10.4864	10.0916	11.543	11.9373	8.4895	9.40533	8.56183	BTN3A1	-0.377635	0.0018036	1	-0.339589	0.00527545	1	-0.309383	0.0111626	1	-0.347411	0.00493868	1	1.02303	NA
ENSG00000027001	MIPEP	21.6577	21.6561	21.0999	9.69411	9.74042	8.99085	18.1252	17.0461	18.1168	7.37374	7.41784	7.71161	MIPEP	-1.18252	5.78166e-27	7.32363e-23	-0.274328	0.0115027	1	-0.338381	0.00273112	1	-1.24656	6.7634e-29	8.64701e-25	4.54405	NA
ENSG00000027075	PRKCH	0.800049	0.891335	0.787828	1.29981	1.10894	1.2874	0.436965	0.654394	0.703395	0.871979	1.07479	0.979501	PRKCH	0.595025	0.00457198	1	-0.452664	0.0539263	1	-0.346595	0.0802593	1	0.701369	0.00153479	1	-1.54943	NA
ENSG00000027697	IFNGR1	62.1173	61.6573	60.8477	50.8937	51.8478	52.9964	62.9179	87.3085	88.9965	61.5229	61.1928	62.3629	IFNGR1	-0.24558	0.0898554	1	0.37454	0.0097427	1	0.249154	0.0848994	1	-0.370968	0.010367	1	-0.990465	NA
ENSG00000027847	B4GALT7	16.7103	17.5299	17.8177	19.329	19.8582	20.7577	37.0053	19.0825	17.6802	21.4655	20.4141	20.0886	B4GALT7	0.203813	0.410353	1	0.501986	0.0425763	1	0.0479752	0.846707	1	-0.250206	0.309838	1	-0.498433	NA
ENSG00000027869	SH2D2A	1.19359	1.12057	1.23463	0.128196	0.168068	0.144581	2.48708	1.26025	1.19037	0.0730342	0.0599009	0.1014	SH2D2A	-3.29819	1.00335e-15	1.19489e-11	0.471958	0.151549	1	-1.28052	0.0402462	1	-5.046	4.85096e-27	6.16266e-23	-10.6916	NA
ENSG00000028116	VRK2	15.8295	16.1163	14.9307	18.5295	19.0673	18.1052	6.03903	19.0657	18.8893	22.8705	24.0225	23.1411	VRK2	0.249335	0.460516	1	-0.0900449	0.788839	1	0.330801	0.326387	1	0.670178	0.0473838	1	-7.44271	NA
ENSG00000028203	VEZT	29.0037	29.2972	30.1734	60.0737	59.3748	59.416	17.3385	33.8418	34.6403	64.209	65.041	65.1366	VEZT	1.01626	6.85067e-06	0.0660336	-0.0427126	0.847782	1	0.120119	0.590742	1	1.17909	1.93031e-07	0.00198204	-27.6051	NA
ENSG00000028310	BRD9	17.666	18.2367	18.402	19.3427	18.0719	18.6413	19.4602	16.3393	16.5552	18.5727	18.3984	19.2942	BRD9	0.0457933	0.698955	1	-0.0550885	0.651686	1	0.0054002	0.965535	1	0.106283	0.373302	1	-1.92931	NA
ENSG00000028528	SNX1	104.245	105.097	103.706	129.682	128.358	125.77	107.377	93.7878	95.2263	120.907	116.293	119.049	SNX1	0.294095	0.00653054	1	-0.079248	0.465818	1	-0.107534	0.318935	1	0.265809	0.0140969	1	-3.35414	NA
ENSG00000028839	TBPL1	16.8602	16.3837	17.1819	20.3076	19.8446	18.7824	16.0989	17.6352	17.5123	21.9614	21.1329	21.7194	TBPL1	0.225224	0.0392235	1	0.0244647	0.832192	1	0.137355	0.202837	1	0.338112	0.00189848	1	13.8204	NA
ENSG00000029153	ARNTL2	14.7613	14.7409	14.9822	16.5446	15.9856	15.3116	7.37399	10.7856	11.6351	13.6826	12.2245	13.4541	ARNTL2	0.105167	0.526911	1	-0.575463	0.000582787	1	-0.282072	0.0880455	1	0.398578	0.0167236	1	-0.692621	NA
ENSG00000029363	BCLAF1	142.062	140.724	139.914	170.289	164.303	160.04	79.1281	123.492	124.915	135.577	135.646	138.799	BCLAF1	0.226769	0.177288	1	-0.367653	0.0289075	1	-0.270707	0.107204	1	0.323717	0.0542248	1	-0.880495	NA
ENSG00000029364	SLC39A9	56.158	57.2446	55.7611	64.4845	62.0065	62.9855	27.0647	53.5658	53.0613	61.4265	60.8545	60.8297	SLC39A9	0.163686	0.463704	1	-0.338876	0.129447	1	-0.0493261	0.82531	1	0.453239	0.0426229	1	-1.33748	NA
ENSG00000029639	TFB1M	48.587	49.4697	48.2687	23.0368	23.0763	24.3413	57.9118	57.285	54.7573	26.1627	27.3209	26.9601	TFB1M	-1.05538	1.07767e-22	1.34267e-18	0.215947	0.0417904	1	0.191541	0.0746846	1	-1.07979	8.50828e-24	1.06787e-19	-5.00023	NA
ENSG00000029725	RABEP1	33.5201	33.8819	34.6242	47.1997	45.589	47.9031	25.0384	35.9118	39.1238	50.4616	49.8035	49.3308	RABEP1	0.463919	0.00408683	1	-0.0265805	0.867487	1	0.088595	0.581929	1	0.579094	0.000336734	1	-21.7864	NA
ENSG00000029993	HMGB3	55.2397	56.0602	55.7096	36.7103	36.6712	36.9688	35.9326	41.8526	39.7955	34.0833	33.664	33.4832	HMGB3	-0.598239	7.64471e-08	0.000798108	-0.505807	5.65707e-06	0.0734627	-0.124546	0.263527	1	-0.216972	0.052483	1	0.428962	NA
ENSG00000030066	NUP160	115.714	112.413	112.229	78.6128	73.8561	73.6942	45.1343	111.459	111.615	81.5654	81.8571	81.9181	NUP160	-0.589873	0.035593	1	-0.343459	0.219899	1	0.117467	0.674777	1	-0.128946	0.64557	1	0.375435	NA
ENSG00000030110	BAK1	13.8431	13.9576	13.2982	26.4	26.3625	26.4435	21.844	14.2861	14.8088	25.2398	25.122	24.4095	BAK1	0.948113	1.01068e-08	0.00010788	0.307462	0.0630937	1	-0.0832223	0.610175	1	0.557422	0.000729054	1	1.81298	NA
ENSG00000030419	IKZF2	0.949969	0.681204	1.0456	2.59549	3.2634	3.09334	0.293934	0.940492	0.837732	2.46987	2.51255	2.9169	IKZF2	1.77367	3.48259e-08	0.000366508	-0.353726	0.285259	1	-0.182485	0.546067	1	1.94504	2.17071e-09	2.36325e-05	-5.49872	NA
ENSG00000030582	GRN	235.8	232.589	237.092	440.67	439.637	460.235	351.15	240.573	239.84	404.89	403.055	391.372	GRN	0.926222	6.02545e-09	6.46833e-05	0.237064	0.1337	1	-0.160615	0.309056	1	0.528543	0.000847403	1	2.22954	NA
ENSG00000031003	FAM13B	10.3387	10.4427	10.9954	15.8003	16.1902	14.7614	4.75175	8.31173	8.88117	12.4842	13.1548	13.6214	FAM13B	0.558274	0.0061778	1	-0.530821	0.00983726	1	-0.252515	0.212561	1	0.836602	4.57165e-05	0.406054	-1.57605	NA
ENSG00000031081	ARHGAP31	0.181629	0.318251	0.152001	2.30603	2.60888	1.75299	0.0317095	0.401954	0.485097	1.89132	1.76548	1.70428	ARHGAP31	3.55345	9.4383e-08	0.000982432	0.603809	0.409126	1	-0.319601	0.581319	1	2.62905	2.48667e-05	0.226063	4.3541	NA
ENSG00000031691	CENPQ	17.4786	20.0705	18.2817	6.86845	7.1087	6.71932	20.223	18.2242	17.5627	9.63282	9.71544	9.95564	CENPQ	-1.43538	8.58625e-32	1.10179e-27	0.00330014	0.976637	1	0.503468	4.3195e-05	0.56728	-0.935224	8.3833e-15	9.94092e-11	-283.389	NA
ENSG00000031698	SARS	71.7684	70.5974	70.5226	72.9202	75.4924	75.1756	417.112	240.203	241.721	148.167	153.223	153.644	SARS	0.0707766	0.725031	1	2.07859	2.13395e-23	2.87209e-19	1.02543	4.17705e-07	0.00555715	-0.98239	1.19154e-06	0.0118237	-0.472624	CBP/p300 activity.dependent
ENSG00000031823	RANBP3	84.3054	83.7401	79.4757	55.1391	55.025	58.0192	123.063	73.5422	72.0532	49.2219	47.7738	48.2297	RANBP3	-0.557755	0.00448849	1	0.117758	0.546792	1	-0.211857	0.279692	1	-0.887369	6.77478e-06	0.0643266	-7.53554	NA
ENSG00000032219	ARID4A	34.0448	35.8876	33.8337	43.0646	45.3436	41.7517	35.4797	33.3874	34.5396	40.9983	40.8669	41.0376	ARID4A	0.327304	0.00241756	1	-0.00526787	0.964143	1	-0.0828498	0.440244	1	0.249722	0.0208834	1	-47.4048	NA
ENSG00000032389	EIPR1	56.7389	57.7794	56.7578	61.3142	60.4521	61.4618	93.7173	62.8219	61.7932	63.6167	63.4904	63.924	EIPR1	0.0973694	0.552431	1	0.349674	0.0328129	1	0.0601976	0.713104	1	-0.192109	0.239688	1	-0.549395	NA
ENSG00000032444	PNPLA6	29.416	29.259	30.5342	74.2847	76.4605	77.687	45.6349	29.9879	29.0317	70.4353	69.1992	66.0008	PNPLA6	1.35734	9.14121e-15	1.07821e-10	0.229157	0.185047	1	-0.151739	0.376708	1	0.976445	1.96558e-08	0.00020845	4.26102	NA
ENSG00000032742	IFT88	16.5416	15.9825	15.9618	13.7328	13.7357	13.2094	12.5946	14.3535	15.4637	15.2392	15.0718	16.2138	IFT88	-0.253753	0.0342565	1	-0.190997	0.11176	1	0.194128	0.103424	1	0.131373	0.270469	1	-0.687828	NA
ENSG00000033011	ALG1	31.5336	31.3794	32.0293	28.0403	26.5125	26.6834	28.7572	33.6735	31.7856	22.7603	23.2332	21.8309	ALG1	-0.225192	0.0455501	1	-0.01014	0.926998	1	-0.260644	0.020771	1	-0.475693	2.64076e-05	0.239517	46.9124	NA
ENSG00000033030	ZCCHC8	27.6545	27.4251	27.716	28.7432	28.6397	28.1507	25.8727	40.9774	43.2211	39.1387	38.4847	38.25	ZCCHC8	0.0469853	0.793558	1	0.412374	0.0213047	1	0.438381	0.0139036	1	0.0729851	0.679887	1	0.176988	NA
ENSG00000033050	ABCF2	7.05921	7.4818	7.07736	6.68926	7.34051	7.04382	29.7584	7.18417	8.10873	6.45082	6.98088	6.74988	ABCF2	-0.0369536	0.936163	1	1.06085	0.0192493	1	-0.0626803	0.890613	1	-1.16051	0.0105436	1	-1.09395	NA
ENSG00000033100	CHPF2	42.4965	42.2489	43.0961	115.291	114.873	114.102	22.6545	28.2713	28.4272	79.4578	78.3473	77.0119	CHPF2	1.42978	5.66324e-31	7.25517e-27	-0.686986	2.61905e-08	0.000346501	-0.552162	5.13394e-06	0.0679169	1.56461	3.73022e-36	4.83884e-32	-2.2775	NA
ENSG00000033170	FUT8	6.79685	7.73013	7.38668	25.6281	26.3216	26.4012	5.157	7.97515	8.20948	24.5235	24.0085	23.155	FUT8	1.84237	2.38809e-26	3.01759e-22	-0.0324309	0.844301	1	-0.128387	0.440342	1	1.74641	5.76344e-24	7.23716e-20	-53.8503	NA
ENSG00000033178	UBA6	58.3318	60.7404	60.59	67.1034	66.2473	65.0736	24.5854	61.6438	65.4203	75.835	78.6856	78.8796	UBA6	0.143369	0.622639	1	-0.244113	0.401825	1	0.234313	0.420915	1	0.621796	0.0332334	1	-2.54716	NA
ENSG00000033327	GAB2	16.729	16.8804	16.4773	26.1657	24.808	26.2319	9.61482	27.1942	29.2668	49.5663	50.7057	50.0834	GAB2	0.625188	0.0530323	1	0.401486	0.214473	1	0.96242	0.00295551	1	1.18611	0.000265993	1	2.95429	NA
ENSG00000033627	ATP6V0A1	39.4606	39.5554	39.5905	98.1582	97.3779	99.2736	33.8825	40.4894	38.4857	108.165	107.962	104.651	ATP6V0A1	1.31424	1.31184e-30	1.67915e-26	-0.0707907	0.532621	1	0.121831	0.275712	1	1.50687	2.28509e-39	2.9793e-35	-21.2862	NA
ENSG00000033800	PIAS1	33.6138	33.538	32.1839	36.1451	36.4666	36.6301	26.6832	32.8657	32.9443	38.0918	37.061	38.5984	PIAS1	0.137323	0.25912	1	-0.101634	0.403142	1	0.0584109	0.630092	1	0.297368	0.0143393	1	-2.92588	NA
ENSG00000033867	SLC4A7	24.0939	25.4384	24.9321	31.2795	29.9896	29.5475	14.1918	28.2545	28.5112	35.0888	33.9318	35.6714	SLC4A7	0.286721	0.208281	1	-0.0681528	0.763478	1	0.205314	0.366288	1	0.560187	0.0139362	1	-8.21957	NA
ENSG00000034053	APBA2	3.59231	3.83316	4.01852	4.42872	4.84516	4.61709	3.70285	3.43123	4.24654	3.32391	3.23143	3.16778	APBA2	0.280891	0.0409994	1	-0.00735937	0.973446	1	-0.518706	0.00014686	1	-0.230422	0.104791	1	31.31	NA
ENSG00000034152	MAP2K3	86.5168	86.9494	88.4633	36.5173	37.653	39.0992	66.7082	71.8929	74.0179	28.7662	27.3068	27.4898	MAP2K3	-1.2101	3.78467e-28	4.81107e-24	-0.300706	0.00556317	1	-0.439199	6.36537e-05	0.834245	-1.34859	4.57067e-34	5.91079e-30	4.48473	NA
ENSG00000034510	TMSB10	165.356	159.578	162.46	337.596	351.672	352.669	762.914	154.104	155.325	342.311	344.389	344.428	TMSB10	1.09625	0.0345888	1	1.13769	0.0284441	1	-0.0150459	0.97662	1	-0.0564909	0.912268	1	-0.049654	NA
ENSG00000034533	ASTE1	3.70475	4.32984	3.91541	4.85602	5.48604	4.98393	3.75053	4.82806	4.98539	5.1973	5.19073	4.47796	ASTE1	0.361838	0.0228631	1	0.191138	0.24783	1	-0.0443302	0.780562	1	0.126355	0.417343	1	0.661067	NA
ENSG00000034677	RNF19A	85.2237	85.8223	84.0125	50.5905	47.1299	48.3969	32.5714	60.5836	61.4238	58.4235	55.1881	56.8992	RNF19A	-0.804075	0.000164389	1	-0.722064	0.000704054	1	0.222867	0.293873	1	0.140859	0.506167	1	-0.195078	NA
ENSG00000034693	PEX3	15.6609	14.3588	14.6386	22.003	21.4945	20.0663	11.5219	14.8415	14.6073	20.2395	19.4696	20.5765	PEX3	0.510209	0.000108294	0.970528	-0.121596	0.358469	1	-0.0765272	0.55804	1	0.555281	2.5576e-05	0.232358	-4.56659	NA
ENSG00000034713	GABARAPL2	59.6811	58.5054	57.6686	120.419	121.909	122.158	97.9368	50.9572	51.1302	110.548	113.544	113.906	GABARAPL2	1.05186	5.36248e-06	0.0520322	0.185249	0.41839	1	-0.108876	0.633896	1	0.757734	0.000992695	1	4.09035	NA
ENSG00000035115	SH3YL1	17.5723	18.2558	17.4224	9.29439	8.56774	8.46882	12.6423	16.76	17.1261	8.31043	8.06624	7.86492	SH3YL1	-1.01841	1.04152e-12	1.19868e-08	-0.192195	0.17145	1	-0.11971	0.408272	1	-0.945917	4.72987e-11	5.32252e-07	4.92167	NA
ENSG00000035141	FAM136A	69.3509	67.3881	67.3778	57.3997	56.2522	57.9204	86.2559	58.665	58.4348	48.2439	46.3642	47.3237	FAM136A	-0.250697	0.115661	1	-0.0061323	0.971768	1	-0.273771	0.0859251	1	-0.518334	0.0011697	1	84.5253	NA
ENSG00000035403	VCL	73.0614	72.2976	70.5742	109.585	107.264	103.958	35.0029	48.0794	48.1916	98.5361	95.6427	94.1139	VCL	0.571331	4.66281e-05	0.429445	-0.717296	3.73025e-07	0.00489744	-0.154216	0.269597	1	1.13442	1.26342e-15	1.51067e-11	-1.58152	NA
ENSG00000035499	DEPDC1B	45.7385	45.7065	45.7082	14.8217	14.3221	14.4228	15.6221	34.0101	34.0862	15.6938	16.4109	16.3532	DEPDC1B	-1.65652	7.95194e-11	8.88232e-07	-0.711566	0.00431704	1	0.153809	0.538616	1	-0.791136	0.00159818	1	1.11182	NA
ENSG00000035681	NSMAF	21.8451	21.3886	20.825	31.3208	30.5487	31.4099	11.9272	21.1693	22.2309	32.0721	30.4643	32.619	NSMAF	0.54282	0.00805899	1	-0.209559	0.305617	1	0.0287626	0.88845	1	0.781144	0.000141565	1	-3.72757	NA
ENSG00000035687	ADSS	38.8422	39.0396	38.7484	27.5578	26.6761	27.8403	17.1478	40.7418	41.9281	27.7881	28.2372	28.1588	ADSS	-0.507407	0.0643584	1	-0.223842	0.412938	1	0.0366598	0.894097	1	-0.246904	0.368563	1	1.10303	NA
ENSG00000035862	TIMP2	40.0041	39.7846	39.9857	86.5936	91.5417	91.4008	27.3507	31.5867	32.3734	73.452	70.6792	70.1543	TIMP2	1.17075	4.10336e-24	5.14233e-20	-0.39065	0.000738285	1	-0.331063	0.00358241	1	1.23034	3.30015e-26	4.18129e-22	-3.14947	NA
ENSG00000035928	RFC1	130.949	131.917	132.92	86.7452	83.7284	81.5951	87.4716	125.191	127.266	88.3426	88.4821	88.1623	RFC1	-0.651089	1.50196e-05	0.1421	-0.219125	0.143459	1	0.0721262	0.630665	1	-0.359838	0.0165536	1	1.64216	NA
ENSG00000036054	TBC1D23	37.2681	37.7215	37.8892	44.5394	43.1073	41.3143	29.5677	39.0084	40.1985	42.8441	42.9108	44.4664	TBC1D23	0.192304	0.163235	1	-0.0522412	0.703396	1	0.014029	0.919488	1	0.258575	0.0602982	1	-4.94962	NA
ENSG00000036257	CUL3	60.6368	59.9763	56.7922	95.5531	96.6143	96.8327	8.13683	50.9236	52.7086	88.5355	90.6105	90.4343	CUL3	0.704304	0.157836	1	-0.666542	0.181195	1	-0.100387	0.83976	1	1.27046	0.0116963	1	-1.90605	NA
ENSG00000036549	AC118549.1	46.5069	45.4008	45.8285	49.2535	49.2843	47.3388	17.0286	45.8916	48.4099	48.7398	48.9578	50.0277	AC118549.1	0.082894	0.788123	1	-0.30656	0.319717	1	0.0181781	0.953233	1	0.407634	0.185935	1	-1.32971	NA
ENSG00000036672	USP2	6.89055	5.83896	6.21814	1.12063	1.31348	1.17453	6.06287	4.89538	4.83426	0.73423	0.947928	0.658924	USP2	-2.4215	4.65284e-39	6.05334e-35	-0.268865	0.112929	1	-0.645507	0.00250285	1	-2.79792	6.60023e-46	8.67336e-42	10.4064	NA
ENSG00000037042	TUBG2	14.3116	15.0465	14.3808	23.5192	23.4172	23.8193	34.0017	18.8301	20.1487	28.7111	28.2512	28.7442	TUBG2	0.695087	0.00075736	1	0.737967	0.000355781	1	0.276884	0.1757	1	0.233989	0.25532	1	0.317072	NA
ENSG00000037241	RPL26L1	15.2111	13.9194	15.8071	15.3592	14.9357	15.9747	30.9027	14.101	14.4562	13.3796	13.479	14.0813	RPL26L1	0.0421455	0.877133	1	0.402776	0.135298	1	-0.176915	0.512124	1	-0.53755	0.0463352	1	-1.33461	NA
ENSG00000037474	NSUN2	75.2915	77.1115	74.4751	60.1151	58.9248	59.4724	24.7046	69.3012	71.9524	54.8696	56.6963	54.8642	NSUN2	-0.346045	0.272881	1	-0.450825	0.153375	1	-0.10116	0.748521	1	0.00362354	0.990521	1	-0.00803757	NA
ENSG00000037637	FBXO42	29.1911	27.2532	28.369	38.2678	38.3211	37.9423	39.9613	37.7799	38.3514	45.0757	43.7847	45.6651	FBXO42	0.433738	4.76537e-05	0.438461	0.452933	2.33263e-05	0.300046	0.232309	0.0276516	1	0.213109	0.0444453	1	0.470508	NA
ENSG00000037749	MFAP3	14.6864	14.5116	13.0919	21.6584	20.7582	19.4173	2.2487	15.8176	16.891	19.9227	18.5957	20.4371	MFAP3	0.54907	0.295793	1	-0.274126	0.600894	1	-0.0688751	0.895697	1	0.754328	0.151543	1	-2.75175	NA
ENSG00000037757	MRI1	7.39653	8.39873	7.90222	7.99871	7.88595	7.14258	4.27498	5.56855	6.36235	5.94114	6.30428	5.62089	MRI1	-0.0413839	0.799149	1	-0.54413	0.000811952	1	-0.367869	0.0214007	1	0.134917	0.400946	1	-0.24795	NA
ENSG00000037897	METTL1	9.43918	9.88875	9.38009	2.98143	3.31794	3.07923	17.9106	9.22051	9.04909	2.85557	2.90723	2.70783	METTL1	-1.62321	2.47398e-10	2.73722e-06	0.331593	0.17943	1	-0.148461	0.569127	1	-2.10326	6.0764e-16	7.28621e-12	-6.34289	NA
ENSG00000038002	AGA	16.1106	15.1038	16.7694	30.4524	31.2987	30.7044	26.4449	23.9798	25.8412	38.9458	38.2169	41.1212	AGA	0.947201	4.12867e-17	4.97959e-13	0.668581	3.61786e-09	4.8056e-05	0.355728	0.0012005	1	0.634334	1.10014e-08	0.00011755	0.948777	Dox.only
ENSG00000038210	PI4K2B	22.1074	23.318	22.0966	14.8079	14.2675	14.8178	15.5268	23.1047	22.4156	14.578	15.6356	15.0849	PI4K2B	-0.622353	7.58165e-05	0.687201	-0.143381	0.357597	1	0.0455515	0.773841	1	-0.433419	0.00597816	1	3.02286	NA
ENSG00000038219	BOD1L1	60.6743	60.7786	61.2773	76.821	74.8106	70.7736	58.5316	63.798	65.0341	74.0305	73.6393	74.2939	BOD1L1	0.283604	0.00850584	1	0.0365361	0.737621	1	-0.00287915	0.97931	1	0.244188	0.0233641	1	6.68347	NA
ENSG00000038274	MAT2B	44.5017	47.3111	45.4848	59.0675	61.0793	59.1479	30.0445	46.4974	46.3612	64.5947	66.2391	65.3596	MAT2B	0.38526	0.0205496	1	-0.158784	0.339247	1	0.130002	0.433025	1	0.674047	5.25152e-05	0.463709	-4.24505	NA
ENSG00000038358	EDC4	56.8139	56.2703	58.8028	73.2096	71.688	70.8583	12.0464	48.8535	48.158	61.2612	56.9923	56.718	EDC4	0.328089	0.408766	1	-0.656244	0.0995431	1	-0.30242	0.446225	1	0.681919	0.0870217	1	-1.03912	NA
ENSG00000038382	TRIO	71.6559	78.0284	75.3515	78.0615	75.8878	70.5056	18.888	82.2429	81.3392	83.6316	82.1954	83.4791	TRIO	-0.00372936	0.993003	1	-0.302313	0.466223	1	0.15155	0.714825	1	0.450135	0.278401	1	-1.48897	NA
ENSG00000038427	VCAN	13.8056	13.9958	13.4356	3.02278	2.49979	2.68418	5.20468	16.2047	16.1354	2.93821	2.59712	2.69389	VCAN	-2.3417	1.26337e-10	1.40639e-06	-0.133762	0.696934	1	0.00404227	0.994408	1	-2.20388	1.2145e-09	1.33012e-05	16.4761	NA
ENSG00000038532	CLEC16A	32.8267	34.7415	34.2805	62.1275	61.802	61.9838	28.0897	40.1528	41.0213	59.0159	59.6846	58.7251	CLEC16A	0.868769	1.23807e-08	0.000131805	0.102737	0.503498	1	-0.0674502	0.655355	1	0.698581	4.33322e-06	0.0415903	6.79969	NA
ENSG00000039068	CDH1	36.9682	36.9574	35.1053	3.38116	4.09519	3.37551	15.8367	46.447	48.964	3.33769	3.54153	3.25141	CDH1	-3.33938	2.24141e-19	2.74259e-15	0.0297121	0.931167	1	-0.100159	0.775323	1	-3.46923	1.50903e-20	1.86576e-16	-116.762	NA
ENSG00000039123	MTREX	73.4737	71.6863	72.9628	63.8918	63.561	62.139	26.7548	73.1719	73.5477	66.2064	67.8883	67.6176	MTREX	-0.202333	0.507229	1	-0.330099	0.279336	1	0.0894419	0.769435	1	0.217209	0.476105	1	-0.658011	NA
ENSG00000039319	ZFYVE16	36.9682	37.5878	35.5693	79.3985	76.2014	75.0204	13.4767	38.1501	39.4093	73.6035	73.1742	74.9908	ZFYVE16	1.067	0.000849194	1	-0.274008	0.387026	1	-0.0564883	0.858352	1	1.28452	6.38318e-05	0.558592	-4.68788	NA
ENSG00000039523	RIPOR1	22.2199	23.9484	24.5025	31.5	32.0486	33.6814	39.1508	25.1074	24.8841	33.8078	32.4659	33.0511	RIPOR1	0.460727	0.00953005	1	0.333725	0.0603954	1	0.030793	0.862524	1	0.15779	0.376163	1	0.472813	NA
ENSG00000039560	RAI14	16.9914	14.5116	16.168	35.8419	35.3894	32.5245	8.89966	17.3491	18.8053	34.2486	33.7627	34.1243	RAI14	1.12343	2.29816e-06	0.0226483	-0.0793784	0.735013	1	-0.0227331	0.923284	1	1.18008	6.9844e-07	0.00700483	-14.8665	NA
ENSG00000039650	PNKP	20.0085	20.0323	19.7252	20.666	20.5536	20.8423	47.9949	16.9957	16.7735	18.9722	18.497	19.4196	PNKP	0.0544658	0.876221	1	0.451621	0.19403	1	-0.12575	0.717724	1	-0.52291	0.132695	1	-1.15785	NA
ENSG00000040199	PHLPP2	12.0628	13.2126	12.4389	35.8419	33.3577	33.0324	3.55982	13.6635	14.2043	33.1053	33.227	33.4971	PHLPP2	1.44083	0.000258187	1	-0.261769	0.499546	1	-0.0343409	0.929503	1	1.66826	2.5928e-05	0.235426	-6.37304	NA
ENSG00000040275	SPDL1	31.0839	31.0355	30.9982	17.9919	18.1537	17.4421	13.9296	23.963	25.1863	18.8758	19.3287	19.9911	SPDL1	-0.798162	5.74076e-05	0.524993	-0.560628	0.00456775	1	0.119185	0.547343	1	-0.118343	0.55401	1	0.21109	NA
ENSG00000040341	STAU2	26.6238	25.553	26.2725	38.3367	36.453	35.6002	15.7175	27.2952	27.2014	35.1577	34.2278	35.5878	STAU2	0.493246	0.0107503	1	-0.158451	0.411568	1	-0.0726484	0.706361	1	0.579051	0.00275026	1	-3.65444	NA
ENSG00000040487	PQLC2	17.6848	17.2242	17.8692	34.0776	34.3258	36.3762	64.0383	29.2642	29.6866	43.6431	40.5286	40.94	PQLC2	0.990533	0.000259283	1	1.22098	7.39126e-06	0.0958572	0.256068	0.339584	1	0.0256057	0.925697	1	0.0209715	NA
ENSG00000040531	CTNS	10.245	10.3281	9.91281	14.7803	14.3493	14.2817	25.7059	16.6591	16.7399	16.5754	15.9457	16.9804	CTNS	0.511287	0.00345343	1	0.954816	5.19201e-08	0.00068602	0.189774	0.272234	1	-0.253781	0.140344	1	-0.26579	CBP/p300 activity.dependent
ENSG00000040633	PHF23	19.5963	19.0772	21.1687	39.4257	39.6847	39.6494	35.6942	21.1525	20.3838	32.6645	32.4518	31.8524	PHF23	0.98979	1.06748e-06	0.0106919	0.366658	0.069298	1	-0.292701	0.144499	1	0.330427	0.101761	1	0.901187	NA
ENSG00000040933	INPP4A	17.6848	19.6121	20.2407	39.2189	40.0529	39.7623	9.82937	18.5944	19.3595	34.9649	35.581	35.2672	INPP4A	1.0499	2.18255e-06	0.0215265	-0.266204	0.226978	1	-0.169994	0.437475	1	1.14611	2.48678e-07	0.00253999	-4.3054	NA
ENSG00000041357	PSMA4	83.4996	84.4851	83.5657	98.1444	100.01	100.501	128.259	70.5129	71.7845	86.1249	89.9762	90.0719	PSMA4	0.247714	0.242289	1	0.10463	0.620879	1	-0.16617	0.432486	1	-0.0230857	0.912604	1	-0.220641	NA
ENSG00000041802	LSG1	21.4328	21.7898	21.5983	26.5103	25.2989	26.4153	26.0396	23.4245	22.3653	25.7357	24.967	25.19	LSG1	0.271494	0.0147254	1	0.146951	0.188713	1	-0.0436826	0.69347	1	0.0808585	0.472256	1	0.550241	NA
ENSG00000041880	PARP3	15.8295	16.3073	16.9069	22.513	22.2036	21.5054	30.998	20.8327	21.089	24.8403	26.6021	25.9845	PARP3	0.433852	0.00790726	1	0.571001	0.000483262	1	0.225786	0.163414	1	0.0886244	0.590207	1	0.155209	NA
ENSG00000041988	THAP3	8.9332	8.1504	8.813	10.8519	11.9631	11.4458	18.3636	8.581	10.2581	12.8561	13.5354	13.7607	THAP3	0.404951	0.0990952	1	0.521012	0.0338856	1	0.229466	0.346788	1	0.113383	0.648094	1	0.217621	NA
ENSG00000042088	TDP1	28.0293	27.6926	27.5098	12.8092	13.5448	13.5903	18.4351	23.6769	22.1973	13.2832	13.8314	14.1231	TDP1	-1.06081	5.54245e-17	6.67865e-13	-0.370623	0.00307853	1	0.0460654	0.719195	1	-0.644116	3.84197e-07	0.00390305	1.73793	NA
ENSG00000042286	AIFM2	145.735	144.716	147.561	62.9132	62.2111	63.1972	202.088	175.696	175.274	68.6032	65.9572	67.7848	AIFM2	-1.21817	7.13626e-28	9.06448e-24	0.336309	0.00215494	1	0.103678	0.347076	1	-1.45081	1.65318e-38	2.15227e-34	-4.31391	NA
ENSG00000042317	SPATA7	4.56679	4.11971	4.32784	7.25439	7.6405	7.52352	5.22852	5.78733	6.6814	8.62725	8.79922	9.13329	SPATA7	0.78865	7.24989e-09	7.76318e-05	0.450641	0.00131304	1	0.245443	0.057844	1	0.583412	1.00304e-05	0.0941051	1.29463	NA
ENSG00000042429	MED17	2.56161	2.40046	2.30007	3.25711	3.20886	3.33319	4.01275	2.40464	2.3994	2.89689	2.72398	2.87508	MED17	0.43733	0.0352265	1	0.269885	0.194999	1	-0.207826	0.306339	1	-0.0403978	0.830757	1	-0.149685	NA
ENSG00000042445	RETSAT	84.699	85.7459	84.4593	60.3494	60.3566	60.968	77.9839	136.905	132.908	74.4162	75.2321	73.5134	RETSAT	-0.488805	0.0109365	1	0.448785	0.0193969	1	0.296871	0.121635	1	-0.640722	0.000860651	1	-1.42768	NA
ENSG00000042493	CAPG	4.67923	4.80741	4.99804	4.1117	4.13609	4.12328	22.4877	6.10709	6.11046	4.88048	5.31759	4.91005	CAPG	-0.229126	0.602797	1	1.26363	0.00403207	1	0.290254	0.505905	1	-1.20258	0.00604689	1	-0.951681	NA
ENSG00000042753	AP2S1	50.6672	51.2081	52.7023	57.9786	57.3022	58.7811	172.718	43.0643	41.0045	51.7565	51.8615	50.9337	AP2S1	0.17136	0.70911	1	0.7323	0.112357	1	-0.171605	0.708633	1	-0.732547	0.112186	1	-1.00034	NA
ENSG00000043093	DCUN1D1	24.7498	25.8587	24.6056	36.7516	36.5621	34.9653	14.2633	27.8842	27.3693	37.2791	37.8081	37.6088	DCUN1D1	0.52623	0.0166908	1	-0.112147	0.608432	1	0.0577247	0.792393	1	0.696102	0.0015565	1	-6.20705	NA
ENSG00000043143	JADE2	17.7785	16.7467	16.9585	92.0796	87.8328	88.8894	16.8379	16.7096	16.1018	76.5926	75.218	76.4404	JADE2	2.38641	6.34536e-101	8.51928e-97	-0.0527953	0.639937	1	-0.236004	0.0250863	1	2.2032	8.62929e-87	1.15503e-82	-41.7311	NA
ENSG00000043355	ZIC2	1.88697	2.07571	2.54065	3.31224	3.97246	3.79878	1.1998	2.11854	2.06356	2.77292	3.42877	3.08415	ZIC2	0.775718	0.000494194	1	-0.263531	0.252138	1	-0.257761	0.236824	1	0.781542	0.000503274	1	-2.96566	NA
ENSG00000043514	TRIT1	17.5536	16.3837	16.4086	14.5184	14.9493	14.3381	11.4504	17.45	17.4452	16.1621	16.4673	16.5902	TRIT1	-0.201078	0.221607	1	-0.116752	0.474691	1	0.168414	0.304555	1	0.0840884	0.604198	1	-0.720232	NA
ENSG00000044090	CUL7	108.611	112.012	110.477	112.631	109.377	109.023	131.883	103.936	102.917	97.5581	97.6724	96.2464	CUL7	-0.000297396	0.998515	1	0.032463	0.795618	1	-0.18364	0.144171	1	-0.2164	0.085313	1	-6.66605	NA
ENSG00000044115	CTNNA1	318.293	324.053	325.541	408.389	411.656	403.574	174.84	301.512	305.464	396.777	396.219	400.529	CTNNA1	0.338271	0.08023	1	-0.307883	0.111305	1	-0.0359291	0.852463	1	0.610225	0.00164439	1	-1.982	NA
ENSG00000044446	PHKA2	121.111	117.915	115.649	69.5431	68.5245	67.0207	47.3513	86.9383	89.4666	59.1398	59.0362	59.0875	PHKA2	-0.790512	0.000178468	1	-0.664253	0.00160565	1	-0.21045	0.316235	1	-0.336705	0.109407	1	0.506893	NA
ENSG00000044459	CNTLN	8.42722	8.91451	7.64445	9.52871	9.74042	8.69456	8.01763	9.00173	8.44457	8.80633	8.26358	9.49568	CNTLN	0.16383	0.207074	1	0.0298986	0.832864	1	-0.0743234	0.562738	1	0.0596087	0.644931	1	1.9937	NA
ENSG00000044574	HSPA5	804.558	798.28	794.283	363.867	369.167	367.173	206.641	426.453	428.433	274.538	277.773	279.045	HSPA5	-1.12359	2.58306e-06	0.0254018	-1.17513	9.03686e-07	0.0118302	-0.404276	0.0873939	1	-0.352735	0.135806	1	0.300167	NA
ENSG00000046604	DSG2	176.937	181.489	172.014	263.232	258.976	252.383	110.69	186.686	187.029	261.3	262.972	268.048	DSG2	0.546327	0.00337222	1	-0.13073	0.481725	1	0.0326513	0.860543	1	0.709709	0.000143926	1	-5.4288	NA
ENSG00000046647	GEMIN8	10.4699	10.4045	10.8064	8.05385	7.24506	8.34184	18.4351	8.74929	8.10873	8.29665	7.41784	7.02864	GEMIN8	-0.423788	0.129602	1	0.153212	0.580958	1	-0.0560063	0.843135	1	-0.633008	0.0235119	1	-4.13159	NA
ENSG00000046651	OFD1	18.9029	18.5805	19.2956	30.8246	29.9896	31.0007	18.1729	20.2437	20.5349	31.163	30.8167	31.6851	OFD1	0.694117	2.03618e-10	2.25792e-06	0.0556	0.622043	1	0.0288234	0.789631	1	0.667339	9.20143e-10	1.01013e-05	12.0025	NA
ENSG00000046653	GPM6B	0.987449	1.15877	1.21744	1.29981	1.51801	1.59779	0.53232	1.39488	1.49263	1.61582	1.86415	1.48127	GPM6B	0.401049	0.206454	1	0.0451498	0.939667	1	0.171388	0.584911	1	0.527234	0.089144	1	11.6774	NA
ENSG00000047056	WDR37	17.8534	18.0265	17.8005	29.4049	30.1805	29.3217	8.04147	14.69	14.8928	25.102	24.6287	24.7718	WDR37	0.728866	0.000369361	1	-0.510593	0.0128834	1	-0.255293	0.208968	1	0.984178	1.74306e-06	0.0171291	-1.92752	NA
ENSG00000047188	YTHDC2	36.7808	35.6011	35.0194	36.793	36.1394	36.6019	11.1405	35.7435	37.0584	35.1164	34.8621	34.5703	YTHDC2	0.0283983	0.935175	1	-0.355022	0.305979	1	-0.0672609	0.846391	1	0.316164	0.361588	1	-0.890546	NA
ENSG00000047230	CTPS2	31.1776	30.6917	31.1701	34.6427	34.7894	34.4433	24.1564	34.4645	34.4388	31.4247	32.4659	31.1276	CTPS2	0.159077	0.283691	1	0.00181196	0.995926	1	-0.128702	0.384608	1	0.0285637	0.844447	1	15.764	NA
ENSG00000047249	ATP6V1H	30.5592	31.857	30.0531	48.7021	51.1797	49.836	39.1508	37.5947	38.1834	53.0789	52.4394	52.3972	ATP6V1H	0.695836	6.31125e-11	7.06481e-07	0.313829	0.00334035	1	0.0769484	0.464406	1	0.458952	1.47993e-05	0.137234	1.46243	NA
ENSG00000047315	POLR2B	99.9533	100.092	101.85	111.211	106.678	106.906	21.844	84.0268	88.7782	90.2023	88.5666	91.842	POLR2B	0.105511	0.788129	1	-0.633093	0.108	1	-0.263391	0.502319	1	0.475217	0.226798	1	-0.750627	NA
ENSG00000047346	FAM214A	8.82076	8.32232	9.0364	35.9797	36.1394	34.3445	6.84954	14.202	13.499	34.8409	32.3954	34.0546	FAM214A	2.02747	1.6183e-17	1.95863e-13	0.404419	0.0838876	1	-0.0719182	0.753058	1	1.55112	3.46413e-11	3.90858e-07	3.83541	NA
ENSG00000047365	ARAP2	1.02493	0.662102	0.873751	5.82088	5.55422	5.60472	0.293934	1.22659	0.972069	6.28552	6.14923	6.49899	ARAP2	2.77202	8.177e-14	9.54419e-10	-0.0148489	0.953476	1	0.157934	0.640628	1	2.94476	2.39187e-15	2.85183e-11	-198.316	NA
ENSG00000047410	TPR	169.46	171.231	169.987	191.226	185.874	174.968	78.0554	168.224	166.039	166.006	167.996	171.317	TPR	0.112454	0.644996	1	-0.308466	0.206521	1	-0.127676	0.60083	1	0.293244	0.229678	1	-0.950654	NA
ENSG00000047457	CP	475.521	484.88	474.651	170.923	165.843	161.113	74.861	410.532	414.663	104.018	103.268	105.822	CP	-1.52741	0.00138522	1	-0.673014	0.151545	1	-0.669284	0.153917	1	-1.52367	0.0014234	1	2.26396	NA
ENSG00000047578	KIAA0556	25.3869	24.808	24.2963	31.4173	32.0895	30.1824	18.3874	25.8984	26.5129	30.4192	31.1127	31.4482	KIAA0556	0.331222	0.0259993	1	-0.0714419	0.629233	1	-0.010991	0.941944	1	0.391674	0.00836568	1	-5.48241	NA
ENSG00000047579	DTNBP1	9.00816	8.09309	8.38339	15.4971	16.6538	16.3134	17.7199	10.752	10.7283	14.702	15.9316	16.0605	DTNBP1	0.929701	2.12776e-06	0.0209967	0.61961	0.00159649	1	-0.053796	0.781704	1	0.256276	0.190055	1	0.413608	NA
ENSG00000047621	C12orf4	7.47149	8.24591	8.29746	9.91465	10.054	9.34357	6.70651	9.99466	9.51927	11.396	11.858	11.6282	C12orf4	0.288451	0.0716228	1	0.131819	0.425456	1	0.251629	0.110414	1	0.408249	0.00985826	1	3.09703	NA
ENSG00000047634	SCML1	67.1021	67.1207	65.2985	20.0181	19.7355	18.8953	31.1172	48.6011	51.3317	19.6334	20.6396	20.005	SCML1	-1.76789	2.54246e-22	3.16232e-18	-0.605763	0.000627075	1	0.0395658	0.825566	1	-1.12256	4.00726e-10	4.43403e-06	1.85314	NA
ENSG00000047644	WWC3	11.688	12.4294	11.1157	19.3841	17.8674	17.8935	9.42411	18.1064	16.488	21.2726	21.2175	22.0539	WWC3	0.647755	0.00228795	1	0.324572	0.128992	1	0.227393	0.279758	1	0.550565	0.00905265	1	1.69628	NA
ENSG00000047849	MAP4	214.455	212.226	212.089	170.413	171.27	167.123	139.178	197.086	200.631	167.948	165.303	168.906	MAP4	-0.328228	0.0257795	1	-0.250424	0.0887527	1	-0.0189813	0.897504	1	-0.0967844	0.511384	1	0.386482	NA
ENSG00000047932	GOPC	64.8533	64.7138	63.9581	93.5131	91.2554	91.6971	33.5726	64.8919	65.5546	78.838	79.7568	82.6429	GOPC	0.514781	0.01937	1	-0.238087	0.278614	1	-0.196713	0.370242	1	0.556156	0.0115474	1	-2.33593	NA
ENSG00000048028	USP28	37.6241	38.0845	36.3254	37.2754	36.8757	35.7695	22.7976	39.345	39.5268	39.2075	40.2185	38.9051	USP28	-0.027469	0.887414	1	-0.138931	0.470542	1	0.106445	0.580958	1	0.217908	0.257641	1	-1.56846	NA
ENSG00000048140	TSPAN17	16.729	15.5432	16.2711	36.5448	36.0712	36.5596	21.844	18.4093	19.4266	36.0118	36.6946	35.9781	TSPAN17	1.17071	3.13363e-24	3.92863e-20	0.296682	0.0106157	1	-0.00651171	0.955005	1	0.867508	3.71021e-14	4.3621e-10	2.92403	NA
ENSG00000048162	NOP16	13.6744	12.6396	12.3186	4.51143	5.10424	5.01214	44.4191	13.4952	15.111	4.63253	5.17663	5.39788	NOP16	-1.40658	0.000332402	1	0.919057	0.01737	1	0.056352	0.886769	1	-2.2693	1.5674e-08	0.000166724	-2.46916	NA
ENSG00000048342	CC2D2A	4.97907	4.7883	4.86056	5.32467	5.19969	5.2661	3.24992	5.09733	4.86785	4.41213	4.20403	3.75318	CC2D2A	0.110964	0.531542	1	-0.138944	0.426321	1	-0.354518	0.0428396	1	-0.104582	0.574693	1	0.752697	NA
ENSG00000048392	RRM2B	37.8303	39.1924	37.9579	46.3589	46.3526	45.9702	16.3611	41.5833	41.7938	48.299	46.2514	49.0381	RRM2B	0.270583	0.347303	1	-0.20447	0.477082	1	0.0501955	0.861682	1	0.52525	0.0683269	1	-2.56884	NA
ENSG00000048405	ZNF800	14.1991	13.8048	12.8685	21.6722	23.4717	20.3767	10.1631	17.7698	17.6299	26.8652	24.5582	24.521	ZNF800	0.682141	0.000692689	1	0.159677	0.433187	1	0.213251	0.284231	1	0.735707	0.000241426	1	4.60746	NA
ENSG00000048471	SNX29	19.5588	18.8671	19.0722	20.5419	20.54	19.9958	10.7352	25.3598	24.7162	17.2779	17.1861	17.078	SNX29	0.0872694	0.743086	1	0.082498	0.759443	1	-0.245292	0.355189	1	-0.240519	0.366886	1	-2.91545	NA
ENSG00000048544	MRPS10	41.9718	40.9499	43.0274	41.2451	41.171	40.891	59.509	50.7553	52.2049	49.0291	50.5506	48.2994	MRPS10	-0.0306619	0.789376	1	0.366836	0.00131313	1	0.262329	0.0210378	1	-0.135173	0.233695	1	-0.368483	NA
ENSG00000048649	RSF1	51.4355	51.934	50.8292	94.0782	94.4462	89.228	67.042	60.5331	64.5975	99.762	99.3498	98.379	RSF1	0.849414	1.73075e-15	2.05562e-11	0.3175	0.0029171	1	0.0990677	0.347531	1	0.63098	2.89051e-09	3.13851e-05	1.98734	NA
ENSG00000048707	VPS13D	26.5301	27.769	27.6129	40.2802	38.4984	36.0799	10.9975	28.6247	30.1232	38.4362	38.6116	39.365	VPS13D	0.488165	0.104061	1	-0.231064	0.440761	1	0.0194026	0.948739	1	0.738634	0.0141174	1	-3.19667	NA
ENSG00000048828	FAM120A	124.878	130.714	129.861	93.2925	92.8508	92.981	68.8537	121.523	121.607	89.6099	85.2964	87.6885	FAM120A	-0.465773	0.0180093	1	-0.304769	0.121105	1	-0.0880969	0.654202	1	-0.2491	0.205802	1	0.81734	NA
ENSG00000048991	R3HDM1	63.1855	62.7271	64.3706	69.1434	69.3426	67.6556	42.226	72.7512	77.7121	81.896	82.5619	80.3988	R3HDM1	0.115535	0.563001	1	0.0187587	0.926992	1	0.2484	0.213093	1	0.345175	0.0836688	1	18.4008	NA
ENSG00000049089	COL9A2	32.4144	30.2714	31.2732	9.07385	8.84045	8.53936	54.2168	23.5423	23.3896	7.62168	7.07955	7.96249	COL9A2	-1.83206	8.21162e-10	8.99008e-06	0.105446	0.71445	1	-0.223903	0.444128	1	-2.1614	7.74649e-13	8.97121e-09	-20.4977	NA
ENSG00000049130	KITLG	1.39973	1.75096	1.80172	0.624411	0.563507	0.610173	0.508481	0.923663	0.888109	0.293433	0.412293	0.421976	KITLG	-1.51008	1.58075e-09	1.71764e-05	-1.09633	9.85115e-06	0.127474	-0.719846	0.011995	1	-1.13283	0.00010011	0.858745	1.0333	NA
ENSG00000049167	ERCC8	11.3319	10.5	10.2393	9.21168	9.41316	8.73689	14.1918	11.6776	12.9617	11.1205	11.3364	10.3459	ERCC8	-0.229496	0.0698146	1	0.274661	0.0293772	1	0.262353	0.0362979	1	-0.241818	0.0525781	1	-0.880423	NA
ENSG00000049192	ADAMTS6	4.39813	4.67369	4.60279	6.00007	6.37237	5.7458	2.74931	4.3905	4.71672	6.39572	6.68487	6.48505	ADAMTS6	0.40832	0.0289257	1	-0.197659	0.29148	1	0.111309	0.545797	1	0.717296	0.000120756	1	-3.62895	NA
ENSG00000049239	H6PD	87.0415	90.1014	88.7554	86.318	86.2374	81.9196	82.0364	98.7861	102.195	78.5349	74.471	73.5692	H6PD	-0.0633627	0.60009	1	0.0904925	0.455465	1	-0.1676	0.165078	1	-0.321455	0.00787886	1	-3.55228	NA
ENSG00000049245	VAMP3	94.3688	93.4444	91.6596	109.599	108.191	108.219	106.686	81.4014	82.4139	96.7178	98.7437	96.9294	VAMP3	0.222278	0.0869139	1	-0.0476419	0.716096	1	-0.157058	0.225828	1	0.112863	0.386268	1	-2.36899	NA
ENSG00000049246	PER3	3.76097	3.81406	3.86386	1.87873	1.54529	1.75299	1.00909	3.0105	2.88637	1.91887	1.82186	1.94123	PER3	-1.15765	0.000399784	1	-0.724686	0.0245078	1	0.136641	0.686549	1	-0.296258	0.378276	1	0.408809	NA
ENSG00000049283	EPN3	1.79327	1.73186	1.76735	0.266033	0.345334	0.412649	3.55982	1.04147	1.30791	0.183233	0.271336	0.505605	EPN3	-2.47725	3.70931e-06	0.0362362	0.153165	0.749552	1	-0.101992	0.86826	1	-2.73225	4.32599e-07	0.00438353	-17.8386	NA
ENSG00000049449	RCN1	15.7546	16.9759	16.1508	10.4384	10.4222	10.0631	45.182	22.0949	21.7439	16.1621	16.4532	15.963	RCN1	-0.662069	0.00953128	1	0.864755	0.000694368	1	0.653112	0.0104284	1	-0.873738	0.000601137	1	-1.01039	NA
ENSG00000049541	RFC2	28.4228	28.4758	28.6268	10.8382	10.2177	10.2748	56.3623	31.553	29.2836	10.5695	11.2519	11.5864	RFC2	-1.45139	2.54691e-10	2.81739e-06	0.453871	0.0432593	1	0.0928559	0.683749	1	-1.81241	4.72311e-15	5.6153e-11	-3.99322	NA
ENSG00000049618	ARID1B	103.626	110.943	105.579	131.846	133.063	126.518	56.7914	118.981	116.603	136.486	135.745	133.935	ARID1B	0.29008	0.219436	1	-0.13059	0.579909	1	0.0533393	0.821257	1	0.474009	0.0449776	1	-3.62976	NA
ENSG00000049656	CLPTM1L	91.5203	89.5856	92.4157	64.1123	65.8791	66.4422	76.8396	93.9225	93.5303	66.413	64.2798	65.8196	CLPTM1L	-0.477815	5.56883e-05	0.50977	-0.0490659	0.67745	1	0.000584748	0.996766	1	-0.428164	0.000306519	1	8.72631	NA
ENSG00000049759	NEDD4L	297.81	295.113	291.516	86.4834	89.0873	88.5931	478.114	343.148	342.138	99.0457	97.9403	97.8772	NEDD4L	-1.74367	2.40837e-31	3.08705e-27	0.395417	0.0066168	1	0.158665	0.276975	1	-1.98042	2.11856e-39	2.7626e-35	-5.00844	NA
ENSG00000049769	PPP1R3F	0.762569	1.13967	0.890936	1.85116	2.03618	1.71067	1.48586	1.51269	1.25754	2.00152	1.82186	1.8576	PPP1R3F	1.02964	7.45379e-08	0.000778846	0.621921	0.00250333	1	0.0212384	0.914205	1	0.428762	0.0188351	1	0.689416	NA
ENSG00000049860	HEXB	90.246	92.5274	91.0409	76.4626	75.3696	75.4719	74.7657	81.5192	80.5836	72.9561	74.6119	73.1649	HEXB	-0.268664	0.00973201	1	-0.208889	0.0446544	1	-0.0423422	0.683942	1	-0.102117	0.327249	1	0.488857	NA
ENSG00000049883	PTCD2	9.28926	8.99092	8.93329	8.31574	8.64955	8.08788	7.66006	11.6103	11.7862	9.01295	8.92608	9.00785	PTCD2	-0.119639	0.478324	1	0.195367	0.252089	1	0.105449	0.529862	1	-0.209565	0.215782	1	-1.07268	NA
ENSG00000050130	JKAMP	26.9986	25.9542	24.2275	40.1011	38.7029	39.6777	14.5971	23.8115	23.3224	38.1331	35.2004	37.1628	JKAMP	0.619016	0.000522469	1	-0.320519	0.0726804	1	-0.100734	0.57024	1	0.838805	2.79876e-06	0.0271956	-2.61702	NA
ENSG00000050327	ARHGEF5	1.51217	1.65545	1.87045	3.13305	2.55434	2.62774	3.39295	1.54635	1.64375	3.19994	3.11866	3.04234	ARHGEF5	0.7322	0.00992283	1	0.376239	0.188102	1	0.172671	0.536617	1	0.528548	0.0643045	1	1.40482	NA
ENSG00000050344	NFE2L3	27.1672	28.1892	28.094	12.189	12.4403	13.2517	9.94856	18.6618	20.0311	8.09003	8.29177	7.82311	NFE2L3	-1.14133	4.18713e-07	0.00426041	-0.777601	0.00051611	1	-0.648103	0.00407072	1	-1.0118	8.20704e-06	0.0774663	1.30118	NA
ENSG00000050393	MCUR1	30.2593	30.7108	31.7372	25.4627	25.4216	26.0767	33.8587	34.0438	31.6681	27.2647	26.7853	27.2528	MCUR1	-0.268941	0.0105838	1	0.102786	0.328905	1	0.0792897	0.450741	1	-0.292439	0.00535528	1	-2.84513	NA
ENSG00000050405	LIMA1	18.172	18.4468	19.519	31.5	32.1714	30.5633	8.70895	12.721	12.9281	21.4517	21.9646	21.5243	LIMA1	0.748117	1.16059e-06	0.0116059	-0.705952	5.98315e-06	0.0776792	-0.537777	0.000434142	1	0.916312	3.86539e-09	4.1839e-05	-1.29798	NA
ENSG00000050426	LETMD1	45.9259	46.5852	44.6427	35.0976	35.4167	34.6972	57.5542	55.5853	56.1846	42.8992	43.7283	45.01	LETMD1	-0.382723	0.000273132	1	0.304077	0.00375799	1	0.323514	0.00203318	1	-0.36329	0.000519122	1	-1.19473	NA
ENSG00000050748	MAPK9	55.7457	54.7421	56.5172	41.6862	40.6528	40.8346	42.3214	61.7953	61.1047	45.2823	45.1661	45.5954	MAPK9	-0.439488	0.00402519	1	-0.0146687	0.921985	1	0.143477	0.347189	1	-0.281343	0.0656865	1	19.1798	NA
ENSG00000050820	BCAR1	121.748	124.792	125.341	126.098	130.69	133.276	142.563	121.321	120.331	125.438	124.835	119.244	BCAR1	0.068876	0.546332	1	0.0467545	0.681687	1	-0.0780829	0.493548	1	-0.0559614	0.623215	1	-1.19692	NA
ENSG00000051009	FAM160A2	14.8925	13.5183	14.5526	23.0092	22.9808	24.2425	13.9296	14.0842	13.8013	24	23.2332	22.8344	FAM160A2	0.709985	5.91439e-11	6.62352e-07	-0.0393274	0.727339	1	-0.00334527	0.9768	1	0.745967	7.01925e-12	8.00826e-08	-18.9681	NA
ENSG00000051108	HERPUD1	75.8724	76.3474	76.2107	56.7105	57.384	57.991	123.706	171.825	168.759	106.856	109.034	107.062	HERPUD1	-0.408817	0.00354282	1	1.02387	3.82985e-13	5.12778e-09	0.908548	1.07322e-10	1.43801e-06	-0.524144	0.000176973	1	-0.511924	CBP/p300 activity.dependent
ENSG00000051128	HOMER3	5.01655	4.44445	4.67153	7.0752	7.2587	8.22897	9.13805	4.34001	4.59917	7.38751	6.82582	7.23771	HOMER3	0.678287	0.00931536	1	0.351107	0.179395	1	-0.073135	0.778295	1	0.254024	0.334275	1	0.723495	NA
ENSG00000051341	POLQ	23.2693	25.1519	22.8184	6.22061	5.79966	5.75991	6.5158	19.3854	19.7961	7.33241	7.58699	7.11227	POLQ	-2.00783	4.47937e-09	4.8207e-05	-0.639923	0.0529923	1	0.310712	0.351466	1	-1.05719	0.00158134	1	1.65206	NA
ENSG00000051382	PIK3CB	55.2397	57.7221	55.4862	91.6936	89.81	89.609	16.9571	50.8899	51.2477	92.668	90.977	92.6783	PIK3CB	0.686881	0.0363508	1	-0.499868	0.127068	1	0.027474	0.933107	1	1.21423	0.000247043	1	-2.4291	NA
ENSG00000051523	CYBA	199.2	201.814	201.52	189.848	203.478	204.385	941.06	168.375	162.361	149.985	149.502	144.974	CYBA	-0.0115998	0.983422	1	1.07782	0.0554798	1	-0.427463	0.443298	1	-1.51688	0.0076502	1	-1.40736	NA
ENSG00000051596	THOC3	28.2167	28.4185	30.0874	12.2028	12.304	12.2077	18.149	20.1932	22.0798	11.4649	10.9981	10.9174	THOC3	-1.2422	1.41696e-25	1.78608e-21	-0.520456	9.19259e-06	0.119035	-0.137676	0.251889	1	-0.859409	6.84184e-13	7.93106e-09	1.65126	NA
ENSG00000051620	HEBP2	53.7967	51.571	51.9118	68.785	74.0606	70.5338	65.8024	46.9013	46.4284	66.4819	66.1827	63.1992	HEBP2	0.440314	0.00349329	1	0.0159733	0.914171	1	-0.123628	0.410713	1	0.300713	0.0463868	1	18.826	NA
ENSG00000051825	MPHOSPH9	29.1724	30.0804	29.5547	27.3924	26.008	25.851	18.0298	31.9233	32.4909	30.9702	29.689	30.9604	MPHOSPH9	-0.164413	0.412908	1	-0.105918	0.596126	1	0.209441	0.296125	1	0.150946	0.44992	1	-1.42511	NA
ENSG00000052126	PLEKHA5	17.4037	17.9119	16.5976	31.0865	29.3351	29.4769	10.5207	19.4527	20.7364	35.0613	35.2991	33.6504	PLEKHA5	0.793309	0.000277768	1	-0.0316292	0.882208	1	0.210559	0.330106	1	1.03549	2.18882e-06	0.0213935	-32.7386	NA
ENSG00000052344	PRSS8	5.27891	6.43114	5.90882	6.01385	6.33146	6.33838	15.1692	11.0717	11.2656	8.47573	8.41864	8.71515	PRSS8	0.0851704	0.600218	1	1.09064	6.68065e-12	8.92601e-08	0.456803	0.00362204	1	-0.548726	0.000404952	1	-0.503122	CBP/p300 activity.dependent
ENSG00000052723	SIKE1	39.3295	40.9499	39.178	42.1962	42.1937	41.0462	23.5366	42.9969	44.8835	45.0757	46.2796	45.5257	SIKE1	0.0705235	0.739603	1	-0.0995592	0.637273	1	0.126052	0.551313	1	0.296135	0.161374	1	-2.97446	NA
ENSG00000052749	RRP12	46.0196	47.9797	45.2786	22.7473	21.999	22.352	57.8641	60.0619	57.2761	25.3913	23.8816	24.0471	RRP12	-1.05456	1.9846e-22	2.46963e-18	0.331369	0.0018884	1	0.128123	0.236605	1	-1.2578	3.26868e-31	4.20123e-27	-3.79578	NA
ENSG00000052795	FNIP2	35.4315	36.5945	37.2878	24.2911	23.3217	22.5777	17.5769	35.5752	33.7503	25.1158	26.5598	26.2493	FNIP2	-0.639791	0.00470889	1	-0.330069	0.143178	1	0.150981	0.503972	1	-0.158738	0.484262	1	0.480924	NA
ENSG00000052802	MSMO1	112.865	117.858	116.44	25.0079	23.799	24.2143	33.4057	43.2662	42.4151	30.7635	29.8582	31.6155	MSMO1	-2.25062	1.00117e-62	1.32926e-58	-1.5432	1.02064e-31	1.37521e-27	0.337413	0.00968687	1	-0.370007	0.00454161	1	0.239767	NA
ENSG00000052841	TTC17	54.7712	55.7737	52.0321	72.4791	73.3925	68.4315	53.454	89.8161	92.2373	94.9408	92.6685	93.9188	TTC17	0.398751	0.0359122	1	0.535448	0.00493042	1	0.393767	0.0379096	1	0.257066	0.174748	1	0.480095	NA
ENSG00000053108	FSTL4	3.46113	3.54662	4.60279	0.555492	0.358969	0.469085	7.18328	4.69343	4.71672	0.376082	0.496867	0.533481	FSTL4	-3.15565	1.49434e-28	1.90154e-24	0.513106	0.0341512	1	0.0252532	1	1	-3.64348	4.21881e-37	5.47981e-33	-7.10083	NA
ENSG00000053254	FOXN3	126.077	129.549	125.943	67.0069	64.1474	61.8004	117.198	157.79	161.236	67.942	67.5359	68.1612	FOXN3	-0.983996	2.25461e-12	2.58356e-08	0.193502	0.163803	1	0.0777816	0.576609	1	-1.09972	4.94094e-15	5.8733e-11	-5.68323	NA
ENSG00000053371	AKR7A2	70.9438	69.585	69.0963	66.1385	66.0427	71.084	157.056	63.0911	63.8586	57.0874	56.062	57.3452	AKR7A2	-0.0444671	0.884559	1	0.43792	0.152527	1	-0.253758	0.406708	1	-0.736146	0.0165364	1	-1.68101	NA
ENSG00000053372	MRTO4	54.6026	53.7106	54.9191	20.8865	20.84	20.9128	114.743	47.5914	49.7364	18.4763	18.3561	18.667	MRTO4	-1.38306	3.34798e-06	0.0327667	0.377309	0.19664	1	-0.174864	0.551271	1	-1.93523	1.52608e-10	1.70097e-06	-5.12903	NA
ENSG00000053501	USE1	8.31478	7.94026	8.38339	9.94222	11.2676	11.2059	34.3116	7.92466	7.75609	10.7073	11.0686	10.332	USE1	0.397026	0.411245	1	1.02209	0.0355243	1	-0.013809	0.97812	1	-0.638905	0.185595	1	-0.625095	NA
ENSG00000053747	LAMA3	3.59231	3.24098	3.22803	1.79603	1.70892	1.62601	1.48586	3.39757	3.27259	1.7949	1.70909	1.71822	LAMA3	-0.983753	0.000272921	1	-0.294891	0.262772	1	0.0258383	0.942067	1	-0.662987	0.0152256	1	2.24824	NA
ENSG00000053770	AP5M1	24.4499	23.127	22.973	33.9949	33.6986	31.17	15.05	28.8267	28.2761	31.6176	29.8441	29.9289	AP5M1	0.487342	0.0246902	1	0.0340184	0.879724	1	-0.113504	0.599735	1	0.33982	0.11611	1	9.98931	NA
ENSG00000053900	ANAPC4	13.6932	13.3846	13.5559	14.1463	14.3221	13.7879	5.46691	12.1825	12.3068	13.3245	12.3372	13.4402	ANAPC4	0.0566121	0.825473	1	-0.437701	0.086012	1	-0.112169	0.659748	1	0.382158	0.132921	1	-0.873102	NA
ENSG00000054116	TRAPPC3	30.6529	29.5264	28.6439	35.7592	35.2667	35.5861	73.383	28.103	28.125	32.8849	33.3821	31.936	TRAPPC3	0.263613	0.413645	1	0.544904	0.0915025	1	-0.118635	0.712811	1	-0.39993	0.214552	1	-0.733946	NA
ENSG00000054118	THRAP3	156.248	157.744	155.139	148.083	144.326	140.514	80.2724	128.103	133.025	115.631	115.137	114.394	THRAP3	-0.115903	0.510652	1	-0.458236	0.00943666	1	-0.326915	0.0637209	1	0.0154195	0.929671	1	-0.0336498	NA
ENSG00000054148	PHPT1	89.8337	87.1022	92.8969	46.8964	48.3025	51.7125	242.565	57.3019	58.3172	36.0393	35.2568	35.2115	PHPT1	-0.877521	0.0614584	1	0.408562	0.380991	1	-0.464325	0.320039	1	-1.75041	0.000258873	1	-4.28431	NA
ENSG00000054179	ENTPD2	51.473	52.9655	52.7538	8.90844	9.8086	10.2042	70.3555	43.2157	41.7266	7.92473	8.41864	7.99037	ENTPD2	-2.446	1.86373e-32	2.39657e-28	-0.0183618	0.927451	1	-0.250012	0.211521	1	-2.67764	7.36821e-38	9.58089e-34	145.827	NA
ENSG00000054267	ARID4B	40.5476	42.3826	41.1715	64.705	63.6019	63.1125	42.5359	41.4655	41.5083	57.9827	56.2594	55.7005	ARID4B	0.625608	2.04078e-09	2.212e-05	0.0161426	0.87869	1	-0.171773	0.0968897	1	0.437692	2.75271e-05	0.249313	27.1141	NA
ENSG00000054277	OPN3	3.03011	2.80161	3.039	3.58792	3.35885	2.90992	0.556158	3.22928	3.49089	3.69583	3.24552	3.43261	OPN3	0.153491	0.751229	1	-0.282489	0.555724	1	0.0744358	0.879733	1	0.510442	0.286172	1	-1.80694	NA
ENSG00000054282	SDCCAG8	9.45792	8.95271	9.17387	10.6314	10.7904	11.3047	11.5219	14.2525	14.9935	14.3989	14.8463	15.043	SDCCAG8	0.247263	0.0623086	1	0.568071	1.98093e-05	0.255065	0.437538	0.000742689	1	0.116704	0.364367	1	0.205439	NA
ENSG00000054392	HHAT	5.16647	5.09395	5.89163	10.0525	9.49497	9.78094	2.32021	6.03977	5.47236	8.47573	8.82741	8.074	HHAT	0.863913	0.0022684	1	-0.219051	0.439504	1	-0.209463	0.45451	1	0.873518	0.00203614	1	-3.98773	NA
ENSG00000054523	KIF1B	131.549	135.7	134.758	182.087	174.925	168.844	46.1594	148.079	156.585	194.285	185.488	187.541	KIF1B	0.387524	0.268526	1	-0.196322	0.574636	1	0.109498	0.754234	1	0.693345	0.0484186	1	-3.53167	NA
ENSG00000054598	FOXC1	2.31799	2.83982	2.3688	17.6749	17.6901	18.2039	2.08183	2.55611	2.38261	16.7131	15.6638	15.9211	FOXC1	2.8476	1.26828e-87	1.69835e-83	-0.0918838	0.555404	1	-0.149649	0.229979	1	2.78984	4.62617e-83	6.1875e-79	-30.3627	NA
ENSG00000054611	TBC1D22A	55.2022	53.1757	55.3143	51.7208	49.707	50.612	70.1648	50.8057	52.5071	50.0071	49.9868	48.4109	TBC1D22A	-0.106617	0.452303	1	0.0829289	0.557436	1	-0.0349314	0.805762	1	-0.224478	0.112835	1	-2.70687	NA
ENSG00000054654	SYNE2	30.1656	31.494	30.6545	27.4338	26.5398	24.6094	7.70773	25.7806	25.0856	25.3913	26.4188	26.8068	SYNE2	-0.232573	0.505872	1	-0.655891	0.0614121	1	0.000619066	0.99916	1	0.423946	0.225321	1	-0.646367	NA
ENSG00000054690	PLEKHH1	15.7546	15.7151	15.6009	22.5681	21.7809	21.576	4.15578	14.4881	15.3629	20.7905	20.9074	21.5243	PLEKHH1	0.486787	0.185196	1	-0.468084	0.202788	1	-0.0604797	0.869349	1	0.894403	0.0153763	1	-1.91077	NA
ENSG00000054793	ATP9A	78.3461	77.6655	76.3138	77.2482	74.9197	74.2021	22.8214	62.5358	63.2037	68.8511	69.2979	68.6769	ATP9A	-0.037476	0.902648	1	-0.644851	0.0356731	1	-0.130321	0.67005	1	0.477058	0.119415	1	-0.739796	NA
ENSG00000054965	FAM168A	48.0998	50.4058	47.5297	78.2545	77.7832	76.657	17.0525	38.2847	41.1557	75.3116	72.272	72.4262	FAM168A	0.67246	0.0114665	1	-0.597286	0.0247571	1	-0.0809019	0.760013	1	1.18885	9.4856e-06	0.0891077	-1.99042	NA
ENSG00000054967	RELT	4.17325	5.15126	5.97755	10.6728	10.7904	10.5851	3.89356	4.89538	4.63276	17.1401	17.1157	16.0745	RELT	1.06959	7.00565e-12	7.96613e-08	-0.186714	0.250708	1	0.652641	1.33032e-05	0.175616	1.90894	2.90501e-33	3.75182e-29	-10.2239	NA
ENSG00000055044	NOP58	101.115	98.1436	97.846	56.1729	57.7113	54.7459	162.277	103.7	103.203	57.0323	55.907	57.9167	NOP58	-0.817432	3.28746e-06	0.0321842	0.313039	0.072892	1	0.0189244	0.914276	1	-1.11155	3.05705e-10	3.39027e-06	-3.55083	NA
ENSG00000055070	SZRD1	66.4462	65.134	68.8901	81.3972	82.6921	83.5139	121.871	55.1309	56.5876	73.0525	73.6534	71.1997	SZRD1	0.304755	0.254625	1	0.220188	0.410096	1	-0.184398	0.490276	1	-0.0998314	0.708381	1	-0.453392	NA
ENSG00000055130	CUL1	75.6476	76.9013	74.3548	92.5069	89.7145	91.9652	42.822	78.2544	80.2981	93.8802	95.3326	97.2082	CUL1	0.273182	0.189404	1	-0.171679	0.409086	1	0.0629996	0.762003	1	0.507861	0.0148099	1	-2.95819	NA
ENSG00000055147	FAM114A2	9.4017	9.10554	9.92999	16.8203	16.2856	16.2005	5.22852	9.67491	10.5268	15.7764	17.313	16.7296	FAM114A2	0.79579	0.000320655	1	-0.15763	0.474464	1	0.0149324	0.946896	1	0.968355	1.22345e-05	0.114099	-6.14323	NA
ENSG00000055163	CYFIP2	69.8757	70.2154	68.9588	67.1585	63.8746	64.862	82.5847	73.3402	70.4747	56.7292	54.8075	56.5089	CYFIP2	-0.0937926	0.401686	1	0.114617	0.305131	1	-0.221333	0.0476756	1	-0.429742	0.000123827	1	-3.74936	NA
ENSG00000055208	TAB2	75.9287	75.8507	75.4718	107.407	104.85	103.577	40.5811	87.2749	90.004	121.843	122.932	122.826	TAB2	0.47504	0.0557846	1	-0.0604444	0.806999	1	0.219033	0.376693	1	0.754517	0.00244944	1	-12.4828	NA
ENSG00000055211	GINM1	26.1553	25.0946	26.5302	44.2637	45.0845	44.8979	31.5702	29.685	30.6102	44.8002	45.7581	43.8113	GINM1	0.787998	1.39018e-13	1.61747e-09	0.239852	0.0252551	1	0.00132143	0.991057	1	0.549464	2.25032e-07	0.00230433	2.29085	NA
ENSG00000055332	EIF2AK2	62.0423	61.8101	62.0506	52.9751	50.4706	49.7091	44.1569	59.2541	58.6195	47.9822	47.1958	45.4142	EIF2AK2	-0.279706	0.040233	1	-0.197541	0.14706	1	-0.123552	0.364926	1	-0.205715	0.132706	1	1.04138	NA
ENSG00000055483	USP36	81.457	81.0657	78.2556	40.3905	40.1347	40.5242	111.572	91.2802	91.6832	47.9133	47.1535	46.6825	USP36	-0.992617	2.07768e-16	2.49114e-12	0.290401	0.0150205	1	0.227909	0.0577697	1	-1.05511	2.288e-18	2.79503e-14	-3.63329	NA
ENSG00000055609	KMT2C	35.0567	34.7415	34.6585	65.091	59.6203	56.5801	11.9987	35.4238	36.2691	66.2201	66.5351	66.5025	KMT2C	0.79593	0.0154682	1	-0.319153	0.329359	1	0.136388	0.676283	1	1.25147	0.000159865	1	-3.92124	NA
ENSG00000055917	PUM2	175.925	176.828	175.709	166.429	159.53	156.4	65.1826	182.596	190.656	169.849	171.351	171.735	PUM2	-0.131715	0.676471	1	-0.269308	0.39364	1	0.0886817	0.778739	1	0.226276	0.473385	1	-0.84021	NA
ENSG00000055950	MRPL43	35.6189	34.8179	35.6724	41.0797	41.5937	42.3442	70.0933	27.9852	26.9327	31.0941	31.4087	31.6015	MRPL43	0.23676	0.452601	1	0.235905	0.453838	1	-0.410139	0.193394	1	-0.409283	0.194237	1	-1.73495	NA
ENSG00000055957	ITIH1	30.6716	30.8063	30.3624	14.7114	14.2266	14.0983	50.9748	27.0764	27.7052	13.3107	13.1407	12.799	ITIH1	-1.09516	1.22447e-06	0.0122202	0.202532	0.362668	1	-0.133138	0.553902	1	-1.43082	3.09842e-10	3.43521e-06	-7.06468	NA
ENSG00000056050	HPF1	10.8259	11.2068	10.9439	12.2165	12.4812	12.8285	13.2144	9.69174	9.40172	10.6522	11.2378	11.7537	HPF1	0.186944	0.211735	1	-0.0339315	0.837144	1	-0.157969	0.287996	1	0.0629106	0.688375	1	-1.85405	NA
ENSG00000056097	ZFR	111.31	112.242	111.422	117.566	116.741	116.247	105.398	156.965	156.954	138.621	136.534	140.695	ZFR	0.0656062	0.673972	1	0.324416	0.0376474	1	0.24649	0.113507	1	-0.0123212	0.938085	1	-0.0379796	NA
ENSG00000056277	ZNF280C	3.29247	3.87137	3.29677	4.7044	4.39517	4.09507	1.31899	3.80148	3.8939	4.99068	4.75376	3.96226	ZNF280C	0.337813	0.304224	1	-0.208397	0.527644	1	0.0552779	0.868437	1	0.601502	0.0652149	1	-2.88632	NA
ENSG00000056558	TRAF1	1.69957	1.3498	1.23463	3.89116	3.65884	4.05274	2.8685	2.13537	2.56732	3.66829	4.34499	4.25496	TRAF1	1.4589	1.1673e-15	1.38932e-11	0.829331	1.40248e-05	0.180976	0.0810602	0.633552	1	0.710462	4.16786e-05	0.371356	0.856669	NA
ENSG00000056586	RC3H2	54.5089	57.3974	54.4551	75.4012	75.9696	72.9887	22.1778	59.1363	57.5952	78.7966	77.572	79.3535	RC3H2	0.431699	0.144341	1	-0.259717	0.379203	1	0.0713014	0.809199	1	0.762719	0.0101554	1	-2.93673	NA
ENSG00000056736	IL17RB	82.1691	80.4927	80.988	29.4049	27.317	29.5052	91.0951	70.9	74.5048	24.0138	23.5715	23.9774	IL17RB	-1.49958	1.00759e-30	1.29002e-26	-0.0435558	0.734278	1	-0.269214	0.0368077	1	-1.72524	1.50898e-39	1.96861e-35	39.6098	NA
ENSG00000056972	TRAF3IP2	14.8363	15.9252	15.2228	16.4344	15.3447	16.6237	15.5745	14.2525	13.4486	19.2615	17.1157	17.3568	TRAF3IP2	0.0741133	0.537245	1	-0.0894457	0.465779	1	0.15111	0.201841	1	0.314669	0.00873973	1	-3.51798	NA
ENSG00000056998	GYG2	29.7721	29.9276	30.4139	20.0457	20.0491	20.7294	22.8929	30.2908	28.7966	14.2061	14.5643	14.2625	GYG2	-0.567832	1.20757e-05	0.114864	-0.134989	0.295026	1	-0.500081	0.000129304	1	-0.932915	1.17109e-12	1.35343e-08	6.91103	NA
ENSG00000057019	DCBLD2	65.3406	67.6747	64.6627	94.6571	95.6734	92.3884	20.3899	62.2329	62.5656	93.1088	92.0906	92.1208	DCBLD2	0.516417	0.119369	1	-0.444941	0.179425	1	-0.0278258	0.933081	1	0.933534	0.00511793	1	-2.09811	NA
ENSG00000057252	SOAT1	50.0862	49.0686	49.8668	58.8194	57.2067	54.7883	20.1991	47.5072	49.1151	61.9086	60.0088	61.9726	SOAT1	0.197018	0.469029	1	-0.350668	0.197664	1	0.106467	0.695405	1	0.654155	0.0165171	1	-1.86545	NA
ENSG00000057294	PKP2	45.1014	44.6558	43.7491	29.3635	29.5805	29.2512	22.9883	43.7206	41.6258	26.9892	25.122	27.3504	PKP2	-0.59862	0.00470654	1	-0.300568	0.154329	1	-0.1506	0.476616	1	-0.448649	0.0343465	1	1.49267	NA
ENSG00000057593	F7	25.5743	25.2665	24.3306	3.1744	3.94519	3.10744	66.1361	51.967	52.6583	4.5912	5.14844	4.97974	F7	-2.88827	1.96233e-70	2.61638e-66	1.1841	1.3029e-15	1.7481e-11	0.528734	0.000992683	1	-3.54368	1.59333e-103	2.13888e-99	-2.99271	CBP/p300 activity.dependent
ENSG00000057608	GDI2	411.243	408.182	416.481	206.237	202.456	203.524	496.542	411.088	408.433	209.934	213.06	216.031	GDI2	-1.01357	2.70783e-17	3.2716e-13	0.090562	0.444971	1	0.0618373	0.602667	1	-1.04229	3.48986e-18	4.25659e-14	-11.5091	NA
ENSG00000057663	ATG5	23.0819	23.872	23.0246	25.766	25.4216	26.2037	25.2053	24.1986	23.8094	28.6284	28.364	28.5351	ATG5	0.145493	0.161451	1	0.064775	0.536059	1	0.1444	0.160264	1	0.225115	0.0300715	1	3.47534	NA
ENSG00000057757	PITHD1	22.3885	22.4393	24.8118	23.4641	23.199	22.8458	27.017	21.5396	22.0966	27.857	27.1377	27.5595	PITHD1	-0.00292143	0.984119	1	0.0188394	0.877919	1	0.248438	0.0476931	1	0.226675	0.073468	1	12.0319	NA
ENSG00000057935	MTA3	65.2094	65.2486	63.6488	78.8885	79.324	79.3518	74.9802	71.4217	74.4377	91.2767	90.3286	90.6991	MTA3	0.291617	0.00424345	1	0.186142	0.0686566	1	0.196973	0.0523079	1	0.302446	0.00298199	1	1.62481	NA
ENSG00000058056	USP13	55.0711	55.7737	55.5377	23.1884	24.1535	22.1968	39.413	51.7482	49.854	19.1788	18.7226	18.5136	USP13	-1.25966	3.22261e-21	3.98669e-17	-0.237858	0.0692859	1	-0.302195	0.0229541	1	-1.32399	4.73099e-23	5.91942e-19	5.56631	NA
ENSG00000058063	ATP11B	28.2729	28.8196	27.3723	70.2737	67.5154	64.735	7.42167	33.724	33.4816	75.4356	76.0215	76.984	ATP11B	1.26257	0.00326552	1	-0.178091	0.673776	1	0.1738	0.680955	1	1.61446	0.000192635	1	-9.06536	NA
ENSG00000058262	SEC61A1	275.678	285.255	280.5	215.444	214.728	214.91	309.981	260.314	258.547	198.501	205.659	204.601	SEC61A1	-0.383413	0.000939849	1	-0.0219096	0.850609	1	-0.0836189	0.470223	1	-0.445123	0.000123947	1	20.3163	NA
ENSG00000058272	PPP1R12A	44.5204	45.5155	48.4061	69.9429	68.279	67.712	54.6697	46.3796	49.5517	68.3966	70.3268	71.0464	PPP1R12A	0.573117	5.38586e-07	0.00545695	0.120804	0.29116	1	0.026631	0.81502	1	0.478943	2.79037e-05	0.252611	3.96464	NA
ENSG00000058335	RASGRF1	1.49343	1.3116	1.52676	0.0454933	0.072617	0.0458184	1.24748	0.957322	1.19037	0.0454844	0.0458052	0.0595857	RASGRF1	-5.82142	6.08026e-52	8.02168e-48	-0.369945	0.090793	1	-0.287644	1	1	-5.73443	5.35898e-42	7.01223e-38	15.5008	NA
ENSG00000058453	CROCC	10.32	10.1944	10.6517	16.0622	16.2174	15.3681	10.4015	9.80954	10.0062	14.5505	14.7758	15.3915	CROCC	0.613671	1.68712e-08	0.000179155	-0.0461548	0.690568	1	-0.0917992	0.388944	1	0.568029	2.15742e-07	0.00221114	-12.307	NA
ENSG00000058600	POLR3E	105.894	105.785	102.898	86.9934	86.2919	87.803	103.372	141.162	139.944	101.332	102.423	101.668	POLR3E	-0.268949	0.0495011	1	0.289952	0.0342995	1	0.226346	0.0980225	1	-0.332556	0.0151403	1	-1.14694	NA
ENSG00000058668	ATP2B4	25.7242	26.0115	24.8805	43.6435	42.8482	41.7517	9.09037	30.3918	31.4162	43.9874	44.9123	44.55	ATP2B4	0.743849	0.0374357	1	-0.111051	0.754635	1	0.0574512	0.8718	1	0.912352	0.0108524	1	-8.21558	NA
ENSG00000058729	RIOK2	14.8738	16.0781	15.1197	12.9333	12.7539	12.0666	16.0989	17.1976	17.4452	13.7791	13.2253	12.7572	RIOK2	-0.287662	0.0102506	1	0.14075	0.21224	1	0.0748868	0.504263	1	-0.353529	0.00157266	1	-2.51175	NA
ENSG00000058799	YIPF1	15.1361	15.7342	15.3603	32.4097	30.6714	31.4381	29.7107	19.3518	19.8296	28.4356	27.5606	29.3435	YIPF1	1.0332	1.08186e-09	1.1815e-05	0.574292	0.000687712	1	-0.147532	0.376677	1	0.311366	0.0643882	1	0.542174	NA
ENSG00000058804	NDC1	99.8222	102.117	99.0146	47.5029	48.2071	47.9878	43.0842	90.8932	92.2038	47.1694	48.394	49.8744	NDC1	-1.06697	1.30767e-05	0.124211	-0.411744	0.0893638	1	0.0173739	0.943288	1	-0.637849	0.00875062	1	1.54914	NA
ENSG00000058866	DGKG	6.42205	6.50756	5.97755	6.63412	6.12692	6.70521	3.98891	6.25856	5.89217	5.43147	4.78195	5.20275	DGKG	0.0424954	0.812651	1	-0.222106	0.201204	1	-0.338136	0.0513879	1	-0.0735072	0.696306	1	0.330955	NA
ENSG00000059122	FLYWCH1	21.6577	21.9426	21.3405	31.0314	32.2668	31.7626	38.7694	23.9125	23.7422	26.9892	27.0531	26.3887	FLYWCH1	0.550379	0.00295223	1	0.411167	0.0263568	1	-0.241348	0.190179	1	-0.102139	0.577872	1	-0.248413	NA
ENSG00000059145	UNKL	16.0357	16.1736	16.4773	16.3517	17.0083	16.8918	9.59098	17.3827	18.8389	17.333	16.8901	18.5555	UNKL	0.0457125	0.833817	1	-0.0855258	0.689952	1	0.0709048	0.742955	1	0.202144	0.346647	1	-2.36354	NA
ENSG00000059377	TBXAS1	2.14933	2.26674	2.4891	2.01657	2.26799	1.68245	2.22486	2.18586	1.91243	1.6296	1.25803	1.38371	TBXAS1	-0.214106	0.222379	1	-0.133872	0.469556	1	-0.49133	0.00580119	1	-0.571465	0.00169469	1	4.26874	NA
ENSG00000059378	PARP12	21.2829	20.7009	22.5262	19.9079	21.4263	21.3079	19.8654	26.7903	27.3021	18.9309	18.6944	19.1827	PARP12	-0.0425894	0.766814	1	0.199113	0.164957	1	-0.141245	0.320962	1	-0.382949	0.00732876	1	-1.92327	NA
ENSG00000059573	ALDH18A1	355.604	359.604	358.363	158.6	158.494	157.43	128.498	246.682	247.649	120.411	124.201	121.642	ALDH18A1	-1.17802	8.59056e-08	0.000895566	-0.785414	0.000322649	1	-0.373723	0.0857831	1	-0.766323	0.000452327	1	0.975694	NA
ENSG00000059588	TARBP1	41.9343	42.4781	41.2746	28.5641	27.5488	27.6569	26.6832	39.9508	39.4764	21.9889	21.6404	22.9738	TARBP1	-0.585828	0.000227939	1	-0.243147	0.124454	1	-0.331238	0.0373506	1	-0.673913	2.44546e-05	0.222464	2.77163	NA
ENSG00000059691	GATB	40.4913	38.7722	40.57	26.9651	25.708	27.0784	41.3678	33.4211	32.2894	21.9063	23.2614	22.6951	GATB	-0.58804	4.43356e-06	0.0431873	-0.163802	0.202452	1	-0.233179	0.0692425	1	-0.657413	3.16434e-07	0.00322352	4.01346	NA
ENSG00000059728	MXD1	14.1242	14.9701	14.2777	54.6843	54.575	53.0388	9.25724	21.7415	22.0126	75.0636	75.063	78.2105	MXD1	1.90601	5.46054e-12	6.21737e-08	0.291849	0.28068	1	0.49275	0.0652175	1	2.1069	3.39946e-14	3.9981e-10	7.21915	NA
ENSG00000059758	CDK17	25.9679	24.617	25.2758	43.7675	43.0664	41.8786	7.30248	31.553	30.7277	49.401	49.3102	50.9894	CDK17	0.763426	0.063543	1	-0.12393	0.761954	1	0.218068	0.59403	1	1.10542	0.00753695	1	-8.91974	NA
ENSG00000059769	DNAJC25	8.31478	8.79989	8.86455	7.95736	7.32688	7.93268	9.42411	7.28514	7.82326	7.20844	7.34736	7.53041	DNAJC25	-0.162986	0.225684	1	-0.0877849	0.532858	1	-0.0722549	0.591686	1	-0.14745	0.269402	1	1.67967	NA
ENSG00000059804	SLC2A3	454.233	465.013	456.367	110.55	107.373	109.799	141.681	223.306	226.457	99.4314	100.28	100.944	SLC2A3	-2.06983	2.02537e-31	2.59632e-27	-1.21765	2.02624e-12	2.7107e-08	-0.124396	0.467234	1	-0.976571	1.50728e-08	0.00016045	0.802011	NA
ENSG00000059915	PSD	0.781309	0.623896	0.56443	2.19576	1.95436	1.95052	0.913737	0.603906	0.434721	1.60205	1.3567	1.53702	PSD	1.67979	2.9549e-12	3.37893e-08	-0.050187	0.916315	1	-0.447915	0.0383029	1	1.28212	4.54756e-07	0.0046044	-25.5469	NA
ENSG00000060069	CTDP1	33.5201	33.2897	33.4728	33.9535	34.544	36.1504	54.336	33.7577	34.1701	33.0639	33.3821	31.9918	CTDP1	0.0615171	0.735192	1	0.284982	0.115953	1	-0.0883309	0.626215	1	-0.311798	0.0851038	1	-1.0941	NA
ENSG00000060138	YBX3	180.217	184.355	187.326	178.834	181.088	184.632	187.689	217.096	215.693	215.705	213.257	213.508	YBX3	-0.0193349	0.860551	1	0.169173	0.123965	1	0.23859	0.0297487	1	0.0500823	0.647838	1	0.296043	NA
ENSG00000060237	WNK1	186.345	188.003	179.954	169.696	166.525	158.122	54.0261	175.713	176.5	180.91	179.47	180.642	WNK1	-0.165186	0.633609	1	-0.448249	0.19653	1	0.130196	0.707117	1	0.41326	0.233594	1	-0.921943	NA
ENSG00000060339	CCAR1	72.3868	72.2785	70.746	99.1506	97.4324	91.5842	139.201	111.762	117.61	143.249	140.411	149.671	CCAR1	0.419988	0.000529434	1	0.774771	1.90385e-10	2.53897e-06	0.588707	1.12375e-06	0.0149301	0.23392	0.0527056	1	0.301922	Dox.only
ENSG00000060491	OGFR	115.807	112.356	113.742	109.516	115.936	116.881	260.397	120.563	120.851	105.12	104.565	103.675	OGFR	0.00180675	0.994744	1	0.55344	0.0361805	1	-0.127611	0.628236	1	-0.679246	0.0102424	1	-1.22732	NA
ENSG00000060566	CREB3L3	25.0683	25.0755	24.2447	0.927653	1.28621	1.04755	25.4675	22.0445	23.9101	0.816879	0.806972	0.658924	CREB3L3	-4.54904	2.29301e-155	3.09304e-151	-0.0594491	0.668545	1	-0.533	0.00900765	1	-5.0224	9.19241e-173	1.23987e-168	84.4823	NA
ENSG00000060642	PIGV	28.3478	28.514	28.1628	24.7873	24.358	23.4524	42.369	30.9472	32.3902	26.0387	25.7281	23.8659	PIGV	-0.228184	0.105493	1	0.313052	0.0260255	1	0.0591444	0.675181	1	-0.482096	0.000607402	1	-1.53998	NA
ENSG00000060656	PTPRU	143.599	145.156	145.275	69.6534	69.3426	70.0259	70.4032	144.596	142.429	64.1677	62.7293	62.0981	PTPRU	-1.05446	6.39203e-06	0.0617151	-0.279903	0.226026	1	-0.14537	0.53007	1	-0.919926	7.97522e-05	0.691292	3.28659	NA
ENSG00000060688	SNRNP40	69.7445	70.5401	70.5742	31.6516	32.1986	30.3235	95.1	65.4809	63.6403	31.0666	31.4369	31.2252	SNRNP40	-1.16363	8.04687e-13	9.27885e-09	0.0880127	0.581892	1	-0.00685489	0.967127	1	-1.25849	1.0778e-14	1.276e-10	-14.299	NA
ENSG00000060749	QSER1	56.1018	59.2122	56.3282	45.9729	44.3754	44.8838	18.3874	53.5153	54.8412	52.3901	50.2546	50.5992	QSER1	-0.344163	0.287062	1	-0.437141	0.176441	1	0.180505	0.576366	1	0.273485	0.396981	1	-0.625621	NA
ENSG00000060762	MPC1	35.4315	32.5256	32.4589	15.1938	16.5038	16.525	50.784	31.4016	31.4834	14.1372	14.7476	15.2661	MPC1	-1.05958	2.42886e-08	0.000256779	0.177816	0.342255	1	-0.127519	0.501075	1	-1.36492	9.20548e-13	1.06507e-08	-7.676	NA
ENSG00000060971	ACAA1	111.272	107.122	111.147	38.254	39.4938	40.0304	88.3537	107.285	100.197	33.9318	33.9741	33.2741	ACAA1	-1.48511	1.66609e-36	2.15808e-32	-0.155349	0.176882	1	-0.219323	0.0596352	1	-1.54908	2.59248e-39	3.37956e-35	9.97164	NA
ENSG00000060982	BCAT1	32.3395	33.7672	34.3836	8.02628	7.74959	8.05966	67.0181	115.868	119.76	34.896	35.4541	34.9745	BCAT1	-2.08003	2.52928e-23	3.16135e-19	1.5918	6.53632e-15	8.7639e-11	2.14789	1.04491e-24	1.40896e-20	-1.52398	7.32941e-14	8.59153e-10	-0.957396	CBP/p300 activity.dependent
ENSG00000061273	HDAC7	9.17682	9.41118	9.55193	23.3814	22.4081	22.7893	8.82815	11.2064	11.2489	20.1844	19.7093	20.005	HDAC7	1.28773	8.06446e-24	1.00959e-19	0.157126	0.23668	1	-0.195501	0.114599	1	0.935096	1.91284e-13	2.23362e-09	5.95126	NA
ENSG00000061656	SPAG4	58.2569	57.3401	56.9125	33.4435	33.1668	35.7977	106.256	48.0121	47.0833	44.2629	45.9413	43.658	SPAG4	-0.752861	0.0067169	1	0.222613	0.420032	1	0.386723	0.162237	1	-0.588755	0.0335109	1	-2.64474	NA
ENSG00000061676	NCKAP1	163.482	164.564	165.845	318.326	309.033	302.103	87.4478	177.093	181.185	337.173	338.3	342.853	NCKAP1	0.912324	0.000101653	0.913657	-0.147825	0.525603	1	0.131743	0.571474	1	1.19189	4.41842e-07	0.0044763	-8.06288	NA
ENSG00000061794	MRPS35	73.0427	73.3864	75.8498	51.2521	48.2889	50.1464	78.6513	76.5209	78.7532	56.5777	56.8514	54.2231	MRPS35	-0.57074	4.96944e-08	0.000521543	0.0736256	0.480578	1	0.163618	0.117357	1	-0.480749	4.21064e-06	0.040439	-6.52965	NA
ENSG00000061936	SFSWAP	43.2274	43.9299	43.7663	42.6924	42.071	41.5824	82.1079	45.1343	45.5888	47.1281	49.0283	47.4213	SFSWAP	-0.0513837	0.811143	1	0.400115	0.0622563	1	0.184575	0.389231	1	-0.266928	0.212594	1	-0.667127	NA
ENSG00000061938	TNK2	13.8806	15.1038	14.4495	21.493	22.2581	22.2673	25.8727	18.7122	17.5963	22.6914	21.147	21.5661	TNK2	0.605095	0.000107625	0.964753	0.516259	0.000976513	1	-0.0134785	0.931943	1	0.0753475	0.634026	1	0.145949	NA
ENSG00000061987	MON2	32.1895	32.0289	33.404	52.4237	49.9252	47.5645	10.7829	29.6008	31.8024	49.828	49.719	49.8465	MON2	0.619297	0.0499629	1	-0.434873	0.168134	1	-0.00501784	0.987608	1	1.04916	0.0009693	1	-2.41256	NA
ENSG00000062194	GPBP1	54.0404	54.2263	53.3896	56.3521	55.8022	54.0687	33.0481	58.7997	59.5263	62.4183	62.1654	63.7288	GPBP1	0.04022	0.841537	1	-0.0940632	0.638263	1	0.180098	0.36877	1	0.314381	0.116681	1	-3.34223	NA
ENSG00000062282	DGAT2	36.5559	36.4034	36.7378	12.8092	13.3266	12.377	48.281	39.2608	40.484	10.1838	10.7726	10.2762	DGAT2	-1.51224	8.67284e-34	1.11871e-29	0.222082	0.0669721	1	-0.303167	0.0159096	1	-2.03748	2.78505e-58	3.68991e-54	-9.17446	NA
ENSG00000062370	ZNF112	4.45435	3.92868	4.12163	5.77953	5.89511	5.88689	2.34405	4.22221	4.21295	7.08446	7.51651	7.16802	ZNF112	0.492922	0.0157691	1	-0.20566	0.314239	1	0.311269	0.118527	1	1.00985	7.38048e-07	0.00739229	-4.9103	NA
ENSG00000062485	CS	225.905	224.986	227.108	114.588	115.65	114.37	260.564	210.381	211.142	110.038	108.272	107.954	CS	-0.97651	6.2832e-16	7.49146e-12	0.00846213	0.94317	1	-0.0789346	0.510543	1	-1.06391	1.47804e-18	1.80882e-14	-125.726	NA
ENSG00000062598	ELMO2	34.7382	32.7166	33.7477	47.1721	46.8844	46.0408	28.6857	39.143	40.2993	45.6818	43.7565	45.3166	ELMO2	0.46953	0.00113821	1	0.0968332	0.506777	1	-0.0561271	0.696286	1	0.316569	0.0277596	1	3.26922	NA
ENSG00000062650	WAPL	82.9936	82.8232	81.3489	80.0326	77.5377	75.9375	58.6746	93.0305	94.9912	79.6231	79.8132	81.1097	WAPL	-0.0820305	0.636329	1	-0.00219368	0.9891	1	0.0428563	0.804941	1	-0.0369806	0.83271	1	16.8578	NA
ENSG00000062716	VMP1	192.997	194.918	195.781	193.487	196.36	191.08	169.047	164.774	168.793	213.97	219.318	218.748	VMP1	-0.00686329	0.945928	1	-0.215831	0.032378	1	0.166617	0.0976403	1	0.375584	0.00019558	1	-1.74018	NA
ENSG00000062725	APPBP2	54.2652	53.9971	55.0565	96.6833	96.5597	95.6899	36.4571	64.0672	66.2263	95.9326	97.5879	98.379	APPBP2	0.82338	3.96354e-05	0.366549	0.0307413	0.879603	1	0.0147405	0.941146	1	0.807379	5.50678e-05	0.484762	26.2636	NA
ENSG00000062822	POLD1	64.01	64.3317	66.7936	21.9892	21.5081	22.1826	51.7614	57.0494	55.9159	19.661	18.934	19.2105	POLD1	-1.57231	1.20968e-45	1.5871e-41	-0.244145	0.0239208	1	-0.184482	0.0952979	1	-1.51264	3.54644e-42	4.643e-38	6.19566	NA
ENSG00000063046	EIF4B	575.143	583.221	573.892	346.734	344.909	339.915	331.293	536.904	556.876	329.858	334.452	336.651	EIF4B	-0.747877	4.29675e-05	0.396461	-0.281542	0.121737	1	-0.0434438	0.811252	1	-0.509779	0.00517206	1	1.81067	NA
ENSG00000063169	BICRA	12.0066	10.863	11.7516	18.5295	19.5718	20.0099	8.78047	13.8317	14.0028	19.7436	19.822	19.2802	BICRA	0.748566	1.84296e-05	0.173533	0.0843631	0.641005	1	0.0181623	0.917627	1	0.682362	8.82899e-05	0.761677	8.08839	NA
ENSG00000063176	SPHK2	8.22108	8.43694	8.88174	15.2765	14.6493	14.3522	10.3777	9.54027	9.46889	13.4071	12.7742	14.2625	SPHK2	0.795624	8.63926e-12	9.80642e-08	0.200706	0.0926556	1	-0.13095	0.248533	1	0.463963	6.91307e-05	0.603096	2.31166	NA
ENSG00000063177	RPL18	555.953	545.588	567.791	386.762	398.102	412.928	2467.63	530.475	516.239	393.016	380.516	376.221	RPL18	-0.478924	0.33948	1	1.07401	0.0337389	1	-0.0590581	0.906051	1	-1.61199	0.00166242	1	-1.50091	NA
ENSG00000063180	CA11	0.275329	0.146326	0.306662	0.858734	0.94531	1.00522	0.889898	0.385125	0.300384	0.816879	0.933833	0.867996	CA11	2.08035	3.31313e-07	0.00338271	1.16206	0.00668091	1	-0.104816	0.792971	1	0.812231	0.0386512	1	0.698958	NA
ENSG00000063241	ISOC2	45.0452	43.9108	43.2336	11.9133	12.9039	13.5339	152.384	37.4096	35.5639	11.8919	11.7875	11.2798	ISOC2	-1.78766	0.000197787	1	0.769708	0.100478	1	-0.133923	0.775253	1	-2.69129	5.76336e-08	0.000602675	-3.4965	NA
ENSG00000063244	U2AF2	165.168	164.182	167.65	168.4	171.475	174.488	176.485	132.664	131.8	143.897	145.274	143.845	U2AF2	0.0495439	0.713271	1	-0.173027	0.200144	1	-0.248415	0.0652815	1	-0.0258436	0.847264	1	0.149362	NA
ENSG00000063245	EPN1	214.642	210.659	216.574	130.771	133.595	136.267	324.332	200.856	199.724	131.72	127.499	128.095	EPN1	-0.680138	0.000199373	1	0.175332	0.335279	1	-0.048785	0.78894	1	-0.904255	8.25079e-07	0.00824583	-5.15739	NA
ENSG00000063322	MED29	30.428	30.3478	29.8469	35.704	35.7985	36.7007	30.5451	29.7018	29.8545	33.2568	34.1291	33.288	MED29	0.25606	0.0129678	1	-0.00853259	0.937543	1	-0.104138	0.309454	1	0.160455	0.120655	1	-18.805	NA
ENSG00000063587	ZNF275	22.6321	21.9044	23.5401	24.5392	24.058	23.0151	16.7664	22.684	23.0873	22.044	23.0358	23.0714	ZNF275	0.0730547	0.606349	1	-0.120542	0.393265	1	-0.0715882	0.612397	1	0.122011	0.385573	1	-1.01219	NA
ENSG00000063601	MTMR1	17.5161	16.9186	17.1131	32.8646	32.1714	30.6339	7.27864	15.2622	15.0943	28.8901	28.5473	28.2285	MTMR1	0.893311	0.000159724	1	-0.451955	0.0557776	1	-0.159506	0.496211	1	1.18577	6.32642e-07	0.00636184	-2.62365	NA
ENSG00000063660	GPC1	15.1924	15.0274	14.4667	5.58656	5.54058	6.29605	19.2456	13.9496	12.7434	6.38194	5.90961	5.94147	GPC1	-1.36341	1.00923e-15	1.20179e-11	0.0371592	0.819142	1	0.0660607	0.703481	1	-1.33451	3.60213e-15	4.28798e-11	-35.9132	NA
ENSG00000063761	ADCK1	4.37939	4.27253	4.22473	3.71197	3.6043	4.27848	6.46813	4.13806	4.56559	3.29636	3.20324	2.9169	ADCK1	-0.152526	0.420182	1	0.23069	0.212291	1	-0.302558	0.105444	1	-0.685767	0.000241007	1	-2.97267	NA
ENSG00000063854	HAGH	69.6133	68.2096	68.9073	47.3237	50.7843	51.9524	126.543	72.5661	70.4579	52.6794	52.2562	50.9755	HAGH	-0.462445	0.0272222	1	0.382548	0.067286	1	0.0552164	0.79206	1	-0.789778	0.00017	1	-2.06452	NA
ENSG00000063978	RNF4	63.6352	59.1739	60.968	69.5845	68.3745	67.6556	32.1661	55.4338	53.2796	68.4103	68.2971	67.3806	RNF4	0.162058	0.385867	1	-0.382812	0.0408054	1	-0.0107562	0.954435	1	0.534116	0.00433696	1	-1.39524	NA
ENSG00000064012	CASP8	41.4658	42.9366	41.6011	71.4177	73.1197	68.7702	34.1686	40.3379	41.4075	60.4071	61.7426	64.2027	CASP8	0.759926	1.6933e-10	1.88057e-06	-0.119491	0.315286	1	-0.195003	0.0981078	1	0.684416	8.88678e-09	9.52307e-05	-5.72777	NA
ENSG00000064102	INTS13	39.8354	40.4723	39.6936	39.0121	36.8212	39.2403	39.866	46.2618	47.9229	45.2685	45.5889	45.4281	INTS13	-0.0605373	0.606183	1	0.16068	0.172327	1	0.244267	0.0364267	1	0.0230469	0.842025	1	0.143433	NA
ENSG00000064115	TM7SF3	71.0375	68.6489	70.9007	61.3694	60.9975	61.1937	74.3127	69.419	72.3051	61.2198	60.6854	61.7078	TM7SF3	-0.198273	0.055118	1	0.0366605	0.7231	1	0.000414772	0.997643	1	-0.234519	0.023271	1	-6.39705	NA
ENSG00000064199	SPA17	0.931229	0.948643	1.33773	1.46522	1.49074	1.34384	1.08061	0.923663	0.871316	1.16125	1.30032	1.38371	SPA17	0.422608	0.0350226	1	-0.186118	0.447683	1	-0.165472	0.387768	1	0.443341	0.0366879	1	-2.38204	NA
ENSG00000064225	ST3GAL6	10.0576	10.5956	10.394	8.71547	8.88136	9.11783	9.47179	10.6005	10.0734	8.35175	7.98167	9.32843	ST3GAL6	-0.217538	0.0705555	1	-0.0408353	0.735258	1	-0.0581264	0.630794	1	-0.234826	0.0528239	1	5.75056	NA
ENSG00000064300	NGFR	2.74901	2.80161	2.93589	0.183331	0.0862528	0.0599273	4.44185	4.17172	3.37334	0.155684	0.327719	0.171091	NGFR	-5.12272	3.77571e-55	4.99111e-51	0.499358	0.0202392	1	1.22823	0.0084633	1	-4.39613	3.49939e-54	4.62829e-50	-8.80357	NA
ENSG00000064309	CDON	15.4547	14.9701	15.2056	17.1787	15.6311	15.9183	1.77193	14.2525	13.499	14.9637	13.9019	14.1789	CDON	0.0949356	0.860186	1	-0.628282	0.243278	1	-0.179277	0.738636	1	0.54396	0.311703	1	-0.86579	NA
ENSG00000064313	TAF2	24.5998	23.8911	23.9869	34.6289	35.4303	33.6532	9.61482	27.2111	27.7219	35.6536	37.061	37.4973	TAF2	0.517516	0.100522	1	-0.166163	0.596871	1	0.0877633	0.780143	1	0.771443	0.014564	1	-4.6427	NA
ENSG00000064393	HIPK2	125.758	130.714	128.658	111.556	110.646	104.367	81.3451	135.154	140.935	111.884	111.021	113.167	HIPK2	-0.238017	0.204438	1	-0.107338	0.566553	1	0.0413953	0.825404	1	-0.0892833	0.634799	1	0.831792	NA
ENSG00000064419	TNPO3	60.9367	59.8425	59.9198	55.4837	55.175	52.9823	49.7113	60.9875	64.1777	59.498	59.5859	59.199	TNPO3	-0.143115	0.251869	1	-0.0465154	0.708329	1	0.12369	0.321287	1	0.0270897	0.826581	1	-0.582381	NA
ENSG00000064490	RFXANK	15.6234	14.7791	15.2744	22.8162	22.6808	22.5918	23.1313	15.4642	14.7752	19.537	19.3428	18.5276	RFXANK	0.576863	0.00070787	1	0.222238	0.191932	1	-0.246538	0.144948	1	0.108086	0.531425	1	0.486353	NA
ENSG00000064545	TMEM161A	30.1469	30.4242	31.2732	29.3222	30.6305	30.648	94.0749	34.5823	32.3062	28.2152	27.335	26.9044	TMEM161A	-0.0196951	0.95501	1	0.8095	0.0196449	1	-0.136062	0.693675	1	-0.965262	0.00551292	1	-1.19242	NA
ENSG00000064547	LPAR2	1.13737	1.29249	1.20026	2.33359	2.43161	2.10571	2.36789	1.76513	1.10641	2.15305	1.94872	1.99698	LPAR2	0.938045	0.000161272	1	0.524754	0.0377496	1	-0.174511	0.46102	1	0.238672	0.353782	1	0.454828	NA
ENSG00000064601	CTSA	144.686	142.844	146.719	123.906	129.231	127.717	220.396	129.045	128.542	110.079	107.765	106.505	CTSA	-0.189326	0.3367	1	0.138169	0.482836	1	-0.23175	0.239673	1	-0.559246	0.00464185	1	-4.04754	NA
ENSG00000064607	SUGP2	64.3661	65.4397	64.7142	59.2191	60.9157	57.4266	32.7859	56.6287	54.942	57.721	57.9226	55.7284	SUGP2	-0.131657	0.484988	1	-0.429636	0.022872	1	-0.0512173	0.786081	1	0.246764	0.190295	1	-0.574356	NA
ENSG00000064651	SLC12A2	14.8176	15.887	15.8587	25.4076	24.5353	24.0309	4.65639	12.4517	12.4243	23.7659	24.1494	24.6046	SLC12A2	0.668838	0.0241193	1	-0.655639	0.027462	1	-0.0286761	0.923171	1	1.29582	1.56409e-05	0.144631	-1.97642	NA
ENSG00000064652	SNX24	14.1242	14.1105	14.0543	19.0257	19.7218	20.6589	19.8177	16.1205	15.3629	20.8456	20.851	22.3884	SNX24	0.491202	0.0001609	1	0.276708	0.0344074	1	0.109558	0.394113	1	0.324044	0.0127414	1	1.17107	NA
ENSG00000064666	CNN2	117.606	118.068	117.471	111.363	111.177	116.797	50.1166	83.6734	83.4718	98.5912	98.645	99.2013	CNN2	-0.0575578	0.751721	1	-0.70045	0.000126772	1	-0.195044	0.283402	1	0.447851	0.0139702	1	-0.639376	NA
ENSG00000064687	ABCA7	65.1157	65.325	64.5252	46.1935	45.3436	45.6598	77.4356	77.8	75.546	48.5607	47.2522	45.3584	ABCA7	-0.507242	1.08835e-06	0.0108955	0.243381	0.0189575	1	0.0412337	0.692396	1	-0.70939	9.51826e-12	1.08413e-07	-2.91473	NA
ENSG00000064703	DDX20	15.7546	16.8231	15.7727	13.0022	12.7948	13.2094	13.0237	18.7964	18.6038	12.8699	13.2253	13.3147	DDX20	-0.310381	0.0420393	1	0.0634626	0.686538	1	0.0148866	0.924747	1	-0.358958	0.0191027	1	-5.65622	NA
ENSG00000064726	BTBD1	54.5089	55.9456	55.7439	67.5307	69.5199	68.5162	43.108	56.595	55.8656	67.2808	68.1702	66.0008	BTBD1	0.306846	0.0183493	1	-0.0945182	0.467124	1	-0.0291881	0.82243	1	0.372177	0.00421926	1	-3.93762	NA
ENSG00000064787	BCAS1	5.18521	4.67369	5.66823	0.610627	0.577143	0.539629	2.32021	2.05123	1.94601	0.197008	0.229049	0.171091	BCAS1	-3.23685	7.00995e-66	9.32534e-62	-1.31767	1.72999e-15	2.32078e-11	-1.69215	5.61517e-09	7.5058e-05	-3.60963	2.10719e-48	2.77517e-44	2.7394	NA
ENSG00000064932	SBNO2	53.0284	50.7114	52.8226	40.5835	39.8756	40.6229	69.4735	61.7616	57.1754	45.3374	45.5466	45.2469	SBNO2	-0.371026	0.00141973	1	0.26666	0.0215187	1	0.169133	0.145188	1	-0.468556	5.39874e-05	0.476061	-1.75713	NA
ENSG00000064933	PMS1	32.0958	30.9782	32.7682	20.8176	21.6172	21.0398	22.8691	34.4308	34.9426	20.267	20.4704	20.2838	PMS1	-0.595202	0.000258838	1	-0.053845	0.737873	1	-0.0569588	0.727632	1	-0.598314	0.000247286	1	11.1118	NA
ENSG00000064961	HMG20B	46.5631	44.0636	48.3546	59.3018	60.4248	60.7986	109.379	34.1616	33.3473	52.7483	51.4668	51.4076	HMG20B	0.377514	0.330892	1	0.347677	0.370326	1	-0.214263	0.580645	1	-0.184427	0.634167	1	-0.530455	NA
ENSG00000064989	CALCRL	0.0691895	0.108121	0.048894	1.03792	0.904402	1.07577	0.0317095	0.166344	0.0988781	0.927078	0.87745	1.06313	CALCRL	4.44758	1.41129e-28	1.79614e-24	0.761354	0.49376	1	-0.075418	0.773822	1	3.6059	5.40547e-24	6.78872e-20	4.73616	NA
ENSG00000064995	TAF11	26.4738	25.1519	25.671	23.3125	20.7991	22.7188	29.8538	19.7052	21.3577	19.8814	20.8933	20.6183	TAF11	-0.210188	0.192761	1	-0.126428	0.438835	1	-0.122593	0.447626	1	-0.206349	0.200152	1	1.63214	NA
ENSG00000064999	ANKS1A	48.156	48.1516	49.7122	65.7113	64.9655	61.4194	18.5781	50.1326	47.0329	56.8394	53.2852	54.5297	ANKS1A	0.395873	0.179956	1	-0.334739	0.256683	1	-0.222502	0.450435	1	0.508113	0.08543	1	-1.51794	NA
ENSG00000065000	AP3D1	202.93	205.788	205.782	190.813	194.683	192.745	249.455	222.482	224.492	206.655	204.236	206.455	AP3D1	-0.0877562	0.408224	1	0.180453	0.0890259	1	0.0944241	0.373193	1	-0.173785	0.10123	1	-0.963051	NA
ENSG00000065029	ZNF76	17.8534	16.8804	17.8864	21.9341	22.6945	22.4225	18.745	17.6015	17.8482	20.9145	19.7093	21.357	ZNF76	0.350029	0.00115374	1	0.041648	0.702504	1	-0.113575	0.286871	1	0.194807	0.071983	1	4.67746	NA
ENSG00000065054	SLC9A3R2	40.6413	42.6691	43.3367	51.3899	55.5841	55.917	98.056	36.0801	32.9107	39.0147	37.9914	37.0234	SLC9A3R2	0.363313	0.298428	1	0.399145	0.253301	1	-0.51484	0.140989	1	-0.550671	0.11547	1	-1.37963	NA
ENSG00000065057	NTHL1	19.2402	17.8355	18.8659	4.89737	4.91334	4.87105	55.7425	15.7839	15.9674	3.13106	3.23143	3.44655	NTHL1	-1.93639	7.20897e-06	0.0693863	0.645215	0.122396	1	-0.586273	0.16535	1	-3.16785	2.8384e-12	3.2616e-08	-4.90976	NA
ENSG00000065060	UHRF1BP1	46.7505	48.7056	48.7155	62.3618	59.3612	58.3719	35.0267	111.997	115.058	117.959	116.49	120.652	UHRF1BP1	0.321148	0.353615	1	0.862897	0.013225	1	0.979826	0.00495331	1	0.43807	0.205478	1	0.507673	NA
ENSG00000065135	GNAI3	98.9039	102.022	101.833	87.9444	87.4919	87.9159	56.1239	99.1227	99.0214	103.344	104.297	105.39	GNAI3	-0.201238	0.304418	1	-0.251411	0.199342	1	0.249389	0.202961	1	0.299562	0.126154	1	-1.19152	NA
ENSG00000065150	IPO5	442.483	446.407	450.885	185.588	180.665	179.2	230.002	430.206	429.843	193.073	191.014	193.59	IPO5	-1.2966	1.51788e-09	1.65069e-05	-0.297509	0.159088	1	0.0828188	0.695118	1	-0.916271	1.68175e-05	0.155124	3.07981	NA
ENSG00000065154	OAT	53.8342	53.4049	54.9363	58.6402	59.1976	58.2732	29.6631	43.2157	43.8424	45.3925	46.4629	44.564	OAT	0.118979	0.440779	1	-0.47362	0.00222264	1	-0.368655	0.0168948	1	0.223949	0.146871	1	-0.472845	NA
ENSG00000065183	WDR3	42.8713	42.2871	42.7181	18.3365	18.1674	18.1757	22.4161	45.0165	42.7677	17.209	17.0875	17.301	WDR3	-1.22703	5.69973e-08	0.000597332	-0.213781	0.336397	1	-0.0838427	0.708978	1	-1.09708	1.17418e-06	0.0116561	5.13182	NA
ENSG00000065243	PKN2	79.7704	82.1546	78.3931	100.033	94.3234	91.9087	40.009	87.1907	86.6288	96.1943	95.6427	98.3093	PKN2	0.252499	0.308483	1	-0.16808	0.497419	1	0.0194345	0.93765	1	0.440014	0.0761261	1	-2.61788	NA
ENSG00000065268	WDR18	67.5519	71.7627	69.7149	59.991	62.0747	62.6469	219.323	72.6502	67.788	62.5698	60.3048	59.0178	WDR18	-0.178505	0.63547	1	0.783357	0.0384439	1	-0.0222075	0.953156	1	-0.984072	0.00954461	1	-1.25622	NA
ENSG00000065308	TRAM2	182.466	182.463	179.851	193.914	189.529	184.449	98.6996	170.832	177.155	171.819	170.956	168.836	TRAM2	0.0599551	0.75983	1	-0.28618	0.144562	1	-0.150595	0.442342	1	0.195541	0.318432	1	-0.683279	NA
ENSG00000065328	MCM10	29.6596	31.4176	29.5032	3.43629	3.57702	3.57304	15.6937	28.002	28.3768	4.13663	4.57052	4.82642	MCM10	-3.10776	1.68754e-41	2.20393e-37	-0.328553	0.117194	1	0.356983	0.103683	1	-2.42224	2.8741e-27	3.65499e-23	7.37245	NA
ENSG00000065357	DGKA	3.32995	3.31739	3.4858	16.5309	16.5174	17.5408	4.32265	2.7244	2.88637	16.3825	15.7625	15.5309	DGKA	2.32958	2.11048e-40	2.75144e-36	-0.0425533	0.845078	1	-0.0856886	0.595313	1	2.28644	1.81745e-38	2.36596e-34	-53.7313	NA
ENSG00000065361	ERBB3	362.294	364.207	361.182	127.848	124.813	122.68	546.889	438.923	434.663	146.404	145.992	148.696	ERBB3	-1.5352	8.54389e-34	1.10216e-29	0.385043	0.00189545	1	0.232924	0.0607343	1	-1.68732	3.58175e-40	4.67705e-36	-4.38217	NA
ENSG00000065427	KARS	199.688	196.638	197.293	99.8674	97.0779	102.617	179.87	206.191	209.346	111.87	110.824	112.554	KARS	-0.986897	6.44302e-19	7.86241e-15	0.00452437	0.968177	1	0.162425	0.140764	1	-0.828997	7.24591e-14	8.49439e-10	-183.229	NA
ENSG00000065457	ADAT1	14.9487	13.4992	15.4806	19.453	19.1355	18.7401	29.1148	17.753	19.561	19.0962	18.8635	20.005	ADAT1	0.384628	0.0340104	1	0.595422	0.00104926	1	0.0159402	0.93097	1	-0.194866	0.278664	1	-0.327273	NA
ENSG00000065485	PDIA5	50.1799	47.8651	47.6156	22.8162	24.5489	24.1156	36.4094	40.9269	39.4764	23.2424	22.5989	22.4999	PDIA5	-1.02787	2.71208e-20	3.33992e-16	-0.317966	0.00393088	1	-0.0648717	0.561575	1	-0.774775	3.67478e-12	4.2135e-08	2.43666	NA
ENSG00000065491	TBC1D22B	22.2011	24.7507	21.7014	24.3462	24.808	24.4118	15.8844	25.7469	25.5726	28.5595	26.9122	27.7685	TBC1D22B	0.0999409	0.579284	1	-0.0288531	0.869946	1	0.17845	0.319494	1	0.307242	0.0864138	1	-10.6485	NA
ENSG00000065518	NDUFB4	53.6093	51.3227	53.2694	56.6829	59.1294	62.5058	198.011	40.0518	39.6947	51.2468	54.5397	54.5297	NDUFB4	0.172781	0.737953	1	0.812189	0.117733	1	-0.153614	0.766065	1	-0.793026	0.126494	1	-0.976406	NA
ENSG00000065526	SPEN	76.2847	80.3589	76.4341	102.941	96.0279	96.0144	33.1673	81.351	82.33	103.371	97.306	98.825	SPEN	0.339943	0.225418	1	-0.243372	0.385105	1	0.0219387	0.93772	1	0.605255	0.0312422	1	-2.48695	NA
ENSG00000065534	MYLK	36.7808	37.2439	36.3426	2.45765	2.58161	1.97873	15.6698	34.3803	34.5731	2.11172	2.21654	1.80185	MYLK	-3.99216	3.55631e-38	4.6193e-34	-0.382524	0.158302	1	-0.19813	0.495195	1	-3.80772	3.57338e-35	4.62859e-31	9.95421	NA
ENSG00000065548	ZC3H15	108.724	108.268	109.446	85.1877	82.8284	81.6092	170.525	117.046	118.87	86.2902	88.9613	91.6051	ZC3H15	-0.387164	0.0121737	1	0.315936	0.04051	1	0.09633	0.532395	1	-0.60677	8.69926e-05	0.750833	-1.92055	NA
ENSG00000065559	MAP2K4	41.9156	42.4399	42.6321	86.5109	84.4238	80.9743	18.3159	46.0767	42.6502	88.5906	86.0435	88.6781	MAP2K4	0.988717	0.000365845	1	-0.245844	0.371655	1	0.0638924	0.816183	1	1.29845	3.31224e-06	0.0320393	-5.28163	NA
ENSG00000065600	TMEM206	4.45435	4.7692	5.29017	7.39223	8.04958	7.66461	5.20468	6.72978	6.12726	8.69613	8.70055	8.39457	TMEM206	0.673233	1.81003e-06	0.0179259	0.321303	0.0278521	1	0.159136	0.242926	1	0.511039	0.000223912	1	1.59052	NA
ENSG00000065613	SLK	55.3709	53.7488	52.5304	89.0196	86.5101	84.7273	26.1588	54.9121	56.6716	95.5469	93.0773	97.6821	SLK	0.687374	0.0048367	1	-0.230285	0.343347	1	0.137667	0.570563	1	1.05533	1.6975e-05	0.156543	-4.5827	NA
ENSG00000065615	CYB5R4	12.0815	11.6653	11.4422	12.6438	12.8358	13.153	7.42167	11.2737	11.7022	12.9663	13.338	13.1196	CYB5R4	0.135076	0.420168	1	-0.207368	0.214608	1	0.0293291	0.861898	1	0.371778	0.0256379	1	-1.79284	NA
ENSG00000065621	GSTO2	1.98067	2.13302	1.61269	1.02414	1.23166	1.18864	2.79698	1.58001	1.79488	0.76178	0.637823	0.784367	GSTO2	-0.746805	0.00255424	1	0.0972082	0.689942	1	-0.679434	0.00935728	1	-1.52325	3.48771e-09	3.77929e-05	-15.67	NA
ENSG00000065665	SEC61A2	5.03529	5.55242	5.23862	14.9182	14.5266	13.6327	4.79943	5.34977	5.825	16.658	16.129	16.395	SEC61A2	1.45005	8.52553e-31	1.09186e-26	0.0184852	0.918624	1	0.191529	0.106363	1	1.62308	2.51414e-38	3.2714e-34	87.8044	NA
ENSG00000065802	ASB1	62.0236	60.855	60.5728	51.9689	50.0206	50.1323	64.3959	56.6624	53.5315	47.4587	48.4644	48.16	ASB1	-0.270302	0.0185233	1	-0.0721035	0.532784	1	-0.0783786	0.494893	1	-0.276577	0.0159985	1	3.83583	NA
ENSG00000065809	FAM107B	70.5878	71.4761	71.1584	41.0935	38.9075	39.72	34.3831	69.8565	69.4	63.2448	62.5883	63.91	FAM107B	-0.833156	0.000330289	1	-0.295778	0.199413	1	0.664773	0.00407804	1	0.127394	0.579763	1	-0.430708	NA
ENSG00000065882	TBC1D1	62.5858	63.8923	63.477	34.3808	34.1213	34.1188	40.4381	47.7765	48.8465	30.0335	30.1542	31.6155	TBC1D1	-0.888912	5.76808e-14	6.74404e-10	-0.470255	6.46372e-05	0.823607	-0.16086	0.173576	1	-0.579513	1.00396e-06	0.00999539	1.23234	NA
ENSG00000065883	CDK13	45.2138	48.4191	46.0519	70.9353	70.7062	67.2605	22.6545	52.9936	52.3224	64.3054	64.2939	66.8092	CDK13	0.580965	0.0288585	1	-0.125705	0.635024	1	-0.0963779	0.716068	1	0.610294	0.0216701	1	-4.85496	NA
ENSG00000065911	MTHFD2	61.6863	60.3774	60.0572	18.9568	18.1537	17.8653	177.534	307.184	309.847	175.262	179.413	181.548	MTHFD2	-1.72965	5.25774e-18	6.38027e-14	2.12597	5.48345e-26	7.38291e-22	3.28808	1.70682e-54	2.30523e-50	-0.567564	0.00343888	1	-0.266968	CBP/p300 activity.dependent
ENSG00000065923	SLC9A7	7.05921	6.98513	7.78193	16.71	14.513	15.0294	5.77681	7.25149	6.63102	14.7846	13.2112	13.928	SLC9A7	1.086	1.25611e-15	1.49439e-11	-0.147937	0.29017	1	-0.141999	0.281332	1	1.09195	1.29293e-15	1.54556e-11	-7.38115	NA
ENSG00000065970	FOXJ2	14.2928	15.2948	14.4323	16.2965	15.522	15.2834	5.94368	16.9957	16.2193	17.6498	17.7641	18.2906	FOXJ2	0.0978412	0.753246	1	-0.167127	0.588818	1	0.189592	0.540388	1	0.454561	0.14204	1	-2.71986	NA
ENSG00000065978	YBX1	1082.6	1092.52	1099.57	654.319	673.273	671.798	1346.05	1003.06	1013.97	696.711	696.485	698.066	YBX1	-0.711824	3.72923e-07	0.00380344	0.0383851	0.782901	1	0.0648173	0.641945	1	-0.685392	9.80764e-07	0.00977136	-17.8557	NA
ENSG00000065989	PDE4A	15.005	14.206	15.4978	19.136	18.8219	20.1792	16.9571	13.2259	13.18	20.0466	20.2026	19.8099	PDE4A	0.379332	0.00412616	1	-0.0475019	0.735046	1	0.0470312	0.720854	1	0.473865	0.000367495	1	-9.9757	NA
ENSG00000066027	PPP2R5A	39.7605	40.7589	40.1404	62.155	62.6611	62.9855	34.1924	49.0387	48.8632	70.7659	70.5806	71.7014	PPP2R5A	0.638652	1.86585e-05	0.175632	0.13179	0.379605	1	0.182051	0.219183	1	0.688911	3.78752e-06	0.0364928	5.22734	NA
ENSG00000066044	ELAVL1	119.893	119.577	120.873	97.8274	102.259	99.5134	66.6367	113.377	113.966	98.8804	97.4751	99.0201	ELAVL1	-0.266405	0.15563	1	-0.293297	0.117941	1	-0.0204946	0.913212	1	0.00639897	0.972149	1	-0.0218173	NA
ENSG00000066056	TIE1	0.331549	0.222737	0.237924	2.18197	1.968	2.20448	0.484643	0.435613	0.485097	1.72602	1.42718	1.66247	TIE1	3.15821	4.19887e-41	5.48078e-37	0.901834	0.00453267	1	-0.405906	0.0136969	1	1.8495	1.81535e-17	2.20474e-13	2.05082	NA
ENSG00000066084	DIP2B	102.015	106.167	105.493	131.556	125.127	122.299	33.0958	110.297	111.884	129.53	126.484	130.59	DIP2B	0.272932	0.440167	1	-0.297025	0.400854	1	0.0287312	0.935278	1	0.598689	0.0912061	1	-2.01562	NA
ENSG00000066117	SMARCD1	75.3665	75.1248	77.9291	80.3496	75.7242	77.7152	76.7681	86.0127	88.2576	78.2594	78.2204	78.4754	SMARCD1	0.0334958	0.76041	1	0.136621	0.214025	1	0.00718397	0.948249	1	-0.0959416	0.38239	1	-0.702248	NA
ENSG00000066135	KDM4A	8.03369	8.1504	7.78193	17.5233	18.6582	17.9218	9.13805	12.8893	13.6333	18.7518	20.555	19.7402	KDM4A	1.17789	1.07274e-13	1.25049e-09	0.578889	0.000297907	1	0.126316	0.412704	1	0.725298	3.19908e-06	0.0309841	1.25291	NA
ENSG00000066136	NFYC	48.662	45.0379	47.3579	43.0921	42.8209	41.8504	71.2137	52.7243	54.858	44.8277	44.1512	46.808	NFYC	-0.14292	0.302672	1	0.341398	0.0137224	1	0.0879249	0.52557	1	-0.396396	0.00417868	1	-1.16109	NA
ENSG00000066248	NGEF	39.1795	39.5363	39.9857	13.4157	13.313	14.1829	51.4992	45.5045	45.9246	13.3796	12.2104	12.353	NGEF	-1.5389	4.99761e-40	6.51088e-36	0.267486	0.0177051	1	-0.10881	0.352552	1	-1.9152	4.16815e-60	5.52697e-56	-7.15999	NA
ENSG00000066279	ASPM	78.8521	82.0782	79.5445	40.9832	40.421	36.7994	24.1802	58.177	57.3937	40.2269	40.0211	40.717	ASPM	-1.02516	0.000201281	1	-0.782757	0.00436028	1	0.0333349	0.903347	1	-0.20906	0.445471	1	0.267081	NA
ENSG00000066322	ELOVL1	39.5731	37.5305	38.5938	42.8165	43.2982	45.9138	71.762	35.4574	34.5563	42.8992	44.1935	42.3757	ELOVL1	0.190623	0.447286	1	0.292631	0.243122	1	-0.0282657	0.910566	1	-0.130275	0.602409	1	-0.445186	NA
ENSG00000066379	ZNRD1	8.68958	8.70438	8.50368	6.34466	6.1542	6.14085	36.5763	9.64125	8.66287	6.34062	6.262	7.29346	ZNRD1	-0.476373	0.299818	1	1.08483	0.0188144	1	0.0945454	0.838087	1	-1.46669	0.00163753	1	-1.352	NA
ENSG00000066422	ZBTB11	19.9523	18.9626	18.5566	28.1368	26.8534	26.2037	8.08915	20.6308	19.4938	26.7413	26.6443	26.7929	ZBTB11	0.499201	0.0756234	1	-0.251971	0.368989	1	-0.0181781	0.948874	1	0.732998	0.00920156	1	-2.90906	NA
ENSG00000066427	ATXN3	14.1804	14.0723	13.745	17.3717	17.9628	17.95	11.6649	14.9257	15.6652	22.4435	22.4297	21.6776	ATXN3	0.344135	0.00960639	1	0.0120834	0.94161	1	0.321231	0.0142243	1	0.653278	7.87919e-07	0.00788234	54.0642	NA
ENSG00000066455	GOLGA5	41.4846	41.16	42.2025	42.4856	43.1618	41.8081	25.396	45.9084	47.1169	42.789	42.5302	43.7416	GOLGA5	0.0298461	0.885859	1	-0.0753089	0.714704	1	0.0180666	0.930841	1	0.123222	0.549893	1	-1.63622	NA
ENSG00000066468	FGFR2	5.57875	5.01754	5.35891	0.114412	0.12716	0.0740361	1.9388	3.65001	4.02824	0.0592593	0.0880922	0.0595857	FGFR2	-6.12638	4.16954e-48	5.48086e-44	-0.729159	0.0135412	1	-0.955781	0.196276	1	-6.34789	5.0164e-43	6.57499e-39	8.70577	NA
ENSG00000066557	LRRC40	30.4842	31.0546	29.8297	16.269	15.7402	16.2005	14.1203	30.3918	31.433	18.0493	16.9888	17.5937	LRRC40	-0.923629	0.000251581	1	-0.265699	0.287662	1	0.12685	0.613863	1	-0.531078	0.0347153	1	1.9988	NA
ENSG00000066583	ISOC1	44.2019	45.248	47.0657	37.6338	37.8439	37.0393	23.7749	43.1316	43.9935	36.3561	37.6813	38.3197	ISOC1	-0.279142	0.178612	1	-0.29899	0.1494	1	-0.00205717	0.992775	1	0.0177931	0.930316	1	-0.0595106	NA
ENSG00000066651	TRMT11	27.7107	25.2665	28.4549	21.2449	20.2809	21.6042	12.2609	23.862	24.1116	24.5648	24.2904	23.5871	TRMT11	-0.367789	0.1013	1	-0.433806	0.0532508	1	0.198781	0.375384	1	0.264802	0.236779	1	-0.610416	NA
ENSG00000066654	THUMPD1	77.2217	80.4545	78.6337	106.621	104.823	101.827	72.5487	75.04	74.3873	99.2937	98.5464	98.6996	THUMPD1	0.406882	6.58275e-05	0.599688	-0.0901855	0.377931	1	-0.0792175	0.435422	1	0.417851	4.23478e-05	0.377022	-4.63324	NA
ENSG00000066697	MSANTD3	15.6983	15.505	15.9789	19.26	19.2719	19.9393	16.5042	14.3871	14.9599	25.8183	26.3765	26.4584	MSANTD3	0.309881	0.00498291	1	-0.0433908	0.708762	1	0.428368	7.70699e-05	1	0.781635	1.41333e-12	1.63112e-08	-18.0138	NA
ENSG00000066739	ATG2B	14.1242	15.7151	14.1918	38.8743	37.9529	36.2492	5.157	21.3881	21.3073	36.0806	36.8355	35.9641	ATG2B	1.36252	0.000873637	1	0.121563	0.765356	1	-0.0546016	0.892207	1	1.18635	0.00358825	1	9.75909	NA
ENSG00000066777	ARFGEF1	44.7641	46.1076	44.6427	79.0264	73.897	74.1174	18.9357	50.7384	52.2217	79.4854	76.2893	77.3185	ARFGEF1	0.744892	0.0145835	1	-0.152227	0.615766	1	0.0379707	0.900512	1	0.935091	0.00222738	1	-6.14274	NA
ENSG00000066813	ACSM2B	25.5181	25.1519	24.6056	0.0730607	0.0862528	0.0599273	30.9503	21.6069	22.063	0.0592593	0.0317095	0.0456476	ACSM2B	-9.17096	2.7219e-160	3.67239e-156	-0.0138291	0.947166	1	-1.46471	0.156512	1	-10.6061	1.048e-165	1.41323e-161	766.943	NA
ENSG00000066827	ZFAT	5.65371	4.7692	5.34173	9.74925	9.31771	8.97674	5.13317	4.89538	5.33802	9.30222	9.41943	8.93816	ZFAT	0.834193	2.18655e-11	2.46643e-07	-0.0376493	0.790949	1	-0.0200224	0.871617	1	0.85182	1.08035e-11	1.22944e-07	-22.6251	NA
ENSG00000066855	MTFR1	32.3207	33.1751	32.9916	22.2511	23.4853	22.4366	19.7224	32.7479	33.2969	25.0745	24.2904	25.0367	MTFR1	-0.531314	0.00411708	1	-0.198221	0.282168	1	0.126286	0.495034	1	-0.206805	0.265492	1	1.04331	NA
ENSG00000066923	STAG3	2.35547	2.17122	1.92201	2.71954	2.8816	2.59953	0.36545	2.28684	2.23148	2.71782	2.61122	2.97265	STAG3	0.35132	0.461175	1	-0.397186	0.400283	1	0.0178375	0.974961	1	0.766405	0.105978	1	-1.92958	NA
ENSG00000066926	FECH	17.235	16.5556	15.9446	26.0968	27.7124	26.6834	10.5684	14.6732	16.2193	22.2093	21.8377	21.3152	FECH	0.695682	8.94406e-06	0.0856305	-0.259773	0.0985144	1	-0.300776	0.0526596	1	0.654687	3.02517e-05	0.272931	-2.52023	NA
ENSG00000066933	MYO9A	12.194	13.0025	11.6484	28.4538	26.2398	26.5423	10.3061	12.5191	12.5251	29.7717	29.5481	31.2531	MYO9A	1.14291	9.97407e-20	1.22352e-15	-0.0565615	0.653052	1	0.157125	0.198526	1	1.35659	5.04608e-27	6.40954e-23	-23.9844	NA
ENSG00000067048	DDX3Y	124.578	125.613	123.726	148.91	142.417	140.5	31.5225	85.491	90.4574	141.776	139.974	145.769	DDX3Y	0.207781	0.501721	1	-0.849694	0.00635531	1	-0.0144717	0.962769	1	1.04301	0.000841805	1	-1.22751	NA
ENSG00000067057	PFKP	4.04207	4.46356	4.36221	5.43494	6.01784	5.7317	3.15456	3.16196	3.27259	3.70961	4.07717	3.85075	PFKP	0.419809	0.000882501	1	-0.426866	0.00169401	1	-0.566165	5.23861e-06	0.0692963	0.280577	0.0362646	1	-0.657294	NA
ENSG00000067064	IDI1	91.9139	86.5482	88.4289	28.8397	28.5988	29.745	20.5567	26.0498	25.7573	28.1325	27.1236	28.3121	IDI1	-1.61513	4.04315e-36	5.23426e-32	-1.88247	2.01101e-47	2.71346e-43	-0.061142	0.631038	1	0.206205	0.105378	1	-0.10954	NA
ENSG00000067066	SP100	23.1006	22.019	21.1687	37.8957	40.0938	36.9405	18.9357	24.064	24.0109	43.1747	41.4025	41.9297	SP100	0.794885	9.55934e-10	1.04503e-05	0.0176259	0.901122	1	0.138551	0.279641	1	0.915808	1.80684e-12	2.08184e-08	51.9582	NA
ENSG00000067082	KLF6	132.448	130.198	132.078	48.3575	47.4026	48.143	141.156	118.258	118.232	81.8822	85.5643	82.0714	KLF6	-1.45632	2.87144e-35	3.71334e-31	-0.0641727	0.578335	1	0.794426	7.91687e-12	1.06213e-07	-0.597727	2.2557e-07	0.00230939	9.31434	NA
ENSG00000067113	PLPP1	3.38617	3.45111	3.24521	8.43979	7.84504	8.39827	1.84344	3.21245	2.56732	7.71811	7.91119	7.58616	PLPP1	1.29962	2.11499e-13	2.45529e-09	-0.393533	0.0320459	1	-0.088744	0.600992	1	1.60444	5.4736e-19	6.71172e-15	-4.07702	NA
ENSG00000067141	NEO1	21.4328	23.1461	21.1171	56.0764	54.7114	57.6241	13.1191	29.6681	30.9292	60.476	58.4442	60.537	NEO1	1.35934	4.09504e-07	0.00416834	0.167702	0.528898	1	0.0916959	0.727824	1	1.28334	1.62671e-06	0.016015	7.65249	NA
ENSG00000067167	TRAM1	203.379	205.501	202.465	193.638	192.147	191.39	112.788	187.864	191.697	189.864	188.322	188.085	TRAM1	-0.0829902	0.651924	1	-0.312092	0.0899991	1	-0.0275241	0.881149	1	0.201579	0.273063	1	-0.645894	NA
ENSG00000067177	PHKA1	13.1122	12.1047	12.3358	20.7762	19.0128	18.5002	6.99258	15.4642	15.0103	17.0575	17.609	17.301	PHKA1	0.63555	0.0113319	1	-0.000670473	0.995716	1	-0.165901	0.506296	1	0.470321	0.0599237	1	-701.477	NA
ENSG00000067182	TNFRSF1A	69.276	70.5019	71.674	117.428	117.041	124.641	98.2467	76.9753	78.1319	113.523	107.835	110.547	TNFRSF1A	0.764325	1.88077e-09	2.03951e-05	0.260345	0.0401544	1	-0.113673	0.367946	1	0.390306	0.00208198	1	1.49919	NA
ENSG00000067191	CACNB1	0.856269	0.757616	0.890936	2.05792	2.45889	2.72651	1.08061	0.906834	1.20716	3.90246	3.69658	4.01801	CACNB1	1.56359	4.24824e-16	5.07453e-12	0.358506	0.113911	1	0.688813	1.51845e-05	0.200314	1.89368	1.02648e-25	1.29757e-21	5.28215	NA
ENSG00000067208	EVI5	10.3574	12.0665	11.2876	23.6708	23.2672	21.2232	5.68145	11.7113	10.9466	24.248	23.3882	23.2526	EVI5	1.01768	1.11061e-05	0.105846	-0.247469	0.283193	1	0.0566692	0.804635	1	1.32183	1.37202e-08	0.000146189	-5.34137	NA
ENSG00000067221	STOML1	3.08633	2.97354	3.91541	2.499	2.3498	2.74061	7.32632	5.48441	5.52274	3.75093	3.03409	3.40473	STOML1	-0.400545	0.0367692	1	0.877443	2.2816e-06	0.029768	0.429948	0.0227018	1	-0.848138	3.85372e-06	0.0371036	-0.966601	CBP/p300 activity.dependent
ENSG00000067225	PKM	1789.83	1776.02	1772.68	1581.56	1593.86	1640.75	3030.06	1367.48	1348.05	1368.71	1377.09	1370.59	PKM	-0.148559	0.590534	1	0.105995	0.701004	1	-0.226511	0.412124	1	-0.481065	0.0820722	1	-4.53855	NA
ENSG00000067248	DHX29	21.0767	21.7707	21.4436	33.2643	35.9757	34.8665	16.6472	20.5466	21.2066	26.5484	27.7438	25.9148	DHX29	0.696153	3.41059e-08	0.000358999	-0.136704	0.280427	1	-0.37665	0.00257937	1	0.456212	0.000302455	1	-3.33722	NA
ENSG00000067334	DNTTIP2	40.0041	39.3261	38.9031	34.3119	34.844	32.4398	49.1153	39.7994	40.3328	33.3257	33.6922	34.194	DNTTIP2	-0.218932	0.0751148	1	0.127606	0.298535	1	-0.00549136	0.965679	1	-0.35203	0.00416817	1	-2.75872	NA
ENSG00000067365	METTL22	24.3562	22.8213	23.5573	20.8452	21.3036	21.8581	54.6697	27.615	27.7723	26.6448	26.5034	26.4723	METTL22	-0.144395	0.547539	1	0.637293	0.00796367	1	0.315315	0.188098	1	-0.466383	0.0513485	1	-0.731819	NA
ENSG00000067369	TP53BP1	20.7207	19.8031	19.6736	44.057	42.071	40.9616	1.91496	16.7769	16.6055	37.7474	36.765	35.6296	TP53BP1	1.0792	0.055478	1	-0.770538	0.169546	1	-0.206637	0.71091	1	1.64312	0.00403178	1	-2.13243	NA
ENSG00000067445	TRO	7.28409	7.42449	7.42105	35.704	35.8667	36.4608	4.27498	5.51807	5.3884	30.4192	29.5903	30.2356	TRO	2.29199	2.67346e-72	3.5672e-68	-0.538963	5.31289e-05	0.678563	-0.259756	0.0296744	1	2.57123	4.53895e-87	6.07584e-83	-4.77069	NA
ENSG00000067533	RRP15	24.6186	23.5472	25.3961	16.7514	16.2993	15.5233	27.0647	20.8832	21.257	13.6689	14.3811	14.0674	RRP15	-0.599754	6.8103e-06	0.0656717	-0.0902871	0.50359	1	-0.206232	0.123411	1	-0.715693	8.94135e-08	0.000929542	7.92686	NA
ENSG00000067560	RHOA	360.777	360.387	357.607	383.702	391.162	398.241	463.406	334.363	336.58	445.884	445.596	445.257	RHOA	0.120954	0.403729	1	0.0723493	0.617267	1	0.188398	0.193311	1	0.237002	0.102004	1	3.2758	NA
ENSG00000067596	DHX8	66.4462	69.6041	65.9687	78.6542	79.5286	77.7434	70.5224	70.8663	73.2958	74.4713	75.6691	76.2174	DHX8	0.223981	0.0295594	1	0.0878947	0.395174	1	-0.0597603	0.560618	1	0.076326	0.458413	1	0.86838	NA
ENSG00000067601	PMS2P4	0.612649	0.58569	0.633168	1.17576	1.47711	1.31562	0.746867	0.75537	0.653019	1.299	1.21575	1.41158	PMS2P4	1.15362	2.05203e-08	0.000217351	0.239305	0.307079	1	-0.015932	0.951845	1	0.898238	7.53457e-06	0.0712996	3.75352	NA
ENSG00000067606	PRKCZ	31.871	32.1435	33.5415	27.0892	29.1987	28.0802	35.5274	39.8667	38.1834	28.6697	29.0124	28.1588	PRKCZ	-0.209817	0.0563528	1	0.220099	0.0455778	1	0.0249792	0.82121	1	-0.404939	0.000226934	1	-1.83981	NA
ENSG00000067646	ZFY	10.6011	10.7866	10.7205	20.9141	20.6354	20.1651	2.51092	13.3605	12.9617	19.964	20.8792	20.9249	ZFY	0.944602	0.0380296	1	-0.153878	0.733425	1	0.00125053	0.998358	1	1.09973	0.0159281	1	-7.14677	NA
ENSG00000067704	IARS2	227.423	230.087	225.991	210.165	210.16	207.376	48.0903	185.76	181.42	166.598	167.051	168.46	IARS2	-0.122882	0.748911	1	-0.718859	0.0623801	1	-0.322127	0.401782	1	0.273851	0.475805	1	-0.380952	NA
ENSG00000067829	IDH3G	20.1585	19.1536	20.4985	30.8108	31.7623	31.1418	56.839	17.0966	16.1857	25.4051	25.0233	24.5488	IDH3G	0.648646	0.109908	1	0.591311	0.144769	1	-0.322171	0.425569	1	-0.264841	0.512083	1	-0.447888	NA
ENSG00000067836	ROGDI	5.87859	5.89627	5.4792	10.659	11.104	10.6557	23.4889	4.91221	5.50595	9.05427	9.68725	8.99391	ROGDI	0.913436	0.0648903	1	0.976424	0.0487121	1	-0.225778	0.645665	1	-0.288802	0.555637	1	-0.295775	NA
ENSG00000067900	ROCK1	64.2911	65.9554	65.1782	88.0547	86.1692	82.2582	65.9931	65.9016	71.2136	84.3204	85.3387	88.7896	ROCK1	0.392415	0.000225359	1	0.0558182	0.601961	1	0.0110122	0.917664	1	0.347608	0.00107875	1	6.22751	NA
ENSG00000067955	CBFB	70.8689	70.8267	71.3475	133.5	131.59	129.65	39.7945	69.2507	66.9988	132.188	132.277	130.576	CBFB	0.890034	2.57768e-06	0.0253522	-0.274612	0.144559	1	0.00110162	0.995528	1	1.16575	9.0167e-10	9.90034e-06	-4.24507	NA
ENSG00000067992	PDK3	10.1138	10.6911	9.43164	16.5171	15.7538	16.2146	5.77681	7.90783	8.32703	18.8758	18.8635	18.2349	PDK3	0.68322	3.94929e-06	0.0385174	-0.45355	0.00264227	1	0.207577	0.153232	1	1.34436	2.87152e-19	3.52623e-15	-2.96408	NA
ENSG00000068001	HYAL2	52.0164	51.8958	54.1973	28.7295	29.4169	30.2953	135.411	48.5338	46.6971	23.5042	25.1925	23.2665	HYAL2	-0.838776	0.0168528	1	0.544592	0.118995	1	-0.297804	0.393972	1	-1.68117	2.60783e-06	0.0253872	-3.08703	NA
ENSG00000068024	HDAC4	33.1078	33.4425	31.3075	22.706	23.1717	22.4225	14.7878	33.8923	33.0115	19.3441	19.963	20.911	HDAC4	-0.519342	0.0452791	1	-0.259559	0.315359	1	-0.181953	0.48292	1	-0.441731	0.0892031	1	1.70185	NA
ENSG00000068028	RASSF1	15.6796	16.2691	15.1885	7.53007	8.0223	8.04555	15.4076	14.9257	13.8516	12.3327	12.4359	12.9802	RASSF1	-1.00074	1.78294e-18	2.16931e-14	-0.0944166	0.406336	1	0.679861	2.32832e-09	3.11436e-05	-0.22648	0.0436748	1	2.39873	NA
ENSG00000068078	FGFR3	349.195	350.186	349.238	97.4966	100.187	100.699	165.305	343.198	337.235	74.5677	72.1452	71.1997	FGFR3	-1.81357	5.62153e-14	6.57382e-10	-0.310112	0.185354	1	-0.45357	0.0533694	1	-1.95702	6.95323e-16	8.33136e-12	6.31069	NA
ENSG00000068079	IFI35	22.6696	21.083	20.6531	19.0395	17.8265	19.4032	71.0468	19.7557	18.7717	13.9168	14.6912	14.1649	IFI35	-0.195129	0.649934	1	0.766803	0.0754306	1	-0.396372	0.356846	1	-1.35831	0.00185585	1	-1.77139	NA
ENSG00000068097	HEATR6	22.5197	22.0954	21.7529	36.8067	37.7757	36.6019	10.0916	23.1384	21.2738	37.3479	36.8073	38.3057	HEATR6	0.745189	0.00300992	1	-0.282718	0.258822	1	0.0164831	0.94783	1	1.04439	3.48242e-05	0.312512	-3.69412	NA
ENSG00000068120	COASY	172.946	177.401	174.231	106.442	108.682	109.841	257.202	224.316	224.089	109.515	107.187	108.066	COASY	-0.691021	2.87808e-10	3.18028e-06	0.427617	8.92831e-05	1	-0.000874037	0.99405	1	-1.11951	3.28581e-24	4.12994e-20	-2.61802	NA
ENSG00000068137	PLEKHH3	17.7597	18.0074	18.0926	21.1622	21.7263	21.4349	49.9735	27.8674	27.1006	24.5648	23.8675	24.6046	PLEKHH3	0.256516	0.23709	1	0.962207	1.02132e-05	0.132139	0.183525	0.395928	1	-0.522181	0.0156665	1	-0.542691	NA
ENSG00000068305	MEF2A	26.3989	24.6934	26.8739	76.2558	74.5106	74.837	7.15945	33.9091	35.228	85.7116	87.3967	88.4969	MEF2A	1.53394	0.000596276	1	-0.0305753	0.944192	1	0.213681	0.624851	1	1.77819	7.7108e-05	0.669452	-58.1578	NA
ENSG00000068308	OTUD5	64.9283	64.9812	63.4254	97.6206	99.8187	99.1607	93.5505	63.3436	64.7486	89.6513	86.7624	83.7022	OTUD5	0.61766	8.78859e-05	0.792819	0.196544	0.210906	1	-0.189424	0.226888	1	0.231691	0.140774	1	1.17883	NA
ENSG00000068323	TFE3	35.9563	36.69	36.1708	54.0502	57.1249	54.7177	41.1294	40.035	40.4168	57.7761	57.8381	56.9549	TFE3	0.608779	6.11191e-09	6.5593e-05	0.159999	0.128569	1	0.0569435	0.583095	1	0.505721	1.30749e-06	0.0129473	3.16078	NA
ENSG00000068354	TBC1D25	9.88894	10.3854	10.2393	16.2	16.0129	16.003	13.5243	10.1798	9.63681	16.7958	16.4955	16.1163	TBC1D25	0.661598	4.4792e-06	0.0436184	0.123884	0.391352	1	0.0352908	0.805266	1	0.572999	7.39362e-05	0.64295	4.62529	NA
ENSG00000068366	ACSL4	456.763	465.834	454.579	183.99	183.106	174.121	81.8457	318.964	327.781	153.002	151.659	158.884	ACSL4	-1.34758	0.000754051	1	-0.918532	0.0204689	1	-0.223538	0.569883	1	-0.652582	0.0983667	1	0.710462	NA
ENSG00000068383	INPP5A	37.8677	38.6576	40.3981	24.0154	24.3989	23.8475	15.8844	39.3282	37.5789	23.7521	22.176	23.7962	INPP5A	-0.694951	0.0121595	1	-0.332826	0.227648	1	-0.051636	0.852378	1	-0.413757	0.135183	1	1.24316	NA
ENSG00000068394	GPKOW	18.4156	19.1345	18.6254	22.4716	24.4944	24.6094	26.7548	19.032	17.378	25.226	23.9521	24.6325	GPKOW	0.350031	0.0321427	1	0.167195	0.305682	1	0.0444334	0.785417	1	0.227266	0.165938	1	1.35929	NA
ENSG00000068400	GRIPAP1	27.2984	29.1635	27.0458	52.3824	51.2206	52.7989	23.918	24.451	25.6397	51.1228	48.4644	50.3065	GRIPAP1	0.906112	9.6072e-17	1.15527e-12	-0.173812	0.114343	1	-0.0613364	0.567991	1	1.01859	1.40585e-20	1.73847e-16	-5.86029	NA
ENSG00000068438	FTSJ1	22.6509	22.6494	23.437	18.0057	17.8401	17.7101	32.0469	21.5396	19.4434	17.0437	16.7774	16.4508	FTSJ1	-0.360613	0.0419043	1	0.0855121	0.626602	1	-0.091453	0.606807	1	-0.537577	0.00242563	1	-6.28656	NA
ENSG00000068489	PRR11	61.3302	62.4787	59.8682	26.7033	26.6897	25.1878	119.415	48.8031	50.8111	33.5461	34.9326	33.6922	PRR11	-1.22585	4.83738e-05	0.444893	0.253605	0.393558	1	0.37911	0.203533	1	-1.10035	0.000252862	1	-4.33883	NA
ENSG00000068650	ATP11A	136.834	139.196	136.322	134.244	130.049	124.627	38.9363	153.7	152.655	115.438	112.924	114.659	ATP11A	-0.0844164	0.829315	1	-0.255939	0.513335	1	-0.181225	0.64347	1	-0.0097015	0.980567	1	0.0379055	NA
ENSG00000068654	POLR1A	110.242	115.814	111.422	66.111	67.9245	63.3947	82.2033	114.37	114.42	58.699	59.008	57.8748	POLR1A	-0.773702	8.32108e-08	0.000867889	-0.117477	0.412312	1	-0.169289	0.239267	1	-0.825513	1.1359e-08	0.000121314	7.02701	NA
ENSG00000068697	LAPTM4A	312.577	304.32	305.212	284.032	284.952	290.167	151.55	292.98	302.811	260.832	271.063	269.887	LAPTM4A	-0.102036	0.6479	1	-0.303056	0.175226	1	-0.0997112	0.65538	1	0.10131	0.65004	1	-0.334294	NA
ENSG00000068724	TTC7A	55.4459	55.3725	53.3209	40.9005	41.0619	41.0462	52.8342	58.6819	57.4608	34.772	33.4666	34.3194	TTC7A	-0.416377	0.000116917	1	0.0424147	0.697003	1	-0.262518	0.0153074	1	-0.721308	3.11095e-11	3.51226e-07	-17.0061	NA
ENSG00000068745	IP6K2	52.2788	51.571	53.0116	97.5793	96.4234	97.9896	86.5181	54.0706	53.8841	95.6709	95.3608	93.0964	IP6K2	0.896808	6.81022e-07	0.00687424	0.309471	0.0848162	1	-0.0394002	0.825913	1	0.547936	0.00230756	1	1.77056	NA
ENSG00000068784	SRBD1	19.4089	20.7391	19.4674	19.1635	18.5764	19.1069	14.6686	20.2101	22.8522	21.5894	21.3444	22.6114	SRBD1	-0.0686539	0.668289	1	-0.0440963	0.779258	1	0.205723	0.195999	1	0.181163	0.253488	1	-4.10836	NA
ENSG00000068796	KIF2A	19.4276	21.2167	20.5328	31.5413	31.7759	29.8014	12.6662	29.0791	30.2743	40.5437	39.4573	39.6438	KIF2A	0.606808	0.0237859	1	0.237005	0.378544	1	0.36192	0.175493	1	0.731717	0.00637012	1	3.08735	NA
ENSG00000068878	PSME4	158.759	159.387	157.15	177.304	169.484	165.317	71.8097	161.105	161.79	179.147	179.441	183.151	PSME4	0.107635	0.673716	1	-0.267857	0.294792	1	0.0811689	0.750787	1	0.456662	0.0744292	1	-1.70487	NA
ENSG00000068885	IFT80	9.17682	8.62797	9.08795	12.8919	13.1221	12.5181	5.53842	8.66515	8.61249	12.5806	12.9574	13.0499	IFT80	0.520225	0.00198273	1	-0.232483	0.169558	1	0.0020648	0.992489	1	0.75478	7.47534e-06	0.070754	-3.2466	NA
ENSG00000068903	SIRT2	22.0699	22.4011	22.3888	29.3635	30.9441	30.3235	59.8904	20.0586	19.561	29.1519	29.1111	29.7059	SIRT2	0.439372	0.230552	1	0.573465	0.117961	1	-0.0430569	0.906639	1	-0.177156	0.627599	1	-0.308922	NA
ENSG00000068912	ERLEC1	94.3876	96.9975	95.7667	106.87	105.478	105.735	61.7498	79.4829	80.2477	97.2826	100.28	100.985	ERLEC1	0.147633	0.245363	1	-0.374126	0.0033196	1	-0.0914663	0.471226	1	0.430294	0.000725966	1	-1.15013	NA
ENSG00000068971	PPP2R5B	7.07795	7.13795	6.87115	19.3014	19.5582	19.7277	14.5732	8.04246	7.92401	26.204	28.0116	28.3539	PPP2R5B	1.47823	2.32124e-11	2.61674e-07	0.532092	0.0154647	1	0.495663	0.0210733	1	1.44177	5.87835e-11	6.60257e-07	2.70963	NA
ENSG00000069011	PITX1	24.9184	25.8396	26.6162	25.8349	27.1125	28.3482	126.376	30.6106	29.2668	26.6311	25.0938	24.4234	PITX1	0.0713976	0.879495	1	1.26794	0.00772311	1	-0.0944706	0.840721	1	-1.29102	0.00669665	1	-1.0182	NA
ENSG00000069020	MAST4	16.4292	17.0905	16.2711	17.3579	17.7583	16.8213	13.9296	13.6803	14.7416	16.2172	15.3819	16.1442	MAST4	0.0611899	0.572432	1	-0.233407	0.0327428	1	-0.12171	0.255334	1	0.172894	0.111573	1	-0.740737	NA
ENSG00000069248	NUP133	63.1667	64.3699	64.6283	61.8518	59.6475	60.587	35.5989	69.9238	67.8719	67.4737	65.3088	67.98	NUP133	-0.0777627	0.723383	1	-0.147713	0.500503	1	0.140934	0.520728	1	0.210884	0.336103	1	-1.42767	NA
ENSG00000069275	NUCKS1	283.83	292.534	285.999	224.762	223.482	221.09	427.243	297.355	302.307	253.173	259.223	258.597	NUCKS1	-0.365611	0.0155914	1	0.251811	0.095461	1	0.204018	0.176754	1	-0.413405	0.00624678	1	-1.64172	NA
ENSG00000069329	VPS35	225.999	228.195	222.932	160.13	157.798	162.651	302.686	224.013	221.218	170.896	174.071	173.519	VPS35	-0.494727	0.000396985	1	0.143267	0.303658	1	0.109553	0.431926	1	-0.528442	0.000154671	1	-3.6885	NA
ENSG00000069345	DNAJA2	112.134	111.573	115.374	110.674	114.164	111.054	92.1201	126.117	125.922	119.13	120.493	119.858	DNAJA2	-0.0136483	0.921614	1	0.0218613	0.875866	1	0.0979397	0.477833	1	0.0624299	0.650197	1	2.85573	NA
ENSG00000069399	BCL3	21.5827	22.0381	23.3339	5.20061	6.23601	5.94333	46.4454	24.8381	25.7573	4.85293	5.2753	4.79854	BCL3	-1.9513	2.43436e-16	2.91514e-12	0.534735	0.0196275	1	-0.220795	0.348994	1	-2.70682	1.29583e-28	1.65556e-24	-5.06199	NA
ENSG00000069424	KCNAB2	19.2402	20.9493	18.9003	6.85466	6.86326	7.39654	25.0145	20.8832	19.3091	5.0871	4.90881	5.2585	KCNAB2	-1.48854	4.78683e-27	6.06587e-23	0.140669	0.293042	1	-0.471242	0.000885176	1	-2.10043	2.50716e-50	3.30795e-46	-14.9318	NA
ENSG00000069493	CLEC2D	2.82397	2.43866	2.55783	2.52657	2.29526	2.21859	3.72669	3.31343	3.57485	3.15861	3.41467	3.2096	CLEC2D	-0.153149	0.298787	1	0.441687	0.00222952	1	0.479471	0.000564938	1	-0.115455	0.395785	1	-0.261397	NA
ENSG00000069509	FUNDC1	9.36422	9.16284	9.4832	15.1663	14.772	14.6485	9.8532	7.82368	7.40346	12.4567	12.7178	13.9977	FUNDC1	0.672268	9.09793e-07	0.00913796	-0.165066	0.249129	1	-0.18721	0.164493	1	0.650132	2.77004e-06	0.0269276	-3.93862	NA
ENSG00000069535	MAOB	40.1353	42.1343	41.2574	23.5054	22.8581	22.6341	34.693	42.3911	40.7862	16.1208	15.6356	15.0709	MAOB	-0.841016	2.16348e-12	2.47978e-08	-0.0666858	0.572821	1	-0.560081	3.47599e-06	0.0460256	-1.3344	4.4874e-28	5.72412e-24	20.0103	NA
ENSG00000069667	RORA	35.7314	39.3261	37.0987	36.5862	35.8803	34.8665	12.8092	42.105	40.9877	50.9575	49.2256	50.8779	RORA	-0.0634617	0.854902	1	-0.225328	0.514976	1	0.493387	0.154693	1	0.655253	0.0591464	1	-2.90799	NA
ENSG00000069696	DRD4	1.00619	1.25429	1.01123	0.486573	0.481692	0.581956	5.56226	1.02464	1.30791	0.803104	0.553249	0.644986	DRD4	-1.12307	0.050312	1	1.28747	0.0216118	1	0.388822	0.513066	1	-2.02211	0.000414626	1	-1.57061	NA
ENSG00000069702	TGFBR3	312.446	312.362	311.003	88.1512	85.4874	81.3976	147.116	236.753	235.877	63.4514	64.9	64.147	TGFBR3	-1.87588	1.98757e-25	2.50374e-21	-0.594394	0.000671952	1	-0.406026	0.0203182	1	-1.68751	4.44968e-21	5.51716e-17	2.83904	NA
ENSG00000069849	ATP1B3	104.882	104.581	102.039	89.7363	91.0099	91.0904	62.751	81.7717	81.6079	80.6011	80.0106	82.5732	ATP1B3	-0.196552	0.125708	1	-0.461601	0.000335167	1	-0.160742	0.210429	1	0.10431	0.416053	1	-0.225974	NA
ENSG00000069869	NEDD4	24.9559	26.7183	26.5818	38.1024	36.9166	35.4873	11.1405	32.832	35.1777	40.1856	41.5012	43.4071	NEDD4	0.498334	0.134555	1	0.0173405	0.960429	1	0.179016	0.589858	1	0.660007	0.0476207	1	38.0616	NA
ENSG00000069943	PIGB	6.34709	6.37384	6.11503	12.9333	12.3176	11.7703	2.98769	6.84758	6.81573	11.6853	11.6184	10.9174	PIGB	0.978316	0.000165907	1	-0.172996	0.506189	1	-0.113768	0.657644	1	1.03755	6.45661e-05	0.56463	-5.99757	NA
ENSG00000069956	MAPK6	169.385	169.55	168.303	141.163	138.613	134.602	69.9741	189.984	192.151	158.636	159.496	162.006	MAPK6	-0.291769	0.337268	1	-0.16584	0.585119	1	0.212545	0.484353	1	0.0866154	0.775417	1	-0.522284	NA
ENSG00000069966	GNB5	14.5552	14.6262	15.9961	23.2298	21.849	23.3114	29.973	14.1347	13.9188	18.8345	18.6098	18.1234	GNB5	0.599076	0.023554	1	0.359732	0.173257	1	-0.299975	0.254859	1	-0.0606349	0.816571	1	-0.168556	NA
ENSG00000069974	RAB27A	9.64532	9.25836	9.27698	15.1249	15.3993	15.2129	14.3587	10.7183	10.8291	12.6082	13.479	13.1475	RAB27A	0.700471	6.03009e-07	0.00609702	0.346618	0.0142507	1	-0.22174	0.10837	1	0.132105	0.353418	1	0.381125	NA
ENSG00000070010	UFD1	24.3187	24.4642	24.8977	22.1133	21.7263	23.777	18.006	19.7052	19.4266	18.6278	18.1306	17.8446	UFD1	-0.124178	0.252583	1	-0.366301	0.000817367	1	-0.308781	0.00440143	1	-0.0666486	0.548336	1	0.18195	NA
ENSG00000070018	LRP6	58.1444	59.3841	56.6203	63.7815	59.7294	58.2732	22.0347	54.2558	53.2292	60.4622	59.4591	60.3558	LRP6	0.0619443	0.823551	1	-0.426701	0.124449	1	-0.0120163	0.965725	1	0.476632	0.0861489	1	-1.11702	NA
ENSG00000070047	PHRF1	72.3868	72.3167	70.746	63.1061	64.5019	65.9766	51.4277	71.7078	72.0532	56.0818	55.9774	58.516	PHRF1	-0.154445	0.284583	1	-0.141808	0.325234	1	-0.182643	0.205639	1	-0.195279	0.177356	1	1.37707	NA
ENSG00000070061	ELP1	345.279	339.966	334.442	93.2236	90.1645	90.3144	262.137	298.045	295.557	78.039	79.2212	79.3953	ELP1	-1.89778	7.79989e-65	1.03715e-60	-0.252789	0.019179	1	-0.209897	0.053341	1	-1.85489	4.4066e-62	5.84712e-58	7.33769	NA
ENSG00000070081	NUCB2	34.4758	34.474	34.7444	55.8559	55.5977	54.1251	52.5004	23.7947	24.6658	48.8913	50.0573	50.6967	NUCB2	0.675644	0.0112492	1	-0.0396863	0.883694	1	-0.146056	0.581933	1	0.569275	0.0327498	1	-14.3444	NA
ENSG00000070087	PFN2	83.0686	85.02	86.4355	123.121	124.622	128.042	75.9814	69.8397	74.0515	117.559	114.672	116.039	PFN2	0.562241	6.35681e-08	0.000665367	-0.211449	0.0426744	1	-0.109722	0.288632	1	0.663969	1.91314e-10	2.12914e-06	-3.1401	NA
ENSG00000070159	PTPN3	22.8008	23.0315	22.406	41.3829	40.1483	39.2262	10.4492	22.2632	22.3653	41.0809	41.2616	40.285	PTPN3	0.824297	0.000698843	1	-0.307677	0.204049	1	0.0221839	0.927172	1	1.15416	2.35966e-06	0.0230303	-3.75121	NA
ENSG00000070214	SLC44A1	129.188	128.307	130.033	104.995	104.905	101.813	101.441	122.499	121.691	88.935	88.9049	88.1066	SLC44A1	-0.314162	0.00627648	1	-0.164745	0.151503	1	-0.229157	0.0462225	1	-0.378573	0.00101437	1	2.29793	NA
ENSG00000070269	TMEM260	12.625	12.7542	12.5592	12.3544	11.6085	10.8673	5.70529	15.0266	15.7659	12.925	12.8729	13.7747	TMEM260	-0.1236	0.685148	1	-0.0537437	0.858271	1	0.184595	0.543566	1	0.114736	0.703684	1	-2.13488	NA
ENSG00000070366	SMG6	21.3016	22.6685	19.8111	31.2243	30.0033	28.0519	4.65639	22.4652	20.5349	27.0305	26.6866	27.434	SMG6	0.4858	0.257954	1	-0.419965	0.327836	1	-0.137865	0.747767	1	0.767908	0.0745424	1	-1.8285	NA
ENSG00000070367	EXOC5	53.9467	54.6657	53.2865	80.4323	78.5604	77.1226	25.0145	54.7102	58.1829	84.8851	84.2816	85.2911	EXOC5	0.544654	0.034296	1	-0.230817	0.36862	1	0.107974	0.673819	1	0.883445	0.000629208	1	-3.82748	NA
ENSG00000070371	CLTCL1	11.8754	11.4743	11.2532	12.6576	13.2039	13.1389	11.7603	10.8193	10.8458	13.0765	12.5064	13.1196	CLTCL1	0.173182	0.116834	1	-0.0517255	0.654663	1	-0.0110508	0.922412	1	0.213858	0.0545869	1	-4.13448	NA
ENSG00000070404	FSTL3	36.5185	36.8428	36.8066	10.9347	11.6358	12.2923	94.647	35.1713	34.5228	10.7486	11.562	9.77444	FSTL3	-1.66248	1.68575e-06	0.0167142	0.57682	0.0887691	1	-0.120108	0.724876	1	-2.35941	3.06449e-11	3.46042e-07	-4.09037	NA
ENSG00000070413	DGCR2	95.1184	99.2325	98.6365	113.169	113.345	112.818	79.5095	112.233	113.597	101.084	99.9278	99.3407	DGCR2	0.211917	0.146719	1	0.0600612	0.682573	1	-0.176089	0.227442	1	-0.0242333	0.869832	1	-0.403476	NA
ENSG00000070423	RNF126	90.5459	91.0374	91.8486	46.4554	50.2797	50.2311	247.595	96.1944	94.9241	57.7899	55.4418	54.8642	RNF126	-0.896104	0.00539586	1	0.682054	0.0335124	1	0.193913	0.54443	1	-1.38425	2.08509e-05	0.190786	-2.02953	NA
ENSG00000070444	MNT	15.8857	15.7342	15.1885	18.2814	19.0537	18.8106	18.4113	26.235	27.3525	24.5373	23.5856	22.1236	MNT	0.262944	0.0949046	1	0.624088	7.74436e-05	0.985005	0.323721	0.0380464	1	-0.0374379	0.816478	1	-0.0599882	NA
ENSG00000070476	ZXDC	34.1385	34.3021	33.5759	31.1692	30.1669	29.3923	22.0347	48.3655	49.5517	39.6897	38.5129	40.2013	ZXDC	-0.169324	0.505757	1	0.234666	0.357254	1	0.384424	0.130578	1	-0.0195716	0.940521	1	-0.0834016	NA
ENSG00000070495	JMJD6	49.7864	51.1317	50.7089	58.2956	58.0522	59.7264	115.244	39.4796	40.9038	63.782	64.3644	62.9483	JMJD6	0.215774	0.536826	1	0.367311	0.293215	1	0.118163	0.735069	1	-0.0333766	0.92358	1	-0.0908674	NA
ENSG00000070501	POLB	11.0133	10.6147	11.1501	14.4219	14.7175	13.7879	16.1943	12.2498	12.0381	15.3907	14.9167	15.1546	POLB	0.390004	0.00547932	1	0.301659	0.0322846	1	0.0829077	0.550801	1	0.171243	0.225753	1	0.567668	NA
ENSG00000070540	WIPI1	8.85824	8.60886	8.86455	22.003	21.8218	21.3643	5.91984	9.28783	9.2338	21.4104	20.555	20.2698	WIPI1	1.3107	6.75134e-15	7.96861e-11	-0.10255	0.539516	1	-0.066993	0.683443	1	1.34626	1.28435e-15	1.53556e-11	-13.1278	NA
ENSG00000070610	GBA2	49.3366	49.7563	48.0796	52.3272	50.3888	52.1217	43.9662	51.5631	51.9698	52.6105	51.7769	52.1184	GBA2	0.0733228	0.52343	1	0.00399624	0.976315	1	0.0154777	0.893212	1	0.0848041	0.458372	1	21.221	NA
ENSG00000070614	NDST1	97.6858	99.1179	97.4336	61.328	59.8112	58.9645	44.9198	111.055	112.186	58.9883	57.683	56.6762	NDST1	-0.708428	0.0121519	1	-0.13359	0.634407	1	-0.055189	0.844704	1	-0.630025	0.0256481	1	4.7161	NA
ENSG00000070669	ASNS	0.406509	0.37556	0.409769	0.403871	0.481692	0.356214	3.86972	3.86879	3.84352	2.85557	2.59712	2.48482	ASNS	0.064314	0.878451	1	3.37871	8.31285e-67	1.1229e-62	2.76642	3.08138e-50	4.15986e-46	-0.549929	9.80887e-05	0.842154	-0.162763	Dox.only
ENSG00000070718	AP3M2	10.0389	9.79324	10.0847	9.52871	10.1086	9.72451	8.44673	9.33832	9.35135	9.72924	10.0255	9.76051	AP3M2	-0.0271818	0.813929	1	-0.138759	0.223829	1	0.0074797	0.950887	1	0.119062	0.290484	1	-0.858044	NA
ENSG00000070756	PABPC1	1278.79	1285.5	1291.93	730.226	729.398	725.694	1658.82	1320.8	1340.46	746.287	740.548	739.476	PABPC1	-0.81937	1.15184e-10	1.28292e-06	0.163842	0.194549	1	0.0268134	0.831931	1	-0.956398	6.08739e-14	7.14295e-10	-5.83732	NA
ENSG00000070759	TESK2	15.436	14.9319	14.7073	14.4357	14.5675	13.7879	7.82693	14.4208	15.4805	16.6856	15.4242	15.6145	TESK2	-0.0751321	0.731818	1	-0.254284	0.243293	1	0.157724	0.469292	1	0.336879	0.121576	1	-1.32482	NA
ENSG00000070761	CFAP20	47.2377	44.3502	46.8252	30.7005	30.2078	31.0712	70.9515	40.5904	41.1724	33.3119	34.0023	33.7062	CFAP20	-0.590081	0.00388964	1	0.141049	0.48773	1	0.135389	0.507005	1	-0.595744	0.00352964	1	-4.22365	NA
ENSG00000070770	CSNK2A2	124.503	126.32	123.485	134.837	136.458	135.674	181.801	163.73	165.669	180.152	180.668	182.426	CSNK2A2	0.120731	0.248273	1	0.449595	1.761e-05	0.22694	0.416765	6.59788e-05	0.864652	0.087899	0.400115	1	0.195507	NA
ENSG00000070778	PTPN21	6.85307	6.50756	7.11173	17.4406	16.3674	17.4703	2.53476	6.32587	6.54706	18.0493	19.1877	17.6216	PTPN21	1.32835	3.09592e-06	0.0303462	-0.406497	0.151066	1	0.0975376	0.727003	1	1.8324	2.10951e-10	2.34599e-06	-4.50779	NA
ENSG00000070785	EIF2B3	18.3407	17.6445	17.474	15.373	15.0993	16.144	25.0384	17.3659	18.1504	13.9168	14.0005	14.6249	EIF2B3	-0.197943	0.195188	1	0.17772	0.242586	1	-0.132178	0.387163	1	-0.507842	0.000875181	1	-2.85753	NA
ENSG00000070814	TCOF1	116.426	116.864	114.034	34.4911	33.085	32.7502	139.487	114.168	118.786	37.5959	37.9209	39.0584	TCOF1	-1.79248	1.58984e-49	2.09319e-45	0.100428	0.391584	1	0.191748	0.106578	1	-1.70116	4.43327e-45	5.82132e-41	-16.9391	NA
ENSG00000070882	OSBPL3	26.6425	24.1967	24.365	15.4971	14.1312	13.8584	9.59098	24.0808	24.0781	11.8368	11.8157	12.0185	OSBPL3	-0.791476	0.00604776	1	-0.380008	0.184825	1	-0.286482	0.319529	1	-0.697938	0.015672	1	1.83664	NA
ENSG00000070915	SLC12A3	1.66209	2.43866	1.76735	0.155763	0.195339	0.172798	0.270095	0.300979	0.300384	0.141909	0.116284	0.185029	SLC12A3	-3.73047	4.28813e-34	5.53468e-30	-2.87282	9.82773e-23	1.32252e-18	-0.296486	0.553329	1	-1.15185	0.00758393	1	0.400948	NA
ENSG00000070950	RAD18	22.0137	21.2358	20.4813	4.99386	5.59513	4.98393	14.7401	19.1498	19.6113	6.76764	6.88221	6.27598	RAD18	-2.03899	5.27872e-43	6.90562e-39	-0.25048	0.0767947	1	0.357277	0.0166552	1	-1.43124	1.41546e-22	1.76762e-18	5.71399	NA
ENSG00000070961	ATP2B1	62.4171	61.0269	62.7037	70.5907	67.9927	67.966	43.847	66.7768	68.4093	73.8101	72.3143	76.8307	ATP2B1	0.150099	0.364853	1	-0.0554991	0.736589	1	0.110313	0.504827	1	0.315911	0.0562537	1	-5.69218	NA
ENSG00000071051	NCK2	40.3976	39.5363	39.5389	39.6462	39.5892	41.1591	26.2303	44.5957	45.6224	41.7559	42.7275	41.177	NCK2	0.0110944	0.95466	1	-0.035951	0.849943	1	0.0618087	0.747279	1	0.108854	0.568543	1	-3.02784	NA
ENSG00000071054	MAP4K4	505.449	513.19	501.287	301.91	297.102	289.602	530.154	536.853	541.343	307.625	308.163	308.398	MAP4K4	-0.774429	1.41906e-13	1.6508e-09	0.0815965	0.433254	1	0.0566323	0.586785	1	-0.799393	2.3391e-14	2.75663e-10	-9.7969	NA
ENSG00000071073	MGAT4A	89.4215	93.7882	95.423	85.7804	85.5692	80.5934	29.5915	85.8444	87.5355	67.6114	69.171	68.5932	MGAT4A	-0.145317	0.651384	1	-0.456881	0.156004	1	-0.294951	0.359285	1	0.0166158	0.958541	1	-0.0363678	NA
ENSG00000071082	RPL31	599.468	575.809	610.168	443.744	449.141	456.849	1649.16	560.027	541.763	428.927	443.637	438.887	RPL31	-0.403632	0.267103	1	0.62364	0.0870906	1	-0.0415148	0.90901	1	-1.06879	0.0036029	1	-1.71379	NA
ENSG00000071127	WDR1	278.639	277.156	274.898	219.662	218.737	224.095	258.537	230.139	234.383	216.119	215.71	215.724	WDR1	-0.326448	0.00217673	1	-0.200347	0.060039	1	-0.0329124	0.757254	1	-0.159013	0.135227	1	0.793686	NA
ENSG00000071189	SNX13	28.3853	28.2465	29.1423	47.627	44.9481	43.2472	13.6435	28.9108	28.7127	46.0399	44.87	46.1529	SNX13	0.663649	0.00607527	1	-0.266184	0.269867	1	0.0131234	0.956937	1	0.942959	0.000102856	0.881066	-3.54251	NA
ENSG00000071243	ING3	5.22269	6.20191	5.59949	10.7279	10.8313	10.6416	5.06165	7.67222	7.42025	13.173	12.8447	13.4541	ING3	0.923327	3.12606e-08	0.000329236	0.250858	0.145635	1	0.294468	0.0690663	1	0.966915	4.54416e-09	4.91178e-05	3.85444	NA
ENSG00000071246	VASH1	0.462729	0.547485	0.323846	13.4295	13.3812	14.0842	0.174741	0.317808	0.216423	7.12579	6.9104	6.38749	VASH1	5.04576	6.03613e-135	8.13369e-131	-0.953717	0.00344654	1	-1.00481	1.18788e-11	1.59343e-07	4.99564	1.85532e-104	2.49096e-100	-5.23807	NA
ENSG00000071282	LMCD1	10.0763	10.4618	10.9267	2.16819	1.98163	2.00695	7.9938	7.04953	7.55459	1.7949	2.16016	1.81579	LMCD1	-2.37069	1.55672e-61	2.06499e-57	-0.481529	0.000242932	1	-0.0952988	0.566026	1	-1.98441	2.57058e-42	3.36618e-38	4.12107	NA
ENSG00000071462	BUD23	36.2561	36.881	36.566	33.7881	33.7667	34.4715	65.1349	35.7267	34.9594	34.6894	36.3281	34.877	BUD23	-0.104752	0.63407	1	0.307379	0.161806	1	0.0537309	0.807259	1	-0.358403	0.10271	1	-1.166	NA
ENSG00000071537	SEL1L	99.3162	102.977	104.84	123.382	121.159	117.234	28.1612	118.779	120.146	123.662	123.637	122.492	SEL1L	0.236293	0.56351	1	-0.201402	0.622323	1	0.0316199	0.938433	1	0.469316	0.251845	1	-2.33024	NA
ENSG00000071539	TRIP13	40.3976	42.077	38.9718	7.03385	7.53141	7.45298	20.2707	29.2811	28.5616	7.35996	7.883	8.074	TRIP13	-2.4683	4.24175e-52	5.59657e-48	-0.635547	3.75444e-05	0.481057	0.0829763	0.606559	1	-1.74977	7.07873e-28	9.02255e-24	2.75317	NA
ENSG00000071553	ATP6AP1	126.395	129.663	128.881	189.751	187.402	194.057	197.749	135.356	131.413	177.012	179.019	179.903	ATP6AP1	0.569494	0.000364942	1	0.270828	0.0894094	1	-0.0919813	0.563433	1	0.206685	0.194978	1	0.763161	NA
ENSG00000071564	TCF3	130.631	132.49	133.538	85.6288	89.96	89.6231	118.724	127.278	124.428	90.9461	86.8752	84.3015	TCF3	-0.580925	3.07164e-08	0.000323598	-0.0985962	0.345837	1	-0.0169018	0.872243	1	-0.49923	1.94645e-06	0.0190849	5.06338	NA
ENSG00000071575	TRIB2	4.49183	4.7501	4.80901	3.75332	3.63157	3.41784	1.79576	4.97953	5.42199	2.77292	2.76627	2.86114	TRIB2	-0.382064	0.237363	1	-0.199344	0.535347	1	-0.366377	0.259404	1	-0.54905	0.0929265	1	2.75429	NA
ENSG00000071626	DAZAP1	168.167	166.188	166.24	115.264	119.782	121.058	214.96	164.42	160.178	124.75	123.256	121.642	DAZAP1	-0.491454	0.000247207	1	0.107871	0.419617	1	0.053871	0.687489	1	-0.545455	4.76109e-05	0.422214	-5.05653	NA
ENSG00000071655	MBD3	47.4626	43.758	46.344	59.8669	60.8475	62.5764	91.9533	41.1794	42.7005	53.2029	52.1011	51.5888	MBD3	0.414251	0.12575	1	0.353666	0.19091	1	-0.224473	0.405971	1	-0.163889	0.543596	1	-0.463402	NA
ENSG00000071794	HLTF	41.8594	42.822	43.3023	52.5616	51.6569	49.314	16.8856	46.5311	45.8407	59.1812	60.0934	60.1049	HLTF	0.26275	0.389105	1	-0.227658	0.455171	1	0.22459	0.461169	1	0.714999	0.0194928	1	-3.14068	NA
ENSG00000071859	FAM50A	36.6496	35.8876	35.1741	39.0397	41.4437	42.443	121.871	37.4264	35.2448	43.5466	44.1089	41.9854	FAM50A	0.190775	0.633214	1	0.853039	0.0338307	1	0.0767818	0.847729	1	-0.585488	0.143599	1	-0.686355	NA
ENSG00000071889	FAM3A	18.8467	18.9053	19.1237	25.2284	24.2898	27.0784	55.0512	22.2801	20.3502	26.7964	26.8558	27.2668	FAM3A	0.430042	0.180761	1	0.780225	0.015509	1	0.0792925	0.80493	1	-0.270902	0.397401	1	-0.34721	NA
ENSG00000071894	CPSF1	161.514	161.45	157.872	137.139	138.408	144.366	203.041	168.258	163.201	136.348	134.11	130.241	CPSF1	-0.195492	0.102793	1	0.152421	0.203106	1	-0.0675772	0.572738	1	-0.415491	0.000531348	1	-2.72594	NA
ENSG00000071967	CYBRD1	0.612649	0.547485	0.615983	2.45765	2.10436	2.10571	0.293934	0.385125	0.216423	1.85	1.77957	1.77397	CYBRD1	1.96164	2.70198e-23	3.37667e-19	-1.06394	0.000239284	1	-0.307932	0.0562968	1	2.71852	4.25366e-31	5.46553e-27	-2.55515	NA
ENSG00000071994	PDCD2	77.2592	75.9462	76.0217	61.2453	62.5929	64.467	118.033	86.1136	86.8806	67.8456	65.6753	68.8999	PDCD2	-0.283829	0.0453585	1	0.343972	0.0152144	1	0.10434	0.461646	1	-0.523463	0.000224174	1	-1.52182	NA
ENSG00000072042	RDH11	50.536	48.4764	47.9593	67.5996	67.5972	66.4281	79.5095	44.074	45.0514	72.653	73.3292	72.7607	RDH11	0.456383	0.0297808	1	0.197697	0.345723	1	0.117612	0.574424	1	0.376296	0.073239	1	1.90339	NA
ENSG00000072062	PRKACA	66.0152	62.7462	69.3369	129.351	132.695	135.66	90.0462	70.2436	67.5193	116.815	118.266	117.321	PRKACA	1.00576	9.72794e-14	1.13467e-09	0.201002	0.134141	1	-0.174518	0.191275	1	0.630235	2.75691e-06	0.0268054	3.13547	NA
ENSG00000072071	ADGRL1	3.18003	3.3938	3.38269	4.37359	4.08155	3.6718	5.63378	3.65001	4.28012	3.26881	3.47105	3.27929	ADGRL1	0.286871	0.110687	1	0.441264	0.0141819	1	-0.277959	0.118304	1	-0.43237	0.0142617	1	-0.979844	NA
ENSG00000072110	ACTN1	372.433	372.402	368.897	223.88	219.2	227.721	227.38	286.719	285.28	213.309	211.227	207.891	ACTN1	-0.731523	3.62819e-09	3.91373e-05	-0.478325	0.000109137	1	-0.0849964	0.491091	1	-0.338194	0.00621096	1	0.707037	NA
ENSG00000072121	ZFYVE26	30.8403	31.4176	30.4827	40.1286	37.1757	35.4873	18.0537	34.9189	35.7486	38.7805	39.3727	40.3825	ZFYVE26	0.282653	0.208365	1	-0.0627484	0.778835	1	0.0717115	0.749381	1	0.417113	0.0631005	1	-6.64739	NA
ENSG00000072134	EPN2	16.1856	16.8613	14.6901	25.0216	24.3035	23.9321	14.311	16.2215	15.195	25.3362	24.6569	24.7579	EPN2	0.61926	6.79941e-08	0.000711422	-0.0603628	0.602421	1	0.0291528	0.79761	1	0.708776	6.842e-10	7.53646e-06	-11.7419	NA
ENSG00000072135	PTPN18	41.6345	42.7838	42.7352	17.0409	18.3037	17.8935	49.2345	38.9243	38.5529	18.4625	17.9191	15.949	PTPN18	-1.25745	4.09953e-20	5.04324e-16	-0.00604942	0.968378	1	-0.0248379	0.857502	1	-1.27624	1.22136e-20	1.5107e-16	210.969	NA
ENSG00000072163	LIMS2	3.40491	3.20277	2.88434	3.16062	2.97705	3.62947	8.49441	2.3205	1.84526	2.1806	2.0192	2.41513	LIMS2	0.0416959	0.935344	1	0.413887	0.38492	1	-0.568552	0.23493	1	-0.940724	0.0497084	1	-2.2729	NA
ENSG00000072201	LNX1	0.893749	0.967746	0.890936	1.28603	1.47711	1.27329	0.150902	0.738541	0.804148	0.885754	1.0466	0.895872	LNX1	0.568108	0.144723	1	-0.694414	0.0848989	1	-0.52755	0.172521	1	0.735386	0.063635	1	-1.059	NA
ENSG00000072210	ALDH3A2	151.657	154.994	151.084	53.0853	54.1932	54.4496	131.621	159.708	162.177	40.709	41.0501	41.2746	ALDH3A2	-1.50145	1.11118e-35	1.43764e-31	-0.0130966	0.910798	1	-0.39477	0.00090299	1	-1.88312	7.46285e-54	9.86738e-50	143.787	NA
ENSG00000072274	TFRC	529.886	533.133	525.363	253.611	248.176	239.925	199.322	485.524	489.506	360.493	354.707	359.495	TFRC	-1.09872	9.41773e-05	0.847784	-0.435645	0.117853	1	0.53505	0.0550397	1	-0.128022	0.645444	1	0.293869	NA
ENSG00000072310	SREBF1	64.1225	64.389	66.0031	29.7357	31.0123	30.394	82.8708	77.6485	73.4637	41.7835	39.3164	39.9923	SREBF1	-1.09446	5.17298e-23	6.45381e-19	0.266293	0.0147148	1	0.410277	0.000195936	1	-0.950482	6.03777e-18	7.3528e-14	-3.56931	NA
ENSG00000072364	AFF4	80.7823	83.5873	80.2491	176.064	169.498	162.495	29.8776	88.7727	90.7596	201.393	194.524	198.064	AFF4	1.05473	0.00141094	1	-0.223928	0.493561	1	0.225464	0.490381	1	1.50412	6.62941e-06	0.0630191	-6.71699	NA
ENSG00000072401	UBE2D1	14.1242	14.1296	14.6386	26.0141	27.617	27.925	9.40027	15.4474	15.4637	31.7966	31.0986	32.619	UBE2D1	0.928433	2.77526e-07	0.00284186	-0.0866147	0.628678	1	0.228164	0.200088	1	1.24321	7.17169e-12	8.18003e-08	-14.3533	NA
ENSG00000072415	MPP5	32.6768	34.3976	32.5964	38.8605	36.1121	37.5895	18.2205	32.1589	31.4498	35.3506	34.7635	36.2708	MPP5	0.175647	0.36935	1	-0.283329	0.147619	1	-0.0814927	0.676805	1	0.377486	0.0535668	1	-1.33233	NA
ENSG00000072422	RHOBTB1	20.0085	19.4975	19.3471	11.8168	11.3358	11.4176	5.51458	12.9566	12.7098	9.2058	8.70055	8.79878	RHOBTB1	-0.769119	0.00367434	1	-0.91535	0.000564777	1	-0.373511	0.158454	1	-0.227249	0.395968	1	0.248264	NA
ENSG00000072501	SMC1A	150.345	151.479	151.255	95.7598	94.0098	91.5842	56.696	127.463	130.305	93.0537	91.4844	91.1869	SMC1A	-0.68755	0.0079641	1	-0.526681	0.0416613	1	-0.0291655	0.910194	1	-0.190033	0.462057	1	0.360813	NA
ENSG00000072506	HSD17B10	36.9307	35.391	37.5627	42.2513	43.7891	45.0955	151.764	33.5389	34.9258	33.5736	34.693	34.1104	HSD17B10	0.25526	0.597025	1	1.0033	0.0393124	1	-0.357449	0.459175	1	-1.10549	0.0234194	1	-1.10186	NA
ENSG00000072518	MARK2	40.585	39.116	39.4186	63.7264	64.6519	64.3823	71.023	48.6684	48.9136	66.2477	65.0692	63.1016	MARK2	0.694815	1.02844e-05	0.0982267	0.500658	0.00146764	1	0.0123621	0.937476	1	0.206516	0.188578	1	0.412489	NA
ENSG00000072571	HMMR	55.2585	55.4871	56.2251	20.3765	20.2673	20.3485	49.902	42.2228	43.07	24.5924	25.8268	24.6882	HMMR	-1.45425	2.48176e-35	3.20965e-31	-0.305592	0.00791307	1	0.300714	0.00976292	1	-0.847949	2.70038e-13	3.1481e-09	2.77478	NA
ENSG00000072609	CHFR	15.867	16.7658	15.6524	25.9314	26.4852	24.8351	14.4064	19.6042	19.5778	26.9479	27.476	26.4305	CHFR	0.679128	1.42428e-06	0.0141772	0.153238	0.28509	1	0.0658084	0.636662	1	0.591694	2.42112e-05	0.220394	3.86128	NA
ENSG00000072682	P4HA2	101.321	100.646	100.785	98.0341	99.0824	100.854	51.8091	84.801	84.1939	104.638	102.451	101.724	P4HA2	-0.0229761	0.896654	1	-0.454922	0.0100855	1	0.0515841	0.770062	1	0.483531	0.00622996	1	-1.06289	NA
ENSG00000072736	NFATC3	51.8478	53.7679	52.0149	64.1813	60.0293	56.4954	12.3801	58.6146	59.627	54.8145	52.7072	53.4843	NFATC3	0.197205	0.651739	1	-0.270909	0.535115	1	-0.166618	0.702862	1	0.301499	0.490007	1	-1.11291	NA
ENSG00000072756	TRNT1	11.9316	12.4294	13.0748	11.2517	12.3585	11.0084	9.30492	12.7042	13.2135	11.2032	11.1673	10.332	TRNT1	-0.113262	0.459371	1	-0.0848182	0.575214	1	-0.0824324	0.589847	1	-0.110872	0.477431	1	1.30717	NA
ENSG00000072778	ACADVL	229.203	228.979	230.459	272.729	273.471	280.29	424.382	195.067	196.332	273.174	280.522	270.863	ACADVL	0.263278	0.320954	1	0.24432	0.35693	1	-0.00337632	0.989908	1	0.0155809	0.953407	1	0.0637724	NA
ENSG00000072786	STK10	16.4667	16.4601	16.1852	36.8205	37.7757	38.3091	22.4877	17.2481	17.7306	35.874	35.5387	33.6365	STK10	1.20249	7.10058e-20	8.72093e-16	0.224628	0.0885818	1	-0.104126	0.418933	1	0.873732	2.75902e-11	3.11824e-07	3.88968	NA
ENSG00000072803	FBXW11	58.2756	58.6582	58.1669	79.4674	78.9422	76.6993	26.2303	58.3285	58.5355	81.7858	81.3074	80.5243	FBXW11	0.425335	0.0930036	1	-0.290687	0.250569	1	0.0513057	0.83925	1	0.76733	0.00253045	1	-2.63971	NA
ENSG00000072818	ACAP1	2.99263	3.79496	3.79512	1.65819	2.03618	1.65423	8.51824	2.69074	2.76883	2.99331	2.93542	2.63814	ACAP1	-0.996534	0.0140811	1	0.398879	0.317562	1	0.688744	0.0885499	1	-0.706771	0.0778994	1	-1.77189	NA
ENSG00000072832	CRMP1	3.77971	3.64214	3.27958	3.71197	3.41339	3.827	2.43941	2.47196	2.76883	3.29636	2.82265	3.19566	CRMP1	0.0347013	0.819427	1	-0.47858	0.00133604	1	-0.235248	0.0930027	1	0.278101	0.0613257	1	-0.581096	NA
ENSG00000072840	EVC	13.993	13.843	12.7483	14.5184	14.8402	14.6344	1.9388	9.52344	10.0902	10.2802	9.61677	9.87201	EVC	0.116626	0.793207	1	-0.913379	0.0409198	1	-0.564873	0.203652	1	0.465174	0.294879	1	-0.509289	NA
ENSG00000072849	DERL2	26.2677	26.2598	25.8429	27.9851	27.8352	28.2777	36.5763	27.1606	26.4793	27.9672	28.8715	29.0508	DERL2	0.101893	0.472981	1	0.201635	0.154564	1	0.0304418	0.830378	1	-0.0693028	0.621319	1	-0.343704	NA
ENSG00000072864	NDE1	52.7098	53.3094	52.7882	68.468	67.2563	65.8073	24.943	49.207	51.466	80.0777	77.9244	79.3256	NDE1	0.343903	0.133764	1	-0.337607	0.141118	1	0.235971	0.302723	1	0.917481	7.03836e-05	0.613393	-2.71761	NA
ENSG00000072954	TMEM38A	2.46791	2.40046	2.95308	3.50521	3.83611	3.5166	7.63622	3.65001	3.32297	3.73716	3.61201	3.94832	TMEM38A	0.477219	0.104224	1	0.901572	0.00209461	1	0.0576929	0.843985	1	-0.36675	0.202261	1	-0.406789	NA
ENSG00000072958	AP1M1	69.5946	70.4255	72.0005	61.1075	61.352	64.5939	100.821	70.2941	67.4857	62.129	62.5601	61.5545	AP1M1	-0.180852	0.253089	1	0.169819	0.282507	1	-0.00625693	0.968943	1	-0.356929	0.0240415	1	-2.10182	NA
ENSG00000073008	PVR	47.1815	45.2098	44.3334	41.1073	40.5847	40.8487	34.4308	46.1609	43.6409	39.2902	39.852	41.1352	PVR	-0.158092	0.235777	1	-0.137228	0.30273	1	-0.0269161	0.840649	1	-0.0477782	0.724174	1	0.348166	NA
ENSG00000073050	XRCC1	35.7126	34.5122	35.5521	34.3532	34.2167	35.3886	86.3035	34.1279	36.1348	34.7032	36.1307	34.0686	XRCC1	-0.0250455	0.934999	1	0.565495	0.0641077	1	0.0130521	0.966303	1	-0.577493	0.0585824	1	-1.02122	NA
ENSG00000073060	SCARB1	449.829	452.615	449.785	117.455	117.695	120.479	564.744	372.717	367.309	102.572	102.62	100.344	SCARB1	-1.92716	9.51602e-29	1.21196e-24	-0.0516622	0.757877	1	-0.219091	0.191676	1	-2.09459	2.75109e-33	3.5533e-29	40.5439	NA
ENSG00000073067	CYP2W1	72.4992	71.6481	74.2688	13.209	13.4766	15.0859	146.21	60.3648	59.0393	10.6108	10.0678	10.3041	CYP2W1	-2.389	1.20801e-13	1.40696e-09	0.28198	0.356958	1	-0.432115	0.161906	1	-3.10309	8.16397e-21	1.01086e-16	-11.0046	NA
ENSG00000073111	MCM2	116.145	118.335	117.849	14.863	15.4402	14.6767	10.9975	88.2341	85.6044	15.2254	15.3819	13.9698	MCM2	-2.97207	3.87192e-07	0.00394742	-0.930788	0.0896119	1	-0.0130055	0.98161	1	-2.05428	0.000279694	1	2.20703	NA
ENSG00000073150	PANX2	8.52092	9.43028	9.17387	1.32738	1.25893	1.89408	13.429	8.9849	8.66287	1.05105	1.32851	1.31402	PANX2	-2.62309	8.2282e-28	1.0449e-23	0.193979	0.375089	1	-0.284372	0.249629	1	-3.10137	1.35342e-36	1.75701e-32	-15.9882	NA
ENSG00000073169	SELENOO	21.0392	20.6818	20.8078	20.4454	21.3445	22.5918	58.8653	21.2703	19.3259	16.9335	16.9183	15.8096	SELENOO	0.0421843	0.906417	1	0.669495	0.0607587	1	-0.375118	0.292453	1	-1.00243	0.00521455	1	-1.4973	NA
ENSG00000073331	ALPK1	2.50539	2.80161	2.69531	8.46736	8.895	8.68045	1.89112	3.38074	3.8939	8.36553	9.1798	7.94855	ALPK1	1.71363	5.44344e-14	6.3672e-10	0.208867	0.388143	1	-0.0308737	0.888873	1	1.47386	5.13346e-11	5.77258e-07	7.05648	NA
ENSG00000073350	LLGL2	78.8708	72.5077	74.6985	63.8918	63.3156	64.8479	118.962	77.7327	75.4956	52.4452	50.9876	49.4702	LLGL2	-0.235396	0.175513	1	0.267363	0.123579	1	-0.329074	0.058433	1	-0.831832	1.93508e-06	0.0189812	-3.11124	NA
ENSG00000073417	PDE8A	35.2441	35.0853	33.8165	29.9011	29.8396	29.4487	29.377	38.1164	36.8737	30.7222	29.3225	28.8278	PDE8A	-0.223813	0.081114	1	0.00437951	0.978517	1	-0.00513434	0.96939	1	-0.233327	0.0698837	1	-53.2769	NA
ENSG00000073464	CLCN4	4.21073	4.36804	4.29347	11.5963	12.3176	12.2359	2.94002	6.24173	5.62349	11.8781	12.2245	11.7397	CLCN4	1.49621	1.40627e-10	1.56391e-06	0.210209	0.379704	1	-0.0123559	0.958095	1	1.27362	3.11312e-08	0.000328372	6.05883	NA
ENSG00000073536	NLE1	34.6632	32.7739	33.868	10.7003	10.1768	10.0208	66.9704	39.9004	38.2842	11.9746	11.858	13.1057	NLE1	-1.71602	2.82436e-16	3.37934e-12	0.518353	0.0109466	1	0.258284	0.210927	1	-1.9761	7.13439e-21	8.83665e-17	-3.81227	NA
ENSG00000073578	SDHA	214.492	216.447	217.983	103.961	103.978	105.354	232.434	174.703	177.071	94.4311	95.8823	96.1489	SDHA	-1.05075	4.28428e-15	5.06788e-11	-0.151852	0.252273	1	-0.129207	0.330539	1	-1.0281	1.62508e-14	1.91889e-10	6.77041	NA
ENSG00000073584	SMARCE1	4.92285	4.731	4.79182	7.72304	7.42233	7.10026	3.58366	4.18855	4.49842	6.79519	6.76944	7.07045	SMARCE1	0.626117	1.44522e-06	0.014377	-0.229905	0.0894255	1	-0.108958	0.387843	1	0.747083	1.55814e-08	0.00016577	-3.24952	NA
ENSG00000073605	GSDMB	3.89215	4.31073	4.17318	1.479	1.54529	1.83765	7.18328	5.33294	5.42199	2.0704	2.10377	2.37331	GSDMB	-1.36485	5.33468e-14	6.24158e-10	0.533	0.00164553	1	0.436973	0.0178623	1	-1.46096	5.69319e-17	6.8916e-13	-2.74102	NA
ENSG00000073614	KDM5A	53.1596	53.8061	53.3209	84.9258	80.1695	77.1367	65.9931	56.2921	55.3786	85.9183	86.2409	87.1727	KDM5A	0.596021	3.46963e-07	0.00354146	0.147918	0.205941	1	0.0984368	0.396709	1	0.546539	2.93723e-06	0.0285058	3.69487	NA
ENSG00000073670	ADAM11	0.631389	0.642999	0.753459	0.624411	0.590778	0.90646	1.00909	0.923663	1.10641	0.885754	0.722398	0.631048	ADAM11	0.0628508	0.851633	1	0.602568	0.0163206	1	0.0838929	0.77546	1	-0.456098	0.0561026	1	-0.756923	NA
ENSG00000073711	PPP2R3A	0.369029	0.318251	0.306662	1.07927	0.972582	0.977004	0.317772	0.587077	0.233215	1.05105	0.722398	0.923748	PPP2R3A	1.70203	6.88212e-08	0.00071987	0.231728	0.592168	1	-0.172167	0.534485	1	1.29787	2.93638e-05	0.265273	5.60085	NA
ENSG00000073712	FERMT2	52.0914	52.3352	50.9494	56.3797	53.1433	52.1076	28.6618	48.315	48.1412	60.3107	57.5139	60.328	FERMT2	0.0569817	0.760804	1	-0.311658	0.0954804	1	0.140487	0.451544	1	0.509128	0.00649317	1	-1.63361	NA
ENSG00000073792	IGF2BP2	182.784	184.507	179.644	184.307	183.597	180.188	128.021	175.898	172.588	198.046	193.199	197.158	IGF2BP2	0.00305284	0.982503	1	-0.198599	0.147444	1	0.102403	0.454776	1	0.304056	0.0265845	1	-1.531	NA
ENSG00000073803	MAP3K13	23.6254	22.8977	23.8323	31.3897	30.9578	32.0306	32.1423	18.6113	19.1076	28.6422	28.7869	29.0648	MAP3K13	0.424229	0.0313416	1	-0.0121798	0.956275	1	-0.125976	0.521412	1	0.310433	0.116594	1	-25.4874	NA
ENSG00000073849	ST6GAL1	295.28	301.34	292.615	73.8299	71.2244	72.8194	132.789	337.173	335.236	65.5865	66.0699	64.6069	ST6GAL1	-2.02952	7.76045e-12	8.81898e-08	-0.143127	0.616199	1	-0.150766	0.598241	1	-2.03716	6.59363e-12	7.52597e-08	14.2332	NA
ENSG00000073910	FRY	17.31	17.4535	17.0616	11.9409	10.8313	11.3188	4.68023	16.5749	16.3873	12.7322	11.6043	11.7676	FRY	-0.60555	0.0984618	1	-0.460442	0.207744	1	0.0829921	0.821377	1	-0.0621065	0.868467	1	0.134884	NA
ENSG00000073921	PICALM	108.18	105.422	106.868	101.963	101.032	99.8943	61.1062	126.504	127.131	118.179	118.731	119.453	PICALM	-0.0814225	0.729458	1	-0.0256908	0.912729	1	0.234625	0.318749	1	0.178893	0.446727	1	-6.96331	NA
ENSG00000073969	NSF	32.1708	33.0986	33.5931	57.8959	57.0022	54.4779	19.6032	31.2837	29.5691	52.2524	52.9046	53.8467	NSF	0.777261	4.14707e-06	0.0404215	-0.2959	0.079301	1	-0.0912249	0.586107	1	0.981939	6.86628e-09	7.38331e-05	-3.31848	NA
ENSG00000074054	CLASP1	105.819	109.472	108.878	133.155	129.695	128.338	42.5359	112.855	110.927	134.819	130.868	133.238	CLASP1	0.271183	0.357624	1	-0.283362	0.336392	1	0.0282632	0.923664	1	0.582809	0.0485512	1	-2.05676	NA
ENSG00000074071	MRPS34	46.9192	48.6865	49.2997	28.3849	30.8487	32.3834	108.354	40.3547	39.51	21.7685	21.1329	21.7473	MRPS34	-0.66195	0.0494109	1	0.377012	0.261319	1	-0.503579	0.134649	1	-1.54254	6.85826e-06	0.0650849	-4.09148	NA
ENSG00000074181	NOTCH3	1.08115	0.967746	1.09715	1.56171	1.4362	1.54136	0.937576	1.07513	0.972069	1.45052	1.39899	1.20251	NOTCH3	0.539712	0.0023491	1	-0.0733617	0.746889	1	-0.166951	0.314149	1	0.446166	0.0145567	1	-6.08172	NA
ENSG00000074201	CLNS1A	90.9769	91.9543	91.7455	65.4218	65.1155	65.4122	99.9869	87.0898	86.2761	62.1565	60.77	63.241	CLNS1A	-0.487442	1.06635e-05	0.101751	-0.007384	0.948881	1	-0.0739117	0.50428	1	-0.55397	5.74623e-07	0.00579048	75.023	NA
ENSG00000074211	PPP2R2C	19.1652	19.5739	19.519	0.279817	0.208975	0.243343	5.41923	11.0886	11.2321	0.0592593	0.0880922	0.0735238	PPP2R2C	-6.4999	7.2352e-64	9.61558e-60	-1.07035	0.000202323	1	-2.29666	3.11814e-05	0.409911	-7.71926	9.71054e-65	1.29121e-60	7.21191	NA
ENSG00000074219	TEAD2	8.16486	7.57731	7.00863	11.3482	11.8131	10.7403	8.75663	6.66246	6.69819	9.61904	9.85639	9.5375	TEAD2	0.577859	6.09292e-05	0.556406	-0.0458722	0.774176	1	-0.225384	0.111994	1	0.398353	0.00643115	1	-8.68398	NA
ENSG00000074266	EED	17.31	17.4726	16.9585	18.433	18.3855	19.4173	13.1668	13.1922	13.096	16.9197	17.3553	18.2349	EED	0.120439	0.256618	1	-0.391797	0.000294547	1	-0.0990313	0.346689	1	0.413214	0.000118474	1	-1.05466	NA
ENSG00000074276	CDHR2	62.211	63.8159	64.508	19.5633	19.8446	18.853	86.6373	76.6051	74.5048	20.4737	21.0061	20.7019	CDHR2	-1.71098	2.07578e-48	2.72965e-44	0.319056	0.00486685	1	0.0940619	0.41833	1	-1.93597	5.26838e-61	6.98798e-57	-6.06783	NA
ENSG00000074319	TSG101	64.01	60.9505	62.9786	72.0104	71.5925	75.0063	75.9099	73.2224	71.3647	80.1741	81.547	80.817	TSG101	0.218157	0.036101	1	0.230383	0.0271838	1	0.149924	0.148192	1	0.137696	0.18555	1	0.597683	NA
ENSG00000074356	NCBP3	35.6752	34.9707	34.8304	42.3616	43.3391	42.7111	24.0848	39.3113	40.7023	45.3649	45.7863	45.2051	NCBP3	0.284086	0.120207	1	-0.0177449	0.92105	1	0.0866613	0.63484	1	0.388491	0.0333361	1	-21.8931	NA
ENSG00000074527	NTN4	11.9503	11.3597	11.7687	6.77196	6.56327	7.21313	4.44185	9.08588	8.66287	4.20551	3.9644	4.77067	NTN4	-0.774241	0.00105467	1	-0.658298	0.00525622	1	-0.670789	0.00493363	1	-0.786675	0.00105229	1	1.19501	NA
ENSG00000074582	BCS1L	31.0464	30.8063	30.6889	16.1725	17.1174	16.8495	71.5236	29.2306	29.0485	15.9693	16.2699	16.409	BCS1L	-0.885334	0.00386825	1	0.48777	0.109044	1	-0.0436389	0.887087	1	-1.41675	4.75518e-06	0.0455547	-2.90454	NA
ENSG00000074590	NUAK1	4.00459	4.731	3.79512	5.11791	4.47699	4.98393	1.72425	5.50124	4.51521	4.37081	4.44366	4.31071	NUAK1	0.220117	0.506369	1	-0.0882357	0.787952	1	-0.152508	0.645152	1	0.155859	0.633217	1	-1.76639	NA
ENSG00000074603	DPP8	39.0109	37.072	37.6486	40.1562	39.1665	37.2791	29.9253	35.205	37.7804	34.6756	36.0743	36.3823	DPP8	0.036006	0.771769	1	-0.143225	0.246692	1	-0.122321	0.321201	1	0.0569125	0.643321	1	-0.397363	NA
ENSG00000074621	SLC24A1	16.2231	15.5241	16.357	16.8479	17.6356	16.5391	6.73035	22.583	21.257	19.7436	19.7797	20.1862	SLC24A1	0.0851167	0.806928	1	0.0736452	0.834619	1	0.227193	0.512056	1	0.23866	0.48994	1	3.24067	NA
ENSG00000074695	LMAN1	369.266	369.843	368.004	288.705	283.902	273.575	122.705	310.92	310.737	293.437	293.194	300.077	LMAN1	-0.387798	0.176226	1	-0.572665	0.0461766	1	0.0674985	0.81368	1	0.252367	0.378316	1	-0.440688	NA
ENSG00000074696	HACD3	179.58	183.915	181.655	156.96	157.239	154.03	89.8316	157.487	160.128	144.778	145.161	145.058	HACD3	-0.219476	0.263093	1	-0.419816	0.0325114	1	-0.106231	0.587979	1	0.0941105	0.630867	1	-0.224171	NA
ENSG00000074755	ZZEF1	34.5695	35.1044	33.7306	43.4919	41.5255	42.5841	25.8727	44.0909	42.986	44.6762	43.6437	42.3617	ZZEF1	0.303603	0.104641	1	0.128619	0.494676	1	0.034439	0.854084	1	0.209421	0.261294	1	1.62823	NA
ENSG00000074800	ENO1	5343.4	5342.72	5339.5	2726.08	2758.07	2823.88	9592.82	4410.64	4312.24	2571.16	2542.34	2535.08	ENO1	-0.947809	0.000567039	1	0.192695	0.479743	1	-0.119316	0.66162	1	-1.25982	5.31811e-06	0.0508039	-6.5379	NA
ENSG00000074842	MYDGF	117.269	116.1	120.959	74.7258	76.256	80.2407	223.232	87.6619	84.4626	64.4983	67.9729	64.2306	MYDGF	-0.616003	0.0548337	1	0.157859	0.621291	1	-0.23337	0.465741	1	-1.00723	0.00180364	1	-6.38057	NA
ENSG00000074855	ANO8	11.5381	9.5449	10.3081	21.9479	22.3399	21.5336	14.2395	14.0674	13.7845	26.1076	25.3757	24.5349	ANO8	1.07034	8.15498e-20	1.00086e-15	0.423814	0.000385444	1	0.208042	0.0670631	1	0.854553	1.79417e-13	2.09542e-09	2.01634	NA
ENSG00000074935	TUBE1	9.13934	9.75503	9.38009	8.26061	7.9814	7.87625	11.5457	25.5281	26.1099	20.4461	20.1603	20.3256	TUBE1	-0.230134	0.376886	1	1.1641	8.46127e-06	0.10965	1.34033	3.0247e-07	0.00402558	-0.0539553	0.837058	1	-0.0463495	NA
ENSG00000074964	ARHGEF10L	116.538	114.381	114.309	36.3243	36.0712	36.221	70.7608	112.923	109.13	30.8049	28.3922	29.1902	ARHGEF10L	-1.66912	1.29653e-21	1.60757e-17	-0.237174	0.163246	1	-0.297595	0.0825343	1	-1.72954	5.76603e-23	7.21272e-19	7.29225	NA
ENSG00000075089	ACTR6	16.5042	17.9119	16.3226	21.7962	22.1354	22.4366	16.5995	17.5679	17.697	22.6501	25.5308	25.5384	ACTR6	0.38822	0.000662726	1	0.0327427	0.78321	1	0.151715	0.177222	1	0.507189	8.29275e-06	0.0782338	15.4901	NA
ENSG00000075131	TIPIN	8.371	8.76168	8.10843	4.73197	4.5179	4.65942	7.94612	9.17003	9.06588	5.1973	5.85322	5.64877	TIPIN	-0.863582	1.32914e-11	1.50392e-07	0.0563761	0.667133	1	0.26521	0.039044	1	-0.654761	2.09571e-07	0.00214874	-11.6142	NA
ENSG00000075151	EIF4G3	50.967	54.7994	52.1008	135.636	133.063	129.015	38.0542	69.5704	72.2043	129.929	129.233	131.719	EIF4G3	1.33352	4.33962e-10	4.77706e-06	0.188667	0.3715	1	-0.0250101	0.905287	1	1.11984	1.36939e-07	0.00141307	5.93554	NA
ENSG00000075188	NUP37	22.501	21.9999	23.9182	13.3606	13.0539	12.9554	21.7725	21.6574	21.66	14.3438	14.4939	13.928	NUP37	-0.798914	6.17096e-14	7.21324e-10	-0.0723631	0.4963	1	0.1196	0.264221	1	-0.606951	1.15284e-08	0.000123112	8.38758	NA
ENSG00000075213	SEMA3A	2.35547	2.15212	2.74686	0.789815	0.890767	0.90646	0.413127	0.873175	0.636226	0.362307	0.440484	0.421976	SEMA3A	-1.52203	4.85171e-11	5.44071e-07	-1.93465	2.74524e-15	3.68192e-11	-1.13828	2.53764e-05	0.333877	-0.72457	0.0164609	1	0.374523	NA
ENSG00000075218	GTSE1	49.2242	49.8327	52.0836	21.4654	21.3309	21.7594	33.5964	33.3033	33.2801	19.5921	19.8502	19.6008	GTSE1	-1.2285	6.84024e-32	8.78014e-28	-0.593877	9.76106e-09	0.000129402	-0.128956	0.219089	1	-0.763575	3.21158e-13	3.73924e-09	1.28575	NA
ENSG00000075234	TTC38	125.74	126.378	124.19	66.4969	63.6156	65.2288	139.845	110.6	115.629	50.5856	48.1543	49.2472	TTC38	-0.946226	1.3549e-14	1.59553e-10	-0.0401557	0.743113	1	-0.400728	0.00106865	1	-1.3068	5.37435e-26	6.80071e-22	32.5432	NA
ENSG00000075239	ACAT1	56.3829	51.934	53.4928	26.786	26.6625	27.2054	53.7877	42.795	44.7828	23.394	23.6983	24.5349	ACAT1	-1.00529	1.38596e-15	1.64832e-11	-0.195885	0.117145	1	-0.171434	0.172797	1	-0.980838	7.50382e-15	8.90253e-11	5.00722	NA
ENSG00000075240	GRAMD4	18.2095	20.338	19.2096	16.4344	16.4629	17.301	10.2108	20.0249	20.4342	14.275	13.3239	12.9384	GRAMD4	-0.202693	0.376076	1	-0.187071	0.412224	1	-0.308983	0.177416	1	-0.324595	0.158687	1	1.73514	NA
ENSG00000075275	CELSR1	2.35547	2.57238	2.38599	0.472789	0.440784	0.52552	2.01031	3.39757	2.95354	0.458732	0.468675	0.631048	CELSR1	-2.42063	3.47491e-21	4.29847e-17	0.205147	0.372972	1	0.123062	0.724361	1	-2.50274	3.69987e-23	4.63076e-19	-12.1997	NA
ENSG00000075292	ZNF638	70.1005	71.3233	70.8148	121.742	115.759	112.959	46.207	93.0642	97.2918	115.548	119.168	120.178	ZNF638	0.723804	0.00214457	1	0.157047	0.504582	1	0.0181427	0.938492	1	0.584899	0.0129127	1	3.72435	NA
ENSG00000075303	SLC25A40	20.4208	20.72	20.6188	19.2738	18.8764	19.4173	13.572	19.0657	18.7046	22.2369	22.1196	22.263	SLC25A40	-0.101571	0.476295	1	-0.264207	0.0637633	1	0.211007	0.136449	1	0.373645	0.00853171	1	-1.41421	NA
ENSG00000075336	TIMM21	26.7549	25.8014	26.0663	11.7479	11.8267	11.6856	19.4363	19.7893	22.0126	10.8588	10.6035	11.7118	TIMM21	-1.1589	2.04837e-24	2.57009e-20	-0.360106	0.00133173	1	-0.088213	0.444683	1	-0.886999	8.71708e-15	1.0335e-10	2.46316	NA
ENSG00000075391	RASAL2	8.59588	8.30322	8.98484	20.5695	19.6946	19.5161	3.63134	9.48978	9.55285	19.0549	18.3702	18.653	RASAL2	1.21037	3.90434e-05	0.36123	-0.188028	0.518467	1	-0.0923727	0.75008	1	1.30603	9.31952e-06	0.0876035	-6.94593	NA
ENSG00000075399	VPS9D1	8.80202	8.45604	8.24591	19.453	18.9582	20.9411	38.0542	11.8627	13.0288	20.4186	21.9646	20.228	VPS9D1	1.22149	0.00124754	1	1.30506	0.000578777	1	0.0772334	0.836172	1	-0.00637681	0.985801	1	-0.00488621	NA
ENSG00000075407	ZNF37A	26.2302	27.7499	26.3584	34.5738	33.5486	31.8049	43.7755	33.3874	34.7914	38.1469	38.6116	39.3929	ZNF37A	0.315172	0.0178847	1	0.478015	0.000335933	1	0.217218	0.100311	1	0.0543682	0.685688	1	0.113737	NA
ENSG00000075413	MARK3	43.5834	42.9175	43.2164	59.288	58.543	57.8499	36.9338	52.2026	54.7405	66.5783	63.3213	65.8614	MARK3	0.437847	0.00410698	1	0.150524	0.326245	1	0.156213	0.303827	1	0.443534	0.00357954	1	2.9466	NA
ENSG00000075415	SLC25A3	338.513	330.204	335.628	220.186	219.964	224.236	349.148	315.699	318.293	208.226	208.958	212.504	SLC25A3	-0.596232	2.19635e-08	0.000232439	-0.0308749	0.771707	1	-0.0773939	0.466445	1	-0.642751	1.65984e-09	1.81304e-05	20.8179	NA
ENSG00000075420	FNDC3B	316.831	327.129	318.959	170.371	169.17	159.053	116.149	300.115	302.307	171.075	172.112	173.268	FNDC3B	-0.949671	0.00126957	1	-0.422209	0.148995	1	0.0507832	0.862096	1	-0.476679	0.103556	1	1.12901	NA
ENSG00000075426	FOSL2	103.458	103.168	103.74	175.182	175.238	172.061	70.141	116.12	115.494	243.958	241.35	241.718	FOSL2	0.751579	2.95814e-05	0.275728	-0.0401608	0.822031	1	0.476696	0.00779143	1	1.26844	2.87357e-12	3.30144e-08	-31.5839	NA
ENSG00000075539	FRYL	30.9714	30.4051	30.1046	58.6953	55.8704	51.4586	13.0953	29.2979	29.1661	50.2275	49.8881	51.7978	FRYL	0.86049	0.000828174	1	-0.353369	0.167879	1	-0.128222	0.615654	1	1.08564	2.65957e-05	0.241116	-3.07226	NA
ENSG00000075568	TMEM131	87.2851	86.873	84.6311	122.817	118.704	116.642	39.8183	103.111	107.82	130.673	126.526	127.189	TMEM131	0.468981	0.114721	1	-0.0452053	0.878719	1	0.101972	0.731084	1	0.616158	0.0384597	1	-13.6302	NA
ENSG00000075618	FSCN1	64.1787	62.6125	64.3877	23.0781	24.4671	24.2143	43.1557	34.2962	31.8024	18.7243	16.2417	17.2453	FSCN1	-1.41481	3.21806e-23	4.01903e-19	-0.808948	9.7097e-09	0.000128731	-0.459443	0.00119617	1	-1.0653	7.87047e-14	9.2234e-10	1.31689	NA
ENSG00000075624	ACTB	2857.11	2891.81	2885.33	1313.28	1326.51	1369.61	1845.83	1503.98	1460.04	1174.49	1162.94	1165.79	ACTB	-1.1067	1.2029e-17	1.45683e-13	-0.844117	5.56187e-11	7.42398e-07	-0.194708	0.128028	1	-0.457294	0.000359214	1	0.541742	NA
ENSG00000075643	MOCOS	25.2745	24.4833	23.6604	10.6176	12.1812	11.728	36.7908	50.8057	49.7364	26.8515	25.9959	25.2736	MOCOS	-1.09033	3.39688e-13	3.93529e-09	0.905283	9.01516e-10	1.20019e-05	1.18009	2.98442e-15	4.01524e-11	-0.815542	2.97987e-08	0.000314495	-0.900869	CBP/p300 activity.dependent
ENSG00000075651	PLD1	89.6276	90.3115	88.1883	49.9151	46.5708	46.7603	32.7144	68.7458	67.2171	33.5598	33.2693	33.2602	PLD1	-0.904837	0.000153775	1	-0.66831	0.00501495	1	-0.5176	0.0297645	1	-0.75412	0.00160099	1	1.1284	NA
ENSG00000075702	WDR62	20.2334	20.5863	20.0001	7.18547	7.17688	6.71932	33.4296	21.3208	21.9287	8.31043	8.78512	8.61758	WDR62	-1.53247	2.15106e-17	2.60042e-13	0.332906	0.0576961	1	0.287555	0.109835	1	-1.57784	1.82789e-18	2.23497e-14	-4.73958	NA
ENSG00000075711	DLG1	59.6436	58.8683	59.4042	70.9629	70.7335	70.5338	26.4925	56.8811	58.7034	66.4405	66.9862	68.9417	DLG1	0.254548	0.30489	1	-0.323995	0.191694	1	-0.0686754	0.781877	1	0.509869	0.0401292	1	-1.5737	NA
ENSG00000075785	RAB7A	160.334	164.831	165.381	186.801	192.297	192.759	139.058	148.416	143.369	176.722	178.455	178.969	RAB7A	0.221297	0.0300212	1	-0.187168	0.0669535	1	-0.098436	0.33383	1	0.31003	0.00239362	1	-1.65642	NA
ENSG00000075790	BCAP29	18.2657	18.8671	19.3815	44.057	44.1845	44.2771	18.6973	20.4962	19.0908	43.8772	43.4182	43.7974	BCAP29	1.23068	4.90262e-30	6.26555e-26	0.0451737	0.684619	1	-0.0156144	0.882976	1	1.16989	2.42025e-27	3.0788e-23	25.8976	NA
ENSG00000075826	SEC31B	1.69957	1.19698	1.50958	2.52657	2.55434	2.402	1.24748	1.15927	1.07282	2.16682	2.11787	2.17818	SEC31B	0.774862	1.95509e-06	0.0193299	-0.358131	0.0639444	1	-0.214343	0.160777	1	0.918755	1.21252e-07	0.00125374	-2.56541	NA
ENSG00000075856	SART3	74.3358	71.4761	72.3785	61.2453	61.4338	62.3083	60.2241	84.2456	85.3358	70.0771	69.2697	68.1472	SART3	-0.238268	0.100989	1	0.0754759	0.605259	1	0.165721	0.253543	1	-0.148024	0.308992	1	-1.9612	NA
ENSG00000075914	EXOSC7	19.1652	18.5232	18.127	10.9209	11.5267	11.5446	26.5402	14.6059	16.3369	10.542	10.5048	11.461	EXOSC7	-0.71692	0.000519793	1	0.0403251	0.842005	1	-0.0645879	0.756225	1	-0.821831	7.06797e-05	0.615832	-20.3801	NA
ENSG00000075945	KIFAP3	15.2111	14.7791	15.2744	23.147	22.9535	23.1844	10.9259	14.3703	15.3797	25.1985	25.5026	25.1621	KIFAP3	0.615084	9.43935e-06	0.090278	-0.151235	0.278083	1	0.131021	0.339235	1	0.897341	1.13359e-10	1.26747e-06	-5.93343	NA
ENSG00000075975	MKRN2	34.9256	36.1169	35.3803	34.1189	31.4487	33.0606	24.4424	39.7994	38.2338	38.0091	38.2028	37.1768	MKRN2	-0.109829	0.530557	1	-0.0532936	0.758971	1	0.201382	0.249035	1	0.144845	0.405706	1	-2.71787	NA
ENSG00000076003	MCM6	53.8904	52.6408	51.2416	14.0222	13.9948	14.7473	24.0372	39.0925	39.3757	12.8837	12.1963	12.4924	MCM6	-1.88557	3.6195e-24	4.53704e-20	-0.621317	0.000570089	1	-0.187121	0.305663	1	-1.45137	3.58991e-15	4.27378e-11	2.33595	NA
ENSG00000076043	REXO2	18.8092	17.4535	17.474	21.8376	21.5627	21.8017	49.1392	17.8035	18.2176	21.4104	22.8103	21.3849	REXO2	0.279441	0.406642	1	0.664078	0.0490726	1	0.0089126	0.979538	1	-0.375734	0.263467	1	-0.565798	NA
ENSG00000076053	RBM7	23.8128	25.8778	25.0867	31.5965	32.8804	33.5826	29.2101	29.5335	29.4012	41.3978	42.0791	42.8496	RBM7	0.391461	0.000244074	1	0.237623	0.0270566	1	0.365734	0.000519205	1	0.519566	9.91578e-07	0.00987612	2.18652	NA
ENSG00000076067	RBMS2	3.85467	3.66124	3.82949	10.7003	10.5722	9.58342	3.63134	3.48172	3.33976	9.57772	10.4343	9.96958	RBMS2	1.45048	3.71753e-30	4.75249e-26	-0.12233	0.386004	1	-0.0417867	0.725709	1	1.53103	1.51132e-32	1.94884e-28	-12.5156	NA
ENSG00000076108	BAZ2A	127.445	129.797	129.345	212.26	206.178	201.281	80.3916	144.999	152.521	230.706	228.339	233.147	BAZ2A	0.680946	0.00112409	1	-0.0324393	0.875845	1	0.15958	0.443053	1	0.872965	3.11073e-05	0.28037	-26.9107	NA
ENSG00000076201	PTPN23	61.8924	63.4339	61.9819	50.0391	50.9342	51.12	58.174	52.8084	54.5726	49.0015	47.0267	45.7905	PTPN23	-0.300603	0.00505876	1	-0.178573	0.0969595	1	-0.10096	0.346564	1	-0.222988	0.0378309	1	1.24872	NA
ENSG00000076242	MLH1	45.3075	45.4199	46.344	32.4924	31.9668	31.7344	29.8061	50.7553	48.964	37.1138	37.4698	37.4834	MLH1	-0.511323	0.00577994	1	-0.0807743	0.660761	1	0.220537	0.233078	1	-0.210013	0.257265	1	2.6	NA
ENSG00000076248	UNG	110.916	111.898	108.947	32.3822	32.7441	32.5386	44.6337	74.6192	76.9229	25.226	25.8973	24.6046	UNG	-1.76516	7.53642e-20	9.25322e-16	-0.757615	6.09739e-05	0.777417	-0.367403	0.0523379	1	-1.37494	7.92541e-13	9.17684e-09	1.81483	NA
ENSG00000076321	KLHL20	10.3762	10.7293	10.7377	18.1573	17.9901	18.3168	10.7114	12.0815	11.8366	17.3605	18.1024	17.3428	KLHL20	0.775927	2.65369e-12	3.03635e-08	0.123506	0.283852	1	-0.0446979	0.68099	1	0.607718	3.82616e-08	0.000402168	4.92054	NA
ENSG00000076351	SLC46A1	11.5568	11.054	11.6313	4.58035	4.62698	4.84284	18.0298	14.1515	14.9599	4.19173	3.89392	5.09124	SLC46A1	-1.2908	3.00748e-17	3.63153e-13	0.460074	0.00175589	1	-0.0930479	0.553453	1	-1.84392	4.55855e-33	5.88509e-29	-4.00788	NA
ENSG00000076356	PLXNA2	7.69637	8.26501	8.29746	6.79953	6.41328	6.49358	6.22974	9.65808	9.90549	7.27731	6.78354	7.36315	PLXNA2	-0.301164	0.0910453	1	0.0934343	0.612301	1	0.121128	0.497074	1	-0.273478	0.127053	1	-2.92696	NA
ENSG00000076382	SPAG5	70.7189	68.2478	67.8246	24.5116	23.2808	23.0433	39.3654	51.9333	51.0126	25.5015	26.3624	25.19	SPAG5	-1.5468	1.24159e-29	1.58501e-25	-0.538461	5.85632e-05	0.746974	0.121523	0.368985	1	-0.886816	5.79308e-11	6.50736e-07	1.64695	NA
ENSG00000076513	ANKRD13A	34.3072	33.2133	31.3591	42.4856	41.5392	42.1326	24.5616	40.2033	40.316	49.7453	49.3384	48.1042	ANKRD13A	0.35181	0.0523565	1	0.089097	0.62686	1	0.222584	0.217993	1	0.485295	0.00735636	1	5.44681	NA
ENSG00000076554	TPD52	34.3821	34.6651	33.6962	27.7508	25.7898	27.4735	30.2352	29.1969	29.1997	28.5595	30.6052	30.0265	TPD52	-0.343113	0.00125698	1	-0.213618	0.0456733	1	0.138882	0.190914	1	0.00938801	0.932944	1	-0.0439476	NA
ENSG00000076555	ACACB	20.983	21.0257	19.9486	22.4854	21.1945	21.8864	13.4052	20.7318	22.1973	18.187	18.3138	17.3568	ACACB	0.0818531	0.642983	1	-0.135121	0.441084	1	-0.284231	0.105889	1	-0.0672518	0.709359	1	0.497716	NA
ENSG00000076604	TRAF4	47.144	45.1143	46.6877	31.2381	31.8168	31.9319	86.5419	61.4082	60.3659	33.3945	33.7908	32.6469	TRAF4	-0.54917	0.000336214	1	0.58382	0.00013253	1	0.0718455	0.639095	1	-1.06115	5.3577e-12	6.12546e-08	-1.81759	NA
ENSG00000076650	GPATCH1	17.1975	17.2815	18.6769	12.313	11.6358	12.5745	18.3397	19.4527	20.4174	12.2363	12.4218	12.6875	GPATCH1	-0.542873	1.51546e-06	0.0150606	0.132007	0.24209	1	0.0322624	0.778917	1	-0.64262	1.19999e-08	0.000128087	-4.86808	NA
ENSG00000076685	NT5C2	24.806	24.9609	25.7569	29.7632	28.7488	28.1084	1.24748	27.8842	27.0503	27.1407	27.2223	28.5212	NT5C2	0.197993	0.784983	1	-0.426947	0.556466	1	-0.0636776	0.930197	1	0.561269	0.439879	1	-1.31461	NA
ENSG00000076706	MCAM	16.6541	16.7658	16.9928	38.2954	36.1121	37.4767	7.92228	13.7476	13.2135	33.2981	34.0728	32.7026	MCAM	1.15153	7.70263e-10	8.43669e-06	-0.528796	0.00475968	1	-0.161082	0.381758	1	1.51925	9.754e-16	1.16746e-11	-2.87304	NA
ENSG00000076770	MBNL3	516.037	523.104	516.873	169.517	165.448	162.284	192.433	428.102	436.476	125.108	124.877	129.112	MBNL3	-1.64599	3.73368e-10	4.11638e-06	-0.557811	0.0298899	1	-0.39148	0.127189	1	-1.47966	1.54218e-08	0.000164104	2.65262	NA
ENSG00000076826	CAMSAP3	76.0786	77.7228	78.0323	39.6186	40.6528	41.1873	173.338	109.304	107.367	41.8386	42.0509	40.0619	CAMSAP3	-0.933134	2.94305e-07	0.00300985	0.750268	3.4323e-05	0.440124	0.0293318	0.871783	1	-1.65407	3.57286e-19	4.38569e-15	-2.20464	NA
ENSG00000076864	RAP1GAP	43.2086	43.8535	45.8285	20.28	19.4082	19.9958	47.5658	44.377	43.3722	23.6557	23.642	24.4095	RAP1GAP	-1.1561	4.02576e-26	5.08372e-22	0.0255358	0.811718	1	0.265151	0.0151028	1	-0.916489	3.42034e-17	4.14648e-13	-35.8904	NA
ENSG00000076924	XAB2	59.2501	56.9007	59.7307	49.6256	50.3343	52.0511	114.338	52.2699	51.2813	48.7949	46.8716	46.2783	XAB2	-0.210551	0.439223	1	0.308618	0.256681	1	-0.098903	0.716432	1	-0.618073	0.0235047	1	-2.00271	NA
ENSG00000076928	ARHGEF1	66.0527	66.3184	66.5702	63.2026	66.2473	66.16	101.25	61.6438	62.9351	58.4098	58.7684	56.3695	ARHGEF1	-0.0243766	0.895155	1	0.182329	0.322037	1	-0.172731	0.348488	1	-0.379437	0.0395563	1	-2.08106	NA
ENSG00000076944	STXBP2	23.7003	22.5157	24.6915	30.7143	32.3077	34.6831	132.86	24.0471	24.1788	33.1328	32.6773	31.9778	STXBP2	0.462985	0.400035	1	1.35343	0.0153253	1	0.00122493	0.998517	1	-0.889237	0.107604	1	-0.657023	NA
ENSG00000076984	MAP2K7	46.0946	44.6176	45.2098	49.7359	50.2934	50.8519	89.2595	47.6587	48.3931	51.2744	49.7612	48.8569	MAP2K7	0.150725	0.497009	1	0.446729	0.0442267	1	-0.00948764	0.966298	1	-0.305494	0.167965	1	-0.683846	NA
ENSG00000077044	DGKD	51.2481	53.042	50.5714	57.8545	54.4796	55.7618	26.6356	61.0548	63.0694	67.4323	65.5484	67.4782	DGKD	0.118379	0.656176	1	-0.0381177	0.885429	1	0.254148	0.338635	1	0.410644	0.122306	1	-10.7731	NA
ENSG00000077097	TOP2B	138.127	140.647	133.47	276.837	266.898	258.436	58.0071	143.047	149.985	247.691	248.087	254.528	TOP2B	0.960568	0.000855256	1	-0.231664	0.417446	1	-0.096443	0.735529	1	1.09579	0.000148336	1	-4.73008	NA
ENSG00000077147	TM9SF3	230.009	234.251	236.113	350.222	344.091	344.274	103.277	212.805	218.464	341.181	344.657	347.76	TM9SF3	0.568486	0.0170415	1	-0.389671	0.101453	1	-0.0069478	0.976723	1	0.95121	7.19637e-05	0.626803	-2.44106	NA
ENSG00000077150	NFKB2	45.4949	46.5279	46.9626	48.3713	50.7706	50.4145	100.988	54.1211	54.9756	49.9933	51.1003	47.5188	NFKB2	0.105815	0.633295	1	0.595735	0.0073197	1	-0.00914102	0.967529	1	-0.499064	0.0243936	1	-0.837728	NA
ENSG00000077152	UBE2T	30.5404	30.2523	30.0703	8.02628	8.3632	8.46882	50.498	25.2925	25.052	10.3629	10.3216	10.095	UBE2T	-1.87374	1.33615e-13	1.55487e-09	0.149302	0.540702	1	0.309256	0.21204	1	-1.71379	9.68036e-12	1.1025e-07	-11.4787	NA
ENSG00000077157	PPP1R12B	11.8192	11.245	11.0126	6.96493	7.61323	6.80397	4.37033	11.6439	11.9373	7.33241	7.30508	7.11227	PPP1R12B	-0.674582	0.0271275	1	-0.283754	0.34925	1	0.0246715	0.937744	1	-0.366146	0.232259	1	1.29036	NA
ENSG00000077232	DNAJC10	120.53	118.927	118.175	128.414	126.327	123.146	59.2229	131.132	131.648	132.78	130.84	134.381	DNAJC10	0.0794939	0.752346	1	-0.15113	0.548186	1	0.0748384	0.766315	1	0.305463	0.225175	1	-2.02119	NA
ENSG00000077235	GTF3C1	155.461	158.585	160.965	259.125	256.767	247.53	100.964	151.681	151.497	218.474	217.613	220.505	GTF3C1	0.684619	1.64141e-05	0.154884	-0.232803	0.141511	1	-0.217513	0.169009	1	0.699909	1.06506e-05	0.0997641	-3.00645	NA
ENSG00000077238	IL4R	22.6509	22.6494	23.3683	72.2034	73.897	74.837	24.5616	28.9108	27.9402	94.7755	90.5823	94.2951	IL4R	1.68713	1.87209e-47	2.45974e-43	0.247032	0.0337276	1	0.340131	0.00249707	1	1.78022	1.01429e-52	1.34008e-48	7.20645	NA
ENSG00000077254	USP33	45.6448	47.0055	46.533	66.3591	67.3791	65.7509	21.3434	55.1141	56.9403	67.1431	66.7324	67.3946	USP33	0.519603	0.0783131	1	-0.060657	0.83644	1	0.0128286	0.965473	1	0.593089	0.0445111	1	-9.77775	NA
ENSG00000077312	SNRPA	87.6599	87.1595	87.879	38.5848	38.9347	41.7376	199.036	79.9205	78.8876	41.935	39.5419	41.4418	SNRPA	-1.13993	0.000282122	1	0.445777	0.150995	1	0.0436662	0.888478	1	-1.54204	1.14209e-06	0.0113455	-3.45921	NA
ENSG00000077348	EXOSC5	22.8383	22.7831	23.4542	5.93115	5.94966	6.04209	86.1843	28.793	26.9999	6.56102	6.17742	6.28992	EXOSC5	-1.95172	5.31249e-07	0.00538421	1.03977	0.00604759	1	0.0867801	0.820645	1	-2.90471	5.40921e-13	6.27901e-09	-2.79362	NA
ENSG00000077380	DYNC1I2	108.03	111.439	106.335	129.489	131.59	133.05	119.63	91.0783	90.9275	132.312	135.844	138.033	DYNC1I2	0.274743	0.0378708	1	-0.111721	0.400341	1	0.0434914	0.74213	1	0.429956	0.00118333	1	-3.84848	NA
ENSG00000077454	LRCH4	4.88537	4.36804	4.34502	9.94222	9.63133	10.2889	1.46202	4.00343	4.39767	9.34355	8.58778	8.074	LRCH4	1.14014	0.000289244	1	-0.458924	0.143528	1	-0.200147	0.517449	1	1.39895	9.90661e-06	0.0929834	-3.04833	NA
ENSG00000077458	FAM76B	16.804	15.8488	14.8104	18.3641	18.1401	16.8777	10.0439	18.7627	18.7214	19.1651	20.2026	19.8656	FAM76B	0.16995	0.428999	1	0.00440793	0.990446	1	0.150276	0.482415	1	0.315816	0.139316	1	71.6472	NA
ENSG00000077463	SIRT6	14.2928	13.6329	14.1402	18.433	20.4173	19.1916	38.0781	12.8893	12.6258	17.636	17.7782	16.2417	SIRT6	0.465279	0.202588	1	0.595892	0.102974	1	-0.168439	0.64396	1	-0.299062	0.411171	1	-0.501872	NA
ENSG00000077514	POLD3	19.4838	19.5166	19.5705	6.53764	6.7269	6.32427	16.7426	18.7291	19.0572	7.85586	7.09364	7.07045	POLD3	-1.58445	3.09501e-40	4.03404e-36	-0.101834	0.376424	1	0.16952	0.165143	1	-1.3131	2.31635e-28	2.95752e-24	12.8945	NA
ENSG00000077549	CAPZB	152.163	151.058	152.974	115.981	119.618	120.564	158.344	133.202	132.169	107.82	106.976	106.421	CAPZB	-0.357201	0.00176306	1	-0.106892	0.349979	1	-0.149023	0.191745	1	-0.399332	0.000476174	1	3.73586	NA
ENSG00000077585	GPR137B	0.837529	0.834027	1.11433	17.1649	18.181	17.95	0.579997	0.75537	0.904901	19.8538	21.1893	20.3953	GPR137B	4.2965	7.14664e-130	9.62367e-126	-0.306611	0.165367	1	0.205421	0.136837	1	4.80861	4.32544e-152	5.82939e-148	-15.6831	NA
ENSG00000077616	NAALAD2	5.56001	5.24677	5.926	6.45493	6.35873	6.6911	2.53476	5.31611	5.13652	5.73452	6.10695	5.69058	NAALAD2	0.221969	0.349266	1	-0.36032	0.129283	1	-0.154582	0.512739	1	0.427735	0.06962	1	-1.1871	NA
ENSG00000077684	JADE1	35.1317	34.4549	34.3836	35.5111	34.5985	32.849	31.1172	35.6425	35.7654	39.7723	38.1605	40.3965	JADE1	-0.0140808	0.902925	1	-0.0192632	0.864754	1	0.200893	0.0767201	1	0.206074	0.0699574	1	-10.6978	NA
ENSG00000077713	SLC25A43	17.0101	17.6063	17.3022	12.0236	11.0904	12.25	13.3813	15.6325	16.488	12.3327	11.9285	12.3809	SLC25A43	-0.555199	5.89503e-06	0.057058	-0.188278	0.12284	1	0.0514499	0.678084	1	-0.315468	0.0105767	1	1.67555	NA
ENSG00000077721	UBE2A	30.428	30.3096	31.1529	37.9646	37.0393	37.3074	42.3452	28.8435	28.4104	35.6812	37.202	37.3719	UBE2A	0.289745	0.0719246	1	0.1148	0.474815	1	-0.0266839	0.868687	1	0.14826	0.359698	1	1.29147	NA
ENSG00000077782	FGFR1	55.8581	51.5137	53.7505	194.479	192.379	194.001	42.083	58.7155	57.7463	186.985	187.546	185.743	FGFR1	1.8506	3.98127e-37	5.16291e-33	-0.0223933	0.872942	1	-0.052061	0.711095	1	1.82093	4.54775e-36	5.89707e-32	-81.3159	NA
ENSG00000077942	FBLN1	112.734	113.082	117.454	48.2059	47.8935	48.1571	155.435	99.7454	95.2095	54.0707	52.9751	52.2439	FBLN1	-1.25123	5.47818e-12	6.23637e-08	0.0292034	0.869617	1	0.143103	0.424874	1	-1.13733	3.33914e-10	3.7001e-06	-38.9452	NA
ENSG00000078043	PIAS2	33.4639	34.3785	35.5177	43.9192	44.3481	43.0074	16.0989	23.7779	25.2871	41.6733	41.5858	40.8285	PIAS2	0.345142	0.034065	1	-0.664235	5.1807e-05	0.661834	-0.0812914	0.616925	1	0.928094	1.6161e-08	0.000171872	-1.39724	NA
ENSG00000078061	ARAF	33.9324	32.9649	34.9163	46.414	47.198	46.6898	48.3048	35.7099	35.0433	53.6712	51.6078	50.7803	ARAF	0.4629	0.00131514	1	0.224628	0.118983	1	0.153657	0.283532	1	0.391926	0.00652545	1	1.74478	NA
ENSG00000078070	MCCC1	24.8809	24.6743	25.4476	20.3765	21.8763	21.3361	15.4791	25.2925	25.1695	22.6777	22.2888	23.5592	MCCC1	-0.238503	0.183011	1	-0.184072	0.30266	1	0.108016	0.546368	1	0.0535865	0.761708	1	-0.291117	NA
ENSG00000078124	ACER3	7.80881	8.74258	8.93329	15.0146	14.9902	14.451	10.1393	8.73246	8.42778	13.1592	13.8314	14.0534	ACER3	0.804597	1.40017e-10	1.55727e-06	0.0957015	0.452199	1	-0.1155	0.345926	1	0.593392	2.45492e-06	0.0239404	6.20045	NA
ENSG00000078140	UBE2K	99.2225	97.5515	98.4131	102.224	100.773	100.191	77.5071	89.4122	93.48	89.8166	90.0608	92.7062	UBE2K	0.0385953	0.733115	1	-0.180513	0.11061	1	-0.153565	0.17385	1	0.0655446	0.561407	1	-0.363101	NA
ENSG00000078142	PIK3C3	50.9483	50.4058	49.1623	64.6086	64.2155	64.3259	33.2627	49.4426	49.6525	65.2008	61.7567	63.5755	PIK3C3	0.360008	0.0225199	1	-0.184531	0.242049	1	-0.019686	0.900876	1	0.524855	0.000889838	1	-2.84426	NA
ENSG00000078177	N4BP2	37.0432	36.9574	36.9097	49.4464	44.8254	43.1061	17.2193	37.174	36.3867	45.0894	44.2216	44.2852	N4BP2	0.308986	0.20902	1	-0.288096	0.241358	1	-0.0403005	0.869995	1	0.556784	0.0237638	1	-1.93263	NA
ENSG00000078246	TULP3	19.6525	21.637	20.3782	23.5743	23.0763	21.7735	18.7927	19.2508	18.587	26.5071	26.0523	26.1796	TULP3	0.150329	0.164204	1	-0.122939	0.261011	1	0.202787	0.0574364	1	0.476055	1.05361e-05	0.098744	-3.87228	NA
ENSG00000078269	SYNJ2	111.984	111.325	108.878	45.6973	45.2617	46.8873	73.5737	139.277	142.563	47.6378	48.6618	48.3691	SYNJ2	-1.26948	8.19378e-09	8.76161e-05	0.0978541	0.652426	1	0.0697378	0.748581	1	-1.2976	3.89748e-09	4.21825e-05	-13.2605	NA
ENSG00000078304	PPP2R5C	86.3294	86.4718	88.343	119.84	120.668	118.955	56.6483	88.8568	90.2055	114.722	113.671	114.826	PPP2R5C	0.461127	0.00646632	1	-0.147308	0.38348	1	-0.0667344	0.692827	1	0.541701	0.00138723	1	-3.67734	NA
ENSG00000078319	PMS2P1	5.82237	5.18946	5.51357	4.49764	4.54517	4.41957	10.6637	5.90514	5.77462	4.37081	5.00748	4.71491	PMS2P1	-0.297567	0.199627	1	0.43188	0.0598127	1	0.0664208	0.77728	1	-0.66305	0.00394905	1	-1.53526	NA
ENSG00000078369	GNB1	446.587	449.348	458.274	454.316	459.764	458.81	448.459	426.672	424.772	465.734	466.796	458.386	GNB1	0.019763	0.851079	1	-0.0590886	0.574697	1	0.0188203	0.85805	1	0.097672	0.353359	1	-1.65298	NA
ENSG00000078401	EDN1	6.96551	7.04243	7.16329	0.0868445	0.072617	0.0740361	2.98769	2.42147	2.70166	0.141909	0.0739965	0.115338	EDN1	-7.19081	2.10631e-150	2.84015e-146	-1.40029	3.01951e-18	4.05702e-14	0.753161	0.261852	1	-5.0397	4.36853e-74	5.83112e-70	3.59904	NA
ENSG00000078403	MLLT10	53.6281	52.679	53.2178	49.0881	49.257	47.621	31.4271	62.9733	63.2037	60.8204	60.0793	61.0667	MLLT10	-0.128222	0.57465	1	-0.0167969	0.940669	1	0.318213	0.163406	1	0.206786	0.364302	1	-12.3109	NA
ENSG00000078487	ZCWPW1	3.31121	3.33649	3.00463	3.83602	3.23613	3.43195	10.5207	5.26563	5.47236	4.96313	5.37397	5.37	ZCWPW1	0.123445	0.636013	1	1.14162	1.0568e-05	0.136686	0.584573	0.0217521	1	-0.433714	0.0852273	1	-0.379912	NA
ENSG00000078618	NRDC	104.357	104.085	101.266	99.7295	98.796	98.3	107.448	117.416	112.858	110.259	111.514	110.394	NRDC	-0.0612881	0.551954	1	0.125164	0.225149	1	0.162336	0.114366	1	-0.0241175	0.815773	1	-0.192687	NA
ENSG00000078668	VDAC3	77.2779	76.5384	78.6853	62.9959	61.8975	63.7897	74.7418	53.9865	51.466	50.2275	49.8317	52.1323	VDAC3	-0.301419	0.0453293	1	-0.368696	0.0146651	1	-0.310238	0.0395071	1	-0.242957	0.106843	1	0.658961	NA
ENSG00000078674	PCM1	192.21	197.612	195.763	248.125	235.332	222.529	86.7326	227.682	230.537	232.29	233.202	242.123	PCM1	0.269797	0.364598	1	-0.103614	0.72745	1	0.00332664	0.991147	1	0.376738	0.205704	1	-3.63597	NA
ENSG00000078687	TNRC6C	17.31	18.1794	17.1475	29.336	28.1897	25.3854	26.4449	22.3474	23.272	28.9452	27.7156	30.152	TNRC6C	0.656553	9.80976e-08	0.00102031	0.452688	0.000254543	1	0.0663768	0.585156	1	0.270234	0.0274605	1	0.596954	NA
ENSG00000078699	CBFA2T2	38.5986	38.8486	38.8344	55.5664	55.2704	54.1251	45.6349	42.6267	43.5066	59.3051	57.9367	56.8155	CBFA2T2	0.504842	1.65346e-06	0.016399	0.180134	0.0886068	1	0.0774682	0.458602	1	0.402174	0.000131692	1	2.23263	NA
ENSG00000078747	ITCH	99.0163	104.658	103.311	134.947	133.049	127.618	50.4026	109.877	112.573	146.748	145.753	149.657	ITCH	0.366023	0.145351	1	-0.169736	0.498945	1	0.160501	0.522544	1	0.69626	0.00575342	1	-4.10202	NA
ENSG00000078804	TP53INP2	62.717	64.6373	64.0269	92.2725	92.4826	92.459	46.3977	78.7761	78.9044	94.0179	92.5839	92.6922	TP53INP2	0.53476	0.00426619	1	0.0933427	0.619069	1	0.0107881	0.954139	1	0.452204	0.0154935	1	4.84456	NA
ENSG00000078808	SDF4	255.364	252.456	255.531	151.487	158.616	158.319	336.728	223.34	222.326	150.578	149.263	145.448	SDF4	-0.704642	2.02731e-05	0.190526	0.0353572	0.829542	1	-0.0730864	0.657197	1	-0.813086	9.10685e-07	0.00908499	-22.9963	NA
ENSG00000078814	MYH7B	1.09989	1.13967	1.38929	0.665762	0.672593	0.694827	0.770706	0.721711	0.736979	1.16125	1.01841	1.00738	MYH7B	-0.868962	1.65091e-05	0.155747	-0.734257	0.000553422	1	0.673109	0.000571695	1	0.53847	0.00975243	1	-0.733354	NA
ENSG00000078898	BPIFB2	499.49	495.004	499.483	243.976	249.213	251.127	1144.07	490.404	484.451	211.917	212.862	210.553	BPIFB2	-1.00526	0.000590923	1	0.50415	0.0825678	1	-0.228435	0.430775	1	-1.73784	5.49328e-09	5.9256e-05	-3.44707	NA
ENSG00000078900	TP73	7.90251	8.32232	7.97096	2.34738	2.51343	2.96636	5.896	5.63587	5.37161	2.37344	2.31521	2.24787	TP73	-1.63988	1.48863e-32	1.91483e-28	-0.521652	8.24337e-05	1	-0.175753	0.236519	1	-1.29393	8.97324e-20	1.10559e-15	2.48044	NA
ENSG00000078902	TOLLIP	52.1851	52.87	52.8569	55.7456	58.1476	59.5853	78.1269	58.665	53.8841	55.1038	56.062	52.9965	TOLLIP	0.135701	0.361413	1	0.27137	0.0679114	1	-0.079673	0.591629	1	-0.215343	0.146617	1	-0.793541	NA
ENSG00000078967	UBE2D4	4.43561	3.94778	4.29347	5.07656	5.19969	5.60472	7.32632	3.39757	3.49089	4.20551	3.9785	3.71137	UBE2D4	0.327019	0.230543	1	0.158799	0.554665	1	-0.419593	0.12196	1	-0.251361	0.353688	1	-1.58289	NA
ENSG00000079134	THOC1	27.5608	29.0106	27.0114	19.3427	19.0264	19.1775	13.9534	24.6698	24.2796	22.595	22.2324	21.6079	THOC1	-0.539135	0.00606658	1	-0.408611	0.037168	1	0.207524	0.290166	1	0.0770039	0.692092	1	-0.188453	NA
ENSG00000079150	FKBP7	13.6369	12.4676	12.3358	8.48115	8.82682	8.7651	11.4266	9.45613	9.72077	7.34619	7.38965	7.62798	FKBP7	-0.561491	6.18191e-06	0.0597358	-0.333053	0.00808206	1	-0.222226	0.0769838	1	-0.450647	0.000344138	1	1.35308	NA
ENSG00000079246	XRCC5	518.886	519.914	514.416	450.002	448.541	452.207	451.558	454.995	468.314	427.26	429.175	425.255	XRCC5	-0.201509	0.0531541	1	-0.175961	0.091391	1	-0.0757184	0.467342	1	-0.101266	0.331237	1	0.575502	NA
ENSG00000079263	SP140	0.518949	0.337354	0.306662	1.2309	1.0953	1.03344	0.484643	0.300979	0.266799	0.720455	0.919737	1.00738	SP140	1.61244	1.08051e-08	0.000115215	-0.198994	0.693976	1	-0.355086	0.151286	1	1.45658	1.37006e-06	0.0135485	-7.31972	NA
ENSG00000079277	MKNK1	18.3219	17.6063	16.9413	22.3476	22.2854	22.5072	19.3886	18.8301	19.5274	24.7577	24.7273	24.2422	MKNK1	0.345454	0.00100502	1	0.12754	0.231119	1	0.135202	0.1914	1	0.353112	0.000743377	1	2.76865	NA
ENSG00000079308	TNS1	186.757	190.315	182.858	61.6864	61.0384	58.9363	71.4283	131.586	132.471	71.9918	68.1843	67.2413	TNS1	-1.62447	2.91557e-14	3.41967e-10	-0.738792	0.000421317	1	0.191376	0.359629	1	-0.6943	0.000927787	1	0.939777	NA
ENSG00000079313	REXO1	30.9527	33.3661	31.4106	28.316	31.0259	29.2935	15.7652	36.585	35.1777	31.9482	29.4071	31.2391	REXO1	-0.111171	0.671417	1	-0.128252	0.623348	1	0.0631049	0.80986	1	0.0801875	0.758224	1	-0.625231	NA
ENSG00000079332	SAR1A	80.1639	80.8174	79.6476	74.3537	74.9878	72.0434	74.4558	59.557	60.9536	58.0241	60.1498	60.5091	SAR1A	-0.120286	0.322664	1	-0.304406	0.0126845	1	-0.309306	0.0110229	1	-0.125182	0.303502	1	0.411234	NA
ENSG00000079335	CDC14A	6.21591	5.93447	5.82289	11.4309	11.3631	10.7686	1.15212	7.30197	6.91649	11.7817	12.2527	11.0846	CDC14A	0.90436	0.0631203	1	-0.223792	0.64426	1	0.065567	0.892573	1	1.19373	0.0145387	1	-5.3341	NA
ENSG00000079385	CEACAM1	79.3768	82.2883	83.6344	21.4654	21.0445	20.5883	69.8072	81.1827	80.3149	13.724	13.6199	14.9315	CEACAM1	-1.96039	6.49738e-59	8.60708e-55	-0.0843788	0.468705	1	-0.578808	1.50572e-06	0.0199899	-2.45481	7.30827e-88	9.78504e-84	29.0927	NA
ENSG00000079387	SENP1	18.0783	16.8613	16.5117	18.309	17.8265	18.2745	11.0451	21.5901	21.1562	21.4655	20.8369	20.8134	SENP1	0.0808372	0.715578	1	0.0663756	0.769372	1	0.214469	0.330319	1	0.228926	0.297387	1	3.44895	NA
ENSG00000079393	DUSP13	0.387769	0.413765	0.444138	2.94008	3.14068	3.58715	1.91496	0.873175	0.384344	5.34882	5.64179	5.30031	DUSP13	3.04917	6.58534e-11	7.36767e-07	1.39284	0.00269436	1	0.758334	0.0672724	1	2.41381	5.7172e-08	0.000597962	1.73301	NA
ENSG00000079432	CIC	92.8509	91.8588	90.7488	73.568	75.3015	74.3291	61.8213	79.9205	79.3242	75.5044	74.2595	74.4473	CIC	-0.303607	0.0164969	1	-0.316828	0.0123907	1	0.0065339	0.959353	1	0.0197554	0.874696	1	-0.0623537	NA
ENSG00000079459	FDFT1	266.271	261.664	267.045	124.292	122.441	123.625	178.249	119.251	117.09	112.972	114.418	114.589	FDFT1	-1.10218	2.30778e-11	2.60179e-07	-0.939753	1.10194e-08	0.000146062	-0.115041	0.480834	1	-0.27747	0.0891156	1	0.295259	NA
ENSG00000079462	PAFAH1B3	12.1003	12.7924	12.2327	6.86845	6.89053	7.26956	57.0774	10.2976	10.8626	5.70697	5.04977	5.49545	PAFAH1B3	-0.822718	0.133823	1	1.07653	0.0503682	1	-0.373524	0.495311	1	-2.27277	6.61777e-05	0.578327	-2.1112	NA
ENSG00000079482	OPHN1	3.27373	3.27918	2.88434	4.6217	5.22696	5.23789	0.913737	3.90245	3.27259	5.33505	5.10615	4.51978	OPHN1	0.682169	0.0813073	1	-0.217002	0.581074	1	-0.012116	0.977733	1	0.887074	0.0232722	1	-4.08786	NA
ENSG00000079616	KIF22	108.93	108.287	107.676	34.5462	35.3212	35.6143	102.967	85.1039	84.4122	40.2131	39.5137	39.2954	KIF22	-1.62379	8.80981e-41	1.14898e-36	-0.254361	0.0319036	1	0.174385	0.144595	1	-1.19505	2.87498e-23	3.60005e-19	4.69824	NA
ENSG00000079689	SCGN	11.3507	10.6147	11.9406	0.100628	0.181704	0.186907	15.932	9.79271	8.96513	0.0730342	0.0599009	0.0595857	SCGN	-6.47676	2.67814e-68	3.56809e-64	0.0307218	0.905641	1	-1.8833	0.00282993	1	-8.38265	1.44958e-81	1.93794e-77	-272.857	NA
ENSG00000079691	CARMIL1	3.89215	3.31739	3.41706	10.466	9.69951	9.87971	1.89112	3.75099	3.54127	8.44818	8.16491	8.79878	CARMIL1	1.50745	8.79474e-12	9.98203e-08	-0.2011	0.361942	1	-0.242413	0.253881	1	1.46616	3.37359e-11	3.80743e-07	-7.29069	NA
ENSG00000079739	PGM1	187.076	191.27	188.03	151.57	153.271	152.337	236.415	152.589	154.351	148.787	148.882	148.765	PGM1	-0.309055	0.0665482	1	-0.0601492	0.721645	1	-0.0343166	0.838603	1	-0.283222	0.0925662	1	4.70866	NA
ENSG00000079785	DDX1	165.412	163.571	164.745	137.58	138.34	135.943	92.8353	148.601	147.567	134.447	135.35	138.702	DDX1	-0.261607	0.12657	1	-0.343653	0.0448479	1	-0.0118312	0.945093	1	0.0702152	0.68111	1	-0.20432	NA
ENSG00000079805	DNM2	172.964	175.319	177.788	154.148	157.389	154.298	204.495	165.127	163.486	142.01	143.032	143.162	DNM2	-0.175476	0.146974	1	0.0188965	0.87532	1	-0.121547	0.315001	1	-0.315919	0.00905826	1	-16.7184	NA
ENSG00000079819	EPB41L2	112.884	112.031	111.783	109.268	107.905	102.773	51.38	100.89	101.423	101.264	97.4892	96.8737	EPB41L2	-0.0736479	0.741515	1	-0.40806	0.067865	1	-0.114084	0.609253	1	0.22033	0.323406	1	-0.539945	NA
ENSG00000079950	STX7	49.2991	50.5204	49.7809	57.0551	55.2432	54.3086	24.0848	45.3194	48.0908	53.5885	52.3126	54.0279	STX7	0.155424	0.481147	1	-0.347798	0.115128	1	-0.0590484	0.789005	1	0.444177	0.0442151	1	-1.27711	NA
ENSG00000079974	RABL2B	10.9196	10.9776	10.7033	10.5763	11.0358	11.7139	8.25602	9.59076	9.70398	11.6302	11.7593	11.7537	RABL2B	0.0318714	0.79264	1	-0.240001	0.0459121	1	0.0768738	0.514099	1	0.348752	0.00335378	1	-1.45313	NA
ENSG00000079999	KEAP1	78.2899	78.2385	78.5478	61.7553	62.2929	63.9873	85.5645	69.7892	70.9785	55.5033	54.3282	54.7527	KEAP1	-0.322269	0.00656961	1	-0.0553024	0.643318	1	-0.192268	0.104948	1	-0.459234	0.000110332	0.942453	8.30406	NA
ENSG00000080031	PTPRH	76.191	77.4171	79.4586	72.8237	70.5017	71.6625	135.602	121.741	120.515	129.97	126.061	128.457	PTPRH	-0.116564	0.278348	1	0.697035	9.76875e-11	1.30374e-06	0.838958	6.62098e-15	8.90456e-11	0.0253538	0.813857	1	0.0363738	Dox.only
ENSG00000080189	SLC35C2	61.8549	64.1598	62.6177	81.6039	81.6967	86.1805	127.711	70.008	71.9188	90.0645	87.143	87.8	SLC35C2	0.40352	0.0576397	1	0.515162	0.015461	1	0.0871363	0.681281	1	-0.0245089	0.907429	1	-0.047575	NA
ENSG00000080200	CRYBG3	15.1361	15.1802	13.9168	19.9768	18.5219	17.0752	0.53232	11.8459	12.4579	16.5203	15.8471	17.8446	CRYBG3	0.329885	0.649724	1	-0.833891	0.253334	1	-0.146628	0.84002	1	1.01717	0.16466	1	-1.21979	NA
ENSG00000080293	SCTR	1.60587	1.75096	1.52676	0.141979	0.168068	0.172798	0.508481	0.688053	0.619434	0.0730342	0.0739965	0.1014	SCTR	-3.60562	1.18061e-39	1.53715e-35	-1.45264	3.99237e-11	5.33102e-07	-1.30919	0.0131595	1	-3.45726	1.52889e-18	1.8709e-14	2.37999	NA
ENSG00000080298	RFX3	16.0731	17.74	17.0444	31.1692	29.3351	27.8403	8.35137	24.9559	26.4793	44.7726	41.8677	43.7137	RFX3	0.797763	0.0178402	1	0.234965	0.485499	1	0.561693	0.0935683	1	1.12448	0.000880917	1	4.78573	NA
ENSG00000080345	RIF1	119.687	121.487	119.275	101.246	98.0733	94.3496	65.8977	116.625	120.969	92.1858	92.4289	97.3754	RIF1	-0.295683	0.14475	1	-0.247808	0.221321	1	-0.0585648	0.77273	1	-0.106439	0.600346	1	0.42952	NA
ENSG00000080371	RAB21	52.4849	51.4182	52.3758	72.9615	72.0016	73.1721	37.1245	54.3231	54.8077	78.7966	84.4507	83.3258	RAB21	0.481325	0.00192348	1	-0.0947478	0.540354	1	0.176859	0.252402	1	0.752932	1.29218e-06	0.012799	-7.94669	NA
ENSG00000080503	SMARCA2	45.8135	46.3369	47.6156	63.1337	60.5884	60.8833	20.7474	50.486	49.6357	55.5033	54.1027	55.3939	SMARCA2	0.401648	0.142998	1	-0.208963	0.44538	1	-0.162063	0.553881	1	0.44855	0.101821	1	-2.14655	NA
ENSG00000080546	SESN1	31.2713	32.5065	32.5276	22.0995	22.5445	22.9304	21.9632	29.9374	30.2408	22.7328	22.5707	22.0121	SESN1	-0.511735	0.000273154	1	-0.22805	0.103588	1	-0.00553307	0.970219	1	-0.289215	0.0405116	1	1.26821	NA
ENSG00000080561	MID2	0.0504495	0.127223	0.0660785	0.872518	0.836223	0.807698	0.127064	0.0821974	0.0485016	0.927078	0.962024	1.06313	MID2	3.99332	6.82851e-25	8.58343e-21	0.0288958	1	1	0.237969	0.256189	1	4.20155	2.38571e-28	3.04583e-24	145.403	NA
ENSG00000080603	SRCAP	2.71153	2.76341	2.42036	3.83602	4.35427	4.03863	1.10445	2.08489	2.21469	3.22749	2.80856	3.36292	SRCAP	0.637833	0.00428599	1	-0.536296	0.0201346	1	-0.382896	0.0802626	1	0.791333	0.000481159	1	-1.47555	NA
ENSG00000080608	PUM3	33.8761	34.8943	33.1635	15.3179	14.4311	14.1265	39.1985	31.1323	33.0115	15.9693	15.2268	16.2975	PUM3	-1.21773	8.56103e-22	1.06268e-17	0.0186693	0.879034	1	0.114537	0.367697	1	-1.12187	7.96949e-19	9.7666e-15	-60.0916	NA
ENSG00000080618	CPB2	107.243	112.127	109.102	9.22547	9.94496	9.08961	80.034	74.0639	71.7509	5.1973	5.78274	4.68704	CPB2	-3.54301	1.36924e-152	1.84656e-148	-0.540848	9.42532e-06	0.122001	-0.854943	9.77201e-11	1.30955e-06	-3.85707	1.19586e-173	1.6131e-169	7.13153	NA
ENSG00000080802	CNOT4	18.7342	19.6121	18.3504	22.6371	23.7444	22.2814	13.4767	22.3306	22.1973	26.1489	27.8425	26.8347	CNOT4	0.276736	0.130308	1	0.0351963	0.85459	1	0.235555	0.195449	1	0.477092	0.00888109	1	13.5552	NA
ENSG00000080815	PSEN1	54.6213	54.9331	56.1392	83.3131	83.2648	80.2266	51.9521	74.4846	77.0237	90.6706	93.1618	93.6818	PSEN1	0.575095	0.00017599	1	0.29705	0.0528666	1	0.169247	0.267143	1	0.44729	0.00342754	1	1.50577	NA
ENSG00000080819	CPOX	70.3067	68.2478	69.7321	59.0124	59.9203	59.7264	39.2462	58.6146	59.0393	57.3766	56.4003	56.7877	CPOX	-0.221469	0.161903	1	-0.408042	0.0100716	1	-0.0669231	0.672704	1	0.119652	0.448908	1	-0.293235	NA
ENSG00000080822	CLDND1	39.6668	41.4657	40.8621	61.9759	63.2883	63.3806	57.3873	36.484	39.51	78.4109	75.4999	77.1931	CLDND1	0.629227	0.000167651	1	0.127728	0.443399	1	0.292999	0.0779055	1	0.794496	2.12318e-06	0.0207732	6.22022	NA
ENSG00000080823	MOK	6.04725	6.37384	7.07736	8.7706	8.21321	8.68045	11.1643	5.34977	6.39593	8.47573	7.03726	7.80917	MOK	0.39773	0.10518	1	0.228603	0.350778	1	-0.138511	0.571219	1	0.0306096	0.911187	1	0.133899	NA
ENSG00000080824	HSP90AA1	1322.64	1336.1	1340.53	1048.96	1045.25	1027.6	1263.05	831.736	851.611	778.782	781.087	791.228	HSP90AA1	-0.357368	0.031361	1	-0.440847	0.00797461	1	-0.409058	0.0137891	1	-0.325578	0.0498482	1	0.738527	NA
ENSG00000080839	RBL1	42.4778	43.4906	42.0479	19.9217	19.7355	19.375	23.0836	45.1174	43.2379	21.8925	22.909	22.1654	RBL1	-1.11792	3.90919e-07	0.00398386	-0.199202	0.359222	1	0.1822	0.404624	1	-0.736515	0.000776919	1	3.69733	NA
ENSG00000080845	DLGAP4	43.8271	45.1907	44.6771	51.8724	52.0797	52.5591	47.2798	47.0696	45.5384	64.3881	63.5045	59.5892	DLGAP4	0.22746	0.0313585	1	0.0652449	0.539187	1	0.260628	0.0130945	1	0.422841	6.23101e-05	0.545774	6.48083	NA
ENSG00000080947	CROCCP3	2.05563	2.28584	2.02511	5.55899	5.44513	5.19556	1.15212	2.16903	2.04677	4.38458	4.6269	3.73925	CROCCP3	1.36047	1.52034e-10	1.68971e-06	-0.231426	0.288497	1	-0.347643	0.0853797	1	1.2443	5.80501e-09	6.25722e-05	-5.37667	NA
ENSG00000080986	NDC80	40.154	37.4732	38.1985	11.9684	12.0312	12.5181	22.8452	39.9677	40.2825	14.9362	15.9034	16.4926	NDC80	-1.66772	3.91202e-16	4.67487e-12	-0.166958	0.401036	1	0.375043	0.0626288	1	-1.12572	2.59324e-08	0.000274235	6.74252	NA
ENSG00000081014	AP4E1	15.4172	15.3904	15.4978	32.4786	31.8986	29.6745	3.39295	16.5413	18.3016	29.5513	30.1824	30.8907	AP4E1	1.02369	0.024008	1	-0.275487	0.540166	1	-0.0536104	0.905219	1	1.24557	0.00624177	1	-4.52134	NA
ENSG00000081019	RSBN1	30.5592	31.8188	31.7543	32.1065	31.0123	32.9195	22.3923	30.6442	31.2315	34.9649	35.722	35.2254	RSBN1	0.0289194	0.840368	1	-0.158231	0.266711	1	0.141325	0.320056	1	0.328476	0.0209928	1	-2.07592	NA
ENSG00000081026	MAGI3	20.6082	21.0639	21.3577	17.3441	16.3402	15.3681	8.68511	20.311	21.4081	16.4652	15.9034	16.7435	MAGI3	-0.362296	0.187508	1	-0.321216	0.241703	1	0.00175328	0.996075	1	-0.0393208	0.890234	1	0.122412	NA
ENSG00000081051	AFP	6809.24	6723.41	6739.47	2256.54	2230.2	2219.44	5549.72	4875.74	4864.9	1992.79	2011.55	2061.99	AFP	-1.59595	1.63871e-40	2.13655e-36	-0.406883	0.000511423	1	-0.144667	0.216091	1	-1.33373	3.47232e-29	4.44283e-25	3.27792	NA
ENSG00000081059	TCF7	44.2956	43.3186	44.0241	34.3395	35.7848	35.6143	108.259	56.0397	57.8806	43.7257	43.5873	42.0272	TCF7	-0.31632	0.16717	1	0.754972	0.00101119	1	0.290894	0.203623	1	-0.780404	0.000676648	1	-1.03369	NA
ENSG00000081087	OSTM1	14.4802	13.8239	13.4013	57.5926	56.034	57.9628	7.66006	16.4739	15.5309	57.2113	57.3729	60.8715	OSTM1	2.04304	9.02528e-17	1.08583e-12	-0.0698769	0.767505	1	0.032165	0.891817	1	2.14508	3.08164e-18	3.75991e-14	-30.698	NA
ENSG00000081154	PCNP	125.646	127.982	123.159	120.708	120.845	120.465	98.6519	133.034	137.223	136.72	134.8	137.768	PCNP	-0.0576882	0.676728	1	-0.0300859	0.827061	1	0.177096	0.200049	1	0.149494	0.279071	1	-4.96891	NA
ENSG00000081177	EXD2	21.8825	20.9111	19.1581	36.8619	36.1803	36.5596	16.7664	23.172	23.1881	38.8081	39.415	39.379	EXD2	0.824136	1.60867e-08	0.000170873	0.0294195	0.84911	1	0.101723	0.480122	1	0.896437	7.70123e-10	8.46519e-06	30.4709	NA
ENSG00000081181	ARG2	9.81398	9.94606	9.07077	14.1738	15.1947	14.2111	4.99013	13.0239	12.9617	21.2726	21.7954	20.9249	ARG2	0.597649	0.0419859	1	0.106648	0.722519	1	0.555199	0.0573862	1	1.04619	0.000382376	1	9.80977	NA
ENSG00000081307	UBA5	39.8354	39.6127	39.1609	46.4416	47.5389	47.1271	30.1637	35.4911	37.8476	44.2767	44.2357	46.2365	UBA5	0.250775	0.0382177	1	-0.195542	0.107186	1	-0.0665661	0.581213	1	0.379753	0.00171793	1	-1.94205	NA
ENSG00000081320	STK17B	2.99263	3.06905	2.90152	3.29846	2.78615	3.06512	1.10445	1.79879	1.62696	3.08974	3.40058	3.0284	STK17B	0.0303088	0.868689	1	-0.977684	1.11585e-07	0.00147113	0.0575894	0.74554	1	1.06572	3.53008e-09	3.82449e-05	-1.09005	NA
ENSG00000081377	CDC14B	88.6344	88.917	84.9404	62.5823	61.652	60.192	39.127	90.1695	88.2408	61.2061	56.8655	59.2547	CDC14B	-0.509429	0.0507886	1	-0.270663	0.298234	1	-0.0566657	0.827899	1	-0.29543	0.257123	1	1.09151	NA
ENSG00000081386	ZNF510	9.0269	8.1695	8.02251	12.6438	11.7176	11.7703	3.6075	9.35515	10.1742	12.1261	11.4069	12.0464	ZNF510	0.520362	0.0873426	1	-0.121224	0.68864	1	-0.0222786	0.942675	1	0.619311	0.0414721	1	-5.10881	NA
ENSG00000081665	ZNF506	1.19359	1.42621	1.50958	1.29981	1.36802	1.40027	4.99013	1.14244	1.22395	1.58827	1.48356	1.36977	ZNF506	-0.0223587	0.972006	1	0.837816	0.0891939	1	0.129507	0.797607	1	-0.730839	0.137116	1	-0.872314	NA
ENSG00000081692	JMJD4	3.59231	3.20277	3.24521	2.45765	2.43161	2.59953	10.9259	4.2727	3.82673	2.41477	3.01999	3.18172	JMJD4	-0.427397	0.234716	1	0.923806	0.00977227	1	0.204632	0.566394	1	-1.14665	0.00133598	1	-1.24123	NA
ENSG00000081721	DUSP12	12.044	12.3148	13.0232	13.3882	13.6403	13.9713	19.1503	18.5776	18.3016	19.1237	19.6388	18.667	DUSP12	0.133207	0.221505	1	0.584092	7.77542e-08	0.00102597	0.487104	4.6781e-06	0.0619006	0.0361987	0.738353	1	0.0619743	Dox.only
ENSG00000081760	AACS	59.9247	58.7346	57.0671	56.1178	54.125	55.1833	52.5481	62.6536	62.7503	52.8723	51.1708	52.2578	AACS	-0.0871581	0.454933	1	0.0188609	0.874975	1	-0.0818995	0.482168	1	-0.187918	0.107858	1	-9.96338	NA
ENSG00000081791	DELE1	32.6768	33.9201	33.2322	59.0399	59.2385	59.2749	30.3544	30.1394	29.821	53.3131	51.6924	51.0173	DELE1	0.831301	2.34084e-15	2.77667e-11	-0.144731	0.172155	1	-0.18659	0.0716067	1	0.789444	6.40848e-14	7.51843e-10	-5.45455	NA
ENSG00000081803	CADPS2	31.1026	33.3661	31.7372	14.4633	14.9902	14.6626	10.5207	29.2811	28.7631	13.2969	12.0412	12.6457	CADPS2	-1.12639	0.00030499	1	-0.488013	0.113724	1	-0.216388	0.484691	1	-0.854756	0.00600411	1	1.7515	NA
ENSG00000081853	PCDHGA2	0.462729	0.24184	0.255108	1.05171	1.01349	0.962895	0.127064	0.26732	0.384344	0.65158	0.651919	0.672862	PCDHGA2	1.7602	8.52858e-09	9.1145e-05	-0.265705	0.525625	1	-0.639424	0.0158338	1	1.3869	1.80023e-05	0.165657	-5.2197	NA
ENSG00000081870	HSPB11	23.438	23.872	22.6809	16.4895	16.2447	15.2693	31.6893	17.3659	16.6223	13.9719	12.7883	13.6353	HSPB11	-0.544827	0.0159279	1	-0.0937507	0.681713	1	-0.249455	0.270105	1	-0.700525	0.00198995	1	7.47221	NA
ENSG00000081913	PHLPP1	67.8143	70.5592	68.8729	45.4354	44.6345	42.7534	31.5702	58.6819	59.6942	42.6237	41.9522	41.9993	PHLPP1	-0.64218	0.00259434	1	-0.466368	0.0283557	1	-0.0695632	0.74389	1	-0.245372	0.249621	1	0.526134	NA
ENSG00000081923	ATP8B1	10.4137	10.118	10.6346	7.72304	8.21321	7.38243	3.4883	8.69881	8.69645	5.7483	6.06466	6.19235	ATP8B1	-0.419902	0.138551	1	-0.575518	0.042436	1	-0.374752	0.187431	1	-0.219098	0.448086	1	0.380697	NA
ENSG00000082014	SMARCD3	0.369029	0.37556	0.478507	0.927653	0.958946	1.23096	0.556158	0.233661	0.518681	0.858204	0.905641	0.951624	SMARCD3	1.41122	1.244e-06	0.0124101	0.0697938	0.835179	1	-0.204893	0.429446	1	1.13648	0.000142229	1	16.2835	NA
ENSG00000082068	WDR70	21.995	20.5863	21.7529	20.983	20.2536	20.1228	38.4118	21.304	21.1562	19.7298	21.6122	20.9249	WDR70	-0.0684215	0.753074	1	0.328846	0.128662	1	0.0212003	0.923008	1	-0.376072	0.0820058	1	-1.14361	NA
ENSG00000082146	STRADB	41.8781	41.8286	40.7762	35.6903	35.8803	34.6549	31.5463	35.205	35.6982	31.2319	32.2826	32.8838	STRADB	-0.228943	0.0373159	1	-0.280366	0.0110349	1	-0.140197	0.202384	1	-0.0887702	0.424421	1	0.316622	NA
ENSG00000082153	BZW1	188.331	194.116	186.896	367.617	364.504	357.113	74.5511	157.302	153.797	331.8	329.842	335.87	BZW1	0.936053	9.1281e-05	0.822898	-0.561839	0.0182635	1	-0.126917	0.5926	1	1.37098	1.37464e-08	0.000146454	-2.44016	NA
ENSG00000082196	C1QTNF3	1.28729	1.3498	1.90482	1.06549	1.10894	1.01933	1.98647	1.20976	1.10641	1.20258	1.06069	1.09101	C1QTNF3	-0.523229	0.0441484	1	-0.102122	0.752877	1	0.0727404	0.787616	1	-0.348349	0.168246	1	3.41112	NA
ENSG00000082212	ME2	23.8502	23.9102	24.9149	27.9989	27.5215	27.2618	14.6686	26.925	27.4197	30.4054	31.7893	31.044	ME2	0.188044	0.367989	1	-0.0730279	0.724978	1	0.171776	0.409564	1	0.432847	0.0378852	1	-5.92715	NA
ENSG00000082213	C5orf22	15.8857	14.7982	14.7245	23.2435	22.5445	22.0698	7.44551	19.1666	19.1076	24.8816	23.5574	23.9634	C5orf22	0.580515	0.0455341	1	0.011774	0.972025	1	0.0936453	0.746208	1	0.662385	0.0223512	1	56.2581	NA
ENSG00000082258	CCNT2	47.3314	47.1392	46.8252	62.9959	60.0021	56.1145	18.1729	50.6038	48.9304	58.2169	58.9657	59.8541	CCNT2	0.342343	0.263928	1	-0.263009	0.390387	1	-0.0168282	0.956409	1	0.588526	0.0551807	1	-2.23766	NA
ENSG00000082269	FAM135A	45.2513	45.8975	45.4848	31.9273	30.726	30.4081	12.547	53.1282	55.4458	36.0531	37.3993	37.1628	FAM135A	-0.554498	0.181618	1	-0.17351	0.67491	1	0.249516	0.546988	1	-0.131472	0.751546	1	0.757718	NA
ENSG00000082438	COBLL1	101.209	100.933	97.9663	62.7202	61.4611	57.3561	29.8776	96.5478	99.2732	52.5554	54.6806	55.0733	COBLL1	-0.725491	0.0383566	1	-0.410909	0.239028	1	-0.161607	0.643217	1	-0.476187	0.173093	1	1.15886	NA
ENSG00000082458	DLG3	16.6916	15.9634	16.3398	19.3841	19.1355	18.8671	15.2646	15.9859	18.1336	20.2395	20.3154	20.9946	DLG3	0.228456	0.0457921	1	0.0129495	0.919571	1	0.101171	0.371278	1	0.316675	0.00547163	1	24.4546	NA
ENSG00000082512	TRAF5	1.21233	1.44532	1.13152	1.68576	1.25893	1.48492	0.436965	0.620735	0.720187	1.78112	1.59633	1.82973	TRAF5	0.232707	0.256184	1	-1.09901	2.32326e-06	0.030307	0.238267	0.220366	1	1.57036	1.48455e-12	1.71317e-08	-1.42888	NA
ENSG00000082515	MRPL22	28.1417	28.0364	28.0081	19.5495	20.3218	19.248	66.446	24.8549	25.1024	20.2808	21.5417	21.803	MRPL22	-0.510599	0.120743	1	0.467087	0.155061	1	0.106126	0.747094	1	-0.871566	0.00830704	1	-1.86596	NA
ENSG00000082516	GEMIN5	59.5687	58.7346	58.0982	25.9314	25.8989	25.6958	18.6496	54.5755	56.5876	24.6888	24.967	25.3712	GEMIN5	-1.18704	0.000322205	1	-0.442102	0.175065	1	-0.0473283	0.885176	1	-0.792262	0.0156972	1	1.79203	NA
ENSG00000082641	NFE2L1	342.111	334.846	335.319	287.023	281.339	278.611	138.415	331.249	332.315	289.746	284.201	281.01	NFE2L1	-0.25724	0.345185	1	-0.335886	0.2179	1	0.013535	0.960425	1	0.0921819	0.73491	1	-0.274444	NA
ENSG00000082701	GSK3B	42.9463	45.1334	44.2647	76.2558	73.6652	72.5796	24.9192	42.6099	46.3276	75.9314	74.9502	73.7225	GSK3B	0.749909	0.0002029	1	-0.216186	0.282214	1	0.0135802	0.946315	1	0.979676	1.31902e-06	0.0130583	-4.53165	NA
ENSG00000082781	ITGB5	144.311	145.824	148.025	195.444	193.442	199.503	129.833	128.389	124.713	163.815	161.639	163.721	ITGB5	0.425376	2.46893e-05	0.231092	-0.194471	0.054274	1	-0.266462	0.00809457	1	0.353386	0.000464527	1	-1.81716	NA
ENSG00000082805	ERC1	34.3634	35.1235	35.5349	67.2275	62.1702	61.6029	18.1967	29.3315	30.3247	57.845	55.9915	55.7702	ERC1	0.863428	2.01235e-06	0.01988	-0.43067	0.0176156	1	-0.171469	0.341027	1	1.12263	8.04614e-10	8.8419e-06	-2.60671	NA
ENSG00000082898	XPO1	241.253	243.535	240.185	176.519	171.979	166.982	82.6324	223.003	227.918	184.836	185.996	183.806	XPO1	-0.492082	0.106146	1	-0.442204	0.146282	1	0.105645	0.728154	1	0.0557674	0.854261	1	-0.126113	NA
ENSG00000082996	RNF13	28.1604	30.3669	28.8845	28.6192	27.7261	27.276	29.1386	40.4052	39.6444	34.1659	34.7494	35.9781	RNF13	-0.063988	0.656581	1	0.322487	0.0250654	1	0.327288	0.0221317	1	-0.0591934	0.682988	1	-0.183553	NA
ENSG00000083093	PALB2	32.0771	32.5065	31.5138	17.4406	16.9265	16.1017	24.0848	39.7152	39.1238	15.7489	16.6223	16.8271	PALB2	-0.930279	3.84963e-07	0.00392509	0.100355	0.58349	1	-0.0368775	0.841589	1	-1.06751	6.2642e-09	6.74216e-05	-10.6374	NA
ENSG00000083097	DOP1A	10.1513	10.672	10.9782	20.2662	18.8901	18.1334	2.77315	14.4039	13.8013	20.0329	19.4978	20.0608	DOP1A	0.850971	0.0586873	1	-0.0362792	0.935216	1	0.0569158	0.899066	1	0.944165	0.0359877	1	-26.0249	NA
ENSG00000083099	LYRM2	21.4515	22.6685	22.5606	37.9232	39.6574	39.0428	41.2009	22.0613	21.5928	39.1938	38.2733	39.1699	LYRM2	0.807336	0.000385256	1	0.346647	0.12607	1	0.000168516	1	1	0.460852	0.0421378	1	1.32946	NA
ENSG00000083123	BCKDHB	13.5058	14.2824	13.006	18.9981	18.8219	18.3874	7.85076	9.80954	9.35135	14.8673	15.1705	14.4576	BCKDHB	0.463558	0.000148839	1	-0.592106	2.37527e-06	0.0309782	-0.337739	0.00524896	1	0.717947	7.94941e-09	8.53131e-05	-1.21253	NA
ENSG00000083168	KAT6A	53.5344	55.3725	51.1557	93.8852	87.901	83.2741	45.0866	59.3887	60.8025	86.304	87.439	89.4447	KAT6A	0.728061	1.84514e-07	0.00190252	0.0471266	0.738534	1	-0.0102405	0.941514	1	0.670693	1.50735e-06	0.01487	14.2317	NA
ENSG00000083223	TUT7	21.6577	22.9742	21.1171	30.1768	27.4261	27.3747	10.3061	24.9896	25.1024	29.7993	30.3233	29.9568	TUT7	0.370589	0.181302	1	-0.121123	0.661086	1	0.0841994	0.761087	1	0.575913	0.0377803	1	-4.75477	NA
ENSG00000083312	TNPO1	114.664	119.271	115.271	134.837	129.449	125.22	54.0738	143.906	143.722	152.603	155.31	160.738	TNPO1	0.157604	0.597183	1	-0.0311071	0.916742	1	0.266922	0.370754	1	0.455633	0.126995	1	-14.6472	NA
ENSG00000083444	PLOD1	530.261	528.74	530.741	359.829	366.508	373.79	562.527	509.506	505.307	325.739	317.354	317.458	PLOD1	-0.53116	1.18224e-06	0.0118117	-0.0113528	0.917377	1	-0.195751	0.0727755	1	-0.715558	6.59025e-11	7.39295e-07	63.0294	NA
ENSG00000083457	ITGAE	6.60945	6.66038	6.97426	5.62791	5.51331	6.14085	14.4302	6.32587	7.40346	4.5361	5.6136	5.59301	ITGAE	-0.229436	0.408152	1	0.474228	0.0853588	1	-0.135343	0.626739	1	-0.839019	0.00243587	1	-1.76923	NA
ENSG00000083520	DIS3	41.9156	42.3253	41.0683	43.7537	41.771	42.2455	23.5604	42.3911	41.8441	40.8468	42.1073	42.5847	DIS3	0.0280907	0.889544	1	-0.216238	0.281735	1	-0.0254379	0.899739	1	0.218893	0.275382	1	-1.01228	NA
ENSG00000083535	PIBF1	11.8004	11.7226	12.4561	10.659	10.3404	10.4864	6.58732	11.3578	11.1985	10.8588	10.5471	10.5271	PIBF1	-0.193082	0.312424	1	-0.300742	0.114785	1	0.0204169	0.917094	1	0.128085	0.497904	1	-0.425897	NA
ENSG00000083544	TDRD3	9.88894	10.2135	9.5863	11.169	10.5722	10.9802	9.25724	10.7183	11.6183	10.7899	11.7734	11.4749	TDRD3	0.140945	0.267309	1	0.0934993	0.476572	1	0.057049	0.650221	1	0.10449	0.402631	1	1.11755	NA
ENSG00000083635	NUFIP1	14.5177	14.2824	13.2982	7.36466	6.98598	7.56585	15.4314	14.5386	15.279	7.56658	6.96678	7.51647	NUFIP1	-0.944362	2.9764e-16	3.56097e-12	0.104113	0.360934	1	0.00899523	0.945681	1	-1.03948	2.13464e-19	2.62369e-15	-9.98417	NA
ENSG00000083642	PDS5B	40.5288	41.351	40.2435	48.6745	48.3571	43.6705	21.0573	35.003	36.3363	44.869	44.2076	45.6093	PDS5B	0.204465	0.281915	1	-0.401426	0.0349682	1	-0.0630959	0.739784	1	0.5428	0.00435499	1	-1.35218	NA
ENSG00000083720	OXCT1	5.24143	4.90292	5.29017	5.25575	5.93602	6.81808	3.08305	4.32318	3.80994	5.88605	5.52902	5.37	OXCT1	0.223322	0.16872	1	-0.456608	0.00600711	1	-0.101883	0.526109	1	0.578084	0.000427113	1	-1.26604	NA
ENSG00000083750	RRAGB	9.308	8.99092	8.84737	14.2703	14.2675	14.7332	3.65517	6.69612	7.521	11.0379	11.5479	11.8233	RRAGB	0.674458	0.00209754	1	-0.599368	0.00676124	1	-0.331385	0.127681	1	0.942471	1.9998e-05	0.183287	-1.57244	NA
ENSG00000083799	CYLD	12.3626	13.7475	13.0748	46.3864	45.2754	45.8715	7.54086	18.9479	18.7549	50.5443	50.4237	50.0695	CYLD	1.81377	3.90582e-10	4.30499e-06	0.209817	0.461853	1	0.135211	0.629944	1	1.73916	1.72133e-09	1.87952e-05	8.28893	NA
ENSG00000083807	SLC27A5	8.87698	8.74258	8.05688	4.18062	4.3679	5.05447	34.6215	8.53051	7.77288	4.02643	4.13355	4.0877	SLC27A5	-0.920987	0.0563024	1	0.989133	0.0398059	1	-0.152453	0.751727	1	-2.06259	3.189e-05	0.28717	-2.08525	NA
ENSG00000083812	ZNF324	5.50379	4.80741	4.55124	9.63898	10.1086	9.85149	7.9938	6.24173	5.72424	9.86699	8.8556	9.04966	ZNF324	0.998835	2.03666e-10	2.25825e-06	0.42257	0.00834833	1	-0.0921526	0.546464	1	0.484088	0.00197715	1	1.14558	NA
ENSG00000083817	ZNF416	3.49861	3.90958	4.00133	5.4625	4.62698	4.99803	5.13317	4.84489	4.3305	5.89982	5.09206	5.87178	ZNF416	0.405259	0.00591709	1	0.324945	0.0293016	1	0.161679	0.25443	1	0.241959	0.0975227	1	0.744614	NA
ENSG00000083828	ZNF586	1.56839	1.57904	1.69861	1.87873	1.61347	1.90819	1.27132	1.54635	1.89564	2.23569	2.0192	1.78791	ZNF586	0.157588	0.416696	1	-0.0273664	0.906376	1	0.165361	0.366496	1	0.350295	0.0552869	1	-12.8002	NA
ENSG00000083838	ZNF446	2.88019	2.85892	2.98745	4.40116	4.69516	4.6312	4.17962	3.66684	3.82673	4.38458	4.20403	4.50584	ZNF446	0.658424	5.71326e-07	0.00578296	0.417954	0.0022365	1	-0.0685093	0.586629	1	0.171921	0.195175	1	0.411339	NA
ENSG00000083844	ZNF264	14.4802	14.397	14.862	22.0857	21.7263	20.8705	11.1882	16.1037	15.9674	24.3031	24.5441	24.4791	ZNF264	0.56535	0.000154376	1	-0.0128377	0.926898	1	0.181173	0.219838	1	0.759358	3.58674e-07	0.00364807	-59.1509	NA
ENSG00000083845	RPS5	725.082	696.615	710.732	452.745	457.255	468.009	2973.63	705.096	674.589	447.895	433.601	437.772	RPS5	-0.629946	0.185225	1	1.02963	0.0314193	1	-0.0628518	0.894458	1	-1.72243	0.000404134	1	-1.67286	NA
ENSG00000083857	FAT1	341.587	349.785	337.45	234.838	222.432	210.734	75.4093	321.657	323.012	195.925	192.113	196.921	FAT1	-0.623132	0.131742	1	-0.514741	0.212524	1	-0.191547	0.642035	1	-0.299937	0.466964	1	0.582695	NA
ENSG00000083896	YTHDC1	74.5232	78.1812	76.6059	70.5907	69.4653	67.2605	60.4387	68.729	71.499	73.7137	72.9204	73.2625	YTHDC1	-0.145515	0.195895	1	-0.192046	0.0881433	1	0.0850201	0.449366	1	0.131552	0.241857	1	-0.685	NA
ENSG00000083937	CHMP2B	27.3359	24.5024	25.5851	32.4235	32.5395	33.0183	17.7915	25.8142	24.2124	34.9649	37.0047	36.4799	CHMP2B	0.340077	0.0223493	1	-0.189383	0.203982	1	0.146568	0.322284	1	0.676029	5.81612e-06	0.0554334	-3.56964	NA
ENSG00000084070	SMAP2	73.0614	70.3873	71.9661	67.9029	68.6336	68.8266	66.2791	73.7609	74.5384	65.1457	66.5492	66.0008	SMAP2	-0.0689803	0.520723	1	-0.00520794	0.960756	1	-0.0549216	0.608733	1	-0.118694	0.269968	1	22.7909	NA
ENSG00000084072	PPIE	15.7358	15.4095	15.0338	13.6914	13.1085	13.2658	50.8317	18.8805	19.2587	15.3219	17.6654	15.8515	PPIE	-0.205283	0.537069	1	0.946396	0.00460655	1	0.286232	0.388711	1	-0.865467	0.00940112	1	-0.914487	NA
ENSG00000084073	ZMPSTE24	47.4439	45.9357	46.3784	57.2067	58.2703	57.1303	35.8849	45.656	47.9565	48.5745	48.1261	48.1321	ZMPSTE24	0.304743	0.020141	1	-0.109023	0.405596	1	-0.253252	0.0529138	1	0.160516	0.220235	1	-1.47231	NA
ENSG00000084090	STARD7	219.777	219.523	219.186	146.884	146.753	145.805	147.664	198.584	205.836	131.348	135.378	135.148	STARD7	-0.583577	2.61226e-05	0.244142	-0.254037	0.0663801	1	-0.128957	0.351625	1	-0.458496	0.000949537	1	1.80484	NA
ENSG00000084092	NOA1	42.7027	43.6816	44.0413	23.4916	25.0125	24.7364	53.6447	50.9236	49.4678	27.6504	26.4752	26.319	NOA1	-0.833309	1.69309e-14	1.99108e-10	0.239812	0.0256952	1	0.135528	0.21212	1	-0.937595	5.34737e-18	6.51416e-14	-3.90972	NA
ENSG00000084093	REST	36.0312	38.0272	35.3975	98.2271	92.1144	91.5983	27.8513	40.4726	40.6015	88.935	88.7217	94.323	REST	1.36581	4.07659e-18	4.9502e-14	-0.00573038	0.968536	1	-0.0519072	0.736602	1	1.31963	4.65186e-17	5.63294e-13	-230.287	NA
ENSG00000084110	HAL	18.1533	16.8804	18.5738	4.05656	4.10882	4.10918	22.0347	26.0162	26.8991	2.74537	2.94951	2.7357	HAL	-2.13508	1.25046e-54	1.65248e-50	0.485367	0.000137732	1	-0.546952	0.000150693	1	-3.16736	3.21633e-108	4.32017e-104	-6.52569	NA
ENSG00000084112	SSH1	19.3339	20.1278	20.0001	27.4751	27.8624	27.6851	7.61238	22.3642	23.1377	24.3306	23.8111	23.0156	SSH1	0.482153	0.138607	1	-0.161689	0.618406	1	-0.222752	0.492823	1	0.421095	0.195074	1	-2.60435	NA
ENSG00000084234	APLP2	747.27	754.401	752.576	1097.99	1091.14	1106.59	512.323	736.18	731.514	1037.25	1040.26	1033.11	APLP2	0.547968	0.000305932	1	-0.187072	0.216602	1	-0.0833913	0.581589	1	0.651648	1.80236e-05	0.165835	-3.48341	NA
ENSG00000084444	FAM234B	9.64532	8.81899	9.39727	18.7087	18.5901	17.2304	4.58488	6.71295	7.45383	18.6554	18.1587	17.9143	FAM234B	0.970951	7.00151e-09	7.50002e-05	-0.567022	0.000892497	1	0.0052488	0.976215	1	1.54324	1.2965e-19	1.5956e-15	-2.72166	NA
ENSG00000084463	WBP11	94.5375	94.4568	93.5842	75.0015	73.9379	73.2145	40.4381	79.2978	79.2066	74.3473	74.6542	73.1092	WBP11	-0.347214	0.11735	1	-0.505925	0.0226713	1	-0.000280828	0.999315	1	0.158432	0.474084	1	-0.313153	NA
ENSG00000084623	EIF3I	183.028	177.974	181.363	170.95	168.189	175.588	243.734	174.451	171.513	162.19	164.585	163.777	EIF3I	-0.0754713	0.608934	1	0.120465	0.41377	1	-0.069416	0.637874	1	-0.265352	0.0720073	1	-2.20274	NA
ENSG00000084636	COL16A1	32.4894	31.6659	31.7372	5.61413	5.2815	5.13912	23.6081	30.3581	30.2072	5.27995	4.78195	5.04943	COL16A1	-2.58685	2.61217e-73	3.48621e-69	-0.186764	0.162063	1	-0.0860327	0.556685	1	-2.4861	8.67449e-68	1.15544e-63	13.3114	NA
ENSG00000084652	TXLNA	64.7971	68.1714	66.7248	102.321	100.037	100.416	54.1453	59.8431	60.4666	80.9317	80.7717	79.3674	TXLNA	0.60068	2.00871e-08	0.000212803	-0.19454	0.0698204	1	-0.328894	0.00201439	1	0.466327	1.34776e-05	0.125355	-2.39708	NA
ENSG00000084674	APOB	8798.74	9033.38	8774.86	2423.38	2297.08	2161.43	3042.57	9222.9	9273.29	1934.46	1872.42	1923.99	APOB	-1.95094	1.6995e-08	0.000180436	-0.304867	0.361762	1	-0.264056	0.429484	1	-1.91013	3.21043e-08	0.000338443	6.26545	NA
ENSG00000084676	NCOA1	23.1194	23.9102	22.32	60.9145	59.0885	55.7053	30.9503	31.8055	32.3902	64.0162	62.546	62.4884	NCOA1	1.34252	6.93419e-34	8.9465e-30	0.457202	3.65747e-05	0.468705	0.105628	0.326363	1	0.990939	1.35851e-19	1.67179e-15	2.1674	NA
ENSG00000084693	AGBL5	77.7839	76.8058	76.2279	83.2717	84.7784	83.5422	96.8402	63.9326	61.6085	73.2178	70.4396	72.8165	AGBL5	0.124385	0.464123	1	-0.0544071	0.750871	1	-0.216977	0.201282	1	-0.0381839	0.821129	1	0.701818	NA
ENSG00000084710	EFR3B	1.60587	1.3689	1.3721	3.18819	3.15431	2.98046	0.69919	1.14244	1.25754	2.22192	2.44207	2.3315	EFR3B	1.11774	1.64514e-09	1.78662e-05	-0.470133	0.0216141	1	-0.419309	0.0161418	1	1.16871	2.11619e-09	2.30495e-05	-2.48592	NA
ENSG00000084731	KIF3C	15.3423	15.9634	15.515	60.1288	58.6794	60.9397	11.951	20.8327	19.9136	70.6419	69.8617	67.9242	KIF3C	1.94281	1.68228e-23	2.1042e-19	0.173264	0.367196	1	0.213675	0.25328	1	1.98322	1.91339e-24	2.40647e-20	11.4462	NA
ENSG00000084733	RAB10	132.261	129.95	131.046	136.174	135.026	136.93	138.081	159.473	156.199	141.114	142.609	145.323	RAB10	0.0535654	0.620362	1	0.206704	0.0561401	1	0.0721196	0.504104	1	-0.0810191	0.45391	1	-0.391958	NA
ENSG00000084734	GCKR	12.1003	12.6204	11.9578	6.20683	5.66331	6.08442	22.4877	15.3632	15.2622	6.36817	6.5721	6.4293	GCKR	-1.03422	1.01078e-09	1.10438e-05	0.532664	0.00132545	1	0.110006	0.520935	1	-1.45689	7.04499e-18	8.57587e-14	-2.7351	NA
ENSG00000084754	HADHA	403.016	398.783	399.194	245.079	240.649	239.53	425.908	342.677	347.478	211.821	212.439	209.856	HADHA	-0.727731	2.38016e-09	2.57605e-05	-0.105943	0.382768	1	-0.193774	0.110466	1	-0.815562	2.3972e-11	2.71147e-07	7.69814	NA
ENSG00000084764	MAPRE3	0.425249	0.662102	0.90812	4.49764	4.31336	4.82873	1.22364	0.822687	0.770564	4.06776	4.14765	3.89256	MAPRE3	2.82137	1.27324e-30	1.62988e-26	0.485694	0.0675138	1	-0.172986	0.411503	1	2.16246	1.43746e-19	1.76865e-15	4.45231	NA
ENSG00000084774	CAD	75.1228	76.3283	74.4063	35.0286	34.7485	35.6566	62.3696	80.0719	82.649	34.6343	36.0603	35.2812	CAD	-1.09972	1.20651e-16	1.44962e-12	-0.00428343	0.972715	1	0.00740259	0.956359	1	-1.08803	2.54802e-16	3.06679e-12	254.01	NA
ENSG00000085063	CD59	55.1085	52.2205	53.0975	96.4904	96.5734	95.4077	53.7639	40.826	40.0138	80.5874	81.8148	80.3709	CD59	0.846874	4.97552e-10	5.47207e-06	-0.254463	0.0623114	1	-0.248907	0.0651546	1	0.852433	4.3059e-10	4.76232e-06	-3.34993	NA
ENSG00000085185	BCORL1	12.5125	13.5374	13.2122	32.5751	33.194	31.5509	5.896	9.91052	10.9466	27.9397	26.6162	27.6292	BCORL1	1.31156	4.03511e-11	4.53062e-07	-0.550529	0.00557036	1	-0.244111	0.209708	1	1.618	7.49679e-16	8.9804e-12	-2.93898	NA
ENSG00000085224	ATRX	78.5335	76.3283	76.6919	108.138	105.641	102.758	89.6886	73.7778	74.2362	90.5604	91.2025	90.9221	ATRX	0.451186	0.000126777	1	0.0372669	0.750749	1	-0.21521	0.0666139	1	0.198709	0.0917486	1	5.33206	NA
ENSG00000085231	AK6	12.7936	12.3912	11.8031	9.2806	8.99045	9.00496	25.6105	13.9327	15.3629	12.1123	13.2675	13.3426	AK6	-0.440581	0.0385233	1	0.568809	0.00728652	1	0.506928	0.016945	1	-0.502485	0.0173209	1	-0.883398	NA
ENSG00000085274	MYNN	7.41527	8.11219	7.23202	8.99114	9.00408	8.70867	8.99502	5.98929	7.13478	9.57772	9.64496	8.82665	MYNN	0.231788	0.144966	1	-0.0463793	0.79042	1	0.0711201	0.652074	1	0.349286	0.0293348	1	-7.53108	NA
ENSG00000085365	SCAMP1	43.6397	45.9357	44.1444	62.2102	60.0839	58.2873	18.006	49.4594	50.6264	62.432	61.5452	63.8682	SCAMP1	0.433691	0.161088	1	-0.178745	0.562767	1	0.0569246	0.853921	1	0.669362	0.0308581	1	-3.74478	NA
ENSG00000085377	PREP	44.2768	45.5728	45.502	45.7386	45.9844	46.5064	30.5213	40.4389	38.6872	39.8412	40.5004	40.3407	PREP	0.0303618	0.816559	1	-0.302843	0.020414	1	-0.195987	0.13201	1	0.137221	0.291755	1	-0.45311	NA
ENSG00000085382	HACE1	15.005	15.1802	14.587	21.9754	22.4354	21.9851	3.70285	12.4349	12.4075	24.6612	25.0374	24.8137	HACE1	0.569446	0.103391	1	-0.648485	0.064277	1	0.166596	0.632468	1	1.38454	9.43984e-05	0.811865	-2.13504	NA
ENSG00000085415	SEH1L	53.7405	56.1939	57.0499	50.4113	50.4706	50.1182	29.3532	54.1716	54.4886	58.3684	56.1607	57.3313	SEH1L	-0.145254	0.487403	1	-0.274231	0.189621	1	0.186792	0.371432	1	0.315771	0.130776	1	-1.15148	NA
ENSG00000085433	WDR47	8.1836	9.02912	8.09125	19.0946	18.1128	18.345	1.89112	6.78026	6.27838	18.7518	18.7931	19.0572	WDR47	1.13732	0.00140023	1	-0.758049	0.0329537	1	0.0270473	0.939276	1	1.92245	1.23332e-07	0.00127452	-2.53605	NA
ENSG00000085449	WDFY1	92.6822	96.73	94.959	140.709	134.563	133.403	30.259	82.8993	83.2703	134.241	134.702	139.05	WDFY1	0.523314	0.0870637	1	-0.533555	0.081167	1	-0.00240876	0.993825	1	1.05446	0.000625335	1	-1.9763	NA
ENSG00000085465	OVGP1	2.24303	2.07571	1.85327	0.693329	0.468056	0.624282	6.18206	2.74123	2.50015	0.458732	0.553249	0.547419	OVGP1	-1.84219	6.55758e-07	0.0066225	0.891424	0.0102151	1	-0.206486	0.593573	1	-2.94006	1.02448e-14	1.21319e-10	-3.29816	NA
ENSG00000085491	SLC25A24	23.0444	24.8271	24.2791	31.4311	30.7396	29.1524	5.63378	19.133	19.6449	29.1105	28.3358	29.3714	SLC25A24	0.340345	0.341837	1	-0.699639	0.0516163	1	-0.073065	0.838369	1	0.966931	0.00734475	1	-1.38204	NA
ENSG00000085511	MAP3K4	43.0025	45.7829	45.2614	46.6621	45.4254	46.1395	22.6545	45.7738	47.5367	45.668	45.5184	45.916	MAP3K4	0.0443285	0.85104	1	-0.208291	0.375704	1	-0.0117929	0.96046	1	0.240828	0.305489	1	-1.15621	NA
ENSG00000085563	ABCB1	74.4669	75.0102	75.5405	89.9569	89.9736	85.6021	41.0817	101.142	99.9113	121.471	126.202	124.137	ABCB1	0.238938	0.388763	1	0.106188	0.702377	1	0.485815	0.0799742	1	0.618564	0.0259989	1	5.8252	NA
ENSG00000085644	ZNF213	9.55162	9.50669	8.64115	18.5157	17.1174	18.3027	25.2529	12.1825	13.1464	21.3828	21.3021	20.3395	ZNF213	0.963774	0.000104665	0.93968	0.868668	0.000471336	1	0.225023	0.358437	1	0.320103	0.194209	1	0.368498	NA
ENSG00000085662	AKR1B1	92.7947	91.2475	93.842	54.6705	56.184	57.61	114.075	69.217	64.6143	54.7456	54.9062	55.7005	AKR1B1	-0.722347	0.000277086	1	-0.1653	0.404198	1	-0.026914	0.892225	1	-0.58396	0.00323942	1	3.53272	NA
ENSG00000085719	CPNE3	97.4234	98.2583	98.1553	163.328	159.271	156.344	43.108	87.3927	88.5934	141.225	141.242	146.117	CPNE3	0.705006	0.00239449	1	-0.423121	0.067714	1	-0.160308	0.487776	1	0.96782	3.31838e-05	0.298388	-2.28734	NA
ENSG00000085721	RRN3	71.3374	72.6796	71.021	78.158	77.3468	76.3748	23.8941	78.9612	81.5743	83.8796	85.1837	85.6814	RRN3	0.10883	0.758132	1	-0.221241	0.531024	1	0.135725	0.700781	1	0.465797	0.187861	1	-2.10538	NA
ENSG00000085733	CTTN	125.252	125.48	122.489	170.743	174.079	177.86	67.2803	85.2554	85.7892	136.445	134.067	132.722	CTTN	0.486013	8.6802e-05	0.783475	-0.646699	2.01014e-07	0.00264534	-0.374387	0.00245351	1	0.758327	1.10891e-09	1.21548e-05	-1.17261	NA
ENSG00000085760	MTIF2	70.1568	71.4379	71.5709	57.5788	56.5658	55.5078	61.5591	87.1907	91.6496	63.8646	66.225	67.5061	MTIF2	-0.329547	0.0314505	1	0.174103	0.256236	1	0.220071	0.150363	1	-0.283581	0.064114	1	-1.62881	NA
ENSG00000085788	DDHD2	57.0762	56.9389	56.6719	72.6031	71.8925	70.7313	24.0848	47.5072	45.8407	63.6993	66.662	63.3525	DDHD2	0.334664	0.127382	1	-0.538902	0.0143436	1	-0.152001	0.488094	1	0.721568	0.00106152	1	-1.33896	NA
ENSG00000085831	TTC39A	0.856269	0.623896	0.581614	1.02414	0.986217	1.16042	0.69919	0.637565	0.518681	1.25768	1.13117	1.36977	TTC39A	0.646685	0.00442551	1	-0.170934	0.526626	1	0.252875	0.201422	1	1.07051	2.66913e-06	0.0259706	-6.26269	NA
ENSG00000085832	EPS15	46.6381	48.5337	47.5469	57.8959	55.625	53.9276	26.0634	54.4745	53.7498	64.5534	64.9846	65.7499	EPS15	0.230681	0.330607	1	-0.0871204	0.712557	1	0.221993	0.348522	1	0.539794	0.0229382	1	-6.19595	NA
ENSG00000085840	ORC1	25.5181	26.0115	26.6162	3.49143	3.37249	3.30497	21.1765	26.4369	27.3693	3.86113	4.35908	4.10164	ORC1	-2.95306	8.38961e-87	1.1232e-82	-0.058153	0.662987	1	0.279093	0.0629743	1	-2.61582	7.72903e-71	1.03067e-66	44.9817	NA
ENSG00000085871	MGST2	83.256	79.633	81.0224	47.3375	48.0435	47.9455	174.316	60.735	58.5859	37.7612	38.5552	39.1002	MGST2	-0.767423	0.0315674	1	0.267463	0.451206	1	-0.312674	0.379152	1	-1.34756	0.000189947	1	-5.0383	NA
ENSG00000085872	CHERP	50.4048	50.1765	48.8873	31.2657	31.5441	31.5933	6.5158	43.8721	42.499	30.5018	29.4071	28.7024	CHERP	-0.663439	0.190824	1	-0.686337	0.175996	1	-0.0914322	0.856657	1	-0.0685271	0.892917	1	0.0998447	NA
ENSG00000085978	ATG16L1	31.796	32.0862	33.5931	31.183	31.135	31.3675	32.7621	33.5894	34.7914	31.2594	31.4792	30.6677	ATG16L1	-0.0573743	0.585047	1	0.0535821	0.612327	1	-0.00430974	0.968638	1	-0.115267	0.272097	1	-2.15122	NA
ENSG00000085982	USP40	54.1528	54.5893	52.5648	63.1613	62.9338	61.0103	43.847	61.425	59.3415	71.799	70.0308	69.7083	USP40	0.214182	0.130209	1	0.0301699	0.834722	1	0.177145	0.209454	1	0.361156	0.0106164	1	11.9708	NA
ENSG00000085998	POMGNT1	50.9295	52.1441	50.3308	80.3496	81.7103	84.2617	51.6661	39.3955	38.1331	65.0906	66.7606	66.614	POMGNT1	0.683538	6.14942e-07	0.0062146	-0.24908	0.0705031	1	-0.311782	0.022149	1	0.620838	6.28232e-06	0.0598077	-2.49253	NA
ENSG00000085999	RAD54L	25.6493	26.2216	23.9697	2.80224	3.05886	2.93814	6.84954	25.932	23.5239	4.43968	5.13434	4.54766	RAD54L	-3.1205	3.17457e-14	3.72187e-10	-0.42914	0.256068	1	0.688031	0.0745062	1	-2.00336	3.55014e-07	0.00361121	4.66831	NA
ENSG00000086015	MAST2	66.4837	69.5468	67.0857	49.4051	48.3571	47.6915	62.3696	76.0161	76.4527	53.9742	55.611	54.5855	MAST2	-0.481976	5.98342e-05	0.546944	0.0815855	0.498009	1	0.17473	0.145004	1	-0.388833	0.00119341	1	-4.76595	NA
ENSG00000086061	DNAJA1	218.877	216.715	214.357	266.196	264.008	261.497	124.588	138.217	143.437	143.594	145.711	144.221	DNAJA1	0.28467	0.00799134	1	-0.677861	3.39905e-10	4.53059e-06	-0.868975	8.70474e-16	1.17148e-11	0.0935582	0.384067	1	-0.13802	NA
ENSG00000086062	B4GALT1	121.542	118.488	119.447	61.0523	58.5021	58.4001	105.565	186.198	184.695	76.1518	75.514	74.4751	B4GALT1	-1.01475	2.77855e-07	0.00284496	0.406796	0.0377269	1	0.345868	0.0775026	1	-1.07568	5.23216e-08	0.000548069	-2.64428	NA
ENSG00000086065	CHMP5	45.3637	43.6625	44.7458	64.8429	63.6974	63.6627	42.083	49.5436	50.3745	75.2565	75.8241	75.2278	CHMP5	0.523133	5.68662e-06	0.0550863	0.0869855	0.454736	1	0.235759	0.0393608	1	0.671905	5.52311e-09	5.95723e-05	7.72433	NA
ENSG00000086102	NFX1	42.9463	42.6309	41.6354	30.7557	31.3805	31.1136	64.4674	52.1353	54.052	38.3811	36.5254	39.3929	NFX1	-0.448406	0.000261776	1	0.423387	0.000543601	1	0.29391	0.0164841	1	-0.577888	2.34589e-06	0.022903	-1.36492	NA
ENSG00000086189	DIMT1	24.7123	24.98	24.3478	17.4268	16.722	16.7789	23.5127	23.4076	23.9437	16.6856	16.4391	17.1338	DIMT1	-0.540575	1.83623e-07	0.00189352	-0.0631788	0.543183	1	-0.0191168	0.85679	1	-0.496511	1.77492e-06	0.017435	7.85882	NA
ENSG00000086200	IPO11	36.4997	36.7855	37.0987	23.6295	23.7444	22.8458	19.1503	35.1713	34.3884	21.9338	22.4438	23.3083	IPO11	-0.65325	0.0014615	1	-0.314316	0.124037	1	-0.0530964	0.796384	1	-0.392026	0.056391	1	1.24723	NA
ENSG00000086232	EIF2AK1	229.184	228.558	230.889	170.523	175.566	172.259	145.972	212.334	211.629	168.65	169.095	171.164	EIF2AK1	-0.409875	0.00655441	1	-0.272723	0.0701605	1	-0.0265158	0.860364	1	-0.163667	0.277606	1	0.60012	NA
ENSG00000086289	EPDR1	109.286	110.159	111.405	84.3469	84.3966	81.9196	47.1844	96.2786	96.2507	65.0217	64.9282	63.4361	EPDR1	-0.400552	0.083867	1	-0.464563	0.0450579	1	-0.37442	0.106177	1	-0.310406	0.180803	1	0.668169	NA
ENSG00000086300	SNX10	40.3976	37.7215	38.7828	47.6545	46.7071	45.8432	36.5286	41.6338	42.2471	54.5941	54.6243	54.1534	SNX10	0.262422	0.0205639	1	0.0434842	0.706257	1	0.220746	0.0499993	1	0.439682	0.000101998	0.874025	10.1113	NA
ENSG00000086475	SEPHS1	66.7461	63.5103	67.6184	56.6553	58.6249	59.2185	94.9808	69.2002	67.3682	54.4839	53.5107	55.143	SEPHS1	-0.181486	0.217259	1	0.22615	0.123735	1	-0.0971742	0.508806	1	-0.504811	0.000605862	1	-2.2322	NA
ENSG00000086504	MRPL28	64.6847	62.2877	63.2879	59.4672	61.3657	61.9556	176.27	51.9165	51.6339	47.5965	47.52	45.6372	MRPL28	-0.0578279	0.885934	1	0.556463	0.167889	1	-0.377214	0.349276	1	-0.991505	0.0146367	1	-1.7818	NA
ENSG00000086506	HBQ1	4.56679	4.00509	4.60279	1.12063	1.0953	1.20275	9.47179	3.33026	2.85279	0.568931	0.510962	0.491667	HBQ1	-1.9748	2.15157e-06	0.0212274	0.245497	0.534255	1	-1.16756	0.00646841	1	-3.38744	3.1923e-14	3.75638e-10	-13.7983	NA
ENSG00000086544	ITPKC	13.7869	14.1487	14.6042	16.3517	16.3265	17.2163	33.3819	22.4147	21.0723	18.7243	17.7923	18.4161	ITPKC	0.230425	0.185897	1	0.852987	1.01543e-06	0.013287	0.139049	0.422135	1	-0.483529	0.00512293	1	-0.566866	CBP/p300 activity.dependent
ENSG00000086589	RBM22	39.2358	37.0911	37.494	56.7243	57.2613	55.8605	25.7774	38.9411	37.8308	60.5724	61.5029	59.2408	RBM22	0.577846	0.000272983	1	-0.149234	0.346318	1	0.0943241	0.550267	1	0.821405	2.45999e-07	0.00251288	-5.50413	NA
ENSG00000086598	TMED2	249.086	253.621	249.345	163.714	163.362	165.529	114.075	213.798	220.361	164.187	165.952	166.355	TMED2	-0.610494	0.00454713	1	-0.455892	0.0337918	1	0.0113505	0.957925	1	-0.143251	0.504587	1	0.314221	NA
ENSG00000086619	ERO1B	3.85467	4.53997	4.12163	17.6336	16.7901	17.2728	2.43941	3.48172	3.4741	15.6525	17.1157	17.0919	ERO1B	2.0544	1.29536e-39	1.68643e-35	-0.405484	0.0126423	1	-0.0522918	0.719314	1	2.40762	1.97341e-51	2.60549e-47	-5.93765	NA
ENSG00000086666	ZFAND6	46.1133	45.5346	45.9144	63.5472	64.0246	63.2959	45.2297	48.9714	48.964	66.3028	66.3237	65.5269	ZFAND6	0.472747	6.81967e-06	0.0657553	0.0580833	0.584521	1	0.0540661	0.604679	1	0.468729	8.02371e-06	0.0757759	8.06994	NA
ENSG00000086696	HSD17B2	18.3407	17.9119	18.5738	1.24468	1.35438	1.32973	51.2131	21.5564	21.8447	0.858204	0.863354	0.714677	HSD17B2	-3.83352	1.20709e-27	1.53179e-23	0.787167	0.0112124	1	-0.71029	0.0384299	1	-5.33077	6.14785e-45	8.07213e-41	-6.7721	NA
ENSG00000086712	TXLNG	23.2318	24.6934	23.7292	21.9616	21.1536	20.7153	14.025	32.445	31.1475	23.8072	24.3045	24.4513	TXLNG	-0.167015	0.51992	1	0.116712	0.655216	1	0.185225	0.474918	1	-0.0985054	0.706315	1	-0.844004	NA
ENSG00000086730	LAT2	0.556429	0.471074	0.684721	0.459006	0.563507	0.469085	2.53476	0.940492	1.1232	0.830654	0.933833	0.937686	LAT2	-0.213569	0.612484	1	1.45388	0.000118372	1	0.897637	0.0181552	1	-0.770698	0.0314271	1	-0.530097	NA
ENSG00000086758	HUWE1	300.677	315.495	300.486	355.652	347.936	331.788	139.893	338.25	348.485	342.09	334.818	341.543	HUWE1	0.175717	0.529475	1	-0.149051	0.593652	1	-0.0237804	0.932203	1	0.300988	0.281609	1	-2.01936	NA
ENSG00000086827	ZW10	30.859	30.4051	30.139	21.8789	21.4672	20.9128	17.3624	28.1703	28.8638	20.5425	22.5566	21.3849	ZW10	-0.508922	0.00508869	1	-0.295602	0.102668	1	0.00502805	0.979191	1	-0.208288	0.253945	1	0.704622	NA
ENSG00000086848	ALG9	9.5891	9.98426	9.50038	7.73682	7.43596	7.326	6.9449	10.5837	10.6779	8.64103	9.43352	8.49214	ALG9	-0.371049	0.029826	1	-0.0393026	0.811447	1	0.2406	0.157614	1	-0.0911519	0.604338	1	2.31924	NA
ENSG00000087008	ACOX3	19.2027	19.4784	20.0173	17.3027	17.3219	17.4703	18.7927	16.9788	15.8499	14.9499	14.0428	14.8758	ACOX3	-0.172561	0.130303	1	-0.187627	0.104758	1	-0.248383	0.0293556	1	-0.23331	0.0417681	1	1.24348	NA
ENSG00000087053	MTMR2	44.5392	45.0761	45.5191	52.5616	53.3069	50.5274	30.1637	45.0838	45.2697	59.3051	58.6979	58.7251	MTMR2	0.210934	0.185092	1	-0.16414	0.302151	1	0.176419	0.266463	1	0.551493	0.000537341	1	-3.3599	NA
ENSG00000087074	PPP1R15A	28.985	27.6161	29.2969	34.9459	34.8031	34.6408	63.7046	40.8091	41.4243	79.8435	82.3082	81.3606	PPP1R15A	0.281511	0.104703	1	0.764228	1.1332e-05	0.146545	1.22272	2.54301e-12	3.41348e-08	0.739992	1.96239e-05	0.180088	0.968286	NA
ENSG00000087085	ACHE	2.01815	1.82737	1.8189	0.927653	1.2453	1.03344	2.20102	0.890005	1.03924	1.56072	1.13117	1.18857	ACHE	-0.838397	0.00983731	1	-0.483974	0.15046	1	0.282556	0.386106	1	-0.0718159	0.808853	1	0.148388	NA
ENSG00000087086	FTL	3714.77	3687.46	3768.41	2204.47	2263.22	2304.39	13225.9	3326.33	3196.75	2462.31	2435.83	2399.48	FTL	-0.722047	0.115449	1	0.822067	0.0735247	1	0.107828	0.813234	1	-1.43629	0.00202718	1	-1.74716	NA
ENSG00000087087	SRRT	123.51	121.22	123.313	83.8369	83.8102	85.2352	100.75	79.4324	79.3578	52.0458	50.7057	52.1045	SRRT	-0.541573	1.52892e-05	0.144605	-0.504635	5.74092e-05	0.73237	-0.707859	1.82718e-08	0.000244056	-0.744793	3.37057e-09	3.65336e-05	1.47591	NA
ENSG00000087088	BAX	97.311	97.3413	95.6292	61.4245	65.5519	64.6786	209.287	94.3768	94.1013	62.7075	64.1106	62.4884	BAX	-0.599168	0.0285526	1	0.454307	0.0961985	1	-0.0177959	0.948275	1	-1.07127	0.000101536	0.870466	-2.35804	NA
ENSG00000087095	NLK	12.6625	12.4103	12.2499	28.7432	28.3124	28.2071	7.27864	12.7042	12.5754	26.7688	27.4337	27.3225	NLK	1.19384	5.04834e-10	5.55065e-06	-0.193682	0.310228	1	-0.0647473	0.731666	1	1.32278	6.38681e-12	7.29182e-08	-6.82965	NA
ENSG00000087111	PIGS	82.1316	85.4976	82.9127	99.2195	100.473	102.942	59.3898	85.6088	86.5784	101.663	102.902	102.909	PIGS	0.272619	0.0703923	1	-0.112979	0.452813	1	0.0228947	0.879297	1	0.408493	0.0067171	1	-3.61565	NA
ENSG00000087116	ADAMTS2	12.6812	12.8688	11.6828	2.81603	2.66342	2.47255	9.16189	10.5837	10.5772	1.75357	1.34261	1.32795	ADAMTS2	-2.23948	1.16518e-48	1.53268e-44	-0.294553	0.0370576	1	-0.858688	3.07027e-07	0.00408591	-2.80348	1.47559e-66	1.96386e-62	9.51775	NA
ENSG00000087152	ATXN7L3	94.3688	93.8837	93.6186	111.749	112.009	110.631	70.5939	95.8915	97.8627	108.881	109.259	107.09	ATXN7L3	0.246567	0.0748811	1	-0.0920741	0.505434	1	-0.0400785	0.772058	1	0.298563	0.0309548	1	-3.24264	NA
ENSG00000087157	PGS1	21.9575	21.7898	19.9486	29.97	30.3032	31.4945	23.3697	23.3067	23.4735	27.7606	27.3773	26.7929	PGS1	0.527666	8.14338e-07	0.00819712	0.139716	0.197324	1	-0.163725	0.121595	1	0.224224	0.0360676	1	1.60486	NA
ENSG00000087191	PSMC5	76.4909	74.4562	77.0012	79.7155	83.0466	83.9936	143.111	67.147	65.3363	69.8705	73.9212	72.2032	PSMC5	0.114417	0.665619	1	0.273523	0.301379	1	-0.192162	0.467753	1	-0.351269	0.184564	1	-1.28424	NA
ENSG00000087206	UIMC1	23.7191	23.7001	23.6261	25.187	25.7216	23.523	34.3354	30.8462	32.5581	32.2925	32.8605	32.1033	UIMC1	0.0673222	0.539339	1	0.460054	2.56936e-05	0.330189	0.38623	0.000354792	1	-0.00651074	0.951251	1	-0.0141521	NA
ENSG00000087237	CETP	0.687609	0.547485	0.856567	4.52521	4.28609	4.26437	1.10445	0.671223	0.619434	1.97397	2.08968	2.01092	CETP	2.69044	4.0436e-34	5.21989e-30	0.160299	0.524812	1	-1.11769	6.68181e-09	8.93024e-05	1.41245	8.58557e-10	9.43211e-06	8.81134	NA
ENSG00000087253	LPCAT2	20.6832	20.338	20.4813	28.8673	30.3714	29.0819	8.63744	18.544	20.3166	27.733	28.1385	29.5108	LPCAT2	0.522745	0.0415701	1	-0.371347	0.147714	1	-0.0488671	0.848854	1	0.845232	0.00102735	1	-2.27612	NA
ENSG00000087263	OGFOD1	41.672	42.7073	42.4603	27.0203	28.1351	26.7257	77.7693	55.1982	52.3392	29.8682	30.1965	31.0022	OGFOD1	-0.631951	6.62146e-05	0.603016	0.546427	0.000532683	1	0.153541	0.33156	1	-1.02484	1.11234e-10	1.24393e-06	-1.87553	NA
ENSG00000087266	SH3BP2	19.3526	18.3895	18.5223	19.2325	19.4355	19.5161	75.1948	62.1487	62.8847	35.8189	35.4823	34.5843	SH3BP2	0.0485019	0.693705	1	1.83238	8.18191e-50	1.10423e-45	0.864822	8.89241e-13	1.19372e-08	-0.91908	1.81262e-14	2.13925e-10	-0.501578	CBP/p300 activity.dependent
ENSG00000087269	NOP14	50.3486	49.9664	49.0935	23.5192	22.6126	21.8017	39.5084	53.3301	52.0538	23.4904	23.1345	23.4617	NOP14	-1.13806	2.31515e-16	2.77379e-12	-0.0433496	0.749485	1	0.0450574	0.745345	1	-1.04966	3.60443e-14	4.23844e-10	24.2138	NA
ENSG00000087274	ADD1	159.303	159.521	155.019	185.52	186.079	185.394	107.186	127.211	128.76	175.744	173.239	170.244	ADD1	0.233301	0.0403836	1	-0.383545	0.000775139	1	-0.101308	0.372829	1	0.51554	6.25822e-06	0.0595845	-1.34414	NA
ENSG00000087299	L2HGDH	12.1377	10.9967	11.5797	6.4825	5.8133	5.85868	8.56592	12.1488	13.1296	6.12022	6.262	5.96934	L2HGDH	-0.938616	2.59019e-08	0.00027355	-0.0331684	0.837155	1	0.0156226	0.931518	1	-0.889822	1.39209e-07	0.00143594	26.8274	NA
ENSG00000087301	TXNDC16	15.7358	17.7018	15.0166	19.2876	19.2446	17.6819	5.03781	13.7981	12.1053	18.9722	17.7641	18.876	TXNDC16	0.214756	0.465024	1	-0.645839	0.0285617	1	-0.0155581	0.958591	1	0.845053	0.00421747	1	-1.30846	NA
ENSG00000087302	RTRAF	62.0236	62.6316	62.3772	59.3294	59.5521	60.8833	101.203	66.3729	63.422	60.5862	61.2915	61.1085	RTRAF	-0.057207	0.741411	1	0.304078	0.0789828	1	0.0256388	0.882603	1	-0.335648	0.0523764	1	-1.10382	NA
ENSG00000087338	GMCL1	57.2824	59.365	59.1293	83.6026	83.1421	82.7944	38.1258	50.7384	52.0705	79.5818	78.1499	79.688	GMCL1	0.505733	0.00020264	1	-0.317895	0.0197068	1	-0.0718515	0.59615	1	0.751779	3.72019e-08	0.000391178	-2.36486	NA
ENSG00000087365	SF3B2	234.357	233.353	233.432	207.794	210.419	210.452	235.128	243.703	246.759	220.995	223.194	222.163	SF3B2	-0.157437	0.12073	1	0.0495071	0.626034	1	0.0840072	0.407424	1	-0.122937	0.225668	1	-2.48321	NA
ENSG00000087448	KLHL42	12.6062	12.6587	12.0437	21.4654	21.399	21.0963	11.6173	14.2693	13.2303	17.0988	18.6662	17.4962	KLHL42	0.77933	9.34435e-11	1.04274e-06	0.0712239	0.571727	1	-0.264558	0.0251579	1	0.443548	0.000221834	1	6.22752	NA
ENSG00000087460	GNAS	1393.03	1359.94	1398.34	1365.1	1384.7	1407.56	1532.23	1195.59	1177.38	1355.22	1358.84	1366.43	GNAS	0.00210167	0.987495	1	-0.0882086	0.509729	1	-0.0269273	0.840451	1	0.063383	0.635702	1	-0.718558	NA
ENSG00000087470	DNM1L	57.7134	60.7213	58.6825	67.6548	66.7245	64.7632	41.7015	59.1026	61.2558	65.614	63.6878	64.1749	DNM1L	0.169191	0.263926	1	-0.127374	0.399782	1	-0.0416624	0.783242	1	0.254903	0.091991	1	-2.00123	NA
ENSG00000087494	PTHLH	0.987449	0.814924	0.873751	0.900085	1.17712	1.34384	1.43819	0.890005	1.13999	1.17503	1.01841	1.09101	PTHLH	0.364456	0.136252	1	0.367436	0.134972	1	-0.0594631	0.826635	1	-0.0625529	0.77995	1	-0.170242	NA
ENSG00000087502	ERGIC2	29.9595	30.8445	31.4106	38.64	37.0393	36.616	21.7248	24.754	24.565	32.4441	32.5786	32.7723	ERGIC2	0.284431	0.00998511	1	-0.375471	0.00076704	1	-0.199646	0.0692029	1	0.460261	3.44055e-05	0.308961	-1.22582	NA
ENSG00000087586	AURKA	188.125	184.125	183.614	51.3624	51.7388	53.0247	131.859	130.56	130.607	55.8752	57.7958	57.5543	AURKA	-1.83262	1.73305e-69	2.30981e-65	-0.50022	7.34392e-07	0.0096198	0.133262	0.190473	1	-1.19914	1.29532e-31	1.66656e-27	2.39722	NA
ENSG00000087842	PIR	15.9982	14.8555	15.8243	4.77332	4.69516	4.88516	25.6105	14.791	15.0439	4.71518	4.85243	4.86823	PIR	-1.70763	1.1992e-15	1.42705e-11	0.24638	0.229434	1	0.00830577	0.973954	1	-1.94571	1.17046e-19	1.44131e-15	-7.89719	NA
ENSG00000087884	AAMDC	3.57357	3.33649	3.4858	4.42872	4.31336	4.03863	5.37155	2.08489	1.92922	2.80047	3.40058	3.53017	AAMDC	0.300276	0.379055	1	-0.158195	0.659415	1	-0.396564	0.245396	1	0.0619486	0.873175	1	-0.391597	NA
ENSG00000087903	RFX2	4.52931	4.32984	4.74027	3.43629	3.4543	3.64358	4.25114	4.07074	4.17937	4.08153	3.95031	3.6138	RFX2	-0.372208	0.00382891	1	-0.124364	0.354548	1	0.146132	0.256943	1	-0.101711	0.42855	1	0.817848	NA
ENSG00000087995	METTL2A	22.2386	21.083	21.4264	14.5184	13.6948	14.3945	35.575	23.9125	23.1377	14.6607	14.4798	14.6388	METTL2A	-0.604767	0.00034943	1	0.350406	0.0369574	1	0.0392323	0.818359	1	-0.915945	6.25462e-08	0.00065292	-2.61396	NA
ENSG00000088035	ALG6	10.1326	9.08643	9.82689	8.23304	8.3632	8.20075	5.80065	8.54734	8.44457	7.62168	7.82662	7.47466	ALG6	-0.229042	0.149937	1	-0.345586	0.030095	1	-0.11383	0.475425	1	0.00273157	0.977604	1	-0.00790415	NA
ENSG00000088038	CNOT3	40.4913	39.7655	42.3056	52.6994	52.9387	54.6754	40.5811	48.3487	50.257	61.9775	58.571	59.1572	CNOT3	0.387547	0.00143422	1	0.18441	0.131395	1	0.164842	0.172725	1	0.367976	0.00240286	1	1.99543	NA
ENSG00000088179	PTPN4	22.2948	21.9999	21.2546	28.5916	26.4716	25.7099	12.0702	25.3935	26.3114	28.7524	27.8284	28.2703	PTPN4	0.301692	0.219404	1	-0.0380377	0.875545	1	0.0711329	0.772027	1	0.410862	0.0938049	1	-10.8015	NA
ENSG00000088205	DDX18	143.411	143.073	138.144	120.736	118.745	117.178	156.866	147.187	147.752	125.094	126.399	125.043	DDX18	-0.251693	0.0137079	1	0.089412	0.381138	1	0.0782591	0.443144	1	-0.262846	0.0100224	1	-2.93972	NA
ENSG00000088247	KHSRP	356.523	374.141	366.234	271.006	278.189	277.751	269.765	342.811	342.272	264.427	260.083	257.636	KHSRP	-0.407601	0.00122937	1	-0.199959	0.112367	1	-0.0803641	0.523464	1	-0.288005	0.0223548	1	1.44032	NA
ENSG00000088256	GNA11	55.652	56.6524	55.5033	52.1205	51.7388	55.1128	121.799	66.8777	66.5957	51.9493	52.6368	49.7211	GNA11	-0.0780792	0.719573	1	0.604987	0.00546857	1	-0.0429887	0.843424	1	-0.726057	0.000867908	1	-1.20012	NA
ENSG00000088280	ASAP3	28.985	29.8512	27.7675	28.4538	28.9124	27.2054	48.3525	43.973	41.1221	25.4189	26.6021	26.2632	ASAP3	-0.0341389	0.767753	1	0.623712	6.04975e-08	0.00079893	-0.111618	0.331675	1	-0.769473	2.22056e-11	2.51301e-07	-1.2337	CBP/p300 activity.dependent
ENSG00000088298	EDEM2	62.6233	60.301	62.8068	37.3305	36.5348	36.1081	123.968	52.9599	53.4811	33.7527	34.6789	33.9152	EDEM2	-0.756541	0.00895835	1	0.310658	0.280535	1	-0.103779	0.71907	1	-1.17098	5.91157e-05	0.519036	-3.76935	NA
ENSG00000088305	DNMT3B	16.4292	17.1096	16.5976	8.75682	8.63592	8.82154	4.17962	10.9371	11.9709	7.60791	7.58699	7.93461	DNMT3B	-0.93785	0.00223983	1	-0.887386	0.00378398	1	-0.181276	0.554321	1	-0.231709	0.453475	1	0.261114	NA
ENSG00000088325	TPX2	308.023	307.739	308.872	101.26	104.428	98.427	219.847	223.239	222.41	120.039	119.662	120.945	TPX2	-1.60455	4.08678e-54	5.39864e-50	-0.474489	2.81575e-06	0.0366836	0.246025	0.0153842	1	-0.884032	4.46931e-18	5.44853e-14	1.86312	NA
ENSG00000088340	FER1L4	2.05563	2.43866	2.0423	7.53007	8.43138	7.81981	1.46202	1.49586	1.49263	4.10908	4.21812	4.14345	FER1L4	1.87948	2.87289e-40	3.74481e-36	-0.560642	0.000807365	1	-0.936376	4.69184e-13	6.30161e-09	1.50388	1.73823e-22	2.16983e-18	-2.68243	NA
ENSG00000088356	PDRG1	17.2912	18.4277	17.3193	19.0119	20.1036	18.6554	44.6575	19.0825	20.5181	23.4215	24.3467	23.7404	PDRG1	0.123541	0.660754	1	0.66743	0.0177397	1	0.308195	0.271673	1	-0.235707	0.399359	1	-0.353157	NA
ENSG00000088367	EPB41L1	79.1894	80.741	80.1459	121.949	121.963	119.76	60.6771	92.6098	91.297	112.339	111.613	109.613	EPB41L1	0.599327	0.000184525	1	0.0274201	0.865893	1	-0.124704	0.434571	1	0.447204	0.00517732	1	16.3093	NA
ENSG00000088387	DOCK9	1.54965	1.63634	1.8189	5.93115	6.14056	5.80224	0.341611	1.07513	1.02245	4.49478	4.51413	4.71491	DOCK9	1.85441	1.25097e-11	1.41635e-07	-1.03031	0.000385067	1	-0.383408	0.138004	1	2.50159	3.4847e-18	4.25064e-14	-2.42801	NA
ENSG00000088448	ANKRD10	64.9096	67.541	66.3296	48.3989	49.5434	49.8078	40.7003	67.2985	65.7393	49.2632	48.7182	49.8465	ANKRD10	-0.428238	0.0167337	1	-0.193597	0.278198	1	0.000761856	0.997207	1	-0.233878	0.191881	1	1.20807	NA
ENSG00000088451	TGDS	12.1003	12.5058	12.4561	13.3744	12.9039	12.9131	5.53842	11.9805	12.4915	16.3963	17.7359	17.4404	TGDS	0.0807722	0.749482	1	-0.302021	0.22947	1	0.396853	0.113297	1	0.779648	0.00196386	1	-2.58144	NA
ENSG00000088543	C3orf18	1.73705	1.88468	1.54395	3.78089	3.72702	3.92576	1.9388	2.01757	2.16431	3.21371	3.30191	3.62774	C3orf18	1.16289	3.64825e-15	4.31806e-11	0.255964	0.125353	1	-0.174123	0.196289	1	0.732764	4.92581e-07	0.0049795	2.86276	NA
ENSG00000088682	COQ9	35.1879	34.0156	36.1536	29.1981	28.0806	28.7151	36.2187	31.7045	30.8789	25.5979	26.4329	24.6464	COQ9	-0.293348	0.010651	1	-0.0939052	0.418372	1	-0.165621	0.149621	1	-0.365061	0.00151612	1	3.88754	NA
ENSG00000088727	KIF9	3.12381	2.80161	4.05289	4.029	4.50426	4.25026	6.27742	3.49855	3.30618	4.12286	4.00669	3.795	KIF9	0.359049	0.156472	1	0.385038	0.127365	1	-0.101098	0.689898	1	-0.127114	0.609027	1	-0.330135	NA
ENSG00000088766	CRLS1	97.9669	98.7358	97.3477	65.5183	65.5791	67.4016	101.179	86.2483	84.1939	62.0601	62.095	62.6417	CRLS1	-0.567141	7.52387e-07	0.0075818	-0.114962	0.315974	1	-0.0876977	0.443896	1	-0.539876	2.50962e-06	0.0244487	4.69611	NA
ENSG00000088808	PPP1R13B	18.6405	18.5423	17.5427	44.9116	43.2573	43.3036	14.5256	17.9549	19.477	49.8555	49.1551	46.5292	PPP1R13B	1.26598	2.84148e-21	3.51719e-17	-0.0724764	0.58521	1	0.146749	0.260693	1	1.48521	1.85276e-28	2.36616e-24	-20.4923	NA
ENSG00000088812	ATRN	160.352	163.246	162.168	213.721	211.646	208.533	62.012	166.608	169.884	200.167	200.712	202.232	ATRN	0.384056	0.204141	1	-0.285515	0.34482	1	-0.0718422	0.812011	1	0.59773	0.0485453	1	-2.09351	NA
ENSG00000088826	SMOX	28.5352	28.1892	27.6644	29.97	31.9395	30.8314	87.2332	51.3611	51.7347	47.3072	45.5748	46.0135	SMOX	0.13631	0.491547	1	1.17351	4.33095e-09	5.75063e-05	0.583186	0.00319094	1	-0.454026	0.0212967	1	-0.386896	CBP/p300 activity.dependent
ENSG00000088832	FKBP1A	267.564	262.695	265.893	234.066	234.609	231.826	337.514	213.175	215.492	191.103	197.413	200.03	FKBP1A	-0.184679	0.291245	1	-0.0555591	0.751362	1	-0.251267	0.151135	1	-0.380387	0.0298857	1	6.84653	NA
ENSG00000088833	NSFL1C	83.9306	83.339	84.0125	71.142	73.1197	73.934	111.954	77.699	78.1319	69.4021	69.1287	70.1125	NSFL1C	-0.203766	0.181077	1	0.0912185	0.548453	1	-0.0646095	0.67162	1	-0.359594	0.0182709	1	-3.94212	NA
ENSG00000088836	SLC4A11	7.79007	8.36053	7.02581	10.2317	10.0131	10.0913	7.39783	5.77051	5.70745	7.60791	7.16412	6.94501	SLC4A11	0.390408	0.00621407	1	-0.30261	0.0412688	1	-0.483866	0.000621457	1	0.20918	0.158134	1	-0.691253	NA
ENSG00000088854	C20orf194	32.6018	34.3976	33.3353	71.7623	70.7198	65.5674	13.9773	32.6133	34.506	73.7688	72.6385	73.374	C20orf194	1.05278	0.000136075	1	-0.306285	0.262934	1	0.0791723	0.771755	1	1.43824	2.36924e-07	0.00242279	-4.69574	NA
ENSG00000088876	ZNF343	17.2163	16.7849	17.3365	15.6487	15.0311	15.4527	14.764	18.0896	18.2512	16.0519	16.721	16.7296	ZNF343	-0.154603	0.206227	1	-0.00423229	0.968179	1	0.101905	0.402646	1	-0.0484672	0.700861	1	11.4518	NA
ENSG00000088881	EBF4	2.35547	2.55328	2.35162	1.50657	1.34075	1.40027	3.24992	1.66415	1.66055	1.34033	1.34261	1.28614	EBF4	-0.785934	0.00238998	1	-0.160723	0.556232	1	-0.100004	0.716145	1	-0.725161	0.00533578	1	4.51188	NA
ENSG00000088888	MAVS	208.046	209.608	208.858	214.851	209.178	207.672	300.684	218.476	223.048	187.797	188.336	185.06	MAVS	0.0119031	0.932411	1	0.244305	0.0808942	1	-0.170771	0.222262	1	-0.403173	0.00400031	1	-1.65029	NA
ENSG00000088899	LZTS3	35.2067	35.1617	36.3942	49.9151	49.8707	51.8395	31.9039	36.4167	35.8325	45.3787	44.5458	43.3095	LZTS3	0.506391	6.0218e-06	0.0582368	-0.0349312	0.75519	1	-0.18665	0.0930746	1	0.354673	0.00152611	1	-10.1535	NA
ENSG00000088926	F11	49.4491	50.3103	48.7326	2.84359	2.1589	2.72651	16.0989	47.0192	48.561	2.66272	2.47026	2.42906	F11	-4.27993	3.21445e-28	4.08717e-24	-0.410674	0.224305	1	-0.0317578	0.933176	1	-3.901	1.85309e-24	2.331e-20	9.49902	NA
ENSG00000088930	XRN2	166.518	164.946	165.244	142.018	135.081	136.747	120.345	171.741	174.301	141.004	139.959	142.786	XRN2	-0.263355	0.0766455	1	-0.090578	0.541913	1	0.0341257	0.818608	1	-0.138651	0.351728	1	1.53074	NA
ENSG00000088970	KIZ	41.0535	40.2813	40.0888	23.5881	22.6263	22.7047	41.9638	33.2864	36.2523	24.799	25.7704	25.0227	KIZ	-0.817865	1.96365e-11	2.21617e-07	-0.124155	0.30818	1	0.133485	0.27324	1	-0.560225	4.06231e-06	0.0390632	4.51231	NA
ENSG00000088986	DYNLL1	169.91	162.979	164.23	157.387	160.089	167.024	192.242	113.259	114.756	97.2963	96.4743	95.8841	DYNLL1	-0.037098	0.847901	1	-0.242696	0.209951	1	-0.742342	0.000133063	1	-0.536742	0.0056287	1	2.21158	NA
ENSG00000088992	TESC	66.465	64.7138	66.0203	9.1979	9.03135	10.2042	139.535	42.3911	39.4429	6.36817	6.34657	6.35961	TESC	-2.79789	1.17861e-10	1.3125e-06	0.166524	0.681676	1	-0.57819	0.158899	1	-3.54258	2.87086e-15	3.42063e-11	-21.2737	NA
ENSG00000089006	SNX5	421.026	417.657	417.547	158.724	157.989	159.631	400.901	439.209	433.655	175.455	177.891	179.178	SNX5	-1.39919	6.60697e-39	8.59303e-35	0.0200578	0.84914	1	0.160871	0.127277	1	-1.25838	5.23562e-32	6.74348e-28	-62.7376	NA
ENSG00000089009	RPL6	591.372	584.271	587.519	401.842	401.798	405.38	1224.45	555.752	555.734	364.777	367.323	376.235	RPL6	-0.544362	0.0451549	1	0.405808	0.134808	1	-0.125452	0.643456	1	-1.07562	8.6506e-05	0.746893	-2.65057	NA
ENSG00000089022	MAPKAPK5	30.9527	30.7108	29.3313	24.1808	23.9489	24.4542	36.2664	34.4813	33.1122	27.3336	24.9951	26.5559	MAPKAPK5	-0.3264	0.00268876	1	0.190513	0.0794004	1	0.120279	0.268178	1	-0.396637	0.000253782	1	-2.08194	NA
ENSG00000089048	ESF1	73.6049	74.055	74.9047	56.6415	58.0931	54.0546	150.429	67.5341	68.9802	54.0982	55.907	56.5507	ESF1	-0.399185	0.141406	1	0.366285	0.176842	1	-0.0192302	0.943778	1	-0.784701	0.00398266	1	-2.14232	NA
ENSG00000089050	RBBP9	68.3015	67.1398	68.0824	52.8924	52.1615	53.3774	35.8611	53.7172	54.6229	44.7726	48.7746	48.4527	RBBP9	-0.361526	0.0258459	1	-0.496437	0.00224837	1	-0.158067	0.329811	1	-0.0231528	0.889709	1	0.046638	NA
ENSG00000089053	ANAPC5	99.7659	103.034	99.6847	64.9256	63.0974	64.4528	127.425	91.6673	90.3902	60.724	59.304	60.5928	ANAPC5	-0.652422	9.22848e-06	0.0882888	0.032515	0.823509	1	-0.0917541	0.532021	1	-0.77669	1.36308e-07	0.0014067	-23.8872	NA
ENSG00000089057	SLC23A2	100.965	105.078	105.132	155.926	153.68	148.33	38.8648	135.508	135.326	155.151	150.926	154.842	SLC23A2	0.55755	0.124607	1	-0.00664938	0.98527	1	0.00936857	0.979439	1	0.573568	0.114118	1	-86.2588	NA
ENSG00000089060	SLC8B1	10.1326	10.0798	9.67223	16.6136	16.3538	16.3134	11.5457	10.3986	9.85511	14.5229	14.7617	15.7539	SLC8B1	0.723563	4.94153e-10	5.43519e-06	0.0873311	0.461187	1	-0.130127	0.252566	1	0.506103	1.469e-05	0.136296	5.79522	NA
ENSG00000089063	TMEM230	168.504	169.512	172.049	150.467	153.857	155.243	137.032	153.296	153.042	147.589	147.289	145.323	TMEM230	-0.150436	0.154737	1	-0.202008	0.0562218	1	-0.0621306	0.556655	1	-0.0105589	0.921608	1	0.0522699	NA
ENSG00000089091	DZANK1	1.83075	2.0375	2.07667	4.67683	4.5588	5.0968	1.12828	2.05123	2.24827	4.7014	5.03567	4.53372	DZANK1	1.28182	3.51965e-09	3.7977e-05	-0.115616	0.584476	1	-0.00619868	0.981255	1	1.39124	1.49931e-10	1.67128e-06	-12.0333	NA
ENSG00000089094	KDM2B	34.9818	35.2764	32.6823	31.9686	32.6622	31.2547	13.7866	27.3457	26.8823	28.4907	27.4337	27.2946	KDM2B	-0.102479	0.646912	1	-0.596885	0.00779829	1	-0.204608	0.360064	1	0.289806	0.194798	1	-0.485531	NA
ENSG00000089123	TASP1	16.5416	16.7467	16.8554	16.6963	16.6947	14.9871	8.3037	14.7237	14.876	14.5642	15.1282	14.9734	TASP1	-0.0517908	0.798051	1	-0.401483	0.0462931	1	-0.115443	0.566247	1	0.23426	0.242965	1	-0.583487	NA
ENSG00000089127	OAS1	14.0492	14.4352	14.3292	5.8898	5.74512	6.40892	27.2077	11.0717	10.4428	3.25504	2.85084	3.11203	OAS1	-1.25074	0.000119511	1	0.184939	0.562184	1	-0.975855	0.00288434	1	-2.41147	1.08922e-12	1.25924e-08	-13.0393	NA
ENSG00000089154	GCN1	258.606	255.455	255.875	184.031	185.465	182.488	158.725	242.189	238.379	166.185	167.333	168.822	GCN1	-0.480178	0.00269953	1	-0.268074	0.0933879	1	-0.135986	0.394744	1	-0.348089	0.0295852	1	1.29848	NA
ENSG00000089157	RPLP0	1652.3	1617.18	1653.58	803.969	815.045	838.748	5274.89	1649.51	1594.23	845.136	838.936	841.391	RPLP0	-1.00224	0.010806	1	0.791068	0.043461	1	0.0392045	0.919818	1	-1.7541	1.20112e-05	0.1121	-2.21738	NA
ENSG00000089159	PXN	40.9973	41.4657	39.8311	60.1151	62.1702	62.4917	18.7212	38.4025	38.3682	69.0027	67.3949	68.3842	PXN	0.595799	0.0107565	1	-0.356069	0.126962	1	0.148373	0.523552	1	1.10024	2.95665e-06	0.0286795	-3.08997	NA
ENSG00000089163	SIRT4	1.45595	1.86558	1.35492	1.43765	1.84527	1.66834	2.84466	1.51269	1.62696	1.49185	1.15936	1.20251	SIRT4	0.0856533	0.773359	1	0.34933	0.196926	1	-0.368941	0.17679	1	-0.632615	0.0196346	1	-1.81094	NA
ENSG00000089177	KIF16B	22.6884	21.7898	22.8699	37.5373	36.9848	35.8259	10.4492	21.1525	20.4342	34.5792	35.4964	34.5982	KIF16B	0.713077	0.00158205	1	-0.37061	0.100279	1	-0.0762288	0.734239	1	1.00746	8.89914e-06	0.0837765	-2.71839	NA
ENSG00000089195	TRMT6	25.0121	26.7183	25.9288	30.0941	29.2942	29.9143	35.3843	26.4537	25.9756	28.105	27.3209	29.455	TRMT6	0.201768	0.154057	1	0.175822	0.213911	1	-0.0733268	0.603588	1	-0.0473824	0.734422	1	-0.269491	NA
ENSG00000089199	CHGB	1.38099	1.08236	1.11433	2.77467	2.43161	2.44433	0.723028	0.957322	0.837732	2.42854	2.61122	2.61026	CHGB	1.1173	6.36097e-11	7.11983e-07	-0.505056	0.0134035	1	-0.000329626	1	1	1.62217	1.84173e-19	2.26441e-15	-3.21187	NA
ENSG00000089220	PEBP1	764.361	760.915	767.544	247.009	252.431	255.529	1384.65	586.87	572.022	194.079	196.624	198.078	PEBP1	-1.60275	1.1885e-07	0.00123295	0.14968	0.612418	1	-0.358735	0.225358	1	-2.11116	6.78927e-12	7.74792e-08	-14.1045	NA
ENSG00000089234	BRAP	20.4583	19.8413	18.8659	24.236	25.0535	24.6094	21.3434	24.653	25.7237	24.6888	25.3475	24.8415	BRAP	0.321404	0.00605431	1	0.279688	0.0178884	1	0.0189974	0.871426	1	0.0607091	0.599511	1	0.21706	NA
ENSG00000089248	ERP29	152.913	155.127	150.86	113.224	120.054	117.079	226.975	204.037	211.109	145.729	148.389	144.765	ERP29	-0.389429	0.000226565	1	0.484634	4.43182e-06	0.0576136	0.325081	0.00205815	1	-0.548984	1.99084e-07	0.0020434	-1.13278	NA
ENSG00000089280	FUS	333.622	326.269	326.194	280.186	287.12	292.015	381.282	253.936	267.682	269.744	277.942	268.8	FUS	-0.198533	0.209216	1	-0.127325	0.420984	1	-0.0737769	0.640694	1	-0.144985	0.358894	1	1.1387	NA
ENSG00000089289	IGBP1	44.483	43.7198	46.2065	42.2375	43.2573	44.7851	90.6422	44.5957	43.9096	44.6211	45.5748	46.0275	IGBP1	-0.0450652	0.857362	1	0.414082	0.0978423	1	0.0644053	0.796889	1	-0.394745	0.114275	1	-0.953301	NA
ENSG00000089351	GRAMD1A	94.5375	94.3613	96.1447	102.307	103.173	109.122	199.871	109.994	109.298	128.469	125.666	124.332	GRAMD1A	0.142382	0.508525	1	0.556156	0.00997284	1	0.266713	0.215338	1	-0.147063	0.493965	1	-0.264428	NA
ENSG00000089486	CDIP1	87.1539	85.7841	86.762	51.4864	49.6934	51.5432	108.807	75.6795	75.5795	46.0261	47.9288	46.6825	CDIP1	-0.766282	6.91086e-07	0.00697513	0.00144396	0.991523	1	-0.119009	0.439394	1	-0.886735	9.90831e-09	0.000106049	-614.097	NA
ENSG00000089505	CMTM1	0.856269	0.910438	0.822197	1.16198	1.2453	1.03344	0.19858	1.19293	0.955277	0.982178	1.07479	0.90981	CMTM1	0.423606	0.345883	1	-0.123457	0.781388	1	-0.220217	0.621398	1	0.326931	0.454965	1	-2.64815	NA
ENSG00000089597	GANAB	374.044	378.974	375.204	290.8	291.77	290.082	293.818	362.215	368.552	269.979	271.176	268.452	GANAB	-0.370605	0.00235134	1	-0.138892	0.253655	1	-0.108198	0.374033	1	-0.339911	0.00528276	1	2.44731	NA
ENSG00000089639	GMIP	9.73902	8.57066	8.77863	17.7852	19.0401	18.0205	12.6185	8.88393	8.44457	14.8948	14.1838	14.4716	GMIP	1.0202	4.66106e-10	5.12903e-06	0.140697	0.390617	1	-0.333317	0.0380971	1	0.546188	0.000877459	1	3.882	NA
ENSG00000089682	RBM41	10.0763	9.94606	9.91281	18.3365	17.1174	16.4121	11.8795	12.2161	12.122	17.7187	17.6795	17.8307	RBM41	0.794869	4.3321e-13	5.01051e-09	0.27613	0.0140818	1	0.0374321	0.727019	1	0.556161	3.19754e-07	0.00325702	2.01412	NA
ENSG00000089685	BIRC5	159.209	158.891	153.782	49.0743	50.2797	51.1341	161.61	107.066	107.569	50.131	49.1269	49.8604	BIRC5	-1.64935	8.78808e-23	1.09552e-18	-0.32722	0.0458494	1	-0.0131939	0.936583	1	-1.33533	1.09255e-15	1.30723e-11	4.08082	NA
ENSG00000089693	MLF2	133.329	132.07	132.232	173.128	178.211	183.024	177.939	99.0554	98.3497	147.423	148.163	148.737	MLF2	0.426469	0.0439092	1	-0.0835928	0.693384	1	-0.266257	0.207762	1	0.243806	0.249327	1	-2.91659	NA
ENSG00000089723	OTUB2	4.17325	4.32984	4.56842	3.57413	3.71338	3.61536	2.74931	3.65001	3.64202	3.15861	2.87904	3.04234	OTUB2	-0.264203	0.0754369	1	-0.373893	0.0130093	1	-0.266252	0.0748012	1	-0.156509	0.322086	1	0.418592	NA
ENSG00000089737	DDX24	108.574	113.942	108.346	124.375	126.122	123.329	110.905	100.806	102.262	125.411	125.187	126.158	DDX24	0.176211	0.0919953	1	-0.075828	0.470274	1	0.0112619	0.914426	1	0.263301	0.0119106	1	-3.47235	NA
ENSG00000089775	ZBTB25	10.6948	10.0798	10.4799	8.79817	8.745	8.4406	6.44429	11.1895	11.8366	11.9057	12.0694	11.1264	ZBTB25	-0.267302	0.190701	1	-0.0811598	0.686681	1	0.435203	0.0322104	1	0.249052	0.217708	1	-3.06866	NA
ENSG00000089818	NECAP1	15.6609	15.6196	16.2711	29.2808	28.5033	28.5599	11.9033	17.3322	17.3108	28.1187	29.097	27.2946	NECAP1	0.86174	1.86279e-08	0.000197586	-0.0280266	0.851048	1	-0.0310067	0.838393	1	0.858759	2.01037e-08	0.000213119	-30.6408	NA
ENSG00000089847	ANKRD24	0.219109	0.37556	0.272293	0.707113	0.577143	0.483194	1.15212	0.906834	0.804148	0.899529	0.905641	0.951624	ANKRD24	1.11514	0.000300166	1	1.81945	4.04937e-10	5.39578e-06	0.667689	0.00475563	1	-0.0381912	0.880614	1	-0.0209905	Dox.only
ENSG00000089876	DHX32	20.046	19.2109	20.3438	25.8762	26.3079	25.2443	13.5959	22.2464	23.5071	27.8295	26.9544	28.1867	DHX32	0.377991	0.0426678	1	-0.00403681	0.980111	1	0.0998445	0.591004	1	0.481871	0.00961334	1	-119.369	NA
ENSG00000089902	RCOR1	42.4403	45.0379	45.9659	96.7522	95.6189	92.0498	13.6435	43.7543	43.5066	114.184	110.048	112.944	RCOR1	1.0923	0.00155616	1	-0.402847	0.238909	1	0.24555	0.47184	1	1.7407	7.04618e-07	0.00706238	-4.32099	NA
ENSG00000089916	GPATCH2L	35.9188	35.773	33.9368	44.8564	42.6982	40.6371	18.888	33.623	32.8939	41.9488	43.9397	42.8635	GPATCH2L	0.279553	0.159748	1	-0.30547	0.124682	1	0.00628686	0.975303	1	0.591313	0.00299121	1	-1.93575	NA
ENSG00000090006	LTBP4	2.88019	3.24098	3.4858	5.42115	6.37237	5.47774	7.85076	2.7244	2.6177	4.94935	4.55642	5.30031	LTBP4	0.852032	0.0225194	1	0.454809	0.22172	1	-0.223456	0.545715	1	0.173736	0.648063	1	0.381997	NA
ENSG00000090013	BLVRB	21.489	20.0705	21.5124	13.2228	12.8221	12.8144	92.2393	22.8018	21.257	16.3274	15.2128	15.3915	BLVRB	-0.700022	0.135729	1	1.11228	0.0184055	1	0.272882	0.559751	1	-1.53943	0.00124055	1	-1.38404	NA
ENSG00000090020	SLC9A1	17.9659	17.1287	16.632	29.2257	29.976	30.0554	17.9583	20.7149	19.7961	27.3887	25.8973	25.3991	SLC9A1	0.788261	3.96478e-12	4.52381e-08	0.178638	0.122219	1	-0.18205	0.103217	1	0.42757	0.000156923	1	2.39349	NA
ENSG00000090054	SPTLC1	73.5862	74.3416	74.3204	90.5909	89.3055	90.8506	36.1472	72.8858	72.2211	91.566	93.6552	95.7447	SPTLC1	0.284876	0.210475	1	-0.293685	0.196724	1	0.0534671	0.814111	1	0.632029	0.005589	1	-2.15207	NA
ENSG00000090060	PAPOLA	226.861	230.354	228.809	189.393	190.565	182.77	125.041	231.805	230.772	205.636	205.688	209.326	PAPOLA	-0.285862	0.169167	1	-0.223208	0.282751	1	0.141363	0.49631	1	0.0787099	0.70454	1	-0.35263	NA
ENSG00000090061	CCNK	10.0201	10.4618	10.0331	8.88087	8.67682	9.17426	0.508481	11.3073	11.8198	10.3491	11.0545	10.2344	CCNK	-0.191552	0.791944	1	-0.368671	0.611017	1	0.24385	0.73672	1	0.420976	0.561232	1	-1.14187	NA
ENSG00000090097	PCBP4	38.1114	39.5363	37.683	28.0265	30.3851	29.491	114.6	42.6772	42.7677	32.4441	32.9028	32.3263	PCBP4	-0.392139	0.236856	1	0.794555	0.0169217	1	0.152203	0.645972	1	-1.0345	0.00195304	1	-1.30198	NA
ENSG00000090238	YPEL3	37.3618	37.2822	37.2534	96.4077	98.5915	100.191	116.674	44.9828	45.1354	111.774	111.669	107.634	YPEL3	1.40018	1.5675e-05	0.148144	0.88606	0.00574899	1	0.165573	0.602698	1	0.679688	0.0334663	1	0.767091	NA
ENSG00000090263	MRPS33	20.2896	19.0008	18.0411	19.329	19.9537	20.2638	31.2126	18.8974	18.6374	18.0631	17.7218	17.7192	MRPS33	0.0548446	0.778804	1	0.260443	0.178766	1	-0.154606	0.424973	1	-0.360206	0.0627373	1	-1.38305	NA
ENSG00000090266	NDUFB2	14.1429	13.0789	13.1435	15.9933	16.1083	17.0188	24.4663	8.79978	9.20022	12.7459	12.6191	13.5517	NDUFB2	0.283782	0.39858	1	0.0712046	0.83126	1	-0.336619	0.316098	1	-0.124038	0.710795	1	-1.74199	NA
ENSG00000090273	NUDC	196.408	190.353	191.811	130.578	134.576	136.45	447.53	160.55	162.428	96.1255	94.952	96.4137	NUDC	-0.526819	0.120354	1	0.413249	0.222488	1	-0.482385	0.154839	1	-1.42245	3.69937e-05	0.331131	-3.44212	NA
ENSG00000090316	MAEA	53.2908	52.9273	53.8021	44.2913	45.5345	47.494	42.0115	49.3079	49.3334	41.935	41.4025	41.7066	MAEA	-0.220877	0.0552543	1	-0.185466	0.107708	1	-0.135178	0.240661	1	-0.170588	0.140623	1	0.91978	NA
ENSG00000090339	ICAM1	84.8489	83.6828	85.5247	114.781	116.318	112.381	39.2223	94.7471	95.5454	100.685	100.633	100.79	ICAM1	0.435208	0.113165	1	-0.146219	0.593826	1	-0.185216	0.499465	1	0.396212	0.148973	1	-2.70972	NA
ENSG00000090372	STRN4	76.9406	78.0666	76.2622	86.5385	89.2509	91.6124	109.427	90.3883	90.0712	100.189	99.0961	97.4591	STRN4	0.209518	0.0760618	1	0.325576	0.00588213	1	0.150264	0.202096	1	0.0342048	0.773668	1	0.105059	NA
ENSG00000090382	LYZ	1014.67	1025.07	1023.63	534.565	533.465	528.663	233.745	648.347	652.776	457.579	472.871	474.875	LYZ	-0.940069	0.0026464	1	-0.996993	0.00144882	1	-0.184195	0.552612	1	-0.127271	0.681607	1	0.127655	NA
ENSG00000090432	MUL1	32.7517	32.984	32.6823	41.9619	40.9392	41.3143	42.6074	36.4503	36.7729	39.1111	39.3868	40.6473	MUL1	0.336131	0.0031991	1	0.234268	0.0404244	1	-0.0601661	0.596171	1	0.0416956	0.718428	1	0.177983	NA
ENSG00000090447	TFAP4	31.3088	31.2648	30.4311	6.5652	6.52236	6.83219	23.7511	51.7987	52.6751	8.90275	8.05215	8.17156	TFAP4	-2.2282	7.01633e-17	8.44906e-13	0.464444	0.0688833	1	0.336401	0.194135	1	-2.35626	1.32456e-18	1.62152e-14	-5.07329	NA
ENSG00000090470	PDCD7	32.9017	33.0413	34.4695	35.4146	37.3802	37.1239	54.8128	33.3874	35.1105	40.2131	37.4134	38.7796	PDCD7	0.130579	0.475836	1	0.295423	0.106368	1	0.0828026	0.650672	1	-0.082045	0.651908	1	-0.27772	NA
ENSG00000090487	SPG21	54.4901	52.3925	55.9158	49.7221	49.9525	49.9207	55.2419	55.4338	52.6583	50.5305	49.5357	49.9719	SPG21	-0.122158	0.244179	1	0.00455916	0.965905	1	0.00427157	0.96844	1	-0.122446	0.242952	1	-26.8571	NA
ENSG00000090512	FETUB	1.23107	1.3498	1.06278	0.114412	0.113524	0.158689	3.46447	1.04147	1.39187	0.210783	0.116284	0.0874619	FETUB	-3.58054	5.45135e-10	5.9894e-06	0.700416	0.142773	1	0.13399	0.917337	1	-4.14714	5.0005e-13	5.80858e-09	-5.92096	NA
ENSG00000090520	DNAJB11	45.4949	45.3626	45.0723	40.4456	40.2301	41.1309	22.8452	38.1669	37.3103	39.6897	41.332	38.9887	DNAJB11	-0.158379	0.383048	1	-0.466319	0.0103662	1	-0.0214497	0.906511	1	0.286495	0.114395	1	-0.614375	NA
ENSG00000090534	THPO	15.3798	15.2566	15.5321	7.59899	7.55869	7.8057	31.1887	15.5483	15.1782	7.35996	7.72795	7.04258	THPO	-1.01042	6.8116e-05	0.619651	0.422204	0.0918768	1	-0.0535128	0.834872	1	-1.48615	6.20876e-09	6.68622e-05	-3.51997	NA
ENSG00000090539	CHRD	22.0699	21.3695	22.1482	24.4289	24.7398	25.0467	36.8862	20.311	19.5106	24.3444	22.768	22.026	CHRD	0.178505	0.422693	1	0.224563	0.312204	1	-0.102351	0.645379	1	-0.148411	0.502859	1	-0.660889	NA
ENSG00000090565	RAB11FIP3	103.214	102.174	103.947	78.9712	80.8103	80.8191	76.4582	86.4502	86.9478	58.9194	59.4873	55.7423	RAB11FIP3	-0.362657	0.000912557	1	-0.307794	0.00491402	1	-0.466525	2.08619e-05	0.274731	-0.521385	2.09096e-06	0.0204705	1.69394	NA
ENSG00000090581	GNPTG	27.5982	28.0555	27.8363	29.0327	31.4623	31.3111	49.5444	28.9781	28.847	30.9702	31.5355	29.6641	GNPTG	0.137126	0.495379	1	0.361996	0.0716193	1	0.00571036	0.978127	1	-0.219163	0.273841	1	-0.605431	NA
ENSG00000090612	ZNF268	21.995	23.2798	22.1997	30.0665	30.1396	30.6621	18.149	22.2464	21.576	26.5622	26.5034	27.2668	ZNF268	0.429986	0.000273231	1	-0.120931	0.308263	1	-0.177974	0.128985	1	0.372946	0.0016148	1	-3.08396	NA
ENSG00000090615	GOLGA3	57.8633	58.9256	57.4967	68.7437	69.1926	65.7509	22.0347	51.4284	51.7683	62.3494	61.4466	60.1189	GOLGA3	0.225013	0.397809	1	-0.476389	0.0739196	1	-0.147387	0.579462	1	0.554019	0.0377438	1	-1.16295	NA
ENSG00000090621	PABPC4	184.396	184.011	193.753	97.5517	96.7915	96.5223	287.763	176.857	176.4	105.52	107.37	105.432	PABPC4	-0.950846	2.84909e-07	0.00291605	0.189186	0.302652	1	0.130172	0.478851	1	-1.00986	5.11739e-08	0.0005362	-5.33792	NA
ENSG00000090661	CERS4	43.2461	42.5354	45.0895	23.9465	23.9626	24.4118	115.697	46.0094	45.169	20.5012	20.2872	19.4196	CERS4	-0.856469	0.00685338	1	0.660489	0.036294	1	-0.264817	0.40105	1	-1.78178	3.67854e-08	0.000386946	-2.69766	NA
ENSG00000090674	MCOLN1	5.09151	4.7501	5.18707	7.99871	8.9359	8.24308	12.69	7.26831	6.42951	9.4813	9.05294	9.52356	MCOLN1	0.74774	0.00132997	1	0.811157	0.000527028	1	0.156773	0.494992	1	0.0933086	0.694199	1	0.115031	NA
ENSG00000090686	USP48	70.0443	66.2993	66.5014	53.1818	54.9841	51.6702	39.3177	55.0131	54.0856	49.9795	50.0432	51.9651	USP48	-0.343938	0.0171604	1	-0.450022	0.00184872	1	-0.0726891	0.614674	1	0.0333978	0.815397	1	-0.0742137	NA
ENSG00000090776	EFNB1	10.751	11.0158	10.6689	7.21304	6.97235	6.62056	8.37521	9.94418	9.73756	6.45082	5.85322	6.47111	EFNB1	-0.642607	2.60517e-07	0.00266978	-0.206471	0.0961535	1	-0.148842	0.24077	1	-0.584964	3.86379e-06	0.0371928	2.83315	NA
ENSG00000090857	PDPR	59.831	62.8035	55.933	74.4364	70.8426	67.3875	55.0035	47.4062	48.7625	49.6076	47.3086	49.3029	PDPR	0.252341	0.0326651	1	-0.240917	0.0425722	1	-0.540741	4.79865e-06	0.0634861	-0.0474798	0.687649	1	0.19708	NA
ENSG00000090861	AARS	156.342	154.249	159.418	115.65	113.564	113.453	569.678	549.324	544.718	264.083	270.5	266.263	AARS	-0.455997	1.06459e-05	0.101604	1.82381	3.51975e-66	4.75378e-62	1.22494	1.03867e-31	1.40117e-27	-1.05488	3.28762e-24	4.13188e-20	-0.578392	CBP/p300 activity.dependent
ENSG00000090863	GLG1	350.076	352.688	345.698	488.941	489.108	482.922	257.703	368.106	370.416	501.81	498.469	500.117	GLG1	0.478689	0.00143769	1	-0.0735966	0.623294	1	0.0384179	0.797669	1	0.590703	8.54654e-05	0.738336	-8.02623	NA
ENSG00000090889	KIF4A	60.2808	59.5178	60.6759	19.0946	18.5083	19.4879	25.2291	44.966	46.1261	21.8649	21.725	21.4685	KIF4A	-1.66202	1.63208e-15	1.93907e-11	-0.633054	0.00190343	1	0.188768	0.356433	1	-0.840198	4.26762e-05	0.37969	1.32721	NA
ENSG00000090905	TNRC6A	68.5826	69.5086	68.8557	72.4929	71.6471	69.8707	67.6856	65.9185	64.4967	62.5973	62.9548	63.0598	TNRC6A	0.048454	0.636506	1	-0.0632164	0.539182	1	-0.18235	0.074394	1	-0.0706788	0.490449	1	1.11804	NA
ENSG00000090924	PLEKHG2	17.816	19.0199	17.1475	46.6483	46.5162	47.0707	14.3825	18.0896	18.3687	45.8608	44.1935	44.2713	PLEKHG2	1.37894	1.92488e-26	2.43382e-22	-0.0840273	0.514304	1	-0.0621481	0.622627	1	1.40082	3.51737e-27	4.47093e-23	-16.671	NA
ENSG00000090932	DLL3	1.00619	1.19698	0.959674	1.93387	2.0089	1.68245	2.36789	0.772199	0.686603	1.38165	1.72319	1.42552	DLL3	0.849738	0.0392786	1	0.263235	0.528059	1	-0.318163	0.432953	1	0.268306	0.535024	1	1.01926	NA
ENSG00000090971	NAT14	15.5484	14.588	13.9168	20.1835	21.2627	21.9992	49.4729	14.3198	13.986	19.8951	19.2441	19.1966	NAT14	0.527182	0.202929	1	0.820423	0.0482468	1	-0.12131	0.769138	1	-0.414564	0.315343	1	-0.505305	NA
ENSG00000090975	PITPNM2	23.9065	24.4642	23.4027	22.3338	21.7399	20.9975	19.0311	24.4006	23.9437	19.11	17.8768	17.4822	PITPNM2	-0.141521	0.272867	1	-0.0893887	0.486531	1	-0.256969	0.0464107	1	-0.309097	0.0173883	1	3.45789	NA
ENSG00000090989	EXOC1	20.552	20.1852	19.1925	28.0678	26.3898	25.8792	12.4993	22.6335	22.063	25.7495	25.9677	26.0263	EXOC1	0.423397	0.0356106	1	-0.065335	0.743639	1	-0.0473991	0.813979	1	0.441334	0.0281794	1	-6.75494	NA
ENSG00000091009	RBM27	19.9148	20.2807	19.8798	24.2222	23.3217	24.6799	11.3789	22.3474	22.9866	26.4107	27.8989	27.4061	RBM27	0.266066	0.240382	1	-0.0812951	0.718132	1	0.17835	0.429909	1	0.52571	0.0202161	1	-6.46668	NA
ENSG00000091039	OSBPL8	52.766	53.3858	52.9944	81.4385	76.6923	73.0734	26.3018	51.176	53.8169	78.4109	75.4295	78.0712	OSBPL8	0.53907	0.0184629	1	-0.276893	0.22542	1	0.00440718	0.984868	1	0.820372	0.000352062	1	-2.96278	NA
ENSG00000091073	DTX2	11.7442	12.353	11.7	13.1401	13.7221	12.899	29.973	11.5766	11.0138	12.4016	12.1681	11.3634	DTX2	0.1519	0.646168	1	0.553593	0.0937424	1	-0.146401	0.657522	1	-0.548104	0.0966039	1	-0.990083	NA
ENSG00000091127	PUS7	39.3482	40.5678	41.1715	22.5681	22.449	21.971	23.6796	41.903	43.0364	23.8347	24.2058	23.601	PUS7	-0.854939	2.55529e-05	0.238971	-0.155803	0.438516	1	0.0970111	0.631967	1	-0.602123	0.00296792	1	3.86463	NA
ENSG00000091129	NRCAM	1.02493	0.986849	0.701906	1.57549	1.76346	1.72477	0.53232	1.20976	1.00565	1.86377	1.75138	1.95517	NRCAM	0.926526	0.000438202	1	0.0502352	0.941737	1	0.139997	0.578715	1	1.01622	7.01044e-05	0.61103	20.2293	NA
ENSG00000091136	LAMB1	161.814	159.158	158.868	167.725	162.407	157.219	62.608	179.399	181.555	137.767	137.295	139.469	LAMB1	0.0224108	0.943761	1	-0.179833	0.570548	1	-0.233528	0.461566	1	-0.0312825	0.921784	1	0.173953	NA
ENSG00000091138	SLC26A3	1.19359	1.29249	1.33773	0.0730607	0.0589812	0.0740361	0.842221	1.22659	0.837732	0.0592593	0.0599009	0.0595857	SLC26A3	-5.00151	5.4527e-38	7.0787e-34	-0.397003	0.0978235	1	-0.384479	0.796085	1	-4.98512	4.62835e-32	5.96224e-28	12.5569	NA
ENSG00000091140	DLD	67.6269	71.0177	66.1234	79.5363	79.3377	77.2919	41.7731	61.5597	62.3977	67.9558	67.3104	68.0775	DLD	0.205923	0.189367	1	-0.304436	0.052595	1	-0.215971	0.168231	1	0.294389	0.0606344	1	-0.966999	NA
ENSG00000091157	WDR7	5.78489	5.81986	5.56513	21.1071	21.6309	20.2356	2.32021	7.72271	7.87364	20.3772	19.3146	19.9214	WDR7	1.88039	1.53964e-07	0.00159245	0.0657147	0.85948	1	-0.0792315	0.819306	1	1.73544	1.10347e-06	0.0109673	26.4087	NA
ENSG00000091164	TXNL1	55.5583	53.0037	56.7234	47.4202	48.398	46.718	92.287	58.3621	59.1568	57.5006	57.0487	55.4914	TXNL1	-0.213776	0.225499	1	0.343543	0.0512847	1	0.254696	0.148323	1	-0.302625	0.0855849	1	-0.880895	NA
ENSG00000091262	ABCC6	76.3409	74.5517	73.8392	36.0486	36.6439	36.9405	122.038	117.534	115.494	34.8271	34.5097	34.1104	ABCC6	-1.03611	4.01478e-23	5.01165e-19	0.659991	1.74137e-10	2.32264e-06	-0.0838509	0.42238	1	-1.77995	3.64533e-63	4.84063e-59	-2.69694	CBP/p300 activity.dependent
ENSG00000091317	CMTM6	58.5192	60.2055	61.0368	131.088	132.872	129.255	46.8507	60.045	60.92	113.812	114.517	115.119	CMTM6	1.1296	1.30471e-18	1.58901e-14	-0.0984405	0.438814	1	-0.195275	0.122466	1	1.03277	7.53309e-16	9.02313e-12	-10.4913	NA
ENSG00000091409	ITGA6	131.324	135.012	132.542	46.8689	44.2254	43.6705	39.0555	142.795	148.34	46.3429	47.5905	48.7314	ITGA6	-1.56613	5.45671e-05	0.500053	-0.272523	0.472555	1	0.0822394	0.828715	1	-1.21137	0.00163958	1	4.44503	NA
ENSG00000091428	RAPGEF4	0.856269	1.04416	0.959674	0.638194	0.686229	0.596065	0.603835	1.4622	1.52621	0.70668	1.00431	0.881934	RAPGEF4	-0.596984	0.0717972	1	0.35788	0.296281	1	0.450564	0.165948	1	-0.504557	0.118132	1	-1.40985	NA
ENSG00000091436	MAP3K20	15.6983	16.3264	16.2195	14.0222	14.2948	13.1953	16.671	12.1825	11.5511	12.9526	13.5917	13.7468	MAP3K20	-0.217224	0.152802	1	-0.259891	0.0916575	1	-0.0432303	0.777762	1	-0.000557268	0.991132	1	0.00214424	NA
ENSG00000091483	FH	64.7222	63.4148	62.738	49.2259	47.5526	49.1588	72.0004	60.937	60.0132	43.4915	44.5318	44.8845	FH	-0.387478	0.000902994	1	0.0149871	0.896582	1	-0.135007	0.247617	1	-0.537471	4.29822e-06	0.0412672	-35.8623	NA
ENSG00000091490	SEL1L3	2.35547	3.10726	2.76405	3.58792	4.06791	3.0369	1.48586	3.11147	3.33976	3.65451	3.73887	3.89256	SEL1L3	0.382176	0.16102	1	-0.0419623	0.874064	1	0.0783463	0.772411	1	0.50248	0.0621348	1	-11.9746	NA
ENSG00000091513	TF	8896.11	8770.16	8800.6	2637.9	2615.53	2651.24	10040.8	7221.22	7246.33	2574.6	2574.38	2580.6	TF	-1.74342	2.00578e-29	2.55938e-25	-0.110923	0.460997	1	-0.0323151	0.829951	1	-1.66481	4.2614e-27	5.41453e-23	15.0088	NA
ENSG00000091527	CDV3	155.724	158.585	154.4	118.255	117.791	118.095	90.0462	182.764	184.947	137.244	138.832	137.782	CDV3	-0.404457	0.0807551	1	-0.0338768	0.883279	1	0.224865	0.331062	1	-0.145716	0.529085	1	4.30133	NA
ENSG00000091542	ALKBH5	94.9498	96.0996	95.3199	88.3304	90.5872	91.81	110.023	88.8737	88.711	88.012	91.3576	89.7234	ALKBH5	-0.0810613	0.503024	1	0.00573649	0.961223	1	-0.00874012	0.942816	1	-0.0955378	0.428865	1	-16.6544	NA
ENSG00000091583	APOH	1572.82	1560.54	1565.03	79.5363	81.424	80.9461	1942.11	1285.08	1277.19	71.7301	73.2446	75.4369	APOH	-4.28015	3.17672e-109	4.26919e-105	-0.0608678	0.718009	1	-0.134302	0.427657	1	-4.35358	3.69077e-112	4.96187e-108	71.5252	NA
ENSG00000091592	NLRP1	12.2127	10.6338	11.7687	32.5613	34.7076	33.7378	14.5017	9.74222	9.62002	23.8761	25.6999	24.744	NLRP1	1.54731	1.03599e-19	1.27044e-15	-0.0359362	0.84589	1	-0.443106	0.00748487	1	1.14014	1.9576e-11	2.21659e-07	-31.7268	NA
ENSG00000091622	PITPNM3	0.687609	0.681204	0.581614	1.16198	1.25893	1.08988	0.270095	0.486101	0.485097	1.47807	1.3567	1.30008	PITPNM3	0.882538	4.36347e-05	0.402356	-0.641344	0.0148789	1	0.241402	0.196466	1	1.76561	6.61776e-15	7.85859e-11	-2.75299	NA
ENSG00000091640	SPAG7	30.2406	30.6917	29.3141	46.6483	48.0162	47.7479	58.4124	26.3696	25.455	42.3482	43.7565	44.2155	SPAG7	0.65867	0.0183325	1	0.287958	0.300949	1	-0.1281	0.64496	1	0.24261	0.384375	1	0.842517	NA
ENSG00000091651	ORC6	27.1297	27.3869	26.8052	6.55142	6.67236	5.98566	24.5378	29.0286	27.4869	9.56395	9.81411	10.1229	ORC6	-2.08674	1.28855e-64	1.71326e-60	-0.00358771	0.973722	1	0.621109	4.93655e-07	0.00656709	-1.46206	5.88249e-34	7.60488e-30	407.519	NA
ENSG00000091732	ZC3HC1	16.9914	16.7084	16.8382	21.6446	21.59	23.3114	21.8917	15.7839	16.0346	21.2726	20.8933	20.1583	ZC3HC1	0.397561	0.00638842	1	0.085259	0.557202	1	-0.0946545	0.513745	1	0.217647	0.138322	1	2.55277	NA
ENSG00000091844	RGS17	1.77453	1.71276	1.18307	1.16198	1.29984	1.17453	0.86606	1.76513	1.62696	1.42298	1.15936	1.39764	RGS17	-0.366376	0.184897	1	-0.116546	0.653582	1	0.133495	0.630484	1	-0.116333	0.700125	1	0.998172	NA
ENSG00000091947	TMEM101	52.5224	49.7563	50.8635	61.6864	66.6564	66.5268	129.237	62.3843	60.4834	68.1349	70.2845	71.8408	TMEM101	0.347816	0.178028	1	0.719022	0.00552463	1	0.109716	0.670516	1	-0.261494	0.310297	1	-0.363681	NA
ENSG00000092010	PSME1	244.738	241.281	241.079	207.891	211.51	218.494	555.614	199.661	195.559	156.625	157.368	159.93	PSME1	-0.188859	0.581859	1	0.386989	0.259607	1	-0.428737	0.21191	1	-1.00458	0.00370814	1	-2.5959	NA
ENSG00000092020	PPP2R3C	26.3052	26.4509	25.8085	20.5833	20.7718	20.7718	41.8207	29.8196	28.4272	26.1352	26.5598	26.4862	PPP2R3C	-0.339068	0.0280687	1	0.347887	0.0237911	1	0.350389	0.022879	1	-0.336574	0.0283143	1	-0.96748	NA
ENSG00000092036	HAUS4	17.9284	17.8737	17.199	8.74304	8.84045	8.22897	13.7866	21.4723	19.1076	9.5364	9.53219	9.78838	HAUS4	-1.0404	2.22682e-10	2.46687e-06	0.0391727	0.816725	1	0.161332	0.326487	1	-0.918246	1.99556e-08	0.000211609	-23.441	NA
ENSG00000092051	JPH4	1.62461	1.23519	1.20026	0.445222	0.45442	0.412649	1.00909	0.688053	0.753771	0.252108	0.25724	0.212905	JPH4	-1.6968	7.94017e-12	9.02083e-08	-0.769696	0.0014613	1	-0.951567	0.0023801	1	-1.87752	2.27084e-10	2.52426e-06	2.4393	NA
ENSG00000092094	OSGEP	21.4515	21.9235	22.6294	18.8052	18.6582	18.8812	28.1136	20.5803	19.1915	16.906	17.1861	15.7957	OSGEP	-0.228683	0.135854	1	0.0383947	0.798854	1	-0.175888	0.251512	1	-0.442963	0.00387027	1	-11.5371	NA
ENSG00000092096	SLC22A17	3.16129	3.52752	3.29677	4.38737	4.96788	4.64531	3.75053	1.98391	2.01318	3.62696	3.34419	3.07022	SLC22A17	0.491457	0.035494	1	-0.383945	0.119178	1	-0.483189	0.0369155	1	0.392285	0.105812	1	-1.02172	NA
ENSG00000092098	RNF31	34.5695	36.0596	33.8508	37.4959	36.3848	36.9546	6.84954	39.0252	38.9559	32.0997	30.9576	31.6433	RNF31	0.0852682	0.85724	1	-0.300276	0.525703	1	-0.227171	0.631224	1	0.158378	0.737573	1	-0.52744	NA
ENSG00000092108	SCFD1	103.12	103.168	103.912	133.445	131.208	135.294	79.0328	97.81	96.1835	133.607	133.757	133.531	SCFD1	0.366694	0.00183676	1	-0.183733	0.118759	1	0.00342173	0.977081	1	0.553849	2.63731e-06	0.0256663	-3.01442	NA
ENSG00000092140	G2E3	89.4777	90.6553	90.8519	67.1448	67.6927	65.7085	37.2914	80.2234	79.9959	75.4769	77.0223	76.0641	G2E3	-0.434446	0.0754532	1	-0.455938	0.0620862	1	0.188738	0.439336	1	0.210231	0.388629	1	-0.461096	NA
ENSG00000092148	HECTD1	438.697	454.22	440.11	477.445	458.209	434.359	157.462	411.004	414.143	413.472	407.27	421.158	HECTD1	0.0394877	0.893944	1	-0.439967	0.138022	1	-0.141653	0.632412	1	0.337803	0.254394	1	-0.767791	NA
ENSG00000092199	HNRNPC	558.952	546.41	555.934	578.687	586.631	576.619	462.357	426.015	429.239	485.597	490.152	491.406	HNRNPC	0.0683872	0.5229	1	-0.334454	0.00181095	1	-0.247686	0.0207058	1	0.155156	0.147495	1	-0.463907	NA
ENSG00000092201	SUPT16H	337.127	336.929	331.487	236.506	233.872	225.562	130.357	285.305	284.071	204.245	206.012	206.567	SUPT16H	-0.530994	0.0331566	1	-0.523007	0.0358692	1	-0.174131	0.483832	1	-0.182117	0.46426	1	0.348212	NA
ENSG00000092203	TOX4	106.419	110.331	108.397	128.731	124.663	129.354	119.749	122.364	123.555	137.533	137.732	141.378	TOX4	0.235359	0.0200175	1	0.169554	0.0943847	1	0.122452	0.22503	1	0.188256	0.0625497	1	1.1103	NA
ENSG00000092208	GEMIN2	24.806	23.7956	25.2758	22.1822	23.0217	22.7329	22.1539	21.3208	22.6339	24.5786	24.3327	26.2075	GEMIN2	-0.121214	0.257428	1	-0.160716	0.136264	1	0.145162	0.172082	1	0.184665	0.0848662	1	-1.14901	NA
ENSG00000092295	TGM1	1.39973	1.19698	1.35492	1.46522	1.38166	1.40027	1.70041	1.36123	1.27433	1.39543	1.70909	1.42552	TGM1	0.105235	0.593277	1	0.119695	0.504773	1	0.094466	0.609464	1	0.0799609	0.695828	1	0.668038	NA
ENSG00000092330	TINF2	47.0503	46.0885	47.3407	67.8615	68.6745	66.682	64.3005	43.7711	44.6988	65.311	64.7027	65.0948	TINF2	0.532941	0.000637704	1	0.120069	0.44049	1	-0.058781	0.705428	1	0.35409	0.0233018	1	2.94905	NA
ENSG00000092421	SEMA6A	32.1333	29.9849	31.5825	7.72304	7.8314	7.46709	20.5329	22.5998	21.8615	7.12579	6.55801	6.31779	SEMA6A	-2.02929	3.74915e-67	4.99012e-63	-0.527537	2.9065e-06	0.0378572	-0.203701	0.0908525	1	-1.70543	2.51684e-47	3.31166e-43	3.23282	NA
ENSG00000092439	TRPM7	37.5117	36.6518	36.9441	46.4691	43.2573	42.8804	8.6136	47.726	49.5853	53.1753	54.5538	54.9757	TRPM7	0.255387	0.588967	1	-0.068514	0.884586	1	0.295282	0.531942	1	0.619182	0.191088	1	-9.03731	NA
ENSG00000092445	TYRO3	37.343	37.4541	37.7689	20.6522	21.0309	19.6854	44.3715	44.3601	43.6577	19.4819	18.1869	18.7506	TYRO3	-0.876127	1.37372e-16	1.6497e-12	0.234113	0.0254532	1	-0.121505	0.254352	1	-1.23174	5.89996e-31	7.57732e-27	-5.26132	NA
ENSG00000092470	WDR76	8.70832	9.69772	9.24261	2.499	2.43161	2.0775	5.32387	9.72539	10.0734	2.66272	2.85084	2.48482	WDR76	-1.9937	9.45854e-17	1.13758e-12	-0.134754	0.550866	1	0.192735	0.42644	1	-1.66621	2.49918e-12	2.87481e-08	12.3648	NA
ENSG00000092531	SNAP23	8.98942	9.06733	8.64115	12.4095	12.8903	12.8002	3.15456	8.59783	8.96513	11.4098	12.7037	12.813	SNAP23	0.514555	0.0947726	1	-0.363345	0.238057	1	-0.0452563	0.883734	1	0.832657	0.00698821	1	-2.29164	NA
ENSG00000092607	TBX15	2.24303	2.22853	2.00793	0.431438	0.399877	0.285669	1.5097	3.39757	2.78562	0.954628	0.990215	1.10494	TBX15	-2.63441	3.01499e-16	3.60684e-12	0.260813	0.368601	1	1.52549	3.26476e-06	0.0432418	-1.3704	3.06831e-06	0.0297442	-5.25432	NA
ENSG00000092621	PHGDH	138.352	138.794	135.102	29.9149	31.0805	31.9742	843.25	397.961	389.676	126.678	128.373	127.802	PHGDH	-2.14976	3.61444e-15	4.27878e-11	1.98424	2.61441e-13	3.50095e-09	2.04302	6.14109e-14	8.25362e-10	-2.09098	1.60566e-14	1.89612e-10	-1.0538	CBP/p300 activity.dependent
ENSG00000092758	COL9A3	235.912	234.671	234.068	64.6086	70.0517	70.9147	219.418	161.475	162.613	77.364	77.0223	75.6041	COL9A3	-1.77769	8.53661e-35	1.10276e-30	-0.374942	0.0076099	1	0.161981	0.250066	1	-1.24077	3.07138e-18	3.7477e-14	3.30923	NA
ENSG00000092820	EZR	102.952	101.105	102.4	137.208	135.64	135.265	74.4081	83.4041	81.8766	124.46	124.637	124.22	EZR	0.413388	8.24195e-05	0.745567	-0.354277	0.000771717	1	-0.128593	0.219169	1	0.639074	1.33029e-09	1.456e-05	-1.80388	NA
ENSG00000092841	MYL6	139.251	132.261	136.803	193.845	196.088	199.785	443.549	85.7434	86.6959	165.344	167.629	167.805	MYL6	0.530436	0.313898	1	0.593224	0.260358	1	-0.235892	0.653537	1	-0.29868	0.569896	1	-0.503486	NA
ENSG00000092847	AGO1	69.8007	72.2976	70.3851	83.7266	81.8058	79.1261	31.8562	60.5836	63.6235	78.59	78.9816	79.5486	AGO1	0.203504	0.357435	1	-0.444717	0.0446736	1	-0.0451693	0.838208	1	0.603054	0.00653558	1	-1.35604	NA
ENSG00000092853	CLSPN	15.6234	15.887	15.8071	2.99521	2.79978	2.59953	19.5555	13.4783	14.5569	3.39279	3.37238	3.48836	CLSPN	-2.50736	6.98484e-48	9.17948e-44	0.00558882	0.967977	1	0.291251	0.0959141	1	-2.22171	4.26169e-39	5.55426e-35	-397.529	NA
ENSG00000092871	RFFL	26.3989	26.8138	27.0286	16.7376	15.6175	15.6361	7.68389	33.5725	34.4556	19.9089	20.4986	20.0329	RFFL	-0.742656	0.0777785	1	-0.083174	0.842337	1	0.3333	0.426993	1	-0.326185	0.437325	1	3.92172	NA
ENSG00000092929	UNC13D	55.4459	54.0926	54.1458	135.884	134.876	138.948	91.8818	52.7075	51.4324	117.201	117.618	116.875	UNC13D	1.32416	2.2114e-10	2.45023e-06	0.259536	0.206901	1	-0.220329	0.282645	1	0.844289	4.44125e-05	0.394694	3.25307	NA
ENSG00000092931	MFSD11	25.9679	23.4517	24.5712	28.826	27.9988	27.9673	21.5818	23.6264	24.246	29.4274	29.6608	27.7825	MFSD11	0.196783	0.0789117	1	-0.0903573	0.422474	1	0.0349708	0.75428	1	0.322112	0.00402504	1	-3.56487	NA
ENSG00000092964	DPYSL2	130.706	132.72	127.214	51.6932	50.757	49.695	37.5775	92.8454	94.4371	38.2571	37.3993	37.2743	DPYSL2	-1.3609	2.08906e-06	0.0206253	-0.796655	0.00495271	1	-0.430306	0.128028	1	-0.994549	0.000480406	1	1.24841	NA
ENSG00000092978	GPATCH2	10.6573	11.8372	10.9439	16.6963	16.6674	16.0171	8.68511	11.7786	11.6015	17.1539	16.3545	17.3986	GPATCH2	0.563861	6.38069e-05	0.582174	-0.0565591	0.685714	1	0.0439876	0.753148	1	0.664407	2.3735e-06	0.023163	-11.7471	NA
ENSG00000093000	NUP50	76.4346	79.996	81.3317	75.1531	74.7697	73.285	43.5848	83.7912	90.0712	81.1108	80.8845	83.4931	NUP50	-0.0911731	0.688763	1	-0.128412	0.572029	1	0.137319	0.546041	1	0.174558	0.44236	1	-1.35936	NA
ENSG00000093009	CDC45	25.1058	25.4002	26.4443	2.71954	2.84069	3.41784	45.1581	26.5715	27.7555	4.85293	4.18993	5.04943	CDC45	-3.11246	4.26473e-41	5.56632e-37	0.369735	0.0788066	1	0.65603	0.00312225	1	-2.82621	1.64574e-35	2.13255e-31	-7.64387	NA
ENSG00000093010	COMT	115.226	114.82	120.134	36.2278	36.1121	36.9123	263.281	97.4734	95.6461	36.1082	36.7791	35.3787	COMT	-1.68125	9.50557e-07	0.00954074	0.382078	0.253124	1	-0.0130922	0.969207	1	-2.07642	2.25711e-09	2.45573e-05	-5.43455	NA
ENSG00000093144	ECHDC1	58.8378	58.5627	58.3216	44.3051	44.6754	46.7603	66.3983	55.2487	58.8546	46.2465	44.6445	47.254	ECHDC1	-0.372665	0.00130884	1	0.0381411	0.740976	1	0.025366	0.82757	1	-0.38544	0.000881056	1	-10.1056	NA
ENSG00000093167	LRRFIP2	30.7466	31.3412	30.6545	30.8384	30.9987	30.3235	34.9552	37.5779	39.9298	36.2735	36.4549	37.0374	LRRFIP2	-0.00904389	0.935382	1	0.279135	0.0107483	1	0.252422	0.0198902	1	-0.0357612	0.745454	1	-0.128114	NA
ENSG00000093183	SEC22C	31.2525	31.6659	30.2765	31.307	31.3396	30.0131	22.6307	28.1535	27.6212	29.386	28.3781	29.8174	SEC22C	-0.00823364	0.947196	1	-0.247902	0.0422092	1	-0.0814034	0.502851	1	0.158269	0.192884	1	-0.638432	NA
ENSG00000093217	XYLB	47.1253	47.4257	46.155	10.7692	10.7631	11.0649	57.1489	60.4153	60.3323	13.049	12.8729	13.022	XYLB	-2.1129	3.78286e-82	5.0607e-78	0.338843	0.00122383	1	0.257346	0.0195098	1	-2.19441	5.06805e-89	6.78815e-85	-6.47617	NA
ENSG00000094631	HDAC6	70.9438	76.6339	72.1036	50.6043	52.816	48.5098	77.7932	76.5209	75.6971	61.578	59.8115	60.314	HDAC6	-0.53221	6.24807e-07	0.00631368	0.0662716	0.534184	1	0.2583	0.0153548	1	-0.340183	0.0014039	1	-5.13317	NA
ENSG00000094804	CDC6	56.664	54.8949	56.7234	5.18683	5.74512	5.2661	30.2114	49.2575	47.8221	6.87784	7.68566	7.62798	CDC6	-3.38414	2.0267e-64	2.6941e-60	-0.402046	0.027032	1	0.456252	0.0159198	1	-2.52586	4.277e-39	5.57379e-35	6.2825	NA
ENSG00000094841	UPRT	9.45792	9.90785	9.5863	22.2925	22.8035	23.7346	3.27376	8.14344	8.1759	26.879	27.8989	27.4201	UPRT	1.25198	7.08804e-06	0.0682649	-0.560808	0.0433894	1	0.256362	0.348926	1	2.06917	3.90924e-13	4.54684e-09	-3.68961	NA
ENSG00000094880	CDC23	42.4778	42.268	43.2164	38.5573	40.3665	38.4925	18.7212	37.6452	38.62	37.954	37.061	39.1699	CDC23	-0.124179	0.59329	1	-0.429157	0.0651152	1	-0.0402927	0.862745	1	0.264689	0.254306	1	-0.616765	NA
ENSG00000094914	AAAS	53.5156	52.9464	51.465	32.7268	33.1122	35.3039	85.6122	47.1538	45.5048	31.5211	31.8879	31.1694	AAAS	-0.643319	0.00382527	1	0.174201	0.431066	1	-0.096893	0.66271	1	-0.914413	4.20159e-05	0.374277	-5.24918	NA
ENSG00000094916	CBX5	69.1823	71.2469	71.9833	29.777	29.1306	27.1208	50.6887	83.9595	84.3786	36.6867	37.8927	37.8179	CBX5	-1.30487	3.83752e-12	4.37938e-08	0.0448267	0.809961	1	0.386062	0.0375701	1	-0.963636	2.39122e-07	0.00244431	-21.4969	NA
ENSG00000094975	SUCO	37.0994	38.0845	37.5627	51.4726	49.8979	49.314	13.6435	37.3423	38.8048	52.2937	54.5397	54.6273	SUCO	0.418738	0.176756	1	-0.327842	0.289925	1	0.0997067	0.747335	1	0.846289	0.00657655	1	-2.58139	NA
ENSG00000095002	MSH2	96.3178	98.0099	96.0588	55.1805	54.8886	54.7177	27.0885	79.7858	79.9623	53.8365	55.7096	54.7388	MSH2	-0.81771	0.0116996	1	-0.636027	0.0492622	1	-0.00440433	0.9894	1	-0.186084	0.564607	1	0.292573	NA
ENSG00000095015	MAP3K1	50.1987	53.7297	50.8635	46.8689	46.039	42.8522	13.7866	48.2814	49.7196	43.0783	44.8419	44.8845	MAP3K1	-0.189382	0.60725	1	-0.469293	0.203285	1	-0.0317768	0.931514	1	0.248139	0.500304	1	-0.528749	NA
ENSG00000095059	DHPS	1.08115	1.17788	1.16589	1.01036	0.904402	0.977004	1.05677	0.906834	0.736979	0.789329	0.863354	0.826181	DHPS	-0.251908	0.206954	1	-0.373477	0.0799999	1	-0.230038	0.26072	1	-0.10827	0.612885	1	0.289898	NA
ENSG00000095066	HOOK2	21.9762	20.1661	20.7219	12.9609	13.313	12.8567	32.7859	19.3013	19.3427	12.0572	13.1971	12.0603	HOOK2	-0.685174	0.000680436	1	0.182677	0.360864	1	-0.0687473	0.734629	1	-0.936599	3.61522e-06	0.0348724	-5.12706	NA
ENSG00000095139	ARCN1	168.598	175.434	171.482	179.634	180.856	172.851	88.6636	152.876	158.701	173.912	171.632	172.544	ARCN1	0.0490614	0.801812	1	-0.364906	0.0620577	1	-0.0418697	0.830335	1	0.372098	0.0570344	1	-1.01971	NA
ENSG00000095203	EPB41L4B	29.1911	29.1635	29.2798	22.2373	22.2036	22.3237	16.6472	33.9428	33.3473	22.8705	23.4587	22.6672	EPB41L4B	-0.392875	0.0878606	1	-0.0609642	0.789502	1	0.0474991	0.837152	1	-0.284411	0.21757	1	4.66522	NA
ENSG00000095209	TMEM38B	29.6034	29.5264	29.9328	31.5965	34.544	33.2158	20.6521	28.6752	29.0149	34.5241	34.7916	35.2533	TMEM38B	0.15793	0.276645	1	-0.183485	0.206327	1	0.0738315	0.610067	1	0.415248	0.00419958	1	-2.26312	NA
ENSG00000095261	PSMD5	20.9081	24.1776	22.7496	30.0389	30.1123	29.999	14.2633	22.1286	23.2552	27.0581	27.3068	26.988	PSMD5	0.41078	0.0194249	1	-0.183695	0.295722	1	-0.148295	0.39704	1	0.446184	0.0110881	1	-2.42894	NA
ENSG00000095319	NUP188	118.843	121.583	118.485	103.424	102.587	103.125	54.6936	105.434	105.99	97.2688	94.0499	94.3091	NUP188	-0.21544	0.323289	1	-0.431256	0.0482969	1	-0.114138	0.600747	1	0.10168	0.640565	1	-0.235777	NA
ENSG00000095321	CRAT	53.4407	53.2521	53.613	45.6146	47.9753	49.5257	134.577	69.6041	68.0567	50.4479	50.9735	50.8361	CRAT	-0.163748	0.488672	1	0.763913	0.00129209	1	0.0893901	0.705448	1	-0.838275	0.000418147	1	-1.09734	NA
ENSG00000095380	NANS	41.8031	40.1285	41.0168	22.2235	21.6445	23.1279	52.4766	31.8559	30.5598	16.9611	17.1439	17.0083	NANS	-0.876798	7.98306e-06	0.0766773	-0.0990445	0.614105	1	-0.390969	0.0461196	1	-1.16872	3.38497e-09	3.66864e-05	11.7999	NA
ENSG00000095383	TBC1D2	4.92285	4.7883	5.03241	7.59899	7.53141	7.56585	9.68633	6.88124	6.84932	6.18909	5.90961	5.48151	TBC1D2	0.625206	0.000111137	0.994563	0.664802	4.46337e-05	0.57091	-0.370135	0.0198993	1	-0.409752	0.010213	1	-0.616353	NA
ENSG00000095397	WHRN	10.7135	10.5764	11.1157	20.5419	20.5945	21.5054	9.87704	9.99466	10.4932	19.1926	18.3843	19.7263	WHRN	0.952507	2.66731e-18	3.24131e-14	-0.0935089	0.40992	1	-0.128652	0.225341	1	0.917367	6.7835e-17	8.20668e-13	-9.81047	NA
ENSG00000095485	CWF19L1	20.0085	19.5548	20.2579	13.3055	14.213	13.9431	29.1148	21.2198	20.9211	15.9004	14.959	15.4194	CWF19L1	-0.529885	0.000347802	1	0.25058	0.0883338	1	0.158923	0.283405	1	-0.621548	2.53039e-05	0.229987	-2.48044	NA
ENSG00000095539	SEMA4G	84.624	83.4536	83.2392	39.15	39.0574	37.7588	70.8085	68.5102	72.2547	30.9426	28.8292	29.5247	SEMA4G	-1.11638	9.2698e-26	1.1692e-21	-0.248461	0.0181426	1	-0.377355	0.000386189	1	-1.24527	3.00121e-31	3.85836e-27	5.01192	NA
ENSG00000095564	BTAF1	80.5949	80.1297	77.8776	96.6006	94.6643	87.6902	30.3067	75.1241	79.341	103.812	103.86	103.954	BTAF1	0.225509	0.434055	1	-0.368547	0.201367	1	0.159832	0.579024	1	0.753889	0.0092305	1	-2.04557	NA
ENSG00000095574	IKZF5	18.9966	18.1221	17.0444	15.6211	16.0811	15.3116	12.4039	24.3164	23.6918	18.9447	18.497	18.7506	IKZF5	-0.204508	0.357813	1	0.159658	0.475999	1	0.257731	0.245511	1	-0.106441	0.635218	1	-0.666684	NA
ENSG00000095637	SORBS1	82.0754	83.0333	79.4586	20.5971	21.6309	19.8547	15.1215	51.0245	50.8615	16.9611	17.9191	17.8446	SORBS1	-1.97951	7.7131e-08	0.000805094	-1.06361	0.00306421	1	-0.236086	0.508268	1	-1.15198	0.00139866	1	1.08309	NA
ENSG00000095739	BAMBI	31.8522	33.7481	32.1152	3.78089	3.30431	3.84111	53.7877	49.594	46.2437	4.54988	4.50004	4.79854	BAMBI	-3.17155	6.25168e-119	8.41164e-115	0.614685	3.82202e-07	0.00501754	0.344762	0.0122994	1	-3.44149	8.96009e-141	1.20692e-136	-5.59879	CBP/p300 activity.dependent
ENSG00000095752	IL11	3.01137	3.20277	3.29677	31.817	33.1395	31.8331	5.94368	5.88831	6.27838	53.4508	53.116	53.5262	IL11	3.35882	1.00446e-152	1.35471e-148	0.935656	1.37266e-12	1.83676e-08	0.726502	1.94928e-11	2.61418e-07	3.14958	5.62004e-154	7.57582e-150	3.36617	Dox.only
ENSG00000095787	WAC	134.622	138.756	135.24	164.665	161.453	158.432	134.338	184.935	186.727	194.299	194.524	194.9	WAC	0.245946	0.0802033	1	0.308737	0.0282685	1	0.268685	0.0557066	1	0.205894	0.142396	1	0.66689	NA
ENSG00000095794	CREM	8.78328	8.37963	9.13951	12.5336	12.5903	12.9696	10.7352	11.2064	12.3571	14.5229	14.6348	14.9176	CREM	0.535384	3.80853e-06	0.0371903	0.385472	0.00107857	1	0.210923	0.0609805	1	0.360816	0.00154122	1	0.936037	NA
ENSG00000095906	NUBP2	40.5476	41.3893	41.8416	30.287	31.0532	33.766	108.307	41.5833	39.0231	27.4989	27.8566	27.2946	NUBP2	-0.380469	0.252953	1	0.609822	0.0672411	1	-0.202726	0.54234	1	-1.19302	0.000393633	1	-1.95634	NA
ENSG00000095932	SMIM24	14.6114	15.1993	15.1369	3.21575	2.75887	3.24853	45.0151	9.89369	8.94833	2.69027	2.41388	2.28968	SMIM24	-2.2961	2.03255e-05	0.190958	0.506485	0.323941	1	-0.322411	0.538937	1	-3.12497	1.99932e-08	0.000211988	-6.16991	NA
ENSG00000095951	HIVEP1	12.7562	12.7924	12.817	9.88709	9.50861	9.72451	3.63134	16.76	16.2697	10.7073	10.237	11.447	HIVEP1	-0.398861	0.34881	1	-0.0642027	0.879492	1	0.154039	0.717778	1	-0.18062	0.673077	1	2.81328	NA
ENSG00000096060	FKBP5	36.1062	37.4159	36.0161	30.4938	31.1078	30.4504	19.1264	30.3918	32.8771	30.2814	30.6757	29.7477	FKBP5	-0.251116	0.168282	1	-0.409615	0.0247582	1	-0.0212944	0.907792	1	0.137209	0.450064	1	-0.33497	NA
ENSG00000096063	SRPK1	136.421	137.343	135.394	81.4936	80.6331	78.985	118.08	131.267	133.529	76.083	78.756	79.7437	SRPK1	-0.763166	1.27127e-12	1.46133e-08	-0.0955555	0.37108	1	-0.0396283	0.712005	1	-0.707238	4.8009e-11	5.40149e-07	7.40133	NA
ENSG00000096070	BRPF3	83.0124	84.7335	83.1704	136.436	136.172	132.641	44.3476	97.8773	101.876	161.735	158.256	160.933	BRPF3	0.691798	0.00702428	1	-0.0393376	0.877346	1	0.247053	0.333457	1	0.978188	0.000147245	1	-24.8665	NA
ENSG00000096080	MRPS18A	15.2486	15.5814	14.7932	12.1752	12.2494	12.8285	32.9766	16.7264	16.8071	14.2612	14.5643	13.6632	MRPS18A	-0.293016	0.223937	1	0.542915	0.0239929	1	0.19016	0.429587	1	-0.645784	0.00724457	1	-1.18947	NA
ENSG00000096088	PGC	216.31	213.066	221.007	31.8032	33.8622	34.3304	327.598	120.513	120.482	35.9567	35.0595	34.877	PGC	-2.70244	2.67429e-14	3.13882e-10	-0.194089	0.56061	1	0.0827431	0.804703	1	-2.42561	4.91384e-12	5.62389e-08	12.4974	NA
ENSG00000096092	TMEM14A	23.7378	21.3313	22.9387	21.1484	21.7399	21.2091	14.4064	12.6032	13.3143	11.8919	12.5628	13.1196	TMEM14A	-0.0856253	0.45554	1	-0.757206	9.89476e-11	1.32046e-06	-0.772001	2.37284e-11	3.1815e-07	-0.100394	0.391732	1	0.132584	NA
ENSG00000096093	EFHC1	12.7749	12.8115	12.5249	29.4876	29.4987	29.096	12.3801	13.613	13.0288	27.554	28.6318	28.8	EFHC1	1.21067	3.10625e-29	3.96078e-25	0.0356479	0.756808	1	-0.0517056	0.62135	1	1.12332	2.01617e-25	2.54682e-21	31.5114	NA
ENSG00000096384	HSP90AB1	3347.57	3303.38	3329.33	1898.38	1880.52	1894.46	3262.34	2761.23	2795.02	1716.54	1725.98	1740.97	HSP90AB1	-0.814886	1.05229e-11	1.19266e-07	-0.178547	0.133881	1	-0.130285	0.274002	1	-0.766624	1.54375e-10	1.72036e-06	4.29369	NA
ENSG00000096401	CDC5L	81.1384	78.6206	77.2246	89.695	87.301	87.1964	63.6569	67.7865	69.0138	83.7694	81.984	83.744	CDC5L	0.156885	0.132558	1	-0.241263	0.02116	1	-0.0825921	0.427544	1	0.315557	0.00252739	1	-1.30794	NA
ENSG00000096433	ITPR3	66.2214	68.4006	65.7453	50.3975	50.4706	49.187	10.3777	89.5132	90.9108	60.1041	55.3572	57.387	ITPR3	-0.417368	0.459	1	-0.0704057	0.900421	1	0.204128	0.716953	1	-0.142835	0.799927	1	2.02874	NA
ENSG00000096654	ZNF184	5.76615	5.62883	5.44483	7.11655	6.74054	7.50941	2.72547	5.72002	5.22048	6.89161	6.95269	7.27952	ZNF184	0.345163	0.134593	1	-0.295466	0.200796	1	-0.016506	0.945448	1	0.62414	0.00672737	1	-2.11239	NA
ENSG00000096696	DSP	1220.38	1239.04	1213.48	1064.77	1013.99	983.167	426.194	1158.23	1177.9	983.505	962.104	974.166	DSP	-0.262486	0.39364	1	-0.411022	0.182053	1	-0.068586	0.82352	1	0.0799508	0.794852	1	-0.194517	NA
ENSG00000096717	SIRT1	27.8981	28.342	27.2348	36.9859	37.8439	36.87	12.3801	41.213	41.693	51.054	51.9884	49.066	SIRT1	0.42061	0.234298	1	0.191849	0.588305	1	0.44578	0.206976	1	0.674536	0.0567555	1	3.51598	NA
ENSG00000096746	HNRNPH3	114.458	112.222	112.711	113.389	114.75	113.763	66.0169	84.5149	89.8529	111.65	112.417	114.324	HNRNPH3	0.0106406	0.935892	1	-0.497165	0.000163982	1	-0.0149009	0.90999	1	0.492907	0.000184223	1	-0.991434	NA
ENSG00000096872	IFT74	11.2382	10.5	10.8751	13.7879	13.4221	12.9837	9.44795	10.2639	10.7451	12.9388	12.7601	12.2833	IFT74	0.30223	0.00785043	1	-0.0967132	0.402945	1	-0.0818634	0.466275	1	0.317084	0.00541929	1	-3.2786	NA
ENSG00000096968	JAK2	3.89215	4.731	4.01852	13.333	12.5494	11.5163	1.53354	4.84489	5.22048	11.8644	12.2245	12.116	JAK2	1.57174	8.61108e-06	0.0825458	-0.118929	0.735175	1	-0.0469354	0.892258	1	1.64374	3.31554e-06	0.0320679	-13.8212	NA
ENSG00000097007	ABL1	69.8194	71.9346	71.5709	65.0634	63.9974	64.6645	52.9772	90.6071	88.8621	72.8045	70.1013	71.6039	ABL1	-0.139104	0.456575	1	0.124443	0.506519	1	0.147098	0.430792	1	-0.116449	0.533984	1	-0.935766	NA
ENSG00000097021	ACOT7	64.4223	62.7844	61.4492	37.2754	37.4348	39.4237	118.104	53.1619	52.9941	32.4716	32.6773	31.8942	ACOT7	-0.725474	0.00853277	1	0.249042	0.363974	1	-0.234226	0.394232	1	-1.20874	1.39498e-05	0.129649	-4.85356	NA
ENSG00000097033	SH3GLB1	73.8485	73.5966	74.5438	103.81	102.805	101.503	90.9044	95.5717	96.8888	117.725	121.226	124.861	SH3GLB1	0.473145	4.53987e-06	0.0442047	0.352462	0.00065025	1	0.239774	0.019455	1	0.360456	0.000458383	1	1.02268	NA
ENSG00000097046	CDC7	9.04564	8.76168	9.15669	5.11791	5.19969	5.18145	4.44185	6.72978	7.20195	4.43968	5.03567	5.02155	CDC7	-0.802495	6.91168e-06	0.0666009	-0.549335	0.00200972	1	-0.0971031	0.593631	1	-0.350232	0.0555963	1	0.637556	NA
ENSG00000097096	SYDE2	3.87341	3.20277	3.57172	2.71954	2.39071	2.51487	1.39051	4.45782	4.16258	2.70404	2.47026	3.01446	SYDE2	-0.486663	0.161905	1	-0.0829709	0.808678	1	0.104111	0.766895	1	-0.29958	0.399831	1	3.61066	NA
ENSG00000099194	SCD	2071.44	2106.13	2072.67	639.487	630.58	624.618	613.136	1314.13	1333.63	722.622	716.938	720.66	SCD	-1.722	1.39404e-11	1.57693e-07	-0.938631	0.000173033	1	0.189229	0.445304	1	-0.594142	0.0168894	1	0.632988	NA
ENSG00000099203	TMED1	6.96551	6.77499	5.99474	7.43358	7.53141	7.8057	5.34771	5.88831	5.65708	7.30486	7.2346	7.16802	TMED1	0.20821	0.0888141	1	-0.22193	0.0771928	1	-0.0691907	0.565611	1	0.360963	0.00340297	1	-1.62647	NA
ENSG00000099204	ABLIM1	194.272	207.66	201.125	61.2729	59.4294	58.118	124.421	240.321	243.316	75.5871	74.8093	76.984	ABLIM1	-1.75429	1.10074e-14	1.29744e-10	0.0121029	0.956737	1	0.346751	0.116942	1	-1.41964	2.73454e-10	3.03507e-06	-117.298	NA
ENSG00000099219	ERMP1	112.678	115.05	112.367	85.3531	84.2738	80.5652	36.5763	101.092	104.865	72.5015	72.8782	73.6667	ERMP1	-0.443032	0.155693	1	-0.487574	0.118271	1	-0.191875	0.538164	1	-0.147331	0.636948	1	0.302172	NA
ENSG00000099246	RAB18	48.9243	48.2089	47.9422	73.1131	73.4606	74.6253	21.5818	44.2087	44.6484	72.1847	76.4021	73.5552	RAB18	0.60885	0.00942142	1	-0.392866	0.0934881	1	0.00613811	0.979321	1	1.00786	1.9363e-05	0.177753	-2.5654	NA
ENSG00000099250	NRP1	18.3782	19.3064	18.4191	39.4394	38.7165	38.7747	6.65883	19.8903	19.7457	19.2339	21.0906	19.9353	NRP1	1.06069	0.00117743	1	-0.276067	0.394293	1	-0.957433	0.0033185	1	0.379339	0.241693	1	-1.37408	NA
ENSG00000099251	HSD17B7P2	5.78489	6.64128	5.90882	1.92008	1.818	2.0775	4.82326	2.45513	2.24827	2.22192	2.17425	2.17818	HSD17B7P2	-1.67189	5.7934e-10	6.36115e-06	-0.96182	0.000317278	1	0.179711	0.509664	1	-0.530299	0.0475336	1	0.551349	NA
ENSG00000099260	PALMD	20.7769	20.4526	21.478	7.26818	7.23143	6.87452	17.1955	17.3996	16.7399	3.61319	4.09126	4.14345	PALMD	-1.55679	1.02926e-41	1.34431e-37	-0.289385	0.00985518	1	-0.856445	2.82253e-12	3.7884e-08	-2.1238	8.84106e-68	1.17745e-63	7.33901	NA
ENSG00000099282	TSPAN15	0.668869	0.547485	0.598799	1.13441	1.2453	1.01933	0.770706	0.418784	0.535474	0.775554	0.609632	0.784367	TSPAN15	0.93973	0.000125515	1	-0.115351	0.768354	1	-0.670106	0.00321056	1	0.38522	0.180843	1	-3.33954	NA
ENSG00000099284	H2AFY2	55.2397	55.7737	56.0189	46.3727	48.7798	47.494	92.7161	70.9504	73.0103	51.2468	53.0314	50.7246	H2AFY2	-0.227818	0.0815256	1	0.502397	0.000122186	1	0.119916	0.358686	1	-0.610301	3.05612e-06	0.0296321	-1.21478	NA
ENSG00000099290	WASHC2A	35.8438	34.4931	34.8475	41.9205	42.0164	42.1185	27.7083	34.6496	35.4967	36.9485	36.5677	36.4102	WASHC2A	0.261342	0.0372009	1	-0.102943	0.411815	1	-0.19767	0.113844	1	0.166618	0.183352	1	-1.61854	NA
ENSG00000099308	MAST3	19.109	19.3637	18.9691	20.79	21.4127	21.4208	10.5207	21.0347	22.5835	17.0024	17.9614	17.6634	MAST3	0.147687	0.533357	1	-0.0836281	0.72237	1	-0.274182	0.246549	1	-0.0428621	0.861151	1	0.512532	NA
ENSG00000099326	MZF1	6.68441	7.06154	7.16329	10.5349	11.9494	11.474	16.4803	6.83075	6.76536	12.1812	11.2801	12.353	MZF1	0.701963	0.0218547	1	0.523032	0.0873097	1	0.0769698	0.80087	1	0.255877	0.404215	1	0.489219	NA
ENSG00000099330	OCEL1	25.668	25.4193	25.8944	14.8492	16.8174	16.1017	65.8262	23.0879	21.2738	12.8424	12.6051	13.1057	OCEL1	-0.689487	0.0586	1	0.517093	0.154714	1	-0.30986	0.394609	1	-1.51644	4.25993e-05	0.379091	-2.93262	NA
ENSG00000099331	MYO9B	48.1935	48.0752	47.5641	61.0523	61.2975	60.7281	39.0078	41.4487	44.6988	52.4177	52.2562	51.4215	MYO9B	0.348275	0.00134948	1	-0.200182	0.0667855	1	-0.230154	0.0334841	1	0.318305	0.00346817	1	-1.59008	NA
ENSG00000099338	CATSPERG	0.500209	0.509279	0.392584	1.21711	1.35438	1.03344	0.961414	0.856346	0.602642	1.7949	1.66681	1.71822	CATSPERG	1.42781	4.06057e-09	4.37608e-05	0.813853	0.00202072	1	0.533331	0.00626977	1	1.1467	1.17341e-07	0.00121471	1.40897	NA
ENSG00000099341	PSMD8	92.8509	95.7558	90.8175	138.655	142.867	148.697	262.542	89.2439	87.1661	139.792	137.479	136.681	PSMD8	0.622777	0.0849938	1	0.651577	0.071634	1	-0.0556202	0.877345	1	-0.0844219	0.814583	1	-0.129566	NA
ENSG00000099364	FBXL19	25.8179	26.8902	25.207	49.8462	51.2751	53.8712	27.3746	22.7513	23.3056	38.9734	39.6406	37.0931	FBXL19	0.993133	2.35657e-16	2.8227e-12	-0.0870228	0.480051	1	-0.421995	0.000409668	1	0.658163	5.69813e-08	0.000596138	-7.56311	NA
ENSG00000099365	STX1B	1.81201	1.9993	2.14541	0.679546	0.877131	0.737153	2.32021	1.61367	1.20716	1.0786	1.01841	0.854058	STX1B	-1.41251	3.7474e-08	0.000394189	-0.232737	0.374815	1	0.376199	0.153679	1	-0.803619	0.00152679	1	3.4529	NA
ENSG00000099377	HSD3B7	12.9998	13.6711	13.8137	4.44251	4.95424	4.92749	47.1844	11.543	11.6015	3.36524	3.66839	3.64168	HSD3B7	-1.50476	0.00147453	1	0.797106	0.08615	1	-0.427308	0.360475	1	-2.72915	3.12775e-08	0.000329884	-3.42383	NA
ENSG00000099381	SETD1A	70.0068	69.8524	69.9727	79.6466	78.5059	80.3535	56.5768	74.2322	76.8389	70.3664	65.4779	66.0426	SETD1A	0.184862	0.172584	1	-0.0144307	0.914041	1	-0.240569	0.075601	1	-0.0412748	0.763225	1	2.86021	NA
ENSG00000099385	BCL7C	12.7749	12.5631	12.6108	14.7665	15.3993	15.622	31.7609	9.28783	9.78794	12.0572	12.7742	11.8512	BCL7C	0.27149	0.495521	1	0.421112	0.290108	1	-0.320574	0.420469	1	-0.470199	0.237383	1	-1.11657	NA
ENSG00000099617	EFNA2	16.5416	16.8231	16.9928	4.75953	5.2815	5.68937	7.54086	18.342	17.6467	4.5361	4.18993	3.72531	EFNA2	-1.68435	6.9784e-09	7.47596e-05	-0.208674	0.459327	1	-0.339371	0.239698	1	-1.81502	6.44001e-10	7.09754e-06	8.69789	NA
ENSG00000099622	CIRBP	72.6866	73.7685	73.0659	95.4566	101.237	102.631	129.38	87.3758	84.5465	111.732	111.247	109.766	CIRBP	0.447509	0.0065282	1	0.456511	0.00554118	1	0.152752	0.351715	1	0.143748	0.38204	1	0.314884	NA
ENSG00000099624	ATP5F1D	81.9817	84.1413	87.1916	33.4435	33.4395	35.6002	391.175	74.2826	71.4151	27.4162	26.9122	26.8347	ATP5F1D	-1.30629	0.0171971	1	1.08381	0.0469027	1	-0.336823	0.533225	1	-2.72692	2.09307e-06	0.020489	-2.51606	NA
ENSG00000099625	CBARP	6.51575	6.94692	6.88833	8.12277	7.80413	8.72278	14.2633	8.19393	8.24306	9.63282	8.29177	8.6594	CBARP	0.277494	0.196505	1	0.591236	0.00585964	1	0.109464	0.608545	1	-0.204304	0.334056	1	-0.345555	NA
ENSG00000099725	PRKY	6.12221	5.89627	5.66823	3.46386	3.2634	3.6718	5.39539	5.83782	6.00971	3.40656	2.83675	3.09809	PRKY	-0.771241	1.0578e-08	0.000112815	-0.033691	0.799189	1	-0.155544	0.264768	1	-0.893076	6.49463e-11	7.28763e-07	26.5078	NA
ENSG00000099769	IGFALS	2.29925	2.17122	2.11104	1.49279	1.64074	1.95052	6.70651	2.16903	2.55053	1.0786	1.00431	1.11888	IGFALS	-0.378327	0.323947	1	0.79736	0.0355371	1	-0.682244	0.0795507	1	-1.85788	1.93269e-06	0.0189597	-2.33004	NA
ENSG00000099783	HNRNPM	343.929	339.527	343.928	297.981	299.393	304.346	197.463	251.765	252.3	243.228	243.45	240.171	HNRNPM	-0.188244	0.134031	1	-0.550266	1.26148e-05	0.162983	-0.311058	0.0133459	1	0.0509651	0.684708	1	-0.092619	NA
ENSG00000099785	MARCH2	8.61462	9.27746	8.53805	13.9533	14.9766	15.6643	18.9357	8.34539	7.78968	12.3327	12.4923	12.7433	MARCH2	0.756712	0.0104052	1	0.406429	0.167896	1	-0.247881	0.397928	1	0.102393	0.732416	1	0.251934	NA
ENSG00000099795	NDUFB7	48.9431	50.5968	52.9257	44.2775	44.989	49.2999	177.701	40.6745	40.5847	36.4939	35.3273	36.7307	NDUFB7	-0.137995	0.773395	1	0.76433	0.112311	1	-0.35245	0.462286	1	-1.25478	0.00980774	1	-1.64167	NA
ENSG00000099797	TECR	115.264	111.114	114.532	72.672	72.6834	78.5758	483.43	96.5647	93.7486	70.0496	68.6072	68.3424	TECR	-0.606536	0.247027	1	0.982901	0.0621026	1	-0.113478	0.828074	1	-1.70292	0.00149577	1	-1.73254	NA
ENSG00000099800	TIMM13	54.1341	53.5577	56.1048	37.744	40.7892	41.7234	217.154	61.4082	60.0132	39.3866	39.1754	38.1106	TIMM13	-0.446078	0.287572	1	1.04775	0.0132114	1	-0.0436828	0.917193	1	-1.53751	0.000325307	1	-1.46745	NA
ENSG00000099804	CDC34	112.415	114.094	113.948	73.7472	77.4287	77.9833	338.373	133.269	130.725	89.0452	85.6911	82.8519	CDC34	-0.571311	0.0713729	1	0.823167	0.00959114	1	0.16878	0.593309	1	-1.2257	0.000129758	1	-1.489	NA
ENSG00000099810	MTAP	39.7417	40.3959	41.034	25.187	23.7853	23.6076	20.8666	38.6213	39.6779	22.9669	23.8252	24.3676	MTAP	-0.740126	0.000555015	1	-0.288229	0.17618	1	-0.0285528	0.894636	1	-0.480446	0.0249309	1	1.66689	NA
ENSG00000099812	MISP	11.9878	12.544	11.8203	0.445222	0.577143	0.567847	23.3697	15.9859	14.1203	0.307208	0.243145	0.296533	MISP	-4.59461	3.81999e-67	5.08402e-63	0.556209	0.00918274	1	-0.985884	0.00188615	1	-6.13592	4.18487e-98	5.61484e-94	-11.0317	NA
ENSG00000099814	CEP170B	45.5699	46.7953	46.2237	64.2364	65.3473	65.0454	36.7908	67.349	66.9316	77.6671	74.5414	76.0362	CEP170B	0.490185	0.0170956	1	0.304656	0.138687	1	0.229953	0.261665	1	0.415479	0.0427535	1	1.36376	NA
ENSG00000099817	POLR2E	204.26	201.547	205.129	138.352	143.699	149.572	428.173	174.703	164.393	123.772	120.141	117.976	POLR2E	-0.501342	0.108514	1	0.328625	0.292022	1	-0.25428	0.414878	1	-1.08425	0.000580809	1	-3.29935	NA
ENSG00000099821	POLRMT	100.553	103.874	105.459	58.3645	62.0611	63.6204	208.381	125.73	123.655	60.4898	55.1035	57.6797	POLRMT	-0.751964	0.000115666	1	0.562699	0.00379456	1	-0.087056	0.654214	1	-1.40172	1.26679e-12	1.46327e-08	-2.49106	NA
ENSG00000099834	CDHR5	7.71511	7.59641	7.19765	4.05656	4.72243	4.3067	17.0286	5.78733	6.19442	6.57479	6.33248	6.33173	CDHR5	-0.786594	0.0279365	1	0.36439	0.304218	1	0.559217	0.11723	1	-0.591804	0.0956736	1	-1.6241	NA
ENSG00000099840	IZUMO4	0.762569	0.776718	0.56443	1.01036	0.999853	1.03344	1.29515	0.553418	0.518681	0.995953	0.806972	0.979501	IZUMO4	0.555456	0.0998462	1	0.144805	0.683859	1	-0.133284	0.703534	1	0.277332	0.452911	1	1.91522	NA
ENSG00000099849	RASSF7	20.7207	18.5996	20.0173	22.3752	23.6626	24.4118	65.111	22.2632	21.173	26.6724	24.7273	24.5349	RASSF7	0.247975	0.498997	1	0.871486	0.0180746	1	0.108304	0.767695	1	-0.515218	0.159834	1	-0.591195	NA
ENSG00000099860	GADD45B	11.8192	11.1495	12.0609	9.44601	10.6267	10.4441	8.87582	7.3188	7.55459	15.9142	14.9167	15.3915	GADD45B	-0.199766	0.11382	1	-0.566799	1.20259e-05	0.15541	0.600475	1.3445e-06	0.0178523	0.967515	3.21958e-14	3.78816e-10	-1.70698	NA
ENSG00000099864	PALM	19.8399	20.2043	19.519	7.18547	7.1087	7.83392	57.7449	21.0179	21.4417	6.62989	6.20561	6.15054	PALM	-1.43222	3.29777e-05	0.306429	0.750425	0.0269357	1	-0.221884	0.516043	1	-2.40452	1.29703e-11	1.47356e-07	-3.20422	NA
ENSG00000099866	MADCAM1	2.39295	2.11391	2.64376	1.94765	1.99527	2.50076	5.56226	2.58977	2.46657	2.34589	2.11787	1.92729	MADCAM1	-0.153046	0.622295	1	0.567259	0.0636682	1	-0.0117186	0.975153	1	-0.732083	0.0163395	1	-1.29056	NA
ENSG00000099869	IGF2-AS	3.31121	3.24098	3.09055	0.789815	0.686229	0.850024	10.0439	4.15489	4.36408	0.70668	0.764685	0.784367	IGF2-AS	-2.0948	1.60823e-09	1.74735e-05	0.946698	0.00347811	1	-0.0458387	0.917524	1	-3.08736	3.11005e-18	3.79426e-14	-3.26119	NA
ENSG00000099875	MKNK2	198.263	199.331	200.386	136.174	139.526	140.316	150.096	169.873	171.395	142.258	140.255	138.911	MKNK2	-0.523556	1.19099e-06	0.0118968	-0.283148	0.00851067	1	0.0186391	0.862742	1	-0.221769	0.0394868	1	0.783227	NA
ENSG00000099889	ARVCF	21.2641	22.1527	22.2513	16.2	16.8174	17.301	22.1062	24.9896	25.3878	15.8866	15.551	14.6946	ARVCF	-0.384787	0.000750202	1	0.14386	0.209383	1	-0.125503	0.273112	1	-0.654149	1.09368e-08	0.000116882	-4.54711	NA
ENSG00000099899	TRMT2A	17.816	16.9377	17.7661	17.3165	16.981	16.9059	41.63	18.8974	17.7978	15.9693	14.4093	14.7085	TRMT2A	-0.0366971	0.897881	1	0.576048	0.0420777	1	-0.183863	0.516242	1	-0.796614	0.00504033	1	-1.3829	NA
ENSG00000099901	RANBP1	196.352	193.218	198.513	46.6483	48.7116	47.8608	303.139	152.842	151.295	41.935	42.9389	40.3268	RANBP1	-2.03846	3.41495e-16	4.08394e-12	0.0461389	0.847667	1	-0.19413	0.421186	1	-2.27873	1.55138e-19	1.90835e-15	-49.3885	NA
ENSG00000099904	ZDHHC8	35.9375	35.1044	37.5111	33.664	32.5941	35.84	45.6826	35.3228	36.202	34.4965	34.5943	31.504	ZDHHC8	-0.0886137	0.512422	1	0.109567	0.416026	1	-0.0213951	0.874835	1	-0.219577	0.103189	1	-2.00404	NA
ENSG00000099910	KLHL22	5.52253	5.81986	4.98085	5.82088	6.04511	5.88689	8.9235	6.02295	6.69819	5.56922	5.23301	5.10518	KLHL22	0.122474	0.46838	1	0.404097	0.015671	1	-0.159179	0.337866	1	-0.440816	0.00764658	1	-1.09087	NA
ENSG00000099917	MED15	80.1452	85.574	80.9536	88.4131	88.8282	91.7535	98.1513	97.4734	95.8141	114.804	111.543	111.258	MED15	0.125046	0.224769	1	0.240656	0.0196346	1	0.327863	0.00140965	1	0.212252	0.0389639	1	0.881972	NA
ENSG00000099937	SERPIND1	704.131	709.815	714.805	7.39223	6.74054	7.15669	661.815	553.8	538.992	6.83651	6.45934	6.31779	SERPIND1	-6.64977	0	0	-0.278939	0.0268955	1	-0.118701	0.388606	1	-6.48953	0	0	23.2651	NA
ENSG00000099940	SNAP29	19.7274	20.6627	19.2956	21.0795	20.6354	21.0116	23.4412	21.5059	20.9379	18.1733	18.4125	17.6495	SNAP29	0.0719556	0.511811	1	0.141744	0.195862	1	-0.210167	0.0531038	1	-0.279955	0.0103073	1	-1.97508	NA
ENSG00000099942	CRKL	147.178	149.702	146.289	96.7247	96.0007	94.6458	72.1196	149.644	152.521	114.06	112.656	111.801	CRKL	-0.625098	0.00876784	1	-0.24349	0.305511	1	0.236385	0.320125	1	-0.145223	0.541693	1	0.596422	NA
ENSG00000099949	LZTR1	6.89055	6.94692	7.31795	7.08899	8.30866	8.27129	26.7309	6.56148	7.15158	7.78698	8.37635	8.19944	LZTR1	0.162583	0.719735	1	0.93602	0.0390231	1	0.0418385	0.927288	1	-0.731631	0.105089	1	-0.781641	NA
ENSG00000099953	MMP11	22.0325	22.2865	22.9902	3.16062	3.19522	3.26264	59.1991	38.3689	37.0752	3.04841	3.20324	3.29323	MMP11	-2.81852	6.21011e-45	8.14021e-41	1.00017	5.77927e-08	0.000763383	-0.0111974	0.957165	1	-3.82989	7.14557e-76	9.54291e-72	-3.82924	CBP/p300 activity.dependent
ENSG00000099956	SMARCB1	96.7488	96.7109	97.0383	112.728	114.15	116.966	188.047	111.543	111.783	118.992	116.222	116.652	SMARCB1	0.243291	0.2064	1	0.501702	0.0092848	1	0.0332838	0.862793	1	-0.225128	0.241732	1	-0.448729	NA
ENSG00000099968	BCL2L13	23.0069	22.6112	21.942	27.8197	27.1397	26.7398	23.5842	35.4574	35.0265	37.2377	39.1472	38.2361	BCL2L13	0.274535	0.0861557	1	0.479568	0.0028099	1	0.488922	0.00211795	1	0.283878	0.073625	1	0.591946	NA
ENSG00000099974	DDTL	1.41847	1.3689	1.32055	2.14062	2.29526	2.35967	2.29637	1.79879	1.47583	2.29079	2.25883	2.40119	DDTL	0.739417	5.01941e-05	0.461184	0.431083	0.0241535	1	0.0331679	0.846084	1	0.341401	0.0612329	1	0.791962	NA
ENSG00000099991	CABIN1	165.824	170.658	163.319	103.658	101.919	102.081	116.197	136.871	136.384	85.3673	85.6911	83.3955	CABIN1	-0.700176	4.82955e-10	5.3125e-06	-0.359668	0.00133529	1	-0.274011	0.0146398	1	-0.614517	4.82296e-08	0.00050588	1.70857	NA
ENSG00000099992	TBC1D10A	2.63657	2.87803	2.4891	6.35845	7.04052	6.77575	6.49196	2.99367	3.05429	8.36553	8.27768	7.71161	TBC1D10A	1.34403	1.20762e-06	0.0120569	0.645609	0.0199637	1	0.272762	0.307994	1	0.971108	0.000385125	1	1.50417	NA
ENSG00000099994	SUSD2	3.25499	2.95444	3.10774	3.40873	4.13609	4.32081	5.37155	3.16196	2.93675	3.66829	3.45696	3.65562	SUSD2	0.351665	0.12673	1	0.292939	0.204497	1	-0.139312	0.542351	1	-0.080605	0.715774	1	-0.27516	NA
ENSG00000099995	SF3A1	133.217	134.84	132.37	136.629	135.776	136.888	113.67	135.07	139.423	164.105	163.485	161.714	SF3A1	0.031608	0.784072	1	-0.0445457	0.698462	1	0.257649	0.0251299	1	0.333802	0.00375163	1	-7.49348	NA
ENSG00000099999	RNF215	3.77971	4.42535	4.29347	14.1187	14.9766	15.876	6.9449	5.23197	5.35482	17.1539	17.313	16.8411	RNF215	1.8545	8.22515e-35	1.06269e-30	0.484417	0.00166719	1	0.190579	0.173544	1	1.56062	2.26363e-26	2.8696e-22	3.22165	NA
ENSG00000100003	SEC14L2	7.37779	8.01668	7.78193	10.3144	11.4313	10.43	10.4968	6.79709	7.1012	10.845	9.98326	10.4156	SEC14L2	0.474916	0.00621257	1	0.0687491	0.688612	1	-0.0425254	0.806455	1	0.363638	0.0378258	1	5.28935	NA
ENSG00000100014	SPECC1L	29.0412	30.4816	30.9982	33.5262	33.7667	34.7819	42.7266	33.4884	35.8493	37.0449	35.4964	34.3752	SPECC1L	0.1734	0.169815	1	0.307089	0.0151197	1	0.066934	0.595002	1	-0.0667585	0.593857	1	-0.217392	NA
ENSG00000100023	PPIL2	35.038	35.4292	34.3148	34.6427	35.444	34.147	17.7199	27.312	27.8395	29.4962	29.7172	30.584	PPIL2	-0.0075486	0.964751	1	-0.522627	0.0017964	1	-0.215281	0.196309	1	0.299804	0.0723887	1	-0.573649	NA
ENSG00000100024	UPB1	1.41847	1.3307	0.994043	0.0730607	0.140796	0.102254	1.12828	0.772199	0.955277	0.0868091	0.0458052	0.0735238	UPB1	-4.00387	4.17952e-28	5.31175e-24	-0.411221	0.12751	1	-0.957836	0.176193	1	-4.54533	8.56958e-27	1.08782e-22	11.0533	NA
ENSG00000100027	YPEL1	0.650129	0.604793	0.684721	2.85738	2.78615	2.72651	0.961414	0.923663	0.804148	3.02086	2.87904	2.9169	YPEL1	2.15942	1.59787e-36	2.07005e-32	0.478553	0.0251078	1	0.075821	0.570546	1	1.75643	1.53705e-27	1.95652e-23	3.6703	NA
ENSG00000100028	SNRPD3	101.171	103.206	100.75	65.0083	67.1882	65.8919	130.333	77.5307	77.9136	55.9854	57.0064	57.9724	SNRPD3	-0.623491	0.00120724	1	-0.0950368	0.621623	1	-0.212556	0.268674	1	-0.741009	0.000122844	1	7.79707	NA
ENSG00000100029	PES1	92.3449	90.4261	91.144	52.8235	52.9933	54.3791	176.771	84.2288	83.052	53.8778	51.6924	52.0348	PES1	-0.774227	0.00280531	1	0.328656	0.202139	1	-0.0235343	0.927607	1	-1.12642	1.54939e-05	0.14335	-3.42735	NA
ENSG00000100030	MAPK1	204.129	203.113	202.362	193.294	187.524	184.336	55.4087	200.065	200.026	196.104	191.395	191.834	MAPK1	-0.109246	0.768179	1	-0.42035	0.257364	1	0.0357529	0.923189	1	0.346857	0.34968	1	-0.825163	NA
ENSG00000100031	GGT1	40.735	40.6442	39.6936	9.7079	9.26316	9.7104	121.608	55.4506	53.5986	10.1838	9.8282	9.50962	GGT1	-2.08112	5.66453e-13	6.54424e-09	0.929919	0.000864146	1	0.0417974	0.883113	1	-2.96924	2.3597e-23	2.95694e-19	-3.19301	NA
ENSG00000100034	PPM1F	26.9611	26.3745	26.8567	33.0713	32.8122	33.0747	23.7273	25.1242	24.2292	26.5622	25.6999	25.5803	PPM1F	0.30363	0.00325314	1	-0.133706	0.200199	1	-0.346605	0.000737041	1	0.0907359	0.382487	1	-0.678625	NA
ENSG00000100036	SLC35E4	0.350289	0.37556	0.289477	1.9063	1.92709	2.30324	0.460804	0.351466	0.518681	2.29079	2.13196	2.37331	SLC35E4	2.71287	2.82092e-32	3.62573e-28	0.424054	0.181204	1	0.150066	0.378352	1	2.43839	2.07604e-29	2.65795e-25	5.7502	NA
ENSG00000100056	ESS2	12.4376	12.6969	12.1468	15.7727	16.1902	16.2287	31.0219	12.7547	13.012	15.556	15.8893	15.726	ESS2	0.37114	0.215169	1	0.606558	0.0430042	1	-0.0309289	0.918437	1	-0.266359	0.37136	1	-0.439132	NA
ENSG00000100058	CRYBB2P1	12.6812	12.7924	11.889	14.4357	15.0311	15.5656	26.1111	15.2959	14.7584	22.292	22.5848	22.9041	CRYBB2P1	0.270046	0.191242	1	0.586979	0.00450896	1	0.590894	0.00400105	1	0.273939	0.18383	1	0.466693	NA
ENSG00000100060	MFNG	2.39295	1.94199	2.43754	1.45144	1.20439	1.62601	3.10689	1.76513	1.52621	1.9051	1.38489	1.69034	MFNG	-0.673813	0.0171874	1	-0.0969626	0.75467	1	0.223039	0.429628	1	-0.353825	0.204493	1	3.64908	NA
ENSG00000100065	CARD10	129.656	123.932	127.455	69.7775	70.5971	71.9023	132.288	124.888	125.385	69.0027	68.9596	66.0008	CARD10	-0.844289	4.51318e-16	5.38964e-12	0.00560124	0.956697	1	-0.0576598	0.578008	1	-0.90755	2.76175e-18	3.37127e-14	-162.027	NA
ENSG00000100068	LRP5L	3.92963	3.54662	3.09055	2.05792	2.18617	2.38789	7.73157	3.86879	4.19616	2.40099	2.58303	2.09455	LRP5L	-0.678917	0.0113831	1	0.578378	0.0276535	1	0.0953394	0.730445	1	-1.162	1.25012e-05	0.116499	-2.00907	NA
ENSG00000100075	SLC25A1	227.01	223.229	229.72	93.2787	97.3915	100.106	441.522	185.693	181.891	88.811	89.3419	87.6745	SLC25A1	-1.22579	4.50906e-05	0.4156	0.250782	0.397239	1	-0.129461	0.662336	1	-1.60604	1.20169e-07	0.00124303	-6.40412	NA
ENSG00000100077	GRK3	24.225	24.0248	23.0418	24.8287	25.7352	23.3819	17.41	30.6274	29.7706	24.7852	25.7704	25.8869	GRK3	0.0528551	0.787874	1	0.12793	0.516456	1	0.0479433	0.806486	1	-0.0271342	0.893816	1	-0.212101	NA
ENSG00000100079	LGALS2	7.24661	6.90871	7.30076	0.293601	0.304426	0.370323	34.7407	8.05929	7.50421	0.320983	0.25724	0.240781	LGALS2	-4.60359	1.08681e-13	1.26657e-09	1.23156	0.0198251	1	-0.268075	0.667749	1	-6.1029	3.28869e-20	4.05922e-16	-4.95543	NA
ENSG00000100083	GGA1	41.1098	41.1218	40.0373	49.1156	52.0797	54.1816	47.3751	39.9508	40.0306	52.1697	53.4966	51.6863	GGA1	0.345962	0.00365949	1	0.057997	0.625998	1	0.0182498	0.878319	1	0.306214	0.0102126	1	5.27982	NA
ENSG00000100084	HIRA	11.6692	12.4485	12.8514	7.40601	8.22684	7.67872	24.7046	15.9018	16.6055	8.29665	8.44683	7.92068	HIRA	-0.667397	0.000178511	1	0.628728	0.000360392	1	0.0816342	0.649446	1	-1.2145	8.94714e-12	1.01944e-07	-1.93169	NA
ENSG00000100092	SH3BP1	5.26017	4.42535	4.67153	11.0587	11.704	11.7703	18.6258	3.58269	3.55806	10.0874	11.1814	9.96958	SH3BP1	1.27148	0.019305	1	0.845402	0.117718	1	-0.145056	0.786595	1	0.280979	0.601728	1	0.332362	NA
ENSG00000100097	LGALS1	63.7477	61.4854	62.3256	125.105	125.413	131.738	239.419	43.8889	40.3328	93.8664	100.055	94.7969	LGALS1	1.02755	0.0675895	1	0.787161	0.159755	1	-0.404991	0.467444	1	-0.164605	0.767418	1	-0.209113	NA
ENSG00000100099	HPS4	32.5269	33.0604	32.9401	19.0671	20.2809	19.6289	15.7413	36.6523	36.8569	21.4655	22.4861	21.4546	HPS4	-0.741249	0.00561107	1	-0.141748	0.593515	1	0.149487	0.575429	1	-0.450014	0.0920994	1	3.17475	NA
ENSG00000100100	PIK3IP1	4.96033	5.89627	5.49639	14.5046	13.8721	14.973	6.75419	7.23466	7.05082	17.5534	18.4407	17.4962	PIK3IP1	1.41145	7.04198e-31	9.02007e-27	0.366948	0.00425042	1	0.303859	0.00825282	1	1.34833	2.93929e-29	3.76229e-25	3.67445	NA
ENSG00000100104	SRRD	12.5688	12.2193	12.8342	10.2455	11.1585	11.0084	7.49319	14.1347	14.0531	10.1976	10.829	10.0811	SRRD	-0.215644	0.318871	1	-0.0735555	0.730435	1	-0.0594567	0.784837	1	-0.201542	0.356133	1	2.73999	NA
ENSG00000100105	PATZ1	79.939	81.8299	82.0534	75.5253	73.4743	77.2778	65.111	87.0561	86.5952	69.2644	68.5508	66.7116	PATZ1	-0.10779	0.422499	1	-0.0296795	0.824115	1	-0.145857	0.277472	1	-0.223967	0.0961987	1	7.54619	NA
ENSG00000100106	TRIOBP	33.2015	32.0289	31.445	76.1455	79.3513	80.3677	68.9729	35.5247	34.0022	81.5103	78.5869	78.2524	TRIOBP	1.28754	1.30446e-07	0.00135129	0.518201	0.0316316	1	0.0151279	0.949952	1	0.784457	0.00116721	1	1.51381	NA
ENSG00000100109	TFIP11	16.5229	16.4601	16.1164	21.0106	19.5446	19.5725	9.49563	18.3252	17.3948	18.187	17.8486	17.9004	TFIP11	0.29283	0.169814	1	-0.116576	0.582923	1	-0.157028	0.460529	1	0.252383	0.234909	1	-2.16496	NA
ENSG00000100116	GCAT	26.6425	28.1701	28.7986	28.9087	29.4442	30.2106	41.2963	23.7106	22.869	33.8904	31.5919	32.159	GCAT	0.0830708	0.69331	1	0.0703286	0.736577	1	0.140927	0.502029	1	0.153668	0.467125	1	2.185	NA
ENSG00000100124	ANKRD54	24.8435	24.254	23.9182	22.9679	24.1399	23.3396	43.2511	23.7106	23.6415	19.2202	18.9622	19.559	ANKRD54	-0.0517082	0.812872	1	0.310278	0.153299	1	-0.287347	0.186572	1	-0.649333	0.00289535	1	-2.09275	NA
ENSG00000100129	EIF3L	133.592	138.298	136.116	119.399	121.991	121.622	59.795	141.852	134.201	115.617	115.56	115.913	EIF3L	-0.168611	0.520044	1	-0.28056	0.284498	1	-0.0647221	0.805011	1	0.0472272	0.856694	1	-0.168332	NA
ENSG00000100138	SNU13	106.231	101.047	108.105	83.9885	83.783	84.558	200.395	96.4468	97.5772	77.8737	80.3771	79.7995	SNU13	-0.321908	0.199627	1	0.322397	0.198718	1	-0.0840737	0.737584	1	-0.728379	0.00383697	1	-2.25926	NA
ENSG00000100139	MICALL1	25.3494	26.7756	26.4959	51.1281	51.8751	53.1234	35.7419	31.7718	32.4909	58.8781	59.6141	56.8992	MICALL1	0.990518	9.79986e-19	1.19431e-14	0.346602	0.00203609	1	0.167959	0.126759	1	0.81187	3.25663e-13	3.79104e-09	2.34237	NA
ENSG00000100142	POLR2F	57.6947	55.7928	56.2079	27.4062	29.2942	29.9425	248.954	44.377	44.0103	24.9643	23.6843	23.2247	POLR2F	-0.970521	0.0829061	1	0.991468	0.0764678	1	-0.269934	0.62708	1	-2.23192	0.000117932	1	-2.25113	NA
ENSG00000100147	CCDC134	4.41687	4.21522	4.49968	4.01521	3.71338	3.72824	8.63744	5.13099	4.44804	4.24683	4.03488	4.17133	CCDC134	-0.198452	0.392282	1	0.46835	0.0408507	1	0.121216	0.598885	1	-0.545621	0.0167204	1	-1.16499	NA
ENSG00000100150	DEPDC5	7.65889	8.1886	8.22873	11.4722	10.7767	11.6574	9.16189	10.8361	9.90549	10.6108	10.0537	10.2762	DEPDC5	0.495253	4.21079e-05	0.388698	0.316075	0.0104992	1	-0.132301	0.264538	1	0.046867	0.693685	1	0.148278	NA
ENSG00000100151	PICK1	12.4001	13.2317	12.7998	17.9506	18.8491	19.502	23.4412	10.651	10.5268	14.826	13.5917	15.6424	PICK1	0.551952	0.0462733	1	0.213437	0.439768	1	-0.354333	0.199172	1	-0.0158189	0.952562	1	-0.0741151	NA
ENSG00000100154	TTC28	27.0173	28.3229	27.0114	46.7586	46.3799	44.4041	25.7535	29.8364	28.7798	46.6598	46.0259	46.4456	TTC28	0.74072	5.32428e-11	5.96638e-07	0.0361141	0.756494	1	0.0165672	0.882653	1	0.721172	1.6096e-10	1.79358e-06	19.9693	NA
ENSG00000100156	SLC16A8	0.256589	0.260943	0.134817	0.720897	0.61805	0.624282	0.0793867	0.166344	0.182839	0.871979	0.97612	1.00738	SLC16A8	1.7523	3.21971e-08	0.000339035	-0.633614	0.136824	1	0.561562	0.0128888	1	2.94849	8.69945e-20	1.07195e-15	-4.65344	NA
ENSG00000100162	CENPM	11.5568	11.7226	12.1124	1.42387	1.53165	1.17453	43.1557	12.8893	12.1053	1.93265	1.63862	1.88548	CENPM	-3.12689	1.49678e-11	1.69211e-07	0.945965	0.0266363	1	0.409548	0.355571	1	-3.66338	8.7324e-15	1.03523e-10	-3.87263	NA
ENSG00000100196	KDELR3	16.804	16.0207	17.9036	9.94222	10.654	10.2183	10.5922	9.28783	10.0566	9.2058	8.34816	8.33882	KDELR3	-0.721105	1.50811e-09	1.64053e-05	-0.764817	2.6443e-10	3.52538e-06	-0.251813	0.0372013	1	-0.208075	0.088421	1	0.272058	NA
ENSG00000100197	CYP2D6	0.725089	0.700307	0.90812	1.06549	1.04076	1.03344	1.05677	0.957322	0.888109	0.995953	1.27213	1.04919	CYP2D6	0.437262	0.0364958	1	0.310135	0.152796	1	0.080845	0.680293	1	0.207825	0.323657	1	0.670112	NA
ENSG00000100201	DDX17	343.405	348.658	341.832	516.619	492.449	490.513	130.596	305.618	310.199	486.19	479.919	477.635	DDX17	0.53651	0.046575	1	-0.469964	0.0811083	1	-0.0547479	0.838638	1	0.951727	0.000449297	1	-2.0251	NA
ENSG00000100207	TCF20	54.7337	56.8243	55.1597	47.4891	45.2481	43.4306	25.1576	64.4038	65.2356	46.8251	46.4629	45.6233	TCF20	-0.292189	0.316365	1	-0.106535	0.714248	1	0.0287931	0.921631	1	-0.156861	0.591353	1	1.47239	NA
ENSG00000100209	HSCB	3.36743	3.16457	3.7092	3.58792	3.05886	3.02279	14.2872	4.55879	4.51521	3.47544	3.73887	3.82287	HSCB	-0.0837977	0.836788	1	1.19322	0.00280682	1	0.192494	0.627251	1	-1.08461	0.0063459	1	-0.90898	NA
ENSG00000100211	CBY1	7.79007	7.17615	8.2631	7.21304	7.88595	7.49531	33.8348	7.10002	7.13478	6.86406	6.30428	6.86138	CBY1	-0.0401863	0.938403	1	1.05068	0.0403966	1	-0.174551	0.732341	1	-1.26544	0.0139525	1	-1.2044	NA
ENSG00000100216	TOMM22	83.5558	80.7601	82.9642	63.9056	64.8973	64.9043	139.011	67.8875	70.693	56.8394	57.4575	57.8052	TOMM22	-0.352415	0.14632	1	0.166433	0.4919	1	-0.170698	0.481478	1	-0.689546	0.00460467	1	-4.14308	NA
ENSG00000100219	XBP1	237.149	235.779	236.714	92.7136	94.4325	94.2931	297.537	350.233	343.666	200.002	196.243	197.59	XBP1	-1.33455	4.24493e-32	5.45261e-28	0.482593	1.46332e-05	0.188754	1.07748	1.01476e-21	1.3678e-17	-0.739656	3.47799e-11	3.92387e-07	-1.53267	NA
ENSG00000100220	RTCB	88.7843	88.6113	88.4633	78.7782	78.915	81.8632	118.009	95.4539	95.008	81.3863	85.2964	87.1309	RTCB	-0.150353	0.21896	1	0.21409	0.0798711	1	0.0834365	0.494809	1	-0.281007	0.0214401	1	-1.31257	NA
ENSG00000100221	JOSD1	57.8821	59.0975	58.8371	62.4859	62.5656	64.0437	46.3262	66.1373	65.8905	83.549	84.056	82.2944	JOSD1	0.105087	0.476372	1	0.0214777	0.887279	1	0.402405	0.00628836	1	0.486012	0.000980746	1	22.6287	NA
ENSG00000100225	FBXO7	125.309	125.059	129.173	94.726	96.1234	92.5718	98.2228	131.873	131.648	103.344	102.507	103.174	FBXO7	-0.421432	0.00171745	1	-0.068916	0.606921	1	0.124808	0.352505	1	-0.227708	0.0902056	1	3.30413	NA
ENSG00000100226	GTPBP1	57.957	57.5693	56.9468	73.7196	73.7061	74.8088	74.7418	75.0568	72.9935	91.7313	92.3725	91.2845	GTPBP1	0.365891	0.000314018	1	0.36947	0.000283474	1	0.3095	0.00216709	1	0.305918	0.00249987	1	0.82799	NA
ENSG00000100227	POLDIP3	97.6483	97.1694	97.657	75.3599	72.0289	76.6711	105.684	93.7878	92.2373	65.6416	66.7606	64.3003	POLDIP3	-0.384574	0.000462687	1	-0.00413076	0.971901	1	-0.187941	0.087031	1	-0.568384	2.42489e-07	0.00247775	137.598	NA
ENSG00000100228	RAB36	1.62461	1.50262	1.62987	1.65819	1.51801	1.62601	2.77315	1.37805	1.64375	0.968403	0.680111	1.11888	RAB36	0.0134481	0.971527	1	0.274827	0.318124	1	-0.81502	0.00365748	1	-1.07627	0.000133355	1	-3.91617	NA
ENSG00000100234	TIMP3	512.102	517.736	514.193	72.865	69.6835	72.0575	218.488	287.409	284.826	65.7931	65.8867	64.2585	TIMP3	-2.84746	3.52626e-92	4.7266e-88	-0.965355	2.24439e-13	3.00568e-09	-0.131346	0.317485	1	-2.01345	7.83471e-50	1.03332e-45	2.08571	NA
ENSG00000100239	PPP6R2	71.2999	69.0501	70.2477	64.6361	66.4245	66.7667	112.907	73.9461	71.583	72.6806	72.3848	73.151	PPP6R2	-0.09029	0.598994	1	0.294853	0.0857077	1	0.14158	0.409057	1	-0.243565	0.155221	1	-0.826055	NA
ENSG00000100241	SBF1	155.424	156.407	155.586	143.052	144.326	145.551	166.83	182.832	175.745	156.418	149.46	150.284	SBF1	-0.110603	0.285144	1	0.168874	0.102961	1	0.075439	0.465668	1	-0.204038	0.048615	1	-1.20823	NA
ENSG00000100242	SUN2	112.116	109.281	108.621	80.3496	81.8739	80.7486	36.7431	105.366	103.454	88.9074	87.2135	85.8765	SUN2	-0.441887	0.159269	1	-0.426249	0.174401	1	0.1088	0.728593	1	0.0931631	0.766021	1	-0.218565	NA
ENSG00000100243	CYB5R3	529.661	534.681	533.044	243.839	251.395	256.672	676.904	433.74	430.851	226.285	224.111	223.432	CYB5R3	-1.08718	7.78694e-10	8.52826e-06	-0.0514805	0.768602	1	-0.158192	0.365804	1	-1.19389	1.61811e-11	1.83397e-07	23.1912	NA
ENSG00000100246	DNAL4	8.42722	7.04243	7.55853	6.67547	6.65872	7.19902	21.7487	8.44637	9.04909	7.58036	7.5588	7.22377	DNAL4	-0.166149	0.602028	1	0.768942	0.0154796	1	0.12369	0.697771	1	-0.81143	0.0105392	1	-1.05525	NA
ENSG00000100253	MIOX	1.34351	1.12057	1.20026	1.57549	1.53165	1.56958	5.75297	1.79879	1.24074	1.56072	1.77957	1.82973	MIOX	0.359701	0.448276	1	1.27585	0.00741868	1	0.147342	0.761445	1	-0.76906	0.0977473	1	-0.602783	NA
ENSG00000100258	LMF2	103.12	101.448	103.878	66.6761	68.3745	71.9164	273.055	116.39	113.597	76.0141	74.175	74.5309	LMF2	-0.575828	0.0501182	1	0.705609	0.0164949	1	0.118779	0.68543	1	-1.16266	8.89641e-05	0.767049	-1.64774	NA
ENSG00000100263	RHBDD3	15.6983	15.6005	16.3226	10.8795	11.8131	11.5022	42.1783	19.133	19.158	10.2802	10.4343	10.8337	RHBDD3	-0.478925	0.0819501	1	0.756541	0.00598047	1	-0.116538	0.673028	1	-1.35201	1.20209e-06	0.0119247	-1.7871	NA
ENSG00000100266	PACSIN2	100.572	96.4817	99.4785	64.6913	66.37	63.2818	79.0328	112.149	111.767	67.9007	66.2955	65.8753	PACSIN2	-0.609811	3.41879e-05	0.317263	0.0313551	0.832344	1	0.0419254	0.775559	1	-0.599241	4.68e-05	0.415209	-19.1114	NA
ENSG00000100271	TTLL1	2.58035	2.13302	2.2657	1.83738	1.65437	1.87997	3.22608	2.80855	2.97033	2.1255	2.14606	1.69034	TTLL1	-0.383511	0.0211939	1	0.367425	0.023842	1	0.153191	0.36613	1	-0.597806	0.000195065	1	-1.62701	NA
ENSG00000100280	AP1B1	83.5184	84.9436	81.0911	98.8612	99.1233	101.418	99.4386	88.4866	84.4962	91.4144	88.2847	83.4931	AP1B1	0.262852	0.0203281	1	0.126183	0.265643	1	-0.186022	0.0999061	1	-0.0493537	0.662207	1	-0.391128	NA
ENSG00000100281	HMGXB4	24.6373	24.0248	24.4509	36.4897	36.153	34.2316	30.5213	24.8213	24.2124	38.6428	39.415	40.8982	HMGXB4	0.548272	1.28237e-05	0.121851	0.120274	0.339111	1	0.154614	0.213873	1	0.58261	3.5873e-06	0.0346138	4.84403	NA
ENSG00000100284	TOM1	46.1883	43.6243	44.8489	48.4402	47.8935	49.2576	121.036	61.7616	62.5488	63.0244	61.0096	59.0875	TOM1	0.112654	0.632621	1	0.865408	0.000258386	1	0.331062	0.159498	1	-0.421699	0.0730877	1	-0.487283	NA
ENSG00000100290	BIK	0.425249	0.528382	0.306662	0.941437	1.14985	1.24507	1.05677	0.418784	0.300384	1.64337	1.3708	1.55096	BIK	1.47615	0.000418543	1	0.491474	0.26568	1	0.463341	0.224454	1	1.44754	0.000448941	1	2.94531	NA
ENSG00000100292	HMOX1	38.5611	40.3195	40.7075	17.6611	18.2764	18.077	18.3636	24.5184	25.9924	20.5563	20.9215	20.4232	HMOX1	-1.14799	1.10447e-15	1.31487e-11	-0.794851	2.38758e-08	0.000315924	0.196915	0.167316	1	-0.156213	0.276981	1	0.196531	NA
ENSG00000100294	MCAT	16.9539	18.294	16.632	13.65	12.8221	14.07	28.8287	17.652	16.3369	11.8506	12.591	12.13	MCAT	-0.356394	0.0788748	1	0.27442	0.174309	1	-0.14904	0.46333	1	-0.779855	0.00012464	1	-2.84183	NA
ENSG00000100296	THOC5	48.4371	46.0694	48.389	39.9632	39.3983	38.6759	109.403	53.3301	53.4643	43.8084	44.5318	43.4489	THOC5	-0.275912	0.26957	1	0.597139	0.01704	1	0.159098	0.524173	1	-0.713957	0.00438048	1	-1.19563	NA
ENSG00000100297	MCM5	115.02	116.692	114.876	15.566	16.5583	15.2552	185.83	92.6434	91.4481	16.0519	15.988	15.503	MCM5	-2.87322	1.30784e-27	1.65938e-23	0.0936973	0.70282	1	0.0049653	0.985352	1	-2.96195	4.89493e-29	6.2616e-25	-31.6119	NA
ENSG00000100299	ARSA	20.2896	19.9177	20.7219	30.9762	32.8259	33.9636	54.5744	21.5732	22.3485	32.0721	30.3656	30.7652	ARSA	0.682974	0.0273949	1	0.692711	0.0253059	1	-0.0690119	0.823032	1	-0.0787578	0.797533	1	-0.113695	NA
ENSG00000100300	TSPO	1.11863	1.19698	1.33773	0.665762	0.645322	1.14631	3.65517	0.856346	1.02245	0.486281	0.426388	0.519543	TSPO	-0.590675	0.255527	1	0.600461	0.236532	1	-0.81799	0.121036	1	-2.00888	0.000166131	1	-3.34557	NA
ENSG00000100304	TTLL12	87.2289	88.172	86.5386	41.6724	43.4755	43.5717	84.6825	109.304	102.178	39.8687	39.7815	40.4522	TTLL12	-1.02551	2.70549e-16	3.23847e-12	0.177674	0.152012	1	-0.100034	0.422588	1	-1.30321	4.43008e-25	5.58767e-21	-7.33486	NA
ENSG00000100307	CBX7	4.07955	4.40625	4.13881	7.19926	7.87231	7.4812	5.22852	5.46758	5.20369	9.94964	9.71544	9.98352	CBX7	0.842054	4.47992e-12	5.10711e-08	0.336015	0.00805831	1	0.396003	0.000452877	1	0.902004	1.67189e-14	1.97367e-10	2.68442	NA
ENSG00000100311	PDGFB	18.6593	19.0581	19.5018	16.0622	15.9584	16.7084	15.4076	10.2134	9.82153	22.8567	21.739	21.7055	PDGFB	-0.232171	0.1717	1	-0.696495	5.32346e-05	0.67986	0.444989	0.00853857	1	0.909323	1.22669e-07	0.00126803	-1.30557	NA
ENSG00000100316	RPL3	1464.3	1441.57	1460.82	832.363	845.507	850.035	2890.39	1248.38	1218.03	776.496	775.519	778.377	RPL3	-0.788617	0.00694453	1	0.294819	0.310324	1	-0.117374	0.686098	1	-1.20081	4.53352e-05	0.402713	-4.07304	NA
ENSG00000100319	ZMAT5	4.52931	4.0624	4.53405	2.78846	3.09977	3.3614	13.8819	4.57562	4.51521	2.88312	2.69579	2.93084	ZMAT5	-0.509206	0.187255	1	0.808136	0.0357013	1	-0.121453	0.758285	1	-1.43883	0.000233701	1	-1.78042	NA
ENSG00000100320	RBFOX2	63.1667	63.3575	62.0678	83.3269	81.1785	79.8738	52.4051	67.3321	68.9298	70.4766	68.8609	70.5306	RBFOX2	0.374026	0.00384584	1	0.00132749	0.995054	1	-0.219727	0.088652	1	0.152972	0.236049	1	115.235	NA
ENSG00000100324	TAB1	27.1672	29.8894	28.3862	26.5516	27.7397	28.5599	33.5011	28.3554	29.4683	28.2703	26.6021	26.7371	TAB1	-0.0444622	0.707185	1	0.0950783	0.419728	1	-0.0217744	0.854265	1	-0.161316	0.169885	1	-1.69666	NA
ENSG00000100325	ASCC2	53.1408	53.1184	52.4445	39.5773	41.0346	40.891	92.9068	60.0787	59.0225	43.2023	42.7557	41.1073	ASCC2	-0.385588	0.0273259	1	0.417301	0.0167861	1	0.064627	0.711632	1	-0.738264	2.48311e-05	0.225789	-1.76914	NA
ENSG00000100330	MTMR3	3.38617	3.06905	3.36551	6.3998	6.0042	5.53417	2.46324	4.07074	3.97786	5.72075	6.34657	5.74633	MTMR3	0.87483	4.99886e-06	0.0485589	0.108777	0.60685	1	-0.0102385	0.960975	1	0.755799	6.83892e-05	0.596901	6.94814	NA
ENSG00000100335	MIEF1	69.2572	70.0052	70.4711	42.4443	41.321	39.5507	75.6238	90.5734	95.0752	39.1938	37.4134	36.9816	MIEF1	-0.766622	5.45682e-10	5.99486e-06	0.317582	0.00970982	1	-0.118634	0.336366	1	-1.20284	4.0511e-22	5.04646e-18	-3.78748	NA
ENSG00000100336	APOL4	2.01815	2.41956	2.52347	0.638194	0.563507	0.610173	2.22486	1.51269	1.64375	0.320983	0.370006	0.421976	APOL4	-1.99726	6.71358e-19	8.19124e-15	-0.392144	0.0638624	1	-0.751458	0.00558212	1	-2.35602	1.18222e-21	1.47033e-17	6.00805	NA
ENSG00000100342	APOL1	292.469	284.167	285.827	116.697	110.727	111.407	337.443	196.581	192.302	72.4739	74.3018	75.7017	APOL1	-1.34812	5.07009e-11	5.68408e-07	-0.248061	0.219173	1	-0.607112	0.00274071	1	-1.70717	1.82129e-16	2.19465e-12	6.88205	NA
ENSG00000100344	PNPLA3	15.0237	14.8364	16.0649	1.29981	1.0953	1.35794	13.7866	9.10271	8.91475	0.885754	0.792876	0.784367	PNPLA3	-3.64565	6.86549e-60	9.09747e-56	-0.534905	0.00621744	1	-0.625551	0.00921342	1	-3.73609	6.34195e-59	8.40372e-55	6.9846	NA
ENSG00000100345	MYH9	947.488	951.943	920.417	589.066	586.29	578.989	478.639	911.103	916.933	623.911	606.991	601.112	MYH9	-0.684711	0.00176724	1	-0.289764	0.184064	1	0.062501	0.774362	1	-0.332446	0.127678	1	1.1473	NA
ENSG00000100347	SAMM50	53.2908	52.7554	52.5648	36.8343	35.4849	36.9123	149.309	47.9953	48.4266	32.9537	32.7478	33.5947	SAMM50	-0.538471	0.150335	1	0.63153	0.0917572	1	-0.137696	0.712642	1	-1.3077	0.000564273	1	-2.07068	NA
ENSG00000100348	TXN2	52.766	52.0677	51.3447	58.4197	58.3249	59.5147	159.44	47.6755	46.9321	51.0953	51.7487	52.2857	TXN2	0.174599	0.662054	1	0.701911	0.0800004	1	-0.184324	0.644381	1	-0.711639	0.0758919	1	-1.01386	NA
ENSG00000100350	FOXRED2	106.419	107.389	109.188	36.214	37.1212	33.893	98.5566	116.894	116.015	35.6398	34.5661	34.5982	FOXRED2	-1.59161	1.28761e-40	1.67904e-36	0.037684	0.747323	1	-0.0330401	0.779919	1	-1.66234	5.73262e-44	7.52292e-40	-44.1125	NA
ENSG00000100353	EIF3D	147.009	149.167	147.715	109.24	107.864	109.164	208.476	155.181	155.342	117.201	117.012	116.457	EIF3D	-0.444256	0.0010861	1	0.225265	0.0968584	1	0.104083	0.443351	1	-0.565438	3.23582e-05	0.291224	-2.5101	NA
ENSG00000100354	TNRC6B	31.2151	33.3279	31.9262	61.1902	59.8112	58.5412	24.2994	31.0313	32.0879	58.4373	58.0354	58.8087	TNRC6B	0.896838	1.16973e-11	1.32507e-07	-0.140723	0.286269	1	-0.0346744	0.791074	1	1.00289	3.7382e-14	4.39426e-10	-7.1267	NA
ENSG00000100364	KIAA0930	62.6982	61.7719	62.4287	52.4099	51.6842	52.8271	87.7577	59.2709	56.4701	42.7339	42.7416	42.1108	KIAA0930	-0.252353	0.129907	1	0.12208	0.462697	1	-0.298755	0.0731541	1	-0.673187	5.67713e-05	0.499115	-5.51429	NA
ENSG00000100372	SLC25A17	17.5536	17.9119	17.3365	17.0133	18.4537	17.8794	18.6496	17.7193	16.891	17.2641	17.2848	16.855	SLC25A17	0.0149307	0.894162	1	0.0114688	0.916462	1	-0.053618	0.620863	1	-0.0501556	0.643361	1	-4.37322	NA
ENSG00000100373	UPK3A	4.77293	4.15791	4.68871	0.128196	0.168068	0.116363	13.7389	3.48172	4.06182	0.128134	0.130379	0.0874619	UPK3A	-5.38518	1.94539e-17	2.35295e-13	0.644757	0.197583	1	-0.335386	0.674558	1	-6.36416	1.23024e-21	1.52968e-17	-9.87063	NA
ENSG00000100376	FAM118A	22.2386	21.3886	21.6842	13.8292	14.1312	14.3381	32.1184	21.0347	22.4492	17.4019	17.6654	17.078	FAM118A	-0.627812	0.000119123	1	0.209412	0.195508	1	0.302516	0.063175	1	-0.534715	0.000983496	1	-2.55341	NA
ENSG00000100379	KCTD17	3.51735	3.08816	3.52017	12.4646	12.7403	12.2218	5.157	2.89269	2.63449	9.23335	9.81411	9.14723	KCTD17	1.89502	2.50512e-16	2.99913e-12	0.0666622	0.761517	1	-0.409809	0.0625148	1	1.41855	7.95978e-10	8.7486e-06	21.2796	NA
ENSG00000100380	ST13	335.684	341.8	340.852	354.991	347.023	350.905	259.324	293.552	300.023	307.295	311.151	313.611	ST13	0.048184	0.66314	1	-0.255673	0.0209156	1	-0.175919	0.111641	1	0.127938	0.247408	1	-0.500397	NA
ENSG00000100387	RBX1	44.1644	43.1276	42.151	51.4313	50.7706	52.037	59.9857	31.2501	28.1921	45.0619	45.2083	46.8777	RBX1	0.253018	0.304528	1	-0.117237	0.636332	1	-0.169538	0.491058	1	0.200719	0.416776	1	-1.71208	NA
ENSG00000100393	EP300	104.02	105.345	104.703	175.83	173.207	164.823	37.2676	123.121	121.825	184.023	182.162	182.914	EP300	0.710458	0.0420982	1	-0.154082	0.657812	1	0.0957067	0.783216	1	0.960247	0.00620717	1	-6.23203	NA
ENSG00000100395	L3MBTL2	15.9794	17.0905	14.587	18.3365	17.6765	18.7965	16.0989	15.8849	15.1614	15.3907	15.1282	16.1302	L3MBTL2	0.202541	0.07809	1	-0.0156516	0.896673	1	-0.232942	0.0409561	1	-0.0147454	0.899444	1	0.942104	NA
ENSG00000100399	CHADL	3.85467	3.89047	3.76075	2.44386	2.78615	2.38789	8.04147	4.84489	3.97786	2.49742	2.6535	2.10849	CHADL	-0.600426	0.0174292	1	0.549191	0.0262416	1	-0.0705821	0.786275	1	-1.22022	1.20433e-06	0.0119445	-2.22186	NA
ENSG00000100401	RANGAP1	131.886	128.976	130.497	113.637	116.659	115.301	232.363	131.098	126.477	129.295	126.963	127.997	RANGAP1	-0.179442	0.396656	1	0.3239	0.1261	1	0.153013	0.469686	1	-0.350329	0.0980087	1	-1.0816	NA
ENSG00000100403	ZC3H7B	131.249	135.299	133.762	120.75	126.272	119.59	44.2284	135.676	136.736	103.839	104.297	104.4	ZC3H7B	-0.126889	0.702932	1	-0.338117	0.309786	1	-0.23029	0.488927	1	-0.0190606	0.954788	1	0.056373	NA
ENSG00000100410	PHF5A	29.3973	27.8645	28.5752	16.8341	17.6219	18.3027	40.4858	27.1101	28.7631	19.3441	19.4555	18.876	PHF5A	-0.703157	1.0508e-05	0.10033	0.165458	0.295368	1	0.128782	0.419561	1	-0.739835	3.41543e-06	0.033017	-4.47144	NA
ENSG00000100412	ACO2	82.244	80.3971	80.2147	72.7961	72.3561	69.9976	40.5335	81.7044	81.8094	74.9259	75.2039	73.7503	ACO2	-0.174823	0.445246	1	-0.250763	0.273347	1	0.0574066	0.802173	1	0.133347	0.559704	1	-0.531765	NA
ENSG00000100413	POLR3H	17.5723	17.7018	17.01	17.289	18.9991	18.1334	22.1301	15.1444	15.7324	12.3189	13.3521	12.576	POLR3H	0.0579775	0.714371	1	0.0172164	0.909253	1	-0.509876	0.00121172	1	-0.469107	0.00297306	1	-27.2477	NA
ENSG00000100416	TRMU	31.4774	32.3536	32.373	26.3449	25.7761	27.8826	59.2944	29.3147	27.6716	26.6173	27.8566	26.7371	TRMU	-0.266314	0.29742	1	0.272677	0.285229	1	0.0216376	0.933185	1	-0.517355	0.0430019	1	-1.89732	NA
ENSG00000100417	PMM1	22.6134	21.1785	22.5091	22.6095	23.4581	24.3413	70.4032	28.4228	28.2089	25.2811	26.3201	24.6603	PMM1	0.0868228	0.779547	1	0.93825	0.00257938	1	0.115343	0.709268	1	-0.736095	0.0175833	1	-0.78454	NA
ENSG00000100418	DESI1	23.7565	23.4326	24.2963	26.0416	27.8215	26.7398	81.4166	36.484	34.1533	29.5513	29.2098	28.1309	DESI1	0.173378	0.545829	1	1.0891	0.000167977	1	0.108506	0.70513	1	-0.807231	0.00501741	1	-0.741189	NA
ENSG00000100422	CERK	99.2037	101.601	99.3754	112.535	113.318	112.959	51.1178	93.2829	90.6925	109.336	108.639	108.846	CERK	0.174707	0.383446	1	-0.352194	0.0791853	1	-0.0519982	0.795316	1	0.474904	0.0179968	1	-1.34842	NA
ENSG00000100425	BRD1	42.7776	43.3377	43.7319	55.0426	52.9796	52.3756	13.8581	50.8731	52.44	56.8119	55.8224	57.2894	BRD1	0.305027	0.420769	1	-0.147762	0.696135	1	0.083277	0.825963	1	0.536066	0.157543	1	-3.62791	NA
ENSG00000100426	ZBED4	46.6006	48.1898	48.7842	31.183	30.0578	28.9831	18.5066	52.8926	51.9026	32.9537	31.2536	31.9918	ZBED4	-0.670751	0.0335489	1	-0.219118	0.485337	1	0.0926031	0.768737	1	-0.359029	0.254442	1	1.63852	NA
ENSG00000100439	ABHD4	37.5492	37.6833	35.5349	74.8637	75.4106	76.2196	70.7608	53.3638	52.0034	99.6105	98.7155	98.2953	ABHD4	1.03259	1.6011e-13	1.86112e-09	0.668725	1.64696e-06	0.0215175	0.389288	0.00479049	1	0.75315	5.96263e-08	0.000623154	1.12625	Dox.only
ENSG00000100441	KHNYN	145.248	145.786	143.333	261.289	258.39	254.372	41.6539	159.506	158.986	278.629	279.253	280.452	KHNYN	0.833644	0.0310979	1	-0.270218	0.482051	1	0.11511	0.764429	1	1.21897	0.00175404	1	-4.51107	NA
ENSG00000100442	FKBP3	54.3964	53.1757	50.8463	72.7823	74.0333	72.114	25.4198	43.0643	42.6669	61.2061	62.3487	60.1886	FKBP3	0.466975	0.0121452	1	-0.510399	0.0062389	1	-0.252891	0.173327	1	0.724488	0.000105839	0.905767	-1.41945	NA
ENSG00000100445	SDR39U1	6.25339	4.7883	4.96367	6.4825	6.82235	7.29778	3.72669	5.5349	5.52274	8.4895	8.84151	8.1855	SDR39U1	0.366282	0.044054	1	-0.10822	0.549581	1	0.309869	0.0821463	1	0.784365	1.43593e-05	0.13334	-7.24785	NA
ENSG00000100461	RBM23	1.15611	1.13967	1.35492	0.776032	0.877131	0.737153	2.77315	1.36123	1.84526	0.940853	1.11708	1.09101	RBM23	-0.631279	0.0227193	1	0.709754	0.00690834	1	0.410463	0.133576	1	-0.930821	0.000387381	1	-1.31147	NA
[truncated: 11,788 more rows]

## Sheet: Up-regulated after Dox(299)
Gene ID	Gene name	DMSO-1	DMSO-2	DMSO-3	A-485-1	A-485-2	A-485-3	DMSO_Dox-1	DMSO_Dox-2	DMSO_Dox-3	A-485_Dox-1	A-485_Dox-2	A-485_Dox-3	Gene name	A-485 _logFC	A-485 _P.Value	A-485 _adj.P.Val	Dox_logFC	Dox_P.Val	Dox_adj.P.Val	A-485 .effect.in.Dox_ logFC	A-485 .effect.in.Dox_ P.Value	A-485 .effect.in.Dox_ adj.P.Val	CBP/p300 activity_dependency	Gene group
[truncated: 299 more rows]

[truncated: 1 more sheets: CBPp300 activity-dependent(163)]
