# Supplementary material for: A conserved role of CBP/p300 in mitochondrial stress response and longevity
Source: Research Square preprint supplement (doi:10.21203/rs.3.rs-86465/v1), 2020-10-14
Supplement: Supplementary file 7 [file 9cd4935061c306fb2bfcab4b.xlsx]

## Sheet: Key notes
Supplementary Table 5. RNA-seq results for wild-type and CBPp300 KO MEFs treated with or without Dox
Gene ID	Ensembl Gene ID
Symbol	Gene name
X_1	Normalized counts for given Condition_X (see below), replicate 1 of 3
X_2	Normalized counts for given Condition_X (see below), replicate 2 of 3
X_3	Normalized counts for given Condition_X (see below), replicate 3 of 3
X_logFC	Log2 fold change for given Condition_X (see below) relatively to Condition_WT
X_P-value	P-value for the comparasion of Condition_X (see below) versus Condition_WT (Limma-Voom)
Adjust_P-value	Benjamini-Hochberg adjusted P-value
Dox.effect.in.KO_logFC	Log2 fold change for Condition_KO-Dox relatively to Condition_KO
KO.effect.in.Dox_logFC	Log2 fold change for Condition_KO-Dox relatively to Condition_WT-Dox
CBP_dependency	Fold change for the KO.effect.in.Dox_logFC relatively to WT-Dox_logFC
Treatment Conditions:
WT	Wild-type MEFs treaed with DMSO control
KO	CBP/p300 KO MEFs treaed with DMSO control
WT-Dox	Wild-type MEFs treaed with Dox (30 μg/ml) for 24 h
KO-Dox	CBP/p300 KO MEFs treaed with Dox (30 μg/ml) for 24 h

## Sheet: All genes
Gene ID	Gene name	WT_1	WT_2	WT_3	KO_1	KO_2	KO_3	WT-Dox_1	WT-Dox_2	WT-Dox_3	KO-Dox_1	KO-Dox_2	KO-Dox3	Gene name	KO_logFC	Dox_logFC	KO-Dox_logFC	KO_P.Value	KO_adj.P.Val	Dox_P.Value	Dox_adj.P.Val	Dox.effect.in.KO_ logFC	Dox.effect.in.KO_ P.Value	Dox.effect.in.KO_ adj.P.Val	KO.effect.in.Dox_ logFC	KO.effect.in.Dox_ P.Value	KO.effect.in.Dox_ adj.P.Val	CBP_dependency	Gene group
ENSMUSG00000000001	Gnai3	273.952	276.322	277.358	265.251	267.348	265.811	280.678	272.686	276.378	269.778	267.098	269.679	Gnai3	-0.0519026	0.00365988	-0.0372119	0.0149976	1	0.864479	1	0.0146784	0.491203	1	-0.040884	0.0545786	1	-11.1709	NA
ENSMUSG00000000028	Cdc45	54.6362	55.4432	56.5141	16.8357	15.3261	15.7892	57.7749	61.3429	60.753	17.6294	16.4801	17.868	Cdc45	-1.79799	0.11071	-1.68113	0	0	0.000895623	1	0.115858	0.00988795	1	-1.79284	0	0	-16.1941	NA
ENSMUSG00000000031	H19	4.24793	4.11026	4.06904	0.0322478	0.0322478	0.0322478	7.83168	7.38159	8.05324	0.0322478	0.0322478	0.0322478	H19	-10.9762	0.909439	-7.00488	2.20598e-212	2.36878e-208	8.60381e-37	1.06051e-32	0	1	1	-11.9221	0	0	-13.1093	CBP.dependent
ENSMUSG00000000037	Scml2	1.59855	1.61352	1.94266	0.785117	0.822717	0.904293	1.55531	1.70406	1.36067	0.863609	0.578487	0.861467	Scml2	-1.06181	-0.16045	-1.18045	9.50574e-12	3.98766e-08	0.260687	1	-0.133114	0.484323	1	-1.0345	1.5027e-10	5.89658e-07	6.4475	NA
ENSMUSG00000000049	Apoh	0.198876	0.148762	0.248208	0.817154	0.650876	1.06968	0.366988	0.164668	0.166772	1.21771	1.3675	1.34392	Apoh	2.28827	0.26537	2.7505	1.83159e-17	9.16892e-14	0.551709	1	0.637457	0.000206903	1	2.66054	7.45692e-30	4.66878e-26	10.0258	NA
ENSMUSG00000000056	Narf	16.5284	16.3609	15.8139	27.1836	25.8256	27.2461	15.0621	15.8896	14.6785	27.421	27.6628	26.3713	Narf	0.722675	-0.0939569	0.741932	3.13245e-70	2.61967e-66	0.0391588	1	0.0203251	0.580641	1	0.83696	1.20211e-93	1.08418e-89	-8.90791	NA
ENSMUSG00000000058	Cav2	73.4318	73.8525	75.2362	53.6462	56.2071	55.2869	85.893	84.3344	82.6299	59.5361	59.4813	62.4498	Cav2	-0.43072	0.184466	-0.294527	2.95097e-49	2.21441e-45	5.40356e-11	5.9142e-07	0.136437	4.12453e-06	0.0487561	-0.478749	8.13496e-64	6.61128e-60	-2.59533	NA
ENSMUSG00000000078	Klf6	55.586	56.9579	58.1587	14.513	15.223	14.842	56.0175	52.5866	52.3789	14.9506	15.6304	16.0739	Klf6	-1.93985	-0.0846558	-1.87178	0	0	0.0111436	1	0.0666606	0.153284	1	-1.78854	0	0	21.1272	NA
ENSMUSG00000000085	Scmh1	42.6057	45.1234	44.2708	56.6256	54.6605	56.2341	41.7073	44.8069	43.1135	53.1932	55.4603	55.3638	Scmh1	0.344368	-0.0260948	0.313454	5.45232e-26	3.24195e-22	0.441652	1	-0.0307853	0.334547	1	0.339678	2.22838e-25	1.30294e-21	-13.0171	NA
ENSMUSG00000000088	Cox5a	41.7559	43.0927	41.1643	38.4126	36.6859	38.5075	42.7785	47.3064	46.4598	42.7858	44.5204	40.7092	Cox5a	-0.149082	0.11594	0.0220449	0.00023071	0.560857	0.00382759	1	0.171799	1.85928e-05	0.216903	-0.0932234	0.0190891	1	-0.804068	NA
ENSMUSG00000000093	Tbx2	1.5319	1.18075	1.36123	3.81261	3.82994	4.03163	0.68499	0.843323	0.80576	4.25063	4.15939	3.75619	Tbx2	1.54142	-0.827767	1.58446	8.40658e-46	6.18136e-42	1.58073e-07	0.00158389	0.0582758	0.495728	1	2.42758	2.88941e-88	2.57158e-84	-2.93268	NA
ENSMUSG00000000126	Wnt9a	0.815399	1.13081	1.12866	1.21762	0.805533	1.09975	1.35447	0.876428	1.27659	1.09454	1.07921	1.08762	Wnt9a	0.0294049	0.1941	0.101306	0.89673	1	0.292665	1	0.0578772	0.741967	1	-0.106835	0.546933	1	-0.550414	NA
ENSMUSG00000000127	Fer	68.9329	73.1035	70.9336	36.8428	37.9232	38.8383	70.9636	72.9132	73.7177	40.1531	38.7849	42.3073	Fer	-0.906849	0.0309981	-0.813229	6.13621e-156	6.23807e-152	0.340519	1	0.0937383	0.00892141	1	-0.84411	8.02349e-139	7.96411e-135	-27.231	NA
ENSMUSG00000000131	Xpo6	112.823	109.772	111.933	111.521	108.069	109.233	112.89	110.835	109.266	107.139	110.494	108.449	Xpo6	-0.024697	-0.00663648	-0.0369114	0.32391	1	0.793379	1	-0.0121737	0.628138	1	-0.0302342	0.226559	1	4.55576	NA
ENSMUSG00000000134	Tfe3	39.4897	38.4654	38.3901	40.8634	42.1849	41.1387	42.0254	41.2481	41.4656	39.8298	39.1035	38.2366	Tfe3	0.0936637	0.100567	0.0101099	0.001631	1	0.000790908	1	-0.0835806	0.00432556	1	-0.0904837	0.00218854	1	-0.899738	NA
ENSMUSG00000000148	Brat1	46.2881	46.172	45.2344	55.1199	51.8423	52.2948	48.2013	47.0912	47.3174	53.8552	51.8187	53.3887	Brat1	0.210185	0.050625	0.208005	5.74307e-12	2.43391e-08	0.104349	1	-0.00196449	0.953603	1	0.157595	1.84122e-07	0.000603	3.11299	NA
ENSMUSG00000000149	Gna12	160.145	159.241	153.464	146.505	138.794	138.041	155.569	153.475	155.357	145.197	148.928	142.628	Gna12	-0.159606	-0.0260208	-0.114535	9.39121e-09	3.41089e-05	0.348779	1	0.0450171	0.105523	1	-0.0885684	0.00139644	1	3.40376	NA
ENSMUSG00000000167	Pih1d2	1.29862	1.11417	1.11205	1.61808	1.18358	1.79137	1.42142	1.24058	1.25978	1.51022	1.18542	1.25346	Pih1d2	0.399702	0.157734	0.15997	0.0125242	1	0.365265	1	-0.232433	0.138909	1	0.00954468	0.969256	1	0.0605113	NA
ENSMUSG00000000168	Dlat	69.0828	71.0395	69.2724	100.805	101.539	100.588	74.0767	74.7009	75.9037	99.3029	100.616	98.6339	Dlat	0.532837	0.101677	0.511827	1.50584e-105	1.40103e-101	6.47309e-05	0.566589	-0.020893	0.370316	1	0.410268	1.17525e-64	9.59235e-61	4.03502	NA
ENSMUSG00000000171	Sdhd	81.8632	81.3095	79.8378	67.5022	69.4217	71.3896	73.8089	77.2665	74.9116	72.53	71.6199	70.7571	Sdhd	-0.222002	-0.104754	-0.177299	2.22121e-15	1.05174e-11	0.000175652	1	0.0445851	0.112022	1	-0.0726631	0.00959844	1	0.693657	NA
ENSMUSG00000000184	Ccnd2	830.755	813.82	847.41	737.14	719.153	722.748	852.999	819.351	827.522	742.407	748.85	781.277	Ccnd2	-0.193602	0.00455597	-0.133157	2.20968e-13	9.88388e-10	0.862996	1	0.0606123	0.0216317	1	-0.137546	1.81312e-07	0.000594704	-30.1903	NA
ENSMUSG00000000194	Gpr107	100.775	102.149	101.085	189.755	187.666	187.372	97.5754	93.6535	95.561	184.625	188.014	190.541	Gpr107	0.893797	-0.0841869	0.889387	6.16132e-306	6.96045e-302	0.00089034	1	-0.00408069	0.858689	1	0.973904	0	0	-11.5683	NA
ENSMUSG00000000223	Drp2	2.515	2.41247	2.77328	0.592895	0.410298	0.453235	2.07416	1.73716	2.28552	0.524906	0.50262	0.529779	Drp2	-2.47528	-0.342306	-2.30384	2.74015e-53	2.10991e-49	0.0049741	1	0.0998602	0.721191	1	-2.03324	2.68619e-35	1.79277e-31	5.93982	NA
ENSMUSG00000000253	Gmpr	4.54786	4.69283	4.83321	7.59298	7.38705	7.6852	3.73112	4.2697	4.35383	8.11492	8.33205	7.1183	Gmpr	0.691778	-0.189248	0.740718	2.15945e-20	1.15638e-16	0.0251335	1	0.05527	0.414577	1	0.936305	2.21164e-35	1.47826e-31	-4.94752	NA
ENSMUSG00000000266	Mid2	2.34837	2.34589	2.30813	10.9408	11.0301	10.5118	2.87754	2.64755	2.5882	10.7938	10.7901	11.2192	Mid2	2.22725	0.215019	2.22771	2.06637e-215	2.2259e-211	0.0308437	1	0.0156083	0.772643	1	2.02786	3.29664e-195	3.48884e-191	9.43109	NA
ENSMUSG00000000275	Trim25	3.39813	3.74407	3.90292	7.22456	6.81997	6.34706	3.27922	3.78968	3.17674	5.79019	6.01053	5.41463	Trim25	0.888613	-0.108823	0.641356	1.32548e-27	8.09071e-24	0.24763	1	-0.244285	0.00100923	1	0.753164	4.93379e-19	2.5483e-15	-6.92102	NA
ENSMUSG00000000276	Dgke	6.21414	6.34068	5.86317	18.5016	19.2097	17.0822	6.24167	6.07393	5.69907	16.5517	17.8154	16.9332	Dgke	1.57587	-0.0319351	1.47796	2.19442e-162	2.24863e-158	0.669307	1	-0.093327	0.0640132	1	1.51449	3.25756e-147	3.27092e-143	-47.424	NA
ENSMUSG00000000278	Scpep1	168.793	168.496	167.185	132.313	132.023	132.899	209.194	216.871	217.07	140.471	139.429	138.225	Scpep1	-0.34479	0.350407	-0.270863	2.07675e-49	1.55984e-45	8.00501e-54	9.98465e-50	0.0738725	0.00167158	1	-0.621325	3.00324e-163	3.08073e-159	-1.77315	NA
ENSMUSG00000000282	Mnt	27.8758	25.499	25.7315	25.3895	23.7463	24.9607	30.7781	30.3731	29.8461	25.7736	27.238	27.0949	Mnt	-0.093592	0.202297	0.018851	0.0213408	1	3.97735e-07	0.00392723	0.111916	0.00532502	1	-0.183974	2.96253e-06	0.00867133	-0.909425	NA
ENSMUSG00000000290	Itgb2	3.78137	3.77736	3.62051	0.208451	0.238457	0.302883	4.68513	4.8656	4.72377	0.247786	0.214327	0.122708	Itgb2	-4.06303	0.355329	-4.31804	6.65199e-148	6.68725e-144	4.68407e-06	0.0441145	-0.428562	0.242424	1	-4.84715	8.33588e-217	9.00192e-213	-13.6413	NA
ENSMUSG00000000295	Hddc2	8.49694	8.63768	8.93645	5.97511	6.54502	5.65544	10.4761	10.3279	10.8614	6.83709	5.84362	5.74632	Hddc2	-0.525999	0.28122	-0.504801	2.13596e-14	9.87454e-11	9.02761e-06	0.0836137	0.0225784	0.780188	1	-0.784648	4.15277e-33	2.71176e-29	-2.79016	NA
ENSMUSG00000000301	Pemt	2.18175	1.92977	1.84299	1.28169	1.35542	1.32528	2.32522	2.77997	2.50412	1.51022	1.51923	1.47961	Pemt	-0.599463	0.359191	-0.397546	2.32943e-06	0.00708845	0.00111528	1	0.191189	0.147324	1	-0.767506	2.67699e-11	1.08043e-07	-2.13676	NA
ENSMUSG00000000325	Arvcf	7.16392	6.12429	6.51105	19.2064	18.299	17.4581	5.10356	5.29596	5.39639	17.3215	17.694	18.2751	Arvcf	1.47658	-0.327552	1.4311	3.47622e-155	3.53045e-151	4.54897e-06	0.0428695	-0.0438101	0.364661	1	1.76034	2.07315e-207	2.2193e-203	-5.37422	NA
ENSMUSG00000000326	Comt	26.826	24.8831	23.6051	36.0739	36.8578	34.884	25.5896	26.8143	27.4079	36.4428	36.1447	35.4323	Comt	0.517433	0.08381	0.522195	1.18633e-36	8.06939e-33	0.0500986	1	0.0033885	0.94179	1	0.437012	3.66288e-27	2.20799e-23	5.21432	NA
ENSMUSG00000000339	Rtca	34.4409	33.2222	32.8582	28.2729	27.6471	27.3513	33.9246	38.2025	36.8918	26.9745	26.9345	26.3109	Rtca	-0.272014	0.117293	-0.32527	1.43918e-11	5.98124e-08	0.00285206	1	-0.0538218	0.189973	1	-0.44313	8.32945e-29	5.14094e-25	-3.77796	NA
ENSMUSG00000000340	Dbt	19.3611	19.1739	18.256	24.3163	25.7225	23.2918	20.0162	18.058	18.916	21.3397	22.4584	22.783	Dbt	0.367859	0.00495306	0.229361	3.09049e-15	1.45747e-11	0.924576	1	-0.137884	0.00227888	1	0.225023	1.74157e-06	0.00523864	45.4312	NA
ENSMUSG00000000346	Dazap2	105.841	106.876	106.833	160.698	166.89	165.27	96.4708	99.48	97.9825	156.605	155.194	154.749	Dazap2	0.625179	-0.120559	0.545984	8.73661e-152	8.83009e-148	1.34323e-06	0.0129756	-0.0790802	0.000599288	1	0.666658	9.44667e-170	9.76408e-166	-5.52971	NA
ENSMUSG00000000355	Mcts1	21.3106	19.8397	21.4621	20.6641	21.0484	20.3299	20.7694	21.4016	21.0852	19.9695	20.5162	20.4612	Mcts1	-0.0140159	0.0148242	-0.0381014	0.736243	1	0.714585	1	-0.0248511	0.521276	1	-0.0536912	0.171404	1	-3.62187	NA
ENSMUSG00000000374	Trappc10	52.1534	50.7161	51.5138	68.6555	65.8474	65.6011	52.2516	50.9148	52.4293	66.3564	64.534	67.5457	Trappc10	0.374402	0.011236	0.361998	1.49236e-37	1.02645e-33	0.713408	1	-0.0120363	0.671521	1	0.35113	1.5682e-33	1.02811e-29	31.2506	NA
ENSMUSG00000000378	Ccm2	60.0683	60.9527	60.3183	61.271	63.8025	63.6916	64.2688	67.666	66.7393	70.8211	68.9342	65.3898	Ccm2	0.0578901	0.131809	0.177192	0.0720339	1	4.05723e-05	0.360079	0.120024	0.000142866	1	0.0461055	0.143723	1	0.349791	NA
ENSMUSG00000000384	Tbrg4	63.2009	66.562	65.302	41.1998	39.6416	39.5299	69.7251	73.9063	71.4308	40.2917	39.4222	38.6738	Tbrg4	-0.696908	0.140917	-0.720308	3.79704e-105	3.52935e-101	3.54888e-06	0.0336114	-0.0240693	0.477895	1	-0.861894	1.12975e-164	1.16161e-160	-6.11634	NA
ENSMUSG00000000392	Fap	2.93157	3.42781	3.2052	0.320581	0.221273	0.468271	3.68091	3.50829	3.14311	0.263181	0.335714	0.258398	Fap	-3.34072	0.112575	-3.48742	1.72146e-90	1.53675e-86	0.287391	1	-0.286415	0.397455	1	-3.73988	7.77538e-110	7.29097e-106	-33.2212	NA
ENSMUSG00000000399	Ndufa9	58.2853	61.4188	58.9727	62.7767	66.3285	66.2927	60.0511	62.1871	64.8055	65.4634	65.7782	64.651	Ndufa9	0.129095	0.0660193	0.133037	7.4631e-05	0.193966	0.0444626	1	0.00366427	0.912064	1	0.0667397	0.0391793	1	1.01091	NA
ENSMUSG00000000409	Lck	1.78184	0.964364	1.0456	1.21762	1.2695	1.37039	2.25827	2.08477	2.21826	1.01756	1.30681	1.01223	Lck	0.0269885	0.806003	-0.13888	0.916149	1	2.29947e-06	0.0219875	-0.215929	0.240475	1	-0.994982	5.95791e-09	2.16141e-05	-1.23446	CBP.dependent
ENSMUSG00000000420	Galnt1	125.386	126.284	129.043	171.574	168.093	169.42	133.911	133.33	132.807	186.473	186.163	190.391	Galnt1	0.419356	0.0714807	0.564528	1.96635e-74	1.67199e-70	0.00233059	1	0.145265	6.44095e-11	7.92495e-07	0.49314	6.224e-105	5.77463e-101	6.89892	NA
ENSMUSG00000000439	Mkrn2	23.1602	23.9177	24.851	19.6869	21.1687	20.1344	26.1754	27.2281	27.0716	20.3698	20.9259	18.9686	Mkrn2	-0.2393	0.162165	-0.2559	3.88661e-08	0.000135759	0.000118384	1	-0.0164985	0.707052	1	-0.417964	8.15003e-23	4.56809e-19	-2.57741	NA
ENSMUSG00000000441	Raf1	45.2217	45.6893	42.6096	48.9207	47.7525	48.5511	45.6238	45.6842	46.628	48.6361	48.0406	47.3429	Raf1	0.121603	0.0469587	0.109793	7.27767e-05	0.189511	0.130494	1	-0.0123699	0.687394	1	0.0622749	0.0402807	1	1.32616	NA
ENSMUSG00000000486	Sept1	1.73185	1.89648	2.02573	1.26567	1.1664	1.32528	1.73942	1.72061	1.54564	1.04836	1.3675	1.17808	Sept1	-0.59781	-0.178567	-0.659325	4.86943e-06	0.0144135	0.167758	1	-0.0687923	0.689359	1	-0.488044	0.000331546	0.742662	2.73311	NA
ENSMUSG00000000531	Grasp	21.2106	20.4223	20.4488	14.1766	14.4153	14.1955	18.5601	20.2098	19.8409	14.6734	14.3559	15.0939	Grasp	-0.53829	-0.083008	-0.492713	8.41056e-36	5.6704e-32	0.0447058	1	0.0448867	0.329063	1	-0.410397	1.27679e-21	6.99679e-18	4.94407	NA
ENSMUSG00000000532	Acvr1b	28.409	28.6615	26.3794	32.1974	30.9636	31.9371	25.9913	23.9176	24.0952	27.8674	29.3319	29.1906	Acvr1b	0.189189	-0.173532	0.0505608	2.61147e-06	0.00791537	3.13907e-05	0.280916	-0.139028	0.000459013	1	0.223694	5.10051e-08	0.000174285	-1.28906	NA
ENSMUSG00000000538	Tom1l2	55.5193	53.1296	55.6337	118.217	118.774	117.773	49.4398	49.872	49.0662	111.25	111.981	115.279	Tom1l2	1.11102	-0.146957	1.04317	0	0	4.97023e-07	0.00489021	-0.0675463	0.00566469	1	1.19043	0	0	-8.10053	NA
ENSMUSG00000000552	Zfp385a	52.0701	50.7993	50.4838	49.8658	50.691	50.8515	44.2681	48.3823	47.9396	47.2351	47.6309	46.1971	Zfp385a	-0.0183827	-0.125379	-0.120509	0.573128	1	0.000133521	1	-0.102237	0.00161752	1	0.00475903	0.887389	1	-0.0379573	NA
ENSMUSG00000000555	Itga5	229.462	237.489	229	136.894	130.803	134.117	252.51	259.444	259.327	145.751	146.5	144.392	Itga5	-0.792383	0.148295	-0.672354	5.92558e-217	6.38955e-213	1.37111e-09	1.45845e-05	0.119735	3.09536e-06	0.0366615	-0.820943	5.83553e-238	6.38174e-234	-5.53589	NA
ENSMUSG00000000561	Wdr77	45.6716	45.6893	46.6298	23.6595	23.6776	24.7502	50.9462	55.4337	53.3373	23.141	24.1426	23.959	Wdr77	-0.936793	0.211157	-0.953935	1.02065e-147	1.02554e-143	2.39452e-10	2.58944e-06	-0.0177418	0.664567	1	-1.16569	1.49944e-239	1.64129e-235	-5.5205	NA
ENSMUSG00000000563	Atp5f1	220.697	226.636	216.906	170.405	175.619	175.328	226.032	237.197	232.153	183.363	176.118	176.098	Atp5f1	-0.349513	0.0661306	-0.310631	2.66792e-38	1.84674e-34	0.0134563	1	0.0388261	0.152782	1	-0.376817	1.21297e-44	8.80128e-41	-5.69808	NA
ENSMUSG00000000567	Sox9	151.164	149.47	146.868	7.83326	7.14647	8.00094	139.953	137.518	139.281	9.62369	9.94042	9.21396	Sox9	-4.28566	-0.102737	-3.95945	0	0	2.40801e-05	0.217299	0.322439	2.8557e-09	3.49224e-05	-3.8605	0	0	37.5764	NA
ENSMUSG00000000568	Hnrnpd	170.542	172.823	175.01	90.729	93.067	93.3111	175.787	185.884	185.104	95.7311	92.468	96.8247	Hnrnpd	-0.903763	0.0769725	-0.86311	3.37e-232	3.66993e-228	0.00412315	1	0.0406399	0.156725	1	-0.940096	6.40466e-255	7.07203e-251	-12.2134	NA
ENSMUSG00000000579	Dynlt1c	2.2484	2.4957	2.37458	1.66613	1.54445	2.2725	2.35869	2.53168	2.65546	1.77195	2.29307	1.79622	Dynlt1c	-0.374072	0.0850544	-0.289478	0.00555747	1	0.520775	1	0.0899076	0.517327	1	-0.369233	0.00519569	1	-4.34114	NA
ENSMUSG00000000581	C1d	33.1579	35.5692	35.1839	31.9731	34.4864	34.3427	33.1547	35.554	35.0589	34.6569	34.1267	34.7388	C1d	-0.0439769	-0.00195447	-0.00476778	0.252025	1	0.963628	1	0.0385463	0.31096	1	-0.00347626	0.931995	1	1.77862	NA
ENSMUSG00000000594	Gm2a	25.3597	26.5643	26.7781	67.39	68.614	71.0589	22.0749	23.9838	22.7836	72.2683	72.8945	69.8826	Gm2a	1.39697	-0.193208	1.45034	0	0	1.2261e-06	0.0118687	0.0541867	0.077827	1	1.64437	0	0	-8.51089	NA
ENSMUSG00000000600	Krit1	30.8751	30.6756	31.1637	56.7217	57.3069	57.3016	34.5774	33.4684	31.9312	54.5018	53.9278	56.585	Krit1	0.886551	0.108971	0.831451	6.1547e-171	6.35472e-167	0.00170016	1	-0.0541406	0.0662268	1	0.72344	1.76743e-116	1.68083e-112	6.63884	NA
ENSMUSG00000000605	Clcn4	34.0576	33.7216	31.579	77.5938	78.4949	78.6366	33.2552	32.7567	34.4031	79.9661	83.0758	82.939	Clcn4	1.24107	0.0152084	1.30842	0	0	0.667051	1	0.0676523	0.0163911	1	1.29351	0	0	85.0525	NA
ENSMUSG00000000628	Hk2	85.9289	85.97	87.7951	42.4332	42.7691	43.6496	116.455	107.127	113.638	44.1406	43.1851	45.5488	Hk2	-1.01135	0.376925	-0.967021	1.35468e-207	1.4487e-203	1.70542e-34	2.09681e-30	0.0441573	0.204803	1	-1.34412	0	0	-3.566	NA
ENSMUSG00000000631	Myo18a	126.903	125.435	127.615	69.8409	64.0087	64.9245	95.182	90.0451	90.0624	66.1254	68.4183	68.5106	Myo18a	-0.934835	-0.465016	-0.904109	1.1322e-189	1.19062e-185	4.97865e-50	6.19991e-46	0.0306384	0.353276	1	-0.43918	3.7009e-42	2.63504e-38	0.94444	NA
ENSMUSG00000000690	Hoxb6	24.0933	23.6015	23.8377	28.9617	28.6266	27.637	22.1585	20.9381	21.7074	23.803	23.6874	24.2153	Hoxb6	0.252226	-0.142831	0.0034767	5.67664e-13	2.50283e-09	0.000121652	1	-0.248679	4.89565e-13	6.06718e-09	0.14638	6.28457e-05	0.157366	-1.02485	NA
ENSMUSG00000000693	Loxl3	175.525	174.455	170.458	76.4405	73.5459	74.7876	166.95	166.485	166.455	79.6889	81.1639	82.336	Loxl3	-1.21133	-0.0581181	-1.09766	0	0	0.0124957	1	0.11347	1.41772e-05	0.165788	-1.03974	0	0	17.8902	NA
ENSMUSG00000000706	Btn1a1	0.0489106	0.0488927	0.0488601	2.80345	3.03947	2.79874	0.0322478	0.0322478	0.0490633	2.6187	2.59654	2.76113	Btn1a1	7.25098	-1.29119	5.76462	1.55306e-143	1.55166e-139	0.62509	1	-0.114228	0.233005	1	8.44236	1.06773e-136	1.05705e-132	-6.53844	NA
ENSMUSG00000000708	Kat2b	23.0602	23.6181	23.5719	106.956	110.182	109.519	21.7066	20.0277	21.1525	110.388	108.081	109.384	Kat2b	2.21858	-0.160159	2.2225	0	0	2.98036e-05	0.267249	0.00532631	0.833296	1	2.38407	0	0	-14.8856	NA
ENSMUSG00000000711	Rab5b	75.3813	73.7527	75.3026	127.507	129.446	128.824	65.4906	64.2065	64.5869	121.011	116.973	122.968	Rab5b	0.781654	-0.20825	0.685256	3.82079e-204	4.07182e-200	4.00704e-14	4.57524e-10	-0.0959306	9.02584e-05	1	0.893974	2.25826e-258	2.49718e-254	-4.29279	NA
ENSMUSG00000000738	Spg7	55.1027	58.0731	54.8197	61.0788	57.9771	57.9932	44.7702	47.4719	48.36	60.3829	60.331	59.5551	Spg7	0.0757974	-0.256953	0.102192	0.0225779	1	4.34762e-14	4.96237e-10	0.0259675	0.42914	1	0.358719	1.07141e-26	6.40702e-23	-1.39605	NA
ENSMUSG00000000740	Rpl13	549.971	553.376	537.623	307.411	281.13	285.928	501.389	552.11	533.335	298.121	294.015	274.775	Rpl13	-0.908104	-0.0483936	-0.92139	1.07954e-124	1.04565e-120	0.200359	1	-0.0125779	0.74301	1	-0.872288	2.30495e-115	2.18555e-111	18.0249	NA
ENSMUSG00000000743	Chmp1a	58.5353	60.5033	59.0392	91.7862	91.8985	91.3865	56.1514	56.0792	56.0951	95.9005	95.5937	92.3469	Chmp1a	0.627485	-0.0812968	0.672508	4.28362e-130	4.19152e-126	0.00330101	1	0.0452999	0.0638159	1	0.754082	9.19243e-188	9.67227e-184	-9.27567	NA
ENSMUSG00000000751	Rpa1	144.948	145.908	146.653	48.6644	48.7836	47.1077	162.883	167.097	166.674	55.0714	55.5059	54.0672	Rpa1	-1.5989	0.18297	-1.41003	0	0	1.50984e-15	1.74779e-11	0.188412	2.96642e-11	3.65552e-07	-1.59346	0	0	-8.70889	NA
ENSMUSG00000000753	Serpinf1	553.287	570.121	561.744	56.4014	52.2204	55.5425	630.95	671.272	680.286	68.7119	70.9523	66.7165	Serpinf1	-3.35977	0.234459	-3.02985	0	0	4.97808e-14	5.6785e-10	0.329697	3.45456e-20	4.32338e-16	-3.26454	0	0	-13.9237	NA
ENSMUSG00000000759	Tubgcp3	65.617	66.2291	65.518	51.8201	52.8906	51.934	64.8881	64.6535	63.7461	49.8831	50.6049	52.3333	Tubgcp3	-0.333873	-0.0301006	-0.369289	1.45202e-35	9.77063e-32	0.252801	1	-0.0352055	0.19847	1	-0.338978	1.01135e-36	6.85291e-33	11.2615	NA
ENSMUSG00000000776	Polr3d	19.0445	18.8077	18.7045	17.0279	15.687	15.9245	20.8196	21.5837	22.5482	16.721	15.6152	16.104	Polr3d	-0.21759	0.199905	-0.224014	1.36048e-06	0.00422293	3.99931e-06	0.0377655	-0.00644527	0.899799	1	-0.423942	2.83546e-22	1.57424e-18	-2.12072	NA
ENSMUSG00000000787	Ddx3x	316.408	321.729	327.577	399.71	416.627	407.413	324.713	312.594	308.26	374.175	374.752	390.413	Ddx3x	0.341607	-0.0304212	0.238395	1.96298e-36	1.3311e-32	0.264816	1	-0.103043	0.000130282	1	0.268985	3.47647e-23	1.96281e-19	-8.84203	NA
ENSMUSG00000000792	Slc5a5	1.09867	0.864494	1.21172	0.240488	0.238457	0.287847	1.01973	0.926086	1.14207	0.23239	0.366061	0.303628	Slc5a5	-2.18293	-0.0420407	-1.82586	2.92439e-21	1.59672e-17	0.812016	1	0.258271	0.42456	1	-1.8829	7.0292e-18	3.52374e-14	44.7877	NA
ENSMUSG00000000804	Usp32	49.6873	47.8365	50.5669	127.075	123.431	127.14	49.6909	46.8594	44.1561	118.563	121.464	126.315	Usp32	1.35124	-0.0738024	1.3066	0	0	0.0514275	1	-0.0439629	0.190848	1	1.38108	0	0	-18.7132	NA
ENSMUSG00000000811	Txnrd3	19.6443	20.5721	19.7843	9.99576	9.72408	9.57964	23.1962	24.4638	22.7163	9.947	9.86455	9.13858	Txnrd3	-1.03674	0.230609	-1.05215	1.28747e-104	1.19581e-100	4.59263e-08	0.000468999	-0.0173026	0.76031	1	-1.28465	5.1872e-173	5.37913e-169	-5.5707	NA
ENSMUSG00000000823	Zfp512b	54.6695	54.095	56.3148	87.5093	87.2588	85.628	47.3812	46.0649	44.8792	74.6392	76.3236	78.401	Zfp512b	0.657626	-0.255231	0.474397	1.04668e-116	9.97904e-113	1.32128e-16	1.54128e-12	-0.182849	3.08839e-11	3.8049e-07	0.730009	6.7794e-136	6.7028e-132	-2.86019	NA
ENSMUSG00000000826	Dnajc5	155.713	153.715	155.424	312.297	308.762	312.961	163.837	155.51	156.265	297.69	300.57	304.883	Dnajc5	1.00688	0.0330075	0.95814	0	0	0.188769	1	-0.0485456	0.0390619	1	0.92533	0	0	28.0339	NA
ENSMUSG00000000827	Tpd52l2	88.2783	86.0366	87.9612	95.1661	96.0742	98.3328	88.186	90.1941	89.9783	96.6395	97.5814	95.3773	Tpd52l2	0.143164	0.0330974	0.142996	1.02279e-08	3.70863e-05	0.191208	1	-0.000167353	1	1	0.109899	9.40131e-06	0.0261826	3.32048	NA
ENSMUSG00000000838	Fmr1	177.641	178.2	183.399	75.175	73.4084	71.1942	218.634	200.831	203.718	71.6217	70.0115	75.2499	Fmr1	-1.29546	0.208747	-1.31452	0	0	1.95522e-10	2.1175e-06	-0.018869	0.593462	1	-1.52307	0	0	-7.29626	NA
ENSMUSG00000000869	Il4	1.31528	1.61352	1.1785	1.90641	2.0256	2.18229	1.5051	1.48887	1.20933	1.87972	1.89856	2.14299	Il4	0.5866	0.0347194	0.537506	1.00562e-05	0.0288511	0.868533	1	-0.0483921	0.726985	1	0.503506	0.000147281	0.349351	14.5021	NA
ENSMUSG00000000876	Pxmp4	20.5275	19.873	18.6048	33.8793	32.8711	31.8769	15.2462	14.5323	15.8556	30.9158	30.5306	29.9595	Pxmp4	0.741647	-0.37156	0.632523	1.60909e-74	1.36853e-70	5.5223e-16	6.41416e-12	-0.109447	0.00406293	1	1.00376	4.06786e-125	3.9324e-121	-2.70148	NA
ENSMUSG00000000881	Dlg3	56.3358	56.675	55.5506	53.6141	55.5197	53.7533	47.9	47.7698	47.4856	53.07	52.6078	52.7856	Dlg3	-0.0500482	-0.235811	-0.0890827	0.0602486	1	3.03655e-18	3.57887e-14	-0.0391387	0.134968	1	0.146625	5.6023e-08	0.000190758	-0.621788	NA
ENSMUSG00000000884	Gnb1l	5.76424	5.6083	5.06578	3.73252	2.97073	3.82114	5.42156	6.00772	6.10264	3.46546	3.24899	3.53004	Gnb1l	-0.642266	0.0935077	-0.680918	6.39488e-13	2.81402e-09	0.267851	1	-0.0447339	0.679568	1	-0.780516	1.11118e-18	5.68704e-15	-8.34707	NA
ENSMUSG00000000901	Mmp11	28.209	28.7448	27.9908	28.8976	28.1111	26.3139	29.4726	30.7538	30.5692	28.1754	27.7994	28.7986	Mmp11	-0.0290084	0.0962413	-0.00297332	0.451211	1	0.00966782	1	0.0261447	0.493323	1	-0.0991054	0.0069571	1	-1.02976	NA
ENSMUSG00000000902	Smarcb1	57.3189	60.0539	57.8099	42.4653	41.2397	41.4394	58.0092	58.4793	61.7283	43.7095	44.4597	40.2117	Smarcb1	-0.485494	0.0247339	-0.449508	6.41338e-40	4.50732e-36	0.491496	1	0.0366724	0.328541	1	-0.473556	1.20607e-38	8.32071e-35	-19.1461	NA
ENSMUSG00000000915	Hip1r	2.03178	2.06293	2.24169	27.4559	26.1349	25.8628	2.4089	2.20063	1.96603	26.4357	26.7221	26.5371	Hip1r	3.66727	0.05438	3.6541	0	0	0.621068	1	0.00456266	0.910262	1	3.61749	0	0	66.5223	NA
ENSMUSG00000000916	Nsun5	15.8286	16.9269	15.5648	8.87446	9.22574	7.91073	15.1625	16.7834	17.1	8.5306	8.80242	8.70135	Nsun5	-0.898744	0.0215744	-0.891375	1.88211e-50	1.4225e-46	0.707017	1	0.00429921	0.976312	1	-0.916023	1.42907e-53	1.10367e-49	-42.4589	NA
ENSMUSG00000000934	Top1mt	14.1123	15.7617	14.5514	12.2223	12.7657	12.722	19.3635	19.9946	19.7064	13.1031	13.6275	12.4404	Top1mt	-0.237068	0.411677	-0.181025	2.26376e-06	0.00689768	1.50821e-18	1.78089e-14	0.0549557	0.280265	1	-0.593793	1.23914e-36	8.38404e-33	-1.44237	NA
ENSMUSG00000000942	Hoxa4	5.28102	5.67488	5.61398	2.99567	2.42084	2.483	5.01987	5.29596	5.39639	3.49625	3.62832	3.27374	Hoxa4	-1.07672	-0.0771458	-0.672794	1.23285e-36	8.38215e-33	0.308762	1	0.399574	1.49605e-05	0.174873	-0.600017	8.46043e-14	3.75728e-10	7.7777	NA
ENSMUSG00000000948	Gm38393	1.38193	1.56358	1.57719	2.22678	2.14589	2.28754	1.60552	1.04195	1.00755	1.5872	1.64062	2.09776	Gm38393	0.568879	-0.314643	0.22689	0.00011677	0.296012	0.0524173	1	-0.327994	0.0205978	1	0.555574	0.000413364	0.910424	-1.76573	NA
ENSMUSG00000000957	Mmp14	165.71	167.048	161.404	114.532	112.296	109.474	191.604	187.109	188.786	121.75	120.114	126.058	Mmp14	-0.555552	0.199663	-0.425729	5.40671e-98	4.93362e-94	8.66608e-15	9.96512e-11	0.129915	1.25297e-06	0.0149505	-0.625301	1.40681e-127	1.36813e-123	-3.13178	NA
ENSMUSG00000000958	Slc7a7	2.26506	2.66215	2.07556	3.68447	3.29723	4.00156	2.37543	2.61445	2.63865	4.15826	4.34147	3.99742	Slc7a7	0.660559	0.12515	0.84253	1.56501e-10	6.20057e-07	0.265619	1	0.183335	0.0427879	1	0.71875	2.83312e-13	1.23581e-09	5.74313	NA
ENSMUSG00000000959	Oxa1l	30.2752	30.7089	29.9012	35.0807	33.8678	34.3127	27.9328	32.558	31.7631	33.3945	32.23	32.1155	Oxa1l	0.184518	0.0216838	0.104763	2.07678e-05	0.0573398	0.626408	1	-0.079589	0.0630281	1	0.0832459	0.0546583	1	3.83908	NA
ENSMUSG00000000976	Heatr6	48.1544	46.405	44.1047	37.4835	37.3733	36.4326	42.0588	39.8412	39.33	34.6877	36.3116	37.0456	Heatr6	-0.317818	-0.193965	-0.359575	1.54687e-17	7.75602e-14	1.73834e-07	0.00173764	-0.0422474	0.264212	1	-0.1661	1.05779e-05	0.0292902	0.856343	NA
ENSMUSG00000001016	Ilf2	143.415	145.576	142.915	108.942	109.753	106.948	137.041	143.278	138.726	95.2231	94.6682	97.2318	Ilf2	-0.407786	-0.043575	-0.589097	3.35924e-60	2.6884e-56	0.075929	1	-0.181385	1.16815e-12	1.44641e-08	-0.545596	7.94664e-105	7.37131e-101	12.5208	NA
ENSMUSG00000001017	Chtop	142.449	145.992	143.828	184.629	186.308	185.101	151.033	152.994	149.471	181.207	178.228	179.897	Chtop	0.363267	0.0692105	0.319285	3.50672e-60	2.80608e-56	0.00220607	1	-0.0439767	0.0431325	1	0.250079	1.09961e-29	6.87035e-26	3.61332	NA
ENSMUSG00000001018	Snapin	55.8859	56.0757	58.0923	96.5437	102.295	101.46	51.2642	54.6392	52.1771	100.442	101.178	100.865	Snapin	0.820633	-0.105311	0.831087	1.80933e-165	1.858e-161	0.000969851	1	0.0105691	0.713579	1	0.936515	8.3962e-214	9.04186e-210	-8.89283	NA
ENSMUSG00000001020	S100a4	4.26459	4.21013	4.06904	0.0482663	0.066616	0.0472831	2.74364	3.93865	3.39535	0.0322478	0.0777677	0.0322478	S100a4	-7.46956	-0.317952	-6.59499	7.51894e-150	7.5806e-146	0.00852583	1	-0.442722	1	1	-7.59659	1.28943e-132	1.26622e-128	23.8923	NA
ENSMUSG00000001025	S100a6	703.568	722.056	716.953	523.405	549.855	553.766	691.052	765.241	714.707	610.19	592.656	550.965	S100a6	-0.397126	0.0190205	-0.290089	7.83727e-26	4.64436e-22	0.61395	1	0.108246	0.00415564	1	-0.307901	3.3651e-16	1.6139e-12	-16.1879	NA
ENSMUSG00000001034	Mapk7	28.8755	28.2288	29.137	21.5131	20.3782	19.8337	26.2758	26.7315	27.6096	19.9695	19.0292	19.5415	Mapk7	-0.483668	-0.0974625	-0.559103	7.26206e-37	4.95055e-33	0.00835943	1	-0.0761146	0.0581999	1	-0.46232	3.70896e-33	2.42306e-29	4.74357	NA
ENSMUSG00000001036	Epn2	33.9077	34.171	33.2735	44.0351	42.2364	43.1384	34.9958	34.6933	35.3616	44.4485	45.2639	44.0713	Epn2	0.353302	0.0517165	0.400525	4.71527e-32	3.04418e-28	0.0993638	1	0.0475385	0.0922112	1	0.349125	1.73055e-32	1.12105e-28	6.75074	NA
ENSMUSG00000001039	B9d1	4.89778	4.37658	5.099	6.45567	5.96076	6.31699	5.80651	6.43809	6.00175	6.31364	6.0257	7.19368	B9d1	0.385475	0.346332	0.441396	1.71439e-06	0.00527173	1.9399e-05	0.176259	0.059745	0.432637	1	0.0988847	0.1988	1	0.28552	NA
ENSMUSG00000001052	Sec24b	122.254	119.326	120.887	150.142	142.746	145.739	115.752	110.703	116.025	148.415	156.575	153.769	Sec24b	0.275349	-0.0818986	0.339603	2.00632e-22	1.12575e-18	0.00437067	1	0.0646561	0.0199684	1	0.421904	1.62239e-50	1.23123e-46	-5.15155	NA
ENSMUSG00000001053	N4bp3	8.09703	9.91934	8.75371	9.5152	9.00235	8.73767	10.2251	9.51687	8.91083	8.8847	9.15141	9.18381	N4bp3	0.0255321	0.0984268	0.0289589	0.718832	1	0.157762	1	-0.00133296	0.990794	1	-0.0742285	0.280988	1	-0.754149	NA
ENSMUSG00000001054	Rmnd5b	15.7786	17.9588	16.5781	27.9044	27.8705	27.8776	14.878	17.0483	16.5787	27.6827	29.4836	26.2054	Rmnd5b	0.734436	-0.0528732	0.728941	1.068e-43	7.74408e-40	0.351003	1	-0.00490334	0.927037	1	0.782408	2.34975e-49	1.76842e-45	-14.7978	NA
ENSMUSG00000001056	Nhp2	52.5033	53.4292	51.9291	21.2247	21.7186	22.089	65.4906	71.8869	69.1271	22.4174	22.4281	22.1799	Nhp2	-1.28031	0.387785	-1.2358	1.63973e-262	1.81403e-258	1.63338e-31	2.00057e-27	0.0432794	0.296519	1	-1.62481	0	0	-4.18999	NA
ENSMUSG00000001062	Vps9d1	18.0614	17.576	16.7941	23.6916	24.3306	23.8331	14.2085	15.4096	15.5193	23.1564	24.5978	23.3107	Vps9d1	0.454979	-0.216438	0.438822	7.82202e-27	4.71981e-23	2.71087e-06	0.0258237	-0.0155228	0.700007	1	0.655896	3.56414e-52	2.73084e-48	-3.03042	NA
ENSMUSG00000001065	Zfp276	14.5455	14.1638	14.4185	16.7235	14.9996	16.12	12.3172	13.506	12.8961	14.8736	15.5545	14.7019	Zfp276	0.15142	-0.155741	0.0651275	0.00209031	1	0.0022542	1	-0.0858108	0.076606	1	0.221352	9.03713e-06	0.0252407	-1.42128	NA
ENSMUSG00000001082	Mfsd10	57.3189	59.8042	55.9825	43.09	41.7553	41.4243	54.4275	56.2116	56.7004	40.6766	40.545	40.9052	Mfsd10	-0.455524	-0.0488874	-0.502743	1.86381e-48	1.39078e-44	0.107696	1	-0.0480443	0.136314	1	-0.454681	3.78412e-48	2.8256e-44	9.30057	NA
ENSMUSG00000001089	Luzp1	85.9789	83.5565	87.4296	97.0403	93.9262	93.8223	89.9433	77.6307	79.704	99.0258	99.3871	104.861	Luzp1	0.14837	-0.0554991	0.238802	0.000304197	0.723686	0.180309	1	0.090785	0.0258016	1	0.294654	6.51354e-13	2.80213e-09	-5.30917	NA
ENSMUSG00000001098	Kctd10	153.813	152.4	148.148	106.94	103.188	100.784	128.271	127.272	126.266	104.599	102.983	108.147	Kctd10	-0.547645	-0.251031	-0.525267	1.18027e-88	1.04808e-84	2.36915e-20	2.82142e-16	0.0224087	0.425569	1	-0.274205	2.88298e-23	1.62946e-19	1.09232	NA
ENSMUSG00000001100	Poldip2	85.1624	88.8995	83.5091	49.5935	49.007	47.4986	83.2653	84.0199	85.724	48.9286	47.9799	46.951	Poldip2	-0.818839	-0.0258016	-0.840021	5.54691e-163	5.6867e-159	0.371963	1	-0.0219574	0.488476	1	-0.814995	2.42417e-162	2.48429e-158	31.587	NA
ENSMUSG00000001105	Ift20	23.5934	22.1034	23.5221	20.4719	20.361	20.1194	21.9075	23.7355	23.2713	21.1858	20.9562	21.1999	Ift20	-0.183994	-0.00628087	-0.127378	4.6859e-06	0.0138984	0.879885	1	0.0558021	0.167794	1	-0.121911	0.00212458	1	19.4099	NA
ENSMUSG00000001119	Col6a1	885.326	881.148	879.721	155.444	150.926	149.423	878.138	873.213	875.85	161.932	160.718	156.528	Col6a1	-2.53777	-0.0103935	-2.46543	0	0	0.635009	1	0.072229	0.0030097	1	-2.45515	0	0	236.22	NA
ENSMUSG00000001120	Pcbp3	41.9891	43.4089	40.5165	15.9546	16.6665	16.7815	39.5483	39.1791	38.7079	17.1367	16.6167	16.2849	Pcbp3	-1.35124	-0.100622	-1.33108	2.55453e-299	2.8787e-295	0.00230634	1	0.0181551	0.675989	1	-1.23247	2.1747e-248	2.3913e-244	12.2485	NA
ENSMUSG00000001123	Lgals9	36.707	38.4321	37.3601	15.1697	15.5839	15.5486	28.2006	31.0849	30.9055	16.1822	15.8277	15.4406	Lgals9	-1.28249	-0.319094	-1.24543	5.54902e-210	5.94411e-206	1.79039e-16	2.08741e-12	0.0353257	0.457315	1	-0.928073	5.41154e-106	5.02949e-102	2.90846	NA
ENSMUSG00000001127	Araf	31.075	31.2415	30.8481	77.8661	80.2133	79.8244	30.8953	31.0352	30.5187	75.7323	78.9638	74.9936	Araf	1.35331	-0.0110902	1.30149	0	0	0.752519	1	-0.050632	0.0584825	1	1.31377	0	0	-118.462	NA
ENSMUSG00000001128	Cfp	3.19818	3.11156	3.0723	3.23595	3.05665	2.81377	2.10763	2.48203	2.25189	2.6341	3.03656	3.1079	Cfp	-0.045507	-0.460342	-0.0995068	0.664495	1	7.41453e-06	0.069096	-0.0506215	0.608967	1	0.36423	0.000356041	0.792903	-0.791216	NA
ENSMUSG00000001131	Timp1	88.7782	90.0314	86.0508	307.395	303.985	306.526	84.303	90.0451	90.1296	279.154	276.262	267.84	Timp1	1.7935	-0.00206043	1.63614	0	0	0.947078	1	-0.157072	3.3592e-09	4.10359e-05	1.63849	0	0	-795.217	NA
ENSMUSG00000001134	Uxt	2.31505	1.64681	1.89283	3.70048	3.8643	3.89631	2.62648	2.39926	2.77317	4.28143	3.87109	4.0728	Uxt	0.980414	0.418966	1.0752	2.10198e-21	1.15105e-17	0.000196986	1	0.0934226	0.293099	1	0.654871	8.52955e-12	3.52782e-08	1.56306	NA
ENSMUSG00000001138	Cnnm3	17.3116	16.9269	16.0299	35.8817	34.3145	33.1098	16.8027	16.3696	17.739	35.4883	35.5074	35.5982	Cnnm3	1.04008	0.0182161	1.08515	1.00177e-145	1.00398e-141	0.696455	1	0.0457475	0.214929	1	1.06761	7.96019e-157	8.0971e-153	58.6081	NA
ENSMUSG00000001143	Lman2l	8.74688	8.52116	9.53449	38.8451	36.1189	36.0417	9.1037	9.7486	10.0038	41.785	41.9713	43.3778	Lman2l	2.05386	0.106788	2.24738	0	0	0.069553	1	0.195917	2.90081e-07	0.00348938	2.14299	0	0	20.0677	NA
ENSMUSG00000001150	Mcm3ap	60.5348	59.1218	61.5476	48.7605	46.962	45.1381	56.7372	53.7784	53.186	49.4212	50.4835	51.293	Mcm3ap	-0.364041	-0.146639	-0.26115	1.32297e-27	8.07673e-24	9.39436e-06	0.0869166	0.102784	0.00240148	1	-0.114618	0.000594959	1	0.781634	NA
ENSMUSG00000001151	Pcnt	35.9072	35.5359	36.5295	16.9157	15.7042	14.842	30.4768	27.7081	30.2665	15.2739	15.5697	14.8074	Pcnt	-1.1883	-0.288139	-1.24216	9.23265e-153	9.34437e-149	1.44587e-11	1.59769e-07	-0.0553699	0.269229	1	-0.955532	2.66176e-95	2.41129e-91	3.31622	NA
ENSMUSG00000001156	Mxd1	15.7453	16.4109	16.0797	39.1014	38.5418	39.5449	11.882	11.5363	12.4757	38.1979	37.92	36.7591	Mxd1	1.28274	-0.427545	1.22658	1.61797e-290	1.81682e-286	2.97509e-21	3.55464e-17	-0.054724	0.0768545	1	1.65556	0	0	-3.87225	NA
ENSMUSG00000001157	Gmcl1	48.271	49.4178	50.4008	50.891	51.3096	50.2651	47.4147	48.5313	47.4687	47.6969	48.0861	49.9663	Gmcl1	0.0416754	-0.0462695	-0.0230534	0.151397	1	0.117458	1	-0.0645739	0.0246825	1	0.0233712	0.42699	1	-0.50511	NA
ENSMUSG00000001158	Snrnp27	44.1886	44.2745	44.9187	37.2112	37.2187	38.0715	45.038	46.9919	46.2748	41.0153	38.4207	38.0255	Snrnp27	-0.245421	0.0523637	-0.184151	5.06423e-14	2.31233e-10	0.10217	1	0.0616908	0.0593848	1	-0.236094	1.90171e-13	8.35233e-10	-4.50874	NA
ENSMUSG00000001166	Oas1c	1.01535	0.731335	0.813026	1.57002	1.97405	1.91166	0.701727	0.69435	0.738498	1.51022	1.762	1.99222	Oas1c	1.11886	-0.272671	1.0448	1.35744e-12	5.90489e-09	0.161858	1	-0.0505238	0.725829	1	1.34109	2.45153e-16	1.17968e-12	-4.91835	NA
ENSMUSG00000001173	Ocrl	58.0854	55.127	59.2718	91.1775	91.3142	92.845	56.2016	54.6392	51.7567	87.0788	88.0071	88.2008	Ocrl	0.675151	-0.0851564	0.610818	9.01814e-106	8.39499e-102	0.00887103	1	-0.0647084	0.0298102	1	0.6956	5.04329e-111	4.74171e-107	-8.16849	NA
ENSMUSG00000001175	Calm1	293.647	292.334	293.289	254.022	259.839	262.713	307.675	312.462	313.12	277.568	273.577	277.368	Calm1	-0.179148	0.0859767	-0.0858119	3.63366e-16	1.75724e-12	8.3534e-05	0.725911	0.0933531	2.1153e-05	0.246433	-0.171772	3.54623e-15	1.65148e-11	-1.99789	NA
ENSMUSG00000001211	Agpat3	70.1492	73.9191	71.2991	147.531	143.056	142.025	69.541	68.9902	68.9421	150.324	156.348	154.478	Agpat3	1.00653	-0.0539017	1.09859	2.6008e-300	2.93189e-296	0.0636705	1	0.0922584	0.000329207	1	1.15269	0	0	-21.3851	NA
ENSMUSG00000001227	Sema6b	2.39836	2.91182	2.05895	1.60206	1.69911	1.52074	1.639	1.9689	2.16781	1.44864	1.71649	1.70576	Sema6b	-0.623719	-0.356476	-0.587102	7.35238e-06	0.0214248	0.0093961	1	0.0178405	0.921947	1	-0.249403	0.0818038	1	0.699635	NA
ENSMUSG00000001228	Uhrf1	214.149	215.118	211.956	44.7879	44.2813	44.266	218.718	218.609	221.089	49.8369	49.7552	48.5943	Uhrf1	-2.26654	0.038171	-2.11348	0	0	0.0724115	1	0.152391	8.38439e-08	0.00101351	-2.15232	0	0	-56.3863	NA
ENSMUSG00000001229	Dpp9	174.192	175.536	170.923	127.732	118.843	121.201	165.929	168.107	168.658	121.55	122.359	118.791	Dpp9	-0.501417	-0.0506415	-0.521564	2.03341e-77	1.74772e-73	0.0565426	1	-0.0202492	0.462178	1	-0.471025	1.44507e-68	1.19825e-64	9.30117	NA
ENSMUSG00000001240	Ramp2	4.99776	5.14224	4.56741	1.12151	1.28669	1.32528	4.93619	5.19665	4.77422	1.21771	1.23094	1.22331	Ramp2	-2.00354	0.0198977	-2.00011	4.76361e-84	4.17673e-80	0.815021	1	-0.0254301	0.892503	1	-2.04891	6.03107e-90	5.38876e-86	-102.972	NA
ENSMUSG00000001248	Gramd1a	47.6878	47.1707	47.6099	71.8112	68.1329	68.3826	39.565	41.8937	43.6853	75.9632	75.2919	72.4457	Gramd1a	0.548551	-0.187216	0.65064	4.08618e-59	3.25137e-55	1.50428e-07	0.00150849	0.10265	0.00154407	1	0.838418	4.38691e-135	4.32944e-131	-4.47834	NA
ENSMUSG00000001280	Sp1	99.1091	99.9518	103.843	109.086	112.743	108.827	113.091	99.9766	104.608	107.386	106.807	112.58	Sp1	0.126327	0.068663	0.10932	0.00054991	1	0.0614	1	-0.0168443	0.642177	1	0.0408192	0.263888	1	0.594486	NA
ENSMUSG00000001281	Itgb7	8.66357	9.33677	9.11918	1.39382	1.45853	1.23507	13.6896	15.5254	14.4768	1.63339	1.41302	1.69069	Itgb7	-2.76245	0.690018	-2.52084	4.15424e-191	4.37525e-187	4.37414e-29	5.33601e-25	0.222136	0.0988658	1	-3.23039	0	0	-4.68161	CBP.dependent
ENSMUSG00000001285	Myg1	28.0424	27.3632	27.2266	21.0806	20.9625	20.9764	29.4559	29.4462	31.2922	20.4314	20.6528	19.8883	Myg1	-0.391369	0.126347	-0.438608	2.70931e-26	1.61692e-22	0.000312807	1	-0.0478014	0.216607	1	-0.565518	3.39924e-55	2.648e-51	-4.47592	NA
ENSMUSG00000001288	Rarg	209.267	204.682	204.43	145.961	142.317	142.161	207.638	211.127	211.168	149.939	146.045	142.04	Rarg	-0.522773	0.0267164	-0.49775	2.29488e-97	2.0904e-93	0.276716	1	0.0251455	0.320737	1	-0.524344	7.6208e-99	6.97227e-95	-19.6263	NA
ENSMUSG00000001289	Pfdn5	59.2684	58.5558	60.0027	81.9829	83.083	79.5388	51.2976	56.0792	56.835	81.3517	77.0064	77.8733	Pfdn5	0.45984	-0.114966	0.409392	1.09003e-40	7.71194e-37	0.00123691	1	-0.0499989	0.136325	1	0.524808	6.41372e-52	4.90714e-48	-4.5649	NA
ENSMUSG00000001300	Efnb2	90.2279	91.596	91.2505	18.4215	17.9553	17.4581	96.1695	96.5502	95.5779	15.551	16.5105	14.9733	Efnb2	-2.3453	0.0783021	-2.53864	0	0	0.00159217	1	-0.194567	1.81989e-06	0.0216604	-2.61817	0	0	-33.4368	NA
ENSMUSG00000001305	Rrp15	36.9736	34.6371	36.9282	17.124	18.0756	16.541	39.2637	43.9959	42.2559	18.2144	18.225	18.3203	Rrp15	-1.07168	0.209895	-0.986364	2.05963e-122	1.98755e-118	6.3249e-07	0.00619587	0.0834807	0.0932052	1	-1.1981	2.71334e-161	2.77656e-157	-5.70808	NA
ENSMUSG00000001313	Rnd2	11.313	10.8015	10.8635	25.0211	25.3444	25.3967	10.9448	10.99	11.5172	27.3748	27.3139	27.3663	Rnd2	1.20229	0.0205368	1.3154	1.71201e-205	1.82808e-201	0.681173	1	0.115195	0.000440954	1	1.29695	1.65212e-253	1.82229e-249	63.1526	NA
ENSMUSG00000001323	Srr	8.13036	8.0884	8.30518	13.0393	12.0955	11.88	8.40074	8.44095	8.49044	11.6867	11.655	11.8072	Srr	0.595302	0.0469207	0.519359	3.49128e-30	2.20719e-26	0.42129	1	-0.0743816	0.121408	1	0.474003	8.09231e-20	4.25413e-16	10.1022	NA
ENSMUSG00000001366	Fbxo9	25.4263	26.5809	25.4325	41.4881	41.1882	40.5824	25.4223	25.2087	25.3732	41.5233	41.4099	43.8452	Fbxo9	0.67092	-0.0270438	0.710976	1.84517e-89	1.64294e-85	0.464411	1	0.0410325	0.187065	1	0.738997	7.59909e-110	7.12643e-106	-27.326	NA
ENSMUSG00000001376	Vps50	83.1129	83.3235	83.8248	77.1133	75.797	74.0208	92.0689	88.4064	90.8695	73.5307	76.6575	78.9889	Vps50	-0.141482	0.116691	-0.127583	1.27088e-06	0.00396133	5.22151e-05	0.460171	0.0145806	0.623907	1	-0.243592	2.85028e-17	1.40747e-13	-2.0875	NA
ENSMUSG00000001380	Hars	138.767	146.524	138.944	121.308	121.988	122.495	149.611	159.086	157.98	126.276	120.053	121.083	Hars	-0.21387	0.137603	-0.207353	9.53975e-13	4.17555e-09	3.5742e-06	0.033837	0.00630947	0.834287	1	-0.345163	4.24611e-31	2.70095e-27	-2.50841	NA
ENSMUSG00000001383	Zmat2	75.3147	77.348	77.6948	75.8799	76.8796	75.6747	68.7208	71.1752	71.2122	69.7742	68.4487	70.3651	Zmat2	-0.012334	-0.125937	-0.143179	0.641646	1	1.83033e-06	0.0175858	-0.130948	5.00527e-07	0.00600382	-0.0173447	0.514102	1	0.137725	NA
ENSMUSG00000001403	Ube2c	185.639	185.79	181.555	40.4469	36.2048	36.4777	166.666	176.152	175.569	43.5709	41.1519	39.2769	Ube2c	-2.29005	-0.0932159	-2.15812	0	0	0.00812664	1	0.132165	0.00118393	1	-2.06467	0	0	22.1493	NA
ENSMUSG00000001415	Smg5	163.944	163.652	158.78	130.423	129.325	128.494	176.122	171.467	172.139	121.904	125.44	128.817	Smg5	-0.325226	0.0957006	-0.370932	6.43145e-37	4.38947e-33	0.000151298	1	-0.0454987	0.0787007	1	-0.466425	8.28751e-75	7.03444e-71	-4.87379	NA
ENSMUSG00000001416	Cct3	403.688	414.591	407.134	267.493	268.362	274.215	426.809	448.706	445.323	271.256	271.392	263.784	Cct3	-0.597117	0.1082	-0.603681	7.30514e-124	7.06699e-120	1.39302e-05	0.127629	-0.00659653	0.797553	1	-0.711913	5.33555e-176	5.54737e-172	-6.57963	NA
ENSMUSG00000001418	Glmp	151.564	153.998	147.4	264.626	263.619	261.751	141.326	152.697	149.825	274.874	265.186	258.266	Glmp	0.802563	-0.0293041	0.817354	2.27026e-157	2.31045e-153	0.338547	1	0.015125	0.607075	1	0.846993	3.58982e-175	3.72983e-171	-28.9035	NA
ENSMUSG00000001419	Mef2d	112.856	112.003	110.703	112.626	110.079	110.526	112.12	109.163	110.745	105.045	107.034	106.398	Mef2d	-0.00999337	-0.0152991	-0.0753839	0.672363	1	0.519621	1	-0.0653782	0.00537395	1	-0.0600724	0.0108025	1	3.92652	NA
ENSMUSG00000001420	Tmem79	2.88158	2.76202	3.12214	1.57002	1.30387	1.32528	3.32943	3.55794	3.54668	1.46404	1.80752	1.38915	Tmem79	-1.07777	0.253761	-0.918983	1.33357e-20	7.17461e-17	0.00886185	1	0.153129	0.262445	1	-1.17844	6.70272e-28	4.09201e-24	-4.64391	NA
ENSMUSG00000001424	Snd1	327.689	330.684	322.178	203.852	198.131	202.422	340.212	341.23	336.325	211.275	215.372	211.619	Snd1	-0.698011	0.0537564	-0.619407	5.27871e-211	5.66036e-207	0.0148061	1	0.078511	0.000582405	1	-0.673256	6.59876e-199	7.0059e-195	-12.5242	NA
ENSMUSG00000001435	Col18a1	15.0121	14.5466	14.3022	1.77826	2.21463	1.79137	11.4134	11.768	13.2997	1.5872	1.45854	1.69069	Col18a1	-2.94864	-0.266558	-3.21341	6.42611e-272	7.14712e-268	1.92633e-05	0.175104	-0.287149	0.0191932	1	-2.96926	8.16513e-250	8.98409e-246	11.1392	NA
ENSMUSG00000001436	Slc19a1	39.1731	41.0287	40.45	10.8608	11.305	11.444	51.3311	53.2818	51.1681	11.8099	11.8978	12.0785	Slc19a1	-1.84642	0.368989	-1.75317	0	0	8.28576e-33	1.01683e-28	0.0905439	0.0623755	1	-2.12487	0	0	-5.75862	NA
ENSMUSG00000001440	Kpnb1	840.436	849.373	856.48	415.408	401.109	407.112	929.22	885.445	898.332	431.108	426.508	431.558	Kpnb1	-1.05724	0.0914892	-0.981926	0	0	0.00011241	0.965937	0.0752371	0.00189065	1	-1.07349	0	0	-11.7335	NA
ENSMUSG00000001441	Npepps	174.125	171.525	172.95	234.896	229.371	229.14	176.356	168.521	170.323	240.557	235.355	248.722	Npepps	0.419145	-0.00950591	0.482287	9.31796e-58	7.35653e-54	0.721619	1	0.0635758	0.0134929	1	0.492227	2.16671e-79	1.87225e-75	-51.7811	NA
ENSMUSG00000001445	Mrpl10	84.146	83.6564	80.4525	76.905	77.6013	77.2233	81.3405	85.5262	83.5884	80.12	78.8121	79.1849	Mrpl10	-0.099468	0.0127975	-0.0599004	0.000240142	0.581864	0.638264	1	0.0392808	0.145873	1	-0.0729848	0.00662058	1	-5.70305	NA
ENSMUSG00000001467	Cyp51	25.0098	24.7167	23.7048	15.0736	15.3777	14.6616	25.6733	26.4005	23.9271	18.5685	19.6058	18.7274	Cyp51	-0.704938	0.0498883	-0.367956	3.52563e-56	2.75916e-52	0.237058	1	0.336584	2.61268e-13	3.23973e-09	-0.418245	1.32145e-22	7.38558e-19	-8.38363	NA
ENSMUSG00000001472	Tcf25	223.43	223.008	218.036	253.813	249.46	247.182	212.157	218.195	209.654	248.117	254.625	248.903	Tcf25	0.175539	-0.0541009	0.177832	2.57001e-13	1.14622e-09	0.0254145	1	0.00233406	0.923641	1	0.231974	4.05736e-22	2.24616e-18	-4.28781	NA
ENSMUSG00000001473	Tubb6	231.895	236.307	227.455	58.5639	55.9837	56.1589	210.634	222.913	218.55	64.201	63.7298	64.9375	Tubb6	-2.02737	-0.0932828	-1.85063	0	0	0.000397216	1	0.176139	1.1093e-08	0.00013508	-1.75795	0	0	18.8454	NA
ENSMUSG00000001482	Def8	42.6223	41.3117	42.8256	58.8682	60.1766	59.1359	38.3767	38.7156	38.1698	62.0302	62.2428	60.7763	Def8	0.491222	-0.137248	0.545919	3.09638e-71	2.60127e-67	3.86728e-06	0.0365458	0.0548687	0.0342611	1	0.683339	9.21886e-136	9.111e-132	-4.97886	NA
ENSMUSG00000001493	Meox1	3.58142	2.91182	3.13875	1.32975	1.30387	1.23507	3.6307	3.67381	3.83255	1.44864	1.39785	1.4193	Meox1	-1.33807	0.211274	-1.16985	8.9613e-32	5.75047e-28	0.0224886	1	0.145657	0.289402	1	-1.40373	2.43565e-39	1.68912e-35	-6.64413	NA
ENSMUSG00000001497	Pax9	13.4625	12.2163	13.5713	4.90187	5.05001	4.97885	9.82339	9.76515	9.81886	5.37451	4.78149	5.1734	Pax9	-1.40026	-0.417662	-1.35646	2.38797e-119	2.29054e-115	3.3339e-14	3.81065e-10	0.0383752	0.613619	1	-0.944231	4.35332e-50	3.29329e-46	2.26075	NA
ENSMUSG00000001506	Col1a1	1369.36	1380.75	1359.45	194.497	183.919	183.643	1470.36	1459.69	1471.32	274.797	278.068	272.77	Col1a1	-2.87038	0.0989691	-2.31542	0	0	3.31636e-05	0.296284	0.554847	5.97719e-105	7.54202e-101	-2.41451	0	0	-24.3966	NA
ENSMUSG00000001507	Itga3	70.6491	71.5722	69.1893	121.837	114.427	114.045	75.0809	73.029	73.7345	120.78	121.525	117.947	Itga3	0.728828	0.0695161	0.768979	3.05039e-137	3.02385e-133	0.0222919	1	0.0403708	0.150257	1	0.699683	1.05753e-128	1.03098e-124	10.065	NA
ENSMUSG00000001517	Foxm1	183.773	188.802	182.984	56.8339	50.7254	54.054	169.461	165.144	172.66	57.6117	53.9885	54.8662	Foxm1	-1.7813	-0.131245	-1.73912	0	0	3.89823e-05	0.346514	0.0419513	0.238834	1	-1.6081	0	0	12.2527	NA
ENSMUSG00000001518	Itfg2	21.9938	20.7219	20.4156	19.6069	18.4192	18.1046	22.8113	22.5768	23.4226	18.2452	16.7077	18.3052	Itfg2	-0.170056	0.124409	-0.245878	0.000200087	0.492815	0.0053979	1	-0.0757084	0.102025	1	-0.370175	2.13033e-16	1.02703e-12	-2.97546	NA
ENSMUSG00000001520	Nrip2	0.948701	0.764625	0.962537	1.32975	1.23514	1.26514	0.902571	0.793666	0.62079	1.20231	1.21577	0.967003	Nrip2	0.533156	-0.215056	0.339168	0.000874896	1	0.240439	1	-0.184257	0.222542	1	0.564013	0.000846481	1	-2.62263	NA
ENSMUSG00000001521	Tulp3	141.433	144.693	137.798	119.787	116.712	116.556	127.752	132.933	130.335	117.639	118.293	115.882	Tulp3	-0.263973	-0.116554	-0.268762	2.14981e-24	1.24431e-20	6.23759e-06	0.0583651	-0.00509484	0.847122	1	-0.152513	4.25197e-09	1.55707e-05	1.30852	NA
ENSMUSG00000001524	Gtf2h4	29.692	30.8254	28.5722	25.1973	23.3167	24.4946	28.8366	31.2835	29.6275	24.5112	23.6723	23.175	Gtf2h4	-0.286684	0.0107664	-0.319866	6.79624e-12	2.87141e-08	0.799263	1	-0.0339817	0.434888	1	-0.331433	1.79987e-15	8.4576e-12	-30.7839	NA
ENSMUSG00000001525	Tubb5	1460.86	1477.67	1447.43	364.709	356.86	362.653	1317	1350.13	1343.12	423.364	425.386	415.26	Tubb5	-2.01626	-0.129203	-1.79491	0	0	6.53926e-09	6.8296e-05	0.221295	1.10626e-21	1.38582e-17	-1.66576	0	0	12.8926	NA
ENSMUSG00000001542	Ell2	41.4059	41.7611	41.4634	28.7855	28.1454	27.7423	44.2514	42.2578	40.8771	29.407	28.027	29.4921	Ell2	-0.558429	0.0316059	-0.520176	3.58807e-58	2.84175e-54	0.343449	1	0.0381513	0.296163	1	-0.551884	2.04621e-58	1.62264e-54	-17.4615	NA
ENSMUSG00000001552	Jup	26.1762	27.2134	25.1833	47.2548	43.4565	43.6345	20.0664	22.2127	21.8083	51.4535	52.5015	52.2278	Jup	0.774637	-0.294262	0.991803	1.69236e-81	1.47269e-77	3.00562e-11	3.30468e-07	0.217367	9.13969e-09	0.000111349	1.28627	5.60354e-221	6.06919e-217	-4.37117	NA
ENSMUSG00000001555	Fkbp10	261.805	264.171	257.573	197.492	197.546	195.175	279.858	289.752	288.653	217.048	216.222	215.493	Fkbp10	-0.408917	0.131423	-0.272257	5.94568e-72	5.01518e-68	4.75506e-09	4.98521e-05	0.136548	2.51178e-09	3.07216e-05	-0.403792	9.71738e-72	8.13636e-68	-3.07247	NA
ENSMUSG00000001558	Klhl10	1.64854	1.69674	1.42768	0.737062	0.599323	0.814082	1.45489	1.55508	1.41112	0.694257	1.00334	0.529779	Klhl10	-1.17625	-0.112336	-1.14527	2.71414e-12	1.16436e-08	0.447907	1	0.04416	0.867598	1	-1.01981	2.11261e-09	7.83567e-06	9.0782	NA
ENSMUSG00000001569	Nom1	36.1905	35.7856	35.1008	32.3095	29.1593	29.5314	36.4519	35.2892	37.1272	29.3146	29.9692	28.1955	Nom1	-0.23467	0.0238804	-0.291976	1.49892e-09	5.6689e-06	0.535187	1	-0.0572917	0.148066	1	-0.315843	3.29592e-16	1.58204e-12	-13.226	NA
ENSMUSG00000001576	Ergic1	339.353	341.403	340.302	152.096	148.297	149.904	343.358	359.835	358	169.491	170.535	167.384	Ergic1	-1.18119	0.0556348	-1.00888	0	0	0.0176218	1	0.172211	4.41592e-12	5.46073e-08	-1.06462	0	0	-19.1358	NA
ENSMUSG00000001604	Tcea3	3.99799	4.49309	4.66708	4.48539	4.31109	4.93375	3.48007	3.70692	3.88299	4.75869	4.08352	4.04265	Tcea3	0.0646077	-0.25133	-0.0312748	0.479891	1	0.00609845	1	-0.095796	0.286718	1	0.220149	0.0153542	1	-0.875937	NA
ENSMUSG00000001627	Ifrd1	52.8199	55.3267	54.3877	55.0077	56.5508	55.9334	80.3196	83.7055	82.529	60.2597	61.6966	61.2738	Ifrd1	0.0431769	0.60146	0.173105	0.135441	1	1.31585e-104	1.65416e-100	0.129864	4.20462e-06	0.0496902	-0.42842	1.99347e-56	1.56507e-52	-0.7123	CBP.dependent
ENSMUSG00000001630	Stk38l	21.9105	20.7385	21.2296	27.0234	27.5956	26.9755	23.0289	22.163	22.9518	25.9276	28.8008	28.5875	Stk38l	0.353224	0.0933007	0.381992	5.36566e-17	2.65117e-13	0.0322932	1	0.0307896	0.453599	1	0.290714	2.4747e-12	1.04506e-08	3.11588	NA
ENSMUSG00000001632	Brpf1	53.9697	54.378	54.9359	60.5822	57.8911	57.5422	54.2601	53.9274	50.5628	55.718	57.3418	57.3086	Brpf1	0.108324	-0.0405625	0.061188	0.000575524	1	0.204669	1	-0.046955	0.130656	1	0.101932	0.00121836	1	-2.51295	NA
ENSMUSG00000001642	Akr1b3	108.29	107.192	109.624	85.2186	86.4339	83.3126	100.889	107.045	105.465	85.2313	83.6827	83.5723	Akr1b3	-0.35113	-0.0528945	-0.364704	2.77212e-38	1.9183e-34	0.0484034	1	-0.0137322	0.615011	1	-0.311968	1.22806e-30	7.76991e-27	5.89793	NA
ENSMUSG00000001655	Hoxc13	2.66497	2.69544	2.85634	1.50595	1.87095	1.44556	1.94026	2.18408	2.25189	1.44864	1.91374	1.47961	Hoxc13	-0.787134	-0.370534	-0.774165	1.41171e-10	5.61297e-07	0.00159517	1	0.0132379	0.971247	1	-0.403367	0.00152796	1	1.08861	NA
ENSMUSG00000001657	Hoxc8	34.0576	34.8534	34.4031	34.1677	35.6893	33.3053	34.9623	36.2493	37.1777	40.5688	37.4193	39.2015	Hoxc8	-0.0031903	0.0692174	0.181081	0.947858	1	0.0628183	1	0.185033	3.61599e-07	0.00434462	0.112625	0.0018875	1	1.62712	NA
ENSMUSG00000001661	Hoxc6	59.5684	58.0565	59.0724	67.342	65.4521	64.5636	51.532	50.4845	51.1681	62.4305	61.818	62.0126	Hoxc6	0.159415	-0.206158	0.0761166	1.81179e-09	6.81957e-06	7.70294e-14	8.76672e-10	-0.0833505	0.00136621	1	0.282223	1.83818e-25	1.0768e-21	-1.36897	NA
ENSMUSG00000001663	Gstt1	6.96397	7.4226	6.77685	0.689006	0.582139	0.618623	4.86924	5.06423	4.08478	0.571093	0.487447	0.559932	Gstt1	-3.54812	-0.596967	-3.71134	9.7041e-180	1.01156e-175	3.18733e-12	3.5561e-08	-0.237996	0.261737	1	-3.18923	5.62744e-122	5.41416e-118	5.34239	NA
ENSMUSG00000001665	Gstt3	5.5143	5.30869	5.34819	4.85382	5.23903	5.15927	4.04912	4.74973	3.69802	5.09739	4.40216	4.60049	Gstt3	-0.0852655	-0.373519	-0.200276	0.305076	1	1.18605e-05	0.109117	-0.114083	0.175129	1	0.174178	0.0437946	1	-0.466316	NA
ENSMUSG00000001666	Ddt	1.43192	1.56358	1.46091	1.05743	1.2695	1.11479	1.5051	1.40611	1.4952	0.879004	1.04886	1.163	Ddt	-0.385781	-0.0168698	-0.536352	0.00699164	1	0.900234	1	-0.154039	0.315636	1	-0.522959	0.000266793	0.610956	30.9996	NA
ENSMUSG00000001674	Ddx18	93.8604	92.7279	92.7954	74.9988	72.8929	73.4795	112.137	110.984	114.798	76.2095	73.38	74.873	Ddx18	-0.335776	0.27447	-0.315923	1.43609e-38	9.97078e-35	3.34993e-28	4.07954e-24	0.0198386	0.449575	1	-0.590409	1.84368e-121	1.77196e-117	-2.15108	NA
ENSMUSG00000001687	Ubl3	38.3233	37.8662	38.3901	84.5619	79.1651	78.6066	40.7031	41.9102	40.5408	78.796	81.4674	78.7779	Ubl3	1.08121	0.104259	1.06076	1.39457e-247	1.53236e-243	0.00281558	1	-0.0196907	0.51276	1	0.957257	6.9245e-198	7.34413e-194	9.18155	NA
ENSMUSG00000001700	Gramd3	9.79664	10.5352	9.56772	9.99576	9.46632	9.66986	11.1289	11.0066	11.265	9.82383	10.3804	10.0281	Gramd3	-0.0370398	0.160157	0.0168173	0.491902	1	0.00221633	1	0.0532121	0.312121	1	-0.143986	0.00499514	1	-0.899033	NA
ENSMUSG00000001707	Eef1e1	35.2574	35.0698	33.0409	24.7328	24.9664	25.7726	41.8747	43.5324	42.5922	27.5441	26.6159	26.2808	Eef1e1	-0.453585	0.308675	-0.361456	8.23384e-37	5.61054e-33	2.84137e-20	3.38208e-16	0.091309	0.0129114	1	-0.670952	2.63558e-86	2.328e-82	-2.17365	NA
ENSMUSG00000001729	Akt1	373.079	380.186	367.945	224.307	212.789	216.029	361.25	367.102	368.897	228.564	231.031	226.017	Akt1	-0.779618	-0.0311667	-0.70952	5.87405e-217	6.33457e-213	0.201171	1	0.0699484	0.00526143	1	-0.678503	5.68296e-166	5.84947e-162	21.7701	NA
ENSMUSG00000001739	Cldn15	1.09867	1.58023	1.54397	0.368636	0.204089	0.302883	0.919308	1.0254	1.36067	0.23239	0.396407	0.273475	Cldn15	-2.38569	-0.362881	-2.24446	6.08649e-25	3.55938e-21	0.0453563	1	0.0388298	0.927062	1	-1.98418	1.01477e-16	4.94396e-13	5.46785	NA
ENSMUSG00000001741	Il16	1.69853	1.74668	1.71009	0.192433	0.066616	0.0773536	1.35447	1.55508	1.66335	0.0784345	0.092941	0.0473245	Il16	-4.36027	-0.176317	-4.61472	4.35761e-68	3.61203e-64	0.202901	1	-0.949285	0.211641	1	-5.13344	2.61303e-69	2.17195e-65	29.1149	NA
ENSMUSG00000001750	Tcirg1	79.597	79.6949	78.9573	105.963	102.45	102.783	70.6289	74.0388	74.6762	107.463	105.365	103.142	Tcirg1	0.385524	-0.119315	0.407124	1.21623e-44	8.8748e-41	2.77712e-05	0.249635	0.0218693	0.413314	1	0.526709	2.03467e-81	1.77078e-77	-4.41443	NA
ENSMUSG00000001751	Naglu	27.5758	27.4631	26.8611	118.713	113.533	112.12	31.163	32.3428	32.4357	122.027	122.511	117.827	Naglu	2.07316	0.228553	2.14538	0	0	6.7546e-10	7.23485e-06	0.0735606	0.00810066	1	1.91817	0	0	8.39266	NA
ENSMUSG00000001755	Coasy	33.4911	33.6384	32.908	35.9457	33.7131	33.1098	41.7408	41.2812	40.4231	34.195	33.717	32.9899	Coasy	0.0386263	0.303615	0.0123208	0.261267	1	1.67307e-19	1.98409e-15	-0.0262911	0.439285	1	-0.29128	1.58176e-18	8.06538e-15	-0.959374	NA
ENSMUSG00000001761	Smo	399.956	397.43	392.149	259.548	241.675	244.04	373.434	373.061	373.79	254.767	256.567	256.216	Smo	-0.674586	-0.0865376	-0.632022	7.5852e-151	7.66181e-147	0.000683773	1	0.0424665	0.102179	1	-0.545582	1.10106e-99	1.00923e-95	6.30456	NA
ENSMUSG00000001763	Tspan33	0.432155	0.631465	0.663516	6.00715	6.01232	5.95614	0.751938	0.644693	0.452635	5.31293	5.6312	5.59555	Tspan33	3.44951	0.104415	3.28421	1.37917e-194	1.4564e-190	0.676314	1	-0.120237	0.0747737	1	3.22497	4.72714e-172	4.89543e-168	30.8859	NA
ENSMUSG00000001767	Crnkl1	52.0868	51.3652	51.6965	51.804	54.4887	53.1068	57.5071	54.0433	54.9012	53.147	52.3346	53.0872	Crnkl1	0.0386062	0.101457	0.0314467	0.198041	1	0.000735002	1	-0.00713891	0.808189	1	-0.0699897	0.0183591	1	-0.689847	NA
ENSMUSG00000001768	Rin2	86.0955	84.2556	87.8449	30.115	30.534	29.772	85.1231	82.3812	80.5616	30.4847	29.6505	31.6933	Rin2	-1.51514	-0.0577574	-1.49178	0	0	0.0467457	1	0.0228431	0.532896	1	-1.43454	0	0	24.8374	NA
ENSMUSG00000001774	Chordc1	64.7172	63.3163	66.631	81.8708	86.537	86.0791	79.1982	72.6152	76.9631	89.4497	85.5035	89.6783	Chordc1	0.386694	0.232971	0.442967	1.73279e-29	1.08542e-25	1.69761e-11	1.8728e-07	0.0564615	0.0921546	1	0.210185	4.88089e-10	1.86889e-06	0.902194	NA
ENSMUSG00000001783	Rtcb	96.7097	99.2194	98.3273	73.2048	72.91	71.9309	101.291	101.533	103.162	75.1165	72.2117	73.0638	Rtcb	-0.432794	0.0563822	-0.417119	3.69962e-66	3.04257e-62	0.0212368	1	0.0155621	0.549877	1	-0.473614	1.372e-80	1.19062e-76	-8.40006	NA
ENSMUSG00000001785	Pwp1	44.2719	45.9556	45.9487	26.2866	27.6471	25.6523	50.6951	49.8058	51.3195	27.2978	27.0407	26.9442	Pwp1	-0.777201	0.156916	-0.744255	6.27758e-125	6.08235e-121	1.8888e-07	0.00188615	0.0320392	0.377809	1	-0.902079	4.80783e-178	5.01072e-174	-5.74881	NA
ENSMUSG00000001786	Fbxo7	8.71356	8.388	8.13906	12.2544	12.5595	12.8573	9.40496	9.79826	10.0711	13.8421	12.793	13.8727	Fbxo7	0.579992	0.214604	0.681998	5.59683e-27	3.38496e-23	0.000182928	1	0.104393	0.0326816	1	0.469782	6.1738e-20	3.25915e-16	2.18907	NA
ENSMUSG00000001794	Capns1	185.072	188.27	181.655	192.446	192.047	196.047	187.721	198.895	196.908	209.658	207.482	199	Capns1	0.0650297	0.0723397	0.150566	0.0191059	1	0.00917673	1	0.085741	0.00182318	1	0.0784309	0.00441775	1	1.0842	NA
ENSMUSG00000001829	Clpb	42.3057	43.7086	43.4568	50.5226	50.1239	48.942	47.6992	48.3988	49.9406	51.6228	51.1966	49.9361	Clpb	0.208103	0.173776	0.238597	2.7308e-12	1.17124e-08	7.364e-09	7.67992e-05	0.030557	0.293179	1	0.0648833	0.0257056	1	0.373373	NA
ENSMUSG00000001833	Sept7	270.536	274.507	280.332	253.028	262.949	261.24	292.695	287.517	288.838	278.184	266.885	282.555	Sept7	-0.0867778	0.0743916	0.00366323	0.000936644	1	0.00446098	1	0.0907025	0.00052415	1	-0.0704669	0.00691729	1	-0.947243	NA
ENSMUSG00000001844	Zdhhc4	65.8169	65.8297	63.6076	51.3555	51.5674	53.5277	57.574	62.8823	59.4918	51.6382	52.0919	49.1522	Zdhhc4	-0.319385	-0.117729	-0.353214	8.45069e-21	4.56422e-17	0.000515401	1	-0.0337947	0.334547	1	-0.235451	7.07864e-12	2.93551e-08	1.99995	NA
ENSMUSG00000001847	Rac1	484.119	494.786	481.191	476.455	472.028	472.937	454.977	465.854	467.284	471.322	466.414	465.329	Rac1	-0.0387261	-0.0729387	-0.0574009	0.0751233	1	0.000817022	1	-0.0187655	0.388323	1	0.0154471	0.478158	1	-0.211782	NA
ENSMUSG00000001855	Nup214	77.6308	74.252	75.7512	71.3947	66.1223	69.0141	75.0474	69.4702	72.1707	67.665	66.1879	66.807	Nup214	-0.139985	-0.0711794	-0.181784	1.86667e-05	0.0518374	0.0298733	1	-0.0420779	0.203435	1	-0.110883	0.000730928	1	1.5578	NA
ENSMUSG00000001864	Aif1l	6.0975	6.37397	6.27848	3.25197	3.4347	3.38511	6.60988	6.71948	6.72481	3.26532	3.49176	3.6205	Aif1l	-0.90311	0.0974691	-0.854485	3.42295e-35	2.29372e-31	0.124003	1	0.0445281	0.606493	1	-0.956063	4.71394e-42	3.35255e-38	-9.80889	NA
ENSMUSG00000001870	Ltbp1	489.235	483.151	495.91	46.1655	44.6594	46.4311	512.084	488.978	494.794	51.1302	52.0312	52.3183	Ltbp1	-3.41947	0.0268227	-3.23933	0	0	0.270941	1	0.179427	1.19877e-08	0.00014595	-3.26687	0	0	-121.795	NA
ENSMUSG00000001891	Ugp2	74.3982	74.7846	76.4489	84.0173	84.2172	84.8312	74.629	77.25	76.3746	87.7562	84.6993	86.4067	Ugp2	0.165688	0.0166967	0.198163	1.20452e-10	4.80844e-07	0.525504	1	0.0325458	0.19521	1	0.181537	1.08738e-12	4.64092e-09	10.8726	NA
ENSMUSG00000001909	Trmt1	76.781	79.3121	77.6782	74.31	70.4012	72.9383	82.3113	86.8835	88.5826	70.4208	70.8916	66.6411	Trmt1	-0.1028	0.141076	-0.169257	0.00170875	1	1.44319e-05	0.132081	-0.0661725	0.0450074	1	-0.310049	1.76304e-21	9.64029e-18	-2.19774	NA
ENSMUSG00000001910	Nacc1	258.589	262.14	259.018	267.381	256.505	261.902	256.627	251.019	248.565	257.616	257.402	258.522	Nacc1	0.0112486	-0.0442207	-0.0115062	0.629445	1	0.0568743	1	-0.0227779	0.324993	1	0.0326914	0.15795	1	-0.739278	NA
ENSMUSG00000001911	Nfix	401.189	400.26	393.777	128.949	127.332	123.201	377.301	377.017	372.428	135.128	135.757	137.095	Nfix	-1.6557	-0.0851213	-1.55069	0	0	0.000130621	1	0.1048	1.98322e-05	0.231244	-1.46578	0	0	17.2199	NA
ENSMUSG00000001918	Slc1a5	86.1122	83.5732	85.6355	41.9366	38.4731	41.2139	125.794	129.672	130.84	38.8599	39.4373	37.5582	Slc1a5	-1.06941	0.597606	-1.14017	3.15847e-249	3.47369e-245	1.19758e-93	1.50428e-89	-0.0712557	0.0395091	1	-1.73827	0	0	-2.90872	CBP.dependent
ENSMUSG00000001924	Uba1	274.018	275.489	269.418	314.011	312.336	312.21	288.477	287.236	285.828	312.547	315.288	316.296	Uba1	0.196735	0.0732015	0.205303	4.37365e-21	2.37795e-17	0.000489746	1	0.00855528	0.679928	1	0.132088	2.0736e-10	8.0808e-07	1.80445	NA
ENSMUSG00000001942	Siae	6.41409	6.62364	6.56089	9.06668	9.36322	9.39922	6.74378	5.59391	5.86722	9.56211	9.62178	9.81703	Siae	0.507886	-0.107231	0.565386	1.17248e-16	5.74282e-13	0.115878	1	0.0597101	0.292948	1	0.674832	2.03192e-28	1.2474e-24	-6.29326	NA
ENSMUSG00000001962	Fam50a	39.0898	38.482	39.1709	90.9853	92.5515	90.2288	39.0796	41.7282	41.9869	99.7186	95.8213	96.3121	Fam50a	1.22999	0.0729926	1.32172	0	0	0.0281339	1	0.0925284	0.000744651	1	1.24952	0	0	17.1185	NA
ENSMUSG00000001964	Emd	92.1441	92.4116	91.9316	60.7904	59.8673	60.2635	95.5168	102.741	101.9	58.3199	57.266	56.8262	Emd	-0.61201	0.118578	-0.681435	2.20249e-97	2.00647e-93	2.53804e-05	0.228703	-0.0696833	0.0219112	1	-0.800271	8.85276e-168	9.1325e-164	-6.74892	NA
ENSMUSG00000001983	Taco1	11.5462	12.5659	11.3785	14.1606	12.1299	12.8423	12.2168	12.9101	12.9634	12.2717	12.6261	12.5761	Taco1	0.142328	0.102276	0.0797295	0.0133652	1	0.0777678	1	-0.0635911	0.263616	1	-0.0235394	0.684224	1	-0.230155	NA
ENSMUSG00000001986	Gria3	71.6156	73.3532	75.1199	15.4741	15.5667	15.5938	73.357	68.5102	69.7324	18.3222	18.8775	19.2249	Gria3	-2.2408	-0.0568262	-1.9637	0	0	0.0670982	1	0.275538	2.99884e-10	3.68348e-06	-1.90844	0	0	33.5839	NA
ENSMUSG00000001988	Npas1	1.11533	0.764625	0.879476	0.897247	0.719612	0.799047	0.634779	0.892981	0.889838	0.879004	0.836433	1.02731	Npas1	-0.19582	-0.197299	0.00337588	0.296833	1	0.291223	1	0.187467	0.333515	1	0.188948	0.328101	1	-0.957671	NA
ENSMUSG00000001995	Sipa1l2	150.431	143.495	146.619	46.9504	45.6904	48.4007	146.765	138.031	136.793	45.9726	46.7509	45.8202	Sipa1l2	-1.64307	-0.0634685	-1.66873	0	0	0.0338241	1	-0.0265204	0.452419	1	-1.60612	0	0	25.3058	NA
ENSMUSG00000001998	Ap4e1	19.9943	19.2738	20.9804	26.1744	26.2896	26.6597	20.9702	18.7863	20.5808	23.295	24.6434	24.9993	Ap4e1	0.393885	0.00188578	0.275945	5.70867e-19	2.96337e-15	0.972146	1	-0.117613	0.00606293	1	0.274387	7.13141e-10	2.71207e-06	145.504	NA
ENSMUSG00000001999	Blvra	23.7101	24.0342	24.0703	27.3438	27.5784	27.5318	24.6189	25.8377	25.844	30.7156	30.4092	29.0248	Blvra	0.199498	0.0875518	0.327641	2.26556e-08	8.02689e-05	0.0165099	1	0.128742	0.000141487	1	0.240688	2.9526e-12	1.24393e-08	2.7491	NA
ENSMUSG00000002006	Pdzd4	26.4261	25.6821	26.2465	18.9341	17.9037	18.3302	25.4055	25.4735	24.3474	18.43	20.0155	19.7224	Pdzd4	-0.506352	-0.0587527	-0.430614	3.75044e-37	2.5668e-33	0.125608	1	0.0762418	0.0656976	1	-0.371359	4.50976e-21	2.44655e-17	6.32071	NA
ENSMUSG00000002010	Idh3g	69.566	68.1933	66.2655	55.1199	58.6988	59.602	69.3903	71.3407	72.2548	57.0113	58.0702	56.2231	Idh3g	-0.234416	0.062047	-0.252021	1.66109e-13	7.46163e-10	0.0481061	1	-0.0178885	0.581214	1	-0.314352	2.29729e-23	1.30027e-19	-5.06635	NA
ENSMUSG00000002014	Ssr4	69.2161	69.7246	69.9867	51.8681	52.9593	51.498	71.9846	81.3881	75.9037	56.6572	58.2522	54.7908	Ssr4	-0.418936	0.134224	-0.30045	1.34485e-29	8.43626e-26	0.000215849	1	0.118747	0.00152125	1	-0.434413	1.24403e-32	8.07625e-29	-3.23648	NA
ENSMUSG00000002015	Bcap31	166.827	170.327	165.956	166.192	172.269	169.63	172.34	176.483	181.555	182.639	180.898	184.45	Bcap31	0.0141064	0.0761483	0.123317	0.577117	1	0.00263427	1	0.109194	1.37646e-05	0.161046	0.0471519	0.0604602	1	0.619212	NA
ENSMUSG00000002017	Fam98a	66.7334	66.329	67.146	45.733	45.4155	46.6265	70.9301	68.7419	69.3289	46.1112	45.7798	46.4383	Fam98a	-0.538967	0.0619999	-0.533402	1.29091e-91	1.15692e-87	0.0142923	1	0.00528888	0.846483	1	-0.595678	1.10708e-114	1.04763e-110	-9.60773	NA
ENSMUSG00000002020	Ltbp2	1484.94	1492.37	1480.69	436.328	425.047	428.131	1286.14	1247.91	1238.49	441.1	466.096	453.374	Ltbp2	-1.78963	-0.240862	-1.71254	0	0	6.14535e-22	7.36397e-18	0.0773892	0.0025499	1	-1.47137	0	0	6.10879	NA
ENSMUSG00000002028	Kmt2a	127.319	119.16	128.313	220.11	204.403	204.752	130.798	110.852	112.915	187.781	190.518	204.593	Kmt2a	0.747728	-0.0800799	0.636908	3.84665e-51	2.92268e-47	0.10942	1	-0.110447	0.0246523	1	0.717361	4.021e-47	2.98037e-43	-8.95807	NA
ENSMUSG00000002031	Ift46	46.788	45.6893	45.4171	38.2043	37.3905	38.3872	37.4729	41.6785	40.9611	37.228	33.9446	35.176	Ift46	-0.274629	-0.199249	-0.37569	1.94931e-12	8.41519e-09	3.26133e-07	0.00323393	-0.10055	0.0115463	1	-0.175931	9.14624e-06	0.025518	0.88297	NA
ENSMUSG00000002043	Trappc6a	7.43052	6.79009	6.61072	6.45567	6.54502	7.09882	6.57641	6.70293	7.38062	7.39133	7.28509	7.19368	Trappc6a	-0.0498164	-0.012137	0.0719362	0.458527	1	0.871229	1	0.120284	0.0657912	1	0.0826033	0.213969	1	-6.80593	NA
ENSMUSG00000002052	Supt6	152.063	151.185	152.699	285.081	273.861	275.418	145.912	138.859	142.728	266.145	274.988	279.162	Supt6	0.871961	-0.0929979	0.847	2.405e-236	2.62409e-232	0.000669735	1	-0.0245313	0.342976	1	0.940428	3.19296e-273	3.556e-269	-10.1124	NA
ENSMUSG00000002055	Spag5	59.7017	57.374	59.1222	13.9203	13.6421	14.0902	51.5152	47.5712	49.8229	14.2424	13.8248	14.0837	Spag5	-2.08237	-0.242997	-2.06347	0	0	6.71112e-14	7.6433e-10	0.0163814	0.72786	1	-1.82299	0	0	7.50213	NA
ENSMUSG00000002058	Unc119	19.561	20.106	20.0002	25.4056	25.585	23.3068	18.6605	20.4747	20.7826	25.5581	25.6448	24.5319	Unc119	0.315452	0.0060667	0.343826	4.26558e-12	1.81714e-08	0.904361	1	0.0289445	0.523082	1	0.338331	7.43918e-14	3.31267e-10	55.7685	NA
ENSMUSG00000002059	Rab34	81.7799	86.7191	82.3629	105.754	100.628	102.513	79.399	88.7043	81.9573	100.796	104.849	98.3324	Rab34	0.300427	-0.00454065	0.277065	5.52982e-16	2.66206e-12	0.90484	1	-0.0232696	0.527465	1	0.281699	2.83353e-14	1.27991e-10	-62.0392	NA
ENSMUSG00000002064	Sdf2	27.1926	26.8972	27.0771	40.9275	40.0197	42.1009	24.5352	26.4832	25.3564	43.1399	44.308	42.8953	Sdf2	0.601696	-0.0877439	0.683222	1.69965e-71	1.42992e-67	0.0166494	1	0.0822714	0.0079875	1	0.771712	3.65943e-118	3.49256e-114	-8.79506	NA
ENSMUSG00000002068	Ccne1	65.9502	66.5787	63.5411	24.0119	23.7463	23.1114	72.2524	72.7145	74.3735	27.3594	26.1759	27.4718	Ccne1	-1.46986	0.161859	-1.2753	0	0	8.62004e-09	8.97863e-05	0.193656	1.01506e-07	0.00122619	-1.43807	0	0	-8.8847	NA
ENSMUSG00000002083	Bbc3	10.8964	10.0858	10.3983	6.80807	5.58271	6.42224	11.5306	12.5791	12.5262	5.99033	6.57194	5.7614	Bbc3	-0.738043	0.22405	-0.777645	4.07411e-27	2.46891e-23	0.000399423	1	-0.0411089	0.602432	1	-1.00321	2.24475e-51	1.71184e-47	-4.47761	NA
ENSMUSG00000002102	Psmc3	189.488	190.633	188.565	171.991	172.406	171.179	177.695	186.911	195.882	177.666	174.465	172.088	Psmc3	-0.141508	-0.0209686	-0.117575	1.14205e-06	0.00357066	0.471032	1	0.0239998	0.409884	1	-0.0965398	0.000881995	1	4.60401	NA
ENSMUSG00000002103	Acp2	75.8646	76.0497	77.2463	96.7359	94.9573	96.6188	79.4995	77.2831	79.0482	102.136	97.3387	102.448	Acp2	0.331576	0.0413636	0.397473	4.81698e-35	3.224e-31	0.13259	1	0.066361	0.0106492	1	0.356574	4.16365e-41	2.93412e-37	8.62047	NA
ENSMUSG00000002105	Slc39a13	60.7348	58.8554	58.2916	87.5734	85.4716	85.5679	55.4149	55.9303	54.3631	88.7261	93.2874	87.4771	Slc39a13	0.540138	-0.102271	0.598987	8.63699e-75	7.35526e-71	0.000962309	1	0.0594416	0.0358337	1	0.701852	3.34066e-125	3.23008e-121	-6.86264	NA
ENSMUSG00000002107	Celf2	75.7979	76.2328	77.8609	35.321	33.0945	33.1549	71.2983	67.7488	68.4713	32.5631	32.8673	33.985	Celf2	-1.17913	-0.147815	-1.20956	2.78318e-305	3.14304e-301	6.29555e-07	0.00616838	-0.0309289	0.376863	1	-1.06225	1.54112e-244	1.69138e-240	7.1863	NA
ENSMUSG00000002109	Ddb2	6.34744	5.74146	6.79346	6.64789	6.63094	6.97854	6.25841	6.1567	6.20353	6.0981	6.04088	5.44478	Ddb2	0.103018	-0.0204745	-0.101249	0.141586	1	0.785938	1	-0.206757	0.00283279	1	-0.0832622	0.24426	1	4.06662	NA
ENSMUSG00000002129	Sf3a1	121.254	123.138	124.542	142.565	140.426	144.085	131.401	129.573	131.361	147.045	142.419	143.819	Sf3a1	0.211411	0.0887198	0.231902	6.01225e-19	3.11855e-15	0.000217841	1	0.0205419	0.376549	1	0.143233	1.18264e-09	4.44317e-06	1.61444	NA
ENSMUSG00000002147	Stat6	57.1356	58.7223	56.4477	79.9646	71.9821	79.1629	59.3816	59.8201	61.7451	75.6091	76.4299	76.7274	Stat6	0.424574	0.0706071	0.409076	3.86775e-34	2.55929e-30	0.0473135	1	-0.0154571	0.658949	1	0.33851	1.42548e-22	7.96131e-19	4.79427	NA
ENSMUSG00000002205	Vrk3	19.6777	19.4735	19.7511	31.0761	30.7918	30.9448	18.4095	19.6636	19.6055	29.7457	30.2575	28.1654	Vrk3	0.656905	-0.0302845	0.581297	3.54207e-68	2.93709e-64	0.467865	1	-0.0743545	0.0344033	1	0.612837	5.75957e-59	4.57886e-55	-20.2359	NA
ENSMUSG00000002210	Smg9	12.0295	13.5979	12.8237	13.0553	12.0611	13.3385	13.1038	13.6219	14.6113	12.749	11.7157	12.1388	Smg9	0.00182735	0.104529	-0.0701036	0.99495	1	0.0708509	1	-0.0732309	0.212395	1	-0.175934	0.00219904	1	-1.6831	NA
ENSMUSG00000002221	Paxip1	50.5205	51.3319	51.5304	33.2546	33.6787	32.6137	53.0885	52.5204	51.269	31.9473	33.3377	33.2312	Paxip1	-0.624836	0.0325549	-0.638922	1.84207e-97	1.67886e-93	0.249552	1	-0.0142045	0.649299	1	-0.671597	7.21034e-115	6.82675e-111	-20.6297	NA
ENSMUSG00000002222	Rmnd5a	74.8481	77.0151	76.0004	160.057	156.872	160.383	81.6083	81.1398	79.1659	155.528	156.545	158.579	Rmnd5a	1.06725	0.0863861	1.04654	0	0	0.000915622	1	-0.0204476	0.372448	1	0.96042	0	0	11.1178	NA
ENSMUSG00000002227	Mov10	103.491	104.146	104.042	56.7858	55.8462	52.2648	82.7632	83.2751	85.085	54.3016	54.1403	53.8109	Mov10	-0.91978	-0.311793	-0.941826	4.68906e-230	5.09888e-226	8.41665e-30	1.0286e-25	-0.0224479	0.449667	1	-0.630435	1.13541e-105	1.05468e-101	2.02196	NA
ENSMUSG00000002233	Rhoc	291.598	291.152	286.91	239.509	249.03	239.168	289.632	313.306	311.337	256.076	244.99	244.184	Rhoc	-0.257255	0.0721947	-0.223028	2.39022e-17	1.19105e-13	0.0169049	1	0.0344801	0.25764	1	-0.29497	1.95276e-22	1.0871e-18	-4.08575	NA
ENSMUSG00000002249	Tead3	64.0173	65.5467	64.5379	67.5823	67.1362	63.9472	48.9043	51.908	51.5717	59.4438	61.211	60.2938	Tead3	0.0329671	-0.349251	-0.101268	0.267552	1	9.20791e-30	1.12511e-25	-0.134212	6.606e-06	0.077812	0.248007	8.04602e-16	3.81462e-12	-0.710109	NA
ENSMUSG00000002250	Ppard	73.7317	70.5069	71.5981	99.6673	99.0986	96.3783	65.7249	67.6329	66.8402	95.0691	94.9716	93.2515	Ppard	0.451349	-0.108522	0.392543	5.6278e-66	4.62549e-62	8.06051e-05	0.701002	-0.0588758	0.0205672	1	0.500995	1.07744e-79	9.32204e-76	-4.61655	NA
ENSMUSG00000002274	Metrn	1.9318	1.96306	1.34462	1.2016	1.09766	1.00954	2.04069	1.67095	1.89877	0.955982	1.03369	0.98208	Metrn	-0.679754	0.100138	-0.797829	1.05088e-05	0.0300656	0.477277	1	-0.157521	0.374556	1	-0.937438	9.90737e-10	3.74003e-06	-9.3615	NA
ENSMUSG00000002279	Lmf1	17.9281	18.4415	17.6579	22.0096	21.0656	21.8935	19.0957	18.2897	19.101	22.6176	22.9895	21.7578	Lmf1	0.267346	0.0641897	0.318151	2.24975e-11	9.29305e-08	0.121388	1	0.0513461	0.172499	1	0.254503	6.95379e-11	2.76622e-07	3.96486	NA
ENSMUSG00000002280	Narfl	19.511	19.6899	19.5351	37.2753	36.9093	37.2295	17.991	17.5449	17.5035	37.2741	37.92	37.6185	Narfl	0.924878	-0.147436	0.941586	4.61155e-184	4.82599e-180	0.000110567	0.950655	0.0178466	0.526297	1	1.09016	7.47755e-252	8.23951e-248	-7.39415	NA
ENSMUSG00000002289	Angptl4	1.082	0.71469	1.11205	0.0322478	0.0494319	0.0472831	0.718464	0.56193	0.637605	0.0322478	0.0322478	0.0473245	Angptl4	-6.20556	-0.625531	-4.69763	6.28618e-43	4.52731e-39	0.00172046	1	-0.847821	1	1	-6.42994	6.58648e-32	4.23313e-28	10.2792	NA
ENSMUSG00000002297	Dbf4	61.4513	65.1639	64.6874	21.7213	20.3095	20.5404	71.6833	70.96	71.4813	21.8016	21.9273	22.2704	Dbf4	-1.61343	0.16264	-1.5349	0	0	2.03138e-08	0.000209557	0.0768501	0.0487812	1	-1.69922	0	0	-10.4478	NA
ENSMUSG00000002307	Daxx	42.5557	45.14	40.0679	46.4699	44.161	44.5667	42.3601	41.5792	42.794	41.9698	43.1851	41.855	Daxx	0.0817986	-0.0117122	-0.00697302	0.0280532	1	0.758804	1	-0.0903093	0.0144597	1	0.00320167	0.935938	1	-0.273362	NA
ENSMUSG00000002308	Cd320	53.3365	54.9106	51.8294	44.4035	42.5801	44.0405	55.6325	57.3372	56.5323	45.4184	44.4142	42.9858	Cd320	-0.288553	0.0826326	-0.269274	4.37298e-20	2.32861e-16	0.00720451	1	0.018961	0.548112	1	-0.352225	7.02483e-30	4.39965e-26	-4.26254	NA
ENSMUSG00000002319	Ipo4	45.3384	46.8877	42.8256	34.456	32.2353	34.2826	47.6155	51.8749	50.3442	33.8871	35.1888	33.789	Ipo4	-0.419057	0.15003	-0.392003	1.49404e-25	8.82677e-22	0.000119612	1	0.0260236	0.521411	1	-0.543063	5.83028e-43	4.1809e-39	-3.61971	NA
ENSMUSG00000002320	Tm9sf1	64.5839	62.5007	61.9962	61.4312	60.4859	60.8198	64.4194	64.4217	64.1833	62.6614	65.1106	61.5301	Tm9sf1	-0.049157	0.0298143	0.00151251	0.0816165	1	0.291466	1	0.0508471	0.0687782	1	-0.0281243	0.31483	1	-0.943317	NA
ENSMUSG00000002325	Irf9	8.13036	7.78879	7.98955	6.82409	6.76842	6.76805	7.86516	7.77885	8.1205	6.8217	6.73885	6.09308	Irf9	-0.232705	-0.00888509	-0.284342	0.000104636	0.266822	0.893446	1	-0.0516578	0.410963	1	-0.275479	4.17841e-06	0.0120631	31.0047	NA
ENSMUSG00000002326	Gmpr2	5.29769	5.30869	4.86643	4.99798	5.18748	5.47502	5.87346	5.95807	6.35487	5.17437	5.7981	5.39955	Gmpr2	0.0189707	0.234285	0.0810739	0.819356	1	0.00111054	1	0.0633167	0.378713	1	-0.152002	0.029647	1	-0.64879	NA
ENSMUSG00000002329	Mdp1	13.0126	12.8488	12.6078	15.1858	15.3605	15.0224	12.5683	12.9764	13.6023	14.0576	14.72	13.5862	Mdp1	0.244356	0.0251771	0.138472	1.30013e-07	0.000438535	0.608267	1	-0.104959	0.0190642	1	0.114221	0.0141775	1	4.53671	NA
ENSMUSG00000002332	Dhrs1	49.7207	52.1309	49.022	38.781	38.7137	37.44	45.038	45.7835	46.1571	38.5982	38.5421	38.5985	Dhrs1	-0.393395	-0.139472	-0.381967	1.1826e-37	8.14694e-34	3.71316e-06	0.0351228	0.0106721	0.746337	1	-0.243251	3.10121e-15	1.44609e-11	1.74408	NA
ENSMUSG00000002342	Tmem161a	66.6334	64.0154	61.6805	87.3972	85.2482	85.9889	65.3065	59.936	64.0488	84.0767	82.9847	78.6422	Tmem161a	0.427592	-0.0230508	0.353459	6.92417e-34	4.56372e-30	0.525148	1	-0.0741546	0.0320899	1	0.376488	1.40381e-26	8.37651e-23	-16.333	NA
ENSMUSG00000002343	Armc6	11.1963	10.2522	11.3452	8.13761	7.88538	8.52718	11.7147	11.768	10.6596	9.91621	8.63551	8.12844	Armc6	-0.417709	0.058434	-0.301262	1.76209e-09	6.63602e-06	0.39017	1	0.118596	0.0924923	1	-0.35755	1.55814e-07	0.000513406	-6.11887	NA
ENSMUSG00000002345	Borcs8	17.0783	18.4748	17.0433	23.8838	22.6465	23.4121	17.2211	17.1807	17.7726	23.4335	23.126	21.9538	Borcs8	0.412466	-0.0117072	0.381878	3.29149e-22	1.83764e-18	0.802619	1	-0.0306315	0.458414	1	0.393543	1.80391e-20	9.63289e-17	-33.6154	NA
ENSMUSG00000002346	Slc25a42	10.9964	9.7196	10.2322	19.5748	17.6975	17.5333	8.53464	10.6424	9.68434	16.4439	17.087	16.692	Slc25a42	0.826285	-0.10072	0.700168	1.81196e-38	1.25695e-34	0.145724	1	-0.126106	0.0373001	1	0.800903	2.00611e-35	1.34229e-31	-7.95175	NA
ENSMUSG00000002365	Snx9	162.194	162.27	161.055	161.851	154.586	156.309	190.918	187.788	189.341	173.71	177.818	176.234	Snx9	-0.0383692	0.226508	0.120296	0.107159	1	8.68385e-22	1.03963e-17	0.158767	1.64559e-11	2.03017e-07	-0.106111	5.67213e-06	0.0161599	-0.468463	NA
ENSMUSG00000002372	Ranbp3	132.968	130.395	126.153	89.7359	87.5681	87.1767	124.639	128.265	131.731	88.1873	90.1465	86.6328	Ranbp3	-0.558702	-0.0182016	-0.555724	1.57754e-85	1.38871e-81	0.515779	1	0.00266732	0.929517	1	-0.537834	7.31548e-80	6.33228e-76	29.5487	NA
ENSMUSG00000002379	Ndufa11	16.0785	17.7258	16.0133	15.394	16.0135	15.9696	15.7985	17.8925	15.4521	16.8288	18.1947	15.0939	Ndufa11	-0.0726428	-0.0194924	0.00605334	0.266522	1	0.768512	1	0.0812122	0.209932	1	0.0280614	0.666616	1	-1.43961	NA
ENSMUSG00000002393	Nr2f6	29.2088	30.0597	28.4393	54.9757	48.2509	48.8668	27.1629	28.6682	28.7027	58.9357	59.8454	55.7105	Nr2f6	0.794954	-0.0532065	0.992071	1.46062e-68	1.21319e-64	0.266867	1	0.198134	4.57264e-06	0.054012	1.0463	2.66651e-119	2.55052e-115	-19.6648	NA
ENSMUSG00000002395	Use1	30.975	32.1403	29.1702	36.1059	37.3561	37.0792	26.3763	28.1054	28.6858	33.0096	33.6411	33.6231	Use1	0.260543	-0.150217	0.120859	4.79074e-12	2.03654e-08	0.000130906	1	-0.140588	0.00014189	1	0.270173	2.05695e-12	8.71323e-09	-1.79855	NA
ENSMUSG00000002396	Ocel1	8.41363	8.97058	8.82016	19.2865	18.3161	18.8865	8.09948	8.55682	8.45681	19.6616	19.6817	19.4661	Ocel1	1.11159	-0.061524	1.16675	8.21648e-133	8.08748e-129	0.273384	1	0.0573621	0.135826	1	1.23049	7.44803e-166	7.66477e-162	-20.0001	NA
ENSMUSG00000002409	Dyrk1b	17.7614	16.6772	16.8605	19.3666	19.0207	17.2627	12.6687	12.8439	12.4925	17.2445	18.043	15.6969	Dyrk1b	0.116387	-0.433561	-0.0107392	0.0299104	1	1.51656e-14	1.73903e-10	-0.125414	0.0182667	1	0.424537	3.09554e-14	1.3964e-10	-0.979186	NA
ENSMUSG00000002413	Braf	68.3497	67.7605	70.7675	156.966	153.572	153.618	74.2106	67.8646	67.042	139.593	143.283	151.96	Braf	1.16618	0.0155211	1.07104	3.63576e-228	3.94988e-224	0.68068	1	-0.0941092	0.00693747	1	1.05655	8.81137e-188	9.27221e-184	68.072	NA
ENSMUSG00000002416	Ndufb2	7.98039	8.22156	7.88987	13.3917	13.8311	13.985	8.01579	7.74574	7.46469	12.7952	12.8082	12.8474	Ndufb2	0.776929	-0.0529037	0.674686	5.42031e-56	4.23814e-52	0.362005	1	-0.100399	0.0235242	1	0.729439	3.89122e-48	2.90519e-44	-13.788	NA
ENSMUSG00000002428	Hltf	41.1727	40.2963	43.2243	61.6875	61.1217	63.4961	42.0254	39.6922	40.3726	60.814	62.6221	63.5353	Hltf	0.580065	-0.0305346	0.584819	1.60968e-71	1.35455e-67	0.375251	1	0.00478123	0.875394	1	0.615381	1.11103e-80	9.64376e-77	-20.1536	NA
ENSMUSG00000002455	Prpf6	144.765	145.209	146.021	240.422	244.167	245.152	132.623	131.129	130.369	223.838	222.473	226.243	Prpf6	0.743211	-0.145709	0.62531	4.7395e-257	5.22957e-253	1.43785e-10	1.56122e-06	-0.117764	2.10892e-08	0.000256276	0.771157	1.90102e-271	2.1147e-267	-5.29243	NA
ENSMUSG00000002458	Rgs19	56.1192	55.8427	54.0389	45.9733	47.426	48.4308	66.0931	69.6027	70.7918	49.6676	49.8614	47.3279	Rgs19	-0.226891	0.315029	-0.176981	1.37416e-11	5.72614e-08	3.59552e-22	4.31067e-18	0.0499411	0.138044	1	-0.49198	1.92055e-51	1.46499e-47	-1.5617	NA
ENSMUSG00000002475	Abhd3	0.132224	0.265277	0.331269	6.84011	7.009	6.81315	0.266566	0.297089	0.234034	6.72932	6.89058	6.62077	Abhd3	5.00912	0.148272	4.89646	3.19513e-301	3.60379e-297	0.737979	1	-0.0290773	0.633731	1	4.83205	1.24606e-292	1.40057e-288	32.589	NA
ENSMUSG00000002477	Snrpd1	92.0941	92.0122	95.0381	60.6302	65.0054	63.8419	96.3703	104.81	101.514	65.3403	64.7464	65.7516	Snrpd1	-0.559424	0.116923	-0.511213	1.08591e-65	8.91317e-62	0.000235923	1	0.0478751	0.152439	1	-0.628473	2.72918e-84	2.39376e-80	-5.37509	NA
ENSMUSG00000002486	Tchp	9.63001	9.15367	8.82016	7.41678	7.35268	7.65513	8.75222	9.69894	9.44892	7.09882	7.34578	6.99769	Tchp	-0.299802	0.0156483	-0.363774	3.94341e-07	0.001282	0.797102	1	-0.06594	0.291644	1	-0.381392	9.89422e-11	3.90822e-07	-24.3727	NA
ENSMUSG00000002489	Tiam1	56.1025	54.9772	56.7965	36.2981	32.3384	33.7864	61.9089	58.4793	57.1376	33.3175	35.5985	35.3268	Tiam1	-0.7128	0.0806744	-0.687947	3.12058e-71	2.62129e-67	0.0363003	1	0.0249932	0.545337	1	-0.768483	4.14031e-84	3.62816e-80	-9.52573	NA
ENSMUSG00000002496	Tsc2	173.408	173.073	173.996	196.035	194.642	192.529	166.565	164.863	165.749	187.273	194.584	190.074	Tsc2	0.164118	-0.0660978	0.13583	3.00207e-13	1.33622e-09	0.00373842	1	-0.0280643	0.207053	1	0.202152	2.92959e-19	1.52075e-15	-3.05837	NA
ENSMUSG00000002504	Slc9a3r2	37.5902	36.1351	35.0676	41.7765	40.5696	39.1239	28.9872	31.6642	30.9559	45.5262	44.9149	43.3024	Slc9a3r2	0.158732	-0.248174	0.298147	2.76529e-05	0.0753819	2.4897e-10	2.69162e-06	0.139313	0.000157856	1	0.546219	7.22357e-47	5.34111e-43	-2.20096	NA
ENSMUSG00000002524	Puf60	182.39	184.109	175.658	170.581	171.134	171.494	169.611	181.051	175.351	173.433	175.724	171.047	Puf60	-0.0791554	-0.0435797	-0.059422	0.00326865	1	0.105638	1	0.0195128	0.468081	1	-0.0160629	0.551401	1	0.368586	NA
ENSMUSG00000002546	Golga2	112.873	114.2	114.524	210.147	209.077	211.563	100.203	97.0634	97.6293	202.499	205.858	205.121	Golga2	0.885118	-0.212173	0.84471	0	0	1.05373e-18	1.2453e-14	-0.0402164	0.0620742	1	1.05708	0	0	-4.98213	NA
ENSMUSG00000002550	Uck1	51.287	51.5483	49.4539	73.397	70.8308	70.1267	49.1888	50.1865	50.1256	68.989	69.2529	68.782	Uck1	0.493332	-0.0266463	0.443224	4.07506e-70	3.40594e-66	0.366354	1	-0.0501087	0.0602134	1	0.46987	1.3441e-63	1.09168e-59	-17.6336	NA
ENSMUSG00000002578	Ikzf4	6.16415	7.20621	6.32831	8.77835	9.44914	9.4744	5.20398	4.76628	5.16097	7.4837	8.49895	8.52043	Ikzf4	0.493818	-0.382821	0.315666	2.3053e-12	9.9243e-09	9.4392e-07	0.00917774	-0.177242	0.00867801	1	0.699408	3.72187e-21	2.02358e-17	-1.82698	NA
ENSMUSG00000002580	Mien1	3.88135	3.57762	3.81986	12.3505	13.4359	13.143	3.81481	3.90555	4.60606	14.812	12.793	13.9631	Mien1	1.79516	0.128742	1.88015	1.02242e-123	9.88884e-120	0.165531	1	0.0950011	0.12923	1	1.76143	1.05424e-125	1.0204e-121	13.6819	NA
ENSMUSG00000002602	Axl	614.172	622.519	619.256	388.817	384.853	384.589	642.281	631.513	636.969	421.948	431.379	433.699	Axl	-0.680241	0.04199	-0.528195	3.37328e-224	3.65495e-220	0.0454959	1	0.15211	1.14045e-12	1.41222e-08	-0.570121	7.27276e-160	7.42913e-156	-13.5775	NA
ENSMUSG00000002603	Tgfb1	37.2736	38.1824	36.3966	95.1181	93.72	90.9505	37.5064	38.5004	39.5486	119.579	120.599	114.314	Tgfb1	1.3232	0.0470037	1.66403	0	0	0.182072	1	0.341727	1.58567e-32	1.99303e-28	1.61792	0	0	34.4212	NA
ENSMUSG00000002608	Ccdc97	33.6078	33.1057	33.2901	57.9391	56.6711	57.1813	31.1463	32.9553	32.9402	55.1176	53.8671	53.2982	Ccdc97	0.781314	-0.0433713	0.698346	3.18932e-152	3.22536e-148	0.188224	1	-0.0824393	0.00287402	1	0.742247	1.14797e-135	1.13431e-131	-17.1138	NA
ENSMUSG00000002617	Zfp40	8.46362	9.93598	9.51788	6.58381	7.31831	7.14393	9.48865	8.72234	9.70115	6.72932	6.16226	6.666	Zfp40	-0.409739	-0.000554478	-0.511278	3.60976e-09	1.34031e-05	1	1	-0.105848	0.145906	1	-0.515034	1.24643e-13	5.50922e-10	928.863	NA
ENSMUSG00000002625	Akap8l	30.0419	29.7435	28.7882	83.2003	83.083	80.5612	30.6609	30.5552	31.7126	80.6435	80.6177	77.0441	Akap8l	1.47928	0.0692626	1.42777	0	0	0.0523351	1	-0.0505416	0.0680489	1	1.35948	0	0	19.6279	NA
ENSMUSG00000002635	Pdcd2l	7.13059	7.37266	6.87652	7.28863	7.69636	7.97087	6.8442	7.8285	8.15413	7.66845	8.66586	7.61583	Pdcd2l	0.103683	0.0948887	0.161798	0.157051	1	0.197408	1	0.0608584	0.391386	1	0.0696524	0.331503	1	0.734043	NA
ENSMUSG00000002658	Gtf2f1	77.7975	76.0663	75.2694	77.4016	78.2199	76.2009	67.8505	71.6883	72.6247	74.7162	69.4957	70.4706	Gtf2f1	0.0166054	-0.111044	-0.0945597	0.599787	1	0.000521906	1	-0.110724	0.000463612	1	0.0169262	0.597135	1	-0.152427	NA
ENSMUSG00000002660	Clpp	52.3034	51.9644	51.2646	48.4081	49.0757	49.393	56.0844	60.9622	57.928	49.6522	47.5702	46.1519	Clpp	-0.0825781	0.170123	-0.118029	0.0147713	1	3.57631e-07	0.00353804	-0.0350638	0.303258	1	-0.287765	6.59745e-18	3.3106e-14	-1.69151	NA
ENSMUSG00000002661	Alkbh7	6.83066	6.54042	7.27522	12.5908	10.4458	11.9402	5.83998	6.5374	5.9513	12.9645	12.0647	12.0333	Alkbh7	0.764981	-0.17235	0.844593	1.15996e-27	7.08618e-24	0.0266665	1	0.0816999	0.205063	1	1.01904	8.77795e-48	6.54045e-44	-5.9126	NA
ENSMUSG00000002679	Med6	19.2778	20.5887	21.3292	17.989	19.2784	18.1949	18.8279	21.4513	19.8073	18.5839	17.8305	19.255	Med6	-0.143046	-0.0262853	-0.135995	0.00570572	1	0.612153	1	0.00630479	0.915795	1	-0.110457	0.031804	1	4.20222	NA
ENSMUSG00000002688	Prkd1	33.7744	34.2875	34.5526	23.4833	21.8045	22.6002	31.4141	29.562	30.6364	23.6645	23.5205	23.1298	Prkd1	-0.595861	-0.163892	-0.545339	2.40638e-63	1.95157e-59	1.69938e-06	0.0163463	0.0498579	0.181042	1	-0.382112	1.08926e-26	6.51266e-23	2.33149	NA
ENSMUSG00000002718	Cse1l	199.752	207.578	210.294	101.814	103.309	104.588	223.354	219.751	216.649	111.666	112.8	111.72	Cse1l	-0.995917	0.0952106	-0.877142	0	0	0.000106676	0.918584	0.118268	7.44077e-06	0.087563	-0.97286	0	0	-10.218	NA
ENSMUSG00000002728	Naa20	74.8315	75.0343	72.1961	60.1977	61.242	59.8125	83.4829	89.7637	87.1365	61.8147	62.1366	62.0729	Naa20	-0.293394	0.229827	-0.255254	7.66755e-23	4.32603e-19	2.05526e-15	2.3763e-11	0.0378278	0.211659	1	-0.485394	2.75864e-62	2.22677e-58	-2.11199	NA
ENSMUSG00000002731	Prkra	36.3904	37.0173	37.2604	30.8999	32.5961	32.1476	32.3012	35.074	33.4783	31.8703	30.6216	31.4973	Prkra	-0.210973	-0.13397	-0.235803	1.47657e-09	5.59177e-06	0.000119014	1	-0.0249752	0.480322	1	-0.101978	0.00381128	1	0.761202	NA
ENSMUSG00000002732	Fkbp7	7.86376	8.12169	7.22538	3.81261	4.39701	3.95645	7.21242	7.36503	7.85145	4.62013	4.29595	4.97741	Fkbp7	-0.939798	-0.0497162	-0.741256	3.90158e-35	2.6125e-31	0.47723	1	0.195845	0.0186934	1	-0.694246	5.17051e-21	2.80035e-17	13.9642	NA
ENSMUSG00000002733	Plekha3	76.6977	77.4978	75.1365	86.9006	87.1213	85.628	77.6919	81.7026	78.4597	91.836	88.9934	87.7334	Plekha3	0.179015	0.0527362	0.227678	1.09602e-10	4.38297e-07	0.0608887	1	0.0488181	0.0729702	1	0.175097	1.80096e-10	7.04354e-07	3.32025	NA
ENSMUSG00000002741	Ykt6	95.4933	97.1388	96.5664	113.78	111.901	114.436	104.12	104.711	105.617	115.33	118.49	116.123	Ykt6	0.234296	0.120781	0.275	4.34802e-23	2.45967e-19	4.54879e-07	0.00448328	0.0408612	0.0758607	1	0.154376	3.5752e-11	1.4358e-07	1.27815	NA
ENSMUSG00000002748	Baz1b	303.911	298.11	306.629	233.726	224.233	225.155	319.274	296.124	297.868	218.465	221.062	230.51	Baz1b	-0.411625	0.0073024	-0.43977	2.69557e-41	1.91817e-37	0.810591	1	-0.0278877	0.36429	1	-0.446815	2.04144e-48	1.527e-44	-61.1874	NA
ENSMUSG00000002763	Pex6	40.2729	39.9801	39.6526	73.1247	65.1944	68.0969	36.6026	37.3252	36.8414	69.574	69.4046	70.0786	Pex6	0.784545	-0.114401	0.802016	5.03017e-110	4.72635e-106	0.00232953	1	0.0179323	0.589651	1	0.916879	7.66688e-149	7.71825e-145	-8.01462	NA
ENSMUSG00000002767	Mrpl2	48.2377	49.5842	46.0816	41.6323	40.0884	41.3191	54.3438	55.3013	55.6579	42.7242	42.8968	41.252	Mrpl2	-0.225606	0.200146	-0.181282	2.06738e-12	8.91454e-09	1.34833e-10	1.46482e-06	0.0437146	0.174488	1	-0.382038	2.39788e-34	1.5874e-30	-1.9088	NA
ENSMUSG00000002768	Mea1	59.835	59.6378	56.6138	66.6692	69.8685	65.8416	61.6578	67.9143	66.9074	69.8666	65.6416	65.3747	Mea1	0.200437	0.158219	0.189859	1.63782e-07	0.000547852	3.93622e-05	0.349733	-0.0103475	0.782828	1	0.0318702	0.401734	1	0.20143	NA
ENSMUSG00000002771	Grin2d	1.36527	1.23068	1.47752	1.40984	1.69911	1.47563	1.27078	1.45577	1.09162	1.27929	1.762	1.46453	Grin2d	0.170537	-0.0947681	0.13706	0.253511	1	0.540521	1	-0.0212116	0.886072	1	0.244107	0.1072	1	-2.57584	NA
ENSMUSG00000002778	Kdelr1	85.6956	86.8189	85.6023	85.9875	87.4478	88.9959	80.0518	84.8641	85.0682	89.3112	85.7766	85.4267	Kdelr1	0.0240898	-0.0461866	0.0130774	0.406563	1	0.11211	1	-0.0108195	0.710511	1	0.059457	0.0391019	1	-1.28732	NA
ENSMUSG00000002781	Tmem143	14.3622	14.014	14.5348	8.34585	8.09159	8.06108	14.1917	15.2275	14.0227	8.80772	8.74173	8.82197	Tmem143	-0.811045	0.0180343	-0.702219	3.76756e-58	2.98278e-54	0.704877	1	0.106744	0.0556992	1	-0.72234	7.059e-49	5.29284e-45	-40.0536	NA
ENSMUSG00000002797	Ggct	12.2127	12.1498	12.3254	9.96372	10.7208	10.7674	9.40496	9.56652	9.9702	9.87002	10.3046	10.3899	Ggct	-0.222677	-0.343217	-0.263782	7.20205e-06	0.0210084	1.44679e-11	1.59855e-07	-0.041259	0.421223	1	0.0792827	0.130708	1	-0.230999	NA
ENSMUSG00000002803	Btbd6	5.34768	5.99113	5.81333	8.68224	8.55556	8.15129	5.70609	6.20635	6.22035	8.34586	8.13479	7.87213	Btbd6	0.56708	0.0806496	0.506938	2.67761e-19	1.39958e-15	0.247015	1	-0.0593871	0.309237	1	0.427046	8.96181e-12	3.70123e-08	5.29508	NA
ENSMUSG00000002804	Nudt14	8.73022	7.9053	7.55763	8.98659	8.83051	8.51214	8.18316	9.51687	9.61708	9.28499	10.168	9.83211	Nudt14	0.121939	0.175949	0.277198	0.0784927	1	0.0111421	1	0.154822	0.0205549	1	0.10081	0.132027	1	0.572951	NA
ENSMUSG00000002808	Epdr1	97.7595	99.752	100.819	49.2571	48.7148	45.108	97.2407	101.599	99.7481	48.6053	48.9358	51.67	Epdr1	-1.06148	0.00126181	-0.999984	9.57104e-227	1.03875e-222	0.970307	1	0.0615752	0.0791829	1	-1.00116	2.69436e-205	2.88e-201	-793.432	NA
ENSMUSG00000002812	Flii	85.4957	85.7204	84.1902	107.548	101.504	102.588	80.5204	77.9452	80.2758	98.1328	99.2505	97.669	Flii	0.287312	-0.0974251	0.20819	1.61378e-26	9.67621e-23	0.000436826	1	-0.0790633	0.00283501	1	0.305674	1.93577e-29	1.20618e-25	-3.13753	NA
ENSMUSG00000002814	Top3a	16.4118	16.4608	16.9104	12.3345	11.0644	10.8727	15.6646	14.9627	15.8052	10.4551	11.2453	10.9779	Top3a	-0.540149	-0.100865	-0.607847	4.36174e-27	2.64147e-23	0.0371576	1	-0.0683505	0.200656	1	-0.507636	1.17582e-23	6.68574e-20	5.03283	NA
ENSMUSG00000002820	Atg4d	13.2958	12.7823	11.9433	28.0646	27.7846	27.4115	11.7984	12.2977	12.0553	27.3594	27.4808	27.0346	Atg4d	1.13248	-0.0727811	1.10798	4.32407e-182	4.51952e-178	0.128599	1	-0.023991	0.485919	1	1.18127	3.69816e-196	3.91672e-192	-16.2305	NA
ENSMUSG00000002825	Qtrt1	10.0133	10.2689	10.199	6.21539	5.97795	5.94111	11.5975	12.2811	13.6023	5.62084	6.26848	6.78661	Qtrt1	-0.752221	0.298904	-0.710936	1.73353e-26	1.03925e-22	3.86603e-06	0.0365379	0.0433507	0.579131	1	-1.00778	2.36845e-50	1.79434e-46	-3.37159	NA
ENSMUSG00000002833	Hdgfl2	110.623	110.954	109.092	117.88	117.915	116.029	107.149	109.743	110.83	112.528	111.966	115.083	Hdgfl2	0.0893272	-0.0129229	0.0382816	0.000202175	0.497147	0.596479	1	-0.0509367	0.0322416	1	0.0513134	0.033035	1	-3.97072	NA
ENSMUSG00000002835	Chaf1a	88.3783	87.2517	87.0974	28.4811	28.0767	27.216	88.3533	86.4532	89.5747	30.1152	29.0588	29.7484	Chaf1a	-1.65071	0.00900321	-1.56308	0	0	0.723217	1	0.0867297	0.0103288	1	-1.57299	0	0	-174.714	NA
ENSMUSG00000002844	Adprh	74.8648	75.1342	71.7476	45.3326	46.5324	48.085	69.1225	75.4126	73.3646	48.5283	48.3896	46.2574	Adprh	-0.663971	-0.0251991	-0.63116	1.05737e-79	9.15362e-76	0.461479	1	0.032454	0.368645	1	-0.606318	2.4708e-67	2.0389e-63	24.0611	NA
ENSMUSG00000002845	Tmem39a	46.5881	48.0362	46.3806	63.5616	61.6716	59.7974	47.7327	48.5644	48.3768	65.2941	66.5824	62.1784	Tmem39a	0.391905	0.0370988	0.460301	5.16958e-34	3.41554e-30	0.266359	1	0.0690079	0.0266026	1	0.423814	2.36972e-40	1.65667e-36	11.4239	NA
ENSMUSG00000002846	Timmdc1	24.3099	22.3864	22.5419	28.6413	28.5063	28.2835	26.5102	30.9855	28.7699	31.7471	31.4106	30.5324	Timmdc1	0.303483	0.317767	0.437148	1.08906e-10	4.35622e-07	1.60445e-11	1.77115e-07	0.133299	0.00330071	1	0.119014	0.00883931	1	0.374532	NA
ENSMUSG00000002847	Pla1a	2.21507	1.84655	1.90944	5.49456	4.89535	5.49005	1.12015	1.07506	1.22615	4.09668	3.73454	3.54512	Pla1a	1.42744	-0.820415	0.931962	1.74147e-48	1.30001e-44	1.16199e-09	1.23763e-05	-0.487409	9.64073e-09	0.000117434	1.76052	9.41176e-52	7.19341e-48	-2.14589	NA
ENSMUSG00000002870	Mcm2	244.592	239.486	235.412	100.933	96.3492	100.272	271.406	271.064	271.636	107.894	109.568	106.655	Mcm2	-1.27365	0.178265	-1.15037	0	0	6.37209e-14	7.25972e-10	0.122967	2.49724e-06	0.0296498	-1.32895	0	0	-7.45491	NA
ENSMUSG00000002871	Tpra1	34.1576	35.6524	34.7852	72.4359	70.1262	73.0886	37.339	39.5763	38.3716	66.6643	65.9451	64.5907	Tpra1	1.04505	0.140613	0.914942	3.78508e-259	4.18024e-255	2.49401e-05	0.224786	-0.129682	4.34794e-06	0.0513752	0.774752	1.71445e-144	1.71565e-140	5.50982	NA
ENSMUSG00000002881	Nab1	100.159	103.763	102.547	66.4289	63.6994	66.6235	106.446	106.565	104.305	63.9855	61.5752	64.847	Nab1	-0.639019	0.0502085	-0.686841	1.9685e-116	1.87539e-112	0.0623339	1	-0.0478924	0.100684	1	-0.73712	9.78215e-156	9.92693e-152	-14.6812	NA
ENSMUSG00000002885	Adgre5	2.29839	1.91313	2.19185	1.07345	1.2695	1.22003	2.10763	2.25029	1.89877	0.955982	1.41302	1.07254	Adgre5	-0.86352	-0.033457	-0.911277	5.94003e-10	2.29463e-06	0.829929	1	-0.0493902	0.763841	1	-0.879479	2.58181e-10	1.00097e-06	26.2869	NA
ENSMUSG00000002897	Il17ra	30.0086	30.6922	30.8149	45.0122	43.1644	43.2135	31.7823	30.489	30.3001	40.8151	41.6223	42.8953	Il17ra	0.522231	0.0165384	0.453468	3.44861e-57	2.71509e-53	0.639476	1	-0.068056	0.0285225	1	0.437637	1.02106e-40	7.16682e-37	26.4618	NA
ENSMUSG00000002900	Lamb1	305.944	300.973	302.775	204.989	196.515	197.069	339.107	325.423	324.891	212.245	213.339	219.609	Lamb1	-0.603898	0.121213	-0.495778	2.93247e-120	2.81928e-116	1.9671e-06	0.0188724	0.108215	3.38161e-05	0.391793	-0.616897	3.92861e-127	3.81625e-123	-5.08935	NA
ENSMUSG00000002908	Kcnn1	1.24863	1.03094	1.52736	0.480766	0.547771	0.483306	1.06994	1.3068	1.47838	0.401742	0.54814	0.529779	Kcnn1	-1.39065	0.0182654	-1.35831	1.80275e-12	7.79688e-09	0.968551	1	-0.027905	1	1	-1.43692	1.96314e-13	8.61819e-10	-78.6687	NA
ENSMUSG00000002910	Arrdc2	2.74828	2.27931	2.00911	3.05974	3.24568	2.97916	1.97374	2.08477	1.96603	2.54173	3.02139	2.98728	Arrdc2	0.402742	-0.226846	0.288722	0.000250498	0.605061	0.0639852	1	-0.11753	0.267609	1	0.512078	6.72255e-06	0.0189845	-2.25738	NA
ENSMUSG00000002948	Map2k7	33.8577	34.7036	34.2204	46.9985	47.5807	46.5814	29.9747	30.5055	32.7384	47.0195	47.6309	47.1771	Map2k7	0.457743	-0.141164	0.464606	2.90229e-47	2.15263e-43	3.28777e-05	0.293762	0.00717486	0.820082	1	0.606083	2.00662e-80	1.74094e-76	-4.29345	NA
ENSMUSG00000002949	Timm44	56.9023	57.6737	56.5806	64.2344	60.9671	61.0153	55.3982	58.7938	58.4324	60.5215	57.615	56.977	Timm44	0.121764	0.0123602	0.0325207	0.000172945	0.429421	0.709204	1	-0.0888881	0.00566154	1	0.0205158	0.527723	1	1.65983	NA
ENSMUSG00000002957	Ap2a2	115.889	117.978	119.508	129.43	127.195	124.524	130.547	131.41	130.756	130.541	133.254	132.481	Ap2a2	0.108978	0.152313	0.165365	6.12648e-06	0.017969	2.75908e-10	2.98008e-06	0.0563852	0.0178487	1	0.0130503	0.584651	1	0.0856809	NA
ENSMUSG00000002963	Pnkp	18.378	18.6246	19.8009	31.0441	29.4343	29.7419	21.5728	21.534	21.5224	29.7919	29.5292	28.0598	Pnkp	0.668496	0.186446	0.621604	2.59509e-65	2.12486e-61	7.95844e-06	0.0739976	-0.046542	0.204992	1	0.435509	8.61962e-30	5.39071e-26	2.33585	NA
ENSMUSG00000002968	Med25	80.98	85.4208	81.4492	105.034	96.0742	100.077	70.177	72.5325	73.1124	98.6563	97.9608	96.493	Med25	0.281584	-0.199702	0.242329	1.46669e-18	7.53294e-15	1.133e-09	1.20721e-05	-0.0395499	0.212281	1	0.441737	1.14718e-42	8.20004e-39	-2.21198	NA
ENSMUSG00000002981	Clptm1	146.815	146.924	142.948	223.57	220.711	221.772	139.184	142.07	142.426	228.225	227.253	220.906	Clptm1	0.609181	-0.0436255	0.631211	8.25981e-148	8.30193e-144	0.0720835	1	0.0221485	0.332723	1	0.674956	2.21122e-181	2.31316e-177	-15.4716	NA
ENSMUSG00000002983	Relb	47.038	46.5715	45.9321	58.7721	52.8046	55.7079	43.3978	43.5655	42.6427	45.4646	47.7978	46.0313	Relb	0.262375	-0.106597	-0.00282386	7.5937e-14	3.44906e-10	0.00312769	1	-0.264891	2.68269e-14	3.33485e-10	0.104082	0.0036356	1	-0.976405	NA
ENSMUSG00000002984	Tomm40	69.666	70.6733	67.1294	48.6324	46.7043	49.0172	73.0055	78.3755	77.1985	49.2519	51.0146	50.69	Tomm40	-0.522921	0.139909	-0.458592	4.92317e-57	3.87059e-53	1.0598e-05	0.0978091	0.0639982	0.0563801	1	-0.598832	1.11307e-76	9.52347e-73	-4.28017	NA
ENSMUSG00000002985	Apoe	4.46455	4.65954	4.05243	1.93845	1.76784	1.95676	3.98218	3.75657	3.83255	2.2954	2.39928	2.05253	Apoe	-1.22861	-0.18884	-0.966247	4.2251e-37	2.89039e-33	0.0240664	1	0.253159	0.0217218	1	-0.786632	7.63472e-17	3.73567e-13	4.16559	NA
ENSMUSG00000002996	Hbp1	16.3118	15.1958	16.412	22.2019	21.8732	23.0964	14.8612	14.5985	13.5519	19.677	21.2749	20.2501	Hbp1	0.488915	-0.156068	0.353085	2.367e-26	1.41523e-22	0.00165356	1	-0.135248	0.00220239	1	0.509737	2.37645e-27	1.43704e-23	-3.26613	NA
ENSMUSG00000002997	Prkar2b	185.806	186.905	189.861	20.2957	20.4642	21.0064	160.222	157.364	156.517	21.1088	20.4707	20.5516	Prkar2b	-3.18843	-0.246882	-3.17872	0	0	5.01228e-27	6.08641e-23	0.00778597	0.837771	1	-2.93376	0	0	11.8832	NA
ENSMUSG00000003031	Cdkn1b	78.114	76.2494	77.8111	90.0082	88.9084	87.9735	71.767	66.408	70.5396	83.9843	81.7253	84.9442	Cdkn1b	0.201014	-0.153842	0.110379	4.79716e-12	2.03879e-08	2.46872e-07	0.00245761	-0.0904813	0.0016215	1	0.264375	2.38742e-19	1.24217e-15	-1.71848	NA
ENSMUSG00000003032	Klf4	8.8302	9.81947	9.40159	3.12382	2.98791	3.38511	20.0162	21.6002	20.4294	3.40388	3.43107	2.70082	Klf4	-1.56845	1.14791	-1.56392	5.98862e-92	5.37299e-88	2.75536e-89	3.45935e-85	0.00190179	0.979368	1	-2.71448	0	0	-2.36471	CBP.dependent
ENSMUSG00000003033	Ap1m1	54.203	52.4471	51.8461	45.9092	44.1267	44.9276	54.076	55.6489	56.65	44.9719	46.0832	42.3676	Ap1m1	-0.231749	0.0700292	-0.24908	4.91111e-12	2.08624e-08	0.0341141	1	-0.0169298	0.624138	1	-0.318709	9.40161e-22	5.16712e-18	-4.55108	NA
ENSMUSG00000003037	Rab8a	67.3832	71.0895	68.0597	68.7997	72.4633	71.7054	66.1601	69.4868	68.1182	74.085	69.4501	71.3451	Rab8a	0.0441649	-0.019432	0.0570488	0.169608	1	0.549823	1	0.0129497	0.686865	1	0.0765466	0.0168683	1	-3.93921	NA
ENSMUSG00000003038	Hmgn2	271.786	273.525	269.451	94.9259	96.0742	93.7621	255.824	263.334	264.136	102.367	98.7801	99.3727	Hmgn2	-1.51719	-0.0568261	-1.43907	0	0	0.0134735	1	0.077939	0.00255468	1	-1.38242	0	0	24.3273	NA
ENSMUSG00000003039	Fam32a	84.6625	83.5898	84.8215	83.2964	82.8253	83.8539	75.1478	78.69	77.3162	85.6932	82.1654	84.8538	Fam32a	-0.017624	-0.130709	-0.00226334	0.501718	1	8.39964e-07	0.00818544	0.0155229	0.550192	1	0.128608	1.01805e-06	0.00312906	-0.983926	NA
ENSMUSG00000003062	Stard3nl	45.4883	47.5036	46.6132	33.8954	34.2802	34.2676	53.3061	52.7853	52.9842	35.088	35.6592	35.5077	Stard3nl	-0.446892	0.188453	-0.393629	1.71063e-53	1.31855e-49	4.71694e-12	5.24901e-08	0.0528169	0.0798735	1	-0.582529	1.59179e-96	1.44709e-92	-3.09111	NA
ENSMUSG00000003068	Stk11	102.608	101.766	98.3771	87.3171	81.2959	82.0797	91.7342	94.4646	95.3088	82.0137	83.4703	81.0092	Stk11	-0.27218	-0.104984	-0.296457	7.43201e-20	3.9412e-16	0.000408791	1	-0.0245057	0.41824	1	-0.191701	1.50734e-10	5.91329e-07	1.826	NA
ENSMUSG00000003070	Efna2	8.81353	8.52116	8.10583	2.09863	2.36929	1.7162	8.04926	8.40784	8.7763	3.21913	2.79379	2.48975	Efna2	-2.06514	-0.0118566	-1.58828	4.92198e-116	4.68523e-112	0.878256	1	0.472721	1.38316e-05	0.161815	-1.5806	3.61891e-79	3.12457e-75	133.31	NA
ENSMUSG00000003072	Atp5d	112.406	116.014	105.886	94.6055	91.9844	95.1003	101.894	113.219	113.1	98.3022	98.4615	93.2967	Atp5d	-0.24696	-0.0265275	-0.204235	2.79456e-10	1.09239e-06	0.497086	1	0.0420592	0.283173	1	-0.178373	4.98577e-06	0.0142792	6.72409	NA
ENSMUSG00000003099	Ppp5c	69.0662	67.877	67.2124	51.5638	50.1755	52.7008	69.5912	72.7973	72.7424	54.2862	53.5485	54.0672	Ppp5c	-0.402041	0.0756071	-0.334481	1.50899e-44	1.10066e-40	0.00670359	1	0.0673164	0.0208905	1	-0.410332	8.56316e-48	6.38127e-44	-5.42717	NA
ENSMUSG00000003119	Cdk12	72.0488	72.0549	73.8574	87.3972	86.348	84.9063	80.42	75.065	71.6662	75.2088	73.4711	79.9689	Cdk12	0.246932	0.0596192	0.0682352	2.47255e-11	1.01894e-07	0.110754	1	-0.177795	1.28577e-06	0.0153341	0.00951724	0.799614	1	0.159634	NA
ENSMUSG00000003123	Lipe	2.515	2.39583	2.57393	3.76456	3.60654	3.71589	2.19132	2.3165	1.86514	3.60402	3.87109	3.75619	Lipe	0.573411	-0.234384	0.585521	3.92283e-10	1.5252e-06	0.0285837	1	0.0181893	0.8221	1	0.826003	1.39407e-18	7.11393e-15	-3.52415	NA
ENSMUSG00000003131	Pafah1b2	188.305	192.115	192.22	183.652	191.773	189.672	192.106	191.065	191.712	195.14	192.824	192.17	Pafah1b2	-0.019227	0.00563505	0.0187937	0.410216	1	0.809919	1	0.0379688	0.101122	1	0.0131067	0.572125	1	2.32593	NA
ENSMUSG00000003135	Cnot11	37.8568	37.9328	39.0546	41.2799	38.0435	38.2369	35.7155	35.9513	36.505	41.5695	40.8029	40.4077	Cnot11	0.033862	-0.0864581	0.0964467	0.319312	1	0.0119091	1	0.0625269	0.0591859	1	0.182847	5.52069e-08	0.000188145	-2.11486	NA
ENSMUSG00000003153	Slc2a3	10.3132	9.98592	10.4814	5.09409	5.03282	5.11417	9.22085	8.50716	8.74267	5.11279	4.61459	4.7211	Slc2a3	-1.01795	-0.21847	-1.09221	1.07687e-64	8.79589e-61	6.91683e-05	0.603977	-0.0784223	0.277799	1	-0.877911	4.52935e-44	3.27246e-40	4.01846	NA
ENSMUSG00000003154	Foxj2	37.4069	37.8495	36.0477	56.0489	52.3579	53.197	36.5356	34.9416	35.5634	52.1617	50.7111	51.685	Foxj2	0.538578	-0.0564349	0.47385	8.51513e-61	6.83169e-57	0.10489	1	-0.0646269	0.0394778	1	0.530387	1.81696e-58	1.44139e-54	-9.39821	NA
ENSMUSG00000003161	Sri	48.8375	48.9684	49.5868	43.955	44.5906	45.0178	44.2848	45.5849	44.9632	47.62	47.7523	47.1017	Sri	-0.142048	-0.128532	-0.0489597	2.00189e-07	0.000665428	2.8995e-06	0.0275742	0.093016	0.000596221	1	0.0794995	0.0035459	1	-0.618521	NA
ENSMUSG00000003166	Dgcr2	76.2978	78.1636	75.7844	86.8045	82.6706	88.6802	75.5495	79.1535	79.8722	87.6331	88.0526	88.7587	Dgcr2	0.165801	0.026895	0.199897	3.07485e-08	0.000108112	0.374891	1	0.0340822	0.242322	1	0.172988	5.60658e-09	2.03687e-05	6.432	NA
ENSMUSG00000003184	Irf3	21.7439	21.1547	21.9273	44.868	41.0335	41.274	19.012	20.8719	19.8745	41.4309	40.8181	38.4175	Irf3	0.973262	-0.117469	0.895791	2.69244e-112	2.54247e-108	0.0132377	1	-0.0760585	0.0617853	1	1.01468	1.22396e-119	1.17133e-115	-8.6378	NA
ENSMUSG00000003190	Bcl2l12	6.33078	6.62364	6.97619	3.20391	3.21131	2.91902	5.3044	4.91525	5.34594	3.11136	3.1276	2.79128	Bcl2l12	-1.10459	-0.358815	-1.14297	2.21961e-45	1.62742e-41	3.77728e-07	0.00373309	-0.0459978	0.620775	1	-0.791779	3.71639e-22	2.05814e-18	2.20665	NA
ENSMUSG00000003198	Zfp959	9.34674	9.48657	8.62081	9.24289	8.83051	8.67753	8.73548	8.93753	9.11261	8.45363	8.68103	9.56072	Zfp959	-0.0378721	-0.0356661	-0.0412057	0.53693	1	0.562496	1	-0.00224611	0.97581	1	-0.00445198	0.948824	1	0.124824	NA
ENSMUSG00000003199	Mpnd	59.0685	59.7043	59.3216	44.5957	44.0407	42.4016	57.4736	59.4394	58.5165	46.1728	45.4611	45.6393	Mpnd	-0.443621	-0.0217169	-0.37561	4.69162e-56	3.66932e-52	0.426698	1	0.0677688	0.0196879	1	-0.354136	3.48898e-37	2.37425e-33	16.3069	NA
ENSMUSG00000003200	Sh3gl1	96.5264	92.395	92.297	111.745	109.701	109.895	92.9727	97.7586	95.6956	119.132	117.367	112.881	Sh3gl1	0.236728	0.0265285	0.313056	1.1463e-16	5.6157e-13	0.360868	1	0.0764231	0.00633572	1	0.286622	4.69445e-24	2.68616e-20	10.8043	NA
ENSMUSG00000003208	Yju2	8.41363	8.98722	7.80681	8.71428	8.10878	8.7527	8.80243	8.7389	8.96127	8.36125	8.31687	8.64105	Yju2	0.0229033	0.0725091	0.00854337	0.72334	1	0.228147	1	-0.0163562	0.802151	1	-0.0659626	0.264162	1	-0.909714	NA
ENSMUSG00000003226	Ranbp2	146.815	143.212	148.463	236.033	226.742	233.365	160.406	132.784	137.129	218.634	218.528	239.918	Ranbp2	0.66698	-0.0271632	0.62554	1.39314e-40	9.85092e-37	0.589158	1	-0.0400786	0.418871	1	0.654065	4.27273e-39	2.95972e-35	-24.079	NA
ENSMUSG00000003228	Grk5	27.3759	26.3312	27.426	32.6459	33.0773	32.1626	25.2716	24.0169	25.6591	31.2391	30.7734	31.1656	Grk5	0.270498	-0.114737	0.199923	9.73039e-16	4.65502e-12	0.00128947	1	-0.0706131	0.0294794	1	0.314623	3.61331e-20	1.91794e-16	-2.74212	NA
ENSMUSG00000003233	Dvl3	73.7817	71.3724	74.9372	81.7266	77.292	76.3663	66.0597	67.8315	66.1339	75.3628	75.3829	77.3456	Dvl3	0.0968573	-0.137946	0.0516989	0.00121999	1	5.99753e-06	0.0561548	-0.0452971	0.126512	1	0.189506	3.29551e-10	1.27339e-06	-1.37377	NA
ENSMUSG00000003234	Abcf3	62.0511	62.8502	61.7138	87.6855	86.2965	85.7634	58.2435	60.6643	60.6353	83.7534	85.2455	84.4919	Abcf3	0.477159	-0.0557379	0.441873	9.60158e-77	8.23719e-73	0.0399011	1	-0.0350774	0.15502	1	0.49782	5.62327e-83	4.91418e-79	-8.93144	NA
ENSMUSG00000003235	Eif2b5	77.7641	83.2236	81.5655	75.2071	74.7316	74.5771	85.0059	88.8533	86.3461	73.269	74.7001	73.5312	Eif2b5	-0.111558	0.101423	-0.130463	9.57498e-05	0.244641	0.000343146	1	-0.0194812	0.497187	1	-0.232463	2.16824e-16	1.04444e-12	-2.29201	NA
ENSMUSG00000003269	Cyth2	40.8561	42.2937	40.3005	55.1839	51.7392	55.0764	39.4813	42.7048	41.9701	53.2393	57.2204	53.0419	Cyth2	0.392914	0.00828708	0.404788	1.63923e-24	9.50427e-21	0.837877	1	0.0127493	0.72965	1	0.397377	2.7403e-25	1.59979e-21	47.9514	NA
ENSMUSG00000003273	Car11	4.71449	4.24342	4.50096	2.25882	2.00842	2.13719	2.92775	2.87929	3.00859	2.15684	2.41446	2.47467	Car11	-1.08036	-0.615701	-0.934902	3.16902e-32	2.05004e-28	7.43668e-13	8.37371e-09	0.138448	0.188926	1	-0.326216	0.000830446	1	0.529829	NA
ENSMUSG00000003282	Plag1	9.51337	9.83611	10.1491	14.577	14.0717	13.7745	11.7984	8.78855	8.97809	13.1339	12.2316	13.5711	Plag1	0.525377	0.00310052	0.399633	2.53011e-11	1.0419e-07	0.976857	1	-0.123823	0.106957	1	0.398456	4.62841e-07	0.00146767	128.512	NA
ENSMUSG00000003299	Mrpl4	39.2231	40.6792	39.8187	43.138	41.1194	40.853	40.0002	43.1848	44.711	40.615	42.1837	38.9452	Mrpl4	0.0635247	0.0953474	0.0235673	0.113359	1	0.0175574	1	-0.0393792	0.322881	1	-0.071202	0.0737861	1	-0.746764	NA
ENSMUSG00000003308	Keap1	65.567	67.2944	63.7903	75.143	70.9854	70.5928	60.2185	58.3304	59.6095	75.917	78.8424	72.8377	Keap1	0.140242	-0.142578	0.210429	3.07434e-05	0.0833761	3.15737e-05	0.282459	0.0706628	0.0328758	1	0.353483	8.4302e-26	4.97635e-22	-2.47923	NA
ENSMUSG00000003316	Glg1	417.435	414.99	421.57	432.868	424.737	418.855	429.353	384.333	381.677	428.291	432.547	457.776	Glg1	0.0256029	-0.0690931	0.0718969	0.484696	1	0.0595838	1	0.0469039	0.200006	1	0.1416	0.000110592	0.267742	-2.04941	NA
ENSMUSG00000003344	Btbd2	46.2548	46.7046	44.4868	61.6394	58.5613	57.061	35.3473	38.1362	37.8839	58.3661	61.4538	60.0978	Btbd2	0.367016	-0.303708	0.388466	1.34027e-24	7.78297e-21	6.07649e-16	7.05298e-12	0.0217478	0.537365	1	0.692473	5.97652e-81	5.19419e-77	-2.28006	NA
ENSMUSG00000003345	Csnk1g2	151.63	151.135	147.018	127.764	123.844	121.893	141.142	147.466	145.923	142.364	144.3	140.592	Csnk1g2	-0.268286	-0.0497564	-0.0740699	2.4032e-24	1.38905e-20	0.0574165	1	0.194142	1.56511e-13	1.94214e-09	-0.024388	0.351571	1	0.490147	NA
ENSMUSG00000003346	Abhd17a	78.5473	79.7615	74.688	96.8	91.4345	89.7327	65.5743	72.4828	73.5327	99.0874	100.373	94.8647	Abhd17a	0.254629	-0.139078	0.337249	1.5934e-10	6.30826e-07	0.000572215	1	0.0825744	0.0357837	1	0.476281	6.05161e-33	3.94262e-29	-3.42456	NA
ENSMUSG00000003348	Mob3a	11.3629	10.8348	10.498	7.19252	6.59658	6.57259	10.8946	9.93068	10.4242	7.71464	7.8465	7.61583	Mob3a	-0.685679	-0.0656012	-0.495753	8.56738e-32	5.50026e-28	0.235571	1	0.187637	0.00251405	1	-0.432445	4.00765e-14	1.80024e-10	6.59203	NA
ENSMUSG00000003352	Cacnb3	73.9317	76.5989	75.9007	42.5293	43.0613	40.9733	66.5785	70.48	68.5385	45.0951	44.8542	41.7796	Cacnb3	-0.840347	-0.139268	-0.782206	1.82495e-141	1.82002e-137	1.33641e-05	0.122629	0.0582879	0.0956585	1	-0.642791	1.39186e-83	1.2183e-79	4.61549	NA
ENSMUSG00000003355	Fkbp11	26.3095	27.6961	27.4758	19.5748	20.361	19.3075	33.1547	36.4975	36.3537	21.3243	22.1398	21.5316	Fkbp11	-0.461398	0.380008	-0.325943	1.83979e-26	1.1024e-22	7.17783e-21	8.56459e-17	0.1349	0.00239141	1	-0.706509	2.56714e-66	2.10762e-62	-1.85919	NA
ENSMUSG00000003360	Ddx23	167.01	168.046	167.136	148.732	144.327	141.95	163.67	164.813	163.025	144.335	143.101	143.246	Ddx23	-0.207366	-0.0310187	-0.22162	3.16819e-19	1.65158e-15	0.177934	1	-0.0143042	0.537726	1	-0.190651	1.53452e-16	7.44089e-13	6.14633	NA
ENSMUSG00000003363	Pld3	119.621	117.129	114.79	373.023	368.528	371.975	109.392	112.027	109.215	364.892	367.848	357.245	Pld3	1.66367	-0.0884368	1.63264	0	0	0.000571566	1	-0.0308751	0.173789	1	1.72123	0	0	-19.4629	NA
ENSMUSG00000003378	Grik5	124.853	125.402	121.784	108.189	98.5315	97.13	97.9771	99.2152	98.941	99.9495	100.692	97.9253	Grik5	-0.292225	-0.329289	-0.31738	2.95022e-19	1.53972e-15	7.02433e-24	8.45799e-20	-0.0252736	0.441468	1	0.0117903	0.721446	1	-0.0358054	NA
ENSMUSG00000003380	Rabac1	45.1384	44.1247	43.3904	75.0789	69.5591	71.9008	40.4855	47.1408	45.2491	73.0534	71.9689	68.1186	Rabac1	0.707549	0.00249797	0.683686	3.52739e-59	2.80851e-55	0.959572	1	-0.023077	0.58962	1	0.681974	2.78825e-55	2.17372e-51	273.012	NA
ENSMUSG00000003382	Etv3	31.125	30.3926	31.5956	61.0948	56.293	57.6023	31.5313	32.0118	31.679	54.6403	53.5789	55.5899	Etv3	0.911175	0.032359	0.814978	4.20362e-160	4.29263e-156	0.382521	1	-0.0956009	0.00254301	1	0.783217	1.50616e-118	1.43839e-114	24.204	NA
ENSMUSG00000003402	Prkcsh	244.392	245.412	238.02	264.914	253.756	247.017	225.965	233.854	233.28	267.423	259.526	258.99	Prkcsh	0.0730891	-0.0705301	0.110803	0.00831498	1	0.0112588	1	0.0377342	0.171783	1	0.181353	5.76336e-11	2.29785e-07	-2.57129	NA
ENSMUSG00000003411	Rab3b	1.59855	1.51365	1.44429	0.496784	0.255641	0.332953	0.885834	1.05851	0.990731	0.293973	0.214327	0.213168	Rab3b	-2.15906	-0.650329	-2.67448	3.07459e-30	1.9456e-26	1.51404e-05	0.138459	-0.666792	0.0327466	1	-2.17554	4.83926e-21	2.62288e-17	3.3453	NA
ENSMUSG00000003420	Fcgrt	71.299	70.1906	66.9799	41.1838	41.1366	41.3341	55.3647	57.4696	57.4067	43.4016	43.9741	40.86	Fcgrt	-0.753866	-0.292366	-0.701265	7.3952e-118	7.06907e-114	4.43365e-20	5.27206e-16	0.0523456	0.125514	1	-0.409155	3.8476e-35	2.56481e-31	1.39946	NA
ENSMUSG00000003421	Nosip	27.8924	27.6628	26.479	24.8289	24.4509	25.0058	25.0708	25.7218	25.7095	24.2957	23.8543	22.0292	Nosip	-0.142862	-0.100804	-0.226103	0.000228074	0.554905	0.00958792	1	-0.0828341	0.0357189	1	-0.124892	0.00149737	1	1.23897	NA
ENSMUSG00000003423	Pih1d1	25.5763	24.8998	24.037	16.227	15.0512	14.857	22.1585	24.2652	23.4394	14.966	16.4801	15.3653	Pih1d1	-0.69287	-0.0929605	-0.671372	1.05371e-47	7.83224e-44	0.0426703	1	0.0213445	0.680848	1	-0.578566	8.7916e-34	5.78839e-30	6.22379	NA
ENSMUSG00000003429	Rps11	113.722	116.097	112.348	60.0856	59.094	58.7299	115.149	130.731	125.577	62.3227	61.7876	61.4095	Rps11	-0.943956	0.118565	-0.883025	1.23058e-150	1.24227e-146	0.00067633	1	0.0604861	0.104135	1	-1.00204	1.83512e-172	1.90155e-168	-8.45137	NA
ENSMUSG00000003435	Supt5	109.773	108.391	107.846	142.677	139.103	136.808	99.6173	101.334	100.471	134.189	131.721	133.401	Supt5	0.360569	-0.113142	0.292594	6.94569e-51	5.26761e-47	5.05855e-06	0.0475302	-0.0679082	0.00384769	1	0.405803	3.93048e-63	3.18683e-59	-3.58667	NA
ENSMUSG00000003437	Paf1	32.0581	34.1211	32.7917	50.9551	53.3889	54.0991	31.2467	33.6505	32.133	50.1602	47.0999	46.1519	Paf1	0.679492	-0.0285005	0.534657	8.96362e-70	7.48731e-66	0.485214	1	-0.144142	0.000100146	1	0.563851	5.9189e-48	4.4155e-44	-19.7839	NA
ENSMUSG00000003438	Timm50	45.5216	48.6022	47.5767	28.9456	30.3106	30.0126	51.4483	55.6985	54.5985	31.8857	31.8962	30.3817	Timm50	-0.667346	0.191035	-0.589445	5.55382e-71	4.66187e-67	7.57576e-08	0.000767727	0.0771701	0.0480562	1	-0.781212	1.6052e-101	1.47904e-97	-4.08936	NA
ENSMUSG00000003444	Med29	7.03062	7.55576	6.54427	7.52891	8.04004	7.11386	7.63084	7.11674	8.37273	8.05334	8.55965	7.16353	Med29	0.100801	0.130095	0.168783	0.203672	1	0.10364	1	0.0699374	0.377848	1	0.0406413	0.608829	1	0.312396	NA
ENSMUSG00000003452	Bicd1	2.68163	2.6455	3.0723	27.488	27.1144	26.5695	4.01565	3.87244	3.19356	24.9423	25.3565	28.7684	Bicd1	3.2864	0.403935	3.23508	0	0	3.82432e-05	0.340441	-0.0376035	0.496811	1	2.84487	0	0	7.04288	NA
ENSMUSG00000003458	Ncstn	136.367	137.42	137.782	227.703	222.566	223.953	128.74	133.628	133.564	229.026	230.211	225.7	Ncstn	0.712258	-0.0558828	0.734804	3.7808e-204	4.02958e-200	0.0211387	1	0.0226972	0.315141	1	0.790839	1.9745e-251	2.1755e-247	-14.1517	NA
ENSMUSG00000003464	Pex19	88.8449	86.9854	86.7153	140.643	144.533	140.958	71.9678	73.658	72.4061	142.411	138.671	137.863	Pex19	0.698708	-0.268088	0.674132	2.58191e-174	2.67693e-170	4.68418e-24	5.64304e-20	-0.0243708	0.304983	1	0.942426	1.04235e-306	1.17754e-302	-3.51536	NA
ENSMUSG00000003500	Impdh1	50.7204	53.1462	50.0685	38.2844	38.37	38.9435	57.2727	59.7208	61.4424	40.7227	40.6967	39.5031	Impdh1	-0.413253	0.213186	-0.347909	2.45693e-35	1.64983e-31	2.53608e-11	2.79172e-07	0.0647258	0.0567337	1	-0.561714	2.59184e-67	2.13852e-63	-2.63485	NA
ENSMUSG00000003518	Dusp3	3.18151	3.36123	3.73679	39.614	38.3528	38.1767	5.37135	4.76628	5.14416	42.0006	40.6512	40.4529	Dusp3	3.50954	0.57578	3.58508	0	0	2.02281e-13	2.29286e-09	0.0839946	0.010348	1	3.01776	0	0	5.24116	Dox.only
ENSMUSG00000003527	Ess2	31.4416	31.9572	31.4461	28.7855	29.6576	27.8776	28.1169	30.4062	29.4257	27.5903	27.2228	26.8688	Ess2	-0.137206	-0.108897	-0.215597	0.000118993	0.30141	0.00222348	1	-0.0786505	0.0272748	1	-0.106959	0.00295932	1	0.982207	NA
ENSMUSG00000003528	Slc25a1	65.5503	64.6645	62.8932	99.6033	98.1879	99.5958	55.1974	57.4034	59.7777	103.952	102.847	99.4782	Slc25a1	0.623311	-0.163937	0.66539	2.04183e-98	1.86603e-94	1.47574e-07	0.0014812	0.0423271	0.136004	1	0.829576	1.77204e-171	1.83459e-167	-5.06032	NA
ENSMUSG00000003531	Dgcr6	19.811	21.9203	19.2693	24.8609	20.9969	22.5701	20.2505	20.2595	20.3958	23.2026	23.733	22.4212	Dgcr6	0.166817	-0.00224173	0.187055	0.00233561	1	0.973337	1	0.0186289	0.726495	1	0.187688	0.000557873	1	-83.7245	NA
ENSMUSG00000003534	Ddr1	157.679	155.862	150.124	136.974	135.426	132.313	110.982	112.374	113.1	165.642	169.245	163.961	Ddr1	-0.196394	-0.462767	0.105707	2.04107e-14	9.44199e-11	1.10594e-70	1.38508e-66	0.301937	1.78204e-32	2.23967e-28	0.568311	1.6428e-107	1.53092e-103	-1.22807	NA
ENSMUSG00000003541	Ier3	48.2377	47.9863	48.7728	377.524	360.95	366.983	38.1089	42.4068	40.6248	229.195	229.498	225.143	Ier3	2.93138	-0.259401	2.23761	0	0	3.7931e-14	4.33248e-10	-0.693054	3.72927e-145	4.70895e-141	2.49773	0	0	-9.62883	NA
ENSMUSG00000003545	Fosb	3.04821	3.06163	2.57393	5.22224	3.8643	4.19702	3.34617	3.24344	3.14311	4.97423	5.14565	4.63064	Fosb	0.619975	0.166284	0.767601	6.90825e-09	2.52358e-05	0.143362	1	0.150605	0.123639	1	0.604298	4.45091e-09	1.62681e-05	3.63414	NA
ENSMUSG00000003546	Klc4	12.696	11.3841	11.3951	37.5796	36.4626	34.0871	10.4761	9.7155	10.7101	38.4288	37.3738	36.4123	Klc4	1.60972	-0.199878	1.66295	1.02518e-247	1.12678e-243	0.000558652	1	0.0541467	0.208562	1	1.86375	0	0	-9.32446	NA
ENSMUSG00000003549	Ercc1	15.4453	14.4967	13.0895	12.2544	12.7141	12.5416	13.0536	14.8964	14.09	13.7651	13.6579	12.6514	Ercc1	-0.198737	-0.0334986	-0.100419	0.00108766	1	0.582705	1	0.0956875	0.116272	1	-0.0695513	0.251346	1	2.07624	NA
ENSMUSG00000003573	Homer3	28.5089	29.4272	27.9243	25.9342	23.7635	24.1037	26.4097	27.4764	27.8283	29.4994	30.4396	30.7133	Homer3	-0.218281	-0.0714708	0.0784701	2.18753e-08	7.76135e-05	0.0655419	1	0.296834	8.4711e-15	1.05389e-10	0.150024	7.91904e-05	0.195283	-2.09909	NA
ENSMUSG00000003575	Crtc1	60.9347	63.2664	60.8167	64.8751	67.1362	63.2706	58.7791	59.2739	60.0972	67.3417	67.9328	65.4802	Crtc1	0.0771583	-0.0546108	0.117832	0.00833153	1	0.0670809	1	0.0406276	0.163902	1	0.172397	3.77532e-09	1.38554e-05	-3.15683	NA
ENSMUSG00000003581	Rnf215	24.6099	25.5656	25.1168	36.7787	35.8267	35.4102	23.464	24.2486	24.3979	36.3658	34.8853	34.9197	Rnf215	0.520975	-0.0623657	0.495717	6.3116e-54	4.87886e-50	0.0885352	1	-0.0248051	0.434284	1	0.558537	2.19346e-61	1.76485e-57	-8.95584	NA
ENSMUSG00000003585	Sec14l2	0.415492	0.398436	0.430943	1.13752	1.44134	1.64102	0.316777	0.280536	0.368558	1.27929	1.24611	1.4193	Sec14l2	1.84223	-0.400221	1.66236	2.66416e-21	1.45596e-17	0.160727	1	-0.102505	0.513159	1	2.1402	7.30862e-25	4.23242e-21	-5.34754	NA
ENSMUSG00000003604	Aven	16.4618	18.0754	16.2126	8.82641	9.03672	8.40689	18.627	18.6208	19.4373	9.88541	10.5018	9.68134	Aven	-0.954013	0.159777	-0.754323	7.44993e-71	6.24825e-67	0.000991298	1	0.197103	0.000760563	1	-0.916693	7.47804e-72	6.26436e-68	-5.73731	NA
ENSMUSG00000003617	Cp	347.501	340.837	348.143	16.5313	15.6182	15.8644	276.946	275.003	271.619	9.71606	9.10589	8.94258	Cp	-4.4343	-0.331762	-5.22316	0	0	3.43529e-47	4.27144e-43	-0.792986	4.42452e-64	5.57755e-60	-4.89552	0	0	14.7561	NA
ENSMUSG00000003623	Crot	30.3918	29.8766	29.9012	33.6711	34.641	34.448	27.4307	27.1122	27.307	33.7793	33.9598	34.8745	Crot	0.188607	-0.139828	0.186413	1.11138e-09	4.23435e-06	1.7782e-05	0.161994	-0.00180982	0.954007	1	0.326626	1.41111e-25	8.29027e-22	-2.33592	NA
ENSMUSG00000003644	Rps6ka1	12.0295	12.466	12.641	15.426	15.5667	15.5035	12.8863	14.2509	13.4174	16.3362	16.3284	15.6517	Rps6ka1	0.324861	0.127532	0.379697	2.96389e-12	1.26914e-08	0.00838345	1	0.0554669	0.206871	1	0.252796	2.04975e-08	7.19256e-05	1.98222	NA
ENSMUSG00000003660	Snrnp200	323.274	326.456	329.77	269.447	262.193	264.638	308.763	294.304	298.558	249.225	248.875	255.341	Snrnp200	-0.298758	-0.119545	-0.378604	9.54591e-35	6.36617e-31	8.05255e-07	0.00785205	-0.0798205	0.00109249	1	-0.259033	2.12256e-26	1.26229e-22	2.16683	NA
ENSMUSG00000003662	Ciao1	41.3559	40.5793	39.8353	60.2618	59.7814	60.0982	38.1089	38.6163	39.0946	58.7664	59.4054	56.4342	Ciao1	0.565414	-0.0723394	0.519755	2.14659e-84	1.88384e-80	0.0205782	1	-0.0452139	0.100959	1	0.59254	1.42036e-91	1.27392e-87	-8.19111	NA
ENSMUSG00000003680	Taf6l	51.9868	49.1015	49.105	52.8132	52.2719	50.2952	48.0674	51.2459	50.9327	52.4542	52.016	47.8556	Taf6l	0.048668	0.000545081	0.0196387	0.201184	1	0.992386	1	-0.0284246	0.452447	1	0.0196984	0.605648	1	36.1384	NA
ENSMUSG00000003721	Insig2	37.4902	38.482	38.0911	81.5344	80.9178	80.2003	37.6403	37.9045	37.1272	81.0591	81.9833	79.788	Insig2	1.08953	-0.0176755	1.09011	0	0	0.563934	1	0.0011616	0.966184	1	1.10837	0	0	-62.7066	NA
ENSMUSG00000003731	Kpna6	86.7287	86.4527	85.9677	132.313	129.274	129.922	89.0395	83.391	84.2274	127.708	132.935	134.486	Kpna6	0.595478	-0.0139704	0.608199	6.3042e-98	5.74943e-94	0.635904	1	0.0132993	0.629812	1	0.622748	1.94202e-107	1.80958e-103	-44.5761	NA
ENSMUSG00000003746	Man1a	6.9473	7.87201	7.14232	2.83549	3.1082	2.43789	6.99483	6.1567	6.708	2.37237	2.4448	2.73098	Man1a	-1.40529	-0.14602	-1.54137	2.20233e-56	1.72597e-52	0.0608153	1	-0.146458	0.161139	1	-1.40574	2.96641e-54	2.30075e-50	9.62705	NA
ENSMUSG00000003752	Itpkc	5.9642	5.59166	5.92962	9.70742	9.08827	8.93313	5.27092	5.04767	6.32124	8.93089	8.3017	9.39488	Itpkc	0.667768	-0.0724112	0.605514	1.44462e-19	7.61028e-16	0.378149	1	-0.0583662	0.402814	1	0.68182	4.75178e-20	2.51416e-16	-9.41594	NA
ENSMUSG00000003762	Coq8b	4.88112	4.67618	3.77002	6.5678	7.16365	6.63273	4.60145	4.84904	4.72377	6.74472	7.52786	6.65092	Coq8b	0.613752	0.0896981	0.657479	1.29869e-13	5.85058e-10	0.325511	1	0.0407441	0.609252	1	0.564802	3.44782e-12	1.44808e-08	6.2967	NA
ENSMUSG00000003778	Brd8	94.6102	94.2925	96.882	87.8777	86.7776	86.485	92.1192	87.8105	88.0277	79.3502	81.4219	83.4064	Brd8	-0.130183	-0.0929819	-0.227186	2.04717e-06	0.00624592	0.000706767	1	-0.0968082	0.000443204	1	-0.134009	1.18759e-06	0.00363048	1.44124	NA
ENSMUSG00000003779	Kif20a	149.881	154.714	152.301	31.5727	31.3073	31.1703	129.777	122.372	128.351	32.5015	33.1556	33.2915	Kif20a	-2.28154	-0.264077	-2.20707	0	0	2.0225e-23	2.43307e-19	0.0734607	0.0354456	1	-1.944	0	0	7.36151	NA
ENSMUSG00000003808	Farsa	66.5501	69.9243	71.216	54.4791	52.7015	53.2721	74.1771	75.3795	74.0708	52.5158	55.5362	52.1976	Farsa	-0.372336	0.106716	-0.374091	3.03757e-32	1.96531e-28	0.000513281	1	-0.00196235	0.956259	1	-0.481014	7.37832e-54	5.70934e-50	-4.50743	NA
ENSMUSG00000003809	Gcdh	28.3756	28.828	27.725	30.7557	31.2214	29.8021	25.2884	27.3936	28.215	31.4084	30.394	30.3213	Gcdh	0.111298	-0.0702405	0.117322	0.00394139	1	0.0764601	1	0.00606062	0.884565	1	0.187599	1.23137e-06	0.00375691	-2.67081	NA
ENSMUSG00000003810	Mast2	141.999	140.549	139.925	236.561	224.56	228.659	148.406	141.308	146.024	237.186	237.54	239.556	Mast2	0.7075	0.0445804	0.757649	5.55448e-167	5.71334e-163	0.0904587	1	0.0502708	0.0439804	1	0.713191	2.96899e-171	3.07261e-167	15.9978	NA
ENSMUSG00000003812	Dnase2a	19.2444	18.375	18.2892	23.4994	22.7325	24.4345	17.2044	17.5449	17.9744	25.358	25.8876	24.5017	Dnase2a	0.339898	-0.0847796	0.438136	1.01689e-16	4.98783e-13	0.0508013	1	0.0987918	0.00975788	1	0.523471	2.56173e-38	1.7617e-34	-6.17449	NA
ENSMUSG00000003813	Rad23a	69.516	70.6234	70.0033	48.264	48.079	47.1377	81.6753	83.4737	86.6656	53.3625	55.521	53.7355	Rad23a	-0.551108	0.261056	-0.37006	5.26486e-78	4.53357e-74	9.16262e-21	1.09273e-16	0.181088	1.86609e-09	2.2841e-05	-0.631077	8.27132e-110	7.75354e-106	-2.4174	NA
ENSMUSG00000003814	Calr	983.103	983.232	979.893	896.812	911.941	912.703	843.175	857.968	866.803	930.31	914.512	912.685	Calr	-0.114494	-0.198261	-0.0955556	1.49503e-07	0.000501584	1.05258e-19	1.24899e-15	0.0189815	0.383739	1	0.102749	2.48119e-06	0.00733193	-0.518251	NA
ENSMUSG00000003824	Syce2	2.79827	3.62755	3.38793	1.74623	2.07716	1.70116	3.56375	3.21034	3.07585	1.80274	1.54958	1.63038	Syce2	-0.844443	0.00530643	-0.972222	1.10745e-12	4.83845e-09	0.981683	1	-0.147102	0.268416	1	-0.996866	6.1998e-17	3.04162e-13	-187.86	NA
ENSMUSG00000003847	Nfat5	251.724	241.966	256.692	422.6	408.98	417.441	259.623	233.109	233.229	357.687	366.043	392.434	Nfat5	0.735193	-0.0477476	0.572157	5.21471e-78	4.49091e-74	0.226358	1	-0.162271	3.10385e-05	0.360139	0.62067	3.87728e-56	3.03901e-52	-12.999	NA
ENSMUSG00000003848	Nob1	62.551	62.3842	60.7004	34.5842	33.7131	33.6361	69.9426	72.1187	72.7256	35.8731	35.1736	35.0253	Nob1	-0.865445	0.210542	-0.807375	7.50791e-191	7.90433e-187	5.44323e-15	6.27169e-11	0.0574194	0.0709293	1	-1.01857	1.66128e-282	1.8593e-278	-4.83785	NA
ENSMUSG00000003849	Nqo1	11.3463	11.7503	10.9964	5.17419	5.29058	5.21942	11.1289	12.5956	13.0138	5.92875	5.93466	5.1131	Nqo1	-1.12497	0.10811	-1.00888	2.47657e-58	1.96392e-54	0.0887652	1	0.114765	0.144139	1	-1.11833	3.83596e-61	3.08373e-57	-10.3444	NA
ENSMUSG00000003863	Ppfia3	11.1963	10.7017	10.0661	19.8471	18.8317	18.3903	9.97402	10.361	9.3144	19.3075	18.8623	20.0692	Ppfia3	0.837753	-0.108438	0.866431	5.05357e-61	4.05903e-57	0.0593313	1	0.0297602	0.528774	1	0.975955	4.91391e-82	4.28395e-78	-9.00008	NA
ENSMUSG00000003865	Gys1	98.4093	99.4358	100.454	66.3969	66.1051	67.1798	113.007	113.881	113.924	67.2493	65.1257	64.4852	Gys1	-0.579024	0.192266	-0.599768	2.72463e-119	2.61319e-115	5.31666e-16	6.17637e-12	-0.0209037	0.427014	1	-0.792194	2.35737e-230	2.56859e-226	-4.12031	NA
ENSMUSG00000003868	Ruvbl2	71.149	74.2687	73.5085	28.0967	27.5268	28.7646	87.3993	92.1969	94.2326	30.6233	30.8796	30.3666	Ruvbl2	-1.37552	0.322938	-1.25258	0	0	6.83268e-26	8.27232e-22	0.121886	0.00109949	1	-1.57657	0	0	-4.88197	NA
ENSMUSG00000003872	Lin7b	1.24863	0.914429	1.06221	3.31604	2.42084	2.84384	1.0532	1.24058	0.889838	2.81885	2.6724	2.97221	Lin7b	1.44024	-0.0182256	1.40214	1.36858e-23	7.81871e-20	0.927942	1	-0.022661	0.877002	1	1.43585	2.01897e-23	1.14415e-19	-78.7819	NA
ENSMUSG00000003873	Bax	40.1062	40.6792	40.151	30.5635	30.3622	31.1252	41.9082	44.8731	46.6616	31.6548	31.7141	30.5777	Bax	-0.393685	0.142049	-0.364509	1.44154e-26	8.65358e-23	6.65843e-05	0.582213	0.0289666	0.442196	1	-0.506769	1.39835e-44	1.01408e-40	-3.56756	NA
ENSMUSG00000003923	Tfam	36.1738	37.3835	38.8386	24.4765	25.6194	24.9908	42.4438	42.8041	42.5754	26.3279	25.5993	25.8586	Tfam	-0.583138	0.185685	-0.530499	6.53539e-66	5.37079e-62	4.453e-09	4.67387e-05	0.0515017	0.153347	1	-0.717323	4.79239e-106	4.45501e-102	-3.86312	NA
ENSMUSG00000003929	Zfp81	23.1269	22.453	23.1068	21.0485	20.8766	21.7281	26.1922	23.3714	23.4058	19.7232	19.8941	21.4864	Zfp81	-0.109341	0.0873155	-0.169711	0.019632	1	0.0603376	1	-0.059482	0.209982	1	-0.256139	3.58453e-08	0.000123774	-2.93349	NA
ENSMUSG00000003934	Efnb3	1.63187	1.28062	1.42768	0.881228	0.702428	0.72387	1.22057	1.3068	1.25978	0.694257	0.897126	0.861467	Efnb3	-0.937738	-0.200895	-0.825084	4.26494e-09	1.57589e-05	0.160392	1	0.0917978	0.655882	1	-0.645084	5.42751e-05	0.136936	3.21105	NA
ENSMUSG00000003948	Mmd	39.1898	40.3296	40.749	17.8769	19.1582	18.6459	38.0922	38.2521	39.9522	18.9226	19.8182	19.255	Mmd	-1.11294	-0.0485791	-1.0523	3.70888e-210	3.9737e-206	0.140888	1	0.0596176	0.145898	1	-1.00475	1.30859e-174	1.35871e-170	20.6827	NA
ENSMUSG00000003955	Fam162a	51.9701	52.7135	52.793	16.1949	16.8727	16.6763	55.9171	60.4325	59.0882	19.2921	17.6333	17.8077	Fam162a	-1.66462	0.155958	-1.5258	0	0	4.0604e-06	0.0383302	0.13811	0.00194837	1	-1.68247	0	0	-10.7879	NA
ENSMUSG00000003970	Rpl8	1044.36	1071.57	1027.87	599.877	595.96	596.316	1036.42	1118.95	1106.36	611.56	613.383	578.661	Rpl8	-0.810841	0.0531362	-0.801925	9.6375e-154	9.7676e-150	0.0805796	1	0.00917908	0.764707	1	-0.854799	1.12553e-170	1.16379e-166	-16.0869	NA
ENSMUSG00000003992	Ssbp2	21.294	22.9024	21.9439	25.3735	25.8084	24.5397	22.3259	22.1465	22.6323	28.5756	26.9649	27.0648	Ssbp2	0.194438	0.0208529	0.320841	6.34578e-07	0.0020224	0.608681	1	0.126472	0.000736322	1	0.300057	4.06517e-15	1.8899e-11	14.3892	NA
ENSMUSG00000004018	Fancl	7.71379	8.68761	8.25534	4.66159	4.56885	4.10681	9.27107	8.90442	9.2135	5.03581	4.75115	5.05279	Fancl	-0.893865	0.152005	-0.731383	2.29395e-38	1.58925e-34	0.0120052	1	0.157751	0.0385685	1	-0.88813	3.63498e-43	2.61028e-39	-5.84276	NA
ENSMUSG00000004032	Gstm5	42.3224	42.8763	40.4666	39.9504	39.7619	42.4618	37.6403	42.0758	39.9522	42.1545	41.7437	41.252	Gstm5	-0.0398972	-0.0704747	-0.00554201	0.299665	1	0.0704343	1	0.0339429	0.373304	1	0.0645205	0.0951168	1	-0.915513	NA
ENSMUSG00000004035	Gstm7	3.03155	2.36254	2.37458	0.208451	0.324378	0.257777	1.55531	1.73716	1.19252	0.293973	0.229501	0.213168	Gstm7	-3.46371	-0.80418	-3.40256	2.93376e-61	2.35845e-57	1.02544e-07	0.00103488	-0.109179	0.836879	1	-2.76894	1.51273e-33	9.92047e-30	3.44318	NA
ENSMUSG00000004040	Stat3	366.33	366.887	365.653	264.738	255.766	262.578	299.658	289.371	294.993	243.744	248.283	246.521	Stat3	-0.488692	-0.31391	-0.573296	1.27772e-101	1.17793e-97	2.8141e-43	3.49089e-39	-0.08461	0.000249475	1	-0.259392	1.73659e-29	1.08276e-25	0.826327	NA
ENSMUSG00000004043	Stat5a	29.8753	31.1916	29.6188	21.5611	22.1654	21.1418	19.5978	19.9284	20.2108	20.493	19.6665	19.1646	Stat5a	-0.484959	-0.603008	-0.612436	6.18306e-39	4.30465e-35	3.06977e-57	3.832e-53	-0.128292	0.00109457	1	-0.0102421	0.808161	1	0.016985	NA
ENSMUSG00000004044	Cavin1	1134.42	1135.77	1137.31	317.439	309.106	303.128	974.409	990.504	987.219	306.266	303.68	304.989	Cavin1	-1.8741	-0.206958	-1.89698	0	0	2.25496e-21	2.69626e-17	-0.0229833	0.314966	1	-1.69012	0	0	8.16648	NA
ENSMUSG00000004054	Map3k11	41.7725	42.7931	40.0347	105.082	101.917	101.25	31.7321	32.0946	33.596	98.0867	98.7953	99.237	Map3k11	1.30738	-0.355334	1.2494	0	0	5.15149e-26	6.23896e-22	-0.0578661	0.0311618	1	1.60485	0	0	-4.51646	NA
ENSMUSG00000004056	Akt2	123.553	123.854	120.106	120.219	115.561	116.165	117.961	120.171	118.935	118.286	118.627	117.51	Akt2	-0.0623882	-0.0415908	-0.0521985	0.0109616	1	0.0908069	1	0.0100476	0.681482	1	-0.0107498	0.66258	1	0.258467	NA
ENSMUSG00000004069	Dnaja3	58.8519	57.6404	58.8232	64.3946	65.2975	63.4961	75.3654	73.5753	73.3814	61.9532	60.5434	61.892	Dnaja3	0.139665	0.342847	0.0727827	1.42831e-07	0.000480199	4.09617e-39	5.05918e-35	-0.0668507	0.0102743	1	-0.270033	9.93889e-26	5.85897e-22	-0.78762	NA
ENSMUSG00000004070	Hmox2	29.0755	28.8446	28.4227	31.1722	32.1837	29.4412	27.983	28.3537	27.307	30.1152	29.8326	30.7586	Hmox2	0.102476	-0.0457741	0.0710742	0.00406704	1	0.213792	1	-0.0312185	0.365352	1	0.117032	0.00114025	1	-2.55674	NA
ENSMUSG00000004071	Cdip1	52.7533	53.1795	53.4574	127.171	128.415	130.012	50.193	52.0404	51.9585	126.199	129.4	126.842	Cdip1	1.27513	-0.0478463	1.26261	0	0	0.0941671	1	-0.0119657	0.609535	1	1.31101	0	0	-27.4005	NA
ENSMUSG00000004085	Map3k20	33.2412	32.7895	34.7188	47.7033	47.5979	47.1227	37.2386	35.4547	38.0521	47.4352	48.9358	49.1974	Map3k20	0.499627	0.136415	0.53117	1.20275e-52	9.22029e-49	6.33492e-05	0.555002	0.0317701	0.308464	1	0.394982	7.718e-35	5.12939e-31	2.89545	NA
ENSMUSG00000004096	Cwc15	76.4144	75.6169	76.0834	77.1133	78.323	80.5311	75.8173	80.246	79.3173	77.98	75.7774	78.2803	Cwc15	0.0491593	0.0452897	0.0244622	0.082934	1	0.110609	1	-0.0245561	0.38426	1	-0.0206865	0.463249	1	-0.45676	NA
ENSMUSG00000004098	Col5a3	11.213	10.6517	11.1459	0.592895	0.513403	0.40813	11.9322	11.6356	12.5262	0.648071	0.441927	0.695623	Col5a3	-4.53802	0.128983	-4.23536	0	0	0.01702	1	0.25836	0.261609	1	-4.40881	0	0	-34.1813	NA
ENSMUSG00000004099	Dnmt1	355.883	351.607	355.901	118.313	111.402	110.361	363.861	346.957	344.413	118.671	118.005	122.983	Dnmt1	-1.64504	-0.0111146	-1.56419	0	0	0.695611	1	0.0808582	0.00790478	1	-1.55307	0	0	139.733	NA
ENSMUSG00000004100	Ppan	49.5207	51.2654	48.6233	18.4856	16.993	15.3382	55.5321	60.8464	59.8113	18.0605	17.6788	17.0538	Ppan	-1.55896	0.238028	-1.5009	4.4193e-227	4.79715e-223	9.77108e-08	0.000986684	0.0563893	0.297795	1	-1.7406	6.83433e-294	7.68657e-290	-7.3126	NA
ENSMUSG00000004105	Angptl2	66.3168	66.5454	64.1558	4.18104	3.8643	4.24212	72.1352	73.807	71.2963	4.82027	4.96357	5.06787	Angptl2	-4.0103	0.141084	-3.72973	0	0	4.43318e-07	0.00437112	0.272762	0.000189078	1	-3.87864	0	0	-27.4918	NA
ENSMUSG00000004127	Trmt10a	16.1951	17.2098	17.5582	11.918	11.6487	11.6846	17.5726	18.7035	18.1762	11.5635	11.564	12.365	Trmt10a	-0.53288	0.0957687	-0.521821	5.33538e-29	3.32501e-25	0.0329456	1	0.00999534	0.853352	1	-0.618656	2.92386e-40	2.04203e-36	-6.45989	NA
ENSMUSG00000004151	Etv1	35.1907	34.3707	36.7787	10.2681	9.48351	10.0307	30.5773	29.0323	29.7957	10.0394	9.95559	10.2995	Etv1	-1.83795	-0.250582	-1.81114	0	0	1.35665e-11	1.50004e-07	0.0233519	0.662183	1	-1.56402	3.2616e-291	3.6644e-287	6.24155	NA
ENSMUSG00000004187	Kifc2	3.14819	2.42912	2.97263	13.8402	13.3499	12.9475	2.60974	2.34961	2.5882	13.8729	13.5668	12.9982	Kifc2	2.24254	-0.182323	2.24992	3.83249e-222	4.14561e-218	0.0713792	1	0.0111485	0.841243	1	2.43603	2.39396e-251	2.63742e-247	-13.3611	NA
ENSMUSG00000004207	Psap	699.253	684.472	684.858	1072.68	1029.58	1056.2	694.818	709.111	709.427	1101.45	1097.23	1081.6	Psap	0.610636	0.0308966	0.665204	1.4533e-149	1.46434e-145	0.188902	1	0.0545617	0.0188121	1	0.634301	1.62804e-161	1.66679e-157	20.5298	NA
ENSMUSG00000004221	Ikbkg	42.8056	43.7585	45.334	61.7035	61.328	61.6167	44.5526	44.2772	45.1818	57.0728	58.6923	61.0627	Ikbkg	0.485681	0.0228922	0.42277	3.07574e-56	2.4083e-52	0.478798	1	-0.0623919	0.0345475	1	0.400397	6.8481e-39	4.73546e-35	17.4906	NA
ENSMUSG00000004233	Wars2	24.9264	22.0868	23.8543	26.7031	24.9664	25.6223	25.6064	24.4969	22.9013	25.1116	24.0212	24.0494	Wars2	0.125703	0.0429958	0.0478534	0.00805408	1	0.371824	1	-0.0793659	0.0911241	1	0.0033418	0.947384	1	0.0777238	NA
ENSMUSG00000004263	Atn1	32.8579	31.2748	30.0507	30.8518	35.6549	33.9669	28.5019	30.6214	30.7373	31.2699	32.2452	32.6582	Atn1	0.0928354	-0.0678102	0.0308878	0.0487903	1	0.156529	1	-0.0625531	0.180083	1	0.0980929	0.0385537	1	-1.44658	NA
ENSMUSG00000004264	Phb2	186.372	192.564	187.386	116.439	111.093	110.406	192.29	208.28	204.677	117.239	114.014	110.665	Phb2	-0.745043	0.0959316	-0.728225	5.65683e-120	5.43282e-116	0.00219883	1	0.016867	0.604441	1	-0.824108	1.32099e-147	1.32733e-143	-8.59057	NA
ENSMUSG00000004266	Ptpn6	0.948701	1.08088	1.1785	1.6341	1.78503	1.73123	1.08668	1.24058	0.738498	1.52562	1.45854	1.63038	Ptpn6	0.697732	-0.0659919	0.528649	1.95212e-06	0.00596882	0.699436	1	-0.160482	0.241001	1	0.603279	6.07569e-05	0.152378	-9.14172	NA
ENSMUSG00000004267	Eno2	36.657	35.0365	37.9083	88.086	83.9594	85.6882	31.3137	33.1208	33.3101	89.2034	89.2665	87.0098	Eno2	1.23448	-0.165325	1.27698	0	0	4.34828e-06	0.041026	0.0424995	0.149292	1	1.44231	0	0	-8.72406	NA
ENSMUSG00000004268	Emg1	80.3469	80.0611	78.5753	51.724	48.4742	51.1522	79.1647	83.4903	82.8822	52.0693	50.9994	51.7604	Emg1	-0.658546	0.0390794	-0.626219	1.40823e-106	1.31331e-102	0.177194	1	0.0319995	0.301037	1	-0.665627	6.90554e-111	6.49052e-107	-17.0327	NA
ENSMUSG00000004270	Lpcat3	56.9356	57.7069	57.2949	90.729	92.2422	93.0705	52.1512	53.4143	54.4135	95.9005	95.4875	95.8447	Lpcat3	0.683399	-0.104081	0.740355	8.55179e-161	8.75019e-157	0.000143756	1	0.0572373	0.0156261	1	0.844718	2.2508e-245	2.47138e-241	-8.11597	NA
ENSMUSG00000004285	Atp6v1f	101.975	99.3193	99.4569	234.639	248.583	235.785	94.7971	107.111	102.607	249.348	244.156	238.862	Atp6v1f	1.25755	0.0179953	1.28388	5.18848e-277	5.78827e-273	0.620776	1	0.0266857	0.436542	1	1.26624	1.14469e-281	1.28045e-277	70.3652	NA
ENSMUSG00000004317	Clcn5	56.2525	52.9465	58.1421	70.5297	68.2532	68.8637	55.666	47.985	49.4866	65.3711	67.5231	71.1792	Clcn5	0.311535	-0.128095	0.286485	7.90396e-12	3.32678e-08	0.00567404	1	-0.025041	0.579064	1	0.41459	1.14592e-19	6.00234e-16	-3.23658	NA
ENSMUSG00000004319	Clcn3	8.46362	8.47123	8.62081	41.36	40.7414	42.8527	15.0955	13.4895	13.3837	37.6898	40.1201	41.9153	Clcn3	2.29424	0.717613	2.2267	0	0	2.44696e-35	3.01074e-31	-0.0620392	0.143387	1	1.51459	2.79336e-231	3.04477e-227	2.11059	Dox.only
ENSMUSG00000004356	Utp20	82.9629	83.4899	85.486	53.3899	51.7392	50.7462	106.212	97.7586	97.6966	51.7922	52.0312	55.017	Utp20	-0.693186	0.259946	-0.665923	1.62785e-85	1.43284e-81	2.21331e-14	2.53424e-10	0.0274634	0.454206	1	-0.925669	7.3575e-156	7.46713e-152	-3.56101	NA
ENSMUSG00000004364	Cul3	126.786	121.49	124.409	137.92	141.251	142.657	133.593	131.079	129.881	147.737	144.179	148.101	Cul3	0.178811	0.08229	0.239715	1.74397e-12	7.55137e-09	0.0012705	1	0.060842	0.0146702	1	0.157363	3.65469e-10	1.40852e-06	1.9123	NA
ENSMUSG00000004371	Il11	11.113	12.8988	12.4749	12.8791	12.1814	11.9251	11.8486	12.397	12.1394	17.029	16.2525	16.1794	Il11	0.0192297	-0.00400605	0.441435	0.731094	1	0.95146	1	0.420438	3.87363e-16	4.8277e-12	0.443673	1.54078e-17	7.6546e-14	-110.751	NA
ENSMUSG00000004383	Large1	58.5019	58.7889	58.9229	100.869	94.9229	96.709	57.7246	53.4639	55.0021	99.3183	101.405	102.011	Large1	0.731585	-0.084602	0.780639	3.87948e-128	3.78405e-124	0.0084278	1	0.0494864	0.0878123	1	0.865674	6.58913e-179	6.87312e-175	-10.2323	NA
ENSMUSG00000004393	Ddx56	58.7186	56.6583	57.8597	43.09	41.0679	43.1684	59.164	61.823	61.5433	41.1692	41.6223	40.3624	Ddx56	-0.443633	0.0754605	-0.492243	4.48938e-48	3.34458e-44	0.0103611	1	-0.0489895	0.124678	1	-0.568083	5.74612e-79	4.95718e-75	-7.52822	NA
ENSMUSG00000004394	Tmed4	86.4288	86.8189	86.1006	168.675	168.058	171.043	81.1062	85.1124	83.7734	168.491	173.6	170.309	Tmed4	0.969686	-0.0529858	0.982274	0	0	0.0440971	1	0.0129606	0.578714	1	1.03563	0	0	-19.5455	NA
ENSMUSG00000004446	Bid	47.2046	48.5855	46.1813	34.3599	32.6305	33.4406	53.5739	56.6917	56.835	34.0719	33.9446	34.1358	Bid	-0.499318	0.235286	-0.474572	1.57457e-50	1.19085e-46	1.03899e-13	1.18134e-09	0.0240908	0.485503	1	-0.710514	1.74382e-106	1.62245e-102	-3.01979	NA
ENSMUSG00000004451	Ralb	49.9873	50.9158	51.1982	37.2432	36.7719	37.7407	50.6282	50.501	49.8734	37.7514	37.48	38.2065	Ralb	-0.44442	-0.0104516	-0.4231	2.63831e-57	2.07925e-53	0.700308	1	0.021016	0.465891	1	-0.412953	1.41019e-50	1.07033e-46	39.5111	NA
ENSMUSG00000004455	Ppp1cc	101.942	103.347	104.258	89.6397	85.4888	85.6882	108.153	109.13	110.157	84.3076	83.8648	83.0295	Ppp1cc	-0.247156	0.0810829	-0.301279	2.71957e-22	1.52105e-18	0.00120602	1	-0.0542878	0.035361	1	-0.382527	1.01314e-51	7.73941e-48	-4.71772	NA
ENSMUSG00000004460	Dnajb11	99.8256	98.7367	97.1644	114.372	118.534	118.345	99.6173	102.807	102.943	126.368	126.168	129.24	Dnajb11	0.248284	0.0463116	0.368462	3.46222e-22	1.93053e-18	0.0754754	1	0.12031	1.46755e-06	0.0174858	0.322282	4.03637e-37	2.74433e-33	6.95899	NA
ENSMUSG00000004462	Tbccd1	25.0597	23.9011	23.3393	19.2224	20.2064	20.0141	23.8992	24.0169	23.8766	19.523	19.5148	19.0892	Tbccd1	-0.283103	-0.0101219	-0.314236	1.20557e-13	5.43952e-10	0.791704	1	-0.0321645	0.414505	1	-0.305146	9.90979e-16	4.68733e-12	30.1471	NA
ENSMUSG00000004473	Clec11a	0.965364	1.09752	1.02899	0.464747	0.530587	0.378059	1.10342	1.19093	0.839391	0.401742	0.472274	0.394089	Clec11a	-1.23698	0.0209949	-1.28866	7.3298e-10	2.81831e-06	0.961345	1	-0.112796	0.699643	1	-1.37086	5.28973e-12	2.2037e-08	-65.295	NA
ENSMUSG00000004500	Zfp324	13.4291	13.215	14.1361	16.0507	15.876	16.8718	12.1331	11.1721	11.8872	16.6749	15.9035	16.1794	Zfp324	0.260791	-0.213365	0.258083	2.41886e-08	8.56275e-05	1.91261e-05	0.173895	-0.00266702	0.973378	1	0.471491	2.67534e-23	1.5129e-19	-2.20979	NA
ENSMUSG00000004508	Gab2	6.91398	7.00647	7.3915	23.4833	23.4198	23.4422	7.64758	6.43809	7.21246	22.8023	24.0971	23.1298	Gab2	1.72706	-0.00142911	1.7165	9.09966e-286	1.01934e-281	0.999383	1	-0.00644869	0.877288	1	1.72204	3.02831e-286	3.39474e-282	-1204.98	NA
ENSMUSG00000004530	Coro1c	56.969	58.3727	57.0789	81.198	79.8009	77.9751	72.972	72.9132	72.053	84.9542	87.0663	86.7836	Coro1c	0.470829	0.338164	0.585931	1.06513e-70	8.92684e-67	3.41347e-36	4.20403e-32	0.115403	4.40743e-06	0.0520738	0.248069	1.89313e-22	1.05466e-18	0.733577	NA
ENSMUSG00000004535	Tax1bp1	160.811	160.107	160.607	234.896	240.868	240.07	165.494	164.201	159.46	230.766	231.592	233.736	Tax1bp1	0.572076	0.0227071	0.531653	4.44926e-138	4.41411e-134	0.333626	1	-0.0403087	0.07093	1	0.50906	3.79557e-110	3.56138e-106	22.4186	NA
ENSMUSG00000004558	Ndrg2	4.29792	4.82599	4.93288	1.74623	1.57882	1.38542	3.26249	2.91239	3.46261	1.04836	1.50406	1.57007	Ndrg2	-1.59899	-0.549285	-1.78969	3.7082e-42	2.65693e-38	1.68031e-07	0.00168132	-0.191855	0.183212	1	-1.24157	4.92255e-23	2.77386e-19	2.26034	NA
ENSMUSG00000004561	Mettl17	9.34674	8.40465	8.10583	8.61816	8.79614	8.30165	8.80243	9.38445	8.13731	8.66916	8.19549	7.8269	Mettl17	-0.00897201	0.0262921	-0.0651491	0.909899	1	0.705807	1	-0.0580682	0.384032	1	-0.0933323	0.164572	1	-3.54983	NA
ENSMUSG00000004562	Arhgef40	136.017	133.608	136.469	55.7126	52.9593	51.919	133.476	130.235	136.17	60.7986	64.8223	62.1935	Arhgef40	-1.33913	-0.0222848	-1.11295	0	0	0.436751	1	0.226314	1.417e-12	1.75425e-08	-1.09054	1.34183e-293	1.50903e-289	48.9363	NA
ENSMUSG00000004565	Pnpla6	31.6249	30.093	29.8347	72.8203	70.2121	68.9389	26.5436	24.4307	24.9528	64.0162	67.0831	63.0227	Pnpla6	1.21188	-0.270341	1.08426	2.41222e-250	2.65392e-246	2.27991e-11	2.51086e-07	-0.126818	0.000151205	1	1.35541	6.26063e-299	7.05198e-295	-5.01369	NA
ENSMUSG00000004567	Mcoln1	50.0373	48.9684	50.9988	90.6809	89.2865	87.5375	45.3895	48.7464	49.1839	88.2181	88.5837	84.5673	Mcoln1	0.834773	-0.0657972	0.800966	6.8932e-153	6.97799e-149	0.0515627	1	-0.0333736	0.26888	1	0.867198	5.87692e-164	6.03619e-160	-13.1799	NA
ENSMUSG00000004568	Arhgef18	57.9687	56.7915	55.9825	98.1456	94.3902	96.8744	56.2685	58.3304	56.2969	96.4085	99.0836	97.473	Arhgef18	0.761916	0.0013797	0.778961	3.5516e-172	3.67235e-168	0.967142	1	0.0173481	0.498049	1	0.777885	2.59209e-181	2.71133e-177	563.805	NA
ENSMUSG00000004591	Pkn2	154.146	154.148	156.969	183.909	180.534	186.034	170.833	161.867	163.546	175.465	177.514	183.682	Pkn2	0.242845	0.0930066	0.205745	7.01186e-20	3.71909e-16	0.000514909	1	-0.0368087	0.162918	1	0.11303	1.98997e-05	0.0530527	1.21529	NA
ENSMUSG00000004610	Etfb	2.09843	2.19609	2.19185	2.8515	2.21463	2.7386	1.99048	2.76342	2.03329	2.91122	2.45998	2.58021	Etfb	0.274113	0.0671524	0.290454	0.0367188	1	0.63532	1	0.0230079	0.850727	1	0.229971	0.070952	1	3.42462	NA
ENSMUSG00000004626	Stxbp2	0.365503	0.381791	0.414331	4.149	3.91586	3.70085	0.366988	0.346746	0.28448	3.04978	3.11243	3.07774	Stxbp2	3.44482	-0.23832	2.99365	2.38577e-128	2.32875e-124	0.410662	1	-0.350173	4.2789e-05	0.494127	3.33323	8.02719e-101	7.3818e-97	-13.9863	NA
ENSMUSG00000004631	Sgce	30.8084	29.8267	29.2699	35.4492	34.6239	36.2823	31.3806	30.8531	31.3091	36.9816	39.5132	38.0858	Sgce	0.24351	0.0572647	0.349684	1.77272e-12	7.67235e-09	0.10651	1	0.106829	0.001133	1	0.293075	3.36399e-18	1.70049e-14	5.1179	NA
ENSMUSG00000004637	Wwox	8.86352	8.48787	9.684	14.577	13.9514	14.9623	8.28358	8.93753	8.72586	13.8421	13.6275	13.0284	Wwox	0.689021	-0.0594278	0.584713	4.47739e-37	3.06119e-33	0.328202	1	-0.104644	0.0391215	1	0.643809	7.23617e-32	4.64779e-28	-10.8335	NA
ENSMUSG00000004642	Slbp	113.989	117.096	116.717	61.319	63.1838	62.9248	117.024	119.558	120.364	62.5383	60.9834	61.6658	Slbp	-0.892339	0.037443	-0.909253	2.5812e-267	2.86332e-263	0.122477	1	-0.017321	0.526322	1	-0.947104	2.1085e-305	2.38113e-301	-25.2945	NA
ENSMUSG00000004655	Aqp1	6.58072	5.82468	6.22864	0.11234	0.135352	0.15253	6.60988	6.76914	5.53091	0.109226	0.123288	0.0624012	Aqp1	-5.89924	0.0216221	-6.03871	1.61945e-216	1.74528e-212	0.823876	1	-0.608223	0.381204	1	-6.5295	6.85023e-236	7.48113e-232	-301.982	NA
ENSMUSG00000004661	Arid3b	7.16392	6.02442	6.34493	12.5908	11.1504	10.2111	5.87346	5.13044	5.68225	10.1317	10.1073	10.5709	Arid3b	0.799558	-0.228647	0.660995	6.5168e-25	3.80842e-21	0.00753958	1	-0.139529	0.0577036	1	0.888685	5.11061e-29	3.16704e-25	-3.88671	NA
ENSMUSG00000004665	Cnn2	239.643	242.283	235.695	83.0401	81.0897	83.1472	230.065	235.178	237.45	98.9642	97.278	96.8548	Cnn2	-1.53712	-0.0303279	-1.29181	0	0	0.186271	1	0.244978	2.81575e-21	3.527e-17	-1.26182	0	0	41.6058	NA
ENSMUSG00000004667	Polr2e	55.3027	53.6789	53.2747	36.138	36.3594	36.5379	57.7414	56.5261	58.6174	37.813	39.0125	37.2265	Polr2e	-0.573767	0.0915291	-0.50867	3.73109e-82	3.255e-78	0.00123161	1	0.0648414	0.0377987	1	-0.600456	6.66191e-94	6.01637e-90	-6.56027	NA
ENSMUSG00000004677	Myo9b	136.467	134.374	133.446	165.519	158.47	157.888	142.581	133.661	136.238	166.012	166.863	168.138	Myo9b	0.253333	0.0289282	0.309512	1.90085e-20	1.01981e-16	0.295451	1	0.0562119	0.0369796	1	0.280617	5.80401e-25	3.36865e-21	9.70047	NA
ENSMUSG00000004698	Hdac9	1.34861	1.24733	1.29478	0.0963218	0.0838001	0.0623183	0.902571	1.00885	0.822576	0.0630389	0.123288	0.0925546	Hdac9	-4.65899	-0.522869	-3.8547	6.25536e-55	4.85603e-51	0.000864709	1	0.327578	0.664644	1	-3.81013	1.45275e-35	9.7305e-32	7.28696	NA
ENSMUSG00000004707	Ly9	1.83183	1.3472	1.77654	1.31373	1.2695	1.23507	1.99048	1.63785	2.20145	1.51022	1.61027	1.37407	Ly9	-0.384807	0.237606	-0.130597	0.00943232	1	0.0839689	1	0.240957	0.104439	1	-0.381489	0.00570086	1	-1.60555	NA
ENSMUSG00000004748	Mtfp1	3.04821	3.36123	3.12214	1.85836	1.44134	2.12215	3.6307	3.78968	3.52987	2.11065	2.33859	1.8113	Mtfp1	-0.815073	0.202139	-0.613046	2.03121e-12	8.76062e-09	0.0537196	1	0.201038	0.0977104	1	-0.816202	1.28688e-13	5.68544e-10	-4.03783	NA
ENSMUSG00000004768	Rab23	55.5693	54.2614	53.906	30.2431	28.0767	29.6066	55.5823	56.0296	54.7498	29.0221	29.2712	29.6127	Rab23	-0.896555	0.0230123	-0.897269	2.22871e-186	2.33702e-182	0.423809	1	-0.00140203	0.985327	1	-0.920971	1.53485e-200	1.63277e-196	-40.0209	NA
ENSMUSG00000004771	Rab11a	53.903	55.2268	53.607	64.4747	67.8751	67.4805	54.2099	57.8669	57.3226	68.6349	66.461	68.1639	Rab11a	0.296295	0.0579632	0.320767	1.38908e-21	7.64271e-18	0.0681098	1	0.0246277	0.416736	1	0.262959	1.20215e-17	5.98191e-14	4.53666	NA
ENSMUSG00000004788	Eif2b2	33.7411	34.7369	33.2569	30.5635	32.5274	30.1629	37.5398	41.7613	40.5744	33.7332	33.5046	31.8742	Eif2b2	-0.126708	0.236997	-0.0379039	0.00245659	1	6.13112e-09	6.40702e-05	0.0888991	0.0328591	1	-0.274807	1.18026e-11	4.84027e-08	-1.15954	NA
ENSMUSG00000004789	Dlst	138.2	138.851	136.137	113.043	112.33	114.932	137.091	138.461	139.449	109.803	111.86	109.821	Dlst	-0.279769	0.00632207	-0.317867	3.74995e-34	2.48247e-30	0.782273	1	-0.0381588	0.102296	1	-0.32425	1.78366e-45	1.30403e-41	-51.2886	NA
ENSMUSG00000004791	Pgf	1.49857	1.76332	1.36123	0.721043	0.977374	0.799047	1.52184	1.48887	1.24296	0.940587	1.00334	0.816236	Pgf	-0.919385	-0.122144	-0.741099	9.25004e-09	3.36054e-05	0.392261	1	0.155321	0.409894	1	-0.641963	4.16357e-05	0.106837	5.25579	NA
ENSMUSG00000004798	Ulk2	35.1907	33.8215	34.1872	60.6623	58.3207	58.6848	30.9287	29.0158	29.0221	57.6887	57.0839	59.1179	Ulk2	0.784394	-0.21433	0.752792	3.38043e-136	3.34494e-132	9.19887e-10	9.82072e-06	-0.0310844	0.294053	1	0.967642	4.44143e-200	4.72212e-196	-4.51472	NA
ENSMUSG00000004815	Dgkq	6.9473	7.00647	6.74362	13.1514	11.9065	12.6468	6.79399	6.20635	5.4132	11.6559	10.5322	11.0684	Dgkq	0.86912	-0.169235	0.683143	8.40584e-40	5.89754e-36	0.0231473	1	-0.182709	0.00304234	1	0.855654	1.36866e-36	9.25627e-33	-5.05602	NA
ENSMUSG00000004843	Chmp2b	56.6357	56.8248	58.5408	100.292	102.879	101.265	55.9003	57.8503	57.3226	97.7633	97.4752	97.2318	Chmp2b	0.823831	-0.007788	0.766027	1.37049e-229	1.48986e-225	0.780869	1	-0.0576717	0.0157931	1	0.773948	1.88566e-202	2.01049e-198	-99.377	NA
ENSMUSG00000004846	Plod3	491.768	499.197	489.215	291.585	284.618	282.74	505.372	524.401	513.392	318.644	318.596	307.19	Plod3	-0.785221	0.0601327	-0.648418	9.40689e-226	1.0199e-221	0.0125506	1	0.136897	2.73303e-08	0.000331926	-0.708458	3.80157e-186	3.99507e-182	-11.7816	NA
ENSMUSG00000004849	Ap1s1	240.793	240.901	239.748	151.631	152.661	156.294	222.249	241.617	239.535	160.331	163.449	159.468	Ap1s1	-0.647389	-0.0365253	-0.578196	3.8879e-111	3.66357e-107	0.199963	1	0.0691816	0.0177382	1	-0.541682	6.86957e-79	5.92432e-75	14.8303	NA
ENSMUSG00000004865	Srpk1	95.36	94.9749	95.0215	75.6716	77.9622	77.5992	101.525	102.311	102.792	77.7337	77.3099	77.7979	Srpk1	-0.303614	0.103752	-0.29342	1.8909e-37	1.29886e-33	7.15425e-06	0.0667062	0.0100926	0.679286	1	-0.397273	8.24629e-65	6.7331e-61	-3.82907	NA
ENSMUSG00000004880	Lbr	59.1351	59.6877	61.0327	39.3897	39.8822	38.0715	62.5449	61.7733	58.4661	40.0607	37.9655	40.1212	Lbr	-0.617195	0.023368	-0.606596	6.35026e-77	5.4517e-73	0.467541	1	0.0105278	0.771978	1	-0.630036	1.74941e-81	1.52304e-77	-26.9615	NA
ENSMUSG00000004885	Crabp2	1.86515	2.01299	2.09217	0.737062	0.75398	0.859188	2.15785	1.78682	2.01648	0.832818	0.760567	0.740853	Crabp2	-1.37556	-0.00283207	-1.35505	8.55986e-22	4.73274e-18	1	1	-0.0150547	1	1	-1.38784	1.46688e-22	8.18959e-19	490.046	NA
ENSMUSG00000004891	Nes	17.4615	17.06	17.2094	5.04604	4.98127	5.42991	14.5767	13.8371	14.2077	4.83567	4.96357	4.63064	Nes	-1.74612	-0.280094	-1.84249	1.28419e-264	1.42185e-260	7.44082e-11	8.1224e-07	-0.102544	0.147706	1	-1.56858	1.66932e-176	1.73693e-172	5.60019	NA
ENSMUSG00000004895	Prcc	75.9979	78.2634	76.1997	104.217	101.968	99.9416	71.4992	73.7574	76.0551	99.9033	100.373	99.6893	Prcc	0.409564	-0.0584937	0.380397	1.51168e-50	1.14374e-46	0.0391471	1	-0.0291571	0.273045	1	0.438901	1.39062e-57	1.0979e-53	-7.5034	NA
ENSMUSG00000004896	Rrnad1	26.2261	23.3185	24.4191	30.2592	29.039	29.351	22.9619	23.3714	23.7085	26.8205	27.8601	27.6678	Rrnad1	0.261797	-0.0786963	0.156419	4.82672e-11	1.96206e-07	0.0576711	1	-0.106576	0.00609139	1	0.233918	6.2409e-09	2.26046e-05	-2.97242	NA
ENSMUSG00000004897	Hdgf	675.841	684.538	669.592	264.61	266.609	262.593	705.162	728.328	730.329	275.351	265.99	271.76	Hdgf	-1.35476	0.0921264	-1.32004	0	0	5.99706e-05	0.526422	0.0346975	0.148507	1	-1.41219	0	0	-15.3288	NA
ENSMUSG00000004929	Thop1	54.0696	55.5098	53.69	21.2888	19.3644	20.6306	58.7289	62.5016	59.0714	22.1865	21.4721	20.0993	Thop1	-1.41386	0.143316	-1.35764	8.94053e-288	1.00295e-283	5.75735e-05	0.505899	0.0557805	0.198413	1	-1.5014	0	0	-10.4761	NA
ENSMUSG00000004931	Apba3	41.4726	41.7611	38.3402	41.3119	38.8168	41.2289	39.0796	38.997	41.3983	40.7843	39.407	38.9603	Apba3	-0.00180648	-0.0251982	-0.0282354	0.958413	1	0.516444	1	-0.0273179	0.482369	1	-0.00392604	0.922343	1	0.155806	NA
ENSMUSG00000004934	Pias4	37.1569	39.8136	37.6591	48.6965	44.2126	43.9503	34.2761	35.7361	33.7977	46.065	46.4626	45.1568	Pias4	0.255882	-0.143064	0.26493	9.59101e-11	3.84887e-07	0.000439818	1	0.00866929	0.825614	1	0.407617	9.62203e-25	5.56442e-21	-2.84918	NA
ENSMUSG00000004936	Map2k1	73.6318	72.2879	71.7642	99.5392	98.1535	99.9115	78.8802	82.5633	83.0671	105.554	102.922	102.659	Map2k1	0.451522	0.167746	0.515278	5.24553e-64	4.26619e-60	8.63535e-10	9.22255e-06	0.0639247	0.0128027	1	0.347701	4.35524e-40	3.03342e-36	2.07278	NA
ENSMUSG00000004937	Sgta	93.977	95.0582	91.5495	87.0928	84.5093	86.5753	89.6421	95.7226	90.9872	90.4812	89.2665	87.839	Sgta	-0.119856	-0.0218569	-0.0683573	2.67135e-05	0.0729278	0.443884	1	0.0513667	0.0707707	1	-0.0466325	0.101611	1	2.13354	NA
ENSMUSG00000004945	Tmem242	64.1173	64.548	63.1756	57.4265	54.8152	56.1589	53.6743	56.8075	57.3058	55.1022	55.3845	54.8361	Tmem242	-0.187739	-0.193354	-0.214579	1.70892e-10	6.75024e-07	6.21968e-11	6.79687e-07	-0.0269969	0.367583	1	-0.0213821	0.475508	1	0.110585	NA
ENSMUSG00000004947	Dtx2	61.5846	63.4328	63.3252	55.6164	51.808	53.9938	56.8041	57.8172	57.5076	51.746	51.5153	50.5995	Dtx2	-0.222033	-0.129926	-0.291669	2.47323e-14	1.14066e-10	8.04995e-06	0.0748162	-0.0699127	0.0187838	1	-0.16202	3.91764e-08	0.000134767	1.24702	NA
ENSMUSG00000004948	Zp3	2.58165	2.67879	2.42442	0.272525	0.221273	0.212671	1.92353	1.90269	2.11737	0.293973	0.259847	0.137785	Zp3	-3.62542	-0.376012	-3.54585	2.42266e-88	2.14987e-84	0.000731104	1	-0.0376359	1	1	-3.28735	1.16325e-65	9.5328e-62	8.74267	NA
ENSMUSG00000004952	Rasa4	44.5385	46.8877	45.9155	16.9157	17.4913	17.1725	42.427	44.5917	43.8534	19.3075	19.4389	18.1243	Rasa4	-1.41493	-0.0696139	-1.2724	0	0	0.0330893	1	0.141381	0.000757056	1	-1.20394	5.84708e-248	6.42769e-244	17.2945	NA
ENSMUSG00000004980	Hnrnpa2b1	903.505	895.679	914.324	776.369	790.157	797.007	958.158	970.89	972.421	786.654	781.063	808.837	Hnrnpa2b1	-0.199209	0.0966271	-0.191401	2.96418e-18	1.51203e-14	2.27941e-05	0.206081	0.00791902	0.729335	1	-0.287917	1.90973e-36	1.28983e-32	-2.97967	NA
ENSMUSG00000004994	Ccdc130	10.2965	10.918	11.1625	11.9821	13.0234	11.4891	10.5263	11.3873	11.265	12.8876	11.2605	12.0785	Ccdc130	0.17102	0.0354137	0.160721	0.00482431	1	0.575582	1	-0.00878215	0.878061	1	0.126824	0.0361417	1	3.58123	NA
ENSMUSG00000004996	Mri1	42.2391	40.9954	40.1676	23.7396	23.901	23.4271	42.1592	45.1214	45.3164	23.957	24.613	23.8836	Mri1	-0.797258	0.103798	-0.768062	6.22881e-108	5.82767e-104	0.0020706	1	0.0283046	0.472705	1	-0.872753	2.02766e-134	1.99847e-130	-8.40817	NA
ENSMUSG00000005034	Prkacb	239.71	241.267	248.453	210.243	201.482	204.226	230.216	224.899	222.131	216.109	209.682	216.036	Prkacb	-0.243911	-0.107104	-0.184552	1.46932e-21	8.07683e-18	2.71429e-05	0.244123	0.059292	0.0205868	1	-0.0775147	0.00242956	1	0.723731	NA
ENSMUSG00000005043	Sgsh	17.2282	17.3263	17.8573	42.9618	42.013	42.8677	22.5268	21.7823	22.6659	47.6661	46.9178	47.358	Sgsh	1.28829	0.354117	1.43749	0	0	8.19489e-21	9.77569e-17	0.150567	3.43462e-08	0.000416723	1.08474	2.07877e-278	2.32178e-274	3.06323	NA
ENSMUSG00000005045	Chd5	1.59855	1.44707	1.90944	0.785117	1.06329	0.738905	2.57627	3.14413	2.77317	1.31008	0.988166	1.08762	Chd5	-0.972376	0.788842	-0.549797	4.94853e-09	1.82304e-05	4.57929e-09	4.80505e-05	0.40949	0.0205377	1	-1.35182	1.5148e-21	8.29051e-18	-1.71368	CBP.dependent
ENSMUSG00000005054	Cstb	53.5031	56.908	54.3213	57.6508	59.2487	58.9555	45.674	51.1135	51.5885	52.7929	52.5015	50.5844	Cstb	0.0942599	-0.15093	-0.0794583	0.0144942	1	0.000113802	0.976878	-0.174058	5.9743e-06	0.0704071	0.0711327	0.0685041	1	-0.471295	NA
ENSMUSG00000005057	Sh2b2	22.577	22.1534	21.3126	25.9822	24.554	23.7729	19.4974	20.7561	20.8162	21.6784	22.4584	21.7578	Sh2b2	0.169874	-0.113054	-0.00301367	4.67324e-05	0.124448	0.00896678	1	-0.173064	2.65906e-05	0.309037	0.109865	0.0101783	1	-0.971791	NA
ENSMUSG00000005069	Pex5	94.3103	96.1567	94.5065	109.935	109.632	108.211	87.8345	91.7997	92.0298	108.833	111.146	111.223	Pex5	0.201821	-0.0690128	0.216866	1.40546e-15	6.69278e-12	0.00752597	1	0.0151659	0.544492	1	0.286	1.0479e-29	6.54939e-26	-4.14416	NA
ENSMUSG00000005078	Jkamp	17.9281	18.0587	18.339	24.2843	24.554	25.4719	16.5349	17.1145	18.5461	24.542	25.2351	24.8334	Jkamp	0.453245	-0.0579824	0.457712	3.55869e-28	2.1893e-24	0.190805	1	0.00519112	0.893105	1	0.51642	3.26836e-36	2.20287e-32	-8.9065	NA
ENSMUSG00000005087	Cd44	348.734	351.873	362.679	377.62	384.269	389.611	383.159	375.66	381.895	357.117	363.418	366.487	Cd44	0.115033	0.101403	0.0319704	1.18591e-06	0.0037036	1.88782e-05	0.171754	-0.0831692	0.000426724	1	-0.0695391	0.00325398	1	-0.685768	NA
ENSMUSG00000005102	Eif2ak4	60.0183	60.5033	59.5542	67.5022	66.7066	65.4657	60.8377	60.416	61.0557	66.0331	66.9314	67.6513	Eif2ak4	0.148818	0.0177748	0.15579	6.71075e-09	2.45479e-05	0.49942	1	0.00715489	0.783932	1	0.138198	5.8457e-08	0.00019852	7.77494	NA
ENSMUSG00000005103	Wdr1	141.216	141.098	143.496	167.265	165.395	168.563	138.012	138.494	140.576	174.787	174.07	169.238	Wdr1	0.235441	-0.0299018	0.282903	2.64628e-24	1.52823e-20	0.204226	1	0.0475828	0.0358856	1	0.312925	5.6107e-42	3.98528e-38	-10.4651	NA
ENSMUSG00000005107	Slc2a9	1.73185	1.74668	1.8596	2.27484	2.43802	1.86655	1.73942	1.57164	1.37749	1.84893	1.97443	2.02237	Slc2a9	0.299726	-0.19044	0.130751	0.0137292	1	0.155139	1	-0.166192	0.155431	1	0.323996	0.0121491	1	-1.7013	NA
ENSMUSG00000005124	Wisp1	54.103	54.2282	53.7232	11.4855	11.494	11.7447	77.8258	73.0456	71.5822	14.1192	14.0372	14.3551	Wisp1	-2.22492	0.457247	-1.93061	0	0	3.79738e-45	4.71559e-41	0.292142	2.23368e-09	2.73268e-05	-2.39003	0	0	-5.227	NA
ENSMUSG00000005125	Ndrg1	47.2546	45.0401	45.5998	7.19252	7.61044	7.21911	33.2552	34.9416	37.2617	6.96026	6.58712	6.77153	Ndrg1	-2.65283	-0.387238	-2.76274	0	0	1.37747e-21	1.64759e-17	-0.115484	0.0745364	1	-2.38108	0	0	6.14888	NA
ENSMUSG00000005142	Man2b1	48.5209	47.0708	45.334	144.231	137.093	140.522	44.3685	43.4165	45.5686	143.796	143.966	143.758	Man2b1	1.58261	-0.0797956	1.61505	0	0	0.014385	1	0.0325352	0.219391	1	1.69494	0	0	-21.241	NA
ENSMUSG00000005148	Klf5	4.78114	4.44316	5.29835	8.57011	8.71022	8.57228	6.37557	5.89185	6.23716	7.20658	7.28509	7.05799	Klf5	0.835472	0.351214	0.573012	1.06539e-37	7.34269e-34	6.1081e-07	0.00598716	-0.26331	7.441e-06	0.087563	0.22095	0.000527595	1	0.629105	NA
ENSMUSG00000005150	Wdr83	12.2461	13.215	12.5247	16.4512	15.4979	15.5336	12.0661	13.7874	12.6943	16.0898	16.1008	14.5511	Wdr83	0.322697	0.0214674	0.298378	6.37148e-09	2.33324e-05	0.717866	1	-0.0230122	0.675209	1	0.278219	4.71338e-07	0.00149367	12.9601	NA
ENSMUSG00000005161	Prdx2	229.479	235.841	227.355	134.315	136.646	135.921	198.048	212.733	220.197	140.948	140.947	136.899	Prdx2	-0.767729	-0.134612	-0.725901	1.08459e-128	1.05921e-124	1.74832e-05	0.159359	0.0416481	0.196011	1	-0.59147	2.36283e-77	2.02731e-73	4.39389	NA
ENSMUSG00000005198	Polr2a	287.415	293.998	292.625	330.686	331.6	334.131	234.434	230.626	230.808	299.861	299.872	306.21	Polr2a	0.189103	-0.328928	0.0517215	2.04089e-18	1.04473e-14	1.12953e-50	1.40717e-46	-0.137362	1.64589e-10	2.02263e-06	0.380669	6.64358e-68	5.49823e-64	-1.1573	NA
ENSMUSG00000005204	Senp3	95.1101	98.1874	93.925	97.1684	97.9817	95.8069	98.814	100.821	99.7817	99.9495	98.1732	99.5686	Senp3	0.0183832	0.060029	0.051858	0.461701	1	0.016784	1	0.0332726	0.181594	1	-0.00837332	0.738251	1	-0.139488	NA
ENSMUSG00000005225	Plekha8	25.6429	25.9983	25.2165	37.9801	38.4903	37.3949	24.3344	25.6556	24.2802	35.5036	37.8441	37.2566	Plekha8	0.56712	-0.0493021	0.524728	7.64638e-60	6.1041e-56	0.190369	1	-0.041287	0.204393	1	0.575136	4.41236e-61	3.54489e-57	-11.6655	NA
ENSMUSG00000005233	Spc25	67.1666	67.361	69.8538	20.1515	18.8317	20.8862	60.3021	63.3789	62.7372	22.2019	21.457	21.019	Spc25	-1.77085	-0.132762	-1.66006	0	0	3.17572e-05	0.284036	0.109362	0.00770045	1	-1.52872	0	0	11.5147	NA
ENSMUSG00000005262	Ufd1	70.6158	69.8411	71.216	86.3079	89.1834	88.154	66.93	67.8315	67.8996	86.8171	89.5699	85.5322	Ufd1	0.316721	-0.0627939	0.307064	2.62052e-33	1.71539e-29	0.0212593	1	-0.00932972	0.715429	1	0.370186	8.35812e-45	6.07552e-41	-5.89526	NA
ENSMUSG00000005267	Zfp287	8.93017	7.95524	8.18889	8.84242	8.72741	8.79781	8.86938	8.47405	8.00279	7.96097	7.78581	8.09828	Zfp287	0.0730609	0.0157652	-0.0709515	0.21876	1	0.804304	1	-0.145772	0.0126794	1	-0.0884754	0.13815	1	-5.61209	NA
ENSMUSG00000005299	Letm1	45.355	45.7559	45.1679	60.8385	60.7437	56.8656	47.7494	49.2761	48.9149	62.4151	61.7876	63.0076	Letm1	0.388286	0.0989116	0.458074	4.73402e-37	3.23476e-33	0.00169629	1	0.0700879	0.0173593	1	0.359463	4.60877e-33	3.00676e-29	3.63418	NA
ENSMUSG00000005312	Ubqln1	176.274	175.37	176.887	205.534	203.853	204.677	190.064	191.579	188.584	224.561	222.291	228.143	Ubqln1	0.216466	0.109579	0.352814	1.72455e-23	9.83856e-20	5.18712e-07	0.00509738	0.136486	1.31527e-10	1.61713e-06	0.243373	5.31669e-30	3.33728e-26	2.22098	NA
ENSMUSG00000005354	Txn2	127.969	132.559	124.674	74.3261	75.1612	76.1859	146.146	159.897	155.912	77.0871	75.3829	74.6318	Txn2	-0.771511	0.262222	-0.761955	2.24602e-122	2.16719e-118	1.39079e-16	1.62222e-12	0.0089579	0.790315	1	-1.02478	6.35067e-219	6.86571e-215	-3.90805	NA
ENSMUSG00000005357	Slc1a6	7.46385	7.60569	7.64069	0.897247	1.25232	1.205	6.74378	7.06709	6.96023	0.663466	0.73022	0.876543	Slc1a6	-2.79439	-0.129231	-3.3321	1.41447e-202	1.50542e-198	0.0353875	1	-0.579739	0.000290394	1	-3.24493	1.03896e-224	1.128e-220	25.1094	NA
ENSMUSG00000005360	Slc1a3	73.9983	73.9191	75.1365	2.09863	2.21463	1.95676	68.1183	67.7322	66.6888	1.87972	2.26272	2.65559	Slc1a3	-5.17709	-0.139233	-5.05038	0	0	7.27497e-08	0.000737755	0.123867	0.258176	1	-4.91403	0	0	35.2936	NA
ENSMUSG00000005362	Crbn	26.5427	24.75	26.0804	40.2387	43.3362	41.8303	24.9871	23.8845	24.0279	40.692	38.8759	39.2769	Crbn	0.696806	-0.0860614	0.619531	3.81856e-79	3.30229e-75	0.0324589	1	-0.0771334	0.0268605	1	0.705736	1.17753e-79	1.01856e-75	-8.20037	NA
ENSMUSG00000005370	Msh6	92.6273	88.1339	89.6058	48.9367	46.309	47.4084	98.2449	95.1433	95.3929	51.2533	51.0449	51.6247	Msh6	-0.922439	0.0950807	-0.812418	1.42358e-222	1.54032e-218	0.000500907	1	0.109381	0.000349356	1	-0.90814	3.49279e-224	3.79143e-220	-9.55125	NA
ENSMUSG00000005371	Fbxo11	68.1997	68.4096	69.3554	99.5712	95.5415	98.9944	74.4784	74.7505	73.8691	100.088	97.5208	100.835	Fbxo11	0.514546	0.115341	0.534953	2.3198e-86	2.04769e-82	1.97894e-05	0.179728	0.0207067	0.404577	1	0.419912	1.03293e-59	8.23763e-56	3.64061	NA
ENSMUSG00000005374	Tbl2	71.6322	70.4736	69.7541	27.0555	25.774	25.5621	68.2355	67.2522	69.6147	29.1761	29.256	29.3866	Tbl2	-1.43553	-0.0468389	-1.27043	0	0	0.0786837	1	0.164182	1.47286e-06	0.0175476	-1.22451	0	0	26.1431	NA
ENSMUSG00000005378	Bud23	28.4923	30.2594	26.4624	23.9959	23.5229	23.6376	29.3387	31.2007	30.4851	24.619	24.5371	23.0996	Bud23	-0.260293	0.095345	-0.236432	5.54728e-09	2.03807e-05	0.029454	1	0.0219408	0.629295	1	-0.333698	3.39466e-14	1.52896e-10	-3.4999	NA
ENSMUSG00000005397	Nid1	322.99	321.03	330.916	188.458	187.58	186.064	355.308	342.439	342.631	186.904	186.148	192.29	Nid1	-0.794626	0.0937289	-0.786211	1.08875e-230	1.18434e-226	9.12657e-05	0.790635	0.00836472	0.739223	1	-0.879991	9.33024e-285	1.04508e-280	-9.38868	NA
ENSMUSG00000005410	Mcm5	164.227	165.017	162.251	46.582	46.4293	48.4308	177.294	180.935	181.354	53.8244	53.4423	53.1324	Mcm5	-1.79688	0.134695	-1.6155	0	0	3.23517e-09	3.40469e-05	0.180787	2.28245e-10	2.80398e-06	-1.75079	0	0	-12.9982	NA
ENSMUSG00000005413	Hmox1	65.4503	67.1779	64.8203	157.206	154.517	159.737	83.0644	85.3276	84.9841	187.458	182.006	176.942	Hmox1	1.25627	0.359968	1.46826	0	0	1.45821e-34	1.79316e-30	0.212607	3.43086e-16	4.27623e-12	1.10891	0	0	3.08057	NA
ENSMUSG00000005417	Mprip	259.372	266.851	262.208	317.07	302.662	304.421	256.058	257.077	260.958	318.659	325.378	318.452	Mprip	0.229205	-0.0264862	0.287815	5.15534e-21	2.79677e-17	0.281072	1	0.0586157	0.0151682	1	0.314306	3.30152e-38	2.26914e-34	-11.8668	NA
ENSMUSG00000005442	Cic	202.452	205.098	196.855	182.996	174.571	175.148	195.855	189.195	193.646	177.174	179.472	179.671	Cic	-0.182143	-0.0627348	-0.172247	1.66127e-12	7.19829e-09	0.0148851	1	0.00970438	0.708082	1	-0.109704	2.09086e-05	0.0555332	1.74869	NA
ENSMUSG00000005447	Pafah1b3	35.474	37.5999	36.9614	28.2568	28.8328	28.7195	31.4978	33.9319	34.6722	29.6071	29.5443	29.2057	Pafah1b3	-0.359189	-0.136626	-0.316145	1.7289e-22	9.70776e-19	0.000170444	1	0.0423054	0.261998	1	-0.180258	1.06007e-06	0.00325123	1.31935	NA
ENSMUSG00000005469	Prkaca	179.974	181.246	178.714	212.822	203.904	200.588	145.627	157.828	155.021	214.724	207.512	207.412	Prkaca	0.193202	-0.235956	0.221597	1.26116e-10	5.02825e-07	8.34694e-15	9.59981e-11	0.0285746	0.338545	1	0.457732	5.54332e-52	4.24286e-48	-1.93991	NA
ENSMUSG00000005470	Asf1b	46.9713	49.7507	47.6764	15.3459	14.759	15.4284	46.7452	47.3726	50.1424	16.136	15.5394	15.1391	Asf1b	-1.66608	-0.00145282	-1.62509	0	0	0.971404	1	0.0389433	0.399777	1	-1.62568	0	0	1118.99	NA
ENSMUSG00000005481	Ddx39	59.535	60.5532	57.6437	35.6734	37.1671	37.2295	64.1684	71.3572	70.0519	38.983	40.7726	38.7945	Ddx39	-0.691726	0.210129	-0.58427	9.45172e-72	7.96308e-68	1.36764e-08	0.000141701	0.107173	0.00703577	1	-0.794683	4.29296e-98	3.91947e-94	-3.78188	NA
ENSMUSG00000005483	Dnajb1	67.7998	68.5428	68.9235	71.0423	71.4322	71.54	68.8213	72.5159	70.1865	76.6714	74.6394	75.3253	Dnajb1	0.0602522	0.0434122	0.142826	0.0235271	1	0.105231	1	0.082637	0.00149347	1	0.0994769	0.000143362	0.340627	2.29145	NA
ENSMUSG00000005501	Usp40	65.8502	67.4276	67.0463	87.269	83.3923	86.9962	68.7041	65.0838	66.0667	78.5651	82.3626	85.1553	Usp40	0.363626	-0.00342434	0.296096	7.3235e-30	4.60575e-26	0.920042	1	-0.0665908	0.0342226	1	0.300459	6.66492e-21	3.59906e-17	-87.7423	NA
ENSMUSG00000005505	Kbtbd4	3.38147	2.86189	3.08891	3.82863	3.21131	3.49036	3.22901	2.91239	2.67228	3.3115	3.50694	3.24359	Kbtbd4	0.177841	-0.0831526	0.111191	0.0698755	1	0.424679	1	-0.0681662	0.479143	1	0.192834	0.0520524	1	-2.31903	NA
ENSMUSG00000005506	Celf1	54.3196	53.7454	55.4675	78.0103	70.0919	72.1113	63.683	55.5495	55.8933	73.192	72.9855	75.9435	Celf1	0.429688	0.0988319	0.441654	1.08756e-21	5.99572e-18	0.0297368	1	0.0123105	0.780792	1	0.343167	1.5347e-14	7.00589e-11	3.47223	NA
ENSMUSG00000005510	Ndufs3	55.0361	57.3907	56.7301	66.6692	67.7892	70.1567	54.076	58.4959	58.2307	68.8351	67.9783	64.5153	Ndufs3	0.274979	0.0140002	0.250851	2.39831e-15	1.13488e-11	0.694791	1	-0.0237521	0.490677	1	0.237227	7.06112e-12	2.92895e-08	16.9445	NA
ENSMUSG00000005514	Por	154.663	154.947	152.018	106.86	98.0332	100.468	149.226	151.985	151.22	110.157	111.753	108.645	Por	-0.596128	-0.0290288	-0.481883	6.00612e-99	5.4956e-95	0.295219	1	0.114168	6.63445e-05	0.761104	-0.452931	1.2198e-58	9.68521e-55	15.6028	NA
ENSMUSG00000005533	Igf1r	131.502	126.933	131.502	103.143	97.5864	99.1297	129.56	121.809	117.774	98.333	102.847	103.564	Igf1r	-0.378945	-0.0790712	-0.355824	1.76703e-29	1.10669e-25	0.0178407	1	0.0232576	0.492713	1	-0.276617	1.78222e-16	8.61346e-13	3.49832	NA
ENSMUSG00000005534	Insr	55.9859	54.5444	57.5773	95.4224	95.215	96.8895	57.1723	52.3052	52.362	87.3867	89.4637	94.126	Insr	0.774739	-0.0548889	0.688439	2.63026e-108	2.46298e-104	0.134069	1	-0.0855967	0.0115635	1	0.744032	2.43176e-99	2.22749e-95	-13.5552	NA
ENSMUSG00000005566	Trim28	328.372	332.165	321.979	203.019	196.206	197.521	310.135	322.228	320.838	211.429	208.635	208.091	Trim28	-0.719403	-0.0436962	-0.645278	2.81927e-190	2.967e-186	0.0691503	1	0.0739535	0.0028032	1	-0.601754	1.06702e-134	1.05241e-130	13.7713	NA
ENSMUSG00000005575	Ube2m	98.7592	97.2387	93.7091	122.43	114.324	114.811	99.768	104.38	104.81	124.167	120.706	120.691	Ube2m	0.279333	0.0928572	0.335747	2.683e-19	1.40213e-15	0.00311174	1	0.0562671	0.065766	1	0.242743	3.58031e-15	1.66699e-11	2.61415	NA
ENSMUSG00000005580	Adcy9	7.01395	6.52377	7.24199	16.1629	14.0029	15.1126	6.69357	5.51115	5.36276	14.7504	15.8884	15.4256	Adcy9	1.12796	-0.24352	1.14917	6.39876e-60	5.10941e-56	0.0021261	1	0.0240631	0.704643	1	1.39555	9.40987e-89	8.3842e-85	-5.73073	NA
ENSMUSG00000005609	Ctr9	93.5271	93.9929	94.8886	70.9462	71.8103	70.3672	92.3702	87.2643	92.3661	69.8666	66.1424	68.7669	Ctr9	-0.406486	-0.0542724	-0.464093	1.80281e-45	1.32254e-41	0.0551765	1	-0.0574826	0.049857	1	-0.409696	5.07742e-46	3.73343e-42	7.54888	NA
ENSMUSG00000005610	Eif4g2	931.515	938.107	951.237	701.322	691.847	698.571	968.652	932.902	944.743	694.018	693.892	707.25	Eif4g2	-0.431428	0.0129473	-0.429077	7.77926e-81	6.75473e-77	0.565969	1	0.0023423	0.9179	1	-0.442033	6.74141e-85	5.9257e-81	-34.141	NA
ENSMUSG00000005615	Pcyt1a	48.6876	46.8045	50.5005	121.709	121.3	121.412	45.6405	44.3104	44.6606	119.256	120.068	121.882	Pcyt1a	1.32024	-0.117218	1.30756	0	0	0.000134336	1	-0.0127686	0.610551	1	1.42469	0	0	-12.1542	NA
ENSMUSG00000005621	Zfp592	38.1234	37.8828	39.3536	64.5227	63.476	62.0076	40.8036	37.1431	38.876	62.138	63.487	65.0581	Zfp592	0.720093	0.0180662	0.724983	5.43783e-103	5.03271e-99	0.613047	1	0.00545553	0.870047	1	0.707483	1.61855e-100	1.4868e-96	39.1607	NA
ENSMUSG00000005625	Psmd4	141.799	142.912	138.679	151.231	152.472	150.896	140.456	152.73	147.655	153.926	151.947	147.286	Psmd4	0.102573	0.0583227	0.0979039	0.000386393	0.905704	0.0444721	1	-0.00455119	0.874963	1	0.0396989	0.167896	1	0.680677	NA
ENSMUSG00000005656	Snx6	56.7524	57.141	57.1288	58.1314	60.8812	57.7376	55.599	58.529	56.6332	61.9532	59.3295	61.2587	Snx6	0.0468113	-0.00213389	0.0938072	0.117538	1	0.946629	1	0.0472336	0.113788	1	0.0961788	0.00126151	1	-45.0722	NA
ENSMUSG00000005667	Mthfd2	123.453	128.531	123.096	49.2731	50.5192	49.9042	267.64	273.861	270.156	61.2296	61.1352	60.2938	Mthfd2	-1.32589	1.11387	-1.0378	0	0	0	0	0.287446	3.46698e-23	4.34551e-19	-2.15232	0	0	-1.93229	CBP.dependent
ENSMUSG00000005674	Tomm40l	9.92994	8.58774	9.21886	7.12844	7.12928	6.88833	7.69779	8.17611	7.63285	7.03723	7.86167	7.40476	Tomm40l	-0.393614	-0.239335	-0.313452	1.05011e-09	4.00825e-06	0.000178618	1	0.0782295	0.244434	1	-0.0760498	0.248819	1	0.317754	NA
ENSMUSG00000005682	Pan2	23.4601	22.453	23.439	29.0257	29.0562	28.2384	21.874	21.8651	22.3464	27.4826	28.1636	28.9494	Pan2	0.315518	-0.0697562	0.286617	4.30819e-19	2.24112e-15	0.063369	1	-0.0283668	0.397102	1	0.356908	9.33386e-24	5.31096e-20	-5.11651	NA
ENSMUSG00000005683	Cs	200.486	203.467	198.45	176.14	176.822	180.35	204.525	202.305	206.173	180.699	182.673	177.168	Cs	-0.175627	0.0251572	-0.156362	2.35031e-14	1.0849e-10	0.272457	1	0.0192667	0.402272	1	-0.181518	2.40243e-15	1.1241e-11	-7.21533	NA
ENSMUSG00000005686	Ampd3	3.63141	3.77736	3.43777	0.929284	1.01174	0.889258	2.89427	3.24344	2.9077	0.417137	0.563314	0.680546	Ampd3	-1.97708	-0.263948	-2.73467	1.43344e-61	1.15378e-57	0.00479369	1	-0.796464	1.50422e-05	0.175813	-2.5096	4.8927e-73	4.12161e-69	9.50797	NA
ENSMUSG00000005687	Bcas2	83.0462	80.5271	82.3463	83.1523	85.7294	84.7259	91.6003	97.3117	94.6194	88.0333	85.7007	86.6781	Bcas2	0.0442845	0.205444	0.0826439	0.110834	1	9.69197e-14	1.10236e-09	0.0383219	0.163657	1	-0.122838	6.64513e-06	0.0187792	-0.597914	NA
ENSMUSG00000005698	Ctcf	107.191	106.726	104.308	100.805	99.2189	100.197	113.459	111.365	108.29	106.092	105.73	107.047	Ctcf	-0.0839223	0.0660205	0.0029997	0.00078949	1	0.00799574	1	0.0868585	0.000464156	1	-0.0630844	0.0106424	1	-0.955528	NA
ENSMUSG00000005699	Pard6a	7.5305	7.02312	7.5244	11.7898	11.2191	11.6846	8.04926	9.58308	8.92764	11.9946	11.9281	11.2192	Pard6a	0.655002	0.267921	0.670689	1.01678e-26	6.12202e-23	3.54031e-05	0.315796	0.017608	0.75648	1	0.404689	6.88593e-12	2.85835e-08	1.51047	NA
ENSMUSG00000005718	Tfap4	17.1949	17.8923	17.0433	3.47623	3.24568	3.70085	20.7861	21.4844	20.7153	3.72719	3.74971	3.28882	Tfap4	-2.32857	0.273444	-2.27796	0	0	8.26327e-11	9.01275e-07	0.042728	0.60142	1	-2.55931	0	0	-9.35951	NA
ENSMUSG00000005732	Ranbp1	36.3904	37.3169	36.0644	15.394	15.5151	15.0675	37.6737	41.5461	39.4814	16.6903	16.6015	17.0538	Ranbp1	-1.25781	0.113045	-1.12452	2.01361e-211	2.1598e-207	0.00197526	1	0.131894	0.0040193	1	-1.23896	3.21064e-218	3.46974e-214	-10.9599	NA
ENSMUSG00000005774	Rfx5	26.1762	23.8678	25.9807	21.7854	20.0345	20.6005	23.3636	20.7064	22.5482	18.4607	17.8457	17.7625	Rfx5	-0.284404	-0.190968	-0.490629	4.28503e-09	1.58289e-05	7.96026e-05	0.692622	-0.208067	3.0662e-05	0.355833	-0.301502	1.26628e-09	4.74857e-06	1.57881	NA
ENSMUSG00000005779	Psmb4	222.714	227.003	222.072	245.532	244.39	240.416	212.977	230.709	224.939	250.857	251.909	240.988	Psmb4	0.120516	-0.00678912	0.146601	2.36956e-05	0.0650445	0.813152	1	0.0263037	0.354457	1	0.153609	6.78955e-08	0.000229679	-22.6258	NA
ENSMUSG00000005802	Slc30a4	22.6936	21.5541	23.7048	17.6366	17.1132	16.7064	29.5396	24.2818	25.3396	15.9051	16.996	17.0538	Slc30a4	-0.402056	0.220432	-0.44355	2.84934e-11	1.17022e-07	0.000173206	1	-0.04242	0.492543	1	-0.66491	5.96178e-29	3.69034e-25	-3.0164	NA
ENSMUSG00000005803	Sqor	81.2133	78.1136	79.1899	46.8543	47.0651	47.0626	71.1477	74.9491	74.6258	43.5863	42.6086	43.2873	Sqor	-0.758957	-0.111868	-0.881215	1.01814e-154	1.03372e-150	4.76466e-05	0.421148	-0.122868	5.98944e-05	0.68829	-0.769958	1.55126e-155	1.57375e-151	6.88276	NA
ENSMUSG00000005804	Bloc1s6	45.1884	45.4896	45.1347	44.4836	45.6561	43.9052	44.4355	46.5615	45.7367	43.9404	43.1851	43.6341	Bloc1s6	-0.0196711	0.00982383	-0.0547284	0.509452	1	0.740757	1	-0.035097	0.219824	1	-0.0645919	0.0256178	1	-6.57503	NA
ENSMUSG00000005813	Metap1	79.947	79.0624	83.6752	91.6421	93.7887	95.9122	92.4037	91.5017	90.9704	94.8536	97.5359	97.1413	Metap1	0.213524	0.17975	0.254962	1.54088e-14	7.14968e-11	1.20963e-10	1.31499e-06	0.0412259	0.129117	1	0.0750003	0.00609573	1	0.417249	NA
ENSMUSG00000005823	Gpr108	44.5885	43.6253	43.9884	74.8547	77.2576	73.0134	43.7325	47.356	45.9722	76.5021	77.6285	76.9234	Gpr108	0.767768	0.0521922	0.805516	9.61111e-136	9.50634e-132	0.113989	1	0.0381565	0.195864	1	0.753733	1.91576e-133	1.88454e-129	14.4415	NA
ENSMUSG00000005836	Gata6	33.841	34.5538	35.0012	13.9043	14.3294	13.3836	30.1588	28.5689	29.1735	14.5041	15.3876	12.7268	Gata6	-1.31604	-0.234505	-1.28297	2.62905e-166	2.7024e-162	1.70499e-07	0.00170499	0.0353438	0.518561	1	-1.04619	8.73732e-104	8.08552e-100	4.46128	NA
ENSMUSG00000005846	Rsl1d1	150.414	156.894	155.906	92.6672	92.2937	92.1533	184.758	188.467	185.961	97.5478	97.7939	97.0508	Rsl1d1	-0.741408	0.271709	-0.66353	2.74051e-205	2.92412e-201	7.2412e-32	8.87265e-28	0.0774593	0.00200287	1	-0.935658	0	0	-3.44361	NA
ENSMUSG00000005871	Apc	115.322	115.115	117.93	168.066	156.837	156.324	125.744	108.567	111.973	153.911	152.524	159.303	Apc	0.466213	-0.00868588	0.418742	8.879e-30	5.58134e-26	0.835683	1	-0.0472008	0.246693	1	0.427699	2.45692e-25	1.43558e-21	-49.2407	NA
ENSMUSG00000005873	Reep5	116.255	118.777	114.175	250.786	261.128	261.285	125.476	130.45	132.152	268.5	270.603	265.397	Reep5	1.14696	0.1523	1.20415	0	0	3.4767e-08	0.000356014	0.0572618	0.0254252	1	1.05192	0	0	6.90691	NA
ENSMUSG00000005881	Ergic3	154.596	155.429	151.138	198.021	196.756	200.377	156.172	167.097	166.724	212.891	208.893	206.342	Ergic3	0.368143	0.0875179	0.445763	1.39625e-41	9.95384e-38	0.00148221	1	0.0776893	0.00372712	1	0.358315	5.25497e-40	3.65588e-36	4.09419	NA
ENSMUSG00000005882	Uqcc1	37.9401	39.3476	40.1178	44.1152	45.4498	44.8674	39.0294	43.3669	42.9958	44.6332	44.399	43.4833	Uqcc1	0.195336	0.0950569	0.174956	1.09961e-07	0.000372546	0.0107351	1	-0.0206084	0.569285	1	0.0796711	0.028925	1	0.838141	NA
ENSMUSG00000005886	Ncoa2	57.8521	53.5457	58.1587	78.2186	76.1578	76.8324	57.8585	51.0307	51.8576	74.1927	75.565	79.1246	Ncoa2	0.447688	-0.0770661	0.433329	1.37337e-27	8.38165e-24	0.0671308	1	-0.0145996	0.719188	1	0.510155	3.13012e-35	2.08716e-31	-6.61971	NA
ENSMUSG00000005893	Nr2c2	34.4742	32.673	33.938	37.6597	33.9709	34.2826	41.3057	31.1676	32.2339	30.6233	31.4106	34.4071	Nr2c2	0.0674228	0.0507862	-0.0693089	0.362291	1	0.493376	1	-0.135271	0.0666362	1	-0.118634	0.108218	1	-2.33595	NA
ENSMUSG00000005897	Nr2c1	13.2625	12.7157	13.8869	13.2315	14.106	14.0752	13.7398	14.0854	14.3759	13.6111	14.0676	13.2394	Nr2c1	0.0549517	0.0822729	0.0381047	0.259622	1	0.0916615	1	-0.0173382	0.722364	1	-0.0446597	0.352945	1	-0.542823	NA
ENSMUSG00000005899	Smpd4	65.1171	62.8502	62.7105	58.2435	56.5336	56.9407	56.6033	58.9263	58.8865	54.5018	54.9445	54.037	Smpd4	-0.151035	-0.128635	-0.221812	6.77555e-08	0.000233485	4.63313e-06	0.0436487	-0.0710748	0.0119551	1	-0.0934743	0.000967601	1	0.726662	NA
ENSMUSG00000005907	Pex1	7.64714	7.67227	7.7902	17.7327	18.1787	17.7438	7.01157	7.08364	6.53984	16.6749	17.5271	17.0689	Pex1	1.21783	-0.163844	1.14939	1.89563e-148	1.90776e-144	0.00621856	1	-0.0649473	0.104563	1	1.31673	1.18581e-165	1.22019e-161	-8.0365	NA
ENSMUSG00000005917	Otx1	6.03085	5.24211	5.87978	5.95909	6.57939	6.12153	4.66839	5.57736	4.37064	6.00573	6.34434	6.12324	Otx1	0.120711	-0.231524	0.109278	0.133709	1	0.00586892	1	-0.0130709	0.871928	1	0.33917	3.38934e-05	0.0879195	-1.46494	NA
ENSMUSG00000005936	Kctd20	85.629	87.5014	88.4928	98.5621	98.6003	99.1297	88.3701	84.4503	84.4628	91.328	96.1552	95.1964	Kctd20	0.179632	-0.0241655	0.111455	7.30379e-11	2.94854e-07	0.389648	1	-0.0678499	0.0126872	1	0.135947	8.58015e-07	0.00265556	-5.62567	NA
ENSMUSG00000005949	Ctns	11.8462	13.1152	13.5214	49.2571	46.3434	48.7315	12.2502	12.7281	11.5172	44.4177	44.6873	43.1818	Ctns	1.91012	-0.076485	1.78351	0	0	0.144061	1	-0.126428	0.000520461	1	1.86018	0	0	-24.3209	NA
ENSMUSG00000005950	P2rx5	1.19864	0.864494	1.0456	6.72798	6.30445	6.82819	0.668253	0.777113	0.721683	6.8217	7.64925	7.16353	P2rx5	2.71339	-0.539041	2.81015	1.00475e-148	1.01158e-144	0.0017973	1	0.122471	0.0782472	1	3.37502	2.52281e-203	2.69209e-199	-6.26115	NA
ENSMUSG00000005951	Shpk	1.14865	1.19739	1.09544	7.41678	7.28394	7.26421	1.1871	1.43922	1.31022	7.09882	6.2533	6.51523	Shpk	2.70662	0.199332	2.52822	2.92791e-171	3.02453e-167	0.190015	1	-0.145792	0.0270386	1	2.36154	1.7502e-135	1.7285e-131	11.8473	NA
ENSMUSG00000005958	Ephb3	53.0865	53.8287	54.1053	16.5473	15.1199	15.4133	47.3812	50.1203	47.9228	18.4607	17.9823	17.8831	Ephb3	-1.77553	-0.146969	-1.56762	0	0	2.02225e-06	0.0193913	0.206274	1.10745e-06	0.0132241	-1.42229	0	0	9.67744	NA
ENSMUSG00000005968	Tuft1	4.24793	5.02573	5.51431	11.5816	10.8239	11.0832	4.4006	4.00486	3.96707	9.99318	10.3804	10.4955	Tuft1	1.18451	-0.259208	1.06972	1.11271e-67	9.20437e-64	0.00184342	1	-0.118135	0.0537091	1	1.3256	3.52813e-75	2.99961e-71	-5.11403	NA
ENSMUSG00000005973	Rcn1	243.259	238.454	242.157	161.435	170.602	165.51	240.258	245.49	246.8	173.186	176.24	176.535	Rcn1	-0.541203	0.0171958	-0.460775	3.68552e-106	3.4338e-102	0.480477	1	0.0803828	0.00132021	1	-0.478017	3.09529e-84	2.71395e-80	-27.7984	NA
ENSMUSG00000005980	Dnase1	2.48168	2.41247	2.42442	3.1078	3.05665	3.08441	2.5428	2.36616	2.05011	2.6187	2.99104	3.21343	Dnase1	0.341736	-0.073274	0.264716	0.000797082	1	0.527143	1	-0.0680592	0.491272	1	0.346961	0.000760039	1	-4.73512	NA
ENSMUSG00000005981	Trap1	117.938	120.691	118.312	79.1156	73.8724	75.2387	132.74	139.123	134.741	76.3173	75.6712	75.1896	Trap1	-0.645202	0.188019	-0.651815	5.92149e-115	5.62482e-111	5.81536e-12	6.46261e-08	-0.00689596	0.818845	1	-0.840118	2.30375e-198	2.4445e-194	-4.46825	NA
ENSMUSG00000005982	Naa60	24.4765	24.4337	24.0537	34.6002	34.0224	34.5833	26.8616	29.0654	27.5256	34.7339	35.3405	34.6785	Naa60	0.501141	0.194191	0.521726	5.56989e-49	4.17073e-45	5.23453e-08	0.000533817	0.0211581	0.505667	1	0.328109	2.90172e-23	1.63976e-19	1.68962	NA
ENSMUSG00000005983	1700037C18Rik	3.69806	3.51104	3.42116	3.07576	3.15976	3.14455	3.88176	3.77313	3.41216	3.41927	3.88627	2.94205	1700037C18Rik	-0.182249	0.0588235	-0.061418	0.0694653	1	0.561297	1	0.128635	0.190616	1	-0.112444	0.243915	1	-1.91154	NA
ENSMUSG00000005986	Ankrd13d	5.33101	5.2754	5.08239	7.70511	6.97463	7.41457	4.06586	4.17039	3.91663	7.36054	6.96645	6.68107	Ankrd13d	0.497962	-0.370638	0.420373	9.45341e-14	4.28334e-10	1.40463e-06	0.0135561	-0.075	0.237643	1	0.793612	4.84826e-29	3.00544e-25	-2.1412	NA
ENSMUSG00000006005	Tpr	211.483	210.125	215.228	219.806	210.864	215.277	232.576	204.953	213.253	210.105	206.708	224.509	Tpr	0.0205482	0.0312366	0.00927492	0.590153	1	0.412175	1	-0.0104013	0.785162	1	-0.0210898	0.579123	1	-0.675163	NA
ENSMUSG00000006010	Odr4	34.0077	32.4899	33.1406	37.7398	38.9886	37.4701	34.7782	33.8988	36.3201	37.6744	37.7531	38.8698	Odr4	0.196244	0.0755098	0.198128	4.99707e-09	1.84042e-05	0.0274946	1	0.00202998	0.96462	1	0.122764	0.000217849	0.50432	1.6258	NA
ENSMUSG00000006019	Dhx34	25.8596	26.1981	25.2996	16.5313	15.2574	16.7064	23.6314	25.5729	25.4068	16.6441	15.4483	15.4859	Dhx34	-0.672944	-0.0521472	-0.701954	5.55759e-51	4.21766e-47	0.225096	1	-0.0295878	0.554949	1	-0.650386	1.51942e-47	1.12999e-43	12.4721	NA
ENSMUSG00000006021	Kptn	6.44742	6.50713	6.76023	11.3573	11.0473	10.7825	6.45925	6.73604	7.01068	10.9631	11.655	11.1589	Kptn	0.753411	0.0355522	0.776588	1.19269e-41	8.5063e-38	0.58516	1	0.0262137	0.609578	1	0.744077	5.32396e-42	3.78374e-38	20.9292	NA
ENSMUSG00000006024	Napa	114.589	116.513	111.086	154.018	153.95	149.844	117.978	126.428	126.35	153.957	155.134	150.302	Napa	0.41992	0.115731	0.42509	6.73603e-47	4.98803e-43	9.14475e-05	0.792118	0.00510697	0.861733	1	0.309296	1.52534e-26	9.0971e-23	2.67255	NA
ENSMUSG00000006050	Sra1	64.1006	67.3111	64.6541	92.3789	93.2388	92.2887	60.5867	64.339	66.1171	90.1117	89.9038	89.4371	Sra1	0.50336	-0.0374722	0.459015	3.51694e-64	2.86314e-60	0.2261	1	-0.0444958	0.123014	1	0.496337	2.69743e-62	2.17764e-58	-13.2455	NA
ENSMUSG00000006057	Atp5g1	139.116	138.635	133.927	93.0517	91.95	94.9349	158.967	171.55	171.281	101.751	100.859	99.1767	Atp5g1	-0.556308	0.285663	-0.447861	9.44296e-75	8.04068e-71	5.0369e-22	6.03723e-18	0.10818	0.000436595	1	-0.733793	1.28727e-132	1.26423e-128	-2.56873	NA
ENSMUSG00000006058	Snf8	52.37	52.1309	52.0786	77.2895	80.1961	80.8318	51.7328	56.7579	52.8497	82.1214	81.3308	79.4262	Snf8	0.606335	0.0433684	0.633201	5.69399e-80	4.93498e-76	0.194908	1	0.0272572	0.375311	1	0.590225	4.99219e-77	4.27681e-73	13.6096	NA
ENSMUSG00000006095	Tbcb	31.4249	31.0251	28.8878	25.7099	26.8223	25.8779	31.1463	33.9319	33.4951	27.4672	26.5552	26.7632	Tbcb	-0.220974	0.110178	-0.176285	6.37623e-08	0.000220171	0.00584064	1	0.043626	0.292684	1	-0.287526	6.88322e-13	2.95703e-09	-2.60966	NA
ENSMUSG00000006127	Inpp5k	7.03062	7.27279	7.49118	21.2247	20.5844	20.8862	6.76052	7.08364	6.37169	18.5839	20.0155	18.6067	Inpp5k	1.52857	-0.108661	1.39181	2.87213e-210	3.07749e-206	0.08981	1	-0.132618	0.00182327	1	1.50462	3.22324e-194	3.4089e-190	-13.8469	NA
ENSMUSG00000006134	Crkl	108.907	111.62	111.584	111.185	112.107	113.594	109.526	103.055	104.322	109.31	109.144	114.57	Crkl	0.0206962	-0.0676737	0.00368759	0.465458	1	0.0172286	1	-0.0166893	0.553744	1	0.0716806	0.011183	1	-1.05921	NA
ENSMUSG00000006154	Eps8l1	0.382166	0.498306	0.514005	1.40984	1.44134	1.44556	0.467409	0.479167	0.43582	1.26389	1.47371	1.52484	Eps8l1	1.68958	-0.0132804	1.61959	1.60977e-21	8.84086e-18	1	1	-0.0109845	0.967486	1	1.692	9.56639e-22	5.25673e-18	-127.406	NA
ENSMUSG00000006169	Clint1	157.096	155.113	158.198	181.698	176.169	174.757	164.59	158.407	160.032	177.805	174.055	177.123	Clint1	0.179198	0.0381896	0.169299	2.94977e-13	1.31331e-09	0.12315	1	-0.00986532	0.685236	1	0.131143	8.37281e-08	0.000281243	3.43399	NA
ENSMUSG00000006179	Prss16	0.115562	0.148762	0.165146	1.15354	1.01174	1.22003	0.0991957	0.0653529	0.0826943	0.832818	1.10955	0.98208	Prss16	3.2862	-1.11477	2.77344	3.23588e-35	2.16998e-31	0.0632428	1	-0.221584	0.179322	1	4.18137	1.52442e-37	1.04148e-33	-3.75089	NA
ENSMUSG00000006191	Cdkal1	14.7455	15.2957	15.4319	14.3047	14.7247	15.263	16.0328	14.8468	15.1157	13.9806	14.7504	15.5311	Cdkal1	-0.0373318	0.0164032	-0.039989	0.447073	1	0.744564	1	-0.00137602	0.988837	1	-0.0551112	0.257665	1	-3.35978	NA
ENSMUSG00000006205	Htra1	15.7786	16.1778	16.5781	6.90419	7.64481	7.76038	16.5851	18.6373	16.7805	8.73075	7.93754	8.11336	Htra1	-1.12428	0.0999685	-0.970651	7.71928e-81	6.70342e-77	0.0632231	1	0.15165	0.0206934	1	-1.07261	2.19264e-78	1.88808e-74	-10.7295	NA
ENSMUSG00000006215	Zbtb17	27.2259	27.9791	25.9475	31.6047	30.0873	29.5465	25.8072	26.1687	27.0043	30.4077	29.5292	29.3715	Zbtb17	0.168933	-0.0392158	0.138691	6.99813e-06	0.0204275	0.313031	1	-0.0307029	0.404211	1	0.177447	2.40555e-06	0.00712523	-4.52488	NA
ENSMUSG00000006219	Fblim1	40.2895	39.2311	40.7989	11.2292	11.4597	10.7524	41.0044	41.5792	39.061	12.8106	12.8689	13.3751	Fblim1	-1.8516	0.015917	-1.62339	0	0	0.641594	1	0.226164	3.82185e-06	0.0452048	-1.64135	0	0	-103.119	NA
ENSMUSG00000006241	Ccdc159	7.03062	5.84133	6.64395	6.1353	6.39037	5.71558	6.15799	6.04083	6.77526	6.42141	5.82845	6.40969	Ccdc159	-0.100133	-0.0410496	-0.0619102	0.200802	1	0.603526	1	0.0350226	0.666511	1	-0.0240616	0.762601	1	0.58616	NA
ENSMUSG00000006262	Mob1b	56.6524	57.6071	59.6372	63.9301	65.4178	65.7815	63.4487	61.2933	61.7115	61.1219	62.607	66.6864	Mob1b	0.166315	0.100602	0.130269	4.08517e-07	0.00132564	0.00235886	1	-0.035213	0.276858	1	0.0305007	0.351831	1	0.303182	NA
ENSMUSG00000006273	Atp6v1b2	80.0636	80.9266	78.9075	221.472	218.992	218.735	83.4996	82.6626	81.9741	207.349	204.659	205.814	Atp6v1b2	1.45864	0.0487455	1.36483	0	0	0.0517116	1	-0.0935424	8.79918e-06	0.103382	1.31636	0	0	27.0047	NA
ENSMUSG00000006276	Eps15l1	78.0974	77.1149	75.3026	78.8913	75.5392	77.509	75.8173	76.9686	76.0719	77.6259	75.307	77.8883	Eps15l1	0.00924874	-0.0103794	0.00191531	0.738354	1	0.702996	1	-0.00733024	0.790797	1	0.0122979	0.648009	1	-1.18484	NA
ENSMUSG00000006281	Tep1	2.86492	2.61221	3.17197	1.45789	1.75066	1.98683	2.32522	2.20063	2.35279	1.80274	1.44337	1.87161	Tep1	-0.742409	-0.334616	-0.761748	1.28449e-09	4.87336e-06	0.00466759	1	-0.0253609	0.865941	1	-0.433158	0.00068334	1	1.29449	NA
ENSMUSG00000006288	Ttc5	20.4108	20.5887	20.0999	34.408	35.4487	35.1847	18.4764	18.836	18.0753	34.6261	34.7488	35.9751	Ttc5	0.782456	-0.141683	0.785814	1.16945e-116	1.11483e-112	0.000286849	1	0.00452412	0.892136	1	0.928666	4.33228e-161	4.43193e-157	-6.55452	NA
ENSMUSG00000006289	Osgep	27.9424	27.2634	27.808	23.8998	22.2169	24.3894	26.8616	27.4598	27.8283	23.9878	23.8695	23.7479	Osgep	-0.233899	-0.0151254	-0.213218	2.28368e-10	8.97029e-07	0.683466	1	0.0203276	0.574122	1	-0.198446	6.64778e-08	0.000225094	13.12	NA
ENSMUSG00000006299	Aamp	102.858	104.879	99.1745	159.016	158.556	158.76	94.5962	99.48	102.287	159.9	160.278	155.79	Aamp	0.63431	-0.0504732	0.633307	3.12137e-108	2.92223e-104	0.0880672	1	-0.00113003	0.969436	1	0.683653	2.15782e-125	2.08747e-121	-13.5449	NA
ENSMUSG00000006301	Tmbim1	49.0208	48.2693	48.2412	68.9278	66.6722	68.563	61.8922	66.7722	60.5848	71.052	72.0751	72.4457	Tmbim1	0.488954	0.37931	0.566837	3.50983e-50	2.64816e-46	2.74329e-30	3.35559e-26	0.0782202	0.0129577	1	0.187864	3.47178e-09	1.27727e-05	0.495277	NA
ENSMUSG00000006304	Arpc2	182.94	183.293	178.698	183.764	184.452	183.448	201.177	212.782	209.469	197.742	196.936	199.422	Arpc2	0.0176898	0.194208	0.124711	0.474062	1	2.74915e-15	3.17499e-11	0.106974	1.2393e-05	0.145221	-0.0695439	0.00433676	1	-0.35809	NA
ENSMUSG00000006307	Kmt2b	63.9507	63.9488	65.7838	66.8454	62.1356	62.9549	61.0386	58.7442	57.7598	56.7187	60.331	61.3191	Kmt2b	-0.0129401	-0.125598	-0.119516	0.709765	1	0.000328892	1	-0.105837	0.00225617	1	0.00682059	0.849403	1	-0.0543051	NA
ENSMUSG00000006315	Tmem147	37.3069	37.8995	36.1308	50.042	52.9077	51.3476	43.8832	48.4982	47.2333	55.6872	55.7486	52.6801	Tmem147	0.470787	0.326831	0.559564	2.7177e-35	1.82412e-31	1.98115e-17	2.32409e-13	0.0893121	0.0146801	1	0.233268	2.64096e-10	1.02337e-06	0.713728	NA
ENSMUSG00000006333	Rps9	596.127	601.33	589.055	305.457	288.347	300.437	575.534	617.128	611.897	296.89	294.561	289.641	Rps9	-0.998361	0.0145069	-1.01981	1.22467e-262	1.3551e-258	0.609244	1	-0.0215059	0.459546	1	-1.03437	6.28282e-282	7.03047e-278	-71.3023	NA
ENSMUSG00000006335	Tfpt	12.7959	12.4494	12.126	14.3848	14.5528	14.7217	11.4803	11.917	11.8535	14.2578	13.6731	13.6917	Tfpt	0.225198	-0.0844012	0.155508	5.2275e-07	0.00168326	0.0761058	1	-0.0695667	0.109133	1	0.240034	1.24508e-07	0.000413117	-2.84397	NA
ENSMUSG00000006342	Susd2	45.555	47.1707	44.0715	19.9272	19.3987	19.8036	33.6401	34.3788	36.3705	21.7092	21.8515	20.3406	Susd2	-1.21094	-0.390422	-1.09832	1.89536e-208	2.02766e-204	1.2084e-25	1.46229e-21	0.111585	0.00992989	1	-0.708931	8.76153e-70	7.2966e-66	1.81581	NA
ENSMUSG00000006344	Ggt5	3.41479	3.57762	3.75341	0.11234	0.169721	0.1826	3.11185	3.02826	2.70591	0.186204	0.183981	0.183015	Ggt5	-4.8292	-0.283088	-4.2788	1.01505e-147	1.02002e-143	0.00278518	1	0.303517	0.585091	1	-4.24324	1.1725e-117	1.11774e-113	14.9891	NA
ENSMUSG00000006356	Crip2	10.1799	11.0013	9.85012	6.07122	4.99845	5.42991	6.40904	6.91811	6.99386	5.74401	5.37325	5.50509	Crip2	-0.913148	-0.612928	-0.899589	2.45913e-40	1.73443e-36	8.97251e-20	1.0654e-15	0.00871308	0.912068	1	-0.291506	7.76174e-05	0.192103	0.475595	NA
ENSMUSG00000006369	Fbln1	275.435	274.457	265.381	28.1768	27.4753	27.3363	261.581	271.329	268.912	28.2831	27.329	26.2808	Fbln1	-3.29779	-0.0239911	-3.31592	0	0	0.348111	1	-0.0193236	0.606311	1	-3.29313	0	0	137.265	NA
ENSMUSG00000006373	Pgrmc1	79.1638	81.6091	79.7547	193.68	189.418	189.522	81.0058	83.3247	81.0493	177.374	180.928	180.576	Pgrmc1	1.2517	0.0288738	1.16382	0	0	0.273074	1	-0.0876213	0.000121777	1	1.13521	0	0	39.3161	NA
ENSMUSG00000006378	Gcat	3.58142	4.06032	3.22181	2.35493	1.99124	2.60328	3.99891	4.17039	4.20249	2.34158	2.20203	1.93191	Gcat	-0.645168	0.189107	-0.74455	2.55344e-09	9.54477e-06	0.0614745	1	-0.110117	0.382365	1	-0.944406	1.39201e-18	7.10484e-15	-4.99403	NA
ENSMUSG00000006390	Elovl1	47.9377	48.2027	47.8259	58.2755	61.4311	59.6922	52.7705	54.4902	53.5728	65.0939	63.3808	61.6658	Elovl1	0.317189	0.159975	0.400991	3.70307e-26	2.20703e-22	1.64647e-07	0.00164828	0.0842561	0.00352901	1	0.24147	1.58528e-16	7.68543e-13	1.50942	NA
ENSMUSG00000006392	Med8	23.3268	23.3518	23.2396	20.4879	19.6565	19.7435	23.7988	27.0791	25.8608	18.8918	20.9259	19.9486	Med8	-0.223628	0.134578	-0.227592	2.26781e-06	0.00690774	0.00362313	1	-0.00285226	0.957785	1	-0.36106	7.90647e-15	3.64093e-11	-2.6829	NA
ENSMUSG00000006395	Hyi	10.8464	11.4507	11.2123	13.7761	12.422	13.2332	10.928	11.2218	10.6092	12.7182	12.2316	11.3096	Hyi	0.236602	-0.0326361	0.112441	1.54e-05	0.0431816	0.571303	1	-0.122877	0.0219763	1	0.146363	0.00795796	1	-4.4847	NA
ENSMUSG00000006398	Cdc20	99.0925	101.799	98.2775	21.5291	20.6016	20.7809	76.9387	81.5205	79.065	20.6007	20.3038	20.7627	Cdc20	-2.251	-0.332939	-2.27828	0	0	9.65905e-33	1.18516e-28	-0.0290616	0.46973	1	-1.94712	0	0	5.84827	NA
ENSMUSG00000006403	Adamts4	51.3036	48.8352	51.8793	35.0487	33.421	33.9819	34.5104	33.6836	34.1677	26.9437	27.7084	28.6629	Adamts4	-0.569415	-0.57103	-0.867562	7.85999e-67	6.48209e-63	1.9316e-66	2.41701e-62	-0.298719	3.00427e-17	3.75082e-13	-0.297103	6.39012e-17	3.13435e-13	0.520293	NA
ENSMUSG00000006412	Pfdn2	42.5557	40.4461	41.1809	50.7148	51.8939	49.4381	44.5359	47.7698	47.5192	52.1924	48.7082	50.8558	Pfdn2	0.291682	0.171318	0.28903	1.89568e-16	9.23386e-13	1.86281e-06	0.0178886	-0.00226195	0.945443	1	0.118102	0.000722947	1	0.689376	NA
ENSMUSG00000006418	Rnf114	46.8213	46.7879	45.1679	77.8181	75.0581	74.517	49.172	50.501	49.5202	74.8239	76.1567	74.1795	Rnf114	0.712728	0.104543	0.698298	1.59625e-139	1.58651e-135	0.000521852	1	-0.0141746	0.596413	1	0.594011	9.69083e-100	8.88455e-96	5.68201	NA
ENSMUSG00000006423	C330007P06Rik	33.4245	33.1557	31.6953	41.8405	42.202	42.0107	32.7698	32.8394	32.772	40.7997	37.9048	39.4729	C330007P06Rik	0.359368	0.00158372	0.265791	5.83702e-28	3.58218e-24	0.969116	1	-0.0931976	0.00321942	1	0.264587	8.51838e-16	4.03771e-12	167.067	NA
ENSMUSG00000006435	Neurl1a	5.13106	5.29205	5.33158	4.30919	4.55167	4.48269	3.89849	4.05452	3.84936	4.09668	4.23525	3.28882	Neurl1a	-0.241565	-0.419351	-0.447724	0.00299953	1	4.79209e-07	0.00471877	-0.201171	0.0176396	1	-0.0233766	0.818717	1	0.0557448	NA
ENSMUSG00000006442	Srm	139.266	144.044	137.782	45.2525	41.2054	43.7097	172.942	193.217	192.889	49.606	50.8932	47.8556	Srm	-1.69393	0.408924	-1.50528	0	0	1.41926e-25	1.71716e-21	0.188249	1.20773e-05	0.141546	-1.91461	0	0	-4.68206	NA
ENSMUSG00000006445	Epha2	45.0551	47.4204	45.1845	77.0332	78.2027	75.5243	57.4401	58.0821	60.0635	81.9983	87.0663	83.6175	Epha2	0.74531	0.351234	0.876163	2.47083e-124	2.39152e-120	2.6052e-27	3.1661e-23	0.131387	9.47552e-06	0.111224	0.525463	5.71538e-67	4.70948e-63	1.49605	NA
ENSMUSG00000006456	Rbm14	49.604	49.9005	50.2513	35.0807	35.2253	34.899	48.536	50.2031	49.8902	35.1803	32.8825	35.0705	Rbm14	-0.509965	-0.0108752	-0.538775	5.97125e-62	4.80984e-58	0.715934	1	-0.0285974	0.37524	1	-0.527688	1.01158e-66	8.3243e-63	48.5219	NA
ENSMUSG00000006457	Actn3	4.88112	4.97579	5.43125	1.85836	1.51008	1.74627	3.12859	3.44208	3.47942	1.64878	1.64062	1.32884	Actn3	-1.59295	-0.609702	-1.73254	3.89674e-58	3.08427e-54	3.04967e-12	3.40282e-08	-0.154952	0.239887	1	-1.13821	1.98484e-25	1.16133e-21	1.86683	NA
ENSMUSG00000006463	Zdhhc24	8.56359	8.33807	8.83677	29.3141	27.9564	28.7045	9.57233	9.00374	9.86931	29.0991	26.9497	29.3564	Zdhhc24	1.74395	0.144466	1.72975	1.3322e-296	1.49913e-292	0.0145819	1	-0.0100397	0.813972	1	1.58945	7.25564e-254	8.00515e-250	11.0022	NA
ENSMUSG00000006464	Bbs1	4.61451	4.69283	3.98598	11.8058	10.3255	10.4066	4.41734	4.5511	3.91663	10.6706	10.4563	9.98287	Bbs1	1.29754	-0.0448638	1.22992	6.63069e-67	5.47165e-63	0.609261	1	-0.0652829	0.323838	1	1.27713	4.46605e-64	3.63358e-60	-28.4668	NA
ENSMUSG00000006471	Ndor1	6.69736	7.02312	6.76023	8.10557	7.69636	7.9408	7.09526	7.39814	7.54877	7.25277	7.52786	6.9223	Ndor1	0.214976	0.106431	0.0830821	0.000336031	0.796057	0.0845996	1	-0.131124	0.0245478	1	-0.0225788	0.716577	1	-0.212144	NA
ENSMUSG00000006476	Nsmf	89.0948	91.4129	89.1739	160.137	151.562	152.355	81.7924	84.2186	83.2353	151.047	155.119	151.659	Nsmf	0.78329	-0.113701	0.763541	6.48136e-185	6.78793e-181	6.02433e-05	0.528755	-0.0195406	0.453776	1	0.87745	1.08145e-229	1.17738e-225	-7.7172	NA
ENSMUSG00000006494	Pdk1	42.739	42.9262	41.6627	22.9868	21.8904	22.4198	47.967	46.0318	45.35	22.1711	21.3356	21.6372	Pdk1	-0.920296	0.130255	-0.966906	2.06859e-160	2.11389e-156	2.88371e-05	0.258986	-0.0476304	0.214177	1	-1.09818	7.30957e-237	7.9857e-233	-8.43104	NA
ENSMUSG00000006498	Ptbp1	258.189	259.593	255.878	174.025	177.458	174.637	281.465	289.106	286.064	189.536	187.21	184.134	Ptbp1	-0.556514	0.147007	-0.464083	2.65174e-133	2.61197e-129	3.21975e-11	3.53851e-07	0.0924126	5.61124e-05	0.645349	-0.611109	8.45858e-164	8.68358e-160	-4.15699	NA
ENSMUSG00000006517	Mvd	35.9905	35.9853	35.5992	20.9364	20.3439	20.826	29.2048	31.8628	30.5355	22.9409	23.6571	21.7427	Mvd	-0.792945	-0.231957	-0.655382	2.60416e-94	2.3513e-90	3.33191e-10	3.5928e-06	0.137614	0.000742344	1	-0.423376	7.84555e-28	4.78186e-24	1.82523	NA
ENSMUSG00000006519	Cyba	73.2485	71.7053	72.0466	78.1385	80.746	79.2531	71.0138	75.8595	77.5516	81.4748	78.63	75.9585	Cyba	0.133985	0.0485559	0.120945	4.83405e-05	0.128441	0.14437	1	-0.0125481	0.701459	1	0.0728815	0.0264067	1	1.50098	NA
ENSMUSG00000006526	Tmem110	14.1123	15.0793	14.4351	17.957	17.3023	17.0371	14.3926	15.7075	15.0821	17.46	18.0885	18.5917	Tmem110	0.261701	0.0507976	0.311561	1.38444e-08	4.97844e-05	0.291259	1	0.0505668	0.254957	1	0.26147	7.60809e-09	2.74027e-05	5.1473	NA
ENSMUSG00000006527	Sfmbt1	11.2296	11.7336	11.5446	30.948	29.9841	28.2083	11.1791	11.6521	11.3995	28.0368	27.3594	28.5423	Sfmbt1	1.37054	-0.0115897	1.28243	5.39979e-214	5.81072e-210	0.835703	1	-0.0858887	0.0263826	1	1.29625	4.39969e-189	4.63683e-185	-111.845	NA
ENSMUSG00000006567	Atp7b	1.24863	1.08088	1.27817	0.624932	0.564955	0.588553	1.23731	1.14127	0.990731	0.601884	0.82126	0.484549	Atp7b	-1.05799	-0.10098	-0.949484	6.87321e-09	2.51147e-05	0.528306	1	0.10488	0.658066	1	-0.852195	2.34541e-06	0.00695415	8.43923	NA
ENSMUSG00000006575	Rundc3a	2.39836	2.87853	2.65699	3.81261	4.29391	3.79107	2.65995	2.56479	2.95814	3.41927	3.87109	3.15313	Rundc3a	0.587395	0.0446726	0.395346	6.83804e-09	2.4993e-05	0.697643	1	-0.187045	0.0507044	1	0.355688	0.000533281	1	7.9621	NA
ENSMUSG00000006576	Slc4a3	24.1933	22.2366	22.6416	26.8953	24.6571	25.7275	20.987	21.9478	21.8588	22.1865	23.0198	23.0242	Slc4a3	0.162952	-0.092308	-0.0169365	0.000103574	0.264218	0.0326308	1	-0.180514	1.36003e-05	0.159178	0.0747466	0.0809997	1	-0.809752	NA
ENSMUSG00000006585	Cdt1	55.1194	57.3241	56.348	13.0873	12.1986	12.5115	63.0805	65.0176	65.5454	13.5804	13.5365	12.953	Cdt1	-2.16091	0.198256	-2.0748	0	0	6.03208e-12	6.70043e-08	0.0835911	0.0701555	1	-2.27558	0	0	-11.478	NA
ENSMUSG00000006586	Runx1t1	29.792	31.1416	31.1969	8.71428	9.81	9.83524	27.1629	25.1756	24.6165	9.54671	9.22727	9.81703	Runx1t1	-1.70307	-0.25996	-1.68825	3.97136e-267	4.40464e-263	4.14223e-09	4.35017e-05	0.0118292	0.850675	1	-1.43128	1.38537e-182	1.45021e-178	5.50577	NA
ENSMUSG00000006589	Aprt	89.1448	92.0954	86.2834	33.8473	34.9332	34.6434	70.2104	77.6307	76.7277	31.5624	28.7401	27.3362	Aprt	-1.37196	-0.252573	-1.61209	5.24358e-215	5.64682e-211	2.00219e-09	2.11992e-05	-0.239314	2.9214e-07	0.00351386	-1.3587	4.27845e-205	4.57238e-201	5.37944	NA
ENSMUSG00000006599	Gtf2h1	62.1178	63.7491	63.4913	62.12	59.6955	59.5719	74.0265	73.476	71.6494	61.1989	61.1959	60.6858	Gtf2h1	-0.0620901	0.210934	-0.0485568	0.0237963	1	4.78401e-15	5.51549e-11	0.0134035	0.62571	1	-0.259621	2.80367e-22	1.55688e-18	-1.23082	NA
ENSMUSG00000006611	Hfe	2.26506	2.14615	2.00911	4.00484	4.20799	4.45262	2.77711	3.26	2.65546	4.14287	4.25043	3.99742	Hfe	0.991816	0.443323	0.949815	6.56419e-25	3.83414e-21	2.41041e-05	0.217491	-0.033374	0.707502	1	0.51512	1.11636e-08	3.96976e-05	1.16195	NA
ENSMUSG00000006641	Slc5a6	7.89708	8.20491	7.45795	6.00715	6.69968	5.92607	9.33801	9.61618	10.0038	6.28285	5.43395	5.20356	Slc5a6	-0.342608	0.298637	-0.481223	1.96835e-06	0.00601332	9.51423e-06	0.0880161	-0.137823	0.0648612	1	-0.779073	3.42639e-29	2.12984e-25	-2.60876	NA
ENSMUSG00000006673	Qrich1	104.558	109.456	105.603	126.899	120.733	119.548	104.856	105.588	102.001	117.069	117.641	119.998	Qrich1	0.20014	-0.0327194	0.150481	1.30622e-12	5.68335e-09	0.252973	1	-0.0497892	0.0741964	1	0.18307	8.96467e-11	3.54911e-07	-5.59515	NA
ENSMUSG00000006675	P4htm	0.665434	0.465016	0.813026	2.46706	2.5755	2.63335	0.551094	0.49572	0.603974	2.24921	2.49032	2.77621	P4htm	2.03372	-0.248979	1.98326	6.7712e-42	4.84141e-38	0.25401	1	-0.030536	0.807407	1	2.2523	1.01341e-47	7.5438e-44	-9.04612	NA
ENSMUSG00000006676	Usp19	184.756	180.513	184.08	292.306	276.988	277.553	166.448	162.098	161.141	278.754	283.212	281.424	Usp19	0.624481	-0.165891	0.618519	1.69236e-130	1.65733e-126	2.81547e-10	3.04015e-06	-0.00591575	0.815265	1	0.784457	5.42418e-203	5.7876e-199	-4.72874	NA
ENSMUSG00000006678	Pola1	67.5832	68.5927	68.7242	15.4741	15.3089	15.3532	78.5789	70.9434	70.9432	17.5986	17.0567	17.7323	Pola1	-2.15309	0.105649	-1.96779	0	0	0.00341238	1	0.183601	0.000133556	1	-2.07514	0	0	-19.6419	NA
ENSMUSG00000006699	Cdc42	297.463	302.254	304.403	267.013	281.989	280.605	302.185	303.408	305.99	288.514	284.653	287.017	Cdc42	-0.124135	0.011855	-0.0718229	3.57624e-07	0.00116728	0.626797	1	0.0522523	0.03199	1	-0.0837373	0.000571924	1	-7.06347	NA
ENSMUSG00000006705	Pknox1	26.4094	25.4657	27.1103	30.5155	27.9221	28.043	27.8659	26.1356	26.0794	29.7611	30.9251	31.7838	Pknox1	0.131024	0.019854	0.227349	0.00212197	1	0.64981	1	0.0967422	0.0197843	1	0.207912	7.44453e-07	0.00231972	10.472	NA
ENSMUSG00000006715	Gmnn	28.2423	28.3286	27.7914	12.1903	11.7346	10.9178	27.7487	30.34	29.4762	12.2717	11.9888	12.2293	Gmnn	-1.27951	0.0539101	-1.20913	7.33632e-181	7.65839e-177	0.17955	1	0.0683426	0.190769	1	-1.26508	1.10754e-184	1.16214e-180	-23.4665	NA
ENSMUSG00000006717	Acot13	21.7105	21.7539	21.5784	26.655	28.3345	28.7496	20.0162	22.8748	23.0022	29.0683	28.8464	28.3614	Acot13	0.365126	0.0188233	0.407502	8.63214e-16	4.13652e-12	0.694037	1	0.042895	0.326844	1	0.389199	4.65016e-18	2.34275e-14	20.6764	NA
ENSMUSG00000006720	Zfp184	8.36364	8.78748	7.84003	5.31835	5.77174	5.02396	9.30454	8.50716	7.96916	5.28214	5.20635	5.21863	Zfp184	-0.639095	0.0451437	-0.668458	1.07462e-18	5.53644e-15	0.513987	1	-0.0340267	0.658119	1	-0.71827	8.28705e-24	4.72113e-20	-15.9108	NA
ENSMUSG00000006728	Cdk4	461.708	478.424	461.938	164.638	162.525	163.27	456.517	495.186	482.704	179.237	178.046	173.399	Cdk4	-1.51558	0.0329082	-1.40159	0	0	0.245796	1	0.113762	0.000128029	1	-1.43472	0	0	-43.5977	NA
ENSMUSG00000006731	B4galnt1	11.4629	11.3009	10.4814	17.3322	17.1476	16.9319	9.94054	11.0563	10.5251	17.7372	17.4209	17.5966	B4galnt1	0.630122	-0.0767275	0.667217	7.87089e-42	5.62454e-38	0.141236	1	0.0375023	0.381273	1	0.744355	3.61204e-58	2.86037e-54	-9.70129	NA
ENSMUSG00000006732	Mettl1	13.1792	14.2803	14.0032	5.09409	5.39369	4.93375	16.6521	18.5711	19.1178	6.4676	6.10157	5.06787	Mettl1	-1.43399	0.390965	-1.24001	5.43497e-84	4.7643e-80	2.6476e-09	2.79322e-05	0.195863	0.0187961	1	-1.6291	1.11375e-119	1.06608e-115	-4.16688	NA
ENSMUSG00000006736	Tspan31	46.938	47.4703	48.0086	76.5366	77.6013	77.4789	47.3142	49.1934	46.8466	79.2271	78.8728	78.3256	Tspan31	0.701933	0.00957931	0.73131	3.41275e-154	3.46156e-150	0.743564	1	0.0296621	0.23149	1	0.722016	6.42498e-166	6.61259e-162	75.3725	NA
ENSMUSG00000006740	Kif5b	159.878	157.56	162.766	288.782	279.807	281.011	189.88	169.05	167.969	284.265	283.97	296.44	Kif5b	0.823262	0.133889	0.848347	6.59826e-113	6.24262e-109	0.000265208	1	0.0253778	0.479353	1	0.714751	2.88308e-86	2.54547e-82	5.33838	NA
ENSMUSG00000006763	Saal1	23.8934	24.1508	24.0038	12.8631	11.4597	12.707	21.9912	23.3548	22.9854	11.7791	12.7627	12.3047	Saal1	-0.959642	-0.0764416	-0.968193	6.74124e-102	6.22149e-98	0.0662	1	-0.00932352	0.878196	1	-0.892526	6.49839e-88	5.77447e-84	11.6759	NA
ENSMUSG00000006782	Cnp	9.36341	9.8694	8.90322	20.4558	19.0722	20.3599	7.8819	8.39129	7.48151	21.0164	20.4252	20.1747	Cnp	1.09356	-0.244684	1.13196	5.9635e-108	5.58005e-104	3.99933e-05	0.3551	0.0397821	0.359494	1	1.37803	1.33409e-166	1.37451e-162	-5.63188	NA
ENSMUSG00000006784	Ttc25	0.698759	0.61482	0.69674	1.32975	1.18358	1.32528	0.818886	0.595035	0.772129	1.35627	1.33715	1.02731	Ttc25	0.968281	0.125293	0.879293	1.45368e-08	5.22306e-05	0.580195	1	-0.0501741	0.768875	1	0.792854	2.71034e-06	0.00797654	6.32798	NA
ENSMUSG00000006800	Sulf2	0.948701	0.64811	0.646903	0.128359	0.100984	0.197636	1.08668	1.12472	1.27659	0.155412	0.229501	0.198092	Sulf2	-2.65156	0.657893	-1.93832	1.45102e-19	7.64253e-16	0.000273143	1	0.525235	0.219497	1	-2.78497	3.84697e-31	2.44898e-27	-4.23317	NA
ENSMUSG00000006818	Sod2	155.763	154.63	157.152	51.788	53.0452	54.054	144.272	147.267	150.077	50.3296	50.0586	48.2174	Sod2	-1.55737	-0.0823411	-1.65384	0	0	0.000884719	1	-0.0969392	0.00115104	1	-1.57197	0	0	19.091	NA
ENSMUSG00000006850	Tmco6	10.0799	10.5685	9.96641	6.39159	7.12928	6.94847	7.96558	8.07679	8.18776	7.52989	7.23957	7.22384	Tmco6	-0.583663	-0.338568	-0.476961	7.71062e-25	4.49837e-21	1.01e-09	1.07767e-05	0.104632	0.0848151	1	-0.140464	0.0167557	1	0.414876	NA
ENSMUSG00000006906	Stambp	20.4275	20.8384	21.6283	37.8199	38.4903	37.4851	18.2588	19.1836	17.369	38.1517	37.8138	35.3268	Stambp	0.855982	-0.198548	0.822916	1.16126e-102	1.07417e-98	7.89183e-06	0.0734098	-0.0318915	0.389445	1	1.02264	1.07812e-141	1.07532e-137	-5.15059	NA
ENSMUSG00000006920	Ezh1	27.7924	27.6628	27.6087	51.9482	51.7908	50.5959	25.9244	24.0004	23.9943	48.3128	48.2682	49.0617	Ezh1	0.894113	-0.168525	0.810103	6.47786e-180	6.75447e-176	2.41142e-06	0.0230315	-0.0832602	0.00363007	1	0.97938	3.71313e-207	3.97417e-203	-5.81149	NA
ENSMUSG00000006930	Hap1	0.915375	0.981009	1.0456	7.76918	6.87152	6.94847	0.417199	0.644693	0.772129	6.68314	6.96645	6.36446	Hap1	2.91469	-0.710094	2.76729	1.50686e-160	1.54062e-156	0.000114826	0.985089	-0.110133	0.139232	1	3.51481	3.13605e-186	3.29599e-182	-4.94978	NA
ENSMUSG00000006931	P3h4	93.927	95.8904	94.5065	155.732	149.311	147.303	93.91	98.3214	94.6026	164.626	163.1	161.127	P3h4	0.669984	0.0127376	0.781864	6.7493e-135	6.66628e-131	0.652372	1	0.112053	1.78819e-05	0.208717	0.769299	8.59587e-180	8.97495e-176	60.3959	NA
ENSMUSG00000006932	Ctnnb1	390.924	390.905	390.073	331.535	323.643	326.328	426.708	423.612	422.589	362.044	354.724	355.405	Ctnnb1	-0.25576	0.119286	-0.128376	1.1643e-33	7.65178e-30	1.32797e-08	0.000137644	0.12742	1.68702e-09	2.06559e-05	-0.247626	4.14052e-32	2.66815e-28	-2.0759	NA
ENSMUSG00000006941	Eif1b	22.1438	21.0714	20.4654	21.5932	23.0246	23.2166	21.7401	24.348	23.6916	24.1417	23.3081	23.4011	Eif1b	0.0914107	0.132262	0.154521	0.0477241	1	0.0041646	1	0.0626759	0.164289	1	0.0218244	0.631115	1	0.165009	NA
ENSMUSG00000006958	Chrd	0.648771	0.564886	0.630291	5.11011	4.92972	5.02396	0.601305	0.545377	0.603974	4.92804	5.93466	5.5654	Chrd	3.09462	-0.0792959	3.15359	1.11237e-127	1.08345e-123	0.734019	1	0.125863	0.126708	1	3.2999	2.43907e-147	2.44956e-143	-41.6151	NA
ENSMUSG00000006998	Psmd2	418.101	423.895	417.799	352.824	353.801	354.564	414.775	413.416	414.736	358.472	356.817	354.938	Psmd2	-0.247517	-0.0194516	-0.235252	1.10117e-34	7.33932e-31	0.332645	1	0.0122195	0.545612	1	-0.215846	7.28526e-27	4.37116e-23	11.0966	NA
ENSMUSG00000007021	Syngr3	1.84849	1.64681	2.02573	12.8951	12.9547	12.2559	1.35447	1.62129	1.68017	13.3032	12.8082	12.9831	Syngr3	2.80607	-0.250377	2.82894	0	8.47016e-306	0.0456977	1	0.0382174	0.44328	1	3.09471	0	0	-12.3602	NA
ENSMUSG00000007029	Vars	298.246	313.556	302.974	155.075	146.905	144.326	360.045	362.037	365.382	153.572	162.629	155.579	Vars	-1.03561	0.249496	-0.955424	8.51654e-265	9.43292e-261	7.33425e-18	8.62288e-14	0.0801924	0.00797493	1	-1.20492	0	0	-4.82939	NA
ENSMUSG00000007033	Hspa1l	1.6652	1.79661	2.00911	1.82632	1.61319	2.0169	2.02395	1.75371	1.86514	1.37166	1.77718	1.25346	Hspa1l	0.00105606	0.0450209	-0.325367	1	1	0.743155	1	-0.320607	0.0224685	1	-0.364567	0.00854777	1	-8.09773	NA
ENSMUSG00000007035	Msh5	2.98156	3.17814	3.32149	1.65012	1.76784	1.88159	2.96122	3.26	3.51305	1.64878	1.42819	1.76607	Msh5	-0.848517	0.0381778	-0.973315	6.06425e-15	2.83807e-11	0.712821	1	-0.133975	0.300774	1	-1.02069	7.03666e-21	3.79698e-17	-26.7351	NA
ENSMUSG00000007036	Abhd16a	43.822	46.5049	42.1445	76.9531	72.3086	72.9082	39.5148	42.324	41.5161	69.4047	70.2847	68.6916	Abhd16a	0.746484	-0.102872	0.654665	7.87099e-97	7.15788e-93	0.00643678	1	-0.0925747	0.00714836	1	0.756782	5.0254e-98	4.58668e-94	-7.35657	NA
ENSMUSG00000007038	Neu1	22.2271	21.6374	20.997	141.668	133.742	135.199	20.1334	22.1134	21.3207	139.516	136.82	135.285	Neu1	2.66414	-0.0289535	2.66616	0	0	0.493512	1	0.00343985	0.90482	1	2.69654	0	0	-93.1335	NA
ENSMUSG00000007039	Ddah2	82.0298	82.8075	81.4658	50.923	49.9177	51.5732	65.2563	65.4645	68.858	59.3052	55.7942	55.7105	Ddah2	-0.692313	-0.303659	-0.528627	4.74939e-114	4.50337e-110	3.35032e-24	4.03714e-20	0.163898	1.72642e-07	0.0020812	-0.224756	2.41316e-13	1.056e-09	0.740158	NA
ENSMUSG00000007041	Clic1	236.41	242.066	238.502	138.688	135.46	133.425	264.577	288.047	281.456	156.759	157.956	152.97	Clic1	-0.815086	0.218297	-0.616457	1.71675e-165	1.7631e-161	5.35604e-14	6.10749e-10	0.198582	3.79003e-11	4.66856e-07	-0.834801	2.35552e-177	2.45422e-173	-3.82415	NA
ENSMUSG00000007050	Lsm2	61.9511	61.4687	60.8665	21.1927	19.9143	19.1421	59.6327	64.7859	63.3594	22.3096	20.6376	20.9738	Lsm2	-1.61503	0.0271412	-1.52837	0	0	0.449711	1	0.0859157	0.0534956	1	-1.55626	0	0	-57.3395	NA
ENSMUSG00000007080	Pole	91.1777	90.098	90.0211	20.4558	20.0002	20.0592	99.383	91.6341	93.4759	20.4468	20.3493	21.2602	Pole	-2.16611	0.0685068	-2.12848	0	0	0.024048	1	0.0363633	0.38763	1	-2.19825	0	0	-32.0881	NA
ENSMUSG00000007207	Stx1a	8.19701	7.33937	8.18889	6.88817	6.28726	6.28692	8.48443	7.99403	7.81782	5.91336	6.55677	6.274	Stx1a	-0.28691	0.034436	-0.339358	1.88023e-05	0.0521763	0.605695	1	-0.0542766	0.43829	1	-0.375625	1.59921e-08	5.64522e-05	-10.9079	NA
ENSMUSG00000007216	Zfp775	8.79687	8.40465	8.87	6.37557	6.90589	6.30196	7.59737	8.09335	7.48151	6.28285	5.87397	5.68601	Zfp775	-0.416965	-0.170458	-0.54798	1.67753e-11	6.96343e-08	0.00482281	1	-0.132935	0.0427035	1	-0.379441	2.83705e-09	1.04602e-05	2.22601	NA
ENSMUSG00000007338	Mrpl49	62.0844	60.3202	61.9962	50.6027	54.5746	54.6253	62.6621	63.5775	66.7561	53.655	51.8491	52.3032	Mrpl49	-0.206689	0.0657053	-0.224707	7.3193e-10	2.815e-06	0.0475444	1	-0.0181687	0.593506	1	-0.290563	2.64981e-18	1.34372e-14	-4.42222	NA
ENSMUSG00000007379	Dennd2c	4.69783	4.95915	5.06578	12.2704	10.8067	10.4818	4.51776	3.95521	4.48835	9.87002	11.3364	10.4201	Dennd2c	1.1933	-0.185441	1.10146	7.36789e-54	5.69096e-50	0.0393338	1	-0.0853066	0.218618	1	1.29345	3.87531e-60	3.09598e-56	-6.97499	NA
ENSMUSG00000007411	Mark3	64.4839	63.0666	64.6541	97.9213	91.4001	91.1911	70.7628	70.4634	70.6405	95.2539	95.7303	93.8546	Mark3	0.545642	0.14057	0.567541	1.11896e-77	9.62977e-74	3.03683e-06	0.0288468	0.0220628	0.434411	1	0.427136	1.57658e-49	1.18795e-45	3.0386	NA
ENSMUSG00000007415	Gatad1	77.1976	79.0957	77.4789	104.489	103.326	103.234	83.2486	86.7842	83.5716	115.807	114.985	114.826	Gatad1	0.412174	0.117592	0.56415	2.44825e-61	1.96864e-57	4.40424e-06	0.0415364	0.152069	1.8115e-10	2.22579e-06	0.446651	6.30341e-75	5.35411e-71	3.79831	NA
ENSMUSG00000007458	M6pr	148.881	151.851	150.839	209.442	213.957	212.631	164.691	163.472	162.15	220.204	214.006	215.554	M6pr	0.494177	0.118779	0.524908	3.07388e-105	2.85809e-101	2.77762e-07	0.00276095	0.0308478	0.163136	1	0.406246	5.24813e-73	4.41998e-69	3.42019	NA
ENSMUSG00000007476	Lrrc8a	10.6964	12.5159	11.9931	15.9867	15.8932	14.421	12.2	13.655	12.5934	15.9051	15.6911	17.1594	Lrrc8a	0.394878	0.127586	0.471776	1.55063e-10	6.14671e-07	0.045067	1	0.0760133	0.205228	1	0.343306	1.44515e-08	5.11727e-05	2.69077	NA
ENSMUSG00000007480	Mc5r	1.98179	1.64681	1.77654	0.11234	0.066616	0.0773536	1.639	0.992296	1.10844	0.0784345	0.108114	0.0774779	Mc5r	-4.99701	-0.542863	-4.36912	1.08667e-61	8.74876e-58	0.00157541	1	0.0600013	1	1	-4.39543	5.01192e-44	3.61861e-40	8.09676	NA
ENSMUSG00000007564	Ppp2r1a	268.103	272.194	265.464	328.844	323.678	320.9	256.677	272.239	268.138	325.371	330.112	323.111	Ppp2r1a	0.272716	-0.0156575	0.28038	1.51817e-27	9.25779e-24	0.535849	1	0.00767307	0.758688	1	0.296047	3.14627e-32	2.02998e-28	-18.9077	NA
ENSMUSG00000007570	Fance	24.6099	25.0496	25.0172	18.7419	19.1066	17.4732	26.3093	26.7646	26.9707	18.0297	17.5119	17.3554	Fance	-0.435521	0.100253	-0.497616	1.87578e-29	1.17386e-25	0.00610731	1	-0.0628312	0.11717	1	-0.598607	4.27649e-56	3.34977e-52	-5.97096	NA
ENSMUSG00000007589	Tinf2	22.9102	22.8691	22.5585	15.6343	15.0855	14.827	24.0666	25.5232	24.2802	16.0436	15.0538	14.6717	Tinf2	-0.586656	0.112593	-0.579299	1.11015e-43	8.04859e-40	0.00448448	1	0.00707221	0.88369	1	-0.692179	5.00159e-63	4.05279e-59	-6.14763	NA
ENSMUSG00000007591	Tssk4	1.23197	0.864494	1.02899	0.849191	0.736796	0.72387	0.919308	1.17437	1.05799	0.709653	0.654353	0.997157	Tssk4	-0.451837	0.0129801	-0.414299	0.0147445	1	1	1	0.0346025	0.915585	1	-0.430245	0.0197439	1	-33.1464	NA
ENSMUSG00000007594	Hapln4	41.6059	40.8623	42.3106	40.5751	39.1948	36.7183	49.9754	52.388	52.8833	43.5093	43.0638	40.5283	Hapln4	-0.100024	0.315396	0.0260508	0.00986963	1	5.80301e-17	6.7872e-13	0.126532	0.000958726	1	-0.288889	1.0129e-14	4.64717e-11	-0.915957	NA
ENSMUSG00000007603	Dus3l	24.5765	25.2993	24.2032	28.385	28.1111	27.4716	21.4723	22.8086	21.7579	27.0977	27.6173	25.3008	Dus3l	0.180601	-0.165822	0.110451	3.98591e-06	0.0118979	4.84331e-05	0.427906	-0.0693856	0.0702439	1	0.277038	3.44584e-12	1.4476e-08	-1.6707	NA
ENSMUSG00000007610	Gtpbp3	41.4393	38.8482	38.6393	30.7397	29.0734	29.2909	39.6487	41.7282	39.7841	28.1292	28.8008	27.6528	Gtpbp3	-0.416705	0.0269894	-0.491104	5.16189e-30	3.25612e-26	0.451332	1	-0.0753801	0.0473112	1	-0.519075	7.03756e-46	5.16768e-42	-19.2325	NA
ENSMUSG00000007613	Tgfbr1	54.2196	51.6815	55.0356	27.3918	28.4032	28.2534	57.6577	53.017	53.2533	27.5749	27.1469	29.07	Tgfbr1	-0.938046	0.0265459	-0.941717	3.91564e-128	3.81892e-124	0.474429	1	-0.00422418	0.922012	1	-0.968817	1.59474e-138	1.58262e-134	-36.4959	NA
ENSMUSG00000007617	Homer1	14.9954	14.7797	14.9003	54.4151	53.956	52.5956	19.4472	17.1973	17.6044	56.1183	57.357	58.5449	Homer1	1.85101	0.280496	1.94484	0	0	4.9725e-10	5.34345e-06	0.0962661	0.00254813	1	1.66678	0	0	5.94228	NA
ENSMUSG00000007646	Rad51c	11.2963	12.0665	11.0462	3.81261	4.34546	4.39248	11.0787	11.6356	11.3154	4.54315	4.9484	4.58541	Rad51c	-1.46143	-0.0159189	-1.2895	4.07356e-110	3.82833e-106	0.7795	1	0.166612	0.0307059	1	-1.27891	1.69868e-90	1.51913e-86	80.3389	NA
ENSMUSG00000007655	Cav1	102.058	99.4691	101.683	12.0141	14.0201	14.3308	116.672	120.75	118.161	12.7798	14.3407	14.4154	Cav1	-2.91157	0.229951	-2.87	0	0	5.37179e-12	5.97235e-08	0.0413762	0.413502	1	-3.10015	0	0	-13.4818	NA
ENSMUSG00000007656	Arpp19	117.205	114.699	117.365	100.58	99.8032	101.926	122.949	126.097	124.887	103.552	101.375	106.006	Arpp19	-0.208138	0.0984798	-0.167895	9.22775e-17	4.53175e-13	6.73844e-05	0.58894	0.040381	0.107413	1	-0.266237	5.34411e-27	3.21128e-23	-2.70347	NA
ENSMUSG00000007659	Bcl2l1	135.834	138.934	139.592	77.9142	75.986	73.4946	133.376	133.181	134.338	74.3159	72.8945	71.526	Bcl2l1	-0.86634	-0.0476874	-0.921767	2.78878e-239	3.04981e-235	0.0589986	1	-0.0557148	0.0427734	1	-0.874368	2.1211e-243	2.32621e-239	18.3354	NA
ENSMUSG00000007670	Khsrp	214.316	218.147	219.331	198.902	193.096	195.25	211.755	208.297	207.367	192.462	191.99	194.461	Khsrp	-0.150386	-0.0549997	-0.171023	2.27865e-11	9.40629e-08	0.0143889	1	-0.0207049	0.359804	1	-0.116091	2.4701e-07	0.000801548	2.11076	NA
ENSMUSG00000007721	Ccdc124	52.77	54.1449	53.1252	58.5158	54.145	54.1442	51.6491	53.4805	54.1277	59.844	57.448	58.2283	Ccdc124	0.0597991	-0.00708054	0.133083	0.0714568	1	0.83545	1	0.0734173	0.024203	1	0.140297	1.92049e-05	0.0513347	-19.8145	NA
ENSMUSG00000007739	Cct4	234.194	239.37	231.84	177.966	175.637	180.831	262.15	260.735	266.087	182.962	184.084	183.953	Cct4	-0.400279	0.161533	-0.356276	1.12085e-68	9.31878e-65	6.42341e-13	7.2379e-09	0.0438371	0.0568285	1	-0.517975	7.67473e-116	7.28639e-112	-3.20662	NA
ENSMUSG00000007777	0610009B22Rik	13.1292	13.3981	13.5547	18.1011	18.024	17.6987	12.903	13.3571	14.2413	19.6308	19.5603	17.7323	0610009B22Rik	0.425787	0.01492	0.504609	4.66473e-18	2.36922e-14	0.780914	1	0.0809936	0.0808257	1	0.491862	2.60421e-24	1.4956e-20	32.9667	NA
ENSMUSG00000007783	Cpt1c	43.2222	44.0415	42.0282	60.7744	57.3412	57.7978	35.9833	39.6094	38.5397	55.3485	59.8909	53.3736	Cpt1c	0.444586	-0.179988	0.381673	1.37316e-26	8.2486e-23	2.92807e-05	0.262853	-0.0612677	0.133516	1	0.563307	5.39811e-41	3.79757e-37	-3.1297	NA
ENSMUSG00000007805	Twist2	7.06394	7.03976	7.62407	2.48308	2.36929	2.76867	7.83168	8.772	7.88508	3.09597	2.93035	2.88174	Twist2	-1.5184	0.173531	-1.28605	5.60421e-75	4.77759e-71	0.00998713	1	0.222956	0.0229826	1	-1.469	1.83963e-79	1.59018e-75	-8.46532	NA
ENSMUSG00000007812	Zfp655	34.041	35.9853	35.1175	67.342	66.0364	65.9318	36.385	35.372	35.3111	63.4158	61.6511	63.2941	Zfp655	0.923217	0.0261624	0.84139	1.40143e-222	1.51648e-218	0.419198	1	-0.0815625	0.00229139	1	0.815493	9.09971e-174	9.44186e-170	31.1704	NA
ENSMUSG00000007815	Rhoa	264.871	264.97	269.849	254.022	265.269	263.886	288.059	300.445	300.407	289.407	285.108	282.886	Rhoa	-0.0301391	0.152619	0.100522	0.234697	1	1.51826e-09	1.61285e-05	0.130666	2.16972e-07	0.00261212	-0.052092	0.0382809	1	-0.341321	NA
ENSMUSG00000007817	Zmiz1	121.604	116.913	121.302	39.6941	39.3839	38.8683	141.008	130.168	130.537	42.2007	44.7935	42.1415	Zmiz1	-1.61005	0.158918	-1.47874	0	0	8.99375e-07	0.00875362	0.131041	0.000455472	1	-1.63793	0	0	-10.3067	NA
ENSMUSG00000007827	Ankrd26	52.57	50.999	54.2548	52.8773	49.8833	50.9417	54.1429	47.2236	49.8565	52.1771	50.9539	53.4942	Ankrd26	-0.0380146	-0.0617662	-0.0108235	0.351957	1	0.132541	1	0.0270208	0.5063	1	0.0507725	0.214226	1	-0.82201	NA
ENSMUSG00000007833	Aldh16a1	19.1445	18.7079	19.07	13.2155	12.8516	13.0829	16.7358	18.2897	18.5461	13.334	13.7337	12.2142	Aldh16a1	-0.540657	-0.0876451	-0.536825	4.71153e-28	2.8943e-24	0.0658924	1	0.00428971	0.938109	1	-0.448723	9.71088e-20	5.09336e-16	5.11977	NA
ENSMUSG00000007836	Hnrnpa0	426.233	424.145	405.688	233.598	206.207	198.543	372.798	395.589	391.934	212.691	220.227	212.704	Hnrnpa0	-0.976648	-0.114393	-0.95999	4.49563e-114	4.26411e-110	0.00706732	1	0.0164042	0.703721	1	-0.845851	2.18831e-86	1.93446e-82	7.39428	NA
ENSMUSG00000007837	Prrg2	15.1287	15.6452	14.6843	19.6549	19.8971	19.8938	13.3884	14.1516	14.1573	20.0773	21.1838	21.1396	Prrg2	0.387723	-0.124785	0.457064	2.71539e-20	1.45246e-16	0.00606631	1	0.070306	0.0737238	1	0.582816	4.97283e-44	3.59138e-40	-4.67056	NA
ENSMUSG00000007850	Hnrnph1	394.557	392.919	404.758	290.127	297.953	297.084	384.531	385.177	379.137	284.481	283.424	297.737	Hnrnph1	-0.429707	-0.0534834	-0.462065	5.90736e-67	4.87593e-63	0.0303305	1	-0.0321393	0.198495	1	-0.408363	1.17875e-60	9.44536e-57	7.63531	NA
ENSMUSG00000007867	Ift43	13.0126	14.0972	12.8403	13.1033	12.6626	12.9927	12.7691	14.5488	14.0395	12.1794	12.0192	11.6262	Ift43	-0.0432599	0.050227	-0.15628	0.421069	1	0.351147	1	-0.114484	0.0338001	1	-0.207971	0.000100541	0.244616	-4.14062	NA
ENSMUSG00000007872	Id3	152.73	155.845	148.928	5.11011	4.99845	5.77572	98.9144	105.588	102.506	2.86503	2.79379	2.55006	Id3	-4.85208	-0.575604	-5.80199	0	0	8.7158e-80	1.09322e-75	-0.964622	6.93218e-33	8.71514e-29	-5.2411	0	0	9.10539	NA
ENSMUSG00000007880	Arid1a	127.519	121.607	125.621	145.288	136.68	135.786	117.124	108.865	110.291	132.65	139.111	141.708	Arid1a	0.156758	-0.156311	0.141586	4.07297e-06	0.0121456	5.41039e-06	0.0507711	-0.014818	0.661366	1	0.298251	2.35529e-18	1.19531e-14	-1.90806	NA
ENSMUSG00000007888	Crlf1	202.902	207.511	196.872	35.9297	33.6615	35.4102	181.277	200.682	198.657	46.9887	48.4048	46.0162	Crlf1	-2.53239	-0.0647816	-2.10247	0	0	0.0650274	1	0.429176	4.24863e-26	5.33331e-22	-2.03843	0	0	31.4662	NA
ENSMUSG00000007891	Ctsd	146.665	145.775	142.699	294.837	295.736	300.557	149.226	164.101	158.737	306.974	302.3	294.526	Ctsd	1.03436	0.117567	1.05442	3.18328e-263	3.52293e-259	0.000109195	0.9393	0.020306	0.483806	1	0.937102	1.34887e-218	1.458e-214	7.97081	NA
ENSMUSG00000007892	Rplp1	1148.85	1157.34	1129.57	589.385	605.617	595.955	1140.24	1265.13	1237.74	615.439	609.544	601.713	Rplp1	-0.939952	0.0845468	-0.911377	9.16238e-196	9.68922e-192	0.00659459	1	0.0285247	0.363691	1	-0.995974	1.57157e-219	1.70013e-215	-11.7802	NA
ENSMUSG00000007950	Abhd8	116.405	118.078	114.209	100.837	97.8442	96.2429	101.207	101.913	102.371	104.876	103.757	95.9653	Abhd8	-0.241784	-0.19087	-0.19603	5.70547e-15	2.67244e-11	7.03417e-10	7.52867e-06	0.046602	0.133736	1	-0.00431241	0.892481	1	0.0225934	NA
ENSMUSG00000007987	Ift22	26.826	26.3146	26.6784	36.4743	35.947	35.5305	26.7612	27.3936	25.5582	38.0901	37.8897	38.9754	Ift22	0.435788	-0.00173904	0.526205	5.40201e-40	3.79923e-36	0.965175	1	0.0910392	0.00305664	1	0.528567	4.43884e-60	3.54486e-56	-303.941	NA
ENSMUSG00000007989	Fzd3	0.482143	0.6814	0.580454	1.58604	1.69911	1.49067	0.551094	0.545377	0.419004	1.69497	1.83787	1.46453	Fzd3	1.49911	-0.213862	1.52679	3.31081e-19	1.72559e-15	0.354634	1	0.0697566	0.611544	1	1.78286	1.57364e-25	9.23256e-22	-8.33649	NA
ENSMUSG00000008035	Mid1ip1	12.8459	13.265	11.827	3.5403	3.41752	3.52043	15.1792	15.2109	14.8635	3.60402	3.06691	3.51497	Mid1ip1	-1.86445	0.255044	-1.89897	1.71904e-167	1.76872e-163	9.90272e-07	0.00962049	-0.0422961	0.644382	1	-2.1618	6.02881e-241	6.60335e-237	-8.47619	NA
ENSMUSG00000008036	Ap2s1	66.5501	68.7092	63.5079	63.3534	65.1772	60.9852	59.4988	63.3127	64.856	65.3249	67.9631	60.716	Ap2s1	-0.069219	-0.0829361	-0.0358063	0.0977112	1	0.0470171	1	0.0341684	0.414143	1	0.0478855	0.250235	1	-0.577379	NA
ENSMUSG00000008090	Fgfrl1	74.8648	78.4465	73.4088	90.9212	86.5199	87.4774	71.0306	72.4332	72.1539	96.2084	94.8806	95.0607	Fgfrl1	0.224857	-0.0724474	0.336391	4.40942e-15	2.07066e-11	0.013444	1	0.111108	6.90913e-05	0.791993	0.408412	1.34344e-46	9.9159e-43	-5.63737	NA
ENSMUSG00000008129	4930432K21Rik	2.68163	2.22938	2.55732	1.08947	1.09766	1.2501	2.65995	2.64755	2.45368	1.21771	1.33715	1.26854	4930432K21Rik	-1.13642	0.0563809	-0.962629	3.79255e-20	2.02333e-16	0.599121	1	0.153796	0.277881	1	-1.03904	1.24216e-18	6.34994e-15	-18.429	NA
ENSMUSG00000008136	Fhl2	68.7662	72.2047	69.9535	4.98196	4.91253	5.71558	75.3822	79.7494	78.1066	6.51378	6.05605	6.33431	Fhl2	-3.7597	0.145173	-3.4803	0	0	4.49635e-06	0.0423915	0.27326	4.23526e-05	0.489173	-3.63163	0	0	-25.0159	NA
ENSMUSG00000008140	Emc10	151.664	160.34	153.497	106.331	105.629	105.249	152.138	168.405	164.74	107.909	109.159	104.891	Emc10	-0.553499	0.0600796	-0.531695	8.60813e-62	6.93127e-58	0.0676697	1	0.0214484	0.526052	1	-0.592131	5.01789e-71	4.19395e-67	-9.85576	NA
ENSMUSG00000008167	Fbxw9	5.8309	6.22416	6.5775	9.45113	8.55556	9.12859	5.67261	5.61046	5.1946	8.5614	9.28797	8.68628	Fbxw9	0.545911	-0.178114	0.510937	3.59555e-17	1.78591e-13	0.013618	1	-0.0336603	0.591296	1	0.690372	9.7091e-26	5.72546e-22	-3.87601	NA
ENSMUSG00000008193	Spib	4.69783	4.42651	4.33484	0.592895	0.479035	0.363024	1.72268	1.6544	1.41112	0.263181	0.275021	0.243322	Spib	-3.3217	-1.50838	-4.10715	7.5148e-132	7.38329e-128	1.31029e-47	1.62974e-43	-0.953053	0.000467122	1	-2.76635	9.6734e-45	7.02772e-41	1.83399	NA
ENSMUSG00000008200	Fnbp4	68.8995	70.69	69.7707	62.12	61.8778	62.1429	75.1981	73.476	73.9868	59.0127	58.1764	60.1581	Fnbp4	-0.169601	0.088871	-0.239468	4.46449e-11	1.81794e-07	0.000445644	1	-0.0698911	0.00729989	1	-0.328363	6.44808e-38	4.42145e-34	-3.69483	NA
ENSMUSG00000008206	Cers4	8.98016	9.17032	8.82016	10.8608	11.2707	11.3388	6.27514	6.73604	7.31335	11.1325	11.3364	11.5659	Cers4	0.312574	-0.409921	0.335626	5.73419e-09	2.10502e-05	7.12943e-12	7.91224e-08	0.0242128	0.640051	1	0.746714	6.42943e-41	4.51603e-37	-1.8216	NA
ENSMUSG00000008226	Scrn3	24.1266	25.0496	24.8178	26.3506	28.0939	27.9978	27.5311	26.9302	28.9213	30.3461	32.1997	30.7887	Scrn3	0.156053	0.172384	0.334724	7.97934e-05	0.206106	1.40404e-05	0.128554	0.179376	2.20235e-06	0.0261727	0.163044	1.83594e-05	0.04924	0.945816	NA
ENSMUSG00000008301	Phax	56.4524	58.7889	57.7268	62.7607	58.1145	60.6996	56.9882	57.2545	59.0714	64.0778	62.2883	63.3996	Phax	0.0706523	0.00283917	0.133814	0.0232712	1	0.930515	1	0.0630929	0.037505	1	0.130906	2.01933e-05	0.0537749	46.1072	NA
ENSMUSG00000008305	Tle1	10.5631	10.8681	10.3319	14.529	14.0545	14.1353	11.7314	12.1984	12.3244	15.628	16.298	16.1945	Tle1	0.428762	0.191328	0.599363	5.30279e-20	2.82002e-16	9.68761e-05	0.837107	0.172125	4.76669e-05	0.549361	0.409558	1.3838e-20	7.41164e-17	2.1406	NA
ENSMUSG00000008307	1700109H08Rik	1.51524	1.28062	1.64364	2.11465	1.9225	2.12215	1.33773	1.20748	1.12525	1.57181	1.67097	2.17314	1700109H08Rik	0.482799	-0.280717	0.279869	0.000481532	1	0.0657407	1	-0.189601	0.152974	1	0.573954	7.9781e-05	0.19658	-2.0446	NA
ENSMUSG00000008318	Relt	8.74688	9.18696	9.01951	9.2589	9.50069	9.24887	8.9698	9.66584	9.7516	11.425	11.3212	10.8121	Relt	0.0548354	0.0750474	0.31608	0.317795	1	0.174998	1	0.26211	3.05193e-07	0.00367056	0.241897	2.57101e-06	0.00758962	3.22325	NA
ENSMUSG00000008333	Snrpb2	122.004	125.552	123.429	62.7767	65.8989	66.2626	114.664	121.793	120.667	66.0639	63.836	64.4249	Snrpb2	-0.928619	-0.0549274	-0.93294	1.8378e-216	1.98041e-212	0.0539461	1	-0.00464406	0.884688	1	-0.878336	2.00769e-194	2.12393e-190	15.9908	NA
ENSMUSG00000008348	Ubc	68.2997	73.7194	65.6343	66.1086	66.3801	71.104	68.2689	74.2374	72.9106	73.0073	73.8656	70.6063	Ubc	-0.0280693	0.0530137	0.0681224	0.491875	1	0.196615	1	0.0947833	0.0197963	1	0.0137002	0.737886	1	0.258427	NA
ENSMUSG00000008373	Prpf31	45.5883	46.0555	44.8855	29.7946	30.3794	29.5465	45.6071	45.916	47.5024	30.7618	29.8933	29.1755	Prpf31	-0.606793	0.0261028	-0.604188	1.56527e-83	1.36977e-79	0.380571	1	0.00219549	0.958264	1	-0.630701	3.00176e-92	2.69768e-88	-24.1623	NA
ENSMUSG00000008384	Sertad1	25.443	25.6155	23.6716	51.9802	51.3096	49.378	18.4931	20.5574	20.2781	51.3149	51.0601	47.3279	Sertad1	1.03123	-0.333309	1.00227	1.15717e-132	1.13877e-128	9.10306e-13	1.02337e-08	-0.028081	0.47801	1	1.33646	3.84024e-213	4.1321e-209	-4.00967	NA
ENSMUSG00000008393	Carhsp1	93.5938	94.0095	92.5794	104.665	104.941	104.392	87.801	88.0588	88.5826	108.463	107.626	107.62	Carhsp1	0.164371	-0.083446	0.20835	3.2759e-13	1.45679e-09	0.000311711	1	0.0440077	0.0459177	1	0.291825	2.16382e-38	1.48958e-34	-3.49717	NA
ENSMUSG00000008398	Elk3	65.8836	67.9769	67.0463	36.5224	36.7547	37.3799	72.3026	72.0856	73.7177	44.8796	44.5204	43.9356	Elk3	-0.860619	0.11851	-0.591402	1.91555e-213	2.06017e-209	3.20658e-06	0.0304208	0.268758	3.12419e-20	3.91055e-16	-0.710373	3.22322e-159	3.28865e-155	-5.99419	NA
ENSMUSG00000008429	Herpud2	44.3552	45.9889	44.5034	92.8434	91.108	91.146	43.3476	44.4097	42.6595	93.0985	90.4348	89.8442	Herpud2	1.02912	-0.048143	1.01958	2.98516e-305	3.37085e-301	0.116158	1	-0.00913559	0.723224	1	1.06813	0	0	-22.1866	NA
ENSMUSG00000008435	Rdh13	15.3953	15.1625	15.2657	11.8058	11.7174	11.6244	15.1625	15.7572	15.6034	10.4397	9.84938	10.2543	Rdh13	-0.383741	0.0219644	-0.585632	4.47839e-18	2.27637e-14	0.610918	1	-0.203059	1.99966e-05	0.2331	-0.608766	4.54139e-42	3.23074e-38	-27.716	NA
ENSMUSG00000008450	Nutf2	50.8871	51.8646	50.7829	21.8655	22.8699	22.8558	54.4275	60.8133	57.0536	24.1879	23.9606	23.5067	Nutf2	-1.18477	0.16651	-1.09946	1.96339e-202	2.08905e-198	3.80794e-06	0.0360041	0.0843116	0.0480215	1	-1.26698	1.36661e-242	1.49863e-238	-7.60898	NA
ENSMUSG00000008475	Arpc5	99.4924	99.5523	100.869	158.647	162.078	158.865	109.358	111.894	110.762	164.811	160.854	163.599	Arpc5	0.677232	0.14676	0.706022	2.8798e-185	3.01688e-181	1.28746e-09	1.37037e-05	0.0289833	0.196336	1	0.559456	2.33615e-130	2.28639e-126	3.81206	NA
ENSMUSG00000008489	Elavl2	2.01512	2.52899	2.17524	1.58604	1.90532	1.7613	2.57627	2.34961	2.06692	1.31008	1.61027	1.20823	Elavl2	-0.362804	0.0585015	-0.706914	0.00581946	1	0.647364	1	-0.352368	0.01337	1	-0.773676	9.22506e-09	3.2998e-05	-13.2249	NA
ENSMUSG00000008496	Pou2f2	3.73139	3.94381	4.10226	1.24965	1.11485	1.44556	2.07416	2.54824	2.18463	0.955982	0.927473	0.89162	Pou2f2	-1.64418	-0.798541	-2.08493	1.43792e-48	1.07355e-44	2.08538e-15	2.41091e-11	-0.478419	0.00187891	1	-1.32406	6.42861e-23	3.61288e-19	1.65809	NA
ENSMUSG00000008540	Mgst1	32.9412	33.655	34.5526	14.8814	16.2197	15.0525	25.4725	28.453	27.8114	15.6741	15.1752	14.2345	Mgst1	-1.13487	-0.307663	-1.16667	4.62858e-129	4.52398e-125	5.34482e-12	5.94291e-08	-0.0327936	0.523919	1	-0.860007	6.91769e-72	5.79633e-68	2.79529	NA
ENSMUSG00000008575	Nfib	126.569	130.162	128.844	53.9826	56.2071	55.8732	139.92	129.242	132.959	50.5759	52.5167	54.7004	Nfib	-1.21582	0.0605939	-1.28962	2.9135e-298	3.28177e-294	0.0536605	1	-0.0735266	0.0346659	1	-1.34994	0	0	-22.2785	NA
ENSMUSG00000008604	Ubqln4	127.503	123.687	121.518	88.0219	87.9977	85.4927	149.862	153.359	150.968	92.1748	89.1906	91.2614	Ubqln4	-0.511624	0.285336	-0.450971	3.29658e-84	2.89143e-80	2.25251e-29	2.75008e-25	0.0603571	0.0248262	1	-0.736603	3.67878e-180	3.84212e-176	-2.58153	NA
ENSMUSG00000008668	Rps18	610.523	621.238	605.966	297.48	292.162	306.105	609.342	682.014	673.728	308.852	299.796	295.807	Rps18	-1.03674	0.0966782	-1.02296	8.20883e-194	8.66114e-190	0.00490398	1	0.0138543	0.6906	1	-1.11957	1.28245e-225	1.39312e-221	-11.5803	NA
ENSMUSG00000008682	Rpl10	513.979	523.482	496.176	338.679	344.075	345.438	514.611	564.872	567.723	333.808	332.601	334.418	Rpl10	-0.576881	0.103074	-0.615412	5.26745e-72	4.44362e-68	0.00123394	1	-0.0389259	0.22722	1	-0.718882	1.01729e-110	9.55747e-107	-6.97439	NA
ENSMUSG00000008683	Rps15a	229.962	229.949	230.329	155.7	160.549	157.692	225.747	250.621	241.99	159.577	152.843	151.749	Rps15a	-0.542559	0.0576372	-0.572806	2.93263e-64	2.38951e-60	0.0690085	1	-0.0300189	0.353129	1	-0.630215	2.56408e-86	2.26511e-82	-10.9342	NA
ENSMUSG00000008690	Ncaph2	217.715	214.685	210.693	117.432	112.571	109.91	198.684	209.621	206.325	122.319	117.367	118.686	Ncaph2	-0.920191	-0.0653027	-0.843658	6.19519e-222	6.69885e-218	0.0206618	1	0.0764272	0.00976598	1	-0.778461	1.06572e-160	1.0898e-156	11.9208	NA
ENSMUSG00000008730	Hipk1	115.755	119.859	118.81	167.041	164.553	162.759	133.711	125.054	123.189	153.757	160.095	160.463	Hipk1	0.480114	0.107936	0.420251	8.39035e-58	6.62837e-54	0.000379034	1	-0.0596181	0.0428958	1	0.31256	1.12685e-25	6.63038e-22	2.8958	NA
ENSMUSG00000008734	Gprc5b	51.4869	51.1821	52.1118	25.6298	24.0213	24.3743	50.1595	47.4222	47.7378	26.2355	25.2503	27.2759	Gprc5b	-1.06475	-0.0910933	-0.975338	2.53557e-204	2.70266e-200	0.00526907	1	0.0893405	0.0193045	1	-0.884319	5.02541e-143	5.01937e-139	9.70784	NA
ENSMUSG00000008763	Man1a2	177.191	178.433	178.033	246.781	242.809	246.535	188.24	172.394	175.334	249.795	251.333	259.623	Man1a2	0.464163	0.00621209	0.511309	9.27334e-58	7.32223e-54	0.832946	1	0.0474381	0.0967119	1	0.50539	1.96596e-68	1.62958e-64	81.3558	NA
ENSMUSG00000008822	Acyp1	6.29745	6.091	6.7104	11.6617	12.1814	12.0154	7.32957	8.20921	7.61603	12.826	12.4744	13.2696	Acyp1	0.911647	0.279281	1.0147	3.56008e-57	2.80214e-53	1.1824e-05	0.108792	0.105844	0.034875	1	0.738213	2.47332e-42	1.76348e-38	2.64326	NA
ENSMUSG00000008855	Hdac5	207.251	208.776	204.447	133.787	128.569	129.29	171.704	179.892	179.437	138.531	139.46	136.039	Hdac5	-0.663881	-0.224592	-0.58366	2.66196e-147	2.67368e-143	7.35778e-19	8.70426e-15	0.080127	0.0021534	1	-0.359163	2.67196e-44	1.93396e-40	1.59918	NA
ENSMUSG00000008859	Rala	60.4848	61.4853	60.1522	61.1589	65.0569	64.6238	64.1684	65.9777	63.9647	66.7721	66.2637	67.0934	Rala	0.0673629	0.0920767	0.136067	0.0190763	1	0.00140107	1	0.0687331	0.014867	1	0.0440192	0.119533	1	0.478071	NA
ENSMUSG00000008892	Vdac3	118.321	118.81	115.671	62.8888	63.476	66.8189	147.067	154.782	153.877	69.143	70.3757	68.3448	Vdac3	-0.868593	0.369409	-0.763229	3.3049e-193	3.48601e-189	2.34177e-40	2.89654e-36	0.105106	0.000527053	1	-1.1329	0	0	-3.06678	NA
ENSMUSG00000008958	Vps72	55.9192	55.2268	55.7998	40.9435	39.2464	40.1163	55.5321	57.0062	57.8103	36.335	36.2813	36.0505	Vps72	-0.472518	0.029114	-0.619456	2.95172e-62	2.38233e-58	0.286876	1	-0.147396	9.30425e-07	0.0111204	-0.649027	3.7162e-115	3.52147e-111	-22.2927	NA
ENSMUSG00000008976	Gabpa	82.3464	80.9932	82.7616	93.9808	93.72	94.0628	86.9642	82.5468	81.806	91.1125	90.5107	93.3118	Gabpa	0.195338	0.0302556	0.159776	5.55318e-13	2.44951e-09	0.271767	1	-0.0354144	0.184297	1	0.129668	1.55693e-06	0.00470971	4.28575	NA
ENSMUSG00000009013	Dynll1	168.476	167.33	160.773	148.348	149.276	150.024	175.453	191.777	187.205	178.729	176.771	169.555	Dynll1	-0.149663	0.159048	0.0803773	2.02957e-06	0.00619627	3.80257e-07	0.00375694	0.230093	2.14676e-13	2.66305e-09	-0.0786179	0.0116933	1	-0.494303	NA
ENSMUSG00000009030	Pdcl	34.8241	34.8701	35.3999	35.2409	36.1704	35.8763	32.2509	32.0284	31.6958	36.1041	36.2661	36.4576	Pdcl	0.029608	-0.131056	0.0503934	0.31153	1	1.28174e-05	0.117741	0.0208256	0.47166	1	0.18149	6.20314e-10	2.36216e-06	-1.38483	NA
ENSMUSG00000009035	Tmem184b	149.347	145.209	147.367	218.701	212.565	210.932	138.732	141.524	136.305	243.436	245.005	245.134	Tmem184b	0.539279	-0.0852496	0.731237	4.02733e-111	3.79374e-107	0.000572648	1	0.191996	2.07368e-16	2.58505e-12	0.816524	2.39453e-254	2.64284e-250	-9.57805	NA
ENSMUSG00000009073	Nf2	126.02	125.885	124.641	161.371	158.607	156.564	134.665	132.254	134.892	146.567	144.467	149.684	Nf2	0.339758	0.0936936	0.226896	1.82786e-46	1.35115e-42	0.000101998	0.880042	-0.112653	1.37347e-06	0.0163732	0.133411	1.78198e-08	6.28504e-05	1.42391	NA
ENSMUSG00000009076	Zmat5	4.78114	4.90921	4.56741	4.4053	4.37983	4.18198	4.21649	4.8987	5.34594	4.75869	4.59941	4.76633	Zmat5	-0.138879	0.020475	-0.0131097	0.0969896	1	0.802741	1	0.125243	0.130077	1	-0.0341143	0.68479	1	-1.66615	NA
ENSMUSG00000009079	Ewsr1	293.597	292.667	294.353	209.65	220.178	205.7	272.979	279.605	278.48	198.881	200.092	199.422	Ewsr1	-0.470976	-0.0835585	-0.557415	1.44372e-77	1.24159e-73	0.000844235	1	-0.0865062	0.000682319	1	-0.473923	3.00865e-78	2.58984e-74	5.67175	NA
ENSMUSG00000009090	Ap1b1	95.2767	100.318	93.842	190.38	187.133	182.109	90.8304	88.2243	89.4738	180.207	182.309	184.692	Ap1b1	0.951292	-0.108225	0.919359	1.07039e-259	1.18278e-255	0.000187669	1	-0.0322126	0.225081	1	1.0273	4.40147e-300	4.96045e-296	-9.49231	NA
ENSMUSG00000009108	Gnat2	3.29815	3.24472	3.32149	2.33891	2.26618	1.88159	3.84828	2.99516	3.61395	2.66489	2.68758	2.55006	Gnat2	-0.616181	0.0843934	-0.320223	1.46112e-08	5.2469e-05	0.413227	1	0.292817	0.00941798	1	-0.407776	6.65902e-05	0.166276	-4.83185	NA
ENSMUSG00000009112	Bcl2l13	75.598	71.6554	74.5385	135.837	136.629	134.057	77.3739	72.8966	74.9957	132.08	129.643	133.838	Bcl2l13	0.874256	0.0223792	0.834939	1.74154e-219	1.88069e-215	0.443242	1	-0.0392948	0.13664	1	0.812582	1.28689e-190	1.35806e-186	36.3097	NA
ENSMUSG00000009207	Lnpk	42.1724	42.7099	42.7093	47.9916	46.3262	45.3486	46.0924	44.509	44.442	48.0356	49.9069	50.4035	Lnpk	0.130222	0.0819257	0.21715	3.2572e-05	0.0881074	0.0097579	1	0.087474	0.00417931	1	0.13577	1.00505e-05	0.0278601	1.65724	NA
ENSMUSG00000009291	Pttg1ip	119.788	115.415	118.893	136.75	135.168	134.297	117.576	122.124	119.086	133.928	136.137	131.079	Pttg1ip	0.198104	0.019024	0.17999	7.02051e-15	3.28349e-11	0.461815	1	-0.0181012	0.471437	1	0.160979	2.20813e-10	8.59182e-07	8.46188	NA
ENSMUSG00000009293	Ube2g2	32.6913	33.4719	33.5559	41.344	42.9066	42.131	34.0418	34.925	34.1004	44.3407	45.8253	44.3578	Ube2g2	0.341729	0.0477458	0.431846	5.84008e-29	3.63662e-25	0.136297	1	0.0905443	0.00175508	1	0.384528	8.86477e-38	6.06882e-34	8.05365	NA
ENSMUSG00000009376	Met	120.321	121.074	127.266	108.077	105.766	106.572	132.137	115.768	121.171	104.199	103.15	106.097	Met	-0.20237	0.00157823	-0.23372	3.72005e-08	0.000130164	0.966547	1	-0.0317686	0.389979	1	-0.235717	1.38216e-10	5.43329e-07	-149.355	NA
ENSMUSG00000009406	Elk1	22.8603	21.0881	22.7579	35.5132	36.1361	35.4704	24.7528	21.7327	23.8262	37.1202	36.4785	36.4877	Elk1	0.683811	0.0758105	0.723675	7.72343e-63	6.25366e-59	0.0815459	1	0.0396621	0.304539	1	0.647663	4.56514e-58	3.61148e-54	8.54318	NA
ENSMUSG00000009418	Nav1	25.6929	26.1648	25.4159	17.4764	17.182	16.8868	29.4559	26.0529	26.5839	16.4747	17.8154	18.6671	Nav1	-0.585233	0.0873089	-0.546952	4.39249e-32	2.83667e-28	0.0670575	1	0.0396078	0.448633	1	-0.632936	2.11144e-38	1.45372e-34	-7.24938	NA
ENSMUSG00000009470	Tnpo1	190.205	190.067	192.12	181.538	178.816	176.321	221.479	202.818	208.544	182.3	182.931	192.803	Tnpo1	-0.0930283	0.144839	-0.037109	0.00246982	1	2.20114e-06	0.0210716	0.0564022	0.0661174	1	-0.181465	2.79178e-09	1.02989e-05	-1.25288	NA
ENSMUSG00000009535	Rnmt	56.8023	59.6045	58.8564	58.5639	58.5098	59.4967	66.0429	64.0079	61.5601	57.8426	56.9322	58.4545	Rnmt	0.0109365	0.128749	-0.0166271	0.724065	1	2.00558e-05	0.182087	-0.0277849	0.359214	1	-0.145597	1.16133e-06	0.00355251	-1.13086	NA
ENSMUSG00000009549	Srp14	73.9483	72.5542	74.4886	138.208	136.113	134.357	70.9469	74.1215	73.3141	147.676	142.752	138.512	Srp14	0.887161	-0.0171127	0.956381	7.18076e-215	7.73152e-211	0.56853	1	0.0698428	0.00981523	1	0.974117	6.15916e-261	6.81881e-257	-56.9236	NA
ENSMUSG00000009555	Cdk9	92.544	94.0928	91.0345	115.942	116.351	117.277	90.8304	99.7449	98.1843	119.086	119.856	114.691	Cdk9	0.332357	0.0565483	0.348734	1.80276e-26	1.08039e-22	0.0741913	1	0.0165918	0.58887	1	0.292401	4.56587e-21	2.47653e-17	5.17081	NA
ENSMUSG00000009563	Tor2a	22.6603	23.1521	21.8774	53.0215	51.808	50.235	26.0081	27.2447	26.9034	53.6704	54.6865	52.9515	Tor2a	1.19652	0.244253	1.25308	1.54111e-279	1.72204e-275	9.37503e-11	1.02207e-06	0.057415	0.055624	1	1.00969	2.0404e-212	2.19404e-208	4.13377	NA
ENSMUSG00000009566	Fpgs	26.976	27.0969	26.5289	20.3757	20.2236	20.1795	30.6944	32.0946	32.6207	20.1543	19.1203	19.0138	Fpgs	-0.407808	0.243579	-0.468044	1.48764e-27	9.07313e-24	3.73664e-12	4.16337e-08	-0.0606418	0.124072	1	-0.71203	4.50362e-86	3.97219e-82	-2.9232	NA
ENSMUSG00000009569	Mkl2	49.3374	48.6188	49.404	72.3237	70.1606	70.9987	45.8414	45.0056	44.4756	69.1276	70.6488	72.2346	Mkl2	0.535231	-0.123015	0.524597	1.90497e-83	1.66647e-79	3.22265e-05	0.288105	-0.0100734	0.70506	1	0.648173	4.18157e-120	4.00761e-116	-5.26906	NA
ENSMUSG00000009575	Cbx5	376.378	382.35	392.166	252.452	249.425	249.723	427.244	388.041	396.054	257.277	262.773	273.569	Cbx5	-0.614775	0.0738426	-0.536498	1.35922e-79	1.17641e-75	0.0219717	1	0.0785084	0.0161528	1	-0.610109	7.64263e-79	6.58947e-75	-8.26229	NA
ENSMUSG00000009585	Apobec3	34.3909	32.5731	35.3999	26.5108	25.2929	25.0209	29.1379	29.8434	31.0064	22.8023	23.384	24.7128	Apobec3	-0.414644	-0.186144	-0.529831	2.95948e-24	1.70821e-20	3.8987e-06	0.0368388	-0.115612	0.00619506	1	-0.344112	1.23199e-16	5.98992e-13	1.84863	NA
ENSMUSG00000009614	Sardh	129.685	131.577	130.156	47.8955	48.7148	49.4381	132.79	132.916	130.789	50.4835	50.5745	49.8457	Sardh	-1.42256	0.0186144	-1.37509	0	0	0.406988	1	0.0469146	0.0894076	1	-1.39426	0	0	-74.9024	NA
ENSMUSG00000009621	Vav2	52.4534	53.5624	53.8561	63.7699	60.7609	60.2485	51.9169	49.1437	51.4036	63.6006	62.1518	63.671	Vav2	0.208907	-0.0685874	0.244702	6.03945e-12	2.55771e-08	0.0281135	1	0.0359014	0.22652	1	0.313396	4.52022e-25	2.63032e-21	-4.56929	NA
ENSMUSG00000009630	Ppp2cb	95.6266	95.6407	95.6029	158.92	153.83	155.903	91.684	94.6301	94.014	164.95	162.887	160.298	Ppp2cb	0.708419	-0.0332718	0.766782	1.22999e-186	1.28989e-182	0.192581	1	0.0586156	0.0116555	1	0.800306	1.40662e-239	1.53983e-235	-24.0536	NA
ENSMUSG00000009633	G0s2	0.565457	0.498306	0.630291	0.240488	0.255641	0.167565	1.10342	0.942639	1.12525	0.216995	0.168808	0.152861	G0s2	-1.49886	0.941277	-1.6624	7.06953e-08	0.000243263	6.55709e-07	0.00642004	-0.343129	0.387766	1	-2.78356	4.73726e-30	2.97689e-26	-2.95722	CBP.dependent
ENSMUSG00000009640	Dmap1	23.5601	23.4517	22.9905	20.3437	20.447	21.7131	19.6313	21.3685	20.7994	20.8317	20.5921	20.8984	Dmap1	-0.162402	-0.179931	-0.167604	4.26476e-05	0.113997	7.45339e-06	0.0694432	-0.00547244	0.910595	1	0.0120564	0.770824	1	-0.0670058	NA
ENSMUSG00000009647	Mcu	23.3102	23.8511	22.6416	18.7579	20.2923	19.1721	29.5396	28.8337	29.1062	18.3068	17.7547	18.1997	Mcu	-0.263435	0.326019	-0.363168	1.51249e-11	6.28137e-08	4.51109e-19	5.34203e-15	-0.1005	0.0119357	1	-0.689955	3.09229e-76	2.63927e-72	-2.11631	NA
ENSMUSG00000009681	Bcr	80.5135	78.9126	74.9704	99.0586	88.496	90.8302	78.4785	72.4663	71.599	95.6695	92.4984	92.0906	Bcr	0.248371	-0.0748903	0.258245	1.10156e-09	4.20025e-06	0.0692977	1	0.00950768	0.813381	1	0.332769	3.20689e-16	1.53963e-12	-4.44342	NA
ENSMUSG00000009687	Fxyd5	6.18081	6.19087	6.09574	4.10095	4.24235	4.61801	7.78147	7.71264	7.54877	6.39062	5.75259	6.60569	Fxyd5	-0.511413	0.320805	0.019378	1.63549e-12	7.08823e-09	8.33326e-07	0.00812159	0.533375	7.19879e-14	8.93802e-10	-0.298856	2.77356e-06	0.00814871	-0.931581	NA
ENSMUSG00000009731	Kcnd1	4.13129	3.41117	4.48435	0.448729	0.771164	0.558482	2.10763	2.16753	2.40323	0.709653	0.578487	0.725776	Kcnd1	-2.83262	-0.857696	-2.57621	4.22274e-72	3.56399e-68	8.13801e-12	9.0218e-08	0.19879	0.368893	1	-1.77623	2.99019e-27	1.80518e-23	2.07093	NA
ENSMUSG00000009733	Tfcp2	37.7401	36.2516	37.7256	51.0832	49.9693	47.0626	36.1339	37.0603	34.9076	46.2344	46.7964	47.1319	Tfcp2	0.406405	-0.0473938	0.327459	3.64467e-32	2.35592e-28	0.188306	1	-0.078881	0.0175101	1	0.374919	2.51682e-27	1.52142e-23	-7.91071	NA
ENSMUSG00000009739	Pou6f1	36.4404	36.4347	36.1142	58.4998	55.262	55.0613	35.0962	34.2298	34.8403	54.471	56.3252	55.1225	Pou6f1	0.631734	-0.0653976	0.606164	5.55023e-92	4.98022e-88	0.0512343	1	-0.0249849	0.394499	1	0.672147	2.53367e-103	2.34212e-99	-10.2779	NA
ENSMUSG00000009741	Ubp1	92.1441	93.8098	95.1876	87.6214	90.1629	87.5375	104.337	101.864	99.0418	84.4924	81.437	86.0298	Ubp1	-0.0838906	0.118709	-0.158354	0.0032525	1	2.6053e-05	0.234685	-0.0742669	0.00902743	1	-0.276866	1.12642e-22	6.30008e-19	-2.33232	NA
ENSMUSG00000009772	Nuak2	15.562	15.5453	15.3322	4.75771	5.1703	6.19671	17.422	17.3131	16.646	7.09882	7.17888	6.68107	Nuak2	-1.52676	0.146225	-1.14848	5.14013e-144	5.14013e-140	0.00486347	1	0.375362	5.40488e-08	0.000654748	-1.29763	3.74305e-117	3.56526e-113	-8.87421	NA
ENSMUSG00000009828	Ick	44.9384	42.1939	43.922	25.1813	27.2175	25.7426	44.084	42.2413	44.3747	26.2355	24.7799	25.331	Ick	-0.747708	-0.00399233	-0.779444	7.20641e-91	6.44181e-87	0.914514	1	-0.0326609	0.403779	1	-0.776378	9.43175e-99	8.62156e-95	194.467	NA
ENSMUSG00000009863	Sdhb	52.0701	51.1655	48.7562	37.0991	37.528	37.1092	49.4398	54.9371	53.2701	38.1979	38.6331	37.3622	Sdhb	-0.444339	0.0528237	-0.412101	1.10916e-32	7.20846e-29	0.147295	1	0.0315231	0.411203	1	-0.46564	1.91743e-36	1.29484e-32	-8.81498	NA
ENSMUSG00000009876	Cox4i2	9.21344	9.03716	8.91984	0.512803	0.530587	0.498341	8.23337	9.46721	8.79312	0.555697	0.73022	0.439319	Cox4i2	-4.22404	-0.0362556	-4.00817	4.00686e-297	4.51052e-293	0.586812	1	0.17339	0.440957	1	-4.01455	2.89994e-288	3.25373e-284	110.729	NA
ENSMUSG00000009894	Snap47	71.8322	75.3506	71.3489	89.031	85.8325	87.8082	71.5159	73.2277	74.7098	94.0684	94.2737	94.5481	Snap47	0.265783	0.00606322	0.372825	1.46256e-21	8.04115e-18	0.833934	1	0.106766	7.70566e-05	0.881759	0.366486	2.2351e-40	1.56323e-36	60.4441	NA
ENSMUSG00000009905	Kdsr	28.3423	29.5604	29.2865	40.6552	41.9099	41.0184	32.1673	31.3497	31.0568	41.277	41.8954	41.3876	Kdsr	0.503232	0.117396	0.514824	6.03885e-60	4.82443e-56	0.000325159	1	0.0118434	0.690417	1	0.39768	1.13081e-39	7.85345e-36	3.38751	NA
ENSMUSG00000009907	Vps4b	72.0988	69.6414	70.0864	88.0699	88.4788	89.7026	69.1393	68.6426	70.2874	88.68	85.5642	90.5377	Vps4b	0.33019	-0.0258588	0.321694	1.82231e-33	1.19507e-29	0.360952	1	-0.00812245	0.764484	1	0.347927	4.05296e-37	2.7552e-33	-13.4548	NA
ENSMUSG00000009927	Rps25	331.088	327.521	331.514	179.439	191.79	184.665	332.764	356.823	353.393	192.138	187.984	180.169	Rps25	-0.833058	0.0750429	-0.821925	1.13971e-154	1.15703e-150	0.0152347	1	0.0114888	0.719291	1	-0.896613	1.451e-179	1.51441e-175	-11.948	NA
ENSMUSG00000009995	Taz	25.9595	26.0483	25.2664	52.8613	50.0896	50.9868	26.2591	25.2749	26.668	45.0643	49.1331	47.8857	Taz	0.995371	0.017135	0.877868	1.05959e-159	1.08163e-155	0.677004	1	-0.11577	0.000798418	1	0.862467	2.06116e-119	1.97171e-115	50.3337	NA
ENSMUSG00000010025	Aldh3a2	28.1923	30.1929	28.0572	50.6347	50.1067	49.8742	33.8912	33.5512	34.4872	47.8201	49.5276	48.338	Aldh3a2	0.801644	0.237937	0.753708	2.15573e-140	2.14646e-136	2.92415e-12	3.26481e-08	-0.047925	0.102909	1	0.515783	7.7757e-62	6.26488e-58	2.16773	NA
ENSMUSG00000010045	Tmem115	46.1882	50.3998	45.9155	58.8041	57.0663	57.7827	43.7325	48.5147	47.3678	60.9371	58.6923	57.2031	Tmem115	0.28549	-0.0294999	0.312221	8.81928e-13	3.86725e-09	0.469981	1	0.0260031	0.506921	1	0.340993	1.08529e-17	5.41125e-14	-11.5591	NA
ENSMUSG00000010047	Hyal2	69.3994	68.7758	69.2558	50.1702	49.196	50.5808	60.6369	63.4451	61.846	52.1155	52.2436	51.2629	Hyal2	-0.467913	-0.157892	-0.414626	8.81584e-68	7.29864e-64	2.07931e-09	2.20075e-05	0.05308	0.0546859	1	-0.256942	2e-21	1.0918e-17	1.62733	NA
ENSMUSG00000010048	Ifrd2	32.3914	34.4873	33.5891	10.9729	9.68972	9.45936	45.1217	47.2567	46.9138	10.3473	11.5184	10.5709	Ifrd2	-1.74132	0.47176	-1.63213	1.0754e-304	1.21413e-300	5.52439e-32	6.77235e-28	0.107697	0.0556726	1	-2.10539	0	0	-4.46285	NA
ENSMUSG00000010051	Hyal1	4.19794	4.29335	4.30161	3.12382	3.31441	3.32497	4.14955	3.85589	4.1016	3.71179	3.44624	3.69589	Hyal1	-0.393058	-0.0803565	-0.237868	1.30747e-06	0.00407015	0.30235	1	0.15397	0.0636357	1	-0.158736	0.0479971	1	1.9754	NA
ENSMUSG00000010054	Tusc2	12.7959	11.8002	11.7605	22.8746	24.554	23.0512	11.9657	13.1253	12.2403	23.4027	22.5039	23.1147	Tusc2	0.95566	0.0385268	0.925736	6.70314e-94	6.04288e-90	0.470082	1	-0.0291502	0.486287	1	0.887986	3.3059e-82	2.88308e-78	23.0485	NA
ENSMUSG00000010057	Nprl2	14.7955	14.9794	15.0664	27.8724	27.8705	27.8926	13.1038	14.4826	13.2829	27.2978	26.2972	24.6224	Nprl2	0.900647	-0.133839	0.801399	4.81315e-92	4.32029e-88	0.00745409	1	-0.0969891	0.018019	1	0.9375	2.07557e-96	1.88628e-92	-7.00469	NA
ENSMUSG00000010067	Rassf1	21.4439	22.5861	20.9471	28.385	27.6471	27.0506	21.2547	22.312	20.8162	27.3286	28.467	27.306	Rassf1	0.354703	-0.0130809	0.355387	2.39098e-19	1.25168e-15	0.756328	1	0.000723468	0.994684	1	0.368508	5.92826e-21	3.206e-17	-28.1715	NA
ENSMUSG00000010095	Slc3a2	153.98	157.626	152.567	98.3538	99.0814	98.4982	228.492	238.919	240.494	102.551	101.602	98.8902	Slc3a2	-0.649605	0.608996	-0.615169	8.58131e-130	8.39338e-126	7.57999e-125	9.54093e-121	0.0342747	0.212099	1	-1.22433	0	0	-2.0104	CBP.dependent
ENSMUSG00000010097	Nxf1	152.063	153.365	148.879	156.052	151.115	151.001	147.954	147.367	149.656	147.968	146.515	152.443	Nxf1	0.012223	-0.029954	-0.0237253	0.623013	1	0.228997	1	-0.0358273	0.146372	1	0.00634972	0.799757	1	-0.211982	NA
ENSMUSG00000010110	Stx5a	73.8817	76.3326	73.1098	89.1432	88.5476	86.891	65.1559	65.4976	66.6552	84.4924	84.5627	82.9843	Stx5a	0.24444	-0.178781	0.1747	2.46303e-21	1.34703e-17	2.35275e-11	2.59038e-07	-0.0698883	0.00558938	1	0.353333	1.23115e-41	8.71409e-38	-1.97635	NA
ENSMUSG00000010154	Spire2	4.48121	4.89257	4.86643	8.31381	8.31499	8.07612	4.9864	5.09733	4.38746	6.94486	6.5416	7.16353	Spire2	0.797998	0.0237443	0.536305	3.85581e-32	2.49086e-28	0.772791	1	-0.258962	2.69144e-05	0.312745	0.5153	8.37505e-14	3.72104e-10	21.7021	NA
ENSMUSG00000010277	2610507B11Rik	212.333	208.493	213.982	232.301	227.498	228.238	228.04	210.25	216.515	225.362	229.043	231.927	2610507B11Rik	0.116196	0.0447245	0.112571	2.75128e-05	0.0750274	0.10761	1	-0.00357828	0.897571	1	0.0678928	0.0140754	1	1.51802	NA
ENSMUSG00000010290	AI597479	32.2914	30.6589	30.765	28.0486	29.4858	28.7496	35.431	34.5443	33.4951	27.5287	26.7828	29.3414	AI597479	-0.119736	0.143043	-0.164522	0.00212093	1	0.000181053	1	-0.044161	0.25659	1	-0.30694	1.00508e-15	4.75201e-12	-2.14579	NA
ENSMUSG00000010307	Tmem86a	33.6411	31.8407	30.3829	8.82641	9.58661	8.72263	27.7487	29.711	30.3338	9.97779	8.84794	8.76166	Tmem86a	-1.82613	-0.12699	-1.79829	1.16192e-251	1.27904e-247	0.00938759	1	0.0253433	0.707088	1	-1.6738	1.82744e-211	1.96267e-207	13.1806	NA
ENSMUSG00000010311	Optc	0.88205	0.78127	1.22833	0.11234	0.100984	0.137495	0.936045	1.14127	0.906653	0.140017	0.0625944	0.152861	Optc	-3.41556	0.0472855	-3.10113	1.13714e-29	7.13898e-26	0.853538	1	0.0121724	1	1	-3.45144	1.5671e-31	1.00232e-27	-72.9916	NA
ENSMUSG00000010358	Ifi35	7.36387	6.65693	7.2586	11.8058	12.1299	12.6468	7.53042	7.18295	7.73374	12.0254	12.3985	11.5056	Ifi35	0.785194	0.07716	0.756453	1.41257e-43	1.02341e-39	0.227968	1	-0.027074	0.611074	1	0.680963	5.19663e-34	3.4277e-30	8.82534	NA
ENSMUSG00000010362	Rdm1	9.19678	8.42129	9.23547	12.2704	11.5284	10.9779	7.6141	8.1099	8.42318	11.8253	11.9433	11.4604	Rdm1	0.373183	-0.153863	0.392719	9.03199e-11	3.62634e-07	0.0133029	1	0.0195389	0.733868	1	0.546588	4.46747e-21	2.42405e-17	-3.55244	NA
ENSMUSG00000010376	Nedd8	74.9315	73.3698	77.8942	67.2779	68.7171	67.8564	70.8799	80.5108	78.6951	69.8974	67.341	69.5359	Nedd8	-0.15022	0.0246483	-0.129264	7.78037e-05	0.201512	0.516554	1	0.0206295	0.58978	1	-0.154239	4.58614e-05	0.117222	-6.25759	NA
ENSMUSG00000010392	Gosr1	53.4198	53.9951	54.6037	80.2849	82.7222	82.7112	52.1512	48.614	48.0573	75.7323	76.2629	78.2954	Gosr1	0.6011	-0.122661	0.507205	1.15979e-87	1.027e-83	0.000127814	1	-0.0935207	0.00134028	1	0.630241	2.92396e-94	2.64297e-90	-5.13806	NA
ENSMUSG00000010406	Mrpl52	24.2766	24.467	22.1931	16.3711	18.1271	16.9319	24.2172	27.7412	27.946	18.5839	18.7713	18.1092	Mrpl52	-0.46553	0.172008	-0.353736	4.77469e-17	2.36252e-13	0.0013342	1	0.110033	0.0522345	1	-0.527507	2.17853e-22	1.2117e-18	-3.06676	NA
ENSMUSG00000010453	Kansl3	81.18	80.3773	81.2665	87.7656	83.0315	86.0641	83.1816	81.5371	79.6872	84.908	83.2123	82.7883	Kansl3	0.0815299	0.00939208	0.0471839	0.00289737	1	0.735635	1	-0.0343091	0.207638	1	0.0378288	0.164891	1	4.02773	NA
ENSMUSG00000010461	Eya4	56.4858	55.6929	57.0291	21.3048	22.0451	22.1491	56.6535	53.5963	54.1109	20.7547	22.0335	22.8433	Eya4	-1.3704	-0.041994	-1.36739	0	0	0.187241	1	0.00315079	0.946102	1	-1.32526	0	0	31.5583	NA
ENSMUSG00000010476	Ebf3	0.148887	0.182052	0.26482	1.13752	1.11485	1.15989	0.13267	0.098458	0.200403	1.35627	1.48889	1.26854	Ebf3	2.71779	-0.570841	2.82641	1.34762e-30	8.55605e-27	0.206003	1	0.275122	0.0569385	1	3.5645	1.85936e-47	1.38187e-43	-6.2443	NA
ENSMUSG00000010492	Uckl1os	0.232201	0.231987	0.364494	1.29771	1.18358	1.03961	0.333514	0.297089	0.385373	1.00217	1.21577	1.04239	Uckl1os	2.21278	0.32479	2.00512	2.58341e-24	1.49269e-20	0.325276	1	-0.110311	0.474096	1	1.77781	2.12388e-17	1.05132e-13	5.47372	NA
ENSMUSG00000010517	Faf1	50.5038	49.8339	50.3842	48.6804	47.2198	47.5738	62.4277	62.0547	64.7214	51.6844	54.0492	51.4589	Faf1	-0.071006	0.328163	0.060311	0.0183201	1	2.43533e-29	2.97232e-25	0.131705	8.57191e-06	0.100746	-0.267465	1.27395e-20	6.82836e-17	-0.815037	NA
ENSMUSG00000010538	Tsacc	1.28196	0.947719	1.01237	0.737062	0.547771	0.738905	1.23731	1.17437	0.822576	0.709653	0.927473	0.620239	Tsacc	-0.697615	-0.00275777	-0.530387	0.000405439	0.945888	1	1	0.157156	0.486331	1	-0.537753	0.00544412	1	194.996	NA
ENSMUSG00000010554	Mettl16	37.9567	38.7151	38.5894	28.0646	27.8018	28.0279	45.356	44.4593	44.2234	30.4847	30.1361	29.8238	Mettl16	-0.45849	0.217891	-0.349805	7.57247e-52	5.78233e-48	8.23803e-15	9.47539e-11	0.108286	0.000536871	1	-0.568096	3.94063e-87	3.49258e-83	-2.60725	NA
ENSMUSG00000010601	Apol7a	1.78184	1.48036	1.49413	0.576877	0.685244	0.708835	1.94026	1.98545	1.68017	0.817422	0.972993	0.575009	Apol7a	-1.31006	0.241817	-1.03577	1.15244e-14	5.37035e-11	0.0791987	1	0.272878	0.172245	1	-1.2791	2.78452e-16	1.3388e-12	-5.28953	NA
ENSMUSG00000010607	Pigyl	8.01372	8.83742	8.58759	10.8287	11.0301	10.9328	7.99905	9.02029	9.26395	12.1024	11.9281	11.1287	Pigyl	0.36724	0.047277	0.467126	8.31748e-10	3.18892e-06	0.458024	1	0.100803	0.0734596	1	0.420768	5.65704e-13	2.43932e-09	8.90005	NA
ENSMUSG00000010608	Rbm25	167.343	164.384	170.973	178.35	180.465	183.357	170.549	167.643	169.381	173.71	174.116	180.335	Rbm25	0.109168	0.0139034	0.0712496	9.63352e-06	0.027706	0.575955	1	-0.0378504	0.122612	1	0.057414	0.0197746	1	4.1295	NA
ENSMUSG00000010609	Psen2	8.61358	7.48918	7.97293	16.4993	17.2679	16.5861	8.85264	8.60648	8.03642	16.6595	15.8428	16.1342	Psen2	1.06656	0.0831522	1.01652	1.92932e-93	1.73755e-89	0.17214	1	-0.0494383	0.284286	1	0.933969	3.36891e-73	2.83999e-69	11.232	NA
ENSMUSG00000010660	Plcd1	40.8727	40.6126	41.1643	40.8314	37.5452	38.1316	36.4352	39.8081	38.7583	34.4106	35.8564	35.4776	Plcd1	-0.0739299	-0.0928859	-0.214157	0.0463225	1	0.0128509	1	-0.140124	0.000176746	1	-0.121167	0.00125761	1	1.30448	NA
ENSMUSG00000010663	Fads1	327.506	328.553	326.331	195.458	193.921	197.145	314.838	319.182	319.358	222.714	222.169	219.836	Fads1	-0.744068	-0.0432484	-0.56357	2.15807e-274	2.40345e-270	0.0354539	1	0.18044	2.69724e-17	3.36777e-13	-0.52038	1.70922e-137	1.69383e-133	12.0323	NA
ENSMUSG00000010721	Lmbr1	6.53073	5.7581	6.09574	8.32983	8.74459	8.01598	5.99062	5.8753	6.13627	7.28356	7.43682	8.18874	Lmbr1	0.448643	-0.0305702	0.317444	1.25796e-11	5.25322e-08	0.681192	1	-0.129398	0.038946	1	0.34982	2.04818e-07	0.00066873	-11.4432	NA
ENSMUSG00000010751	Tnfrsf22	10.963	10.6184	10.5478	5.89502	6.63094	6.27188	11.0452	11.2383	11.2482	5.0512	5.99536	5.77647	Tnfrsf22	-0.777737	0.0618359	-0.937096	1.82313e-38	1.26434e-34	0.263128	1	-0.158772	0.0185313	1	-0.99835	8.21862e-63	6.65379e-59	-16.1452	NA
ENSMUSG00000010755	Cars	64.084	65.8297	66.9799	46.598	44.5047	46.4311	110.982	111.514	113.604	51.7768	51.3029	53.4339	Cars	-0.517224	0.771717	-0.33111	1.25246e-68	1.04092e-64	4.88229e-179	6.15413e-175	0.185971	6.30821e-10	7.73954e-06	-1.10297	0	0	-1.42924	CBP.dependent
ENSMUSG00000010825	Grid2ip	0.382166	0.448371	0.298045	1.60206	1.11485	1.37039	0.249829	0.330194	0.486266	1.09454	1.21577	1.17808	Grid2ip	1.94977	-0.0902802	1.64666	1.82955e-21	1.00387e-17	0.793977	1	-0.238411	0.137652	1	1.80183	2.11188e-17	1.04559e-13	-19.9581	NA
ENSMUSG00000010830	Kdelr3	30.8584	29.2608	30.9976	19.1263	19.0207	19.0368	30.7111	34.2133	31.6958	20.3082	20.9866	19.9637	Kdelr3	-0.672949	0.0848485	-0.572627	2.45695e-55	1.91298e-51	0.0374436	1	0.0994203	0.0272001	1	-0.658379	2.18877e-55	1.70746e-51	-7.75946	NA
ENSMUSG00000010911	Apip	17.2116	18.8077	18.2227	15.8425	16.5462	16.4357	18.9785	20.2429	19.8577	17.0444	17.4967	17.0689	Apip	-0.152273	0.123499	-0.0708977	0.000556674	1	0.00408185	1	0.0803945	0.06756	1	-0.195379	4.62289e-06	0.0132862	-1.58202	NA
ENSMUSG00000010914	Pdhx	31.5249	32.107	33.722	38.4446	39.7963	40.1163	32.5857	34.2795	34.4199	41.4617	39.0277	39.7443	Pdhx	0.282148	0.0571551	0.304651	3.6909e-15	1.73583e-11	0.121326	1	0.022491	0.517053	1	0.247484	2.83913e-12	1.19669e-08	4.33004	NA
ENSMUSG00000010936	Vac14	43.8887	46.7046	43.7226	50.0901	46.2575	48.2804	51.2976	51.7921	50.9664	48.0356	48.7689	48.1872	Vac14	0.107398	0.197982	0.110974	0.00130454	1	2.45957e-09	2.59657e-05	0.00303329	0.922654	1	-0.0875503	0.00732085	1	-0.442214	NA
ENSMUSG00000011096	Akt1s1	99.3091	96.6062	91.9814	88.0219	85.5747	82.9217	92.4706	98.2055	98.4701	85.1698	82.4233	83.9944	Akt1s1	-0.166752	0.00627447	-0.193899	4.77326e-07	0.00154129	0.85114	1	-0.0278155	0.401475	1	-0.200842	1.19208e-09	4.47747e-06	-32.0095	NA
ENSMUSG00000011114	Tbrg1	28.8922	31.4246	30.25	34.8885	35.7408	35.4253	32.0166	34.6768	35.1766	28.9297	33.4742	31.3918	Tbrg1	0.227863	0.169837	0.0488268	1.34918e-06	0.0041919	0.000346491	1	-0.177118	0.000147927	1	-0.119091	0.0112789	1	-0.701208	NA
ENSMUSG00000011148	Adssl1	1.6652	1.59687	1.62703	1.08947	0.977374	0.994505	1.62226	1.58819	1.57927	1.2485	1.33715	1.17808	Adssl1	-0.691166	-0.030183	-0.379131	4.78158e-07	0.00154349	0.86953	1	0.305473	0.0354508	1	-0.355547	0.00597355	1	11.7797	NA
ENSMUSG00000011158	Brf1	25.6096	27.1302	25.9308	26.9433	26.7535	27.3363	23.5645	25.7549	24.3474	25.6813	26.7524	26.4768	Brf1	0.0431371	-0.0947519	0.00462029	0.261341	1	0.0146683	1	-0.0386341	0.307555	1	0.0992553	0.00960083	1	-1.04753	NA
ENSMUSG00000011179	Odc1	190.838	196.759	184.196	115.878	115.183	113.819	256.108	260.189	253.761	122.596	121.828	122.138	Odc1	-0.72964	0.429554	-0.640911	6.72231e-172	6.9502e-168	1.83539e-65	2.29607e-61	0.0880815	0.00095697	1	-1.07111	0	0	-2.49355	NA
ENSMUSG00000011254	Thg1l	9.16345	10.0192	9.8169	7.20854	8.12596	7.62506	9.95728	10.4769	10.5251	7.06802	6.67816	6.93738	Thg1l	-0.339835	0.094624	-0.486903	1.07737e-08	3.90008e-05	0.0962729	1	-0.149686	0.0161422	1	-0.584147	3.3497e-23	1.89225e-19	-6.17335	NA
ENSMUSG00000011256	Adam19	18.5446	17.2764	17.5749	1.50595	1.54445	1.44556	17.4889	17.1476	17.2345	1.29468	1.29163	1.40423	Adam19	-3.599	-0.0418735	-3.74251	0	0	0.344022	1	-0.17339	0.186191	1	-3.73056	0	0	89.0913	NA
ENSMUSG00000011257	Pabpc4	181.923	186.439	181.904	92.8114	92.4656	90.304	225.613	233.771	228.79	91.8822	89.9341	92.1811	Pabpc4	-0.998149	0.322714	-1.00596	0	0	1.30592e-42	1.61922e-38	-0.0080611	0.755877	1	-1.32892	0	0	-4.11797	NA
ENSMUSG00000011267	Zfp296	2.23174	2.01299	1.79315	1.53799	1.52727	1.22003	3.06164	2.25029	2.63865	1.43324	1.67097	1.55499	Zfp296	-0.508519	0.401929	-0.371044	0.000449541	1	0.0019582	1	0.128528	0.417628	1	-0.781955	4.69936e-09	1.71339e-05	-1.9455	NA
ENSMUSG00000011306	Sugp1	48.9875	48.1528	47.4272	56.6577	55.8462	57.8128	46.2263	47.3891	49.5875	56.0105	55.2327	53.3133	Sugp1	0.237087	-0.0137381	0.186658	4.31176e-14	1.97478e-10	0.673137	1	-0.0502217	0.103786	1	0.200604	1.59442e-10	6.24692e-07	-14.602	NA
ENSMUSG00000011427	Zfp790	12.3127	13.3149	12.9732	18.3895	18.0412	18.255	11.8988	11.6853	12.0553	17.3831	17.8912	17.28	Zfp790	0.503804	-0.115572	0.445769	3.37205e-32	2.18104e-28	0.0147008	1	-0.0577435	0.147318	1	0.561635	1.69165e-38	1.16555e-34	-4.85961	NA
ENSMUSG00000011589	Fsd1	16.3284	14.8795	14.9501	18.4375	16.4774	17.4732	14.3089	15.8896	14.6113	18.2452	18.3616	18.3354	Fsd1	0.183999	-0.0426069	0.252656	0.000363004	0.854873	0.423284	1	0.0678324	0.171424	1	0.294439	7.62053e-09	2.74339e-05	-6.91059	NA
ENSMUSG00000011658	Fuz	4.91444	4.70947	4.78337	7.91335	6.81997	7.20407	4.55123	4.96491	4.52198	7.37594	7.42165	7.05799	Fuz	0.611041	-0.0373459	0.601068	6.50851e-18	3.29591e-14	0.645582	1	-0.00684928	0.93651	1	0.641544	1.18283e-19	6.19331e-16	-17.1784	NA
ENSMUSG00000011751	Sptbn4	1.41526	1.39713	1.09544	0.592895	0.530587	0.603588	1.1871	1.32335	1.12525	0.709653	0.6847	0.469472	Sptbn4	-1.21787	-0.10598	-1.0824	6.25384e-12	2.64663e-08	0.490083	1	0.110247	0.65253	1	-1.00172	1.47196e-08	5.20632e-05	9.45195	NA
ENSMUSG00000011752	Pgam1	174.375	175.486	173.149	174.201	169.811	173.93	177.628	187.54	190.938	178.159	177.651	174.771	Pgam1	-0.0139053	0.0885364	0.0207037	0.601544	1	0.000895848	1	0.0346288	0.191829	1	-0.067813	0.0106172	1	-0.765934	NA
ENSMUSG00000011831	Evi5	65.0837	62.8502	63.0926	95.5826	94.184	96.3933	73.1729	68.8909	68.3368	92.8829	91.4514	94.141	Evi5	0.58351	0.139422	0.543852	7.39131e-91	6.60635e-87	2.91468e-06	0.0277128	-0.0394983	0.157001	1	0.404589	1.79333e-45	1.31092e-41	2.9019	NA
ENSMUSG00000011832	Evi5l	31.5416	30.9252	30.25	72.0674	70.8136	70.2019	26.6273	26.0694	27.9123	72.9303	70.8764	72.0838	Evi5l	1.20122	-0.202248	1.21951	0	0	6.80701e-09	7.10379e-05	0.0189646	0.481373	1	1.42243	0	0	-7.03311	NA
ENSMUSG00000011837	Snapc2	27.9757	28.828	27.2432	26.4628	25.3444	24.2691	26.1419	26.5991	27.2061	26.5126	25.4627	25.5722	Snapc2	-0.144662	-0.0722475	-0.115967	0.000168349	0.418852	0.0597482	1	0.0283105	0.468957	1	-0.0441043	0.251574	1	0.610461	NA
ENSMUSG00000011877	Git1	71.4156	68.8424	70.8671	98.4179	89.7333	91.1761	81.0895	82.6461	82.1255	105.353	104.516	107.454	Git1	0.404164	0.219844	0.587934	4.71167e-37	3.21995e-33	8.00152e-12	8.87289e-08	0.183913	2.278e-09	2.78667e-05	0.368233	2.50736e-32	1.61975e-28	1.67498	NA
ENSMUSG00000011884	Gltp	39.1731	40.2464	39.9849	60.2298	57.8568	60.2335	36.703	37.4079	38.8424	60.2135	60.0579	58.6656	Gltp	0.579571	-0.0802607	0.583592	6.18245e-83	5.40161e-79	0.0128607	1	0.00432891	0.872915	1	0.664162	3.53394e-108	3.29858e-104	-8.27506	NA
ENSMUSG00000011958	Bnip2	130.802	136.754	135.09	156.068	158.727	156.895	138.397	140.53	140.307	164.457	165.148	169.268	Bnip2	0.228277	0.0582587	0.309299	5.6157e-21	3.04483e-17	0.0177364	1	0.0809726	0.000691012	1	0.250991	1.92432e-25	1.12688e-21	4.30821	NA
ENSMUSG00000011960	Ccnt1	83.6794	84.3222	86.2169	124.56	121.936	123.487	85.1398	80.246	79.3173	114.606	115.289	118.987	Ccnt1	0.541646	-0.0550723	0.456591	1.12518e-81	9.79469e-78	0.0601718	1	-0.0848015	0.00209459	1	0.511917	1.26867e-72	1.06708e-68	-9.29537	NA
ENSMUSG00000012017	Scarf2	284.749	280.416	266.311	235.248	207.874	208	264.041	281.922	271.602	246.746	252.971	238.772	Scarf2	-0.352774	-0.0243299	-0.170913	6.12758e-18	3.10668e-14	0.550666	1	0.181653	8.79642e-06	0.103361	-0.146791	0.0003169	0.712485	6.03335	NA
ENSMUSG00000012076	Brms1l	39.673	41.4615	39.8187	32.2775	35.5346	36.1019	43.6488	41.6619	42.1382	35.088	35.5226	35.161	Brms1l	-0.219058	0.0754935	-0.193229	6.78117e-09	2.4792e-05	0.0425697	1	0.0254171	0.505402	1	-0.269135	5.50829e-13	2.37738e-09	-3.56501	NA
ENSMUSG00000012114	Med15	73.1152	73.2367	71.7642	98.6421	95.9711	93.8674	67.7166	72.0524	69.6652	94.9767	91.4363	91.7438	Med15	0.403342	-0.0585533	0.35065	5.06182e-44	3.67944e-40	0.0503388	1	-0.0524627	0.0633432	1	0.409433	4.57455e-45	3.33256e-41	-6.99248	NA
ENSMUSG00000012117	Dhdds	31.225	31.2914	29.9012	25.0051	25.0351	24.5548	31.6652	32.227	31.3931	24.3573	24.6737	25.1199	Dhdds	-0.309859	0.0442259	-0.317505	3.31031e-20	1.76837e-16	0.175566	1	-0.00805884	0.815483	1	-0.362144	8.66141e-28	5.27307e-24	-8.1885	NA
ENSMUSG00000012126	Ubxn11	1.46525	1.38049	1.52736	1.90641	1.95687	1.86655	1.73942	1.35645	1.51201	1.97209	1.95926	2.14299	Ubxn11	0.395605	0.0764042	0.474099	0.00137472	1	0.585175	1	0.0872873	0.442457	1	0.406494	0.000688135	1	5.32031	NA
ENSMUSG00000012296	Tjap1	75.1147	74.9344	74.9039	69.2322	66.1395	66.5032	69.4573	72.0856	69.8165	65.3095	62.4552	60.716	Tjap1	-0.156145	-0.0899107	-0.255859	1.70957e-07	0.000570998	0.00260606	1	-0.0993156	0.000991778	1	-0.16555	3.8333e-08	0.000132019	1.84127	NA
ENSMUSG00000012405	Rpl15	201.019	203.533	196.024	122.51	127.006	123.442	198.667	215.381	207.956	126.676	126.699	126.511	Rpl15	-0.687667	0.0506145	-0.660605	2.54904e-126	2.47818e-122	0.0726404	1	0.0267616	0.362341	1	-0.71152	2.31332e-136	2.2888e-132	-14.0576	NA
ENSMUSG00000012422	Tmem167	77.5308	78.7461	76.1831	50.9551	52.0314	53.7232	78.3279	81.0736	78.4092	55.4717	54.7017	55.0019	Tmem167	-0.56866	0.0329085	-0.492877	3.98383e-91	3.56394e-87	0.225274	1	0.0754263	0.00914994	1	-0.526143	2.27795e-80	1.97544e-76	-15.9881	NA
ENSMUSG00000012428	Steap4	5.29769	5.05902	5.38141	0.192433	0.135352	0.122459	3.44659	3.83934	3.93344	0.109226	0.0625944	0.0774779	Steap4	-5.44653	-0.491629	-6.01824	1.86274e-227	2.02274e-223	1.56445e-09	1.66176e-05	-1.1823	0.0355521	1	-6.1372	4.7758e-181	4.99358e-177	12.4834	NA
ENSMUSG00000012429	Mplkip	16.895	16.9601	16.7442	22.1218	21.9248	21.4274	16.2002	15.9724	16.1919	20.8779	20.7286	20.9135	Mplkip	0.371799	-0.0653361	0.305208	1.75548e-23	1.00097e-19	0.106299	1	-0.0661025	0.0590716	1	0.371034	6.3989e-23	3.59682e-19	-5.67885	NA
ENSMUSG00000012443	Kif11	95.36	92.7945	96.8986	22.5062	21.478	20.8561	87.9851	78.0776	78.4429	22.3866	22.0184	22.4965	Kif11	-2.13821	-0.221468	-2.09095	0	0	1.55827e-08	0.00016125	0.0455929	0.343169	1	-1.87115	0	0	8.44888	NA
ENSMUSG00000012483	Rpa3	59.1685	58.5891	57.8265	27.1676	28.1111	28.6143	57.1054	61.6409	59.4077	29.8535	30.5306	30.3515	Rpa3	-1.06603	0.0210638	-0.952423	6.00715e-226	6.51475e-222	0.497828	1	0.112977	0.0017731	1	-0.97412	1.49133e-195	1.57872e-191	-46.2462	NA
ENSMUSG00000012519	Mlkl	39.9229	40.2131	39.7191	23.6595	22.5434	23.4271	44.2681	47.0912	45.8881	23.8492	23.7785	24.562	Mlkl	-0.783431	0.195709	-0.731563	3.37206e-117	3.22032e-113	3.41625e-10	3.68237e-06	0.0513716	0.161155	1	-0.92777	7.639e-176	7.94075e-172	-4.74056	NA
ENSMUSG00000012535	Tnpo3	135.267	133.991	138.496	123.743	128.071	124.314	146.314	140.133	139.752	125.783	120.979	125.305	Tnpo3	-0.116747	0.0638287	-0.132219	1.6128e-05	0.0450615	0.0177056	1	-0.0154423	0.566548	1	-0.196018	3.18548e-13	1.38728e-09	-3.071	NA
ENSMUSG00000012609	Ttll5	16.795	17.4096	17.525	9.09872	8.76177	9.18873	17.7735	16.5517	18.3275	8.97708	8.69621	9.28934	Ttll5	-0.936569	0.0252902	-0.940301	1.55507e-76	1.33332e-72	0.58777	1	-0.005721	0.938628	1	-0.967584	1.52955e-83	1.33851e-79	-38.2593	NA
ENSMUSG00000012640	Zfp715	15.8286	17.4262	16.5947	26.655	27.4753	25.923	17.3885	15.4096	15.7547	24.8191	25.0682	27.6678	Zfp715	0.683718	-0.0381973	0.637003	7.4758e-40	5.24651e-36	0.492711	1	-0.0449789	0.360028	1	0.676938	6.34846e-39	4.39059e-35	-17.7221	NA
ENSMUSG00000012848	Rps5	434.014	447.764	425.042	224.884	223.546	220.524	451.278	486.942	479.845	224.5	227.799	215.192	Rps5	-0.966218	0.11788	-0.96933	1.51639e-215	1.63361e-211	9.85138e-05	0.850568	-0.00313443	0.920031	1	-1.08723	9.13934e-273	1.01721e-268	-9.22324	NA
ENSMUSG00000012889	Podnl1	25.3763	25.5323	24.3859	3.20391	3.67528	3.68582	20.8028	21.5837	21.4047	3.55783	3.53728	3.46974	Podnl1	-2.84389	-0.239433	-2.83306	0	0	6.0394e-10	6.47424e-06	-0.000158096	1	1	-2.60464	0	0	10.8784	NA
ENSMUSG00000013033	Adgrl1	100.326	100.401	100.437	85.0264	82.516	78.2307	107.249	107.806	105.734	90.1425	93.4088	91.8795	Adgrl1	-0.293839	0.0911251	-0.129011	1.15316e-24	6.70562e-21	0.00122097	1	0.164977	8.99917e-09	0.000109646	-0.219987	5.57774e-15	2.58138e-11	-2.41412	NA
ENSMUSG00000013076	Amotl1	230.229	224.622	235.545	188.266	177.922	178.787	247.271	222.615	220.736	174.941	175.026	181.134	Amotl1	-0.341266	0.000462709	-0.378359	1.46549e-20	7.87992e-17	0.990572	1	-0.0372171	0.312676	1	-0.378945	5.36899e-25	3.11939e-21	-818.972	NA
ENSMUSG00000013089	Etv5	101.825	102.731	102.547	112.482	107.983	109.534	102.831	103.552	100.337	111.173	112.922	115.535	Etv5	0.103922	-0.00177	0.145067	5.10369e-05	0.135248	0.947281	1	0.04141	0.100956	1	0.147102	7.77435e-09	2.79566e-05	-83.1083	NA
ENSMUSG00000013150	Gfod2	33.8244	37.6165	33.7719	24.4444	24.0213	23.5775	29.5228	30.2076	29.9134	25.0962	23.8847	24.4414	Gfod2	-0.547225	-0.231217	-0.517455	3.71186e-40	2.6139e-36	1.13132e-08	0.000117477	0.027587	0.523951	1	-0.28842	4.86016e-12	2.02717e-08	1.2474	NA
ENSMUSG00000013155	Enkd1	25.2597	25.499	24.6517	10.1239	9.43195	9.56461	27.4976	30.5717	29.1903	9.96239	9.56109	9.40996	Enkd1	-1.37513	0.210919	-1.3823	1.99073e-179	2.07454e-175	6.54682e-07	0.00641065	-0.00988914	0.875521	1	-1.59595	1.81791e-257	2.0097e-253	-7.56663	NA
ENSMUSG00000013160	Atp6v0d1	79.547	80.7935	79.6717	230.955	228.134	230.959	78.3111	80.2129	82.445	248.286	245.385	234.731	Atp6v0d1	1.524	0.00571931	1.60124	0	0	0.846417	1	0.0779526	0.00219764	1	1.59624	0	0	279.096	NA
ENSMUSG00000013236	Ptprs	366.913	363.175	354.522	401.328	370.986	370.817	373.301	354.605	351.762	414.081	431.136	423.582	Ptprs	0.0758278	-0.00659123	0.226239	0.0172255	1	0.836698	1	0.150486	2.09749e-06	0.0249329	0.232905	2.30169e-13	1.00883e-09	-35.3355	NA
ENSMUSG00000013275	Slc41a1	45.4883	46.6048	48.3242	87.0287	85.7638	87.8533	48.4021	49.5906	48.36	82.2138	82.1654	81.4314	Slc41a1	0.893084	0.0598005	0.808258	5.06797e-237	5.53118e-233	0.0432352	1	-0.0849009	0.000839527	1	0.748383	1.10696e-167	1.14172e-163	12.5147	NA
ENSMUSG00000013367	Iglon5	35.0074	37.1338	35.5328	15.2018	14.8449	14.7518	31.0459	32.8725	32.3852	18.8302	18.225	17.8228	Iglon5	-1.26699	-0.161092	-0.972283	3.46105e-233	3.77047e-229	5.56449e-06	0.0521671	0.293257	1.56148e-11	1.92671e-07	-0.81264	7.02827e-100	6.44493e-96	5.04458	NA
ENSMUSG00000013415	Igf2bp1	107.291	109.323	111.086	87.5894	84.4062	84.3801	113.542	107.839	108.425	84.9696	82.8026	85.0799	Igf2bp1	-0.354217	0.00922403	-0.374044	4.40155e-37	3.00978e-33	0.738088	1	-0.0199945	0.480617	1	-0.383435	1.90701e-43	1.37209e-39	-41.5692	NA
ENSMUSG00000013419	Zfp651	23.7267	22.5196	22.8077	41.4401	39.676	38.1918	25.6566	26.566	25.6591	41.6003	40.0746	41.267	Zfp651	0.789167	0.173877	0.832353	8.94481e-102	8.24979e-98	1.13293e-05	0.104377	0.0438203	0.201518	1	0.659111	5.08384e-75	4.32127e-71	3.79067	NA
ENSMUSG00000013465	Nelfb	97.4762	96.3731	94.3071	87.4772	85.4888	86.5302	86.8972	87.5291	88.0445	83.3839	83.6979	82.3511	Nelfb	-0.151002	-0.134735	-0.2081	4.41339e-10	1.71328e-06	2.92746e-08	0.000300211	-0.0572803	0.0190481	1	-0.073548	0.0026392	1	0.545873	NA
ENSMUSG00000013495	Tmem175	20.4108	19.5235	19.7843	30.9159	29.503	30.2832	21.2213	22.5437	21.926	27.6057	27.7387	28.0749	Tmem175	0.604282	0.137843	0.482417	9.98669e-63	8.08023e-59	0.00038221	1	-0.12139	0.000334093	1	0.34505	6.79287e-22	3.74695e-18	2.50321	NA
ENSMUSG00000013539	Tango2	5.08107	5.92455	5.4977	9.88363	8.98517	9.4744	4.88597	4.60076	4.2193	10.5166	9.01485	9.80195	Tango2	0.784425	-0.26945	0.829769	2.4308e-26	1.45264e-22	0.00129933	1	0.048567	0.475031	1	1.10245	1.01322e-47	7.54341e-44	-4.09149	NA
ENSMUSG00000013593	Ndufs2	165.86	167.314	164.012	189.355	185.689	188.89	154.18	164.432	165.682	185.564	183.508	183.953	Ndufs2	0.18187	-0.0379016	0.153589	7.35871e-12	3.10022e-08	0.157315	1	-0.0282925	0.283642	1	0.191479	5.40602e-13	2.33486e-09	-5.05202	NA
ENSMUSG00000013622	Atraid	16.5617	16.9435	15.1993	23.8838	25.8771	24.4495	15.2294	17.1807	16.9991	25.5889	24.9923	22.8282	Atraid	0.607893	0.0208614	0.591745	1.19616e-28	7.42095e-25	0.722662	1	-0.0152138	0.772695	1	0.571819	9.97317e-26	5.87819e-22	27.4104	NA
ENSMUSG00000013629	Cad	136.917	145.742	141.503	49.161	44.4532	44.6118	160.808	152.581	152.095	44.2791	47.0543	46.0463	Cad	-1.61815	0.134134	-1.62643	0	0	0.000122879	1	-0.00886722	0.824211	1	-1.76115	0	0	-13.1298	NA
ENSMUSG00000013646	Sh3bp5l	21.3273	20.5555	21.2794	26.3186	26.238	25.8628	18.3425	19.1008	18.193	21.2935	22.5646	22.3458	Sh3bp5l	0.312242	-0.183161	0.0676002	2.32182e-17	1.15812e-13	3.68039e-06	0.0348202	-0.244091	1.1064e-11	1.3664e-07	0.251314	7.51083e-11	2.9833e-07	-1.37209	NA
ENSMUSG00000013662	Atad1	97.1096	98.77	99.1247	101.429	103.395	109.128	115.802	120.237	117.253	108.402	107.277	112.128	Atad1	0.0902528	0.260223	0.151908	0.00225138	1	6.89421e-19	8.15792e-15	0.0619273	0.0329532	1	-0.108043	0.00019254	0.449519	-0.415193	NA
ENSMUSG00000013663	Pten	207.917	211.506	213.982	160.393	161.494	160.91	208.542	193.052	195.277	156.236	157.653	164.263	Pten	-0.391799	-0.0857435	-0.405907	3.36048e-41	2.3883e-37	0.00306824	1	-0.0138975	0.636079	1	-0.319953	4.96821e-28	3.03608e-24	3.73152	NA
ENSMUSG00000013698	Pea15a	145.765	149.537	145.357	216.939	221.828	222.99	143.468	151.207	148.345	236.462	232.518	230.344	Pea15a	0.586761	0.00774007	0.666331	6.02903e-119	5.77702e-115	0.766792	1	0.0796284	0.00124075	1	0.658649	1.15741e-150	1.16748e-146	85.096	NA
ENSMUSG00000013701	Timm23	40.9061	41.1785	41.4301	26.4628	26.6332	27.201	48.1846	51.6597	49.1335	28.5602	27.0559	26.6879	Timm23	-0.621444	0.270698	-0.58625	1.3648e-69	1.13879e-65	1.68049e-16	1.95962e-12	0.0350466	0.342863	1	-0.857096	1.5802e-140	1.57404e-136	-3.16625	NA
ENSMUSG00000013736	Trnt1	40.8894	43.5587	42.3604	36.7467	38.0263	37.4851	53.758	51.0472	52.2443	38.5828	37.4345	39.0508	Trnt1	-0.176238	0.308698	-0.139911	1.08849e-07	0.000369107	3.96456e-22	4.75271e-18	0.035965	0.282672	1	-0.448972	5.62783e-45	4.09818e-41	-1.45441	NA
ENSMUSG00000013787	Ehmt2	292.664	290.603	284.85	305.681	291.097	297.475	262.117	267.191	267.348	307.282	304.955	297.013	Ehmt2	0.0428922	-0.123942	0.0667289	0.0836104	1	6.30859e-07	0.00618053	0.0238861	0.331855	1	0.190721	1.38357e-14	6.32844e-11	-1.53878	NA
ENSMUSG00000013822	Elof1	42.0558	41.7445	40.3171	33.8153	32.5789	33.8917	37.8244	40.5364	40.0195	37.2126	35.5226	36.156	Elof1	-0.307126	-0.0682535	-0.188839	2.69265e-19	1.40691e-15	0.0432773	1	0.118082	0.000594155	1	-0.120791	0.000373555	0.829291	1.76974	NA
ENSMUSG00000013833	Med16	36.0239	33.655	33.2236	26.8632	24.5196	24.7352	28.8031	30.9359	29.3585	26.3587	25.66	24.4716	Med16	-0.435231	-0.207898	-0.427693	2.92172e-23	1.65924e-19	1.61725e-06	0.0155644	0.00673036	0.882998	1	-0.220603	6.30391e-07	0.00197713	1.06111	NA
ENSMUSG00000013846	St3gal1	341.036	337.658	340.751	23.4513	20.7047	21.8935	266.117	265.37	265.667	21.3089	21.2142	21.6824	St3gal1	-3.94871	-0.354892	-3.98899	0	0	1.94323e-51	2.42165e-47	-0.0420976	0.283863	1	-3.63592	0	0	10.2451	NA
ENSMUSG00000013858	Tmem259	98.0261	94.0428	90.9514	159.384	152.988	149.588	87.9349	94.7129	91.7944	151.355	154.451	146.126	Tmem259	0.706971	-0.0443691	0.6755	1.34856e-96	1.2249e-92	0.201497	1	-0.0316039	0.340177	1	0.719737	6.48613e-100	5.94908e-96	-16.2216	NA
ENSMUSG00000013878	Rnf170	23.7267	22.9856	22.6748	27.0875	27.733	28.494	23.8825	22.5106	22.9518	26.6512	25.1289	27.1703	Rnf170	0.2647	-0.000937214	0.185748	1.78918e-11	7.41436e-08	0.988967	1	-0.0781685	0.0415189	1	0.187469	1.98704e-06	0.00593726	-200.028	NA
ENSMUSG00000013921	Clip3	156.496	156.295	154.41	147.835	144.362	144.431	130.514	131.973	133.9	151.971	151.31	148.945	Clip3	-0.0976431	-0.237193	-0.0470268	1.86791e-05	0.0518533	7.47378e-25	9.02235e-21	0.0506118	0.0259529	1	0.190162	1.18451e-16	5.76147e-13	-0.801718	NA
ENSMUSG00000013973	Dedd	4.03132	4.34329	3.8863	4.8378	4.72351	4.27219	3.91523	4.36902	4.03433	4.3584	4.40216	4.29896	Dedd	0.172768	0.00718132	0.0925204	0.0303563	1	0.961529	1	-0.0810822	0.289718	1	0.0845073	0.288716	1	11.7677	NA
ENSMUSG00000013997	Nit1	24.6432	25.1994	24.4856	43.4584	42.1849	45.6342	23.3301	23.5038	24.7342	42.3547	42.6541	42.2018	Nit1	0.822612	-0.0547569	0.775333	9.5903e-121	9.23354e-117	0.161586	1	-0.0466403	0.158908	1	0.83073	3.28418e-122	3.16168e-118	-15.1712	NA
ENSMUSG00000014039	Prdm15	13.3791	14.2137	12.8902	19.2544	17.6631	18.5407	15.3299	13.8205	13.7032	18.122	18.5589	19.0138	Prdm15	0.455786	0.0822533	0.46112	5.9717e-19	3.09871e-15	0.126125	1	0.00546158	0.91153	1	0.378995	6.35462e-14	2.83734e-10	4.60766	NA
ENSMUSG00000014074	Rnf168	50.0872	51.515	52.2281	39.2776	39.0402	36.7784	55.2476	53.7619	53.4214	38.2595	38.1324	38.3271	Rnf168	-0.41983	0.078512	-0.423022	6.3124e-41	4.47802e-37	0.00931755	1	-0.00370994	0.900394	1	-0.502052	1.60194e-59	1.27627e-55	-6.39459	NA
ENSMUSG00000014075	Tctex1d2	14.5955	13.6312	15.3322	15.7784	14.9824	15.5486	15.4638	15.8399	15.7884	15.4432	14.0676	14.0988	Tctex1d2	0.0892065	0.112733	0.00197384	0.0781992	1	0.025765	1	-0.0878697	0.079168	1	-0.111396	0.0257488	1	-0.988143	NA
ENSMUSG00000014077	Chp1	182.973	182.977	184.794	215.753	211.534	217.968	164.456	163.952	161.108	213.677	213.369	210.262	Chp1	0.22873	-0.170041	0.210585	1.00041e-24	5.82137e-21	6.8501e-14	7.80089e-10	-0.018107	0.413688	1	0.380664	7.95524e-65	6.49784e-61	-2.23866	NA
ENSMUSG00000014177	Tvp23b	34.191	33.4886	34.6855	46.3898	45.742	45.98	34.9456	34.1967	34.1509	47.2813	48.5717	48.3832	Tvp23b	0.432546	0.0130107	0.494758	8.26032e-50	6.22167e-46	0.678832	1	0.0626075	0.0216733	1	0.482143	2.00543e-63	1.62821e-59	37.0575	NA
ENSMUSG00000014195	Dnajc7	115.355	116.613	115.239	110.063	112.674	111.293	130.698	129.722	133.581	117.208	113.878	115.414	Dnajc7	-0.055978	0.182412	-0.00302231	0.0197851	1	1.42801e-14	1.63779e-10	0.0530003	0.0261995	1	-0.185389	3.37721e-15	1.57378e-11	-1.01633	NA
ENSMUSG00000014226	Cacybp	147.748	151.018	148.712	71.4748	71.4494	69.1043	168.925	176.499	174.796	80.12	78.6148	80.6474	Cacybp	-1.07831	0.21736	-0.902527	0	0	1.69235e-18	1.99748e-14	0.175551	1.9835e-10	2.43693e-06	-1.12012	0	0	-5.15328	NA
ENSMUSG00000014232	Cluap1	5.66427	4.82599	5.29835	5.06206	4.48293	5.56523	5.7563	5.49459	6.45576	5.0512	5.16083	4.79649	Cluap1	-0.0596362	0.166002	-0.0706834	0.488114	1	0.0535635	1	-0.013993	0.903988	1	-0.239635	0.00495937	1	-1.44356	NA
ENSMUSG00000014243	Zswim7	6.48074	6.9399	6.1788	3.49224	3.53781	3.32497	6.24167	6.43809	6.42213	4.32761	3.82557	3.83158	Zswim7	-0.928178	-0.0372018	-0.710405	2.71474e-34	1.8015e-30	0.592898	1	0.213739	0.0109956	1	-0.677249	2.49889e-20	1.33066e-16	18.2047	NA
ENSMUSG00000014245	Pigl	3.93134	4.26006	3.53745	5.04604	5.54835	5.0841	4.09934	4.25315	3.98389	5.14358	4.93323	5.59555	Pigl	0.419506	0.0736823	0.420327	2.88419e-07	0.000948611	0.412754	1	0.00178819	1	1	0.347615	1.63761e-05	0.0441827	4.71775	NA
ENSMUSG00000014294	Ndufa2	88.6449	93.4769	86.8316	66.2527	64.6101	65.586	87.165	98.0731	95.4265	70.3438	71.6047	66.3547	Ndufa2	-0.453272	0.0615491	-0.36873	6.35568e-30	4.00281e-26	0.118002	1	0.0844204	0.0357229	1	-0.430401	1.70319e-27	1.03282e-23	-6.99281	NA
ENSMUSG00000014301	Pam16	12.4793	13.4647	12.6244	15.6182	16.34	15.699	13.8737	15.1613	15.1157	17.1213	17.2995	16.8729	Pam16	0.305025	0.195519	0.412098	1.25827e-10	5.01797e-07	5.64821e-05	0.496647	0.107149	0.0169096	1	0.216654	1.88484e-06	0.00565075	1.1081	NA
ENSMUSG00000014303	Glis2	33.5911	34.2709	33.2569	28.0326	25.4991	26.7499	43.2806	43.0358	43.3489	32.3168	31.2437	31.9044	Glis2	-0.332218	0.359016	-0.0830363	6.70906e-22	3.7195e-18	1.40598e-28	1.71375e-24	0.249079	4.45416e-13	5.52049e-09	-0.442157	6.056e-43	4.34155e-39	-1.23158	NA
ENSMUSG00000014313	Cox6c	151.097	148.272	148.496	121.789	130.408	127.186	139.066	150.462	148.933	135.282	131.995	129.526	Cox6c	-0.239623	-0.0306009	-0.174819	3.00075e-14	1.37945e-10	0.330095	1	0.0649078	0.0400638	1	-0.144114	4.54871e-06	0.0130821	4.70947	NA
ENSMUSG00000014329	Bicc1	61.5013	59.8042	60.717	36.2661	35.2425	34.7186	56.2685	53.2984	52.6815	35.4421	36.3116	38.5985	Bicc1	-0.777677	-0.166004	-0.722842	1.6115e-111	1.51996e-107	7.08648e-07	0.00693342	0.0553923	0.129658	1	-0.556282	1.10034e-57	8.69046e-54	3.35101	NA
ENSMUSG00000014349	Ube2z	247.575	250.222	246.758	362.643	350.038	352.985	242.434	245.821	247.22	366.847	367.211	367.014	Ube2z	0.517401	-0.0177041	0.564485	3.25629e-120	3.13027e-116	0.433115	1	0.0471163	0.0305599	1	0.582221	2.87082e-152	2.90183e-148	-32.8862	NA
ENSMUSG00000014353	Tmem87b	40.7727	40.4628	40.1178	85.7953	82.2066	85.6731	41.1048	38.4839	40.8266	80.936	81.7102	82.6224	Tmem87b	1.06481	-0.0113366	1.01513	7.51663e-284	8.41262e-280	0.734437	1	-0.0490722	0.0752213	1	1.02707	8.11368e-264	8.99402e-260	-90.5982	NA
ENSMUSG00000014355	Anapc1	309.76	308.579	315.367	344.734	334.005	330.808	332.345	308.291	309.269	321.446	321.069	332.293	Anapc1	0.112659	0.0248073	0.0620293	0.000115206	0.292279	0.397088	1	-0.0504949	0.0830821	1	0.0373563	0.201033	1	1.50586	NA
ENSMUSG00000014361	Mertk	15.0954	13.8642	14.1029	7.73715	7.4386	7.64009	13.3382	14.3502	13.1315	7.29896	7.64925	7.81183	Mertk	-0.918407	-0.077058	-0.919526	3.04437e-62	2.45681e-58	0.131678	1	-0.00394217	0.964126	1	-0.845295	8.21444e-53	6.31855e-49	10.9696	NA
ENSMUSG00000014402	Tsg101	54.4862	54.8607	57.2284	50.6507	50.9659	50.9567	56.3857	59.7539	59.3068	54.4556	53.7306	51.0669	Tsg101	-0.126765	0.0749128	-0.0650612	9.35132e-05	0.23936	0.01979	1	0.0617438	0.0560606	1	-0.139934	1.2192e-05	0.0335037	-1.86796	NA
ENSMUSG00000014418	Hps5	29.9253	32.1903	31.9279	48.328	45.9825	47.7542	29.9412	29.1317	28.3832	45.1721	46.4474	46.5288	Hps5	0.596156	-0.104864	0.555449	1.28521e-68	1.06801e-64	0.0042328	1	-0.040843	0.209019	1	0.660178	1.34197e-82	1.17167e-78	-6.29556	NA
ENSMUSG00000014426	Map3k4	50.4372	49.9504	47.693	52.4448	50.3817	50.9417	53.8751	49.6237	49.7556	55.1484	57.5543	57.2785	Map3k4	0.0545652	0.049559	0.199158	0.121752	1	0.160946	1	0.144629	2.67686e-05	0.311078	0.149635	1.52313e-05	0.0412615	3.01933	NA
ENSMUSG00000014444	Piezo1	215.615	218.081	214.813	227.095	206.07	211.999	253.029	229.831	232.372	216.509	223.247	229.545	Piezo1	-0.00738442	0.141294	0.0451474	0.842136	1	0.000137563	1	0.0529403	0.152634	1	-0.0957382	0.00961899	1	-0.677582	NA
ENSMUSG00000014470	Rnf166	22.1604	22.5362	21.2462	32.4857	32.7336	31.6965	23.6147	24.7287	24.5156	32.7324	32.1541	33.3367	Rnf166	0.555525	0.144159	0.575135	3.58871e-56	2.80781e-52	0.000117405	1	0.0200394	0.549936	1	0.431406	3.09396e-36	2.08564e-32	2.99257	NA
ENSMUSG00000014496	Ankrd28	170.226	169.095	173.897	51.3395	50.7597	48.7465	144.188	130.781	132.992	46.2805	47.2364	50.3734	Ankrd28	-1.76748	-0.331227	-1.83544	0	0	2.37989e-21	2.84493e-17	-0.0676641	0.0809647	1	-1.50391	0	0	4.54043	NA
ENSMUSG00000014498	Ankrd52	77.1976	72.8705	75.6847	140.803	133.054	129.772	71.1142	63.2465	65.2932	129.109	131.737	135.391	Ankrd52	0.838463	-0.177366	0.811755	1.56687e-106	1.46111e-102	6.86333e-06	0.0640486	-0.0265679	0.475819	1	0.989261	6.97655e-146	6.99399e-142	-5.57752	NA
ENSMUSG00000014503	Pkd2l2	12.9459	12.2163	11.2622	16.7075	15.6698	15.6539	11.0619	11.139	11.1977	14.7658	15.2056	13.933	Pkd2l2	0.400019	-0.125383	0.270856	2.92239e-14	1.34401e-10	0.0257604	1	-0.130003	0.0104174	1	0.395402	1.74775e-13	7.69011e-10	-3.15356	NA
ENSMUSG00000014504	Srp19	56.669	58.9054	57.5607	52.7171	53.2858	53.3172	60.5197	66.706	63.6789	55.5795	54.2313	52.2127	Srp19	-0.120036	0.141103	-0.0959882	0.000507592	1	3.53696e-05	0.315532	0.0241844	0.483939	1	-0.236954	3.36448e-12	1.41443e-08	-1.67931	NA
ENSMUSG00000014547	Wdfy2	53.9863	56.3421	57.0125	33.2226	33.1976	31.3507	50.6951	44.7407	48.7972	33.3791	31.8658	33.7438	Wdfy2	-0.776532	-0.21464	-0.757503	4.06322e-78	3.50168e-74	1.13422e-07	0.0011425	0.0185238	0.676134	1	-0.543369	9.45298e-39	6.52823e-35	2.53154	NA
ENSMUSG00000014550	Rbsn	72.7653	75.517	73.143	93.7084	93.1873	94.8747	81.2234	80.9246	79.5695	93.2524	91.1328	93.0857	Rbsn	0.348053	0.126574	0.325633	3.33986e-43	2.41171e-39	9.33337e-07	0.0090767	-0.0224316	0.363078	1	0.199047	1.46266e-15	6.89203e-12	1.57257	NA
ENSMUSG00000014551	Mrps25	29.2754	29.294	27.9409	29.0257	28.5922	31.0801	31.9832	33.965	32.4693	32.9634	32.6852	32.1607	Mrps25	0.037508	0.186353	0.177374	0.336061	1	7.65704e-07	0.00747634	0.139726	0.000145772	1	-0.00911936	0.810033	1	-0.0489359	NA
ENSMUSG00000014554	Dguok	22.5603	24.9331	23.439	29.8106	29.9326	29.3661	23.3636	26.8971	25.5077	29.9458	30.0299	29.2961	Dguok	0.32926	0.0954063	0.332902	1.77464e-13	7.96102e-10	0.0375468	1	0.00283777	0.954287	1	0.236691	8.49329e-08	0.00028495	2.48088	NA
ENSMUSG00000014592	Camta1	10.7298	10.0026	10.0329	15.2658	15.1371	14.0451	9.55559	10.2286	10.6765	13.996	14.9628	15.4256	Camta1	0.530895	-0.0144139	0.528333	1.42277e-21	7.82665e-18	0.818831	1	-0.00053504	0.987805	1	0.544776	8.91684e-23	4.99254e-19	-37.7952	NA
ENSMUSG00000014599	Csf1	996.383	993.402	983.332	722.274	712.726	715.26	1085.69	1089.31	1098.64	677.807	675.093	675.197	Csf1	-0.467471	0.138922	-0.551829	2.58184e-114	2.4494e-110	1.03828e-11	1.15021e-07	-0.0843998	4.34672e-05	0.501699	-0.690794	6.08945e-247	6.69109e-243	-4.97251	NA
ENSMUSG00000014601	Strip1	90.0946	88.8995	87.4961	94.3972	91.2627	91.5219	81.759	83.9372	85.2363	83.3377	86.0042	85.2006	Strip1	0.0568234	-0.0868151	-0.0661985	0.0317181	1	0.00118101	1	-0.122966	2.96477e-06	0.0351385	0.020673	0.440374	1	-0.238127	NA
ENSMUSG00000014606	Slc25a11	76.1812	76.7155	76.0004	71.4908	72.996	74.1561	65.3232	71.3076	67.5296	72.9611	73.031	70.7571	Slc25a11	-0.0659903	-0.164966	-0.0788156	0.0293633	1	6.78328e-08	0.000688503	-0.0127554	0.677611	1	0.0862205	0.00468626	1	-0.522656	NA
ENSMUSG00000014633	Cmc2	18.6946	18.9908	18.2726	9.9477	9.53506	10.0157	16.8864	17.9918	17.3018	11.1786	10.6839	11.1739	Cmc2	-0.924459	-0.100854	-0.760426	1.58094e-92	1.42095e-88	0.015216	1	0.162519	0.00120268	1	-0.66109	2.47793e-49	1.86415e-45	6.55491	NA
ENSMUSG00000014668	Chfr	23.1769	24.3671	24.8677	50.5866	49.1444	48.3706	20.1166	19.8457	18.5797	47.466	48.0558	48.6546	Chfr	1.03297	-0.307071	0.994096	1.4128e-200	1.50138e-196	1.39366e-14	1.59881e-10	-0.0385074	0.216469	1	1.30154	6.27175e-302	7.07266e-298	-4.23857	NA
ENSMUSG00000014704	Hoxa2	6.63071	6.37397	6.27848	2.37095	1.56163	2.03194	5.08682	4.63386	4.92555	1.81813	1.9896	2.38421	Hoxa2	-1.70214	-0.399114	-1.64777	5.40348e-63	4.37844e-59	6.72296e-06	0.0627857	0.0498003	0.684169	1	-1.25325	2.02595e-33	1.32659e-29	3.14008	NA
ENSMUSG00000014748	Tex261	124.687	124.087	123.445	150.734	149.671	151.197	126.547	134.555	131.126	146.09	145.908	142.492	Tex261	0.279046	0.0756025	0.223092	2.24385e-28	1.38491e-24	0.0031167	1	-0.0558453	0.024942	1	0.147598	4.39144e-09	1.60639e-05	1.95229	NA
ENSMUSG00000014763	Fam120b	38.6233	38.9315	37.7422	65.4198	61.9294	62.5639	36.4519	36.9279	35.2943	62.6153	63.138	63.0378	Fam120b	0.720612	-0.085307	0.711552	9.95838e-128	9.70245e-124	0.00896383	1	-0.00870486	0.761271	1	0.797215	4.53179e-155	4.59433e-151	-9.34525	NA
ENSMUSG00000014767	Tbp	36.1405	35.1364	35.2836	42.4332	43.2675	42.6121	35.113	35.6203	35.4289	43.2476	41.5161	40.3775	Tbp	0.267926	-0.00537899	0.231421	1.35192e-17	6.79613e-14	0.873597	1	-0.0360479	0.235432	1	0.237257	3.49325e-14	1.57196e-10	-44.1081	NA
ENSMUSG00000014769	Psmb1	195.77	198.706	193.616	187.048	192.511	192.679	178.85	192.82	192.048	198.435	197.953	189.893	Psmb1	-0.0394308	-0.0610616	-0.00465968	0.180077	1	0.0381689	1	0.0349585	0.233213	1	0.0565892	0.0539778	1	-0.926757	NA
ENSMUSG00000014778	Fhod1	59.1018	56.5252	54.2548	35.1288	33.3694	34.9893	48.8708	49.5244	47.2165	33.2867	32.7914	34.1961	Fhod1	-0.714829	-0.222445	-0.759918	5.45576e-91	4.87909e-87	9.90443e-11	1.07919e-06	-0.0462186	0.218835	1	-0.538604	5.64165e-51	4.29217e-47	2.42129	NA
ENSMUSG00000014782	Plekhg4	46.988	46.0222	45.7327	1.84234	1.97405	1.64102	41.0546	40.2384	40.1036	1.51022	1.9896	1.60023	Plekhg4	-4.69705	-0.192816	-4.77604	0	0	1.72407e-10	1.86924e-06	-0.0930304	0.42127	1	-4.59731	0	0	23.843	NA
ENSMUSG00000014786	Slc9a5	34.8075	33.0392	34.7852	20.7922	17.4741	19.7736	30.6609	32.8725	32.957	18.8148	19.0444	18.6067	Slc9a5	-0.821576	-0.0890828	-0.861661	6.95177e-66	5.71227e-62	0.0538187	1	-0.0415071	0.426868	1	-0.774002	3.54783e-58	2.80988e-54	8.68857	NA
ENSMUSG00000014791	Elmo3	3.66473	2.81195	3.50422	10.172	9.93029	10.1209	2.74364	2.631	2.9077	8.31507	7.98306	8.46013	Elmo3	1.60767	-0.272176	1.31966	3.6813e-113	3.48398e-109	0.00387593	1	-0.289117	7.07098e-07	0.00846255	1.59075	1.23858e-96	1.12648e-92	-5.84457	NA
ENSMUSG00000014813	Stc1	11.4796	12.6491	12.2423	0.785117	0.736796	0.6938	10.4092	10.0465	9.95339	0.802026	0.73022	1.04239	Stc1	-4.09545	-0.259017	-3.83592	0	0	5.24928e-06	0.0492855	0.228122	0.209019	1	-3.60842	0	0	13.9312	NA
ENSMUSG00000014837	4931428F04Rik	3.13153	2.4957	2.67361	1.13752	1.04611	1.14486	2.45911	2.58134	2.72273	1.00217	1.07921	1.359	4931428F04Rik	-1.33979	-0.0977331	-1.27649	1.06108e-24	6.17124e-21	0.398196	1	0.0477478	0.788107	1	-1.19435	4.8077e-20	2.54279e-16	12.2205	NA
ENSMUSG00000014846	Tppp3	4.38123	4.06032	4.71692	1.24965	1.04611	1.15989	4.35039	4.83249	4.69014	1.27929	1.09438	1.23838	Tppp3	-1.95434	0.0769042	-1.86562	1.33414e-69	1.11334e-65	0.379554	1	0.0621842	0.682016	1	-1.96912	1.84386e-75	1.56912e-71	-25.6048	NA
ENSMUSG00000014850	Msh3	15.562	16.2278	16.9934	11.053	10.8926	10.0006	18.8111	17.909	18.2939	10.3781	10.3046	10.0884	Msh3	-0.614139	0.173604	-0.663981	7.42144e-35	4.96049e-31	0.000161598	1	-0.052382	0.324594	1	-0.840128	1.94774e-67	1.60806e-63	-4.83934	NA
ENSMUSG00000014856	Tmem208	21.5106	21.2046	20.698	27.6001	27.8877	27.9076	23.4138	25.3577	26.5839	30.0228	29.5595	28.2408	Tmem208	0.395702	0.24923	0.469516	1.67695e-20	9.01193e-17	9.71025e-09	0.000100967	0.0745768	0.0663563	1	0.221048	8.3893e-08	0.000281713	0.886924	NA
ENSMUSG00000014859	E2f4	62.0511	60.5532	64.9366	61.8316	60.8296	58.8653	71.0138	75.5616	74.1886	60.0134	58.935	60.3089	E2f4	-0.0474164	0.235429	-0.0646369	0.144614	1	1.49511e-13	1.6971e-09	-0.017804	0.578771	1	-0.30065	2.71968e-21	1.48223e-17	-1.27703	NA
ENSMUSG00000014867	Surf4	345.802	346.164	343.226	393.591	388.668	394.618	343.023	346.957	341.925	402.057	402.944	390.926	Surf4	0.185142	-0.00457764	0.208106	1.41962e-17	7.1279e-14	0.834421	1	0.0230938	0.282999	1	0.212814	8.4408e-23	4.72938e-19	-46.4899	NA
ENSMUSG00000014873	Surf2	27.0426	27.6795	27.3097	28.5932	26.891	26.9905	29.5396	29.9593	30.1992	26.4357	26.98	24.4414	Surf2	0.00787258	0.129022	-0.0765856	0.846422	1	0.000874402	1	-0.0834823	0.0319565	1	-0.204632	1.10622e-07	0.00036793	-1.58603	NA
ENSMUSG00000014905	Dnajb9	8.94684	9.0538	8.45469	14.529	15.1543	15.0074	10.4259	9.7486	10.9791	16.0436	14.7655	17.1443	Dnajb9	0.758292	0.236353	0.856032	1.05688e-36	7.19315e-33	0.000210396	1	0.102124	0.0651948	1	0.624064	4.07718e-27	2.45487e-23	2.64039	NA
ENSMUSG00000014907	Naf1	50.4538	51.8812	50.8825	33.7832	33.6959	33.0347	59.8502	59.4063	61.1734	33.3791	33.4439	33.8644	Naf1	-0.60907	0.235925	-0.605631	2.34871e-98	2.14578e-94	9.33207e-19	1.10305e-14	0.00296771	0.935014	1	-0.842028	4.96861e-201	5.29108e-197	-3.56906	NA
ENSMUSG00000014932	Yes1	52.8366	53.063	55.8828	68.4953	69.8341	68.9389	56.8208	52.8184	55.2543	67.7574	67.6597	70.3952	Yes1	0.357456	0.0273879	0.347501	9.51685e-30	5.98039e-26	0.399239	1	-0.0099719	0.744996	1	0.320096	2.14545e-24	1.2332e-20	11.6875	NA
ENSMUSG00000014956	Ppp1cb	262.388	264.787	270.73	250.145	256.866	253.918	264.644	260.801	261.362	265.375	260.042	268.036	Ppp1cb	-0.0685328	-0.0202154	-0.00806063	0.0030168	1	0.382063	1	0.0604594	0.0086645	1	0.012142	0.598743	1	-0.600632	NA
ENSMUSG00000014959	Gorasp2	139.666	145.609	141.154	121.869	119.273	124.088	152.004	157.331	154.432	126.03	127.018	126.782	Gorasp2	-0.223196	0.121143	-0.166736	1.36924e-18	7.03652e-15	1.34646e-06	0.0130041	0.0562135	0.0267348	1	-0.288126	1.65895e-30	1.04763e-26	-2.3784	NA
ENSMUSG00000014980	Tsen15	22.627	22.0202	21.595	20.4238	20.6704	20.5554	22.259	25.6556	24.4147	19.7386	20.7742	20.2803	Tsen15	-0.103888	0.127162	-0.123896	0.0244856	1	0.00516527	1	-0.0200268	0.667508	1	-0.251077	3.07343e-08	0.000106525	-1.97447	NA
ENSMUSG00000015002	Efr3a	180.907	179.897	183.582	219.902	223.323	225.667	209.73	200.384	201.431	220.004	221.274	228.505	Efr3a	0.297233	0.167844	0.298916	7.68539e-32	4.94017e-28	4.23862e-11	4.64977e-07	0.00190028	0.940101	1	0.13129	1.74711e-07	0.000573401	0.782215	NA
ENSMUSG00000015013	Trappc2l	14.5622	15.4288	14.8006	29.3781	29.881	29.4863	13.1875	14.6482	14.5272	30.1614	30.9403	30.261	Trappc2l	0.987622	-0.0804937	1.02871	9.09226e-141	9.05952e-137	0.0788019	1	0.0422706	0.226602	1	1.11039	7.87851e-179	8.21729e-175	-13.7947	NA
ENSMUSG00000015016	Acsf3	9.58002	10.3688	9.4182	16.1148	15.5151	15.714	9.32128	9.94723	9.83568	14.5195	15.9946	13.3902	Acsf3	0.690889	-0.0129351	0.577628	2.63932e-30	1.67122e-26	0.851383	1	-0.109323	0.0566622	1	0.594504	1.28414e-22	7.17961e-19	-45.9604	NA
ENSMUSG00000015023	Ddx19a	65.7669	66.9948	64.405	56.8339	56.7914	56.625	63.0805	62.1044	62.3	52.2078	52.2891	54.5948	Ddx19a	-0.211902	-0.0726799	-0.30968	1.03027e-14	4.80416e-11	0.00762424	1	-0.0977022	0.000447745	1	-0.236924	9.41972e-18	4.70704e-14	3.25983	NA
ENSMUSG00000015027	Galns	15.3287	14.3802	13.8537	22.7465	22.2169	21.7582	14.6604	15.3434	15.9397	24.2649	24.7192	24.0947	Galns	0.615773	0.07692	0.747544	9.34777e-46	6.86968e-42	0.101865	1	0.131854	0.000883946	1	0.670708	2.97095e-57	2.342e-53	8.71955	NA
ENSMUSG00000015053	Gata2	22.2604	22.403	23.223	16.8677	16.993	17.4882	18.6103	20.1933	19.3364	17.1213	16.4953	17.1142	Gata2	-0.402777	-0.223777	-0.420231	3.4823e-23	1.97446e-19	2.46653e-08	0.000253831	-0.0181965	0.6797	1	-0.197197	2.1713e-06	0.00645745	0.881222	NA
ENSMUSG00000015083	C8g	4.54786	4.1269	4.5508	3.30002	3.02228	2.72356	3.56375	3.42552	3.79892	3.43467	3.30968	3.27374	C8g	-0.555263	-0.296451	-0.399521	2.72463e-10	1.06533e-06	0.000495525	1	0.151128	0.102643	1	-0.107686	0.234474	1	0.36325	NA
ENSMUSG00000015087	Rabl6	154.163	152.933	149.36	161.114	153.229	154.324	152.607	153.458	158.972	160.3	159.746	159.74	Rabl6	0.0381636	0.0268556	0.0720448	0.143318	1	0.303966	1	0.0337685	0.191251	1	0.0450765	0.0821118	1	1.67847	NA
ENSMUSG00000015090	Ptgds	0.0489106	0.0655377	0.0322478	0.849191	1.06329	1.00954	0.0489848	0.0653529	0.0658788	0.771235	0.927473	0.997157	Ptgds	5.65717	0.676171	4.2508	8.66458e-45	6.33035e-41	0.727118	1	-0.117291	0.488489	1	4.86486	7.99064e-39	5.52313e-35	7.19473	NA
ENSMUSG00000015092	Edf1	128.969	128.598	123.744	136.478	137.969	129.591	120.354	132.006	133.463	150.154	148.7	142.552	Edf1	0.083294	0.0169899	0.211033	0.0203041	1	0.638514	1	0.127873	0.000341262	1	0.194177	5.64515e-08	0.000192048	11.4289	NA
ENSMUSG00000015094	Npdc1	77.7975	79.2122	77.8277	119.835	117.193	120.134	69.792	74.7836	74.8948	121.426	123.953	119.756	Npdc1	0.605311	-0.0976501	0.636676	6.87883e-102	6.34779e-98	0.000920526	1	0.0316504	0.244412	1	0.734612	6.03934e-149	6.08161e-145	-7.5229	NA
ENSMUSG00000015095	Fbxw5	69.616	75.3506	70.5847	73.3649	70.3324	70.9987	65.34	69.0399	68.0005	68.0191	67.69	66.1285	Fbxw5	-0.00563173	-0.0909675	-0.0940795	0.862617	1	0.00512091	1	-0.0892849	0.00558914	1	-0.00394905	0.90666	1	0.0434117	NA
ENSMUSG00000015112	Slc25a13	32.4414	34.8701	32.7087	52.3967	50.9488	52.9414	30.1421	29.86	31.4268	54.3016	52.3043	53.1475	Slc25a13	0.644918	-0.129793	0.676143	2.52843e-84	2.21844e-80	0.000297977	1	0.0310694	0.315513	1	0.805782	6.0648e-130	5.93077e-126	-6.20821	NA
ENSMUSG00000015120	Ube2i	192.054	193.23	183.349	148.043	143.554	143.424	189.897	191.396	200.12	143.427	145.317	146.638	Ube2i	-0.386475	0.0320532	-0.384884	2.69124e-44	1.95922e-40	0.24205	1	0.00121353	0.967054	1	-0.417315	1.08889e-51	8.31694e-48	-13.0194	NA
ENSMUSG00000015126	Tsr3	20.4775	20.8717	19.5351	20.8883	19.7252	19.6382	19.5308	21.0043	20.3285	20.262	20.1521	18.9987	Tsr3	-0.0151116	-0.000354404	-0.0353487	0.735701	1	0.999538	1	-0.02038	0.643932	1	-0.0351372	0.424542	1	99.1445	NA
ENSMUSG00000015127	Unkl	10.2299	10.8847	10.3153	18.5336	17.2851	16.8868	9.77317	8.95408	8.97809	15.7203	17.9368	16.7071	Unkl	0.747219	-0.182593	0.678711	2.60039e-39	1.81715e-35	0.00376811	1	-0.0651985	0.222934	1	0.864618	2.09839e-50	1.59121e-46	-4.73522	NA
ENSMUSG00000015133	Lrrk1	84.4626	79.5784	81.6485	66.1086	62.6511	65.2552	83.8343	79.2528	80.7466	65.8175	68.0845	69.8223	Lrrk1	-0.340376	-0.0109701	-0.27021	6.00141e-26	3.56424e-22	0.733466	1	0.0701447	0.0311271	1	-0.259262	6.76816e-16	3.21961e-12	23.6335	NA
ENSMUSG00000015143	Actn1	346.302	354.669	345.734	309.574	305.463	301.324	356.731	367.681	368.779	307.543	309.735	306.135	Actn1	-0.19194	0.062699	-0.180726	9.42281e-17	4.62566e-13	0.00638778	1	0.011115	0.632134	1	-0.243524	3.64114e-26	2.15738e-22	-3.88402	NA
ENSMUSG00000015149	Sirt2	58.5186	59.721	58.5076	98.0334	91.7954	96.8895	58.4276	57.9662	60.9884	92.9137	89.9341	89.9045	Sirt2	0.698716	0.00510978	0.625799	3.99176e-117	3.81093e-113	0.874812	1	-0.0726015	0.0132389	1	0.621005	6.8712e-93	6.18614e-89	121.533	NA
ENSMUSG00000015165	Hnrnpl	319.025	315.004	315.65	232.541	229.028	226.975	313.165	317.494	318.972	229.642	236.888	230.359	Hnrnpl	-0.463992	-7.28001e-05	-0.44663	8.06984e-95	7.29433e-91	0.998279	1	0.0174412	0.442995	1	-0.446478	1.92298e-88	1.71184e-84	6132.93	NA
ENSMUSG00000015176	Nolc1	203.335	202.951	205.942	89.9441	87.2244	85.4777	233.128	229.6	233.061	91.5281	89.2816	87.3113	Nolc1	-1.22144	0.184595	-1.19142	0	0	1.42556e-14	1.63512e-10	0.0299005	0.265695	1	-1.37614	0	0	-7.45488	NA
ENSMUSG00000015189	Casd1	48.321	51.0656	50.6666	53.5821	52.5812	55.8281	48.3687	48.5313	47.4519	51.3611	53.9127	55.3185	Casd1	0.111209	-0.0558991	0.0976754	0.00101167	1	0.103047	1	-0.0130956	0.702536	1	0.154013	4.96987e-06	0.0142387	-2.75519	NA
ENSMUSG00000015202	Cnksr3	25.8929	26.2647	26.8113	24.9731	23.6948	23.9985	22.7778	22.312	22.1782	22.402	21.8059	23.7328	Cnksr3	-0.119877	-0.231667	-0.217762	0.00162452	1	2.21612e-09	2.34333e-05	-0.097273	0.0115222	1	0.0145179	0.718288	1	-0.0626673	NA
ENSMUSG00000015214	Mtmr1	12.8959	13.9641	13.8537	63.2252	63.7509	62.3234	15.129	13.2081	14.0732	61.7069	62.2732	64.5153	Mtmr1	2.21932	0.0587496	2.21159	0	0	0.224322	1	-0.00581218	0.851086	1	2.15476	0	0	36.677	NA
ENSMUSG00000015217	Hmgb3	2.74828	3.09492	2.92279	1.44188	0.977374	1.00954	2.87754	2.64755	3.1263	0.925191	1.20059	1.14792	Hmgb3	-1.37691	-0.0196147	-1.42839	1.64779e-25	9.72689e-22	0.880733	1	-0.0685823	0.689658	1	-1.42592	3.5374e-27	2.13341e-23	72.6966	NA
ENSMUSG00000015222	Map2	23.7101	21.8038	23.8875	18.1652	17.6288	18.3452	24.6524	22.1299	23.5571	17.2137	16.298	17.7021	Map2	-0.358181	0.0192451	-0.438053	9.77128e-14	4.42443e-10	0.685917	1	-0.0808997	0.104902	1	-0.458326	1.47741e-21	8.08884e-18	-23.8152	NA
ENSMUSG00000015243	Abca1	9.0968	8.904	8.32179	1.60206	1.78503	1.67109	6.71031	5.36217	6.3885	1.61799	1.67097	1.60023	Abca1	-2.40254	-0.514346	-2.42785	9.75956e-135	9.63464e-131	5.32351e-11	5.82711e-07	-0.0480924	0.744574	1	-1.93631	6.44973e-81	5.60352e-77	3.76461	NA
ENSMUSG00000015247	Nipsnap3b	8.29699	8.67097	8.7371	7.94539	7.97131	8.31668	9.55559	9.64929	8.96127	7.94557	7.98306	7.58568	Nipsnap3b	-0.0842309	0.132537	-0.128521	0.138011	1	0.0172003	1	-0.0449553	0.443297	1	-0.261725	2.30753e-06	0.00684875	-1.97473	NA
ENSMUSG00000015289	Lage3	31.9248	32.7895	32.094	21.3689	20.3782	19.9239	30.4099	34.9416	34.4199	22.3712	21.7149	21.8332	Lage3	-0.651605	0.0436034	-0.554455	5.94103e-45	4.34824e-41	0.329358	1	0.0964781	0.0448153	1	-0.598732	2.39623e-39	1.66202e-35	-13.7313	NA
ENSMUSG00000015290	Ubl4a	40.4228	40.8789	39.9682	51.9802	52.0142	53.2571	41.0044	41.9102	44.7783	56.5956	55.3086	56.8413	Ubl4a	0.375433	0.0744152	0.476584	1.75784e-31	1.12484e-27	0.0250116	1	0.101498	0.000928737	1	0.402516	2.64611e-37	1.80438e-33	5.40905	NA
ENSMUSG00000015291	Gdi1	158.662	153.648	156.055	449.079	449.723	457.15	126.715	131.244	130.436	457.835	454.625	447.825	Gdi1	1.53383	-0.270148	1.53827	0	0	2.17438e-27	2.6434e-23	0.00454398	0.839403	1	1.80853	0	0	-6.69457	NA
ENSMUSG00000015305	Sash1	77.031	74.9511	78.1932	42.4973	39.401	41.259	68.3861	61.7899	63.3426	39.0908	39.2856	42.4279	Sash1	-0.902244	-0.250415	-0.930862	4.57983e-114	4.34351e-110	1.04731e-10	1.14052e-06	-0.0282198	0.500005	1	-0.680049	1.38614e-64	1.13082e-60	2.71569	NA
ENSMUSG00000015312	Gadd45b	20.5775	20.9882	19.5517	94.4773	90.4206	88.2291	14.0411	16.2703	15.8724	58.9203	59.0261	56.796	Gadd45b	2.16147	-0.404721	1.51599	0	0	2.68751e-17	3.14976e-13	-0.644518	1.94267e-72	2.44951e-68	1.92167	0	0	-4.74814	NA
ENSMUSG00000015335	Zdhhc12	13.8124	13.5479	14.568	22.1538	21.1171	21.9988	12.3172	12.397	13.4342	23.726	22.0184	21.5467	Zdhhc12	0.640243	-0.136807	0.681936	3.42205e-40	2.41117e-36	0.00967148	1	0.0431459	0.334892	1	0.820199	1.24574e-64	1.01652e-60	-5.99528	NA
ENSMUSG00000015337	Endog	1.5319	1.73003	1.46091	2.37095	2.69578	2.04697	1.321	1.60474	1.27659	2.55712	2.36894	2.27868	Endog	0.594195	-0.171111	0.611325	2.58444e-06	0.0078412	0.226856	1	0.0244075	0.867929	1	0.78974	9.6335e-10	3.63954e-06	-4.61536	NA
ENSMUSG00000015341	Golga7	63.8507	63.4661	67.1294	69.8889	71.6384	71.2393	60.9716	63.9582	62.6699	69.9589	70.0267	70.3048	Golga7	0.129858	-0.0517036	0.113468	4.91774e-06	0.0145516	0.0743134	1	-0.016804	0.548878	1	0.164758	6.83435e-09	2.46788e-05	-3.18659	NA
ENSMUSG00000015354	Pcolce2	48.2877	46.9377	46.8956	5.20622	5.15311	5.17431	44.2848	45.9822	45.8713	5.88257	6.28365	5.59555	Pcolce2	-3.20104	-0.0620513	-3.00177	0	0	0.0432699	1	0.194208	0.00353184	1	-2.94479	0	0	47.4573	NA
ENSMUSG00000015357	Clpx	39.6397	38.7484	39.5862	52.5249	56.0353	56.5949	40.4019	39.6425	39.0442	53.5473	53.0326	51.3533	Clpx	0.485764	0.0135876	0.420691	1.25081e-49	9.41111e-46	0.696169	1	-0.0647206	0.0404928	1	0.407456	1.71933e-35	1.15075e-31	29.9873	NA
ENSMUSG00000015363	Trabd	49.9373	50.7494	49.62	55.0077	52.7359	51.3326	53.4902	52.3383	53.9091	51.6536	52.7898	50.5543	Trabd	0.0815036	0.0877949	0.044178	0.00794247	1	0.00446766	1	-0.0371644	0.219587	1	-0.0434557	0.154318	1	-0.494969	NA
ENSMUSG00000015377	Dennd6b	6.814	6.25745	6.69379	8.85844	8.89925	8.54221	6.69357	7.34848	7.93553	8.97708	8.58999	8.50536	Dennd6b	0.412839	0.15361	0.400125	1.16821e-10	4.66467e-07	0.0222373	1	-0.0118748	0.84981	1	0.247355	7.86866e-05	0.194356	1.61028	NA
ENSMUSG00000015452	Ager	1.98179	2.06293	2.07556	1.52197	1.35542	1.31025	1.27078	1.57164	1.57927	1.31008	1.00334	1.07254	Ager	-0.558393	-0.477194	-0.863169	1.24522e-05	0.035302	0.000168861	1	-0.314478	0.0299261	1	-0.395658	0.00575874	1	0.829135	NA
ENSMUSG00000015461	Atf6b	92.6607	92.6779	91.0013	104.857	101.092	99.1598	91.3493	93.4053	94.5353	98.3022	96.7621	98.0761	Atf6b	0.142755	0.0153232	0.0851656	6.56689e-08	0.000226426	0.56836	1	-0.0575853	0.0273469	1	0.069847	0.00818041	1	4.55825	NA
ENSMUSG00000015468	Notch4	1.04868	1.04759	1.29478	1.8103	1.85376	1.95676	1.01973	0.727455	1.00755	2.03367	1.70131	2.02237	Notch4	0.745917	-0.310368	0.766143	8.23055e-08	0.000281814	0.0588161	1	0.0335938	0.816463	1	1.08994	3.08022e-14	1.3898e-10	-3.51175	NA
ENSMUSG00000015474	Ppt2	14.5455	14.297	14.3521	28.8175	28.3173	29.4863	13.8737	14.4164	13.7705	30.1922	28.7553	28.4971	Ppt2	1.00621	-0.0383028	1.01709	5.3225e-145	5.32942e-141	0.407686	1	0.012651	0.710099	1	1.05717	2.05252e-161	2.10096e-157	-27.6003	NA
ENSMUSG00000015478	Rnf5	15.7453	14.1971	15.4485	21.465	22.5091	21.1869	13.2377	14.3833	13.1315	21.6938	19.8486	20.5064	Rnf5	0.521566	-0.155607	0.451473	4.55734e-26	2.71344e-22	0.00339622	1	-0.069958	0.137127	1	0.607218	8.92553e-34	5.87568e-30	-3.90225	NA
ENSMUSG00000015488	Cacfd1	49.7373	48.7187	48.8226	78.6671	76.0204	76.4866	46.9962	47.8526	48.0068	76.9639	78.721	77.2853	Cacfd1	0.650866	-0.0440056	0.661591	1.33348e-131	1.30908e-127	0.126338	1	0.0110862	0.658987	1	0.705959	2.923e-155	2.96421e-151	-16.0425	NA
ENSMUSG00000015501	Hivep2	47.2046	46.6381	48.6067	49.8178	45.089	45.3185	50.3436	42.5392	43.7525	42.1391	43.7465	45.7448	Hivep2	-0.0226654	-0.0602113	-0.11455	0.660806	1	0.243789	1	-0.0912949	0.0756762	1	-0.0537489	0.297301	1	0.892672	NA
ENSMUSG00000015522	Arnt	128.136	130.013	128.844	157.558	155.755	157.301	133.409	126.626	125.207	145.351	146.485	149.774	Arnt	0.282369	-0.00654578	0.190378	1.48252e-27	9.04337e-24	0.805564	1	-0.0918291	0.000340953	1	0.197086	3.38388e-14	1.52444e-10	-30.1089	NA
ENSMUSG00000015536	Mocs2	22.7603	23.5848	24.253	31.1722	31.4104	30.7192	22.6104	23.8845	23.9607	27.9598	27.6021	27.4568	Mocs2	0.402237	-0.00291883	0.234252	2.32735e-30	1.47507e-26	0.944734	1	-0.168249	6.06442e-07	0.00726578	0.236908	2.97037e-11	1.19528e-07	-81.1655	NA
ENSMUSG00000015542	Nat9	13.3125	11.0678	13.0563	14.6091	13.8998	15.0374	13.6562	15.1613	14.729	15.8897	15.3118	14.0385	Nat9	0.21955	0.21867	0.276074	0.000753199	1	0.000809521	1	0.0539868	0.391802	1	0.0548659	0.389932	1	0.250907	NA
ENSMUSG00000015575	Atp6v0e	64.2839	65.5134	62.345	145.624	154.071	152.896	56.302	63.1472	62.2664	157.544	154.815	150.121	Atp6v0e	1.23639	-0.0804827	1.26723	2.73316e-256	3.01441e-252	0.0334169	1	0.0312053	0.368334	1	1.34808	2.54239e-303	2.86857e-299	-16.7499	NA
ENSMUSG00000015597	Zfp318	31.3083	30.8587	30.8979	47.6392	46.1028	46.4912	34.0083	31.8463	31.4436	43.7403	43.3217	45.0362	Zfp318	0.592146	0.0642258	0.505136	2.84448e-72	2.40216e-68	0.0671032	1	-0.0863657	0.00565269	1	0.441555	3.29098e-41	2.32146e-37	6.87504	NA
ENSMUSG00000015605	Srf	60.0683	59.0885	60.7004	69.969	63.7337	64.293	58.9464	61.674	59.3909	70.7133	72.7124	68.9479	Srf	0.138795	0.00128744	0.239501	6.63252e-05	0.173374	0.974348	1	0.101047	0.00307501	1	0.238555	4.49734e-12	1.87764e-08	185.294	NA
ENSMUSG00000015619	Gata3	5.36434	5.39192	5.51431	2.51512	2.12871	2.42286	5.32114	5.75943	6.28761	2.66489	2.26272	2.35406	Gata3	-1.21031	0.0945269	-1.16336	7.03497e-40	4.94066e-36	0.231861	1	0.0397205	0.717168	1	-1.26514	1.56104e-45	1.14237e-41	-13.3839	NA
ENSMUSG00000015647	Lama5	4.64784	4.59296	4.63386	3.07576	2.83326	2.82881	3.88176	3.50829	3.66439	2.34158	2.9	2.95713	Lama5	-0.672689	-0.330445	-0.766821	2.05276e-14	9.49402e-11	8.84905e-05	0.767567	-0.0918081	0.339774	1	-0.434053	2.55236e-06	0.00753967	1.31354	NA
ENSMUSG00000015652	Steap1	62.0178	61.219	58.6571	8.85844	9.19138	9.59468	59.2644	65.15	62.8213	8.63837	8.80242	9.10842	Steap1	-2.72107	0.0418517	-2.7763	0	0	0.256031	1	-0.0593087	0.317621	1	-2.82223	0	0	-67.4342	NA
ENSMUSG00000015653	Steap2	181.873	182.677	185.176	64.6188	65.1428	63.7818	173.745	161.138	162.319	58.4738	58.8288	60.6557	Steap2	-1.50673	-0.144927	-1.62732	0	0	2.70238e-07	0.0026867	-0.120886	0.000143451	1	-1.48269	0	0	10.2306	NA
ENSMUSG00000015656	Hspa8	1357.97	1351.18	1372.26	1388.1	1365.29	1387.08	1498.76	1493.45	1507.37	1569.15	1535.98	1544.44	Hspa8	0.0207453	0.140727	0.188002	0.351603	1	2.54587e-10	2.75183e-06	0.167287	5.16148e-14	6.41056e-10	0.0473046	0.033203	1	0.336144	NA
ENSMUSG00000015659	Serac1	5.19771	5.85797	6.47783	13.664	12.7141	12.4965	6.79399	6.25601	6.43895	11.5635	12.4137	11.6262	Serac1	1.15248	0.15306	1.02696	1.02437e-69	8.55143e-66	0.0403635	1	-0.126837	0.0319577	1	0.872592	4.88189e-41	3.43783e-37	5.70098	NA
ENSMUSG00000015668	Pdzd11	34.091	35.4527	33.639	28.8335	29.3999	31.5011	36.1507	38.2687	38.5061	33.6716	33.6411	31.4069	Pdzd11	-0.200681	0.130301	-0.0641932	7.58076e-07	0.0024031	0.00109499	1	0.136717	0.000705299	1	-0.194267	9.97391e-07	0.00307097	-1.4909	NA
ENSMUSG00000015671	Psma2	126.803	131.094	130.389	108.878	115.389	113.067	125.794	135.449	133.093	117.547	114.56	114.088	Psma2	-0.203153	0.0223327	-0.165511	1.68004e-11	6.97218e-08	0.457727	1	0.0375381	0.215407	1	-0.187948	3.87929e-10	1.49314e-06	-8.41583	NA
ENSMUSG00000015672	Mrpl32	22.627	23.1021	23.3061	22.298	21.9076	21.9837	26.1587	27.2778	27.3574	22.0633	21.6542	22.6021	Mrpl32	-0.0607384	0.227197	-0.0580083	0.0985847	1	1.62856e-10	1.76666e-06	0.00280972	0.945499	1	-0.285127	5.31812e-16	2.53568e-12	-1.25497	NA
ENSMUSG00000015697	Setdb1	120.971	121.673	119.94	62.6165	59.3862	61.7971	123.2	118.151	122.331	60.9371	62.6373	62.7212	Setdb1	-0.979965	0.00432229	-0.960824	2.67325e-284	2.99323e-280	0.868673	1	0.0189719	0.507424	1	-0.965316	2.19229e-279	2.44988e-275	-223.334	NA
ENSMUSG00000015702	Anxa9	2.54833	2.52899	2.59054	2.6753	2.38647	2.54314	2.4089	2.86274	2.31915	2.12605	2.55102	2.4596	Anxa9	-0.0103764	-0.0140255	-0.1079	0.952663	1	0.928169	1	-0.0938026	0.375625	1	-0.0901517	0.402238	1	6.42772	NA
ENSMUSG00000015709	Arnt2	8.73022	8.03846	8.10583	1.87438	2.00842	1.83648	6.92789	6.73604	6.32124	1.71037	1.83787	1.84145	Arnt2	-2.14124	-0.316855	-2.20624	3.90376e-147	3.92015e-143	7.74021e-07	0.00755367	-0.0839375	0.48924	1	-1.90834	1.58259e-107	1.47498e-103	6.02276	NA
ENSMUSG00000015711	Prune1	31.7915	34.2875	32.3266	53.3739	55.1245	55.9183	31.6819	32.227	31.1745	49.2365	52.0463	52.3183	Prune1	0.741233	-0.0495287	0.642598	5.52844e-101	5.08506e-97	0.186199	1	-0.0982533	0.00287566	1	0.69251	3.50869e-87	3.11046e-83	-13.982	NA
ENSMUSG00000015714	Cers2	140.749	142.563	142.383	225.861	225.488	225.772	158.682	167.279	167.077	239.295	234.93	234.339	Cers2	0.669711	0.211933	0.735038	1.42464e-163	1.46097e-159	2.50741e-17	2.93968e-13	0.0654691	0.00605483	1	0.523247	4.28175e-103	3.95548e-99	2.46893	NA
ENSMUSG00000015733	Capza2	270.403	270.862	268.77	268.31	278.724	273.388	285.08	281.79	285.425	284.866	277.021	280.097	Capza2	0.0182804	0.0733697	0.0557226	0.419211	1	0.00120867	1	0.0375198	0.0967226	1	-0.0175695	0.436619	1	-0.239465	NA
ENSMUSG00000015745	Plekho1	34.1076	35.9687	35.7155	30.1791	28.4376	28.1933	35.0962	39.3115	37.7158	32.9634	31.7293	29.854	Plekho1	-0.285646	0.0840037	-0.162928	1.71499e-10	6.7708e-07	0.0562917	1	0.123194	0.0060504	1	-0.246456	2.14717e-08	7.52368e-05	-2.93388	NA
ENSMUSG00000015747	Vps45	16.8117	16.4941	16.8771	27.0875	30.3106	28.4489	15.8822	16.5683	15.8556	30.0228	28.1787	27.5774	Vps45	0.774743	-0.0549886	0.772557	2.39548e-63	1.94321e-59	0.276016	1	-0.000420483	0.990551	1	0.829313	2.57027e-72	2.158e-68	-15.0816	NA
ENSMUSG00000015748	Prpf3	66.3335	65.8297	66.847	52.7972	51.8251	54.1442	72.3026	72.9628	74.6258	55.0098	55.0203	55.2733	Prpf3	-0.325329	0.143975	-0.2677	8.61688e-34	5.67249e-30	2.86659e-08	0.000294112	0.057478	0.0341519	1	-0.411827	1.23538e-55	9.65699e-52	-2.8604	NA
ENSMUSG00000015749	Anp32e	157.829	159.407	160.158	127.636	131.611	131.771	165.126	162.214	167.077	133.096	129.673	136.853	Anp32e	-0.288012	0.0505291	-0.256867	1.80084e-29	1.12715e-25	0.0455591	1	0.0314338	0.222011	1	-0.307108	1.07299e-33	7.05279e-30	-6.07784	NA
ENSMUSG00000015750	Aph1a	65.4003	65.4302	64.189	96.0311	96.1773	96.6188	62.5784	66.0935	66.8402	93.6219	95.8365	93.9752	Aph1a	0.566861	0.0036553	0.539374	3.86347e-97	3.51769e-93	0.90101	1	-0.0272374	0.296148	1	0.535969	1.85163e-87	1.64313e-83	146.628	NA
ENSMUSG00000015755	Tab2	97.6262	97.8878	98.3273	108.926	108.12	108.166	114.329	106.515	106.962	110.526	110.251	110.876	Tab2	0.146392	0.157824	0.174643	7.75372e-08	0.00026603	7.44566e-09	7.76433e-05	0.0282998	0.292567	1	0.0168677	0.532418	1	0.106876	NA
ENSMUSG00000015757	Ppil4	33.2912	34.8534	36.0644	37.1952	40.1915	39.0037	35.2134	36.8451	35.9165	38.8445	37.222	38.8095	Ppil4	0.159136	0.0512959	0.141088	1.64814e-05	0.0459666	0.172556	1	-0.018473	0.609402	1	0.0893669	0.0149563	1	1.74219	NA
ENSMUSG00000015759	Cnih1	79.647	79.5784	82.4625	75.7837	76.7077	79.5538	92.7886	96.9641	94.6362	85.4623	82.0895	82.0043	Cnih1	-0.0583849	0.234829	0.0461496	0.0449975	1	3.46356e-16	4.02881e-12	0.104538	0.000290052	1	-0.188676	3.73296e-11	1.49654e-07	-0.803463	NA
ENSMUSG00000015766	Eps8	175.358	175.919	173.315	20.8082	21.8904	21.8935	191.52	186.116	183.002	19.0458	18.8775	20.3255	Eps8	-3.02357	0.0958945	-3.17166	0	0	0.000186026	1	-0.149141	0.000189508	1	-3.2686	0	0	-34.0854	NA
ENSMUSG00000015776	Med22	106.158	104.979	106.384	137.407	136.68	136.598	107.952	107.078	106.777	136.237	132.844	131.456	Med22	0.371271	0.0193512	0.334948	9.26391e-58	7.31664e-54	0.417508	1	-0.0361598	0.1097	1	0.31576	1.65071e-42	1.17877e-38	16.3174	NA
ENSMUSG00000015790	Surf1	33.1412	30.892	30.7983	49.0489	47.9415	49.3329	28.5019	31.4325	31.2922	48.1742	48.4806	48.338	Surf1	0.626589	-0.0558825	0.613374	4.02219e-67	3.32152e-63	0.147813	1	-0.0135338	0.700561	1	0.668939	3.52288e-76	3.00643e-72	-11.9704	NA
ENSMUSG00000015804	Med28	44.2219	45.9057	43.108	58.9483	59.4893	58.8502	47.331	50.2693	48.7972	68.4656	68.7066	67.2743	Med28	0.412214	0.136093	0.618165	2.298e-42	1.64997e-38	1.25055e-05	0.114925	0.205857	5.43284e-13	6.73184e-09	0.481978	5.15239e-61	4.13583e-57	3.54155	NA
ENSMUSG00000015806	Qdpr	17.3282	16.9768	16.495	18.9661	19.5706	18.7662	17.8237	19.5477	19.3532	21.6938	21.6239	20.7476	Qdpr	0.17322	0.159522	0.334712	7.62565e-05	0.197733	0.000313842	1	0.161933	0.00010656	1	0.17563	2.89029e-05	0.0755811	1.10098	NA
ENSMUSG00000015837	Sqstm1	233.095	233.294	227.887	332.128	332.081	327.455	296.428	311.833	310.614	357.702	364.465	353.641	Sqstm1	0.514353	0.404416	0.631814	6.076e-94	5.47812e-90	1.95138e-58	2.43688e-54	0.117554	1.76591e-06	0.0210214	0.227491	3.0179e-20	1.60492e-16	0.562518	NA
ENSMUSG00000015839	Nfe2l2	162.511	166.515	164.893	109.118	109.925	109.068	160.021	160.807	163.294	105.8	103.833	103.986	Nfe2l2	-0.590321	-0.0289234	-0.655242	1.78323e-148	1.79482e-144	0.19238	1	-0.0651323	0.0055712	1	-0.62653	8.27889e-167	8.5314e-163	21.6617	NA
ENSMUSG00000015846	Rxra	137.45	133.808	137.698	92.427	90.5753	90.6949	144.539	137.75	140.105	92.806	93.6364	91.186	Rxra	-0.579502	0.0466251	-0.558756	4.80608e-111	4.52685e-107	0.0641502	1	0.0205363	0.43981	1	-0.605591	6.57293e-123	6.33762e-119	-12.9885	NA
ENSMUSG00000015850	Adamtsl4	110.273	106.693	105.072	40.0785	38.1122	37.861	82.0435	83.3744	83.4539	46.4499	45.0666	44.8251	Adamtsl4	-1.47325	-0.371933	-1.23989	0	0	7.63114e-42	9.45498e-38	0.232613	3.9284e-13	4.86965e-09	-0.868709	2.94312e-192	3.10823e-188	2.33566	NA
ENSMUSG00000015869	Prpsap1	96.2931	98.3872	95.2208	65.7401	61.9122	64.714	96.3703	102.095	100.421	62.3997	63.8057	60.5501	Prpsap1	-0.591423	0.0440833	-0.634609	3.1781e-83	2.77798e-79	0.139185	1	-0.0432677	0.173435	1	-0.678774	7.82349e-110	7.3353e-106	-15.3975	NA
ENSMUSG00000015880	Ncapg	75.2314	72.3378	74.688	18.021	17.9209	19.112	75.4491	71.44	70.7246	19.5384	18.2099	19.3304	Ncapg	-2.0138	-0.0304809	-1.96168	0	0	0.344252	1	0.0508107	0.238372	1	-1.93252	0	0	63.4009	NA
ENSMUSG00000015882	Lcorl	11.9295	11.5672	12.5745	13.4558	13.7795	12.9626	14.7273	12.4963	13.7201	12.164	14.0827	13.6164	Lcorl	0.155774	0.183001	0.142269	0.0135681	1	0.00385759	1	-0.0109641	0.858993	1	-0.0381913	0.540538	1	-0.208694	NA
ENSMUSG00000015889	Lta4h	48.8875	50.5829	49.2545	47.0145	46.1888	46.2507	50.4775	52.8018	53.186	48.867	48.9055	48.0968	Lta4h	-0.0928838	0.0732508	-0.0278586	0.0015632	1	0.0117891	1	0.064859	0.0258654	1	-0.101276	0.000437773	0.960475	-1.38259	NA
ENSMUSG00000015932	Dstn	193.037	191.699	194.014	149.725	146.132	151.498	193.947	197.223	197.564	163.395	164.101	162.273	Dstn	-0.37126	0.0246799	-0.240838	1.39527e-60	1.11831e-56	0.268921	1	0.130371	9.51823e-09	0.000115951	-0.265569	1.93182e-32	1.25085e-28	-10.7605	NA
ENSMUSG00000015937	H2afy	55.9859	59.7543	56.0822	69.6967	64.971	64.6087	54.394	56.0296	55.6411	69.4047	68.2211	66.219	H2afy	0.21394	-0.0491784	0.24695	4.80898e-10	1.86444e-06	0.16066	1	0.0326724	0.33343	1	0.295791	6.1066e-18	3.06857e-14	-6.01466	NA
ENSMUSG00000015942	Gtf2ird2	11.113	10.2855	10.3319	10.236	9.7069	10.7674	10.2083	10.3445	10.5756	10.4397	10.4563	10.209	Gtf2ird2	-0.0446748	-0.027724	-0.0278913	0.395424	1	0.614503	1	0.0158364	0.754784	1	-0.00111448	0.994348	1	0.0401992	NA
ENSMUSG00000015943	Bola1	14.9121	14.4468	14.4019	16.6114	16.7868	15.5186	14.8612	16.651	16.3096	17.2599	16.1918	15.7874	Bola1	0.15968	0.128403	0.169324	0.00185466	1	0.0135662	1	0.0105812	0.847865	1	0.0418579	0.409045	1	0.325987	NA
ENSMUSG00000015944	Castor2	42.8889	38.8482	40.5497	100.324	97.8442	97.115	26.2758	25.8377	24.8687	91.2356	92.8929	97.0961	Castor2	1.27243	-0.668231	1.20214	8.50489e-303	9.59777e-299	5.98311e-66	7.48547e-62	-0.0702915	0.0287206	1	1.87037	0	0	-2.79899	NA
ENSMUSG00000015961	Adss	122.337	123.155	123.91	87.2049	91.1252	90.5145	139.736	144.155	141.736	94.4841	96.6104	94.0355	Adss	-0.458654	0.204468	-0.373653	5.67814e-73	4.80087e-69	8.73833e-17	1.02099e-12	0.0849773	0.000990002	1	-0.578145	1.44811e-119	1.38555e-115	-2.82756	NA
ENSMUSG00000015971	Actr8	23.5768	22.1201	23.1234	38.8931	40.3805	38.4023	21.2213	21.6168	21.926	38.3364	37.3586	37.1059	Actr8	0.773791	-0.0877723	0.713243	1.84137e-111	1.73641e-107	0.0232785	1	-0.0602702	0.0569204	1	0.801295	4.79152e-117	4.56057e-113	-9.12925	NA
ENSMUSG00000015980	Lrrc27	1.31528	1.39713	1.16189	0.416692	0.427482	0.423165	1.33773	1.50543	1.3943	0.601884	0.487447	0.439319	Lrrc27	-1.68527	0.132659	-1.35003	2.02581e-19	1.06254e-15	0.38642	1	0.288021	0.225279	1	-1.53008	5.11978e-19	2.64283e-15	-11.5339	NA
ENSMUSG00000015994	Fnta	87.1286	86.6691	83.8414	124.848	123.93	126.163	85.7256	88.8699	87.7923	134.22	136.425	130.838	Fnta	0.541641	0.0263969	0.639982	5.91466e-95	5.34804e-91	0.331694	1	0.0985166	9.10905e-05	1	0.613761	9.3418e-124	9.01764e-120	23.2512	NA
ENSMUSG00000016018	Mtrex	56.2525	53.0797	57.4112	54.1267	54.4715	55.3019	61.9591	57.6021	58.3315	53.732	53.0326	55.3336	Mtrex	-0.02467	0.0933796	-0.0401966	0.472268	1	0.00624348	1	-0.0160835	0.64088	1	-0.134133	7.77944e-05	0.192463	-1.43643	NA
ENSMUSG00000016024	Lbp	23.3435	23.3185	23.0901	7.38474	8.05723	7.80548	17.3718	17.8759	18.6134	6.76011	6.14709	6.53031	Lbp	-1.58985	-0.373619	-1.84448	2.94064e-268	3.26412e-264	2.69822e-20	3.2125e-16	-0.258654	1.58701e-05	0.18541	-1.47488	7.15248e-199	7.59307e-195	3.94757	NA
ENSMUSG00000016087	Fli1	3.6814	3.39452	3.22181	4.38928	4.05333	4.19702	3.69765	3.59105	3.49624	4.48157	4.31112	4.34419	Fli1	0.299114	0.067409	0.353272	0.00027074	0.650402	0.447414	1	0.0548673	0.481524	1	0.286574	0.000281658	0.642743	4.25127	NA
ENSMUSG00000016128	Stard13	31.325	29.5604	29.652	22.1698	21.014	22.1642	26.8449	24.977	26.1131	20.6161	21.0776	21.3055	Stard13	-0.469846	-0.216583	-0.522798	1.46662e-33	9.62691e-30	1.57674e-08	0.000163129	-0.0538395	0.192078	1	-0.307102	1.19586e-14	5.47824e-11	1.41794	NA
ENSMUSG00000016179	Camk1g	1.48191	1.03094	1.44429	0.11234	0.100984	0.0923889	1.17036	1.04195	1.25978	0.0784345	0.0625944	0.0774779	Camk1g	-4.17169	-0.19396	-4.16735	2.13477e-47	1.58421e-43	0.23263	1	-0.748219	0.387462	1	-4.72638	1.00178e-47	7.45924e-44	24.3678	NA
ENSMUSG00000016181	Diexf	24.1433	24.6667	24.5022	15.2338	14.1748	14.3158	28.8199	29.3468	28.2655	15.3354	14.1586	15.5009	Diexf	-0.746564	0.237864	-0.705399	4.31476e-72	3.64122e-68	2.82468e-10	3.04981e-06	0.0411068	0.36429	1	-0.943325	1.63542e-124	1.57998e-120	-3.96582	NA
ENSMUSG00000016194	Hsd11b1	1.44858	1.29726	1.66025	0.0322478	0.0322478	0.0472831	1.957	1.86958	2.01648	0.0322478	0.0322478	0.0473245	Hsd11b1	-7.6059	0.414288	-5.31737	1.27962e-74	1.0887e-70	0.0014027	1	-0.0548661	1	1	-8.08471	6.18491e-99	5.66104e-95	-19.5147	NA
ENSMUSG00000016206	H2-M3	5.39766	6.15758	5.86317	11.7097	11.1504	12.6468	6.45925	6.65327	6.75844	10.5012	10.517	10.4804	H2-M3	1.03385	0.190926	0.856794	1.37256e-63	1.11493e-59	0.00638735	1	-0.17585	0.00160553	1	0.667082	1.17288e-27	7.12641e-24	3.49394	NA
ENSMUSG00000016252	Atp5e	49.9873	50.1169	47.5435	50.026	55.2448	54.6253	47.4481	51.759	52.7488	60.9987	61.6511	58.9822	Atp5e	0.114929	0.0415374	0.299027	0.0054862	1	0.319898	1	0.184079	5.9506e-06	0.0701337	0.257471	2.95579e-10	1.14419e-06	6.19854	NA
ENSMUSG00000016253	Nelfcd	65.5503	69.5914	65.601	51.724	50.038	51.4378	61.8419	63.9251	62.0646	51.7922	52.8657	51.097	Nelfcd	-0.389728	-0.0958957	-0.365642	1.24274e-37	8.5575e-34	0.00136228	1	0.0234589	0.447559	1	-0.270374	6.31487e-19	3.25089e-15	2.81945	NA
ENSMUSG00000016256	Ctsz	302.828	298.609	292.708	491.896	498.526	496.452	288.21	299.716	298.608	487.702	488.613	469.672	Ctsz	0.733751	-0.0123249	0.693375	2.9411e-191	3.09845e-187	0.624757	1	-0.0402309	0.100388	1	0.705845	2.9334e-177	3.05543e-173	-57.2698	NA
ENSMUSG00000016257	Prelid3b	75.9479	78.9625	76.2163	59.4289	61.328	62.6541	86.4118	89.8133	90.4155	63.2003	67.8721	64.5153	Prelid3b	-0.333528	0.206294	-0.241295	1.38677e-25	8.19579e-22	3.34303e-11	3.67365e-07	0.0926165	0.00394197	1	-0.447206	2.11085e-46	1.55633e-42	-2.16781	NA
ENSMUSG00000016262	Sertad4	10.3465	10.5851	11.0462	3.42817	3.34878	3.5505	23.2297	24.8942	25.1714	4.66632	4.50837	4.61557	Sertad4	-1.63759	1.19894	-1.21304	1.39901e-124	1.35494e-120	3.22332e-137	4.05913e-133	0.418644	1.95721e-07	0.00235785	-2.41791	0	0	-2.01671	CBP.dependent
ENSMUSG00000016308	Ube2a	14.7455	14.8629	15.9801	16.8677	17.4054	16.9018	15.5474	15.0951	16.3096	18.5377	17.436	16.8729	Ube2a	0.166469	0.0423894	0.212995	0.000542288	1	0.391731	1	0.0467466	0.319844	1	0.170827	0.000314378	0.707666	4.02994	NA
ENSMUSG00000016319	Slc25a5	114.922	119.56	117.73	75.8478	78.7183	77.4489	124.539	131.278	125.661	78.9346	80.7694	79.2302	Slc25a5	-0.602621	0.115227	-0.559714	4.8541e-104	4.49975e-100	1.89624e-05	0.172482	0.0426251	0.136594	1	-0.675223	2.39768e-133	2.35764e-129	-5.85995	NA
ENSMUSG00000016344	Ppdpf	54.0363	54.0783	54.5705	28.401	28.2486	27.9227	47.2306	52.7687	52.9001	31.3468	29.7112	29.9746	Ppdpf	-0.944733	-0.0895206	-0.838011	9.86119e-128	9.60874e-124	0.0171933	1	0.106359	0.0103231	1	-0.748855	6.57248e-82	5.72857e-78	8.36517	NA
ENSMUSG00000016356	Col20a1	1.56522	1.3472	1.69348	1.13752	0.908637	0.844152	0.751938	0.826771	0.973915	0.925191	1.1399	0.84639	Col20a1	-0.691281	-0.87543	-0.666732	1.19222e-05	0.0338828	6.7387e-08	0.000684112	0.0124779	1	1	0.196672	0.271509	1	-0.224657	NA
ENSMUSG00000016382	Pls3	150.647	151.018	154.145	83.6969	86.4339	85.8235	165.092	159.947	164.387	90.0963	90.6169	94.8044	Pls3	-0.832867	0.102646	-0.726588	1.39493e-216	1.50346e-212	5.67218e-05	0.498585	0.106459	0.000101745	1	-0.829054	1.44621e-220	1.56552e-216	-8.07686	NA
ENSMUSG00000016386	Mpped2	17.3116	17.1599	17.2758	27.7443	27.7158	28.6143	13.3549	13.5722	15.0989	27.1285	28.1939	26.914	Mpped2	0.701719	-0.301029	0.668006	2.79244e-66	2.2979e-62	7.37993e-11	8.05741e-07	-0.0324778	0.397356	1	0.970274	1.04473e-118	9.98029e-115	-3.22319	NA
ENSMUSG00000016409	Nkap	13.2958	12.7823	13.2889	20.2316	19.519	19.0368	12.8528	12.6619	12.6775	19.0766	18.5285	19.6621	Nkap	0.57908	-0.0438321	0.540544	4.2686e-41	3.02985e-37	0.362278	1	-0.0372518	0.349463	1	0.585663	9.59297e-42	6.79854e-38	-13.3615	NA
ENSMUSG00000016427	Ndufa1	14.3456	14.9461	14.4185	23.0669	22.6981	23.6527	14.4093	16.0717	15.0485	23.0178	23.4295	23.3258	Ndufa1	0.669299	0.0592014	0.674901	1.25594e-57	9.91064e-54	0.19943	1	0.00657398	0.861898	1	0.616673	1.17912e-50	8.9554e-47	10.4165	NA
ENSMUSG00000016458	Wt1	1.63187	1.8299	1.64364	0.512803	0.582139	0.603588	0.701727	0.892981	0.923469	0.478719	0.335714	0.454396	Wt1	-1.63986	-1.04653	-2.02354	1.18142e-23	6.76124e-20	3.62864e-12	4.04412e-08	-0.450526	0.0568663	1	-1.04382	5.05969e-07	0.00160089	0.997417	NA
ENSMUSG00000016477	E2f3	56.1192	57.2575	57.5109	57.0261	56.2415	54.4148	61.8754	61.0284	59.475	59.2898	57.6453	60.8969	E2f3	-0.0277917	0.0939621	0.0571875	0.359817	1	0.00163679	1	0.0853164	0.00401553	1	-0.0364376	0.21646	1	-0.38779	NA
ENSMUSG00000016481	Cr1l	20.8941	22.5861	22.4921	29.6985	28.9703	29.0202	26.8449	27.4598	28.1141	30.5617	29.7719	29.6881	Cr1l	0.411043	0.321441	0.449205	5.58542e-29	3.47916e-25	8.83141e-18	1.03796e-13	0.0377691	0.276462	1	0.127371	0.00029218	0.664418	0.396249	NA
ENSMUSG00000016487	Ppfibp1	215.532	212.854	214.829	183.044	183.713	181.418	242.836	238.687	232.86	194.817	201.473	206.749	Ppfibp1	-0.230776	0.151423	-0.0934579	2.20965e-19	1.15786e-15	2.46506e-09	2.60212e-05	0.137761	7.55437e-08	0.000913852	-0.244439	5.51639e-22	3.04836e-18	-1.61428	NA
ENSMUSG00000016493	Cd46	1.33194	1.51365	1.14527	2.45104	2.19745	2.55817	1.1871	1.48887	1.46156	2.03367	2.15651	2.15806	Cd46	0.871548	0.0536385	0.678423	3.00312e-12	1.28563e-08	0.763143	1	-0.189111	0.0970056	1	0.628824	5.57708e-07	0.00176124	11.7234	NA
ENSMUSG00000016494	Cd34	34.4242	36.0019	36.2803	7.38474	7.74791	7.95584	43.4647	43.9296	43.2481	7.31435	8.01341	8.09828	Cd34	-2.21216	0.292212	-2.18857	0	0	4.98436e-19	5.90098e-15	0.0207811	0.728538	1	-2.4836	0	0	-8.49929	NA
ENSMUSG00000016495	Plgrkt	21.7938	24.184	22.5918	34.3759	36.1532	37.861	22.2088	23.9673	23.389	35.6576	35.9019	36.6385	Plgrkt	0.661816	0.0208898	0.659286	7.13394e-54	5.51168e-50	0.650596	1	-0.00304494	0.948933	1	0.637882	9.5886e-51	7.28638e-47	30.5356	NA
ENSMUSG00000016496	Cd274	0.782073	1.06423	1.12866	6.37557	5.90921	6.04636	1.17036	1.29024	1.25978	6.28285	6.75402	6.90722	Cd274	2.66116	0.331557	2.76182	3.2994e-141	3.2895e-137	0.0344832	1	0.122036	0.0792401	1	2.45168	3.72324e-139	3.69755e-135	7.39444	NA
ENSMUSG00000016503	Gtf3a	17.9614	19.2072	18.1729	9.57927	8.9508	8.60235	19.6145	20.8719	21.1693	9.62369	9.16658	9.59088	Gtf3a	-1.03166	0.156125	-0.963161	1.38002e-90	1.23222e-86	0.000666574	1	0.0659304	0.257072	1	-1.12186	1.25764e-114	1.18998e-110	-7.18569	NA
ENSMUSG00000016510	Mtif3	5.29769	4.9425	5.34819	6.29548	6.92307	6.54252	5.25419	5.5277	5.34594	7.17579	6.63264	6.95246	Mtif3	0.342366	0.0494899	0.41353	4.1402e-07	0.00134267	0.501255	1	0.072917	0.254962	1	0.365795	2.82231e-08	9.79907e-05	7.39129	NA
ENSMUSG00000016520	Lnx2	20.8774	21.0548	19.8507	14.8333	14.7934	14.2706	19.9158	20.276	20.3622	15.3047	14.978	15.2145	Lnx2	-0.494829	-0.0289941	-0.441009	4.24787e-34	2.80954e-30	0.457776	1	0.0526253	0.224406	1	-0.413211	7.17528e-25	4.15592e-21	14.2515	NA
ENSMUSG00000016526	Dyrk3	4.23127	4.7927	4.20194	1.9865	2.18026	1.80641	6.27514	6.66983	6.89297	2.58791	2.2172	2.12791	Dyrk3	-1.16408	0.58819	-0.934339	4.01246e-31	2.56115e-27	2.83145e-13	3.20407e-09	0.222341	0.0517621	1	-1.52996	1.03003e-65	8.44622e-62	-2.60113	CBP.dependent
ENSMUSG00000016528	Mapkapk2	230.245	235.275	232.023	148.428	142.214	146.401	188.139	188.185	183.741	139.208	140.143	136.974	Mapkapk2	-0.674377	-0.316716	-0.744583	1.03222e-175	1.07175e-171	4.21032e-41	5.21279e-37	-0.0703395	0.00409953	1	-0.428001	2.32836e-70	1.94255e-66	1.35137	NA
ENSMUSG00000016534	Lamp2	405.971	408.083	415.888	569.682	562.674	584.318	431.913	419.242	429.634	579.491	585.373	604.005	Lamp2	0.481133	0.0584367	0.524089	1.02937e-84	9.04194e-81	0.0184475	1	0.0431462	0.0772104	1	0.465842	6.96827e-80	6.03313e-76	7.97174	NA
ENSMUSG00000016541	Atxn10	200.802	202.601	200.144	168.451	170.43	167.39	200.056	206.542	206.207	178.313	179.229	177.108	Atxn10	-0.253749	0.0219738	-0.17487	1.62157e-29	1.01656e-25	0.324945	1	0.0788449	0.00047446	1	-0.196878	1.15451e-18	5.9065e-15	-8.95968	NA
ENSMUSG00000016552	Foxred2	19.811	20.0228	19.8507	2.46706	2.81607	2.55817	15.9993	15.7075	16.2928	2.12605	2.2172	2.4596	Foxred2	-2.9459	-0.31498	-3.13586	0	0	3.58402e-15	4.13632e-11	-0.203725	0.0353804	1	-2.83466	0	0	8.9995	NA
ENSMUSG00000016554	Eif3d	81.5466	83.8228	82.014	53.6462	55.4338	52.2798	91.048	97.8579	95.6283	56.6572	55.3238	55.2431	Eif3d	-0.617497	0.201964	-0.564962	5.73437e-87	5.06861e-83	1.54647e-11	1.70761e-07	0.0522239	0.107142	1	-0.767237	1.32784e-138	1.31788e-134	-3.79889	NA
ENSMUSG00000016559	H3f3b	649.881	661.818	655.687	915.81	911.494	913.485	646.281	674.549	665.741	828.237	843.213	828.497	H3f3b	0.478334	0.0140064	0.345607	1.22097e-99	1.11963e-95	0.536912	1	-0.132701	3.32736e-09	4.06503e-05	0.331626	6.80068e-49	5.09983e-45	23.6769	NA
ENSMUSG00000016619	Nup50	149.497	148.954	148.58	132.73	128.982	130.147	152.456	148.84	149.825	129.74	129.081	135.617	Nup50	-0.189996	0.0131285	-0.180929	2.84359e-14	1.30862e-10	0.598166	1	0.00942981	0.707642	1	-0.193694	6.897e-15	3.18296e-11	-14.7537	NA
ENSMUSG00000016624	Phf21b	4.73115	3.94381	4.11888	3.70048	3.53781	3.68582	4.60145	4.79939	4.58925	2.74187	2.86966	3.06267	Phf21b	-0.228529	0.130058	-0.557735	0.00714747	1	0.117423	1	-0.336487	0.000202269	1	-0.695075	7.59712e-16	3.60711e-12	-5.34437	NA
ENSMUSG00000016637	Ift27	18.0114	17.9588	17.5416	18.021	17.0617	17.7137	15.8989	17.578	18.6134	18.2452	16.9808	16.5412	Ift27	-0.0188608	-0.038949	-0.0489646	0.719115	1	0.462535	1	-0.0292746	0.582325	1	-0.00918619	0.868195	1	0.235852	NA
ENSMUSG00000016664	Pacsin2	107.757	105.611	106.401	71.2825	72.9444	70.5627	120.354	119.062	120.852	75.6091	73.4104	74.7222	Pacsin2	-0.574807	0.172066	-0.515252	2.94827e-119	2.8271e-115	3.34602e-13	3.78435e-09	0.0593978	0.0206313	1	-0.687476	1.38773e-177	1.44601e-173	-3.99541	NA
ENSMUSG00000016756	Cmah	0.198876	0.265277	0.331269	7.16048	7.50733	6.69287	0.249829	0.181221	0.200403	7.8532	7.1637	8.29428	Cmah	4.91312	-0.383083	4.90151	4.4102e-241	4.82652e-237	0.301387	1	0.12859	0.0949391	1	5.42527	1.32269e-274	1.4744e-270	-14.1621	NA
ENSMUSG00000016757	Ttll12	104.091	103.148	101.135	106.635	102.346	101.114	102.53	104.727	105.348	118.162	119.021	113.68	Ttll12	0.00795518	0.019671	0.186046	0.774864	1	0.480293	1	0.178297	6.54912e-11	8.05738e-07	0.166581	1.13315e-09	4.26064e-06	8.46833	NA
ENSMUSG00000016831	Tox4	56.0858	55.127	53.3412	91.5139	89.1662	91.4016	57.9088	53.8446	55.2879	91.8053	92.2556	91.8946	Tox4	0.726072	0.0216014	0.746183	6.34618e-139	6.30176e-135	0.48213	1	0.020144	0.461913	1	0.724615	3.80882e-140	3.79016e-136	33.5448	NA
ENSMUSG00000016833	Mrps18c	6.21414	6.49048	6.39476	5.11011	6.0295	5.61033	6.27514	7.69608	7.39743	6.22127	5.7981	5.79155	Mrps18c	-0.191918	0.162885	-0.101344	0.0167606	1	0.0357634	1	0.0904045	0.263996	1	-0.264403	0.000606935	1	-1.62325	NA
ENSMUSG00000016921	Srsf6	244.042	246.477	246.26	207.52	203.269	199.671	237.731	247.41	244.782	192.954	194.235	196.617	Srsf6	-0.271475	-0.0134778	-0.33577	4.62507e-30	2.91934e-26	0.569903	1	-0.0642964	0.00730666	1	-0.322293	1.10976e-41	7.85712e-38	23.913	NA
ENSMUSG00000016933	Plcg1	175.841	178.699	173.897	189.035	189.264	188.996	170.164	161.337	164.051	197.788	198.894	197.537	Plcg1	0.102374	-0.0927368	0.169348	1.96625e-05	0.0544357	0.000128794	1	0.0669195	0.00480678	1	0.262031	7.36242e-28	4.48887e-24	-2.82553	NA
ENSMUSG00000016940	Kctd2	32.3247	32.5065	32.9412	29.4582	27.2691	28.6594	27.9161	30.2903	29.4425	28.0522	28.4215	26.4768	Kctd2	-0.194798	-0.157762	-0.237812	5.48676e-07	0.00176125	5.35137e-05	0.471349	-0.0427418	0.285134	1	-0.0797772	0.0437327	1	0.50568	NA
ENSMUSG00000016942	Tmprss6	0.998689	0.897784	1.0456	1.57002	1.38979	1.41549	0.634779	0.760561	0.688052	1.46404	1.35233	1.32884	Tmprss6	0.588026	-0.516412	0.496229	5.38823e-05	0.14268	0.00335927	1	-0.0807269	0.561009	1	1.0238	1.31279e-10	5.1619e-07	-1.98253	NA
ENSMUSG00000016946	Kctd5	70.8324	69.9077	69.7043	57.0421	56.3446	56.3544	73.1561	76.472	77.064	59.7209	59.542	60.3089	Kctd5	-0.310238	0.107354	-0.228865	5.19409e-30	3.27539e-26	5.11622e-05	0.451353	0.0812766	0.00317543	1	-0.336315	1.88957e-36	1.2766e-32	-3.13278	NA
ENSMUSG00000016984	Etaa1	24.8931	23.0688	24.3527	11.3413	12.1814	12.1958	25.1545	22.8748	24.936	12.3795	12.2923	12.3348	Etaa1	-1.01948	0.0127601	-0.965776	2.54357e-99	2.33119e-95	0.778068	1	0.0512401	0.339746	1	-0.981008	1.26387e-94	1.1433e-90	-76.8809	NA
ENSMUSG00000016995	Matn4	1.04868	1.28062	1.07882	0.160396	0.152537	0.1826	0.85236	0.992296	0.923469	0.278577	0.229501	0.167938	Matn4	-3.02744	-0.308817	-2.35872	7.60706e-34	5.01229e-30	0.0597494	1	0.522392	0.212774	1	-2.1968	2.75243e-20	1.46457e-16	7.1136	NA
ENSMUSG00000017002	Slpi	11.7628	10.6018	9.96641	0.288544	0.37593	0.317918	6.79399	6.78569	7.02749	0.278577	0.350887	0.363935	Slpi	-5.18214	-0.652091	-5.03083	0	0	4.67283e-19	5.5331e-15	0.025343	1	1	-4.50494	3.7992e-234	4.1453e-230	6.90845	NA
ENSMUSG00000017009	Sdc4	432.515	427.74	432.069	942.641	902.095	918.176	420.934	435.547	427.751	653.297	643.79	652.823	Sdc4	1.0963	-0.00905367	0.593426	0	0	0.702028	1	-0.502831	7.48935e-105	9.44931e-101	0.602527	1.24793e-145	1.25056e-141	-66.5506	NA
ENSMUSG00000017057	Il13ra1	37.4402	37.1671	36.6624	18.9982	19.983	20.8711	36.1507	33.7664	35.5802	20.7855	21.4721	21.8935	Il13ra1	-0.894723	-0.0770322	-0.794791	1.19225e-120	1.14754e-116	0.0327732	1	0.0995145	0.0159139	1	-0.718178	1.44588e-79	1.25011e-75	9.32309	NA
ENSMUSG00000017119	Nbr1	197.086	194.462	198.5	389.698	384.424	378.515	175.704	173.453	174.106	345.955	346.302	358.466	Nbr1	0.966091	-0.17333	0.832335	0	0	9.46943e-13	1.06417e-08	-0.133497	5.37732e-09	6.56356e-05	1.00592	0	0	-5.80353	NA
ENSMUSG00000017132	Cyth1	26.7094	26.1481	26.1302	36.7627	36.8578	36.6281	23.146	23.6528	24.6838	34.6569	34.3391	34.6333	Cyth1	0.481403	-0.144293	0.391794	2.65669e-52	2.03449e-48	3.2112e-05	0.287113	-0.0892766	0.00270931	1	0.536421	7.04911e-62	5.68088e-58	-3.71757	NA
ENSMUSG00000017144	Rnd3	113.189	114.749	114.657	15.9066	14.5872	13.6692	104.002	98.6193	100.438	12.3795	14.0524	13.2545	Rnd3	-2.95941	-0.176983	-3.11169	0	0	3.66258e-08	0.000374902	-0.152994	0.00165783	1	-2.93543	0	0	16.586	NA
ENSMUSG00000017146	Brca1	78.6139	77.5643	79.572	21.0645	18.1443	20.0743	84.236	76.4389	76.3073	19.8156	20.1065	20.9286	Brca1	-1.99174	0.00750303	-1.95422	0	0	0.854728	1	0.0363372	0.457113	1	-1.9629	0	0	-261.615	NA
ENSMUSG00000017167	Cntnap1	26.0095	26.8139	26.097	67.9507	64.2149	65.8416	29.2718	29.0985	30.1488	53.9168	54.2313	53.3736	Cntnap1	1.32845	0.165691	1.03336	0	0	3.10412e-06	0.0294736	-0.294365	1.38141e-25	1.73367e-21	0.868398	1.56004e-169	1.61183e-165	5.24107	NA
ENSMUSG00000017176	Nt5c3b	84.4792	85.0879	80.7183	39.0854	38.2325	37.7407	76.286	79.319	79.6536	37.2895	36.9337	37.4225	Nt5c3b	-1.12201	-0.0893375	-1.16428	1.49131e-302	1.68264e-298	0.00163652	1	-0.0432715	0.1913	1	-1.07594	1.44266e-276	1.60986e-272	12.0436	NA
ENSMUSG00000017188	Coa3	48.9375	47.7533	45.2011	53.9185	54.2825	52.3099	41.4228	49.1768	49.8734	55.8412	55.4452	55.0019	Coa3	0.177791	-0.0144725	0.229658	0.000278207	0.667141	0.771429	1	0.0512384	0.29148	1	0.243502	5.94032e-07	0.00187001	-16.8251	NA
ENSMUSG00000017210	Med24	118.988	123.288	120.023	124.784	123.036	121.683	105.994	105.505	106.424	116.654	120.432	112.429	Med24	0.0283314	-0.188562	-0.0522285	0.293785	1	5.08163e-12	5.65179e-08	-0.080199	0.00285255	1	0.136695	5.1458e-07	0.0016271	-0.724932	NA
ENSMUSG00000017221	Psmd3	266.02	273.925	258.985	251.475	243.084	243.107	246.2	251.631	253.559	244.914	246.371	242.42	Psmd3	-0.115102	-0.0885135	-0.122521	6.52845e-06	0.0190957	0.000531638	1	-0.00778121	0.761534	1	-0.0343702	0.178768	1	0.388304	NA
ENSMUSG00000017264	Exosc10	106.591	108.441	105.155	60.9026	60.022	58.1285	103.651	102.062	104.12	62.8462	61.6511	58.9822	Exosc10	-0.839259	-0.0474543	-0.803687	3.83551e-195	4.05106e-191	0.0795778	1	0.035542	0.231577	1	-0.756263	2.98566e-160	3.05195e-156	15.9367	NA
ENSMUSG00000017286	Glod4	29.0422	29.9265	30.4162	30.7237	31.2214	31.2605	31.1798	31.6807	30.9727	32.5785	31.9721	32.1607	Glod4	0.0604418	0.0701808	0.113873	0.0582696	1	0.0287869	1	0.0532401	0.0852823	1	0.0435008	0.162575	1	0.619839	NA
ENSMUSG00000017288	Vps53	18.9278	20.4056	20.1331	42.0808	41.2397	42.1009	19.8321	19.3656	18.3443	41.9698	42.7603	42.0661	Vps53	1.07814	-0.0474543	1.09308	4.49291e-214	4.83527e-210	0.241037	1	0.0153828	0.616243	1	1.14097	3.88189e-241	4.25261e-237	-24.0436	NA
ENSMUSG00000017291	Taok1	110.023	108.574	114.491	142.116	140.409	144.13	119.216	99.6787	106.407	128.909	129.491	138.316	Taok1	0.357317	-0.0341776	0.251815	1.93472e-15	9.17639e-12	0.451331	1	-0.105033	0.0187838	1	0.286462	1.96383e-10	7.66484e-07	-8.38157	NA
ENSMUSG00000017299	Dnttip1	25.1097	26.6142	25.3328	30.6917	30.1732	29.9825	24.4683	26.566	24.5997	29.7919	28.8615	28.2408	Dnttip1	0.237686	-0.0267185	0.173466	5.38717e-10	2.08591e-06	0.502108	1	-0.0643007	0.085094	1	0.200104	1.83587e-07	0.000601615	-7.48935	NA
ENSMUSG00000017307	Acot8	8.26366	7.32273	8.05599	16.4512	15.412	16.4207	7.46347	7.33193	7.41425	14.2885	16.0401	14.7923	Acot8	1.03407	-0.0905831	0.93265	2.14342e-73	1.81612e-69	0.173141	1	-0.0988454	0.0582849	1	1.02581	2.6533e-70	2.21205e-66	-11.3245	NA
ENSMUSG00000017314	Mpp2	24.4432	23.8844	22.4921	69.6967	66.3629	67.9165	18.0245	16.5517	16.8646	62.2458	63.0167	63.1735	Mpp2	1.52771	-0.462	1.4127	0	0	8.41668e-29	1.02641e-24	-0.114634	0.000143908	1	1.87508	0	0	-4.05861	NA
ENSMUSG00000017376	Nlk	23.0435	24.7833	24.7181	50.5706	49.9005	49.363	24.1502	23.3383	23.4899	49.2827	51.1208	48.6998	Nlk	1.04716	-0.0316037	1.03987	2.37966e-214	2.56123e-210	0.412436	1	-0.00690382	0.821787	1	1.07187	3.83211e-225	4.16128e-221	-33.9158	NA
ENSMUSG00000017386	Traf4	69.7827	69.3085	66.4317	30.083	29.6405	29.2157	61.1557	64.0907	64.4019	31.7163	32.4273	30.05	Traf4	-1.20946	-0.116	-1.12599	4.65284e-281	5.20281e-277	0.000244913	1	0.0830241	0.0248653	1	-1.01044	6.63634e-198	7.03917e-194	8.71067	NA
ENSMUSG00000017400	Stac2	80.8634	84.9381	83.1104	14.3208	13.1437	13.8346	66.2103	67.0701	66.3862	14.5657	14.2193	13.0736	Stac2	-2.59287	-0.318159	-2.57328	0	0	5.83209e-27	7.08074e-23	0.0178583	0.694939	1	-2.25686	0	0	7.0935	NA
ENSMUSG00000017404	Rpl19	274.885	280.1	274.883	208.513	206.431	216.209	281.498	298.111	310.53	217.372	207.664	208.242	Rpl19	-0.394789	0.101154	-0.390305	3.29644e-35	2.20993e-31	0.00139688	1	0.00467099	0.882647	1	-0.491272	8.9109e-54	6.89169e-50	-4.85667	NA
ENSMUSG00000017405	Nek8	12.746	12.3162	12.5912	9.2589	9.41477	9.74503	10.4092	10.8411	10.5756	9.16182	9.39418	9.07827	Nek8	-0.40608	-0.243102	-0.446324	6.29012e-17	3.10166e-13	4.10381e-07	0.00405046	-0.0415031	0.431661	1	-0.204481	5.1125e-05	0.129857	0.841133	NA
ENSMUSG00000017412	Cacnb4	1.58189	1.53029	1.56058	1.07345	1.21795	1.17493	1.40468	1.60474	1.6129	1.00217	1.01851	0.921773	Cacnb4	-0.442042	-0.0158483	-0.668487	0.00124437	1	0.933775	1	-0.242438	0.116142	1	-0.668638	1.64663e-06	0.00496624	42.1899	NA
ENSMUSG00000017418	Arl5b	34.6242	34.0378	35.4497	74.1018	74.7831	73.7051	40.0169	36.3651	34.1004	70.9289	72.3331	73.8176	Arl5b	1.09681	0.085786	1.0601	1.51885e-173	1.57353e-169	0.0390289	1	-0.0360338	0.330126	1	0.974995	5.31898e-139	5.28121e-135	11.3654	NA
ENSMUSG00000017421	Zfp207	173.975	174.055	176.787	194.257	195.811	191.311	164.557	173.189	170.155	187.673	188.667	186.968	Zfp207	0.147532	-0.0472561	0.10214	6.60249e-10	2.54658e-06	0.0502991	1	-0.0454094	0.0551017	1	0.149379	4.25911e-10	1.63592e-06	-3.16104	NA
ENSMUSG00000017428	Psmd11	93.2272	97.9877	92.9948	100.693	100.8	103.806	102.429	105.406	105.011	102.166	104.334	103.941	Psmd11	0.103581	0.138557	0.127724	0.000128134	0.32277	2.96735e-07	0.00294628	0.0238539	0.369137	1	-0.0111216	0.678205	1	-0.0802677	NA
ENSMUSG00000017446	C1qtnf1	19.8943	19.3071	18.854	1.34576	1.30387	1.11479	13.0202	13.5226	12.4589	1.03296	1.09438	1.13285	C1qtnf1	-3.9845	-0.574761	-4.1551	0	0	1.73461e-33	2.13062e-29	-0.207839	0.145933	1	-3.61763	0	0	6.29414	NA
ENSMUSG00000017466	Timp2	1600.66	1604.27	1584.73	765.973	737.351	737.602	1531.32	1565.18	1558.68	758.049	756.498	758.436	Timp2	-1.09586	-0.0410894	-1.07532	0	0	0.0755843	1	0.0204877	0.381987	1	-1.03428	0	0	25.1714	NA
ENSMUSG00000017478	Zc3h18	96.5597	97.3552	100.487	71.9393	66.3285	69.3298	96.2699	96.1695	97.4612	68.4964	69.3591	69.7017	Zc3h18	-0.503654	-0.0222576	-0.504103	3.13198e-68	2.59798e-64	0.432091	1	-0.000786706	0.988467	1	-0.482183	5.18515e-63	4.20101e-59	21.6638	NA
ENSMUSG00000017485	Top2b	154.03	156.478	158.547	120.732	116.987	119.818	155.854	146.291	141.804	119.964	113.18	120.962	Top2b	-0.391617	-0.0793791	-0.406102	6.77488e-33	4.41451e-29	0.0147873	1	-0.0140583	0.673195	1	-0.326296	2.53238e-23	1.43231e-19	4.1106	NA
ENSMUSG00000017493	Igfbp4	23.5434	22.403	23.9374	1.13752	1.20077	1.22003	31.9664	32.376	33.4278	1.2485	1.35233	1.14792	Igfbp4	-4.33056	0.48491	-4.22313	0	0	4.11573e-35	5.06276e-31	0.0763994	0.613252	1	-4.73913	0	0	-9.77321	NA
ENSMUSG00000017499	Cdc6	50.2205	49.8006	51.0653	11.3093	10.274	10.9027	57.4903	56.1785	57.3394	12.01	11.1998	12.2444	Cdc6	-2.21905	0.178739	-2.09232	0	0	4.82054e-10	5.18256e-06	0.124872	0.00935014	1	-2.27293	0	0	-12.7164	NA
ENSMUSG00000017548	Suz12	75.2147	74.4185	75.9505	70.5777	72.0337	72.6977	79.9681	75.2305	76.7277	72.0373	69.6929	72.325	Suz12	-0.0671827	0.0399686	-0.0758277	0.0180893	1	0.158731	1	-0.00854089	0.767129	1	-0.115692	4.1511e-05	0.1066	-2.89458	NA
ENSMUSG00000017550	Atad5	28.8255	28.4119	29.2533	12.1262	10.9613	11.5342	30.0082	28.3868	27.5592	10.7014	11.0936	12.4404	Atad5	-1.32211	-0.00897748	-1.33996	2.4275e-159	2.47605e-155	0.846561	1	-0.0168297	0.775854	1	-1.32997	6.00723e-163	6.16042e-159	148.145	NA
ENSMUSG00000017561	Crlf3	38.9732	39.7304	39.038	43.122	46.2919	42.5971	38.1926	39.0963	38.4052	44.9411	44.0348	44.5085	Crlf3	0.163812	-0.0252832	0.181054	5.16668e-07	0.00166419	0.453105	1	0.0173361	0.604214	1	0.206431	2.35325e-10	9.14238e-07	-8.16477	NA
ENSMUSG00000017615	Tnfaip1	81.9132	80.9433	82.6619	79.1156	77.756	76.7422	81.6083	82.2157	84.4124	74.6084	75.2463	77.1797	Tnfaip1	-0.0719005	0.015853	-0.113016	0.00584635	1	0.54344	1	-0.0409996	0.114518	1	-0.128753	6.90962e-07	0.00215718	-8.12166	NA
ENSMUSG00000017631	Abr	64.4339	63.3496	62.777	50.2503	49.4366	49.0322	64.0178	61.4754	62.939	49.4674	49.4669	50.5995	Abr	-0.357979	-0.0162626	-0.349775	8.64393e-39	6.01012e-35	0.547648	1	0.00807756	0.780367	1	-0.333639	2.48433e-34	1.64388e-30	20.5157	NA
ENSMUSG00000017664	Slc35c2	35.8072	36.3681	34.3699	54.399	53.0796	56.1589	41.3893	42.9861	42.7436	56.4262	56.0066	53.0118	Slc35c2	0.620176	0.254956	0.634735	2.77088e-73	2.34555e-69	6.19349e-13	6.98006e-09	0.0150562	0.636896	1	0.380277	5.39424e-30	3.38542e-26	1.49154	NA
ENSMUSG00000017667	Zfp334	61.5346	61.0859	59.4379	45.4607	44.8484	44.4164	53.7245	52.9177	52.5806	41.785	44.0955	40.9203	Zfp334	-0.434766	-0.193442	-0.522395	4.18617e-47	3.10321e-43	7.86772e-11	8.58604e-07	-0.087381	0.00516901	1	-0.328705	9.4286e-27	5.64208e-23	1.69924	NA
ENSMUSG00000017670	Elmo2	126.17	124.486	123.794	95.4224	94.7339	93.8072	112.655	111.514	113.133	88.7415	88.5685	88.1857	Elmo2	-0.399304	-0.150787	-0.496043	1.90888e-69	1.59124e-65	1.63362e-11	1.80287e-07	-0.0969314	3.16905e-05	0.367641	-0.345449	3.25891e-51	2.48264e-47	2.29098	NA
ENSMUSG00000017677	Wsb1	143.699	141.364	145.24	127.86	128.896	128.133	127.936	123.696	127.09	118.455	123.073	122.41	Wsb1	-0.16101	-0.184294	-0.24178	4.52662e-11	1.84188e-07	5.95139e-14	6.78339e-10	-0.080657	0.00102906	1	-0.0573737	0.0200778	1	0.311317	NA
ENSMUSG00000017679	Ttpal	78.2973	75.2008	76.2329	88.3743	90.9362	90.1537	77.1396	74.9823	73.4991	82.1984	83.5158	82.8486	Ttpal	0.230125	-0.0260342	0.113837	5.93394e-18	3.00955e-14	0.340719	1	-0.11639	9.11393e-06	0.107034	0.139769	1.84028e-07	0.000602877	-5.36866	NA
ENSMUSG00000017686	Rhot1	45.4883	45.8724	45.2011	57.2664	57.0663	57.9331	49.5737	47.2567	50.3442	58.9203	59.4509	58.2434	Rhot1	0.335526	0.107906	0.371026	1.8202e-31	1.16456e-27	0.000260731	1	0.0357272	0.193646	1	0.263347	1.01931e-20	5.48085e-17	2.44051	NA
ENSMUSG00000017697	Ada	71.9488	71.0895	74.389	12.0141	11.5972	10.9328	58.9632	61.194	60.1644	12.2717	12.1861	11.5207	Ada	-2.65864	-0.270055	-2.59563	0	0	9.4067e-20	1.11667e-15	0.0600528	0.22834	1	-2.32854	0	0	8.62246	NA
ENSMUSG00000017707	Serinc3	222.414	218.68	223.119	408.872	423.157	430.266	229.011	232.149	228.857	415.574	412.686	413.496	Serinc3	0.926471	0.0550037	0.902713	0	0	0.0235489	1	-0.0237196	0.307643	1	0.847748	5.05074e-279	5.64319e-275	15.4126	NA
ENSMUSG00000017713	Tha1	3.59808	3.69413	3.37132	3.284	3.3316	3.58057	2.77711	3.37587	3.27764	3.37309	3.23382	2.76113	Tha1	-0.0634883	-0.178611	-0.191071	0.517108	1	0.0692954	1	-0.125734	0.206321	1	-0.010606	0.919602	1	0.0593804	NA
ENSMUSG00000017715	Pgs1	88.5116	89.4988	88.1273	70.9141	64.9882	64.8944	86.1943	90.1775	90.1969	66.2178	68.0087	64.1082	Pgs1	-0.406573	0.0023468	-0.424625	1.5859e-33	1.04067e-29	0.94591	1	-0.0178581	0.603845	1	-0.426778	5.8404e-37	3.96563e-33	-181.855	NA
ENSMUSG00000017716	Birc5	108.707	109.306	109.258	21.1286	18.3333	19.097	100.437	104.148	101.43	21.5245	19.4541	20.4763	Birc5	-2.48354	-0.0968851	-2.41411	0	0	0.00200348	1	0.0687125	0.109356	1	-2.31794	0	0	23.9247	NA
ENSMUSG00000017718	Afmid	2.84826	2.8286	3.02246	3.23595	2.33492	2.69349	2.57627	2.9455	2.84043	2.26461	2.64206	2.73098	Afmid	-0.0719352	-0.0574904	-0.191851	0.529594	1	0.629671	1	-0.117328	0.307705	1	-0.13177	0.257324	1	2.29204	NA
ENSMUSG00000017721	Pigt	73.915	76.6655	72.4785	117.32	117.468	115.503	73.0892	78.839	77.333	125.275	123.695	120.947	Pigt	0.651226	0.039635	0.730017	8.33404e-107	7.77732e-103	0.197919	1	0.0787543	0.00588633	1	0.690346	1.1404e-121	1.09649e-117	17.4176	NA
ENSMUSG00000017724	Etv4	109.957	110.122	107.979	128.485	128.415	127.261	105.007	111.563	113.335	128.524	133.224	127.084	Etv4	0.227759	0.00811008	0.244958	1.90761e-15	9.0516e-12	0.781597	1	0.0175005	0.537496	1	0.23715	1.0046e-16	4.89643e-13	29.2414	NA
ENSMUSG00000017734	Dbndd2	1.06534	1.09752	1.21172	2.29086	1.87095	1.77634	0.701727	0.843323	1.09162	1.46404	1.8227	1.66053	Dbndd2	0.83145	-0.367875	0.548349	2.663e-08	9.41369e-05	0.0363842	1	-0.266472	0.0548223	1	0.932923	5.85474e-09	2.12527e-05	-2.53598	NA
ENSMUSG00000017737	Mmp9	47.8544	49.5509	47.4106	0.384655	0.307194	0.272812	39.5315	39.9736	41.8019	0.23239	0.214327	0.213168	Mmp9	-7.37502	-0.255789	-7.77866	0	0	1.95278e-13	2.21386e-09	-0.615773	0.0595162	1	-7.73515	0	0	30.2403	NA
ENSMUSG00000017740	Slc12a5	9.04681	9.35341	9.40159	9.32298	7.98849	8.16633	6.64336	7.91127	7.27972	6.48299	7.55821	6.99769	Slc12a5	-0.125962	-0.349625	-0.404742	0.0818887	1	2.26381e-06	0.0216533	-0.277411	0.000177416	1	-0.0537439	0.486518	1	0.153719	NA
ENSMUSG00000017747	Ghdc	29.1588	27.4298	27.7914	40.511	39.7104	39.0638	24.5185	22.6927	23.9943	38.475	37.7227	37.92	Ghdc	0.499649	-0.245354	0.436	8.27829e-49	6.19134e-45	4.03312e-11	4.42594e-07	-0.0637242	0.0484216	1	0.681281	5.29537e-85	4.65728e-81	-2.77672	NA
ENSMUSG00000017754	Pltp	31.6582	29.6602	32.2435	20.0233	20.8766	21.262	31.23	34.2629	33.1588	23.0486	21.4721	20.6421	Pltp	-0.59036	0.0765574	-0.522461	1.10614e-36	7.52616e-33	0.088966	1	0.0676198	0.160374	1	-0.599299	7.63963e-39	5.28128e-35	-7.8281	NA
ENSMUSG00000017756	Slc12a7	64.9671	64.1818	64.4216	63.3854	60.0563	61.1356	60.8545	59.3897	59.8954	62.2919	62.8953	64.6359	Slc12a7	-0.0683776	-0.103817	-0.0283616	0.0140797	1	0.000220793	1	0.0402412	0.145597	1	0.0756808	0.00670964	1	-0.728982	NA
ENSMUSG00000017760	Ctsa	371.379	376.591	366.948	731.693	740.392	735.061	334.153	354.191	349.609	727.458	709.369	694.812	Ctsa	0.985293	-0.103194	0.934852	0	0	8.06028e-05	0.701002	-0.050221	0.0489533	1	1.03827	0	0	-10.0613	NA
ENSMUSG00000017764	Zswim1	15.9785	15.6618	14.4019	24.909	25.9287	25.6223	15.2629	15.5089	15.2839	24.6806	23.9606	23.6424	Zswim1	0.732677	0.000527443	0.651921	1.60918e-71	1.35428e-67	1	1	-0.0810203	0.0320994	1	0.651132	1.76677e-56	1.38762e-52	1234.51	NA
ENSMUSG00000017765	Slc12a4	87.5119	89.4155	88.0443	356.716	345.192	354.85	88.4035	87.3636	88.7844	347.387	355.513	345.726	Slc12a4	1.99622	-0.00231478	1.98454	0	0	0.934074	1	-0.011257	0.622063	1	1.98727	0	0	-858.514	NA
ENSMUSG00000017774	Myo1c	200.302	202.684	195.675	368.426	360.641	359.435	212.408	209.19	210.73	386.969	395.616	388.966	Myo1c	0.862624	0.0789408	0.968695	3.21602e-306	3.63346e-302	0.000817792	1	0.106098	2.13972e-06	0.0254327	0.889782	0	0	11.2715	NA
ENSMUSG00000017776	Crk	135.601	134.89	132.648	185.446	189.435	187.327	148.004	140.266	140.374	191.83	190.351	196.014	Crk	0.479853	0.0885135	0.520235	1.13692e-77	9.78323e-74	0.000719464	1	0.0405461	0.107342	1	0.431886	3.87774e-64	3.15648e-60	4.87932	NA
ENSMUSG00000017778	Cox7c	64.2339	65.0141	62.777	50.058	53.2858	52.1746	60.9047	65.4314	63.7293	51.746	53.0933	51.1272	Cox7c	-0.304663	-0.0147395	-0.300085	3.7799e-21	2.05929e-17	0.644879	1	0.00444729	0.898616	1	-0.285476	6.40171e-19	3.29496e-15	19.3681	NA
ENSMUSG00000017781	Pitpna	108.924	107.808	108.112	134.46	135.202	134.793	113.208	124.458	123.088	142.996	141.948	139.989	Pitpna	0.316295	0.151338	0.387448	2.00979e-26	1.20286e-22	4.4792e-07	0.00441605	0.0712726	0.0147155	1	0.23623	9.944e-16	4.70252e-12	1.56094	NA
ENSMUSG00000017801	Mlx	31.1917	31.6243	31.4129	55.6164	58.8191	57.7677	33.9916	35.6037	34.2181	59.0897	55.2631	56.6302	Mlx	0.870245	0.139972	0.85908	7.67953e-147	7.70564e-143	0.000113049	0.970982	-0.0101174	0.748861	1	0.720156	5.60575e-104	5.19037e-100	5.14501	NA
ENSMUSG00000017802	Retreg3	69.4161	67.3444	67.1128	104.777	104.941	105.505	66.6622	68.3281	66.672	103.644	106.261	103.383	Retreg3	0.629	-0.015675	0.619873	1.66497e-137	1.65082e-133	0.558345	1	-0.00893931	0.712111	1	0.635736	3.98658e-141	3.97302e-137	-40.5573	NA
ENSMUSG00000017817	Jph2	1.49857	1.86319	1.77654	0.320581	0.238457	0.287847	1.01973	0.843323	0.755314	0.23239	0.229501	0.152861	Jph2	-2.73268	-0.997701	-3.08298	3.57502e-42	2.56257e-38	1.83721e-10	1.99098e-06	-0.537191	0.12749	1	-2.27223	9.34366e-20	4.90533e-16	2.27747	NA
ENSMUSG00000017830	Dhx58	3.19818	2.52899	3.22181	1.82632	2.0256	1.89662	2.77711	3.27655	2.8068	1.41785	1.54958	1.55499	Dhx58	-0.648495	-0.0140379	-0.977064	2.66788e-08	9.4283e-05	0.919463	1	-0.350282	0.00753191	1	-0.984745	4.33308e-16	2.07121e-12	70.1492	NA
ENSMUSG00000017831	Rab5a	59.5184	60.6198	59.9362	82.8479	81.4505	78.6817	63.0135	61.8726	61.6778	84.323	83.3641	85.3815	Rab5a	0.432005	0.0510968	0.490907	1.76876e-57	1.39502e-53	0.0688333	1	0.0591529	0.0228897	1	0.440062	4.85314e-61	3.89707e-57	8.61231	NA
ENSMUSG00000017837	Nkiras2	44.9718	44.6407	43.7226	53.1336	52.4953	51.092	41.7743	43.4	41.8019	49.8677	48.4351	49.0014	Nkiras2	0.232857	-0.0704384	0.143741	1.28902e-15	6.14735e-12	0.0198459	1	-0.0890708	0.00169671	1	0.214225	3.22483e-13	1.40377e-09	-3.04131	NA
ENSMUSG00000017843	Ppp2r5c	107.274	110.538	109.923	91.0013	91.6923	91.0708	107.969	106.747	108.341	94.6688	93.9247	95.0456	Ppp2r5c	-0.259774	-0.0207771	-0.208367	1.79909e-28	1.11292e-24	0.371872	1	0.0512377	0.0303844	1	-0.187759	7.70486e-16	3.65673e-12	9.03683	NA
ENSMUSG00000017858	Ift52	35.0574	36.5346	35.3832	53.0054	54.0247	51.2875	34.8117	38.4673	37.3626	50.1602	51.9857	52.5293	Ift52	0.56535	0.0487475	0.531911	5.49723e-56	4.29718e-52	0.195367	1	-0.0329218	0.335025	1	0.483681	7.80903e-42	5.54207e-38	9.92218	NA
ENSMUSG00000017861	Mybl2	49.804	46.7546	47.2112	11.069	10.7036	11.3688	58.8628	57.7841	61.0388	12.5027	12.0495	11.9428	Mybl2	-2.11862	0.305682	-1.97771	0	0	3.79577e-20	4.51545e-16	0.137792	0.0062557	1	-2.28652	0	0	-7.48006	NA
ENSMUSG00000017929	B4galt5	81.13	79.8281	75.2694	56.4654	53.7669	55.4222	64.6538	66.1928	66.6888	54.7173	57.448	56.7056	B4galt5	-0.511843	-0.258157	-0.483816	1.77649e-57	1.40094e-53	3.86539e-16	4.49429e-12	0.0274617	0.401473	1	-0.226225	2.69832e-12	1.13815e-08	0.87631	NA
ENSMUSG00000017943	Gdap1l1	0.182213	0.231987	0.198371	0.0482663	0.118168	0.0773536	1.13689	1.14127	1.32704	0.0784345	0.108114	0.0925546	Gdap1l1	-1.79486	2.7506	-1.13912	0.000754677	1	4.76485e-31	5.83265e-27	0.327458	0.66512	1	-4.21993	2.65873e-48	1.9874e-44	-1.53419	CBP.dependent
ENSMUSG00000017999	Ddx27	100.292	100.468	97.9286	61.9438	60.8124	60.5191	121.894	124.855	124.955	63.4928	61.6966	61.2587	Ddx27	-0.704961	0.315612	-0.679943	5.189e-161	5.31146e-157	5.1645e-38	6.373e-34	0.024746	0.366245	1	-0.995828	0	0	-3.15523	NA
ENSMUSG00000018001	Cyth3	196.137	193.08	189.579	84.0973	82.7737	79.9297	187.62	186.414	183.741	79.3041	81.1791	78.6573	Cyth3	-1.23039	-0.0533629	-1.27519	0	0	0.0294772	1	-0.0451211	0.0977857	1	-1.22215	0	0	22.9026	NA
ENSMUSG00000018012	Rac3	11.9461	12.2829	11.4449	0.785117	0.891453	0.648694	9.00327	9.23547	9.68434	0.909795	1.01851	1.05746	Rac3	-4.00323	-0.354504	-3.581	0	0	1.98613e-10	2.15059e-06	0.384594	0.022283	1	-3.26424	1.59112e-277	1.77648e-273	9.20793	NA
ENSMUSG00000018040	Rrp7a	56.769	55.0271	56.5141	57.3625	60.4344	59.8877	56.5865	56.6751	55.3048	63.5698	60.5889	54.5798	Rrp7a	0.0781529	0.00221479	0.0839679	0.0574574	1	0.96018	1	0.00846309	0.837109	1	0.0844012	0.0394246	1	38.108	NA
ENSMUSG00000018042	Cyb5r3	471.872	477.975	469.38	402.866	406.093	401.248	385.351	399.959	407.539	444.703	447.159	438.674	Cyb5r3	-0.229905	-0.250714	-0.0931029	4.65054e-22	2.58477e-18	7.25394e-26	8.78162e-22	0.136797	8.98748e-09	0.000109512	0.157606	3.70394e-11	1.48565e-07	-0.628628	NA
ENSMUSG00000018068	Ints2	39.8063	35.9187	38.2738	51.1793	49.7115	48.9721	37.9248	35.703	36.5723	45.9418	48.3592	52.3032	Ints2	0.394802	-0.0489707	0.362136	2.42271e-19	1.26805e-15	0.278518	1	-0.031484	0.463639	1	0.41229	6.64276e-21	3.58842e-17	-8.41911	NA
ENSMUSG00000018076	Med13l	133.018	129.43	135.273	110.368	105.715	108.963	147.201	126.858	130.1	108.017	108.218	115.354	Med13l	-0.291077	0.0231459	-0.262801	5.79184e-12	2.454e-08	0.582929	1	0.0286794	0.498819	1	-0.285544	1.29858e-11	5.31378e-08	-12.3367	NA
ENSMUSG00000018102	Hist1h2bc	10.6964	9.91934	10.8469	109.407	103.962	105.956	8.91959	9.54997	9.41529	113.544	106.003	108.147	Hist1h2bc	3.34719	-0.174619	3.38114	0	0	0.00190456	1	0.0371371	0.237282	1	3.55895	0	0	-20.3813	NA
ENSMUSG00000018126	Baiap2l2	1.73185	1.48036	1.44429	0.464747	0.75398	0.513376	0.818886	0.926086	0.990731	0.494115	0.350887	0.635316	Baiap2l2	-1.48823	-0.787554	-1.69036	1.18932e-16	5.82171e-13	1.33133e-06	0.012862	-0.227026	0.311996	1	-0.927704	5.29083e-06	0.0151212	1.17796	NA
ENSMUSG00000018143	Mafk	33.0412	33.5551	34.0709	100.789	96.6069	94.7093	30.1923	31.747	30.6028	92.8368	90.6169	92.9198	Mafk	1.53757	-0.12144	1.45704	0	0	0.000680638	1	-0.0797395	0.00438532	1	1.57927	0	0	-13.0046	NA
ENSMUSG00000018160	Med1	109.523	108.84	112.896	93.9647	93.6856	92.9352	119.836	110.19	109.669	82.337	83.5613	87.6279	Med1	-0.239652	0.0362651	-0.386156	4.3917e-13	1.94421e-09	0.269988	1	-0.146237	1.18648e-05	0.13908	-0.422155	3.33375e-37	2.26995e-33	-11.6408	NA
ENSMUSG00000018166	Erbb3	1.24863	0.997654	1.11205	8.02548	7.8682	7.62506	1.08668	0.975744	0.889838	8.1919	7.74029	7.78167	Erbb3	2.84116	-0.191196	2.8255	1.62149e-206	1.7324e-202	0.216599	1	0.0125186	0.846883	1	3.04495	2.39309e-226	2.60105e-222	-15.9258	NA
ENSMUSG00000018167	Stard3	28.059	27.1302	27.0937	54.5432	52.2376	51.919	27.6483	28.4364	29.3416	53.8398	53.4119	51.3232	Stard3	0.948354	0.0541152	0.946374	5.95636e-174	6.17317e-170	0.146995	1	-0.00116835	0.973958	1	0.893072	3.16455e-157	3.22024e-153	16.5032	NA
ENSMUSG00000018171	Vmp1	244.059	248.175	257.274	113.363	115.802	118.194	216.241	228.789	222.518	121.765	120.099	119.696	Vmp1	-1.10958	-0.167078	-1.0514	0	0	6.80838e-10	7.29109e-06	0.0576567	0.0437979	1	-0.884843	6.60117e-222	7.15303e-218	5.29598	NA
ENSMUSG00000018189	Uchl5	32.5413	30.9252	32.0442	20.8563	22.1654	20.9463	39.8495	41.2647	43.8702	24.9115	24.0516	23.1147	Uchl5	-0.579962	0.388276	-0.406456	9.2571e-42	6.61142e-38	2.88648e-22	3.46233e-18	0.173232	8.45761e-05	0.966452	-0.795009	5.35459e-85	4.70883e-81	-2.04753	NA
ENSMUSG00000018196	Glrx2	24.9764	25.8485	25.0172	35.7535	37.0296	35.9665	25.0875	27.2447	25.9449	37.1356	35.8261	36.4425	Glrx2	0.519922	0.0458083	0.528622	5.57982e-50	4.20662e-46	0.221307	1	0.00913462	0.79086	1	0.483249	2.11269e-44	1.53001e-40	10.5494	NA
ENSMUSG00000018199	Trove2	77.6641	76.4491	78.9906	100.917	103.498	100.302	87.1483	74.3036	75.2479	90.0348	90.9355	94.1712	Trove2	0.386499	0.0220588	0.239061	1.06004e-19	5.60124e-16	0.609136	1	-0.147188	0.000479492	1	0.217253	3.41617e-07	0.00109625	9.84878	NA
ENSMUSG00000018209	Stk4	52.5867	51.2654	52.6268	90.6809	91.9157	89.1613	57.0719	53.6957	53.7241	85.2929	88.6595	91.3518	Stk4	0.796441	0.0720603	0.761219	5.99414e-142	5.97975e-138	0.0291553	1	-0.0343256	0.250425	1	0.690055	3.74207e-108	3.49248e-104	9.57608	NA
ENSMUSG00000018217	Pmp22	118.571	118.794	118.03	19.6869	19.6393	20.7057	102.663	105.588	106.104	21.894	21.7301	21.3055	Pmp22	-2.56616	-0.177066	-2.45257	0	0	2.72491e-13	3.08378e-09	0.111951	0.00291658	1	-2.27715	0	0	12.8605	NA
ENSMUSG00000018239	Zcchc10	7.98039	8.05511	7.44134	6.9202	6.88871	7.11386	8.04926	9.46721	8.54088	8.02255	6.0864	6.99769	Zcchc10	-0.166349	0.151246	-0.1618	0.04543	1	0.0641925	1	0.0117592	0.893134	1	-0.305839	0.000178006	0.418136	-2.02213	NA
ENSMUSG00000018286	Psmb6	76.8477	76.7321	73.7577	68.255	69.9887	69.5704	69.5912	76.472	76.2064	70.0975	68.8735	68.1036	Psmb6	-0.129652	-0.0324988	-0.134527	9.50038e-05	0.24283	0.327725	1	-0.00512218	0.879662	1	-0.102275	0.00204905	1	3.14705	NA
ENSMUSG00000018287	Spag7	33.3911	33.8048	33.4894	41.0556	42.4942	41.9506	28.7697	30.8697	29.9638	44.2483	39.5891	40.0157	Spag7	0.317933	-0.168318	0.296963	1.16567e-15	5.56606e-12	4.54888e-05	0.402576	-0.0191214	0.62425	1	0.46713	1.8037e-31	1.15239e-27	-2.77529	NA
ENSMUSG00000018293	Pfn1	397.656	398.262	389.01	244.635	240.558	237.184	403.394	443.128	430.66	269.793	263.335	257.452	Pfn1	-0.714086	0.108185	-0.583997	2.01298e-119	1.93126e-115	0.00036347	1	0.130196	2.41911e-05	0.281585	-0.692075	2.96831e-113	2.80238e-109	-6.39717	NA
ENSMUSG00000018322	Tomm34	42.4057	44.2745	41.8454	67.4541	65.1428	66.0521	45.7242	48.8954	47.9228	69.8358	67.1134	64.9073	Tomm34	0.628683	0.149496	0.651048	1.03504e-75	8.85167e-72	2.44057e-05	0.220164	0.0228569	0.483113	1	0.502044	2.51455e-50	1.90477e-46	3.35824	NA
ENSMUSG00000018326	Ywhab	382.376	388.791	391.435	355.21	351.413	352.309	401.034	403.335	402.528	377.67	372.628	379.588	Ywhab	-0.134748	0.0539479	-0.0411545	1.40124e-10	5.57555e-07	0.00998855	1	0.0935625	8.05422e-06	0.0947176	-0.095133	5.29629e-06	0.0151315	-1.76343	NA
ENSMUSG00000018334	Ksr1	96.2432	95.1747	93.4931	15.0095	15.4636	14.1504	78.445	75.9257	73.5664	15.1507	15.509	16.7071	Ksr1	-2.67904	-0.321963	-2.58972	0	0	5.31001e-25	6.41502e-21	0.0884785	0.0591086	1	-2.2686	0	0	7.04614	NA
ENSMUSG00000018340	Anxa6	185.322	187.354	178.565	104.521	104.735	105.144	162.95	163.207	164.572	112.851	116.381	110.454	Anxa6	-0.810221	-0.167786	-0.69851	7.27694e-215	7.83362e-211	3.20755e-11	3.52542e-07	0.111584	2.64831e-05	0.307813	-0.530852	1.01061e-93	9.11877e-90	3.16387	NA
ENSMUSG00000018347	Zkscan6	5.71426	5.37527	6.7104	9.05066	8.50401	10.0157	6.67683	5.80909	6.6071	8.86931	8.54447	9.03304	Zkscan6	0.636048	0.101301	0.577241	1.25863e-15	6.00366e-12	0.231132	1	-0.0624779	0.419859	1	0.472272	2.11785e-09	7.85299e-06	4.66208	NA
ENSMUSG00000018362	Kpna2	292.647	300.59	298.024	111.505	110.853	111.128	277.816	278.148	277.706	120.056	116.305	117.646	Kpna2	-1.41844	-0.096381	-1.3321	0	0	7.6521e-06	0.0712181	0.0861061	0.000322422	1	-1.23596	0	0	12.8236	NA
ENSMUSG00000018363	Smurf2	137.75	139.617	140.14	178.623	175.516	174.035	139.552	129.242	132.891	186.627	185.511	195.276	Smurf2	0.339239	-0.0557863	0.442257	4.99206e-32	3.22088e-28	0.0564095	1	0.103466	0.000261952	1	0.498492	1.93868e-67	1.60096e-63	-8.93573	NA
ENSMUSG00000018372	Cep95	23.2602	21.9703	23.1068	24.5085	23.5229	25.2314	23.146	22.8086	22.9013	25.943	25.751	27.3362	Cep95	0.101907	0.0109045	0.209685	0.010389	1	0.791742	1	0.108212	0.00428216	1	0.199214	2.59177e-07	0.000839474	18.2691	NA
ENSMUSG00000018377	Vezf1	7.91374	7.65563	8.40485	7.48085	7.45578	7.03868	9.25433	9.23547	9.01172	7.12961	7.70994	8.32444	Vezf1	-0.127465	0.198743	-0.0514029	0.0491688	1	0.00137126	1	0.0781888	0.228528	1	-0.248023	5.26042e-05	0.133141	-1.24796	NA
ENSMUSG00000018378	Cuedc1	7.51384	7.20621	6.37815	9.48316	8.53838	8.07612	9.27107	8.70579	9.93657	9.34657	9.65213	8.83704	Cuedc1	0.307279	0.40518	0.402306	3.38529e-05	0.0914028	3.9926e-08	0.000408283	0.0940224	0.188652	1	-0.00388168	0.964463	1	-0.00958015	NA
ENSMUSG00000018379	Srsf1	29.1088	27.4631	28.5888	18.005	19.1066	18.9917	30.2927	28.2709	29.2071	19.2151	19.8789	18.5917	Srsf1	-0.603051	0.0435085	-0.562087	7.6099e-49	5.69297e-45	0.265691	1	0.0402895	0.354811	1	-0.606271	6.36728e-51	4.84359e-47	-13.9346	NA
ENSMUSG00000018395	Kif3a	28.8755	26.9638	28.6719	43.0259	41.824	43.7398	27.3805	27.1619	25.9113	39.799	41.3492	40.8449	Kif3a	0.606798	-0.0709747	0.530081	2.85432e-69	2.37707e-65	0.0570044	1	-0.0766594	0.0192001	1	0.601115	5.55793e-67	4.58029e-63	-8.46942	NA
ENSMUSG00000018398	Sept8	81.6466	79.362	80.2697	106.155	101.023	103.264	90.9476	91.27	90.6509	107.324	105.745	108.132	Sept8	0.364009	0.177584	0.412814	1.98924e-45	1.45911e-41	1.11061e-11	1.22977e-07	0.0489122	0.0490176	1	0.235337	1.19155e-20	6.39506e-17	1.32521	NA
ENSMUSG00000018401	Mtmr4	79.0971	78.8793	79.2564	60.8225	59.8673	60.3838	73.4072	68.3281	67.8996	61.2758	61.6207	62.6609	Mtmr4	-0.389782	-0.178519	-0.3545	7.34348e-40	5.15439e-36	1.01863e-09	1.08667e-05	0.0352306	0.240794	1	-0.176033	2.92042e-09	1.07647e-05	0.986076	NA
ENSMUSG00000018405	Mrm1	6.04751	5.99113	5.94623	11.1971	10.6005	10.7374	7.09526	7.81195	7.801	11.0093	11.2301	10.797	Mrm1	0.858837	0.338046	0.877123	2.62124e-51	1.9945e-47	7.42422e-08	0.000752444	0.021727	0.669619	1	0.542518	8.60883e-24	4.90273e-20	1.60486	NA
ENSMUSG00000018412	Kansl1	106.357	101.2	102.447	191.469	186.583	186.47	99.3161	95.0936	94.199	178.498	178.394	183.682	Kansl1	0.86494	-0.103205	0.80239	1.11454e-222	1.20615e-218	0.000271364	1	-0.0625306	0.017175	1	0.905614	1.04629e-241	1.14663e-237	-8.77492	NA
ENSMUSG00000018415	Gid4	29.492	29.4438	30.0009	38.6048	38.6793	38.3421	37.8578	38.9473	35.8661	39.4449	39.7711	40.9806	Gid4	0.378795	0.341737	0.434402	5.34487e-29	3.33039e-25	1.77984e-23	2.14204e-19	0.0562174	0.0816068	1	0.0932755	0.00404764	1	0.272946	NA
ENSMUSG00000018417	Myo1b	121.821	120.841	120.156	60.3739	57.7193	57.1212	126.731	118.201	122.651	57.6117	59.1778	58.9671	Myo1b	-1.05061	0.0187876	-1.04574	2.7242e-275	3.03639e-271	0.506808	1	0.00461272	0.888004	1	-1.06478	4.9479e-286	5.54461e-282	-56.6747	NA
ENSMUSG00000018425	Dhx40	34.041	32.9226	33.5393	47.3829	47.426	48.0399	30.4768	29.231	29.1567	31.2391	31.6079	31.6029	Dhx40	0.507898	-0.17775	-0.089504	1.97874e-68	1.64216e-64	2.43382e-08	0.000250538	-0.597548	2.61698e-95	3.30132e-91	0.0881014	0.00559673	1	-0.495649	NA
ENSMUSG00000018427	Ypel2	17.4449	15.5786	15.9136	17.3803	16.2712	16.5109	14.9114	14.2675	14.0059	17.3985	16.5105	17.4911	Ypel2	0.0360751	-0.180718	0.0721092	0.467907	1	0.00032908	1	0.0349032	0.469623	1	0.251697	3.29338e-07	0.00105915	-1.39276	NA
ENSMUSG00000018428	Akap1	39.7063	39.6139	38.7057	35.2569	35.8439	34.9742	44.8706	45.6842	46.5775	33.4406	33.6108	33.8191	Akap1	-0.154678	0.216604	-0.226519	2.35063e-07	0.000777589	5.20303e-14	5.93405e-10	-0.0720571	0.016877	1	-0.44334	1.12984e-52	8.68286e-49	-2.04678	NA
ENSMUSG00000018433	Nol11	79.947	81.5591	84.4726	69.4244	71.3291	70.7732	91.3493	92.528	91.6935	71.6986	72.4544	74.9182	Nol11	-0.217909	0.163945	-0.167012	4.83837e-15	2.27113e-11	1.77283e-09	1.8808e-05	0.0507733	0.0697368	1	-0.331081	7.03825e-34	4.6368e-30	-2.01946	NA
ENSMUSG00000018442	Derl2	27.4925	27.2467	30.0341	39.5979	40.2259	40.7478	30.0082	31.9456	29.8125	40.2147	41.0912	40.287	Derl2	0.508798	0.114583	0.521716	2.076e-42	1.49119e-38	0.0032139	1	0.0120236	0.736611	1	0.406239	1.82773e-28	1.12277e-24	3.54536	NA
ENSMUSG00000018446	C1qbp	113.039	115.365	116.335	52.0603	50.8972	50.5808	130.346	143.692	141.383	51.3149	50.8628	51.1423	C1qbp	-1.16744	0.269157	-1.16886	1.03063e-268	1.14441e-264	1.39755e-17	1.64073e-13	-0.00200584	0.957204	1	-1.4386	0	0	-5.34485	NA
ENSMUSG00000018449	Rpain	10.7464	9.48657	9.11918	11.5816	11.494	11.3839	8.63506	8.47405	8.87719	11.3172	11.2605	10.993	Rpain	0.231981	-0.176338	0.197195	3.49393e-05	0.0941963	0.00301342	1	-0.0376903	0.490851	1	0.370631	7.83397e-11	3.1093e-07	-2.10182	NA
ENSMUSG00000018470	Kcnab3	1.28196	1.03094	0.796414	2.2428	2.43802	1.85152	0.634779	0.959191	0.856207	2.06446	1.68614	1.69069	Kcnab3	1.08954	-0.354535	0.827731	3.91368e-11	1.59756e-07	0.0688325	1	-0.264135	0.0799407	1	1.18002	1.63404e-11	6.65707e-08	-3.32835	NA
ENSMUSG00000018474	Chd3	191.104	187.554	190.443	116.983	116.128	114.21	170.18	153.938	160.183	111.681	112.785	117.962	Chd3	-0.712654	-0.232853	-0.733246	1.25219e-111	1.18131e-107	1.09475e-13	1.24462e-09	-0.0203359	0.5278	1	-0.500137	1.3611e-55	1.06356e-51	2.14787	NA
ENSMUSG00000018476	Kdm6b	28.5256	28.6615	28.8048	43.0419	41.2226	41.5146	32.4351	30.3731	31.4099	39.291	40.7878	42.0812	Kdm6b	0.549226	0.131832	0.505942	6.23785e-56	4.87363e-52	0.000312902	1	-0.0421151	0.203259	1	0.37528	1.09304e-27	6.64568e-24	2.84665	NA
ENSMUSG00000018481	Appbp2	51.2703	53.2461	52.6767	78.6991	79.3025	78.0653	55.0133	50.2527	52.2948	80.5973	80.9818	83.1953	Appbp2	0.586765	0.00327093	0.638956	1.06366e-81	9.2602e-78	0.921218	1	0.0524862	0.0740308	1	0.635981	5.6322e-97	5.1253e-93	194.434	NA
ENSMUSG00000018500	Adora2b	7.13059	7.02312	7.04264	1.31373	1.47571	1.44556	5.82325	6.73604	5.86722	1.37166	1.50406	1.359	Adora2b	-2.34909	-0.202516	-2.32497	7.30867e-135	7.21731e-131	0.00451829	1	0.000667019	1	1	-2.14595	7.51175e-110	7.04527e-106	10.5964	NA
ENSMUSG00000018501	Ncor1	156.512	153.266	157.816	248.367	235.97	239.379	173.879	157.911	157.946	240.958	234.839	249.31	Ncor1	0.630307	0.0667488	0.632614	3.7845e-75	3.22931e-71	0.0543315	1	0.00273779	0.935897	1	0.566297	2.46344e-61	1.98159e-57	8.48399	NA
ENSMUSG00000018537	Pcgf2	63.5008	63.799	63.1424	53.9025	52.1688	54.8057	61.9926	64.7031	65.4949	52.3926	52.8961	51.0518	Pcgf2	-0.24278	0.0131945	-0.284811	1.49325e-16	7.28855e-13	0.652282	1	-0.0420754	0.163391	1	-0.29805	3.04374e-24	1.7465e-20	-22.5889	NA
ENSMUSG00000018541	Cwc25	33.8744	34.2875	34.2868	55.2961	56.6367	56.189	29.2718	31.4159	31.3763	52.5312	49.8614	53.5545	Cwc25	0.714987	-0.154299	0.605524	3.33645e-101	3.07054e-97	2.21305e-05	0.200325	-0.108391	0.000639104	1	0.760896	9.81998e-111	9.22685e-107	-4.93132	NA
ENSMUSG00000018547	Pip4k2b	139.75	139.866	141.004	154.467	153.005	153.572	142.447	131.658	134.909	159.684	158.912	160.418	Pip4k2b	0.132439	-0.0404138	0.187552	5.73401e-07	0.00183775	0.131017	1	0.0551503	0.0351909	1	0.228004	5.91613e-18	2.97522e-14	-5.64172	NA
ENSMUSG00000018548	Trim37	54.7028	58.1564	58.3082	64.1703	64.1118	62.8797	68.2355	66.0108	66.588	63.2927	63.927	64.0932	Trim37	0.159186	0.230663	0.161128	4.21215e-08	0.000146962	1.85313e-15	2.1437e-11	0.00142929	0.967281	1	-0.0700486	0.0137068	1	-0.303683	NA
ENSMUSG00000018559	Ctdnep1	78.414	78.4632	77.7779	73.7814	70.0403	70.683	81.7924	84.3344	85.7408	76.81	76.703	74.4509	Ctdnep1	-0.129446	0.102157	-0.0418739	4.46841e-06	0.0132712	0.000252446	1	0.0876463	0.00178308	1	-0.143957	2.14153e-07	0.000698354	-1.40918	NA
ENSMUSG00000018565	Elp5	32.5913	31.4912	30.3829	32.8542	31.6166	31.8469	32.2677	34.1802	36.0174	33.025	32.6852	31.0601	Elp5	0.0281776	0.117357	0.0348534	0.495595	1	0.0040797	1	0.00654083	0.873772	1	-0.0826391	0.0409924	1	-0.704167	NA
ENSMUSG00000018567	Gabarap	132.385	131.943	129.426	173.977	175.035	176.155	119.618	126.56	126.771	184.841	180.352	177.033	Gabarap	0.415608	-0.0783175	0.461445	2.66202e-55	2.07212e-51	0.00386756	1	0.0460474	0.0763565	1	0.539973	3.50681e-92	3.15122e-88	-6.89467	NA
ENSMUSG00000018570	2810408A11Rik	2.2484	2.21273	2.37458	0.464747	0.307194	0.423165	1.77289	2.10132	1.69698	0.355555	0.350887	0.499626	2810408A11Rik	-2.60077	-0.298799	-2.52209	2.43029e-54	1.88153e-50	0.0130916	1	0.00612156	1	1	-2.296	3.2777e-40	2.28718e-36	7.6841	NA
ENSMUSG00000018572	Phf23	52.47	51.2321	51.5636	44.1472	40.6383	43.6195	50.9629	52.9673	54.4304	42.8935	43.5948	41.5384	Phf23	-0.273246	0.0284748	-0.278511	2.7853e-15	1.31578e-11	0.4057	1	-0.00527169	0.895667	1	-0.306992	4.65534e-19	2.40681e-15	-10.7812	NA
ENSMUSG00000018574	Acadvl	22.7436	23.1188	23.8875	58.6119	57.4272	57.5572	21.6062	20.2264	20.564	59.0435	58.2219	58.4846	Acadvl	1.31662	-0.161067	1.33354	0	0	1.62346e-05	0.148206	0.0177174	0.507951	1	1.4954	0	0	-9.28434	NA
ENSMUSG00000018583	G3bp1	255.373	258.628	259.467	127.171	120.974	122.555	282.536	284.753	277.185	130.094	128.656	130.943	G3bp1	-1.06114	0.126739	-0.989004	0	0	5.85535e-08	0.000595899	0.0719771	0.0041722	1	-1.1159	0	0	-8.80472	NA
ENSMUSG00000018585	Atox1	34.3409	34.1377	33.1572	35.7055	37.2358	37.6806	30.5103	32.4091	31.3763	40.2917	41.4099	39.1412	Atox1	0.122524	-0.108133	0.249509	0.000394645	0.923074	0.00232139	1	0.127375	0.000133529	1	0.358032	1.28146e-25	7.53244e-22	-3.31103	NA
ENSMUSG00000018593	Sparc	819.808	820.561	802.573	505.256	505.004	510.254	794.905	812.697	817.013	613.9	609.65	607.397	Sparc	-0.684061	-0.0108629	-0.415968	1.02974e-221	1.11325e-217	0.61015	1	0.268011	1.60803e-35	2.02306e-31	-0.405187	4.4953e-80	3.89518e-76	37.3001	NA
ENSMUSG00000018599	Mief2	7.09727	8.388	6.99281	10.22	10.0506	10.166	6.9781	7.4809	8.03642	9.99318	9.69765	9.56072	Mief2	0.439053	0.00102707	0.384745	2.1375e-11	8.8407e-08	1	1	-0.0578163	0.36012	1	0.380212	6.61214e-09	2.39161e-05	370.191	NA
ENSMUSG00000018604	Tbx3	31.6415	31.6909	31.5624	29.7786	28.008	27.652	30.2592	30.6876	30.4515	28.745	28.3912	28.1805	Tbx3	-0.151828	-0.0541869	-0.15355	6.05634e-06	0.0177754	0.105494	1	-0.00189868	0.959074	1	-0.0995393	0.00298701	1	1.83696	NA
ENSMUSG00000018648	Dusp14	9.58002	9.85276	9.48465	20.2476	19.8283	19.6984	9.15391	10.4769	9.41529	20.5699	20.7286	20.5667	Dusp14	1.0498	0.00685273	1.09737	1.59407e-117	1.52313e-113	0.913926	1	0.0498175	0.211078	1	1.09277	3.68524e-131	3.61154e-127	159.465	NA
ENSMUSG00000018651	Tada2a	21.294	23.1021	22.0269	14.0965	13.4359	14.827	24.5854	24.9439	25.1546	14.7504	13.5668	14.7622	Tada2a	-0.648087	0.169316	-0.624998	7.07003e-45	5.17102e-41	8.48389e-05	0.736741	0.022261	0.641129	1	-0.795144	2.60577e-70	2.17295e-66	-4.69623	NA
ENSMUSG00000018659	Pnpo	8.04705	8.12169	7.2586	24.4605	24.7086	26.359	8.8359	9.51687	10.0879	26.6204	25.5993	24.6073	Pnpo	1.69357	0.280725	1.71452	9.33421e-223	1.01024e-218	9.17088e-06	0.0848948	0.0236362	0.606671	1	1.43649	9.94353e-170	1.02756e-165	5.11706	NA
ENSMUSG00000018661	Cog1	42.9722	44.108	43.191	76.5686	72.9788	72.5925	43.9836	41.3474	40.5744	73.4229	73.4559	74.8429	Cog1	0.770331	-0.0492159	0.767265	3.84688e-130	3.76494e-126	0.148197	1	-0.00265985	0.931239	1	0.816888	3.59229e-146	3.60307e-142	-16.5981	NA
ENSMUSG00000018666	Cbx1	119.171	119.177	120.837	97.9373	97.4146	100.002	128.572	126.097	126.771	101.905	99.0836	101.679	Cbx1	-0.282045	0.0867326	-0.247077	3.82934e-32	2.47414e-28	0.000220162	1	0.0349646	0.145714	1	-0.333813	2.39465e-45	1.74857e-41	-3.84876	NA
ENSMUSG00000018669	Cdk5rap3	46.0882	46.7379	45.7992	44.5316	41.9443	42.2964	42.3434	46.8429	45.5518	42.678	45.2184	42.5184	Cdk5rap3	-0.106315	-0.0409866	-0.088608	0.00476616	1	0.277415	1	0.0181958	0.630231	1	-0.0471326	0.210943	1	1.14995	NA
ENSMUSG00000018672	Copz2	73.7651	75.1508	71.4486	64.5067	62.7371	62.9248	72.8381	76.2071	75.2479	71.283	70.4667	67.8623	Copz2	-0.212647	0.0255469	-0.0721737	7.01278e-13	3.08282e-09	0.385147	1	0.140374	1.98286e-06	0.0235821	-0.0978193	0.00081268	1	-3.829	NA
ENSMUSG00000018677	Slc25a39	227.912	228.65	217.039	302.045	299.259	298.407	236.928	257.193	256.468	320.476	314.454	304.672	Slc25a39	0.417614	0.15616	0.480248	2.91407e-40	2.05442e-36	7.55381e-07	0.00738082	0.0625812	0.0444665	1	0.324035	3.97799e-25	2.31718e-21	2.07503	NA
ENSMUSG00000018678	Sp2	21.5106	21.5209	19.967	24.7328	23.6776	24.4345	20.2171	20.7726	19.9586	25.4811	25.66	25.7983	Sp2	0.210517	-0.0476454	0.289275	4.12315e-08	0.000143898	0.233631	1	0.0783486	0.0315515	1	0.336512	5.88372e-19	3.03129e-15	-7.06284	NA
ENSMUSG00000018697	Aatf	26.7094	29.1276	26.4458	17.9409	19.6393	17.8791	31.6317	35.2395	33.4614	19.523	17.9671	18.3504	Aatf	-0.571251	0.286507	-0.558807	1.06766e-28	6.62907e-25	4.83353e-09	5.06602e-05	0.0110696	0.848844	1	-0.846691	4.10829e-64	3.34333e-60	-2.95522	NA
ENSMUSG00000018707	Dync1h1	423.484	410.113	423.38	634.894	594.31	590.633	449.889	378.904	394.339	580.276	588.711	626.047	Dync1h1	0.533881	-0.0393901	0.513429	3.04866e-30	1.9295e-26	0.399351	1	-0.0197915	0.670496	1	0.55348	2.29952e-32	1.4871e-28	-14.0512	NA
ENSMUSG00000018727	Cpsf4l	1.99846	1.84655	2.07556	2.70734	2.74734	2.55817	1.80637	2.002	2.18463	2.46475	1.89856	2.08268	Cpsf4l	0.440627	0.0176132	0.115858	0.000100263	0.256071	0.890999	1	-0.317088	0.00364748	1	0.10594	0.379905	1	6.01479	NA
ENSMUSG00000018733	Pex12	4.19794	3.86058	4.20194	4.64558	4.68914	4.69318	3.98218	4.35247	4.48835	4.62013	4.15939	4.44972	Pex12	0.195646	0.0651662	0.109488	0.0123951	1	0.437342	1	-0.0854209	0.264229	1	0.0450606	0.578358	1	0.691473	NA
ENSMUSG00000018736	Ndel1	54.9028	55.1103	55.1519	94.5254	92.5687	92.5593	57.0719	58.8932	56.3473	91.9438	91.4363	92.6032	Ndel1	0.760063	0.061246	0.740656	2.50332e-194	2.64276e-190	0.0257952	1	-0.0190646	0.427719	1	0.679753	2.85518e-158	2.90858e-154	11.0987	NA
ENSMUSG00000018740	Slc25a35	2.44835	2.51234	2.29152	5.95909	5.03282	5.32466	2.20806	2.13442	2.42005	4.58934	4.69045	4.52511	Slc25a35	1.18131	-0.102524	0.929605	3.05417e-39	2.13212e-35	0.367764	1	-0.243968	0.00184929	1	1.03989	1.16337e-28	7.16637e-25	-10.1429	NA
ENSMUSG00000018750	Zbtb4	22.0938	22.3864	23.4058	35.305	33.7646	35.726	22.3761	20.7395	21.1189	39.9992	37.2069	40.272	Zbtb4	0.627811	-0.0799728	0.790729	1.91042e-52	1.46377e-48	0.0710176	1	0.164162	1.90017e-05	0.221655	0.871946	5.60157e-102	5.16521e-98	-10.903	NA
ENSMUSG00000018752	Tnfsfm13	1.082	0.981009	0.796414	1.24965	1.09766	1.32528	0.601305	0.677798	0.603974	1.27929	1.12473	0.951927	Tnfsfm13	0.376758	-0.6266	0.232068	0.0219195	1	0.00090399	1	-0.139858	0.383303	1	0.863602	1.59975e-06	0.00482804	-1.37824	NA
ENSMUSG00000018761	Mpdu1	16.8283	17.2764	16.3289	28.1287	27.0628	27.5468	13.8737	15.6082	16.3937	27.3902	27.4808	26.9894	Mpdu1	0.715477	-0.136931	0.699116	3.89543e-58	3.08362e-54	0.00514168	1	-0.0157136	0.712682	1	0.836697	1.18306e-77	1.01661e-73	-6.11035	NA
ENSMUSG00000018765	Fxr2	114.539	114.416	110.255	183.316	173.781	171.991	105.944	109.958	106.962	178.436	183.978	182.988	Fxr2	0.641434	-0.0712338	0.68524	1.48e-112	1.3989e-108	0.0149305	1	0.0438837	0.113607	1	0.756552	7.18237e-156	7.2901e-152	-10.6207	NA
ENSMUSG00000018770	Atp5g3	215.632	222.958	215.643	201.897	210.022	201.505	205.06	223.26	219.979	215.478	215.721	212.207	Atp5g3	-0.093099	-0.0131302	-0.0239382	0.00189831	1	0.661473	1	0.069012	0.0211034	1	-0.0109569	0.714835	1	0.834481	NA
ENSMUSG00000018774	Cd68	1.34861	1.19739	1.19511	19.7991	20.1033	19.0519	0.885834	1.19093	0.9571	18.4454	16.5105	17.7775	Cd68	4.01052	-0.309553	3.81799	0	0	0.0404187	1	-0.160513	0.00144474	1	4.15964	0	0	-13.4376	NA
ENSMUSG00000018796	Acsl1	76.9643	77.1982	78.5587	37.5796	38.8168	38.5225	71.4657	69.6689	70.3883	38.7213	38.6635	38.5683	Acsl1	-1.01875	-0.137884	-1.005	0	0	2.78966e-08	0.000286331	0.0131017	0.663138	1	-0.867764	1.04928e-230	1.1434e-226	6.29344	NA
ENSMUSG00000018800	Abca5	89.8446	87.8676	91.7654	145.753	147.867	146.927	97.8599	90.8396	89.2048	132.357	133.861	138.572	Abca5	0.709275	0.0444275	0.586959	1.85459e-114	1.76037e-110	0.165903	1	-0.122073	5.9893e-05	0.68829	0.542775	7.74202e-68	6.40498e-64	12.2171	NA
ENSMUSG00000018809	Smyd4	13.9457	13.3815	13.1892	10.5884	10.7723	11.0681	15.2964	15.3434	14.1236	9.91621	10.5322	10.9779	Smyd4	-0.321396	0.144324	-0.367381	6.98962e-10	2.6917e-06	0.00383937	1	-0.0456758	0.403279	1	-0.511398	1.066e-23	6.06338e-20	-3.54341	NA
ENSMUSG00000018819	Lsp1	17.0783	16.7271	15.9468	0.528821	0.633692	0.633659	18.9116	20.1105	20.833	0.678862	0.760567	0.590086	Lsp1	-4.86387	0.267156	-4.62269	0	0	1.49748e-07	0.00150242	0.184681	0.367702	1	-4.94649	0	0	-18.5154	NA
ENSMUSG00000018820	Zfyve27	28.0424	26.0649	28.0074	86.4841	82.2582	82.8315	26.8951	24.5631	24.5829	78.3803	78.1596	77.5416	Zfyve27	1.61642	-0.111047	1.51212	0	0	0.00556106	1	-0.104101	0.000917682	1	1.62336	0	0	-14.6187	NA
ENSMUSG00000018821	Avpi1	30.8084	30.3094	29.3364	27.4399	27.7674	26.344	30.0082	34.0643	35.6811	29.6379	28.7705	28.9494	Avpi1	-0.150204	0.141318	-0.0500707	0.00195773	1	0.00308966	1	0.0998691	0.0389798	1	-0.191654	5.52891e-05	0.139329	-1.35619	NA
ENSMUSG00000018841	Rad51d	12.4294	12.6824	12.5413	16.0988	16.2884	15.7742	12.4511	12.3308	12.4084	16.3362	15.8428	15.0034	Rad51d	0.355073	-0.0179115	0.324641	2.35472e-15	1.11449e-11	0.717281	1	-0.0292082	0.492256	1	0.343777	1.58628e-14	7.23978e-11	-19.1931	NA
ENSMUSG00000018846	Pank3	98.5093	98.1208	101.799	139.954	137.058	139.139	105.04	92.379	94.5017	143.427	138.307	147.03	Pank3	0.479897	-0.0318618	0.522535	1.34365e-38	9.33033e-35	0.39625	1	0.0430306	0.23668	1	0.55479	4.06843e-51	3.0977e-47	-17.4124	NA
ENSMUSG00000018848	Rars	137.983	138.635	138.645	132.345	135.512	131.441	173.093	179.528	175.384	141.995	139.111	141.798	Rars	-0.0568657	0.346619	0.0262443	0.0183046	1	9.87617e-49	1.22909e-44	0.0831655	0.000499803	1	-0.32032	1.8306e-42	1.30668e-38	-0.924126	NA
ENSMUSG00000018849	Wwc1	40.4895	43.1926	38.3735	57.8911	54.5574	52.2798	46.8456	45.287	45.619	50.4681	52.1981	52.2278	Wwc1	0.43253	0.174653	0.34525	1.37504e-26	8.25849e-23	2.26844e-05	0.205113	-0.0884919	0.025365	1	0.169386	2.57225e-05	0.067676	0.969844	NA
ENSMUSG00000018858	Mrpl58	22.0771	22.8025	23.5885	19.2224	18.3677	18.4505	22.0749	24.4307	23.8262	18.2914	18.043	18.2751	Mrpl58	-0.289301	0.0388719	-0.325784	2.44187e-11	1.00678e-07	0.361303	1	-0.0375074	0.402064	1	-0.365681	1.76212e-17	8.74187e-14	-9.40736	NA
ENSMUSG00000018861	Fdxr	11.2796	11.2343	11.4615	4.75771	4.67196	5.18935	13.0034	12.695	13.0306	5.20516	4.43251	4.17834	Fdxr	-1.21893	0.189312	-1.3044	9.57577e-83	8.36156e-79	0.000382183	1	-0.0858745	0.263459	1	-1.49413	1.69357e-128	1.64987e-124	-7.8924	NA
ENSMUSG00000018882	Mrpl45	73.3318	75.1175	71.0997	66.445	66.3973	67.4805	73.8089	79.4183	80.2253	66.926	66.0058	65.2088	Mrpl45	-0.1321	0.0886418	-0.147735	3.5718e-05	0.0961887	0.00518747	1	-0.0160155	0.621356	1	-0.236758	8.32944e-14	3.7016e-10	-2.67095	NA
ENSMUSG00000018899	Irf1	42.7556	43.2924	43.5731	43.0419	43.6111	43.0181	35.8494	36.9941	36.7405	34.9494	34.1418	32.5376	Irf1	0.000292105	-0.242422	-0.351583	0.99362	1	6.20914e-15	7.15044e-11	-0.351782	3.22957e-30	4.05827e-26	-0.109067	0.000632236	1	0.449906	NA
ENSMUSG00000018900	Slc22a5	7.0806	7.48918	7.80681	16.0187	15.876	15.8644	7.91537	7.54711	7.51514	15.1815	15.7821	15.1542	Slc22a5	1.09682	0.0382971	1.04423	5.76591e-112	5.44071e-108	0.525164	1	-0.0505019	0.232751	1	1.00803	1.56176e-95	1.41699e-91	26.3213	NA
ENSMUSG00000018906	P4ha2	78.3973	79.7781	78.8244	50.2823	46.7902	49.5735	82.8469	83.6061	82.9831	54.3478	56.4314	56.0422	P4ha2	-0.691954	0.0738232	-0.506735	3.97136e-129	3.88201e-125	0.00687547	1	0.185223	3.56228e-10	4.37448e-06	-0.580555	8.08784e-96	7.34214e-92	-7.86413	NA
ENSMUSG00000018909	Arrb1	24.01	23.3019	23.738	16.1949	16.4431	15.7291	17.5391	14.7806	14.8635	15.3201	16.3284	16.0739	Arrb1	-0.556345	-0.591584	-0.574587	6.85333e-27	4.13941e-23	8.14231e-30	9.95235e-26	-0.0185869	0.729917	1	0.0166537	0.766499	1	-0.0281511	NA
ENSMUSG00000018920	Cxcl16	2.13176	2.1628	1.97589	2.0666	3.02228	2.19733	1.5051	1.42266	1.54564	2.17223	2.2779	2.08268	Cxcl16	0.212778	-0.495906	0.0592923	0.0970496	1	0.000482854	1	-0.152831	0.223726	1	0.555886	5.84531e-05	0.147009	-1.12095	NA
ENSMUSG00000018921	Pelp1	61.3513	61.1691	58.8897	53.6942	52.6672	53.1368	61.8085	60.6974	61.3247	56.8727	55.1114	53.7053	Pelp1	-0.185651	0.0191225	-0.13092	1.34028e-10	5.34101e-07	0.505922	1	0.0546871	0.0585697	1	-0.150086	1.52872e-07	0.000504305	-7.84866	NA
ENSMUSG00000018923	Med11	10.7464	11.7003	10.3817	10.3482	9.65535	10.1209	8.90285	10.6259	9.90294	10.3935	10.6687	10.0281	Med11	-0.123498	-0.157776	-0.0771123	0.050199	1	0.0132826	1	0.0447497	0.477777	1	0.0790281	0.214663	1	-0.500888	NA
ENSMUSG00000018931	Natd1	20.0109	20.7053	19.4853	50.3143	48.8695	47.9346	17.74	17.5449	18.3779	49.7292	51.227	49.3934	Natd1	1.29013	-0.166243	1.32072	0	0	5.41373e-05	0.476679	0.0316478	0.296657	1	1.48802	0	0	-8.95088	NA
ENSMUSG00000018932	Map2k3	119.404	119.876	115.322	76.9691	73.9583	75.2988	114.396	119.773	120.566	81.7519	80.0714	77.5717	Map2k3	-0.648438	0.000555267	-0.566924	1.52954e-108	1.43318e-104	0.986541	1	0.081384	0.00656932	1	-0.56761	7.38726e-85	6.49266e-81	-1022.23	NA
ENSMUSG00000018965	Ywhah	190.921	194.728	193.15	150.013	152.008	148.821	192.005	202.238	197.278	175.804	171.946	172.615	Ywhah	-0.360667	0.0313982	-0.153561	1.15166e-48	8.60637e-45	0.196797	1	0.207077	4.1975e-17	5.23932e-13	-0.184988	2.77994e-14	1.25681e-10	-5.89169	NA
ENSMUSG00000018974	Sart3	76.4478	74.8013	75.1697	69.4564	65.8989	61.2408	76.0182	77.7796	74.508	67.0492	67.7962	66.5808	Sart3	-0.204433	0.012023	-0.168719	5.79837e-09	2.12742e-05	0.732387	1	0.0356178	0.315909	1	-0.180838	2.1488e-07	0.000700509	-15.0411	NA
ENSMUSG00000018983	E2f2	6.38077	6.54042	5.82994	2.83549	2.6786	2.2725	6.99483	7.39814	7.38062	2.40317	2.45998	2.4596	E2f2	-1.28213	0.216675	-1.35486	1.17539e-52	9.01286e-49	0.00168777	1	-0.0852002	0.396549	1	-1.58402	2.52283e-84	2.21328e-80	-7.31059	NA
ENSMUSG00000018995	Nars2	6.98063	6.49048	7.2586	6.29548	7.5417	6.85826	9.6058	9.81481	9.11261	6.49839	6.87541	6.71123	Nars2	-0.00468748	0.462807	-0.0444234	0.972195	1	2.51566e-12	2.81075e-08	-0.0409809	0.549941	1	-0.50848	7.29794e-15	3.36362e-11	-1.09869	NA
ENSMUSG00000018999	Slc35b4	87.3452	88.4168	88.6589	69.3763	68.7687	68.969	87.1483	85.129	83.1344	66.9876	69.086	66.0531	Slc35b4	-0.352508	-0.0500132	-0.387801	5.50889e-40	3.87385e-36	0.0566113	1	-0.0352336	0.196106	1	-0.337729	8.67947e-37	5.88381e-33	6.75279	NA
ENSMUSG00000019039	Dalrd3	11.7295	13.1318	12.8071	28.2408	26.7535	26.1936	12.3507	13.6716	12.6102	27.1592	27.6932	26.0094	Dalrd3	1.10949	0.0367426	1.10328	1.04562e-116	9.97001e-113	0.507204	1	-0.00563201	0.90132	1	1.06712	1.46412e-109	1.37174e-105	29.0431	NA
ENSMUSG00000019054	Fis1	110.806	111.47	105.819	125.97	130.975	126.329	92.9393	102.873	100.992	135.713	131.585	125.44	Fis1	0.224156	-0.14461	0.259085	5.77706e-10	2.23457e-06	7.7782e-05	0.67717	0.0353178	0.325853	1	0.404084	7.3228e-29	4.52549e-25	-2.79431	NA
ENSMUSG00000019055	Plod1	67.2999	68.9589	66.116	60.9506	58.8878	61.9325	72.7545	76.4389	75.5506	68.8966	69.177	69.958	Plod1	-0.154285	0.151358	0.039958	1.21836e-07	0.00041156	1.37272e-07	0.00137944	0.194111	1.67933e-11	2.07163e-07	-0.111533	8.62489e-05	0.211396	-0.736881	NA
ENSMUSG00000019066	Rab3d	15.1954	14.9295	14.5182	20.7442	20.6016	20.6757	12.4009	12.6287	12.7952	22.6945	23.3233	21.999	Rab3d	0.475272	-0.239622	0.607299	8.62463e-32	5.53615e-28	1.2014e-07	0.00120957	0.133149	0.000304415	1	0.848047	2.54301e-97	2.31643e-93	-3.53909	NA
ENSMUSG00000019080	Mfsd3	5.68093	5.30869	5.19868	7.27261	7.14647	7.23414	5.1705	5.42838	5.36276	7.37594	7.20922	6.62077	Mfsd3	0.422061	-0.0203244	0.389013	1.34314e-10	5.35108e-07	0.789368	1	-0.0309819	0.627252	1	0.411408	3.46782e-10	1.33788e-06	-20.242	NA
ENSMUSG00000019082	Slc25a22	22.9269	22.686	22.0768	22.5222	20.7735	21.8334	26.5771	28.784	27.3742	20.924	22.1701	20.8833	Slc25a22	-0.0547789	0.290064	-0.0817486	0.198513	1	3.00163e-12	3.3503e-08	-0.0266519	0.542714	1	-0.371496	2.53566e-19	1.31753e-15	-1.28074	NA
ENSMUSG00000019087	Atp6ap1	203.701	208.71	202.32	450.392	458.814	456.804	212.224	218.427	218.28	459.144	451.211	446.8	Atp6ap1	1.15204	0.0781272	1.14259	0	0	0.00116998	1	-0.00938037	0.680294	1	1.06453	0	0	13.6256	NA
ENSMUSG00000019088	Dnase1l1	6.9473	7.07305	7.02603	7.3527	7.16365	6.57259	6.15799	6.5043	6.9266	8.96168	7.72512	7.55552	Dnase1l1	0.00132694	-0.104105	0.199787	0.988966	1	0.166493	1	0.202912	0.00436087	1	0.308344	1.85887e-05	0.0497718	-2.96187	NA
ENSMUSG00000019122	Ccl9	13.979	13.7976	15.3488	0.0322478	0.066616	0.0623183	10.6937	10.0134	10.9455	0.0784345	0.0777677	0.0473245	Ccl9	-9.25882	-0.44754	-7.7633	0	0	3.13523e-13	3.54658e-09	0.683012	0.549337	1	-8.1323	0	0	18.1711	NA
ENSMUSG00000019124	Scrn1	1.18198	1.28062	1.44429	15.2819	15.3433	14.9623	0.601305	0.843323	0.856207	14.8428	15.0386	14.2345	Scrn1	3.57479	-0.787813	3.50173	0	0	5.00952e-07	0.00492687	-0.0469625	0.293683	1	4.31577	0	0	-5.47816	NA
ENSMUSG00000019132	BC005537	136.35	137.536	138.695	174.33	171.238	170.457	145.979	142.748	142.863	161.824	162.645	169.329	BC005537	0.322793	0.0649862	0.258976	1.9312e-39	1.35165e-35	0.00909309	1	-0.0634595	0.00865797	1	0.194348	2.12089e-15	9.93636e-12	2.9906	NA
ENSMUSG00000019139	Isyna1	25.2097	26.1149	24.851	25.7099	23.9869	23.6076	22.6774	23.7686	24.1288	26.4818	24.9013	24.9691	Isyna1	-0.055708	-0.110304	0.0030708	0.184061	1	0.00889759	1	0.0588904	0.154521	1	0.113486	0.00642747	1	-1.02885	NA
ENSMUSG00000019143	Hars2	32.0415	31.8241	35.6989	37.6277	39.487	39.59	32.3848	32.4091	31.5949	37.8592	38.011	39.4578	Hars2	0.229324	-0.046809	0.213812	7.89855e-09	2.87665e-05	0.252131	1	-0.0170719	0.663032	1	0.259061	7.06074e-11	2.80806e-07	-5.53444	NA
ENSMUSG00000019158	Tmem160	19.9276	21.5042	18.6214	30.0509	28.4032	27.1709	19.1961	21.534	21.6065	29.0683	29.7871	27.8488	Tmem160	0.512096	0.0539801	0.531799	1.26525e-21	6.97024e-18	0.332556	1	0.0184155	0.728072	1	0.476532	3.42426e-19	1.77377e-15	8.82792	NA
ENSMUSG00000019173	Rab5c	211.933	214.769	207.088	242.072	243.858	248.265	205.947	216.573	218.045	254.998	244.641	241.169	Rab5c	0.212253	0.0153508	0.224855	3.54857e-14	1.6295e-10	0.586646	1	0.0128429	0.643506	1	0.209745	6.1783e-14	2.75923e-10	13.6635	NA
ENSMUSG00000019179	Mdh2	234.528	235.924	227.804	188.298	191.773	191.025	227.27	240.508	238.19	195.756	196.997	186.214	Mdh2	-0.290084	0.0158647	-0.270559	4.28922e-25	2.51434e-21	0.570023	1	0.0197473	0.483249	1	-0.286202	1.3699e-24	7.9016e-21	-18.0402	NA
ENSMUSG00000019188	H13	129.502	127.682	122.83	131.448	126.799	127.802	116.07	119.674	117.135	135.683	135.621	130.144	H13	0.022814	-0.106872	0.0792419	0.408334	1	0.000114003	0.978372	0.0563319	0.0386961	1	0.186018	1.25516e-11	5.13988e-08	-1.74057	NA
ENSMUSG00000019189	Rnf145	91.3276	90.847	91.9316	112.29	115.578	111.098	76.219	75.9257	74.3063	101.674	100.282	103.76	Rnf145	0.306077	-0.27561	0.157333	5.94838e-34	3.92653e-30	9.84582e-26	1.19174e-21	-0.148549	1.96096e-09	2.39982e-05	0.433139	2.82864e-63	2.29459e-59	-1.57156	NA
ENSMUSG00000019210	Atp6v1e1	71.3323	71.4057	71.7476	181.282	187.236	183.417	63.8336	68.8081	68.0509	186.519	186.133	180.862	Atp6v1e1	1.36386	-0.0958932	1.3676	0	0	0.0013947	1	0.00422309	0.874275	1	1.46398	0	0	-15.2668	NA
ENSMUSG00000019214	Chtf18	49.4874	48.9018	48.9887	12.1903	11.5628	11.0381	46.0088	46.9257	45.5013	12.1178	11.9433	12.0936	Chtf18	-2.08681	-0.0902831	-2.02728	0	0	0.00153259	1	0.0567886	0.232468	1	-1.93974	0	0	21.4851	NA
ENSMUSG00000019254	Ppp1r12c	57.4689	57.89	57.5939	73.0926	66.4316	68.1721	56.5865	59.0421	60.114	71.9758	69.0405	67.1537	Ppp1r12c	0.264464	0.0230926	0.266803	1.75204e-13	7.8614e-10	0.528215	1	0.00295856	0.931772	1	0.24433	7.95027e-12	3.29221e-08	10.5804	NA
ENSMUSG00000019256	Ahr	22.577	22.7359	24.0537	0.86521	0.96019	1.09975	23.5142	22.7589	22.3128	1.12533	0.836433	1.05746	Ahr	-4.60671	-0.0163605	-4.53286	0	0	0.709937	1	0.0419581	0.798065	1	-4.54847	0	0	278.016	NA
ENSMUSG00000019261	Map1s	76.0812	77.4478	76.2994	71.8112	64.5929	63.7217	76.537	78.1272	77.1817	66.8798	68.7673	63.5202	Map1s	-0.199792	0.0126275	-0.207308	1.39356e-07	0.000468795	0.739797	1	-0.00691188	0.857927	1	-0.219331	6.6577e-09	2.40676e-05	-17.3694	NA
ENSMUSG00000019278	Dpep1	6.28079	6.12429	5.84656	1.68215	1.73347	1.73123	5.43829	5.47804	5.21142	1.66418	1.88339	1.63038	Dpep1	-1.84471	-0.179228	-1.81991	1.39841e-98	1.27856e-94	0.00857205	1	0.00897369	0.969284	1	-1.65654	5.58466e-78	4.80113e-74	9.24267	NA
ENSMUSG00000019295	Tmem129	51.3203	52.3806	49.1216	68.7516	68.6312	67.5406	46.8121	47.6871	46.7625	68.5118	68.6915	64.4701	Tmem129	0.423284	-0.113502	0.400064	9.3816e-42	6.6994e-38	0.000513005	1	-0.0229875	0.448105	1	0.5138	4.44061e-60	3.54583e-56	-4.52678	NA
ENSMUSG00000019297	Nop9	37.7068	40.5294	37.5595	24.6527	23.5573	24.209	41.3057	44.2441	42.155	23.4027	23.6116	22.2855	Nop9	-0.677339	0.141435	-0.740232	1.29318e-65	1.06118e-61	0.000162924	1	-0.0641778	0.128666	1	-0.882953	3.3891e-113	3.19931e-109	-6.24282	NA
ENSMUSG00000019302	Atp6v0a1	97.2096	93.6267	92.7622	305.729	301.081	295.821	81.9096	82.3316	83.353	301.909	298.097	298.551	Atp6v0a1	1.67054	-0.195942	1.66403	0	0	3.02092e-13	3.41787e-09	-0.00646423	0.778928	1	1.86002	0	0	-9.49272	NA
ENSMUSG00000019303	Psmc3ip	28.1257	26.8639	26.8611	9.40307	8.98517	9.4744	30.1421	31.7801	31.0064	10.2703	10.077	9.75672	Psmc3ip	-1.55634	0.183417	-1.44302	1.01313e-289	1.13755e-285	4.15765e-07	0.00410277	0.110368	0.0358379	1	-1.62939	0	0	-8.88356	NA
ENSMUSG00000019326	Aoc3	5.18105	5.24211	5.099	0.22447	0.118168	0.15253	3.4968	3.42552	3.93344	0.0938301	0.108114	0.258398	Aoc3	-5.24507	-0.519897	-5.2297	2.8204e-219	3.0449e-215	3.14652e-10	3.39541e-06	-0.132362	0.776339	1	-4.85802	1.25852e-156	1.27966e-152	9.34419	NA
ENSMUSG00000019338	Zfp687	75.8312	76.1995	74.7212	80.1408	77.0858	78.4562	69.2564	68.2619	67.765	77.7183	75.6864	77.0742	Zfp687	0.0560218	-0.143548	0.0234817	0.0292527	1	3.95183e-08	0.000404193	-0.0325179	0.201862	1	0.167052	9.88639e-11	3.90611e-07	-1.16374	NA
ENSMUSG00000019359	Gdpd2	4.28126	3.56097	3.98598	0.672988	0.736796	0.513376	2.07416	1.73716	1.94921	0.709653	0.9123	0.575009	Gdpd2	-2.68944	-1.05009	-2.45027	5.9551e-76	5.09638e-72	9.30044e-19	1.09941e-14	0.210771	0.3485	1	-1.42866	1.48956e-19	7.77998e-16	1.36052	NA
ENSMUSG00000019362	D8Ertd738e	119.221	122.189	121.618	137.887	138.192	136.477	113.76	123.73	122.584	146.46	138.534	133.913	D8Ertd738e	0.184495	-0.0117773	0.205644	3.36404e-08	0.000117977	0.727547	1	0.022034	0.506753	1	0.218307	5.87845e-11	2.34198e-07	-18.5363	NA
ENSMUSG00000019370	Calm3	304.578	304.135	297.343	209.971	213.562	209.188	277.029	280.979	282.028	223.037	219.833	217.257	Calm3	-0.518229	-0.109156	-0.456852	1.35195e-117	1.29205e-113	9.04219e-07	0.00879986	0.0612968	0.00699441	1	-0.347775	3.66812e-54	2.84353e-50	3.18603	NA
ENSMUSG00000019373	Cops3	37.8734	39.0646	39.4034	31.6047	34.6582	34.7186	40.0671	41.2978	43.0799	35.2111	36.4482	34.377	Cops3	-0.204478	0.0971611	-0.134016	2.0333e-07	0.000675666	0.0121088	1	0.0705285	0.0738435	1	-0.231111	2.3238e-09	8.59805e-06	-2.37864	NA
ENSMUSG00000019428	Fkbp8	165.06	165.533	160.042	218.797	213.888	212.932	150.665	163.456	160.217	221.405	221.578	208.845	Fkbp8	0.396084	-0.0487206	0.409456	2.37386e-37	1.62847e-33	0.120377	1	0.0137985	0.653143	1	0.458603	1.67269e-49	1.2602e-45	-9.41292	NA
ENSMUSG00000019432	Ddx39b	250.291	252.602	241.775	173.368	162.181	165.736	247.807	251.416	255.359	162.84	164.769	159.197	Ddx39b	-0.570914	0.0190809	-0.61314	3.13103e-94	2.82638e-90	0.485897	1	-0.0424381	0.131282	1	-0.632433	2.06593e-115	1.95933e-111	-33.1448	NA
ENSMUSG00000019433	Gipc1	63.1009	64.5813	62.2952	106.539	106.419	105.204	56.9547	63.2465	62.6699	109.895	107.945	105.871	Gipc1	0.74414	-0.054977	0.76887	4.32838e-117	4.13187e-113	0.103884	1	0.0249878	0.423823	1	0.824105	2.25367e-143	2.25164e-139	-14.99	NA
ENSMUSG00000019437	Tlcd1	5.74758	5.95784	5.54754	9.37103	9.12264	9.39922	4.66839	4.8987	5.39639	9.14643	9.63695	8.85212	Tlcd1	0.696715	-0.206775	0.679405	3.5131e-29	2.19393e-25	0.00425246	1	-0.0142022	0.816074	1	0.889296	7.07604e-45	5.14711e-41	-4.30078	NA
ENSMUSG00000019461	Plscr3	72.0155	71.1228	68.0264	43.4584	43.4565	44.8825	61.2729	68.444	64.8391	46.2036	44.4749	44.5236	Plscr3	-0.680052	-0.118144	-0.64305	3.36815e-76	2.88415e-72	0.00100941	1	0.0363933	0.336142	1	-0.525516	3.41293e-46	2.51192e-42	4.44811	NA
ENSMUSG00000019467	Arhgef25	115.172	113.434	113.245	102.294	102.106	102.092	98.9311	101.251	102.724	96.8396	94.7592	93.734	Arhgef25	-0.157561	-0.17455	-0.260815	7.83913e-11	3.15839e-07	7.41795e-13	8.35335e-09	-0.103298	2.38036e-05	0.277103	-0.0863092	0.000442658	0.970306	0.494466	NA
ENSMUSG00000019470	Xab2	50.7538	51.6315	49.022	59.8293	56.9632	57.903	46.2765	47.1574	47.1156	56.0875	54.7927	53.9767	Xab2	0.206793	-0.107396	0.122935	4.17908e-12	1.78154e-08	0.000485478	1	-0.0840172	0.00414505	1	0.230172	2.14333e-14	9.72643e-11	-2.14321	NA
ENSMUSG00000019471	Cdc37	217.332	215.684	211.557	184.277	183.576	180.29	218.249	230.924	226.907	194.309	193.128	186.079	Cdc37	-0.233919	0.0688811	-0.16868	9.52933e-19	4.91809e-15	0.00877628	1	0.0653563	0.0136767	1	-0.237444	1.76827e-19	9.21446e-16	-3.44716	NA
ENSMUSG00000019478	Rab4a	9.87995	9.55315	10.199	14.0164	14.8278	13.1129	9.65602	10.3279	9.83568	15.1661	14.9324	15.109	Rab4a	0.500458	0.00927822	0.609884	1.93237e-21	1.05971e-17	0.881918	1	0.110422	0.0250871	1	0.601604	1.9283e-31	1.2316e-27	64.8405	NA
ENSMUSG00000019487	Trip10	71.8322	70.1241	69.5049	48.6003	46.5153	44.7922	73.1729	76.4554	73.6	45.1105	46.4019	44.8251	Trip10	-0.596714	0.0782259	-0.633234	2.91988e-79	2.52628e-75	0.0103008	1	-0.0368246	0.261048	1	-0.711766	5.58412e-114	5.27643e-110	-9.09885	NA
ENSMUSG00000019494	Cops6	252.407	250.688	241.442	214.824	216.14	213.774	234.618	249.016	250.852	213.754	216.009	210.639	Cops6	-0.207704	-0.0196034	-0.217171	3.855e-14	1.76906e-10	0.474301	1	-0.00969486	0.724769	1	-0.197795	5.46971e-13	2.36182e-09	10.0899	NA
ENSMUSG00000019505	Ubb	313.759	317.734	314.553	432.163	434.154	433.77	307.39	320.192	325.715	445.072	458.615	440.634	Ubb	0.45866	0.0110138	0.506707	7.04438e-75	6.00181e-71	0.663312	1	0.0482751	0.0513701	1	0.495922	1.63926e-87	1.45501e-83	45.0273	NA
ENSMUSG00000019518	Ap4m1	28.3257	25.8485	25.8478	15.8425	15.3433	15.7591	21.7234	21.203	23.3217	14.1192	15.3118	14.0988	Ap4m1	-0.770091	-0.272987	-0.87812	1.39166e-56	1.09148e-52	6.97271e-09	7.27533e-05	-0.109596	0.0362051	1	-0.606701	4.89359e-34	3.22879e-30	2.22245	NA
ENSMUSG00000019528	Gyg	40.8727	40.8123	40.1178	54.1908	56.1727	55.7981	38.6277	42.4068	42.2728	54.9021	54.2617	54.5044	Gyg	0.44823	0.0177816	0.42626	3.45011e-42	2.47338e-38	0.608124	1	-0.0217413	0.49379	1	0.408708	1.16511e-35	7.81208e-32	22.9849	NA
ENSMUSG00000019539	Rcn3	241.193	243.814	238.602	92.5711	91.7782	91.4768	202.366	210.382	214.716	105.815	104.956	102.102	Rcn3	-1.39177	-0.205709	-1.20975	0	0	3.19635e-16	3.7196e-12	0.181855	3.4993e-11	4.31079e-07	-1.00421	0	0	4.8817	NA
ENSMUSG00000019558	Slc6a8	85.6956	86.0533	85.5358	148.54	143.348	147.167	90.5291	90.3099	91.1217	157.791	162.038	159.514	Slc6a8	0.771497	0.0800486	0.897608	1.25524e-224	1.36031e-220	0.00158119	1	0.126451	2.91171e-08	0.000353482	0.817899	7.9371e-260	8.78478e-256	10.2175	NA
ENSMUSG00000019564	Arid3a	13.4958	13.6478	14.7341	13.5198	13.8655	14.3308	12.1666	10.8742	11.1473	13.2263	13.7034	13.149	Arid3a	-0.00498009	-0.293574	-0.0624836	0.925639	1	2.58496e-08	0.000265682	-0.0585417	0.251257	1	0.230054	1.14861e-05	0.0316902	-0.783634	NA
ENSMUSG00000019577	Pdk4	9.66334	8.93729	9.89996	1.85836	1.97405	1.89662	7.53042	8.09335	7.6833	2.20302	2.09582	1.93191	Pdk4	-2.33429	-0.291088	-2.19425	3.41866e-180	3.566e-176	2.36538e-06	0.0226036	0.123631	0.265819	1	-1.9196	3.99092e-121	3.83368e-117	6.59457	NA
ENSMUSG00000019578	Ubxn6	13.3958	13.1651	12.2589	19.0622	16.7008	17.9693	11.631	11.9335	11.534	18.4915	16.7532	16.2548	Ubxn6	0.470948	-0.145632	0.406613	2.65123e-16	1.28611e-12	0.0169267	1	-0.0626028	0.264553	1	0.55398	1.49424e-21	8.17949e-18	-3.80397	NA
ENSMUSG00000019579	Mydgf	75.448	75.8	75.0368	61.7035	62.7886	61.6919	73.3737	82.3481	79.3005	67.5726	65.4444	64.4098	Mydgf	-0.281704	0.054743	-0.197097	4.28543e-16	2.06815e-12	0.110088	1	0.0847305	0.0149394	1	-0.251717	2.16471e-13	9.49657e-10	-4.59816	NA
ENSMUSG00000019659	Ccdc12	17.8948	18.608	19.4022	22.2339	22.595	21.4425	15.7315	18.9022	18.1425	24.7575	22.7012	22.8584	Ccdc12	0.245179	-0.0831166	0.330559	9.05842e-06	0.0261154	0.144064	1	0.086027	0.111442	1	0.414324	5.0607e-14	2.26719e-10	-4.98485	NA
ENSMUSG00000019689	Fmc1	8.79687	8.77084	9.20224	14.0324	13.7108	13.143	9.15391	9.06995	9.76842	13.8267	14.4772	13.5862	Fmc1	0.611717	0.0643937	0.645826	2.50122e-32	1.61929e-28	0.258457	1	0.0360058	0.456166	1	0.583332	1.12501e-30	7.12021e-27	9.05883	NA
ENSMUSG00000019699	Akt3	33.5244	32.8394	33.5061	66.7653	62.9433	66.1724	42.0588	38.997	40.8434	73.9618	72.5	78.5517	Akt3	0.972954	0.287713	1.17111	1.42556e-152	1.44253e-148	1.31025e-13	1.48844e-09	0.199721	6.90614e-09	8.4248e-05	0.884963	1.97521e-134	1.94716e-130	3.07585	NA
ENSMUSG00000019710	Mrpl24	27.0593	25.2327	25.067	32.5658	31.7541	34.042	26.5771	28.8668	28.8204	31.6701	31.2134	31.5727	Mrpl24	0.347914	0.123562	0.28892	7.18255e-18	3.63365e-14	0.00284263	1	-0.059518	0.131629	1	0.164834	3.68617e-05	0.0952874	1.33402	NA
ENSMUSG00000019715	Gle1	71.6322	71.4557	70.103	46.3578	44.7109	45.3486	71.4824	75.9754	73.1628	46.0958	47.0088	45.2473	Gle1	-0.644217	0.0495233	-0.623912	6.13628e-104	5.6871e-100	0.0827122	1	0.020062	0.518814	1	-0.673679	4.91223e-116	4.66613e-112	-13.6033	NA
ENSMUSG00000019718	L3hypdh	4.96443	4.69283	4.40129	3.84465	4.00178	3.83617	4.63492	4.94836	4.7574	4.31222	4.4932	4.31403	L3hypdh	-0.270175	0.029109	-0.0982672	0.00047357	1	0.712151	1	0.169899	0.029121	1	-0.129391	0.0813828	1	-4.44507	NA
ENSMUSG00000019726	Lyst	19.1611	17.859	19.452	25.4216	25.1554	25.3667	21.8573	18.0249	18.3107	22.479	23.384	25.542	Lyst	0.428048	0.0432849	0.337406	1.40092e-12	6.087e-09	0.487096	1	-0.0889284	0.133071	1	0.295836	9.66574e-07	0.00297898	6.83461	NA
ENSMUSG00000019731	Slc35e1	103.275	99.6189	99.3739	124.24	120.922	125.577	108.856	110.289	110.106	131.68	129.84	129.285	Slc35e1	0.295029	0.123414	0.370801	7.23435e-32	4.65386e-28	1.2197e-06	0.0118079	0.0756713	0.00192019	1	0.247287	1.59408e-23	9.04164e-20	2.00371	NA
ENSMUSG00000019732	Calr3	4.3979	4.04368	3.81986	2.32289	1.52727	2.06201	4.95292	4.50144	4.67332	2.14144	2.0503	2.23345	Calr3	-1.057	0.205749	-0.930771	1.25977e-22	7.08242e-19	0.0301436	1	0.115065	0.335392	1	-1.14772	1.65336e-28	1.01632e-24	-5.57823	NA
ENSMUSG00000019734	Tmc4	0.982026	0.864494	0.97915	1.16956	0.977374	1.22003	0.802149	0.826771	1.10844	1.20231	1.42819	1.14792	Tmc4	0.266486	-0.0482462	0.415221	0.112548	1	0.795429	1	0.164745	0.282564	1	0.47949	0.00276307	1	-9.93841	NA
ENSMUSG00000019737	Syne4	0.932038	1.24733	1.01237	1.02539	0.891453	1.14486	0.869097	0.942639	0.923469	0.863609	1.04886	0.997157	Syne4	-0.054636	-0.229614	-0.127294	0.770567	1	0.170762	1	-0.0822219	0.661294	1	0.0927791	0.611532	1	-0.404066	NA
ENSMUSG00000019738	Polr2i	16.2785	16.5107	16.113	8.73029	8.60712	9.06845	16.083	17.2469	16.73	10.5628	9.42453	9.95272	Polr2i	-0.889983	0.0339458	-0.709314	6.85911e-71	5.75548e-67	0.46183	1	0.180155	0.000956322	1	-0.743779	2.51139e-53	1.93729e-49	-21.9108	NA
ENSMUSG00000019761	Krt10	7.16392	7.17292	7.74036	7.75317	8.34936	8.07612	7.69779	7.21606	6.3885	8.546	8.04375	8.32444	Krt10	0.130895	-0.051586	0.17492	0.0492718	1	0.45809	1	0.0440234	0.503702	1	0.226506	0.000602309	1	-4.39084	NA
ENSMUSG00000019763	Rmnd1	16.5284	15.562	16.495	8.84242	8.64149	8.39186	17.355	17.429	16.6123	7.94557	7.54304	7.64598	Rmnd1	-0.912055	0.0814014	-1.07026	4.49829e-78	3.87527e-74	0.063326	1	-0.161594	0.00426466	1	-1.15505	5.81304e-126	5.62993e-122	-14.1896	NA
ENSMUSG00000019768	Esr1	2.91491	2.6455	2.75667	1.66613	1.57882	1.56585	2.275	2.53168	3.44579	1.40245	1.42819	1.13285	Esr1	-0.801543	-0.0118506	-1.07594	1.64231e-08	5.87289e-05	0.946596	1	-0.285904	0.0715535	1	-1.07561	1.11056e-13	4.91867e-10	90.7638	NA
ENSMUSG00000019773	Fbxo5	38.7566	41.4948	42.3106	7.94539	7.47297	7.53485	42.3601	42.5061	43.7861	8.28427	8.31687	8.44505	Fbxo5	-2.42117	0.0699538	-2.28988	0	0	0.0560094	1	0.126207	0.0342665	1	-2.36493	0	0	-33.807	NA
ENSMUSG00000019774	Mtrf1l	10.1299	9.33677	9.21886	7.51289	7.38705	6.67784	9.78991	10.5266	11.0296	6.88328	7.57338	7.26907	Mtrf1l	-0.414319	0.128338	-0.400751	3.2534e-10	1.26818e-06	0.0408893	1	0.0122087	0.882724	1	-0.530453	1.25081e-16	6.08021e-13	-4.13324	NA
ENSMUSG00000019775	Rgs17	25.5596	24.3339	25.1335	12.3345	12.1642	13.5038	24.2339	22.6762	24.1625	13.7343	13.2937	13.9933	Rgs17	-0.980699	-0.0783595	-0.871059	1.43127e-104	1.32908e-100	0.0627467	1	0.108248	0.0280591	1	-0.794094	3.1574e-70	2.63201e-66	10.134	NA
ENSMUSG00000019777	Hdac2	107.89	108.491	107.913	67.6944	68.9405	68.0518	113.66	114.344	117.152	74.8393	73.5014	75.1745	Hdac2	-0.664331	0.0899447	-0.536991	5.41277e-162	5.54376e-158	0.000117956	1	0.12722	5.39098e-07	0.00646487	-0.627056	6.83488e-151	6.89571e-147	-6.97157	NA
ENSMUSG00000019779	Frk	14.8121	14.3802	15.299	10.3802	10.1709	11.3989	14.3256	12.7612	13.6192	12.3333	10.8812	11.5358	Frk	-0.476798	-0.128739	-0.357929	2.62227e-16	1.27259e-12	0.024313	1	0.11921	0.0447878	1	-0.22885	8.38456e-05	0.205925	1.77762	NA
ENSMUSG00000019782	Rwdd1	24.7432	24.7	23.8875	16.0668	18.024	16.8116	28.9036	30.0586	29.947	18.2452	16.9657	18.2751	Rwdd1	-0.528937	0.278268	-0.45593	9.53955e-34	6.27894e-30	8.04065e-12	8.91547e-08	0.0729795	0.112049	1	-0.734227	2.8171e-69	2.34129e-65	-2.63856	NA
ENSMUSG00000019790	Stxbp5	24.6432	24.2506	24.1201	64.9552	62.9948	61.1957	27.6985	27.046	26.0963	58.5816	61.0745	64.5455	Stxbp5	1.37412	0.147137	1.33396	2.31605e-281	2.59027e-277	0.000536507	1	-0.0378572	0.282135	1	1.18913	2.95897e-215	3.19036e-211	8.08175	NA
ENSMUSG00000019791	Hint3	1.68186	2.09622	2.20846	10.4122	9.36322	9.36915	2.02395	2.18408	1.76424	9.46973	9.6673	9.15365	Hint3	2.30086	-0.00297188	2.24996	3.4179e-160	3.49104e-156	1	1	-0.0431784	0.504068	1	2.26068	7.98205e-155	8.09061e-151	-760.69	NA
ENSMUSG00000019792	Trmt11	7.5305	7.63898	8.27195	6.85613	7.30112	7.33939	8.98654	9.81481	9.2135	7.74543	7.75546	7.43491	Trmt11	-0.125413	0.258215	-0.0304938	0.0444033	1	1.37541e-05	0.12607	0.0936344	0.129012	1	-0.289998	7.41279e-07	0.00231131	-1.12309	NA
ENSMUSG00000019794	Katna1	16.5451	17.1765	18.04	19.2384	17.646	17.7739	18.0412	18.9022	18.7143	17.1521	18.0126	18.9987	Katna1	0.0788222	0.104883	0.0650869	0.10887	1	0.0329896	1	-0.0130437	0.791531	1	-0.039105	0.420064	1	-0.372843	NA
ENSMUSG00000019795	Pcmt1	35.7406	36.4514	36.164	44.1953	39.6072	42.4167	35.1464	37.4245	37.06	45.2336	47.0847	44.9005	Pcmt1	0.221163	0.0169273	0.340432	8.05258e-09	2.93114e-05	0.668336	1	0.119795	0.00120637	1	0.324031	9.17325e-18	4.58571e-14	19.1426	NA
ENSMUSG00000019796	Lrp11	4.73115	5.02573	4.56741	15.378	14.9137	14.6315	4.60145	4.83249	4.72377	15.5048	15.4028	15.1391	Lrp11	1.65481	-0.0168319	1.68569	7.78931e-194	8.21928e-190	0.833003	1	0.036086	0.403912	1	1.70774	1.85775e-210	1.99411e-206	-101.459	NA
ENSMUSG00000019797	1700021F05Rik	9.84663	10.5518	10.0495	11.3413	11.2363	11.7447	11.4803	12.248	11.9881	12.6104	11.5791	11.9579	1700021F05Rik	0.174349	0.230977	0.247265	0.000977518	1	1.14886e-05	0.10581	0.0736208	0.140807	1	0.0169915	0.741138	1	0.0735636	NA
ENSMUSG00000019802	Sec63	95.8099	97.1721	98.5267	129.093	133.914	131.425	103.484	100.059	102.203	132.927	132.252	135.662	Sec63	0.436167	0.0687734	0.4595	2.61951e-67	2.16476e-63	0.00768024	1	0.0234639	0.339671	1	0.390858	2.8766e-55	2.24202e-51	5.68326	NA
ENSMUSG00000019804	Snx3	95.9432	94.7919	92.5794	115.67	110.749	116.931	94.7469	103.535	101.48	128.139	129.552	125.229	Snx3	0.277711	0.0814818	0.434651	3.18711e-18	1.62415e-14	0.0114296	1	0.157038	4.95404e-07	0.00594286	0.353267	4.15871e-29	2.58048e-25	4.33553	NA
ENSMUSG00000019806	Aig1	16.795	15.2957	17.0931	11.8699	13.1781	11.9853	17.673	18.2566	19.5046	13.1955	13.0054	13.2545	Aig1	-0.412052	0.172791	-0.316309	4.46594e-14	2.04272e-10	0.000906258	1	0.0934238	0.0974764	1	-0.491422	1.22671e-20	6.58005e-17	-2.84403	NA
ENSMUSG00000019808	Adat2	5.54763	5.69153	5.58076	7.52891	7.42141	7.48974	7.31284	7.36503	7.49832	7.25277	7.57338	7.20876	Adat2	0.418138	0.400676	0.389358	9.1092e-12	3.82677e-08	1.05071e-10	1.14412e-06	-0.0266424	0.650646	1	-0.00918235	0.88578	1	-0.0229171	NA
ENSMUSG00000019809	Pex3	16.4784	17.0933	17.3257	24.1081	24.8117	24.5397	15.7315	16.2869	16.1415	21.4321	23.4143	21.607	Pex3	0.5299	-0.0798837	0.383915	6.02694e-37	4.1158e-33	0.0784086	1	-0.144479	0.000262628	1	0.465307	7.34339e-28	4.478e-24	-5.8248	NA
ENSMUSG00000019810	Fuca2	15.0121	14.2637	14.9501	58.2915	59.8329	59.602	14.878	13.9198	13.636	61.1527	60.9834	61.1683	Fuca2	2.00884	-0.0598085	2.05166	0	0	0.179156	1	0.0446832	0.0927265	1	2.11333	0	0	-35.335	NA
ENSMUSG00000019813	Cep57l1	16.0285	15.4621	14.8338	5.12613	5.80611	5.45998	15.832	15.0785	15.6875	5.65163	5.44912	5.79155	Cep57l1	-1.50568	0.00842808	-1.45514	1.86997e-164	1.91915e-160	0.866271	1	0.0454278	0.527483	1	-1.46869	3.22721e-162	3.30627e-158	-174.261	NA
ENSMUSG00000019814	Ltv1	20.1776	21.3544	20.7976	19.3666	19.6393	19.112	26.4767	28.4861	27.4919	19.8771	19.1203	19.4209	Ltv1	-0.101702	0.404306	-0.0932941	0.0128781	1	9.24696e-26	1.11934e-21	0.00794969	0.856587	1	-0.49806	1.21593e-38	8.38746e-35	-1.23189	NA
ENSMUSG00000019817	Plagl1	12.6126	13.6145	13.0895	6.51974	6.49347	6.07643	13.8737	14.0192	13.266	5.92875	5.37325	5.39955	Plagl1	-1.04763	0.0663328	-1.23595	1.14162e-77	9.82252e-74	0.186648	1	-0.192528	0.00382945	1	-1.30649	1.6246e-120	1.55864e-116	-19.696	NA
ENSMUSG00000019818	Cd164	250.441	250.139	255.28	250.385	260.492	252.73	277.716	272.967	277.824	277.06	272.272	274.458	Cd164	0.0145432	0.132396	0.124184	0.527913	1	9.80102e-09	0.000101901	0.109617	1.85657e-06	0.0220931	-0.00823546	0.720269	1	-0.0622033	NA
ENSMUSG00000019820	Utrn	97.093	95.6907	101.035	82.1911	76.639	78.366	101.927	85.1786	88.2463	80.1816	81.2094	85.2458	Utrn	-0.308859	-0.0937152	-0.252661	1.45253e-10	5.76944e-07	0.0511811	1	0.0562642	0.244267	1	-0.15888	0.000965288	1	1.69535	NA
ENSMUSG00000019822	Smpd2	12.0461	12.2829	11.6443	17.9409	18.3161	18.7211	11.7314	12.2646	11.2986	19.7386	18.7713	19.1344	Smpd2	0.613706	-0.0272693	0.680292	8.2378e-43	5.9271e-39	0.587839	1	0.0677971	0.094396	1	0.708775	3.33629e-58	2.64335e-54	-25.9916	NA
ENSMUSG00000019823	Mical1	23.2768	23.5515	23.6716	25.0051	26.5645	25.0058	23.3134	23.57	24.3979	29.8227	30.0906	29.5977	Mical1	0.118014	0.0158389	0.344445	0.00106795	1	0.673625	1	0.2268	3.92267e-11	4.83155e-07	0.328975	3.94697e-21	2.14479e-17	20.7701	NA
ENSMUSG00000019826	Zbtb24	9.28009	9.28683	9.33514	17.2521	16.7352	17.4581	9.72296	10.7749	9.95339	18.0143	18.225	19.2249	Zbtb24	0.885733	0.126809	0.990608	4.87187e-73	4.12063e-69	0.0220672	1	0.107977	0.0122445	1	0.866904	3.19638e-75	2.7182e-71	6.8363	NA
ENSMUSG00000019831	Wasf1	16.8283	17.4096	17.7244	10.2681	9.94748	10.8877	19.5141	19.7629	19.3364	9.46973	10.8812	10.2844	Wasf1	-0.739994	0.174081	-0.764273	2.32702e-50	1.75783e-46	0.000128973	1	-0.0236708	0.682281	1	-0.937749	2.0557e-84	1.80388e-80	-5.38686	NA
ENSMUSG00000019832	Rab32	20.5108	19.357	19.6016	17.108	18.6598	18.8113	17.2546	17.0483	15.9229	14.7966	13.84	15.0185	Rab32	-0.123889	-0.243992	-0.446454	0.00949401	1	4.82702e-07	0.00475172	-0.322905	4.82321e-11	5.93737e-07	-0.202801	5.06311e-05	0.128654	0.831179	NA
ENSMUSG00000019837	Gtf3c6	25.1764	25.6322	27.3097	19.9913	20.6875	19.2323	25.5896	27.3936	26.2476	20.924	20.4707	20.3104	Gtf3c6	-0.384759	0.0205061	-0.339499	7.43422e-20	3.94162e-16	0.620769	1	0.0439212	0.318604	1	-0.361345	3.47014e-18	1.75381e-14	-17.6213	NA
ENSMUSG00000019838	Slc16a10	11.1297	10.5518	9.89996	10.8447	10.1193	11.2786	10.3924	9.30168	9.73478	9.73146	9.68247	9.90749	Slc16a10	0.032207	-0.102263	-0.105544	0.602006	1	0.087927	1	-0.139551	0.0175904	1	-0.00507936	0.940709	1	0.0496697	NA
ENSMUSG00000019841	Rev3l	53.5198	50.8992	52.9923	46.9985	45.4327	48.0399	58.1598	49.6237	49.9238	44.9873	45.6736	47.4033	Rev3l	-0.163978	0.00267542	-0.189211	0.000455525	1	0.956514	1	-0.025286	0.594521	1	-0.19194	4.00178e-05	0.102886	-71.7418	NA
ENSMUSG00000019842	Traf3ip2	16.845	17.1432	17.5084	9.13076	9.10546	8.52718	14.9114	15.6579	14.6449	7.8532	7.81615	7.63091	Traf3ip2	-0.948331	-0.187868	-1.14407	9.21023e-89	8.18513e-85	1.7667e-05	0.160999	-0.199018	0.000337501	1	-0.959483	8.79484e-84	7.70076e-80	5.10723	NA
ENSMUSG00000019843	Fyn	85.379	83.8894	86.1837	79.8364	80.4539	80.7566	90.4789	92.0976	89.1712	81.0745	82.6206	80.964	Fyn	-0.0837253	0.0892938	-0.0622517	0.000779792	1	0.000302008	1	0.0214264	0.388769	1	-0.151593	6.85843e-10	2.60963e-06	-1.69769	NA
ENSMUSG00000019845	Tube1	7.96373	6.80674	7.42473	2.21076	2.62705	2.7386	7.79821	7.14985	7.26291	2.52633	2.20203	2.58021	Tube1	-1.56108	0.000970139	-1.60313	3.70414e-69	3.08407e-65	1	1	-0.0536502	0.623305	1	-1.61571	2.24605e-74	1.90443e-70	-1665.45	NA
ENSMUSG00000019846	Lama4	93.2105	90.4142	93.4267	31.5086	29.967	31.1252	81.3238	76.3396	78.2075	33.3021	34.3543	34.0905	Lama4	-1.5813	-0.23229	-1.44513	0	0	7.88436e-16	9.14586e-12	0.135394	0.000112234	1	-1.21362	0	0	5.22458	NA
ENSMUSG00000019849	Prep	123.304	125.751	122.781	55.3281	53.0796	54.8508	144.355	148.509	147.336	57.6425	58.2674	57.8062	Prep	-1.18741	0.243567	-1.09787	0	0	1.20183e-24	1.45013e-20	0.0890864	0.00139752	1	-1.34189	0	0	-5.50933	NA
ENSMUSG00000019850	Tnfaip3	8.08037	6.65693	7.24199	11.966	11.8377	11.3237	6.2082	5.39528	5.49728	7.31435	8.31687	7.78167	Tnfaip3	0.678097	-0.363883	0.093729	4.9687e-23	2.8093e-19	2.10288e-06	0.020154	-0.586306	2.7742e-18	3.46774e-14	0.455686	1.22784e-09	4.60931e-06	-1.25229	NA
ENSMUSG00000019853	Hebp2	3.28149	3.56097	2.88957	3.94076	3.88149	4.10681	2.37543	2.76342	2.77317	4.51236	4.58424	3.89188	Hebp2	0.297459	-0.301626	0.417853	0.00205515	1	0.00404231	1	0.122049	0.179894	1	0.721148	1.65649e-13	7.29353e-10	-2.39087	NA
ENSMUSG00000019854	Reps1	56.969	58.6557	57.5109	43.5065	40.7929	40.9432	58.4276	62.4685	59.021	40.6612	41.4857	42.6239	Reps1	-0.467382	0.0555509	-0.472784	1.7197e-43	1.24472e-39	0.0911871	1	-0.0054335	0.879329	1	-0.528367	4.64381e-56	3.63564e-52	-9.51141	NA
ENSMUSG00000019857	Asf1a	11.3796	11.8002	12.8902	7.19252	8.43528	7.56492	13.8235	15.1778	14.5776	8.37665	7.54304	8.59582	Asf1a	-0.641318	0.273512	-0.557389	2.1094e-21	1.15489e-17	1.39257e-05	0.127602	0.0824473	0.252134	1	-0.832389	8.81867e-38	6.03814e-34	-3.04334	NA
ENSMUSG00000019861	Gopc	39.1231	37.8495	40.3503	42.4653	44.3329	44.9576	39.4144	36.9279	37.3122	43.5093	43.0789	43.3627	Gopc	0.16767	-0.0459329	0.147961	7.89779e-07	0.00249807	0.187682	1	-0.0201078	0.54958	1	0.193496	1.1866e-08	4.21838e-05	-4.21257	NA
ENSMUSG00000019863	Qrsl1	8.84686	8.904	8.78694	9.339	8.88206	8.48207	9.37149	8.87132	8.94446	7.59147	7.54304	8.09828	Qrsl1	0.00785995	0.0349372	-0.192612	0.892914	1	0.545158	1	-0.200215	0.000403956	1	-0.227292	6.61048e-05	0.165196	-6.50573	NA
ENSMUSG00000019864	Rtn4ip1	5.34768	5.95784	5.48109	9.85159	9.99903	10.0608	6.71031	6.5043	6.18672	10.0548	10.8205	10.0733	Rtn4ip1	0.836956	0.210003	0.883268	2.0886e-43	1.51005e-39	0.00195268	1	0.0492606	0.360995	1	0.676216	2.87314e-31	1.83191e-27	3.22003	NA
ENSMUSG00000019866	Crybg1	1.38193	1.11417	1.14527	0.400673	0.169721	0.347988	0.869097	0.810218	0.973915	0.309368	0.290194	0.258398	Crybg1	-2.08103	-0.470987	-2.08273	6.1986e-23	3.50159e-19	0.00474371	1	-0.130013	0.772639	1	-1.7402	4.26405e-14	1.91371e-10	3.69479	NA
ENSMUSG00000019868	Vta1	15.0621	15.0293	14.7009	18.6618	18.9519	18.6158	13.5557	14.0854	13.9723	20.0003	19.0899	19.1646	Vta1	0.328224	-0.106355	0.378889	7.54528e-16	3.62098e-12	0.0154731	1	0.0513977	0.180094	1	0.485978	5.19111e-33	3.38409e-29	-4.56941	NA
ENSMUSG00000019873	Reep3	59.1351	62.6671	63.3916	131.865	133.243	134.974	68.7376	68.1957	68.2695	146.352	146.576	149.05	Reep3	1.11172	0.148057	1.25555	0	0	2.39758e-07	0.00238799	0.143627	7.89848e-09	9.62982e-05	1.10729	0	0	7.47883	NA
ENSMUSG00000019877	Serinc1	212.849	213.287	218.085	360.144	366.535	372.772	211.839	208.214	210.596	366.585	363.645	366.366	Serinc1	0.771297	-0.0307412	0.767482	8.19586e-256	9.03758e-252	0.184138	1	-0.00381468	0.864303	1	0.798223	5.41709e-274	6.03518e-270	-25.9659	NA
ENSMUSG00000019878	Hsf2	21.8105	21.421	23.1566	24.076	24.2618	24.1488	24.5854	24.2155	23.6748	24.2649	24.8406	25.0445	Hsf2	0.126814	0.126744	0.160198	0.000709383	1	0.000781667	1	0.0329916	0.367019	1	0.0330617	0.368467	1	0.260855	NA
ENSMUSG00000019880	Rspo3	12.7959	12.7323	13.4882	0.43271	0.788348	0.6938	13.857	13.8536	13.8209	0.586488	0.50262	0.575009	Rspo3	-4.42053	0.0903	-4.5541	0	0	0.0582103	1	-0.20852	0.310649	1	-4.71945	0	0	-52.2641	NA
ENSMUSG00000019883	Echdc1	3.0982	3.21143	2.69022	3.74854	4.27672	4.09177	3.27922	3.42552	3.17674	4.12747	4.97875	4.28388	Echdc1	0.431875	0.136431	0.57253	8.94286e-06	0.0258002	0.186298	1	0.146464	0.106045	1	0.441908	2.422e-06	0.00716911	3.23906	NA
[truncated: 11,082 more rows]

## Sheet: Up-regulated after Dox(327)
Gene ID	Gene name	WT_1	WT_2	WT_3	KO_1	KO_2	KO_3	WT-Dox_1	WT-Dox_2	WT-Dox_3	KO-Dox_1	KO-Dox_2	KO-Dox3	Gene group
[truncated: 327 more rows]

[truncated: 2 more sheets: CBP-dependent UPRmt genes(197), Heat-map (25)_E.D.Fig.6c]
