# Supplementary material for: A conserved role of CBP/p300 in mitochondrial stress response and longevity
Source: Research Square preprint supplement (doi:10.21203/rs.3.rs-86465/v1), 2020-10-14
Supplement: Supplementary file 8 [file ede4ec3ce310e6ee705a1ccb.xlsx]

## Sheet: Up in H3k18Ac_cco vs ev (4639)
Peak	seqnames	start	end	width	strand	summit	start_position	end_position	feature_strand	insideFeature	distancetoFeature	shortestDistance	fromOverlappingOrNearest	fold.enrichment	FDR/-log10 qvalue	score	Gene ID	symbol
X0001	chrI	9672	9934	263	*	263	4119	10230	-	inside	558	296	NearestLocation	1.59843	9.39626	11.5019	WBGene00022277	homt-1
X0002	chrI	11341	11621	281	*	281	10413	16842	+	inside	928	928	NearestLocation	1.42691	7.09439	9.02688	WBGene00022276	nlp-40
X0003	chrI	12781	13052	272	*	272	10413	16842	+	inside	2368	2368	NearestLocation	1.56139	9.70683	11.8216	WBGene00022276	nlp-40
X0004	chrI	14842	15207	366	*	366	10413	16842	+	inside	4429	1635	NearestLocation	1.90634	12.1659	14.4729	WBGene00022276	nlp-40
X0005	chrI	16371	16649	279	*	279	10413	16842	+	inside	5958	193	NearestLocation	1.81995	17.1715	19.8558	WBGene00022276	nlp-40
X0006	chrI	21640	22033	394	*	394	22882	23600	-	downstream	1960	849	NearestLocation	1.22432	2.02552	3.54105	WBGene00235381	Y74C9A.9
X0007	chrI	22753	23002	250	*	250	22882	23600	-	overlapEnd	847	120	NearestLocation	1.51612	4.63262	6.37767	WBGene00235381	Y74C9A.9
X0008	chrI	30253	30545	293	*	293	31523	31543	+	upstream	-1270	978	NearestLocation	1.80258	12.6743	15.0127	WBGene00170953	21ur-15479
X0009	chrI	31992	32283	292	*	292	32415	32435	+	upstream	-423	132	NearestLocation	1.72146	13.5954	16.0033	WBGene00173569	21ur-13439
X0010	chrI	33264	33748	485	*	485	27595	32482	-	upstream	-782	782	NearestLocation	1.94153	14.2593	16.7301	WBGene00022279	sesn-1
X0011	chrI	34079	35097	1019	*	1019	27595	32482	-	upstream	-1597	1597	NearestLocation	2.07009	13.4464	15.8703	WBGene00022279	sesn-1
X0012	chrI	35300	35812	513	*	513	27595	32482	-	upstream	-2818	2818	NearestLocation	1.57634	2.72717	4.30664	WBGene00022279	sesn-1
X0013	chrI	37131	39046	1916	*	1916	27595	32482	-	upstream	-4649	4649	NearestLocation	1.80468	5.09981	6.88346	WBGene00022279	sesn-1
X0014	chrI	39873	40425	553	*	553	43733	44677	+	upstream	-3860	3308	NearestLocation	1.80724	10.5439	12.7218	WBGene00022275	Y74C9A.1
X0015	chrI	43232	43536	305	*	305	43733	44677	+	upstream	-501	197	NearestLocation	1.73	17.6398	20.3709	WBGene00022275	Y74C9A.1
X0016	chrI	47359	47671	313	*	313	47472	49819	+	overlapStart	-113	113	NearestLocation	1.61782	7.02656	8.95766	WBGene00044345	Y48G1C.12
X0017	chrI	67674	67944	271	*	271	71425	81071	+	upstream	-3751	3481	NearestLocation	1.76049	8.1322	10.1439	WBGene00000812	csk-1
X0018	chrI	92159	92426	268	*	268	93031	94881	+	upstream	-872	605	NearestLocation	1.88312	8.34153	10.3698	WBGene00021676	Y48G1C.1
X0019	chrI	93195	93467	273	*	273	93031	94881	+	inside	164	164	NearestLocation	1.60244	5.4605	7.27581	WBGene00021676	Y48G1C.1
X0020	chrI	96378	96703	326	*	326	94834	95367	-	upstream	-1011	1011	NearestLocation	1.55609	2.41561	3.9714	WBGene00189949	Y48G1C.13
X0021	chrI	107643	108111	469	*	469	96535	108161	-	inside	518	50	NearestLocation	1.25146	3.05924	4.68103	WBGene00021681	Y48G1C.8
X0022	chrI	110478	110836	359	*	359	110551	110771	-	includeFeature	293	65	NearestLocation	1.5355	11.7269	14.0033	WBGene00199899	F53G12.16
X0023	chrI	111075	111731	657	*	657	111287	111436	-	includeFeature	361	212	NearestLocation	1.60542	9.81862	11.9489	WBGene00202494	F53G12.17
X0024	chrI	112621	112914	294	*	294	112365	113672	+	inside	256	256	NearestLocation	1.7558	14.942	17.4542	WBGene00018774	F53G12.9
X0025	chrI	113220	113571	352	*	352	113807	114711	+	upstream	-587	236	NearestLocation	1.87372	15.0448	17.5809	WBGene00018773	F53G12.8
X0026	chrI	168069	168335	267	*	267	160172	166819	-	upstream	-1250	1250	NearestLocation	1.75955	10.0351	12.1866	WBGene00004225	ptr-11
X0027	chrI	172806	173077	272	*	272	171340	175991	+	inside	1466	1466	NearestLocation	1.66173	6.48718	8.3834	WBGene00018958	F56C11.6
X0028	chrI	181179	183014	1836	*	1836	182079	182771	-	includeFeature	1592	243	NearestLocation	2.29771	12.2728	14.5964	WBGene00018955	F56C11.3
X0029	chrI	183348	184259	912	*	912	183364	208467	+	overlapStart	-16	16	NearestLocation	2.23012	11.8258	14.1142	WBGene00000227	atm-1
X0030	chrI	221005	221320	316	*	316	219735	221575	-	inside	570	255	NearestLocation	1.33129	1.13988	2.55003	WBGene00021664	Y48G1BL.5
X0031	chrI	279671	280330	660	*	660	280120	280445	+	overlapStart	-449	115	NearestLocation	1.57604	7.8585	9.8491	WBGene00016904	C53D5.3
X0032	chrI	287560	287813	254	*	254	286089	289138	-	inside	1578	1325	NearestLocation	1.49377	7.33494	9.29287	WBGene00016905	ztf-3
X0033	chrI	292812	293245	434	*	434	291215	305460	+	inside	1597	1597	NearestLocation	2.04487	13.0519	15.4205	WBGene00016902	C53D5.1
X0034	chrI	295270	296119	850	*	850	291215	305460	+	inside	4055	4055	NearestLocation	1.6259	2.74347	4.33033	WBGene00016902	C53D5.1
X0035	chrI	298786	300710	1925	*	1925	291215	305460	+	inside	7571	4750	NearestLocation	1.74168	4.56514	6.28878	WBGene00016902	C53D5.1
X0036	chrI	301294	301616	323	*	323	305810	311130	-	downstream	9836	4194	NearestLocation	1.57286	10.7325	12.9324	WBGene00016906	C53D5.5
X0037	chrI	302495	302761	267	*	267	305810	311130	-	downstream	8635	3049	NearestLocation	1.50838	6.49339	8.38724	WBGene00016906	C53D5.5
X0038	chrI	307336	307656	321	*	321	305810	311130	-	inside	3794	1526	NearestLocation	1.31289	3.64194	5.31089	WBGene00016906	C53D5.5
X0039	chrI	309214	309597	384	*	384	305810	311130	-	inside	1916	1533	NearestLocation	1.8476	13.8058	16.2415	WBGene00016906	C53D5.5
X0040	chrI	311778	312106	329	*	329	305810	311130	-	upstream	-648	648	NearestLocation	1.75247	13.3491	15.7412	WBGene00016906	C53D5.5
X0041	chrI	312506	312871	366	*	366	305810	311130	-	upstream	-1376	1376	NearestLocation	1.63657	6.84692	8.75294	WBGene00016906	C53D5.5
X0042	chrI	313168	313907	740	*	740	310980	314989	-	inside	1821	1082	NearestLocation	1.50407	6.97931	8.90421	WBGene00002077	imb-3
X0043	chrI	315721	316011	291	*	291	310980	314989	-	upstream	-732	732	NearestLocation	1.77194	6.45028	8.34414	WBGene00002077	imb-3
X0044	chrI	318811	319083	273	*	273	316637	318258	-	upstream	-553	553	NearestLocation	1.58514	11.4587	13.7131	WBGene00235385	Y48G1A.7
X0045	chrI	323154	323445	292	*	292	318542	323352	-	overlapStart	198	93	NearestLocation	1.58057	10.9625	13.1775	WBGene00002079	xpo-2
X0046	chrI	323850	324146	297	*	297	323860	330990	+	overlapStart	-10	10	NearestLocation	1.72409	10.3748	12.5479	WBGene00021660	Y48G1A.4
X0047	chrI	324391	324685	295	*	295	323860	330990	+	inside	531	531	NearestLocation	1.83336	7.13468	9.07357	WBGene00021660	Y48G1A.4
X0048	chrI	330249	330671	423	*	423	332609	337844	+	upstream	-2360	1938	NearestLocation	1.59179	5.5336	7.34728	WBGene00000917	daf-25
X0049	chrI	332575	332865	291	*	291	332609	337844	+	overlapStart	-34	34	NearestLocation	1.89941	10.4333	12.6107	WBGene00000917	daf-25
X0050	chrI	347974	348246	273	*	273	343250	348364	-	inside	390	118	NearestLocation	1.51246	9.15227	11.2371	WBGene00021661	mbtr-1
X0051	chrI	364394	365159	766	*	766	364519	368465	+	overlapStart	-125	125	NearestLocation	1.63274	10.9827	13.2037	WBGene00020091	rnp-8
X0052	chrI	378858	379115	258	*	258	373074	379073	-	overlapStart	215	42	NearestLocation	1.54299	9.04584	11.1256	WBGene00020089	R119.3
X0053	chrI	379429	380049	621	*	621	373074	379073	-	upstream	-356	356	NearestLocation	1.58119	9.43244	11.5374	WBGene00020089	R119.3
X0054	chrI	380658	381362	705	*	705	379073	381902	-	inside	1244	540	NearestLocation	1.5532	8.4739	10.5028	WBGene00004143	pqn-59
X0055	chrI	383088	383440	353	*	353	382833	388847	+	inside	255	255	NearestLocation	1.52426	11.3498	13.5926	WBGene00006385	taf-4
X0056	chrI	393249	393586	338	*	338	388507	394415	-	inside	1166	829	NearestLocation	1.39398	3.65118	5.32079	WBGene00020090	R119.5
X0057	chrI	395147	395424	278	*	278	388507	394415	-	upstream	-732	732	NearestLocation	1.53814	8.87095	10.9342	WBGene00020090	R119.5
X0058	chrI	397758	398024	267	*	267	398891	412901	+	upstream	-1133	867	NearestLocation	1.6047	4.78502	6.55051	WBGene00021733	otub-2
X0059	chrI	430505	430863	359	*	359	420922	423718	+	downstream	9583	6787	NearestLocation	1.67434	6.3198	8.19872	WBGene00015570	C07F11.2
X0060	chrI	438023	438549	527	*	527	443999	461607	+	upstream	-5976	5450	NearestLocation	1.32261	3.34806	4.99225	WBGene00006593	tol-1
X0061	chrI	462458	462962	505	*	505	463304	463324	+	upstream	-846	342	NearestLocation	1.6162	3.01325	4.62856	WBGene00166632	21ur-8411
X0062	chrI	488299	488565	267	*	267	488605	489905	+	upstream	-306	40	NearestLocation	1.74954	11.3746	13.6186	WBGene00021024	W04C9.2
X0063	chrI	491164	491432	269	*	269	489984	496154	+	inside	1180	1180	NearestLocation	1.57337	8.31032	10.3353	WBGene00001814	haf-4
X0064	chrI	514983	515286	304	*	304	514364	514492	+	downstream	619	491	NearestLocation	1.77356	13.9457	16.3818	WBGene00196389	Y65B4BL.9
X0065	chrI	519364	519679	316	*	316	511048	519646	-	overlapStart	282	33	NearestLocation	1.59896	11.2587	13.4907	WBGene00022037	acs-13
X0066	chrI	534781	535062	282	*	282	534453	535347	+	inside	328	285	NearestLocation	1.588	10.4209	12.5967	WBGene00022043	psf-3
X0067	chrI	535795	536141	347	*	347	535791	536670	+	inside	4	4	NearestLocation	1.55399	13.2644	15.6549	WBGene00022042	icd-2
X0068	chrI	537601	537994	394	*	394	537122	542173	+	inside	479	479	NearestLocation	1.43867	7.90573	9.8912	WBGene00007009	wwp-1
X0069	chrI	538423	538896	474	*	474	539086	539242	+	upstream	-663	190	NearestLocation	1.29987	3.31597	4.95596	WBGene00220191	Y65B4BR.12
X0070	chrI	543570	543867	298	*	298	539086	539242	+	downstream	4484	4328	NearestLocation	2.01121	13.2233	15.6079	WBGene00220191	Y65B4BR.12
X0071	chrI	545206	545460	255	*	255	550708	556638	+	upstream	-5502	5248	NearestLocation	1.48096	1.91734	3.42524	WBGene00004235	ptr-21
X0072	chrI	548424	549113	690	*	690	550708	556638	+	upstream	-2284	1595	NearestLocation	2.04503	14.2291	16.7023	WBGene00004235	ptr-21
X0073	chrI	549878	550323	446	*	446	550708	556638	+	upstream	-830	385	NearestLocation	1.51682	10.9383	13.1572	WBGene00004235	ptr-21
X0074	chrI	550598	550923	326	*	326	550708	556638	+	overlapStart	-110	110	NearestLocation	1.75523	17.5527	20.275	WBGene00004235	ptr-21
X0075	chrI	553885	554161	277	*	277	553658	553785	+	downstream	227	100	NearestLocation	1.58878	2.67027	4.25358	WBGene00202444	Y65B4BR.11
X0076	chrI	555774	556073	300	*	300	557431	561671	+	upstream	-1657	1358	NearestLocation	1.84478	6.8002	8.71499	WBGene00002393	lpr-1
X0077	chrI	558802	559136	335	*	335	557431	561671	+	inside	1371	1371	NearestLocation	1.99131	5.98392	7.83695	WBGene00002393	lpr-1
X0078	chrI	630111	630395	285	*	285	630006	630218	-	overlapStart	107	105	NearestLocation	1.87043	11.1923	13.4223	WBGene00220188	Y65B4A.10
X0079	chrI	637510	637780	271	*	271	638129	653985	+	upstream	-619	349	NearestLocation	1.66819	8.97683	11.0509	WBGene00022026	Y65B4A.2
X0080	chrI	638335	638594	260	*	260	638129	653985	+	inside	206	206	NearestLocation	1.80217	5.5898	7.41994	WBGene00022026	Y65B4A.2
X0081	chrI	639625	640122	498	*	498	638129	653985	+	inside	1496	1496	NearestLocation	1.80105	4.98301	6.7502	WBGene00022026	Y65B4A.2
X0082	chrI	663089	663697	609	*	609	659557	663594	-	overlapStart	505	103	NearestLocation	1.4959	6.95396	8.86449	WBGene00022031	Y65B4A.8
X0083	chrI	681464	681711	248	*	248	680414	683528	+	inside	1050	1050	NearestLocation	1.7435	6.97373	8.90791	WBGene00021215	Y18H1A.11
X0084	chrI	713304	713698	395	*	395	700274	715850	-	inside	2546	2152	NearestLocation	1.50277	1.9733	3.48303	WBGene00021209	hgap-1
X0085	chrI	714548	715103	556	*	556	700274	715850	-	inside	1302	747	NearestLocation	1.86188	6.81715	8.7109	WBGene00021209	hgap-1
X0086	chrI	715393	715672	280	*	280	700274	715850	-	inside	457	178	NearestLocation	1.9963	6.24313	8.11602	WBGene00021209	hgap-1
X0087	chrI	716934	717553	620	*	620	700274	715850	-	upstream	-1084	1084	NearestLocation	1.63284	3.74621	5.41124	WBGene00021209	hgap-1
X0088	chrI	741010	741265	256	*	256	740835	741878	+	inside	175	175	NearestLocation	1.56678	4.05635	5.7551	WBGene00236789	Y18H1A.18
X0089	chrI	753440	753718	279	*	279	754680	754763	+	upstream	-1240	962	NearestLocation	1.59373	3.43279	5.08542	WBGene00023169	Y18H1A.t1
X0090	chrI	819589	820080	492	*	492	816036	816306	+	downstream	3553	3283	NearestLocation	1.41272	6.12932	7.98977	WBGene00200506	ZC123.9
X0091	chrI	849279	849640	362	*	362	841746	846763	-	upstream	-2516	2516	NearestLocation	1.47186	6.25553	8.12586	WBGene00022519	ZC123.4
X0092	chrI	853570	854209	640	*	640	853451	871947	+	inside	119	119	NearestLocation	1.78317	7.90294	9.8984	WBGene00022388	Y95B8A.8
X0093	chrI	872778	873706	929	*	929	872768	882713	-	inside	9935	10	NearestLocation	1.59297	6.11301	7.96594	WBGene00022389	pde-6
X0094	chrI	877606	878347	742	*	742	872768	882713	-	inside	5107	4366	NearestLocation	1.58086	10.0318	12.179	WBGene00022389	pde-6
X0095	chrI	881058	881379	322	*	322	872768	882713	-	inside	1655	1334	NearestLocation	1.56104	5.98316	7.83498	WBGene00022389	pde-6
X0096	chrI	881761	882567	807	*	807	872768	882713	-	inside	952	146	NearestLocation	1.32542	6.08326	7.93172	WBGene00022389	pde-6
X0097	chrI	885322	885661	340	*	340	882918	890194	+	inside	2404	2404	NearestLocation	1.82307	16.2541	18.873	WBGene00022386	Y95B8A.6
X0098	chrI	886858	887125	268	*	268	882918	890194	+	inside	3940	3069	NearestLocation	1.60549	5.71764	7.55254	WBGene00022386	Y95B8A.6
X0099	chrI	887833	888104	272	*	272	882918	890194	+	inside	4915	2090	NearestLocation	1.55959	6.47392	8.3678	WBGene00022386	Y95B8A.6
X0100	chrI	894607	894854	248	*	248	889932	895099	-	inside	492	245	NearestLocation	1.58323	3.83909	5.52612	WBGene00022390	him-19
X0101	chrI	921720	921981	262	*	262	912415	926877	-	inside	5157	4896	NearestLocation	1.69082	4.81292	6.57462	WBGene00022391	Y95B8A.12
X0102	chrI	926130	926403	274	*	274	912415	926877	-	inside	747	474	NearestLocation	1.65862	8.67015	10.7121	WBGene00022391	Y95B8A.12
X0103	chrI	937489	938154	666	*	666	938483	941776	+	upstream	-994	329	NearestLocation	1.67084	9.98573	12.1269	WBGene00022383	Y95B8A.2
X0104	chrI	946336	946636	301	*	301	946044	946115	-	upstream	-221	221	NearestLocation	1.48353	8.24587	10.2592	WBGene00023199	Y95B8A.t1
X0105	chrI	960497	960865	369	*	369	948566	957373	-	upstream	-3124	3124	NearestLocation	1.22949	2.2638	3.80534	WBGene00003238	mig-1
X0106	chrI	961265	961540	276	*	276	948566	957373	-	upstream	-3892	3892	NearestLocation	1.72504	13.8667	16.2998	WBGene00003238	mig-1
X0107	chrI	961883	962614	732	*	732	948566	957373	-	upstream	-4510	4510	NearestLocation	1.82793	8.47639	10.5191	WBGene00003238	mig-1
X0108	chrI	973074	973327	254	*	254	969680	976550	-	inside	3476	3223	NearestLocation	1.28152	2.87159	4.47668	WBGene00018788	shc-1
X0109	chrI	987242	987552	311	*	311	989671	992163	+	upstream	-2429	2119	NearestLocation	1.60711	10.1741	12.3288	WBGene00018786	hmbx-1
X0110	chrI	999106	999361	256	*	256	996277	996576	-	upstream	-2530	2530	NearestLocation	1.45898	5.23191	7.03453	WBGene00199650	C54G6.7
X0111	chrI	1010957	1011384	428	*	428	1011386	1014381	-	downstream	3424	2	NearestLocation	1.45976	2.08746	3.60883	WBGene00016930	madf-6
X0112	chrI	1015196	1015701	506	*	506	1015204	1015731	-	overlapEnd	535	8	NearestLocation	1.99535	13.944	16.4021	WBGene00236808	C54G6.8
X0113	chrI	1016307	1016613	307	*	307	1016405	1017180	+	overlapStart	-98	98	NearestLocation	1.84428	11.1499	13.3791	WBGene00005002	spp-17
X0114	chrI	1017182	1017439	258	*	258	1016405	1017180	+	downstream	777	2	NearestLocation	1.9758	5.94769	7.80351	WBGene00005002	spp-17
X0115	chrI	1017700	1017950	251	*	251	1018835	1019219	+	upstream	-1135	885	NearestLocation	1.79164	3.90765	5.60106	WBGene00021335	spp-23
X0116	chrI	1018781	1019074	294	*	294	1018835	1019219	+	overlapStart	-54	54	NearestLocation	1.41558	5.97396	7.81132	WBGene00021335	spp-23
X0117	chrI	1029695	1029988	294	*	294	1019825	1029952	-	overlapStart	257	36	NearestLocation	1.74753	15.1873	17.7201	WBGene00021327	mrpl-38
X0118	chrI	1030757	1031177	421	*	421	1019825	1029952	-	upstream	-805	805	NearestLocation	1.74476	14.7361	17.2323	WBGene00021327	mrpl-38
X0119	chrI	1033058	1033386	329	*	329	1030629	1033436	-	inside	378	50	NearestLocation	1.47975	2.09783	3.62328	WBGene00004952	spd-1
X0120	chrI	1047841	1048206	366	*	366	1049594	1050726	+	upstream	-1753	1388	NearestLocation	2.20595	18.0083	20.766	WBGene00021331	glrx-10
X0121	chrI	1048768	1049015	248	*	248	1049594	1050726	+	upstream	-826	579	NearestLocation	1.68531	4.55398	6.2975	WBGene00021331	glrx-10
X0122	chrI	1050066	1051209	1144	*	1144	1049594	1050726	+	overlapEnd	472	472	NearestLocation	1.57959	10.5831	12.7675	WBGene00021331	glrx-10
X0123	chrI	1051847	1052138	292	*	292	1050921	1053645	-	inside	1798	926	NearestLocation	1.76818	15.1027	17.6231	WBGene00021333	Y34D9A.8
X0124	chrI	1052447	1053186	740	*	740	1050921	1053645	-	inside	1198	459	NearestLocation	1.88274	7.57162	9.53678	WBGene00021333	Y34D9A.8
X0125	chrI	1053562	1053984	423	*	423	1050921	1053645	-	overlapStart	83	83	NearestLocation	1.666	9.82662	11.9536	WBGene00021333	Y34D9A.8
X0126	chrI	1060419	1060773	355	*	355	1062293	1065269	+	upstream	-1874	1520	NearestLocation	1.66802	10.3475	12.5184	WBGene00021328	npr-23
X0127	chrI	1061766	1062243	478	*	478	1062293	1065269	+	upstream	-527	50	NearestLocation	1.41094	5.4872	7.29355	WBGene00021328	npr-23
X0128	chrI	1063539	1063935	397	*	397	1062293	1065269	+	inside	1246	1246	NearestLocation	1.8862	17.325	20.0333	WBGene00021328	npr-23
X0129	chrI	1064599	1064974	376	*	376	1053921	1066899	-	inside	2300	1925	NearestLocation	1.63285	11.2495	13.4884	WBGene00021334	vps-4
X0130	chrI	1068910	1070469	1560	*	1560	1068591	1075010	+	inside	319	319	NearestLocation	1.29118	4.11989	5.81831	WBGene00001745	gsa-1
X0131	chrI	1076034	1076292	259	*	259	1068591	1075010	+	downstream	7443	1024	NearestLocation	1.6332	8.95004	11.0196	WBGene00001745	gsa-1
X0132	chrI	1078071	1078319	249	*	249	1084579	1088588	+	upstream	-6508	6260	NearestLocation	1.57116	6.0295	7.88917	WBGene00019909	R06A10.1
X0133	chrI	1095590	1095898	309	*	309	1089666	1095796	-	overlapStart	206	102	NearestLocation	1.59108	11.6603	13.9274	WBGene00019911	R06A10.4
X0134	chrI	1096231	1096581	351	*	351	1089666	1095796	-	upstream	-435	435	NearestLocation	1.91854	9.15466	11.2326	WBGene00019911	R06A10.4
X0135	chrI	1097319	1097627	309	*	309	1089666	1095796	-	upstream	-1523	1523	NearestLocation	2.29679	10.9968	13.2151	WBGene00019911	R06A10.4
X0136	chrI	1105585	1105973	389	*	389	1107578	1112251	+	upstream	-1993	1605	NearestLocation	1.88949	6.02045	7.88125	WBGene00022838	ZK993.2
X0137	chrI	1155368	1155620	253	*	253	1155343	1156020	-	inside	652	25	NearestLocation	1.40412	6.00529	7.86297	WBGene00000165	aps-3
X0138	chrI	1156527	1156937	411	*	411	1156577	1157462	+	overlapStart	-50	50	NearestLocation	1.34378	5.91126	7.74436	WBGene00004429	rpl-17
X0139	chrI	1177834	1178081	248	*	248	1176473	1189651	+	inside	1361	1361	NearestLocation	1.70518	5.11239	6.90547	WBGene00004880	smg-2
X0140	chrI	1214925	1215184	260	*	260	1214964	1217274	-	overlapEnd	2349	39	NearestLocation	2.13533	10.8947	13.1078	WBGene00195068	Y48G8AL.16
X0141	chrI	1224074	1224605	532	*	532	1223956	1229282	-	inside	5208	118	NearestLocation	2.32239	20.3706	23.3161	WBGene00021691	Y48G8AL.13
X0142	chrI	1225191	1225535	345	*	345	1223956	1229282	-	inside	4091	1235	NearestLocation	1.4813	7.47775	9.42882	WBGene00021691	Y48G8AL.13
X0143	chrI	1226400	1226906	507	*	507	1223956	1229282	-	inside	2882	2376	NearestLocation	1.85888	8.45895	10.4929	WBGene00021691	Y48G8AL.13
X0144	chrI	1227168	1228191	1024	*	1024	1223956	1229282	-	inside	2114	1091	NearestLocation	1.67036	4.23788	5.95375	WBGene00021691	Y48G8AL.13
X0145	chrI	1230636	1230951	316	*	316	1223956	1229282	-	upstream	-1354	1354	NearestLocation	1.95908	7.54716	9.51205	WBGene00021691	Y48G8AL.13
X0146	chrI	1250377	1250701	325	*	325	1251252	1251322	-	downstream	945	551	NearestLocation	1.57051	2.54953	4.12024	WBGene00201777	Y48G8AL.19
X0147	chrI	1254317	1254586	270	*	270	1254770	1258227	+	upstream	-453	184	NearestLocation	1.74513	10.6716	12.8668	WBGene00021692	Y48G8AL.15
X0148	chrI	1264855	1265103	249	*	249	1259489	1268155	-	inside	3300	3052	NearestLocation	1.54093	5.36846	7.18156	WBGene00001707	grh-1
X0149	chrI	1270882	1271300	419	*	419	1259489	1268155	-	upstream	-2727	2727	NearestLocation	1.32663	3.52711	5.17252	WBGene00001707	grh-1
X0150	chrI	1299020	1299678	659	*	659	1305575	1328228	+	upstream	-6555	5897	NearestLocation	2.03722	6.83368	8.73697	WBGene00003400	dapk-1
X0151	chrI	1301160	1301664	505	*	505	1305575	1328228	+	upstream	-4415	3911	NearestLocation	1.95921	6.40992	8.29712	WBGene00003400	dapk-1
X0152	chrI	1303514	1303836	323	*	323	1305575	1328228	+	upstream	-2061	1739	NearestLocation	2.42646	11.7677	14.042	WBGene00003400	dapk-1
X0153	chrI	1312363	1313016	654	*	654	1307480	1307624	-	upstream	-4739	4739	NearestLocation	1.88886	6.8163	8.71938	WBGene00197361	K12C11.8
X0154	chrI	1316057	1316348	292	*	292	1307480	1307624	-	upstream	-8433	8433	NearestLocation	1.76338	8.71785	10.775	WBGene00197361	K12C11.8
X0155	chrI	1337949	1338767	819	*	819	1338785	1339769	+	upstream	-836	18	NearestLocation	1.81782	12.7908	15.1405	WBGene00045053	K12C11.7
X0156	chrI	1339210	1339483	274	*	274	1338785	1339769	+	inside	425	286	NearestLocation	1.58925	10.6632	12.8561	WBGene00045053	K12C11.7
X0157	chrI	1340810	1341102	293	*	293	1340678	1341258	+	inside	132	132	NearestLocation	1.506	3.04533	4.65858	WBGene00004888	smo-1
X0158	chrI	1341383	1341668	286	*	286	1340678	1341258	+	downstream	705	125	NearestLocation	1.8806	12.4786	14.8053	WBGene00004888	smo-1
X0159	chrI	1343997	1344616	620	*	620	1341220	1344692	-	inside	695	76	NearestLocation	2.08333	12.7773	15.1355	WBGene00019673	K12C11.1
X0160	chrI	1347225	1347781	557	*	557	1348503	1359595	+	upstream	-1278	722	NearestLocation	1.6078	2.23894	3.77686	WBGene00022363	Y92H12BL.1
X0161	chrI	1358146	1358492	347	*	347	1365309	1375883	+	upstream	-7163	6817	NearestLocation	1.96663	5.64661	7.47647	WBGene00022366	Y92H12BL.5
X0162	chrI	1359197	1359461	265	*	265	1365309	1375883	+	upstream	-6112	5848	NearestLocation	1.48056	1.25177	2.6778	WBGene00022366	Y92H12BL.5
X0163	chrI	1360600	1360977	378	*	378	1365309	1375883	+	upstream	-4709	4332	NearestLocation	1.69838	2.99821	4.61172	WBGene00022366	Y92H12BL.5
X0164	chrI	1361429	1362068	640	*	640	1365309	1375883	+	upstream	-3880	3241	NearestLocation	1.895	5.69935	7.50723	WBGene00022366	Y92H12BL.5
X0165	chrI	1365325	1366012	688	*	688	1365309	1375883	+	inside	16	16	NearestLocation	1.73633	9.37878	11.478	WBGene00022366	Y92H12BL.5
X0166	chrI	1367835	1368154	320	*	320	1365309	1375883	+	inside	2526	2526	NearestLocation	1.71423	14.0459	16.4954	WBGene00022366	Y92H12BL.5
X0167	chrI	1368494	1368801	308	*	308	1365309	1375883	+	inside	3185	3185	NearestLocation	1.63976	11.8542	14.1362	WBGene00022366	Y92H12BL.5
X0168	chrI	1370687	1371333	647	*	647	1365309	1375883	+	inside	5378	4550	NearestLocation	2.00183	13.137	15.5288	WBGene00022366	Y92H12BL.5
X0169	chrI	1373641	1373998	358	*	358	1365309	1375883	+	inside	8332	1885	NearestLocation	1.81656	9.06971	11.1463	WBGene00022366	Y92H12BL.5
X0170	chrI	1392557	1392987	431	*	431	1386257	1392759	-	overlapStart	202	202	NearestLocation	1.43361	7.32959	9.26503	WBGene00022367	Y92H12BM.1
X0171	chrI	1415476	1415761	286	*	286	1413915	1415809	-	inside	333	48	NearestLocation	1.82293	5.002	6.78613	WBGene00022368	Y92H12BR.2
X0172	chrI	1443571	1443820	250	*	250	1442048	1444133	-	inside	562	313	NearestLocation	2.10959	11.1717	13.4014	WBGene00018159	F37F2.2
X0173	chrI	1444118	1444573	456	*	456	1442048	1444133	-	overlapStart	15	15	NearestLocation	1.34096	5.15379	6.93821	WBGene00018159	F37F2.2
X0174	chrI	1446069	1446328	260	*	260	1446666	1465340	+	upstream	-597	338	NearestLocation	1.89357	9.35621	11.4515	WBGene00004969	spe-15
X0175	chrI	1458469	1458854	386	*	386	1451122	1453077	-	upstream	-5392	5392	NearestLocation	1.69608	9.39813	11.4994	WBGene00001773	gst-25
X0176	chrI	1459740	1460210	471	*	471	1465597	1469586	+	upstream	-5857	5387	NearestLocation	1.59666	9.26011	11.3373	WBGene00018580	F47G6.3
X0177	chrI	1481105	1481351	247	*	247	1483083	1491280	+	upstream	-1978	1732	NearestLocation	1.8014	5.72329	7.55894	WBGene00001115	dyb-1
X0178	chrI	1514156	1514417	262	*	262	1491340	1514409	-	overlapStart	253	8	NearestLocation	1.99679	13.6366	16.0517	WBGene00022361	Y92H12A.5
X0179	chrI	1535746	1536220	475	*	475	1543525	1556195	+	upstream	-7779	7305	NearestLocation	1.71013	5.30892	7.10685	WBGene00022358	Y92H12A.2
X0180	chrI	1538410	1538884	475	*	475	1543525	1556195	+	upstream	-5115	4641	NearestLocation	1.61497	2.16183	3.69444	WBGene00022358	Y92H12A.2
X0181	chrI	1541373	1541646	274	*	274	1543525	1556195	+	upstream	-2152	1879	NearestLocation	1.58017	2.68602	4.267	WBGene00022358	Y92H12A.2
X0182	chrI	1542430	1542788	359	*	359	1543525	1556195	+	upstream	-1095	737	NearestLocation	2.22307	10.0592	12.2054	WBGene00022358	Y92H12A.2
X0183	chrI	1545542	1545802	261	*	261	1543525	1556195	+	inside	2017	2017	NearestLocation	1.53616	8.13803	10.1461	WBGene00022358	Y92H12A.2
X0184	chrI	1547588	1548219	632	*	632	1543525	1556195	+	inside	4063	4063	NearestLocation	1.78678	6.54943	8.44493	WBGene00022358	Y92H12A.2
X0185	chrI	1552869	1553192	324	*	324	1556641	1556661	-	downstream	3792	3449	NearestLocation	1.82441	6.97592	8.90242	WBGene00172419	21ur-12465
X0186	chrI	1559052	1559327	276	*	276	1556641	1556661	-	upstream	-2391	2391	NearestLocation	1.42371	6.86636	8.79096	WBGene00172419	21ur-12465
X0187	chrI	1560253	1561165	913	*	913	1556641	1556661	-	upstream	-3592	3592	NearestLocation	1.51246	1.90843	3.41052	WBGene00172419	21ur-12465
X0188	chrI	1564709	1565043	335	*	335	1566931	1580196	+	upstream	-2222	1888	NearestLocation	1.56416	1.87231	3.37266	WBGene00005077	src-1
X0189	chrI	1574453	1574714	262	*	262	1575720	1575792	+	upstream	-1267	1006	NearestLocation	1.65599	5.33062	7.13674	WBGene00023198	Y92H12A.t1
X0190	chrI	1577480	1577801	322	*	322	1575714	1575803	-	upstream	-1677	1677	NearestLocation	1.86155	4.55293	6.2949	WBGene00195355	Y92H12A.8
X0191	chrI	1579010	1579289	280	*	280	1575714	1575803	-	upstream	-3207	3207	NearestLocation	2.05729	9.44064	11.5451	WBGene00195355	Y92H12A.8
X0192	chrI	1580378	1581215	838	*	838	1584329	1593668	+	upstream	-3951	3114	NearestLocation	1.80855	4.18191	5.88364	WBGene00022270	Y73E7A.3
X0193	chrI	1581514	1581783	270	*	270	1584329	1593668	+	upstream	-2815	2546	NearestLocation	1.89166	4.73981	6.49827	WBGene00022270	Y73E7A.3
X0194	chrI	1585212	1585468	257	*	257	1584329	1593668	+	inside	883	883	NearestLocation	1.60478	6.19182	8.06613	WBGene00022270	Y73E7A.3
X0195	chrI	1595742	1596197	456	*	456	1594656	1596175	-	overlapStart	433	22	NearestLocation	1.56382	2.57642	4.14384	WBGene00022271	cpx-1
X0196	chrI	1596979	1597336	358	*	358	1594656	1596175	-	upstream	-804	804	NearestLocation	2.28578	11.8854	14.1694	WBGene00022271	cpx-1
X0197	chrI	1598499	1599207	709	*	709	1600624	1601457	-	downstream	2958	1417	NearestLocation	1.90424	14.5625	17.067	WBGene00022272	Y73E7A.5
X0198	chrI	1599574	1599897	324	*	324	1600624	1601457	-	downstream	1883	727	NearestLocation	1.4944	5.03907	6.81379	WBGene00022272	Y73E7A.5
X0199	chrI	1610441	1610846	406	*	406	1610390	1619943	+	inside	51	51	NearestLocation	1.46838	5.82404	7.66496	WBGene00044440	adpr-1
X0200	chrI	1622678	1623095	418	*	418	1621351	1626605	-	inside	3927	1327	NearestLocation	1.67845	3.15219	4.77542	WBGene00000269	bre-4
X0201	chrI	1628855	1629216	362	*	362	1629003	1633496	+	overlapStart	-148	148	NearestLocation	1.9219	12.5173	14.8434	WBGene00022268	Y73E7A.1
X0202	chrI	1683019	1683294	276	*	276	1680450	1685063	+	inside	2569	1769	NearestLocation	1.59717	3.98518	5.68273	WBGene00022154	drag-1
X0203	chrI	1684011	1684285	275	*	275	1680450	1685063	+	inside	3561	778	NearestLocation	1.78656	9.92416	12.0608	WBGene00022154	drag-1
X0204	chrI	1685578	1686204	627	*	627	1680450	1685063	+	downstream	5128	515	NearestLocation	1.57938	11.2114	13.4455	WBGene00022154	drag-1
X0205	chrI	1687280	1687542	263	*	263	1691497	1691645	+	upstream	-4217	3955	NearestLocation	1.89432	9.95468	12.0968	WBGene00200707	Y71G12B.37
X0206	chrI	1687784	1688199	416	*	416	1691497	1691645	+	upstream	-3713	3298	NearestLocation	1.64335	11.4777	13.7222	WBGene00200707	Y71G12B.37
X0207	chrI	1691267	1691630	364	*	364	1691497	1691645	+	overlapStart	-230	15	NearestLocation	1.60296	11.8959	14.177	WBGene00200707	Y71G12B.37
X0208	chrI	1692545	1693297	753	*	753	1693190	1693457	+	overlapStart	-645	107	NearestLocation	1.45983	2.42506	3.97721	WBGene00220197	Y71G12B.41
X0209	chrI	1698358	1698896	539	*	539	1698094	1701130	+	inside	264	264	NearestLocation	1.47079	5.01343	6.77665	WBGene00006702	ubc-3
X0210	chrI	1699661	1699950	290	*	290	1701358	1701799	+	upstream	-1697	1408	NearestLocation	1.57139	10.0477	12.1954	WBGene00003080	lsm-6
X0211	chrI	1716010	1716299	290	*	290	1721592	1740918	+	upstream	-5582	5293	NearestLocation	1.69136	6.16106	8.02627	WBGene00006771	tln-1
X0212	chrI	1716505	1716810	306	*	306	1721592	1740918	+	upstream	-5087	4782	NearestLocation	1.85691	10.4458	12.6227	WBGene00006771	tln-1
X0213	chrI	1720521	1720771	251	*	251	1721592	1740918	+	upstream	-1071	821	NearestLocation	1.78875	11.8294	14.1068	WBGene00006771	tln-1
X0214	chrI	1740079	1740328	250	*	250	1738614	1738724	-	upstream	-1355	1355	NearestLocation	1.5437	7.4208	9.38186	WBGene00199017	Y71G12B.36
X0215	chrI	1750710	1751070	361	*	361	1740647	1751055	-	overlapStart	345	15	NearestLocation	1.91515	5.63702	7.45722	WBGene00022159	mppa-1
X0216	chrI	1751412	1751838	427	*	427	1751481	1754410	+	overlapStart	-69	69	NearestLocation	2.02779	6.85768	8.77882	WBGene00022150	Y71G12B.10
X0217	chrI	1772536	1772782	247	*	247	1771369	1775933	-	inside	3397	1167	NearestLocation	1.83609	4.41451	6.1498	WBGene00022160	Y71G12B.25
X0218	chrI	1777419	1777995	577	*	577	1771369	1775933	-	upstream	-1486	1486	NearestLocation	1.6563	8.68448	10.7333	WBGene00022160	Y71G12B.25
X0219	chrI	1808622	1808878	257	*	257	1808091	1811782	+	inside	531	531	NearestLocation	1.8609	7.81287	9.8035	WBGene00022144	pghm-1
X0220	chrI	1835445	1836039	595	*	595	1835679	1841921	+	overlapStart	-234	234	NearestLocation	1.28476	4.53072	6.26391	WBGene00001196	egl-30
X0221	chrI	1839750	1840024	275	*	275	1840679	1840745	-	downstream	995	655	NearestLocation	1.6584	10.6233	12.813	WBGene00202110	M01D7.10
X0222	chrI	1842724	1843021	298	*	298	1842445	1843227	+	inside	279	206	NearestLocation	1.49347	7.07668	9.01063	WBGene00001309	emr-1
X0223	chrI	1843295	1843864	570	*	570	1843353	1843969	+	overlapStart	-58	58	NearestLocation	1.52964	7.96461	9.94958	WBGene00003750	nlp-12
X0224	chrI	1867659	1867948	290	*	290	1862612	1872306	-	inside	4647	4358	NearestLocation	1.701	9.00687	11.0829	WBGene00004743	scm-1
X0225	chrI	1874459	1874769	311	*	311	1874147	1884173	+	inside	312	312	NearestLocation	1.39018	7.83343	9.81693	WBGene00022139	tub-2
X0226	chrI	1878784	1879088	305	*	305	1874147	1884173	+	inside	4637	4637	NearestLocation	1.58048	11.5651	13.8304	WBGene00022139	tub-2
X0227	chrI	1894356	1894947	592	*	592	1885205	1894863	-	overlapStart	507	84	NearestLocation	1.61899	9.64567	11.7693	WBGene00022140	Y71G12A.4
X0228	chrI	1911918	1912463	546	*	546	1911678	1913966	-	inside	2048	240	NearestLocation	1.5739	1.85022	3.34835	WBGene00021768	Y51F10.7
X0229	chrI	1913411	1913864	454	*	454	1911678	1913966	-	inside	555	102	NearestLocation	1.97553	9.10283	11.1847	WBGene00021768	Y51F10.7
X0230	chrI	1914615	1914861	247	*	247	1911678	1913966	-	upstream	-649	649	NearestLocation	1.70392	2.8956	4.50015	WBGene00021768	Y51F10.7
X0231	chrI	1915752	1915998	247	*	247	1916942	1917064	-	downstream	1312	944	NearestLocation	1.53907	2.06652	3.58909	WBGene00219760	anr-19
X0232	chrI	1917895	1918247	353	*	353	1916942	1917064	-	upstream	-831	831	NearestLocation	1.6216	4.86326	6.63112	WBGene00219760	anr-19
X0233	chrI	1919829	1920081	253	*	253	1916942	1917064	-	upstream	-2765	2765	NearestLocation	1.62631	2.45721	4.02119	WBGene00219760	anr-19
X0234	chrI	1958467	1958714	248	*	248	1958707	1964972	+	overlapStart	-240	7	NearestLocation	1.47393	6.80233	8.71469	WBGene00044438	Y51F10.11
X0235	chrI	1981218	1981688	471	*	471	1978004	1983436	+	inside	3214	1748	NearestLocation	1.38592	2.29859	3.84593	WBGene00021763	Y51F10.2
X0236	chrI	2009962	2010229	268	*	268	1988723	2010479	-	inside	517	250	NearestLocation	1.78662	3.77565	5.45504	WBGene00021238	gap-3
X0237	chrI	2011643	2011961	319	*	319	1988723	2010479	-	upstream	-1164	1164	NearestLocation	2.03413	8.31979	10.3346	WBGene00021238	gap-3
X0238	chrI	2018646	2019467	822	*	822	2019432	2019523	+	overlapStart	-786	35	NearestLocation	1.95482	7.57311	9.5301	WBGene00220136	Y20F4.11
X0239	chrI	2020236	2021295	1060	*	1060	2019432	2019523	+	downstream	804	713	NearestLocation	1.91476	10.0771	12.2332	WBGene00220136	Y20F4.11
X0240	chrI	2022460	2023243	784	*	784	2019432	2019523	+	downstream	3028	2937	NearestLocation	2.11891	12.5652	14.9187	WBGene00220136	Y20F4.11
X0241	chrI	2024012	2024696	685	*	685	2026316	2033948	+	upstream	-2304	1620	NearestLocation	1.86662	5.14428	6.91853	WBGene00021237	crtc-1
X0242	chrI	2025176	2025928	753	*	753	2026316	2033948	+	upstream	-1140	388	NearestLocation	1.70729	3.1609	4.78169	WBGene00021237	crtc-1
X0243	chrI	2026561	2026872	312	*	312	2026316	2033948	+	inside	245	245	NearestLocation	1.98453	7.97692	9.97666	WBGene00021237	crtc-1
X0244	chrI	2030490	2030760	271	*	271	2026316	2033948	+	inside	4174	3188	NearestLocation	2.07855	18.5446	21.3423	WBGene00021237	crtc-1
X0245	chrI	2031401	2031647	247	*	247	2026316	2033948	+	inside	5085	2301	NearestLocation	1.5806	9.81637	11.9528	WBGene00021237	crtc-1
X0246	chrI	2065177	2065715	539	*	539	2065727	2069049	+	upstream	-550	12	NearestLocation	1.53972	8.42283	10.4521	WBGene00021349	arl-13
X0247	chrI	2068569	2068815	247	*	247	2068818	2068951	-	downstream	382	3	NearestLocation	1.59444	8.75755	10.8161	WBGene00195672	Y37E3.26
X0248	chrI	2069106	2069564	459	*	459	2069041	2069587	-	inside	481	23	NearestLocation	1.28217	3.37145	5.01492	WBGene00004409	rla-1
X0249	chrI	2069969	2070697	729	*	729	2069884	2070023	-	overlapStart	54	54	NearestLocation	1.90524	13.777	16.202	WBGene00044932	Y37E3.22
X0250	chrI	2071273	2072371	1099	*	1099	2071352	2072547	+	overlapStart	-79	79	NearestLocation	1.62293	9.90007	12.0514	WBGene00004014	phb-1
X0251	chrI	2074449	2074756	308	*	308	2072680	2076906	+	inside	1769	1769	NearestLocation	1.71423	13.7882	16.2109	WBGene00021351	Y37E3.10
X0252	chrI	2076920	2077183	264	*	264	2078959	2085678	+	upstream	-2039	1776	NearestLocation	1.59018	10.0057	12.1523	WBGene00021352	Y37E3.11
X0253	chrI	2077841	2078161	321	*	321	2078959	2085678	+	upstream	-1118	798	NearestLocation	1.67558	3.40292	5.05417	WBGene00021352	Y37E3.11
X0254	chrI	2082077	2082330	254	*	254	2084806	2085027	-	downstream	2950	2476	NearestLocation	1.79806	4.95694	6.73462	WBGene00200606	Y37E3.29
X0255	chrI	2082723	2083068	346	*	346	2084806	2085027	-	downstream	2304	1738	NearestLocation	2.0949	9.3192	11.4149	WBGene00200606	Y37E3.29
X0256	chrI	2085606	2085863	258	*	258	2085037	2085155	+	downstream	569	451	NearestLocation	1.64139	7.78123	9.77129	WBGene00044925	Y37E3.20
X0257	chrI	2115363	2115642	280	*	280	2113655	2118550	-	inside	3187	1708	NearestLocation	1.68058	4.25169	5.97514	WBGene00021354	fpn-1.1
X0258	chrI	2117163	2117674	512	*	512	2113655	2118550	-	inside	1387	876	NearestLocation	1.51692	2.90311	4.50086	WBGene00021354	fpn-1.1
X0259	chrI	2118843	2119217	375	*	375	2113655	2118550	-	upstream	-293	293	NearestLocation	2.0684	7.11484	9.04578	WBGene00021354	fpn-1.1
X0260	chrI	2120057	2120645	589	*	589	2113655	2118550	-	upstream	-1507	1507	NearestLocation	1.65768	2.57691	4.14272	WBGene00021354	fpn-1.1
X0261	chrI	2126890	2127708	819	*	819	2128590	2145968	+	upstream	-1700	882	NearestLocation	1.63602	2.53178	4.10264	WBGene00021355	Y37E3.17
X0262	chrI	2168021	2168452	432	*	432	2160042	2209635	+	inside	7979	7979	NearestLocation	1.32549	4.34401	6.06743	WBGene00021009	afd-1
X0263	chrI	2176561	2176827	267	*	267	2160042	2209635	+	inside	16519	16519	NearestLocation	1.56565	4.71764	6.4792	WBGene00021009	afd-1
X0264	chrI	2182942	2183200	259	*	259	2160042	2209635	+	inside	22900	22900	NearestLocation	1.677	5.85415	7.70176	WBGene00021009	afd-1
X0265	chrI	2184552	2184809	258	*	258	2160042	2209635	+	inside	24510	24510	NearestLocation	1.56059	8.74539	10.8013	WBGene00021009	afd-1
X0266	chrI	2189741	2190404	664	*	664	2216100	2219442	+	upstream	-26359	25696	NearestLocation	1.60789	2.3351	3.8812	WBGene00021008	W03F11.5
X0267	chrI	2190677	2190991	315	*	315	2216100	2219442	+	upstream	-25423	25109	NearestLocation	1.61737	2.5546	4.12724	WBGene00021008	W03F11.5
X0268	chrI	2192510	2192762	253	*	253	2216100	2219442	+	upstream	-23590	23338	NearestLocation	1.43669	6.53134	8.42201	WBGene00021008	W03F11.5
X0269	chrI	2210563	2210903	341	*	341	2216100	2219442	+	upstream	-5537	5197	NearestLocation	1.47038	2.61238	4.18957	WBGene00021008	W03F11.5
X0270	chrI	2248735	2249007	273	*	273	2250131	2254901	+	upstream	-1396	1124	NearestLocation	1.95285	5.48855	7.30048	WBGene00017398	slc-17.6
X0271	chrI	2254092	2254418	327	*	327	2250131	2254901	+	inside	3961	483	NearestLocation	1.26183	3.07412	4.69155	WBGene00017398	slc-17.6
X0272	chrI	2273066	2273433	368	*	368	2255923	2272866	-	upstream	-200	200	NearestLocation	1.51283	8.20677	10.2243	WBGene00000020	abt-2
X0273	chrI	2290713	2291149	437	*	437	2281114	2291183	-	inside	470	34	NearestLocation	1.78708	6.40374	8.28958	WBGene00000408	cdk-7
X0274	chrI	2291694	2292000	307	*	307	2281114	2291183	-	upstream	-511	511	NearestLocation	1.44707	1.92732	3.43164	WBGene00000408	cdk-7
X0275	chrI	2293261	2293513	253	*	253	2293132	2297312	+	inside	129	129	NearestLocation	1.41168	5.37712	7.19054	WBGene00021469	Y39G10AR.11
X0276	chrI	2308048	2308479	432	*	432	2308976	2312130	+	upstream	-928	497	NearestLocation	1.39167	1.97084	3.48363	WBGene00021476	nsun-4
X0277	chrI	2312365	2312761	397	*	397	2312496	2313008	+	overlapStart	-131	131	NearestLocation	1.37248	5.40096	7.20556	WBGene00021475	tbca-1
X0278	chrI	2404599	2404872	274	*	274	2402232	2409987	+	inside	2367	2367	NearestLocation	1.37654	6.23211	8.10512	WBGene00021460	zwl-1
X0279	chrI	2418525	2419220	696	*	696	2418450	2420404	-	inside	1879	75	NearestLocation	1.47577	5.46134	7.26896	WBGene00017734	F23C8.5
X0280	chrI	2419549	2420070	522	*	522	2418450	2420404	-	inside	855	334	NearestLocation	1.26659	3.39655	5.04232	WBGene00017734	F23C8.5
X0281	chrI	2420852	2421484	633	*	633	2420831	2421742	-	inside	890	21	NearestLocation	1.48777	10.5909	12.7898	WBGene00017735	did-2
X0282	chrI	2431837	2432087	251	*	251	2429683	2432603	-	inside	766	516	NearestLocation	1.85143	7.12597	9.06195	WBGene00017737	F23C8.8
X0283	chrI	2433903	2434337	435	*	435	2434004	2435709	+	overlapStart	-101	101	NearestLocation	1.46029	8.79155	10.8478	WBGene00017733	ubxn-1
X0284	chrI	2478620	2478868	249	*	249	2483203	2483728	+	upstream	-4583	4335	NearestLocation	1.53597	4.58564	6.32826	WBGene00022282	Y74C10AR.2
X0285	chrI	2483144	2483406	263	*	263	2483203	2483728	+	overlapStart	-59	59	NearestLocation	1.78228	6.33779	8.21909	WBGene00022282	Y74C10AR.2
X0286	chrI	2485839	2486109	271	*	271	2485868	2489773	+	overlapStart	-29	29	NearestLocation	1.56023	2.99636	4.61254	WBGene00001232	eif-3.I
X0287	chrI	2486736	2487031	296	*	296	2485868	2489773	+	inside	868	868	NearestLocation	1.75304	8.79948	10.8622	WBGene00001232	eif-3.I
X0288	chrI	2490279	2490525	247	*	247	2489976	2497383	+	inside	303	303	NearestLocation	1.42466	5.47832	7.29632	WBGene00021277	Y23H5B.6
X0289	chrI	2518895	2519337	443	*	443	2514168	2514311	-	upstream	-4584	4584	NearestLocation	1.62734	2.52165	4.08567	WBGene00045093	Y23H5B.10
X0290	chrI	2532409	2532799	391	*	391	2533268	2542092	+	upstream	-859	469	NearestLocation	1.75972	5.53301	7.35275	WBGene00021275	dmsr-2
X0291	chrI	2573721	2574192	472	*	472	2571776	2576020	-	inside	2299	1828	NearestLocation	1.52274	4.07837	5.78004	WBGene00000006	aat-5
X0292	chrI	2578175	2578945	771	*	771	2571776	2576020	-	upstream	-2155	2155	NearestLocation	1.64768	2.64272	4.21464	WBGene00000006	aat-5
X0293	chrI	2585861	2586431	571	*	571	2580935	2586124	-	overlapStart	263	263	NearestLocation	1.55735	10.5974	12.7848	WBGene00001404	fbp-1
X0294	chrI	2586695	2587251	557	*	557	2580935	2586124	-	upstream	-571	571	NearestLocation	1.95217	9.78358	11.9016	WBGene00001404	fbp-1
X0295	chrI	2598759	2599730	972	*	972	2599979	2602649	+	upstream	-1220	249	NearestLocation	1.58783	5.46535	7.26762	WBGene00019461	K07A3.3
X0296	chrI	2604046	2604525	480	*	480	2605283	2605605	+	upstream	-1237	758	NearestLocation	1.60294	11.8665	14.1444	WBGene00201499	K07A3.5
X0297	chrI	2605390	2605649	260	*	260	2605283	2605605	-	overlapStart	215	44	NearestLocation	1.49762	9.98441	12.1273	WBGene00201331	K07A3.4
X0298	chrI	2606654	2606953	300	*	300	2606754	2617361	+	overlapStart	-100	100	NearestLocation	1.9236	12.3958	14.714	WBGene00000832	ctn-1
X0299	chrI	2632619	2632865	247	*	247	2632987	2634641	+	upstream	-368	122	NearestLocation	1.40965	5.7572	7.60097	WBGene00023172	Y23H5A.8
X0300	chrI	2656758	2657120	363	*	363	2656826	2657013	+	includeFeature	-68	68	NearestLocation	1.50728	2.51016	4.07643	WBGene00197940	F40E3.8
X0301	chrI	2659139	2659634	496	*	496	2645266	2657241	-	upstream	-1898	1898	NearestLocation	1.68673	14.5796	17.0791	WBGene00018232	F40E3.5
X0302	chrI	2664447	2664755	309	*	309	2666384	2666468	+	upstream	-1937	1629	NearestLocation	1.87212	22.118	25.2089	WBGene00219930	F32B5.17
X0303	chrI	2665351	2666425	1075	*	1075	2666384	2666468	+	overlapStart	-1033	41	NearestLocation	1.69651	6.39891	8.2641	WBGene00219930	F32B5.17
X0304	chrI	2666917	2667984	1068	*	1068	2668160	2672429	+	upstream	-1243	176	NearestLocation	1.93675	11.7758	14.0713	WBGene00017979	F32B5.6
X0305	chrI	2668711	2669114	404	*	404	2668160	2672429	+	inside	551	551	NearestLocation	1.49946	8.69813	10.7558	WBGene00017979	F32B5.6
X0306	chrI	2669394	2669659	266	*	266	2668160	2672429	+	inside	1234	1234	NearestLocation	1.37916	1.46308	2.91681	WBGene00017979	F32B5.6
X0307	chrI	2673154	2673457	304	*	304	2678059	2678205	+	upstream	-4905	4602	NearestLocation	1.49423	9.94007	12.0777	WBGene00198883	F32B5.12
X0308	chrI	2682479	2682798	320	*	320	2672947	2682797	-	overlapStart	318	1	NearestLocation	1.31536	4.98527	6.74804	WBGene00017980	F32B5.7
X0309	chrI	2683052	2683627	576	*	576	2682866	2683011	+	downstream	186	41	NearestLocation	1.47927	5.99022	7.84367	WBGene00199900	F32B5.13
X0310	chrI	2684400	2684723	324	*	324	2684865	2684995	+	upstream	-465	142	NearestLocation	1.56267	10.6688	12.8617	WBGene00200994	F32B5.14
X0311	chrI	2686903	2687719	817	*	817	2688947	2689069	+	upstream	-2044	1228	NearestLocation	1.46676	6.94921	8.86495	WBGene00044927	F32B5.9
X0312	chrI	2687994	2688280	287	*	287	2688947	2689069	+	upstream	-953	667	NearestLocation	1.82999	13.0607	15.4334	WBGene00044927	F32B5.9
X0313	chrI	2690073	2690415	343	*	343	2686639	2689473	-	upstream	-600	600	NearestLocation	1.56629	12.4672	14.7952	WBGene00000788	cpz-1
X0314	chrI	2725688	2726007	320	*	320	2726656	2727545	+	upstream	-968	649	NearestLocation	2.11313	13.2535	15.6424	WBGene00004920	snr-7
X0315	chrI	2729955	2730576	622	*	622	2730004	2731454	+	overlapStart	-49	49	NearestLocation	1.46716	8.14791	10.1579	WBGene00022127	yop-1
X0316	chrI	2761269	2761528	260	*	260	2759023	2761040	-	upstream	-229	229	NearestLocation	1.38712	7.38492	9.33904	WBGene00022130	Y71F9B.9
X0317	chrI	2762173	2762465	293	*	293	2759023	2761040	-	upstream	-1133	1133	NearestLocation	1.23539	2.44606	4.00111	WBGene00022130	Y71F9B.9
X0318	chrI	2774894	2775181	288	*	288	2774910	2775422	+	overlapStart	-16	16	NearestLocation	1.61078	11.1832	13.4155	WBGene00022125	Y71F9B.1
X0319	chrI	2776386	2776723	338	*	338	2761157	2776097	-	upstream	-289	289	NearestLocation	1.37068	2.83989	4.44054	WBGene00004946	sop-3
X0320	chrI	2777288	2777567	280	*	280	2776370	2778719	-	inside	1431	918	NearestLocation	1.63001	12.1692	14.4724	WBGene00022131	Y71F9B.13
X0321	chrI	2803224	2803500	277	*	277	2802822	2815786	+	inside	402	402	NearestLocation	1.44856	3.76836	5.44891	WBGene00002174	itx-1
X0322	chrI	2831353	2831645	293	*	293	2831450	2831599	-	includeFeature	246	46	NearestLocation	1.50063	10.392	12.568	WBGene00199081	W10C8.12
X0323	chrI	2855125	2855692	568	*	568	2855295	2855442	+	includeFeature	-170	170	NearestLocation	1.38716	3.18696	4.80772	WBGene00197182	W10C8.10
X0324	chrI	2857625	2858863	1239	*	1239	2858599	2859847	-	overlapEnd	2222	264	NearestLocation	1.73448	4.94751	6.70089	WBGene00044433	W10C8.6
X0325	chrI	2859177	2859917	741	*	741	2858599	2859847	-	overlapStart	670	70	NearestLocation	1.74406	6.24638	8.10605	WBGene00044433	W10C8.6
X0326	chrI	2860446	2860954	509	*	509	2858599	2859847	-	upstream	-599	599	NearestLocation	1.62184	2.92968	4.53937	WBGene00044433	W10C8.6
X0327	chrI	2863971	2864335	365	*	365	2864011	2864061	-	includeFeature	90	40	NearestLocation	1.2644	3.26994	4.90436	WBGene00200294	Y71F9AL.21
X0328	chrI	2867228	2867663	436	*	436	2866429	2870105	+	inside	799	799	NearestLocation	1.39267	4.46555	6.20271	WBGene00022115	Y71F9AL.10
X0329	chrI	2869946	2870366	421	*	421	2866429	2870105	+	overlapEnd	3517	159	NearestLocation	1.36774	1.37786	2.81917	WBGene00022115	Y71F9AL.10
X0330	chrI	2875498	2876164	667	*	667	2875395	2876324	-	inside	826	103	NearestLocation	1.49279	5.55305	7.36202	WBGene00004412	rpl-1
X0331	chrI	2877150	2877965	816	*	816	2876932	2878517	+	inside	218	218	NearestLocation	1.41796	7.47065	9.41668	WBGene00022114	Y71F9AL.9
X0332	chrI	2878972	2879261	290	*	290	2878578	2880936	+	inside	394	394	NearestLocation	1.76416	14.4001	16.8716	WBGene00022113	Y71F9AL.8
X0333	chrI	2896831	2897128	298	*	298	2883496	2893718	-	upstream	-3113	3113	NearestLocation	1.66701	3.62097	5.28746	WBGene00000199	arx-1
X0334	chrI	2897754	2898016	263	*	263	2895328	2900860	-	inside	3106	2426	NearestLocation	1.87676	9.04418	11.1239	WBGene00022119	copa-1
X0335	chrI	2900033	2900367	335	*	335	2895328	2900860	-	inside	827	493	NearestLocation	1.65069	9.6989	11.8195	WBGene00022119	copa-1
X0336	chrI	2926515	2926805	291	*	291	2924932	2928138	+	inside	1583	1333	NearestLocation	1.8575	9.00645	11.0821	WBGene00022107	Y71F9AL.1
X0337	chrI	2928088	2929343	1256	*	1256	2928395	2929679	+	overlapStart	-307	307	NearestLocation	1.42375	5.64054	7.46135	WBGene00022122	trap-1
X0338	chrI	2955991	2956592	602	*	602	2949609	2957876	-	inside	1885	1284	NearestLocation	1.87034	5.91214	7.75171	WBGene00000237	bam-2
X0339	chrI	2996115	2996369	255	*	255	2996406	3001378	+	upstream	-291	37	NearestLocation	1.54383	2.01571	3.53246	WBGene00001046	dnj-28
X0340	chrI	2996654	2996942	289	*	289	2996406	3001378	+	inside	248	248	NearestLocation	1.86157	11.4796	13.7323	WBGene00001046	dnj-28
X0341	chrI	3010042	3010614	573	*	573	3010493	3010618	+	overlapStart	-451	4	NearestLocation	1.39928	4.89453	6.65397	WBGene00197714	Y54E10BL.8
X0342	chrI	3011072	3011610	539	*	539	3010690	3011659	+	inside	382	49	NearestLocation	1.21621	2.06315	3.57955	WBGene00000625	col-48
X0343	chrI	3019011	3019807	797	*	797	3021649	3028384	+	upstream	-2638	1842	NearestLocation	1.85279	4.33462	6.06096	WBGene00021842	Y54E10BR.3
X0344	chrI	3035961	3036223	263	*	263	3032967	3034761	+	downstream	2994	1200	NearestLocation	1.942	15.5211	18.0782	WBGene00021841	Y54E10BR.2
X0345	chrI	3059080	3059329	250	*	250	3059251	3069393	+	overlapStart	-171	78	NearestLocation	1.52461	6.70347	8.60881	WBGene00021840	Y54E10BR.1
X0346	chrI	3069445	3070027	583	*	583	3069232	3070140	-	inside	695	113	NearestLocation	1.54053	9.08781	11.1485	WBGene00000205	arx-7
X0347	chrI	3085584	3085949	366	*	366	3070970	3084874	-	upstream	-710	710	NearestLocation	2.59937	16.2708	18.8954	WBGene00019697	M01B12.4
X0348	chrI	3087127	3087419	293	*	293	3070970	3084874	-	upstream	-2253	2253	NearestLocation	1.75936	11.3247	13.5668	WBGene00019697	M01B12.4
X0349	chrI	3098623	3099206	584	*	584	3099681	3099769	+	upstream	-1058	475	NearestLocation	1.68454	2.89168	4.49174	WBGene00197503	C45E1.7
X0350	chrI	3099658	3101183	1526	*	1526	3099681	3099769	+	includeFeature	-23	23	NearestLocation	1.62983	3.00905	4.61654	WBGene00197503	C45E1.7
X0351	chrI	3110661	3110911	251	*	251	3109648	3110672	-	overlapStart	11	11	NearestLocation	1.69966	11.4237	13.6739	WBGene00195056	C45E1.5
X0352	chrI	3111514	3111800	287	*	287	3109648	3110672	-	upstream	-842	842	NearestLocation	1.51813	6.66438	8.56991	WBGene00195056	C45E1.5
X0353	chrI	3112272	3112524	253	*	253	3109648	3110672	-	upstream	-1600	1600	NearestLocation	1.52173	4.21503	5.93002	WBGene00195056	C45E1.5
X0354	chrI	3112728	3113096	369	*	369	3109648	3110672	-	upstream	-2056	2056	NearestLocation	1.39306	2.82707	4.4234	WBGene00195056	C45E1.5
X0355	chrI	3115921	3116215	295	*	295	3116084	3116175	-	includeFeature	254	40	NearestLocation	1.44658	2.60693	4.18577	WBGene00197996	C45E1.8
X0356	chrI	3116766	3117331	566	*	566	3116084	3116175	-	upstream	-591	591	NearestLocation	1.40658	6.88711	8.81313	WBGene00197996	C45E1.8
X0357	chrI	3125307	3125858	552	*	552	3115036	3125145	-	upstream	-162	162	NearestLocation	1.96357	7.22888	9.15995	WBGene00016663	C45E1.4
X0358	chrI	3126782	3127108	327	*	327	3115036	3125145	-	upstream	-1637	1637	NearestLocation	1.98282	19.9187	22.8338	WBGene00016663	C45E1.4
X0359	chrI	3161280	3161593	314	*	314	3158514	3162376	-	inside	1096	783	NearestLocation	2.0766	12.2959	14.6101	WBGene00006888	vbh-1
X0360	chrI	3201942	3202200	259	*	259	3199540	3203229	-	inside	1287	1029	NearestLocation	1.80671	5.09692	6.88627	WBGene00021833	Y54E10A.13
X0361	chrI	3209452	3209717	266	*	266	3211046	3217365	+	upstream	-1594	1329	NearestLocation	1.96786	5.47329	7.29313	WBGene00001481	fog-1
X0362	chrI	3211442	3211701	260	*	260	3211046	3217365	+	inside	396	396	NearestLocation	1.44145	6.03336	7.89303	WBGene00001481	fog-1
X0363	chrI	3212036	3212511	476	*	476	3211046	3217365	+	inside	990	990	NearestLocation	1.77232	4.8133	6.55951	WBGene00001481	fog-1
X0364	chrI	3222755	3223004	250	*	250	3217288	3222950	-	overlapStart	195	54	NearestLocation	1.97468	6.00017	7.86173	WBGene00004404	rom-5
X0365	chrI	3242169	3242431	263	*	263	3244150	3246164	-	downstream	3995	1719	NearestLocation	1.79152	6.98047	8.91034	WBGene00021834	mab-31
X0366	chrI	3246344	3246715	372	*	372	3246221	3246370	+	overlapEnd	123	26	NearestLocation	1.57421	12.179	14.4902	WBGene00198001	Y54E10A.24
X0367	chrI	3247025	3247722	698	*	698	3248205	3248416	+	upstream	-1180	483	NearestLocation	1.44401	7.72495	9.67766	WBGene00199669	Y54E10A.25
X0368	chrI	3248161	3248791	631	*	631	3248205	3248416	+	includeFeature	-44	44	NearestLocation	1.42804	7.92133	9.90746	WBGene00199669	Y54E10A.25
X0369	chrI	3250494	3251123	630	*	630	3249391	3249478	+	downstream	1103	1016	NearestLocation	1.80425	9.92061	12.0613	WBGene00220179	Y54E10A.29
X0370	chrI	3265309	3265569	261	*	261	3264256	3266762	-	inside	1453	1053	NearestLocation	1.64588	9.1302	11.2167	WBGene00021552	zip-4
X0371	chrI	3267313	3267625	313	*	313	3267094	3269148	+	inside	219	219	NearestLocation	1.74439	5.21837	7.01614	WBGene00020915	nol-5
X0372	chrI	3268011	3268589	579	*	579	3267094	3269148	+	inside	917	559	NearestLocation	1.61558	7.01796	8.94466	WBGene00020915	nol-5
X0373	chrI	3269570	3269820	251	*	251	3267094	3269148	+	downstream	2476	422	NearestLocation	1.50542	6.09894	7.96564	WBGene00020915	nol-5
X0374	chrI	3276619	3276903	285	*	285	3280163	3280267	+	upstream	-3544	3260	NearestLocation	1.72855	3.71008	5.38277	WBGene00196791	W01B11.7
X0375	chrI	3293231	3293523	293	*	293	3293168	3294356	-	inside	1125	63	NearestLocation	2.11458	8.21282	10.2245	WBGene00020917	W01B11.6
X0376	chrI	3296488	3296851	364	*	364	3293168	3294356	-	upstream	-2132	2132	NearestLocation	2.36163	10.8844	13.0937	WBGene00020917	W01B11.6
X0377	chrI	3297862	3298164	303	*	303	3299606	3300490	+	upstream	-1744	1442	NearestLocation	1.5847	1.90941	3.41702	WBGene00020913	W01B11.1
X0378	chrI	3298488	3299056	569	*	569	3299606	3300490	+	upstream	-1118	550	NearestLocation	1.88779	4.954	6.72934	WBGene00020913	W01B11.1
X0379	chrI	3299609	3299857	249	*	249	3299606	3300490	+	inside	3	3	NearestLocation	1.62497	11.4872	13.742	WBGene00020913	W01B11.1
X0380	chrI	3312500	3312943	444	*	444	3302092	3307465	-	upstream	-5035	5035	NearestLocation	2.00419	6.08368	7.93999	WBGene00000036	ace-2
X0381	chrI	3323635	3323912	278	*	278	3317978	3318586	-	upstream	-5049	5049	NearestLocation	1.93145	6.70753	8.61773	WBGene00021548	trx-4
X0382	chrI	3327871	3328160	290	*	290	3319853	3330673	-	inside	2802	2513	NearestLocation	2.09536	11.0925	13.3186	WBGene00021549	Y44E3A.4
X0383	chrI	3328678	3328927	250	*	250	3319853	3330673	-	inside	1995	1746	NearestLocation	1.58915	7.99106	9.99423	WBGene00021549	Y44E3A.4
X0384	chrI	3330849	3331133	285	*	285	3319853	3330673	-	upstream	-176	176	NearestLocation	1.83433	6.98257	8.90156	WBGene00021549	Y44E3A.4
X0385	chrI	3332172	3332438	267	*	267	3319853	3330673	-	upstream	-1499	1499	NearestLocation	1.65212	4.19301	5.9081	WBGene00021549	Y44E3A.4
X0386	chrI	3335936	3336199	264	*	264	3338367	3340219	+	upstream	-2431	2168	NearestLocation	1.75121	8.43131	10.4632	WBGene00021547	Y44E3A.1
X0387	chrI	3338319	3338590	272	*	272	3338367	3340219	+	overlapStart	-48	48	NearestLocation	1.57951	7.44921	9.41386	WBGene00021547	Y44E3A.1
X0388	chrI	3423153	3423407	255	*	255	3419600	3424211	+	inside	3553	804	NearestLocation	1.68122	7.55947	9.53107	WBGene00019361	K03E5.2
X0389	chrI	3438247	3438493	247	*	247	3433157	3438543	-	inside	296	50	NearestLocation	1.58201	2.23013	3.76919	WBGene00004775	sep-1
X0390	chrI	3466565	3467327	763	*	763	3467132	3477971	+	overlapStart	-567	195	NearestLocation	1.65606	2.55724	4.12483	WBGene00004978	spg-7
X0391	chrI	3500781	3501083	303	*	303	3487812	3499706	-	upstream	-1075	1075	NearestLocation	1.55056	11.89	14.1748	WBGene00021643	ccep-290
X0392	chrI	3514407	3514689	283	*	283	3508635	3512733	-	upstream	-1674	1674	NearestLocation	1.68823	13.322	15.7106	WBGene00021644	Y47G6A.18
X0393	chrI	3546724	3546978	255	*	255	3539043	3546904	-	overlapStart	180	74	NearestLocation	1.51096	6.04297	7.90504	WBGene00004389	rnp-6
X0394	chrI	3552306	3552555	250	*	250	3553556	3553607	+	upstream	-1250	1001	NearestLocation	2.20606	14.7855	17.2931	WBGene00200046	Y47G6A.34
X0395	chrI	3562552	3562865	314	*	314	3559917	3562851	-	overlapStart	299	14	NearestLocation	1.80127	13.6306	16.0457	WBGene00021647	Y47G6A.22
X0396	chrI	3563279	3564023	745	*	745	3564064	3565066	+	upstream	-785	41	NearestLocation	1.66657	2.74268	4.32194	WBGene00045399	Y47G6A.33
X0397	chrI	3646073	3646349	277	*	277	3641705	3647009	-	inside	936	660	NearestLocation	1.71183	3.31842	4.96272	WBGene00000368	ccb-1
X0398	chrI	3649327	3649590	264	*	264	3641705	3647009	-	upstream	-2318	2318	NearestLocation	1.89359	10.6357	12.8261	WBGene00000368	ccb-1
X0399	chrI	3673222	3673505	284	*	284	3667124	3671700	-	upstream	-1522	1522	NearestLocation	1.9681	7.66247	9.64147	WBGene00004890	smp-2
X0400	chrI	3680419	3680714	296	*	296	3680178	3680944	-	inside	525	230	NearestLocation	1.79818	12.2411	14.5509	WBGene00001501	ftn-2
X0401	chrI	3683316	3683633	318	*	318	3682893	3684118	-	inside	802	423	NearestLocation	1.57834	8.09315	10.0997	WBGene00004272	rab-8
X0402	chrI	3718802	3719181	380	*	380	3713139	3721157	-	inside	2355	1976	NearestLocation	1.31187	4.12978	5.82993	WBGene00003040	lin-59
X0403	chrI	3720922	3721193	272	*	272	3713139	3721157	-	overlapStart	235	36	NearestLocation	1.61066	12.9077	15.2692	WBGene00003040	lin-59
X0404	chrI	3723409	3723681	273	*	273	3713139	3721157	-	upstream	-2252	2252	NearestLocation	1.57344	13.3301	15.7223	WBGene00003040	lin-59
X0405	chrI	3735635	3735890	256	*	256	3731352	3732922	+	downstream	4283	2713	NearestLocation	1.53554	3.41113	5.05657	WBGene00020467	T12F5.2
X0406	chrI	3737251	3737560	310	*	310	3732982	3740479	-	inside	3228	2919	NearestLocation	2.15197	15.8001	18.3805	WBGene00004147	larp-5
X0407	chrI	3738045	3738837	793	*	793	3732982	3740479	-	inside	2434	1642	NearestLocation	1.66972	15.1712	17.7108	WBGene00004147	larp-5
X0408	chrI	3755875	3756128	254	*	254	3748524	3753958	-	upstream	-1917	1917	NearestLocation	1.60712	9.22239	11.3144	WBGene00002135	inx-13
X0409	chrI	3783908	3784247	340	*	340	3783835	3784435	+	inside	73	73	NearestLocation	1.92573	10.6722	12.864	WBGene00016322	C32E8.4
X0410	chrI	3787016	3787280	265	*	265	3786594	3787495	+	inside	422	215	NearestLocation	1.52289	9.56997	11.6848	WBGene00016321	tppp-1
X0411	chrI	3787957	3788874	918	*	918	3788036	3788911	+	overlapStart	-79	37	NearestLocation	1.46303	7.7139	9.68533	WBGene00004425	rpl-13
X0412	chrI	3789391	3789683	293	*	293	3788036	3788911	+	downstream	1355	480	NearestLocation	1.73339	7.74296	9.7256	WBGene00004425	rpl-13
X0413	chrI	3799133	3799402	270	*	270	3794553	3798053	-	upstream	-1080	1080	NearestLocation	1.61325	5.78605	7.62644	WBGene00016325	C32E8.9
X0414	chrI	3805567	3805822	256	*	256	3798566	3805718	-	overlapStart	151	104	NearestLocation	1.62058	6.66958	8.57625	WBGene00006751	unc-11
X0415	chrI	3806500	3806824	325	*	325	3798566	3805718	-	upstream	-782	782	NearestLocation	1.82679	15.7733	18.3528	WBGene00006751	unc-11
X0416	chrI	3807093	3807452	360	*	360	3798566	3805718	-	upstream	-1375	1375	NearestLocation	1.56389	2.7597	4.34941	WBGene00006751	unc-11
X0417	chrI	3817765	3818023	259	*	259	3817996	3821503	+	overlapStart	-231	27	NearestLocation	1.49645	9.32748	11.4235	WBGene00003797	npp-11
X0418	chrI	3824970	3825363	394	*	394	3824947	3826514	+	inside	23	23	NearestLocation	1.75273	5.05609	6.83669	WBGene00006833	unc-108
X0419	chrI	3825612	3826192	581	*	581	3824947	3826514	+	inside	665	322	NearestLocation	2.1	13.7152	16.1393	WBGene00006833	unc-108
X0420	chrI	3827179	3827794	616	*	616	3827208	3828143	+	overlapStart	-29	29	NearestLocation	1.81852	14.8036	17.3253	WBGene00018765	F53F10.3
X0421	chrI	3829626	3829977	352	*	352	3828843	3829313	+	downstream	783	313	NearestLocation	1.80002	11.2713	13.5084	WBGene00023065	F53F10.6
X0422	chrI	3831051	3831517	467	*	467	3831117	3834124	+	overlapStart	-66	66	NearestLocation	1.64777	4.9473	6.72679	WBGene00018764	F53F10.2
X0423	chrI	3831930	3832487	558	*	558	3831117	3834124	+	inside	813	813	NearestLocation	1.48518	6.82783	8.73711	WBGene00018764	F53F10.2
X0424	chrI	3840401	3840708	308	*	308	3838237	3839899	-	upstream	-502	502	NearestLocation	1.70439	6.55198	8.44303	WBGene00020187	gsp-4
X0425	chrI	3860463	3860738	276	*	276	3854161	3859294	-	upstream	-1169	1169	NearestLocation	1.50057	1.66035	3.13588	WBGene00020189	tfbm-1
X0426	chrI	3861464	3861757	294	*	294	3859378	3862729	-	inside	1265	972	NearestLocation	1.77465	14.7521	17.2518	WBGene00020190	guk-1
X0427	chrI	3862397	3862690	294	*	294	3859378	3862729	-	inside	332	39	NearestLocation	1.71735	12.075	14.3751	WBGene00020190	guk-1
X0428	chrI	3867651	3868077	427	*	427	3867541	3869133	+	inside	110	110	NearestLocation	1.41056	1.55194	3.01595	WBGene00020185	pgk-1
X0429	chrI	3868514	3868877	364	*	364	3869219	3870124	+	upstream	-705	342	NearestLocation	1.44399	4.96453	6.73721	WBGene00000764	coq-4
X0430	chrI	3874437	3874703	267	*	267	3874037	3875996	+	inside	400	400	NearestLocation	1.59856	5.29827	7.10877	WBGene00020184	uba-5
X0431	chrI	3983336	3983884	549	*	549	3983171	3986915	+	inside	165	165	NearestLocation	1.58685	6.09754	7.96131	WBGene00000197	aars-2
X0432	chrI	3985816	3986301	486	*	486	3987891	3988702	+	upstream	-2075	1590	NearestLocation	1.6007	3.18062	4.80613	WBGene00000779	cpn-3
X0433	chrI	3991657	3991937	281	*	281	3987891	3988702	+	downstream	3766	2955	NearestLocation	2.14461	19.8575	22.7644	WBGene00000779	cpn-3
X0434	chrI	4004403	4004682	280	*	280	4005435	4006019	+	upstream	-1032	753	NearestLocation	1.66854	12.1734	14.477	WBGene00018868	F55C7.2
X0435	chrI	4006834	4007361	528	*	528	4005435	4006019	+	downstream	1399	815	NearestLocation	1.5067	2.27486	3.8167	WBGene00018868	F55C7.2
X0436	chrI	4011342	4011786	445	*	445	4017386	4017468	-	downstream	6126	5600	NearestLocation	1.69822	9.38844	11.483	WBGene00219973	F55C7.9
X0437	chrI	4012803	4013060	258	*	258	4017386	4017468	-	downstream	4665	4326	NearestLocation	1.55671	9.86184	11.998	WBGene00219973	F55C7.9
X0438	chrI	4131462	4131764	303	*	303	4129564	4132292	-	inside	830	528	NearestLocation	2.14616	11.104	13.331	WBGene00002696	let-504
X0439	chrI	4134854	4135110	257	*	257	4135240	4137074	-	downstream	2220	130	NearestLocation	1.7396	7.45854	9.42525	WBGene00017087	E01A2.5
X0440	chrI	4173377	4173677	301	*	301	4172464	4173624	-	overlapStart	247	53	NearestLocation	1.80032	5.46828	7.27982	WBGene00020036	R12E2.11
X0441	chrI	4177399	4177651	253	*	253	4177305	4178447	-	inside	1048	94	NearestLocation	1.62188	5.31789	7.1232	WBGene00020038	R12E2.13
X0442	chrI	4183912	4184176	265	*	265	4185060	4189930	+	upstream	-1148	884	NearestLocation	1.98057	7.20345	9.15204	WBGene00004093	ppw-1
X0443	chrI	4184738	4184984	247	*	247	4185060	4189930	+	upstream	-322	76	NearestLocation	1.52815	3.1169	4.74514	WBGene00004093	ppw-1
X0444	chrI	4221305	4221552	248	*	248	4214293	4215752	-	upstream	-5553	5553	NearestLocation	1.88893	10.4843	12.6695	WBGene00015976	C18E3.9
X0445	chrI	4296464	4296710	247	*	247	4295024	4296741	+	inside	1440	31	NearestLocation	1.77533	4.9204	6.6962	WBGene00219754	linc-85
X0446	chrI	4303821	4304092	272	*	272	4303930	4308244	+	overlapStart	-109	109	NearestLocation	1.75317	4.03115	5.73357	WBGene00021628	Y47D9A.1
X0447	chrI	4330570	4330820	251	*	251	4329116	4329239	-	upstream	-1331	1331	NearestLocation	1.64063	7.45514	9.42196	WBGene00200644	ZK973.23
X0448	chrI	4367837	4368086	250	*	250	4368089	4370504	+	upstream	-252	3	NearestLocation	1.66908	7.35065	9.31124	WBGene00022832	pdp-1
X0449	chrI	4375317	4375567	251	*	251	4373656	4379351	+	inside	1661	1661	NearestLocation	1.76721	3.90966	5.60229	WBGene00022831	cec-10
X0450	chrI	4436707	4436966	260	*	260	4428475	4444342	-	inside	7635	7376	NearestLocation	1.54586	10.7019	12.9003	WBGene00016562	C41D11.3
X0451	chrI	4455172	4455426	255	*	255	4451197	4456805	-	inside	1633	1379	NearestLocation	1.69851	5.67879	7.51501	WBGene00016566	eri-7
X0452	chrI	4477781	4478406	626	*	626	4479639	4479659	-	downstream	1878	1233	NearestLocation	1.82308	8.80134	10.8522	WBGene00173238	21ur-14920
X0453	chrI	4486094	4486348	255	*	255	4481238	4508930	+	inside	4856	4856	NearestLocation	1.82567	4.06966	5.77818	WBGene00020131	gcy-28
X0454	chrI	4491667	4491925	259	*	259	4494681	4494760	-	downstream	3093	2756	NearestLocation	1.56897	8.52784	10.5685	WBGene00220054	T01A4.8
X0455	chrI	4583685	4584296	612	*	612	4580692	4583810	-	overlapStart	125	125	NearestLocation	1.26118	2.96465	4.5758	WBGene00017003	D1007.5
X0456	chrI	4585588	4585864	277	*	277	4585874	4585983	+	upstream	-286	10	NearestLocation	1.47089	8.22388	10.238	WBGene00023452	mir-353
X0457	chrI	4635049	4635411	363	*	363	4634991	4635011	+	downstream	58	38	NearestLocation	1.41425	6.92312	8.83689	WBGene00170884	21ur-14833
X0458	chrI	4635863	4636286	424	*	424	4634991	4635011	+	downstream	872	852	NearestLocation	1.65948	3.33042	4.95288	WBGene00170884	21ur-14833
X0459	chrI	4646523	4647027	505	*	505	4645636	4646963	-	overlapStart	440	64	NearestLocation	1.45459	8.94964	11.0172	WBGene00004415	rpl-4
X0460	chrI	4654070	4654324	255	*	255	4653471	4660087	+	inside	599	599	NearestLocation	1.48619	4.20821	5.92448	WBGene00015007	ain-2
X0461	chrI	4655263	4655544	282	*	282	4653471	4660087	+	inside	1792	1792	NearestLocation	1.76027	14.1347	16.5893	WBGene00015007	ain-2
X0462	chrI	4672186	4672458	273	*	273	4665744	4671738	-	upstream	-448	448	NearestLocation	1.70321	6.85137	8.76837	WBGene00006961	xnp-1
X0463	chrI	4673938	4674390	453	*	453	4675135	4679409	+	upstream	-1197	745	NearestLocation	1.81542	5.72143	7.54714	WBGene00006791	unc-57
X0464	chrI	4686512	4686921	410	*	410	4684316	4684414	-	upstream	-2098	2098	NearestLocation	1.37853	4.64406	6.398	WBGene00003338	mir-244
X0465	chrI	4699581	4699854	274	*	274	4699610	4702866	+	overlapStart	-29	29	NearestLocation	1.61625	10.3968	12.573	WBGene00219746	linc-91
X0466	chrI	4745293	4745552	260	*	260	4745315	4745455	-	includeFeature	162	22	NearestLocation	1.66463	12.0607	14.3549	WBGene00195426	C10H11.11
X0467	chrI	4767461	4768094	634	*	634	4769694	4771361	+	upstream	-2233	1600	NearestLocation	1.74988	8.41039	10.4331	WBGene00019767	rpa-2
X0468	chrI	4770247	4770616	370	*	370	4769694	4771361	+	inside	553	553	NearestLocation	1.59234	4.61926	6.37065	WBGene00019767	rpa-2
X0469	chrI	4770842	4771176	335	*	335	4769694	4771361	+	inside	1148	185	NearestLocation	1.70144	6.37445	8.25377	WBGene00019767	rpa-2
X0470	chrI	4774132	4774379	248	*	248	4771486	4773047	-	upstream	-1085	1085	NearestLocation	1.64393	9.85949	11.9963	WBGene00019770	M04F3.4
X0471	chrI	4777863	4778140	278	*	278	4773818	4777717	-	upstream	-146	146	NearestLocation	1.54222	5.09565	6.88153	WBGene00019771	M04F3.5
X0472	chrI	4779671	4779938	268	*	268	4780230	4780323	-	downstream	652	292	NearestLocation	1.47336	4.12524	5.82595	WBGene00200104	F54D7.9
X0473	chrI	4803652	4804245	594	*	594	4805607	4809675	+	upstream	-1955	1362	NearestLocation	1.62694	2.51075	4.07187	WBGene00018797	F54D7.2
X0474	chrI	4906729	4907015	287	*	287	4906823	4911831	+	overlapStart	-94	94	NearestLocation	1.38718	5.08964	6.88132	WBGene00017671	pgal-1
X0475	chrI	4913779	4914187	409	*	409	4911803	4914047	-	overlapStart	268	140	NearestLocation	1.70274	17.8183	20.5722	WBGene00017675	F21F3.6
X0476	chrI	4914810	4916251	1442	*	1442	4911803	4914047	-	upstream	-763	763	NearestLocation	1.7014	5.22772	7.00997	WBGene00017675	F21F3.6
X0477	chrI	4917639	4917919	281	*	281	4918392	4920866	+	upstream	-753	473	NearestLocation	1.74805	13.9364	16.3733	WBGene00017676	F21F3.7
X0478	chrI	4934186	4934450	265	*	265	4934037	4949334	+	inside	149	149	NearestLocation	1.57694	7.84942	9.84623	WBGene00017885	dip-2
X0479	chrI	4937735	4937989	255	*	255	4934037	4949334	+	inside	3698	3698	NearestLocation	1.63532	9.35069	11.4563	WBGene00017885	dip-2
X0480	chrI	4941187	4941641	455	*	455	4934037	4949334	+	inside	7150	7150	NearestLocation	1.36597	3.56809	5.22923	WBGene00017885	dip-2
X0481	chrI	4977339	4977610	272	*	272	4975375	4975508	-	upstream	-1831	1831	NearestLocation	1.69109	6.58019	8.48177	WBGene00197411	W03G9.11
X0482	chrI	4995975	4996412	438	*	438	4996839	5003092	+	upstream	-864	427	NearestLocation	1.77132	4.14012	5.84476	WBGene00003221	mes-3
X0483	chrI	5023967	5024255	289	*	289	5023889	5041157	+	inside	78	78	NearestLocation	1.58215	10.0645	12.2151	WBGene00002979	lfe-2
X0484	chrI	5031847	5032576	730	*	730	5023889	5041157	+	inside	7958	7958	NearestLocation	1.69266	12.553	14.897	WBGene00002979	lfe-2
X0485	chrI	5035072	5035324	253	*	253	5041492	5042055	+	upstream	-6420	6168	NearestLocation	1.57955	2.45063	4.01438	WBGene00016729	C46H11.3
X0486	chrI	5035639	5035914	276	*	276	5041492	5042055	+	upstream	-5853	5578	NearestLocation	1.71954	8.70799	10.759	WBGene00016729	C46H11.3
X0487	chrI	5036654	5036933	280	*	280	5041492	5042055	+	upstream	-4838	4559	NearestLocation	1.75861	14.8779	17.3832	WBGene00016729	C46H11.3
X0488	chrI	5072168	5072438	271	*	271	5073579	5079303	+	upstream	-1411	1141	NearestLocation	1.90455	5.39169	7.20285	WBGene00219654	linc-156
X0489	chrI	5082136	5082599	464	*	464	5079910	5082279	-	overlapStart	143	143	NearestLocation	1.72712	5.55995	7.36253	WBGene00016258	vha-16
X0490	chrI	5084625	5085068	444	*	444	5084898	5085028	+	includeFeature	-273	40	NearestLocation	1.32041	3.14905	4.76351	WBGene00196879	C30F8.6
X0491	chrI	5104870	5105511	642	*	642	5103580	5104916	-	overlapStart	46	46	NearestLocation	1.60887	2.39969	3.95747	WBGene00000502	chp-1
X0492	chrI	5126226	5126472	247	*	247	5123926	5127199	-	inside	973	727	NearestLocation	1.9209	6.29017	8.17332	WBGene00003132	mat-1
X0493	chrI	5130338	5130806	469	*	469	5131288	5134105	+	upstream	-950	482	NearestLocation	1.53915	2.02435	3.53744	WBGene00022456	pfkb-1.1
X0494	chrI	5207898	5208144	247	*	247	5200258	5203429	-	upstream	-4469	4469	NearestLocation	1.66017	5.8823	7.72837	WBGene00016329	osr-1
X0495	chrI	5255920	5256366	447	*	447	5255447	5256923	-	inside	1003	473	NearestLocation	1.41607	3.88587	5.5699	WBGene00015094	B0261.6
X0496	chrI	5291798	5292074	277	*	277	5284057	5291604	-	upstream	-194	194	NearestLocation	1.64982	14.579	17.0687	WBGene00001333	erm-1
X0497	chrI	5298422	5298669	248	*	248	5298755	5300331	-	downstream	1909	86	NearestLocation	1.92733	11.6677	13.9335	WBGene00015313	hpo-32
X0498	chrI	5309042	5309348	307	*	307	5311869	5312003	-	downstream	2961	2521	NearestLocation	1.60046	13.159	15.5407	WBGene00196397	F48C1.12
X0499	chrI	5310175	5310476	302	*	302	5311869	5312003	-	downstream	1828	1393	NearestLocation	1.62519	9.80831	11.9392	WBGene00196397	F48C1.12
X0500	chrI	5354945	5355229	285	*	285	5354160	5357028	+	inside	785	785	NearestLocation	1.86294	5.50518	7.30913	WBGene00000966	dhs-2
X0501	chrI	5357106	5357379	274	*	274	5356232	5356728	-	upstream	-378	378	NearestLocation	1.57951	9.4461	11.5527	WBGene00219703	anr-38
X0502	chrI	5375901	5376155	255	*	255	5380160	5383029	+	upstream	-4259	4005	NearestLocation	1.62652	2.84889	4.44687	WBGene00016041	C24A11.2
X0503	chrI	5377363	5377733	371	*	371	5380160	5383029	+	upstream	-2797	2427	NearestLocation	1.57131	13.1452	15.5292	WBGene00016041	C24A11.2
X0504	chrI	5378566	5379663	1098	*	1098	5380160	5383029	+	upstream	-1594	497	NearestLocation	1.67704	3.77306	5.43965	WBGene00016041	C24A11.2
X0505	chrI	5380545	5380847	303	*	303	5380160	5383029	+	inside	385	385	NearestLocation	1.55203	1.99915	3.51418	WBGene00016041	C24A11.2
X0506	chrI	5381521	5381908	388	*	388	5380160	5383029	+	inside	1361	1121	NearestLocation	1.50656	1.61895	3.08697	WBGene00016041	C24A11.2
X0507	chrI	5387046	5387649	604	*	604	5388900	5388920	-	downstream	1874	1251	NearestLocation	1.78857	4.78764	6.55029	WBGene00173516	21ur-14736
X0508	chrI	5388295	5388583	289	*	289	5388900	5388920	-	downstream	625	317	NearestLocation	1.70591	13.9571	16.3933	WBGene00173516	21ur-14736
X0509	chrI	5389593	5390644	1052	*	1052	5388900	5388920	-	upstream	-673	673	NearestLocation	2.04281	7.81799	9.78729	WBGene00173516	21ur-14736
X0510	chrI	5429419	5429678	260	*	260	5428543	5429908	-	inside	489	230	NearestLocation	1.4673	7.21065	9.16281	WBGene00000230	atp-3
X0511	chrI	5455495	5455747	253	*	253	5453364	5453478	-	upstream	-2017	2017	NearestLocation	2.21409	13.2301	15.6191	WBGene00219918	F27C1.18
X0512	chrI	5485223	5485624	402	*	402	5486067	5486087	+	upstream	-844	443	NearestLocation	1.36989	5.64335	7.46649	WBGene00174770	21ur-12380
X0513	chrI	5547087	5547335	249	*	249	5547013	5547033	-	upstream	-54	54	NearestLocation	1.58226	10.2184	12.3818	WBGene00167738	21ur-13147
X0514	chrI	5571932	5572247	316	*	316	5571784	5572973	-	inside	1041	148	NearestLocation	1.7294	3.30834	4.94462	WBGene00000474	cey-3
X0515	chrI	5584429	5584705	277	*	277	5586356	5586492	-	downstream	2063	1651	NearestLocation	1.76747	7.92662	9.92621	WBGene00196903	M01E11.9
X0516	chrI	5620093	5620471	379	*	379	5620777	5623050	+	upstream	-684	306	NearestLocation	1.39058	2.99983	4.61264	WBGene00018510	F46F11.7
X0517	chrI	5626471	5626964	494	*	494	5624602	5626288	-	upstream	-183	183	NearestLocation	1.54579	1.92673	3.43144	WBGene00018511	F46F11.8
X0518	chrI	5653899	5654185	287	*	287	5649756	5653639	-	upstream	-260	260	NearestLocation	1.81041	10.4907	12.6695	WBGene00018891	F55F8.3
X0519	chrI	5658152	5658711	560	*	560	5657919	5658712	-	inside	560	1	NearestLocation	1.86254	7.51774	9.47249	WBGene00018894	mff-2
X0520	chrI	5681921	5682176	256	*	256	5678638	5679863	+	downstream	3283	2058	NearestLocation	1.67891	10.0274	12.178	WBGene00020557	T19B4.3
X0521	chrI	5696326	5696594	269	*	269	5691838	5697450	+	inside	4488	856	NearestLocation	1.74951	12.366	14.6826	WBGene00003793	npp-7
X0522	chrI	5809785	5810054	270	*	270	5808421	5810002	-	overlapStart	217	52	NearestLocation	1.82739	5.71444	7.55259	WBGene00016332	C32F10.4
X0523	chrI	6000674	6000975	302	*	302	5992670	6001099	-	inside	425	124	NearestLocation	1.88236	9.47794	11.586	WBGene00006823	unc-94
X0524	chrI	6060228	6060495	268	*	268	6058449	6061033	-	inside	805	538	NearestLocation	1.69335	3.74981	5.4265	WBGene00016158	ari-1
X0525	chrI	6075893	6076296	404	*	404	6070303	6078847	-	inside	2954	2551	NearestLocation	1.79327	4.18428	5.88876	WBGene00022750	ZK484.4
X0526	chrI	6085605	6085877	273	*	273	6087369	6087764	-	downstream	2159	1492	NearestLocation	1.93774	9.52018	11.6342	WBGene00022751	ZK484.5
X0527	chrI	6090494	6090880	387	*	387	6090075	6090895	-	inside	401	15	NearestLocation	1.52837	2.30728	3.85279	WBGene00022752	ZK484.6
X0528	chrI	6093356	6093690	335	*	335	6093305	6094419	+	inside	51	51	NearestLocation	1.57678	12.6288	14.9705	WBGene00022748	oaz-1
X0529	chrI	6117538	6118153	616	*	616	6122590	6126854	+	upstream	-5052	4437	NearestLocation	1.60199	2.45838	4.0155	WBGene00020838	trak-1
X0530	chrI	6118868	6119338	471	*	471	6122590	6126854	+	upstream	-3722	3252	NearestLocation	1.54033	1.68701	3.1649	WBGene00020838	trak-1
X0531	chrI	6120527	6120840	314	*	314	6122590	6126854	+	upstream	-2063	1750	NearestLocation	1.66974	2.72997	4.31789	WBGene00020838	trak-1
X0532	chrI	6121745	6122120	376	*	376	6122590	6126854	+	upstream	-845	470	NearestLocation	1.99698	6.24853	8.11589	WBGene00020838	trak-1
X0533	chrI	6164149	6164419	271	*	271	6164191	6164264	+	includeFeature	-42	42	NearestLocation	1.70378	7.52872	9.50186	WBGene00023135	T09B4.t1
X0534	chrI	6181383	6181734	352	*	352	6177983	6180840	-	upstream	-543	543	NearestLocation	1.689	2.94863	4.55203	WBGene00020383	tin-44
X0535	chrI	6195155	6195403	249	*	249	6192287	6194899	-	upstream	-256	256	NearestLocation	2.02864	13.7221	16.151	WBGene00020260	T05E7.4
X0536	chrI	6216365	6216654	290	*	290	6215669	6219911	+	inside	696	696	NearestLocation	1.60314	8.81574	10.8749	WBGene00020346	T08B2.5
X0537	chrI	6224155	6224528	374	*	374	6225096	6225964	+	upstream	-941	568	NearestLocation	1.33233	1.78059	3.26486	WBGene00020345	T08B2.4
X0538	chrI	6263136	6263386	251	*	251	6263980	6264092	-	downstream	956	594	NearestLocation	1.66815	9.37599	11.4781	WBGene00195455	C48E7.12
X0539	chrI	6311846	6312264	419	*	419	6312750	6314624	+	upstream	-904	486	NearestLocation	1.35456	1.8841	3.38612	WBGene00005171	srg-14
X0540	chrI	6374862	6375162	301	*	301	6374842	6374988	-	overlapStart	126	20	NearestLocation	2.06703	12.2732	14.5867	WBGene00201662	ZC308.6
X0541	chrI	6388983	6389252	270	*	270	6386148	6392524	-	inside	3541	2835	NearestLocation	1.64174	10.6727	12.8685	WBGene00022592	klu-2
X0542	chrI	6398124	6398378	255	*	255	6402649	6402806	+	upstream	-4525	4271	NearestLocation	1.51917	8.66883	10.7216	WBGene00196705	ZC328.6
X0543	chrI	6435695	6436254	560	*	560	6436098	6441191	+	overlapStart	-403	156	NearestLocation	1.42531	5.56412	7.38182	WBGene00004924	snt-4
X0544	chrI	6443362	6443625	264	*	264	6441633	6446464	-	inside	3102	1729	NearestLocation	1.9287	7.33227	9.29057	WBGene00020742	T23H2.3
X0545	chrI	6465498	6465790	293	*	293	6466850	6467515	+	upstream	-1352	1060	NearestLocation	1.9436	21.4976	24.5388	WBGene00019431	K06A5.3
X0546	chrI	6514192	6514459	268	*	268	6514021	6517507	+	inside	171	171	NearestLocation	1.56253	3.82919	5.50377	WBGene00001599	glh-2
X0547	chrI	6531784	6532038	255	*	255	6530130	6533031	-	inside	1247	993	NearestLocation	1.64521	2.73628	4.32777	WBGene00020417	nuo-2
X0548	chrI	6554548	6554805	258	*	258	6554504	6554709	-	overlapStart	161	44	NearestLocation	1.49893	7.37639	9.34042	WBGene00196721	F57B10.17
X0549	chrI	6568524	6568790	267	*	267	6569494	6572600	+	upstream	-970	704	NearestLocation	1.54139	1.83727	3.33675	WBGene00019001	ipgm-1
X0550	chrI	6570069	6570591	523	*	523	6569494	6572600	+	inside	575	575	NearestLocation	1.49516	1.47992	2.93331	WBGene00019001	ipgm-1
X0551	chrI	6572001	6572856	856	*	856	6574004	6585175	+	upstream	-2003	1148	NearestLocation	1.5753	2.5134	4.07113	WBGene00002783	let-607
X0552	chrI	6573378	6574066	689	*	689	6574004	6585175	+	overlapStart	-626	62	NearestLocation	1.72804	4.81581	6.57273	WBGene00002783	let-607
X0553	chrI	6580020	6580510	491	*	491	6581853	6582000	-	downstream	1980	1343	NearestLocation	1.5515	2.86073	4.45813	WBGene00197712	F48A9.4
X0554	chrI	6582095	6582384	290	*	290	6581853	6582000	-	upstream	-95	95	NearestLocation	1.53622	2.12726	3.65688	WBGene00197712	F48A9.4
X0555	chrI	6583494	6583949	456	*	456	6582791	6582913	+	downstream	703	581	NearestLocation	1.53994	2.95316	4.55621	WBGene00219955	F48A9.6
X0556	chrI	6836723	6837319	597	*	597	6836390	6838142	+	inside	333	333	NearestLocation	1.43489	3.91839	5.6105	WBGene00019322	ahcy-1
X0557	chrI	6878993	6879286	294	*	294	6882058	6882188	+	upstream	-3065	2772	NearestLocation	1.8008	6.07399	7.93022	WBGene00197432	T21G5.7
X0558	chrI	6921612	6921864	253	*	253	6917750	6922955	-	inside	1343	1091	NearestLocation	1.78344	8.53179	10.5763	WBGene00016744	bbs-9
X0559	chrI	6933548	6933824	277	*	277	6934996	6935252	+	upstream	-1448	1172	NearestLocation	2.17523	8.8279	10.8869	WBGene00197457	T10B11.10
X0560	chrI	6945598	6946107	510	*	510	6942701	6945360	-	upstream	-238	238	NearestLocation	1.5816	1.92393	3.43026	WBGene00020402	T10B11.6
X0561	chrI	6948725	6949095	371	*	371	6946064	6950458	-	inside	1733	1363	NearestLocation	1.46478	1.8089	3.30223	WBGene00020403	T10B11.7
X0562	chrI	6958857	6959112	256	*	256	6954411	6961139	-	inside	2282	2027	NearestLocation	1.67867	5.18157	6.97396	WBGene00016260	C30F12.1
X0563	chrI	7019264	7019894	631	*	631	7021407	7021584	+	upstream	-2143	1513	NearestLocation	2.32703	14.8605	17.3912	WBGene00200247	VF15C11L.1
X0564	chrI	7020516	7020883	368	*	368	7021407	7021584	+	upstream	-891	524	NearestLocation	1.6026	12.2872	14.6008	WBGene00200247	VF15C11L.1
X0565	chrI	7021327	7021579	253	*	253	7021407	7021584	+	overlapStart	-80	5	NearestLocation	1.75871	12.8668	15.2218	WBGene00200247	VF15C11L.1
X0566	chrI	7025213	7025491	279	*	279	7021982	7029076	+	inside	3231	3231	NearestLocation	1.80717	5.58043	7.40858	WBGene00008852	ubql-1
X0567	chrI	7040497	7040750	254	*	254	7040641	7040711	-	includeFeature	214	39	NearestLocation	1.55879	5.59491	7.41852	WBGene00196188	F15C11.4
X0568	chrI	7055845	7056162	318	*	318	7053773	7056875	-	inside	1030	713	NearestLocation	1.83406	5.04513	6.83043	WBGene00012164	W01A8.2
X0569	chrI	7057502	7057840	339	*	339	7057170	7059349	+	inside	332	332	NearestLocation	1.99978	12.843	15.1998	WBGene00007024	plin-1
X0570	chrI	7081283	7081598	316	*	316	7079911	7082020	-	inside	737	422	NearestLocation	1.79663	16.392	19.0182	WBGene00009050	F22D6.2
X0571	chrI	7082881	7083219	339	*	339	7079911	7082020	-	upstream	-861	861	NearestLocation	1.43992	9.16035	11.2374	WBGene00009050	F22D6.2
X0572	chrI	7083492	7083792	301	*	301	7079911	7082020	-	upstream	-1472	1472	NearestLocation	1.85772	13.3198	15.71	WBGene00009050	F22D6.2
X0573	chrI	7084409	7084819	411	*	411	7079911	7082020	-	upstream	-2389	2389	NearestLocation	1.41083	8.69402	10.7413	WBGene00009050	F22D6.2
X0574	chrI	7087606	7088030	425	*	425	7088022	7090062	-	overlapEnd	2456	8	NearestLocation	1.53635	13.1357	15.523	WBGene00003815	nars-1
X0575	chrI	7139507	7140000	494	*	494	7134743	7139973	-	overlapStart	466	27	NearestLocation	1.3303	3.87851	5.56777	WBGene00010738	K10D3.4
X0576	chrI	7148801	7149070	270	*	270	7140278	7147230	-	upstream	-1571	1571	NearestLocation	1.47061	9.80812	11.9387	WBGene00010427	hpo-11
X0577	chrI	7149494	7149742	249	*	249	7149937	7151871	-	downstream	2377	195	NearestLocation	1.46991	5.7675	7.60877	WBGene00010645	fecl-1
X0578	chrI	7158028	7158289	262	*	262	7152460	7156786	-	upstream	-1242	1242	NearestLocation	1.62198	3.14759	4.77353	WBGene00010641	crml-1
X0579	chrI	7245043	7245290	248	*	248	7244937	7246295	+	inside	106	106	NearestLocation	1.64851	3.29288	4.93267	WBGene00011063	cpg-3
X0580	chrI	7287777	7288033	257	*	257	7286301	7286321	-	upstream	-1456	1456	NearestLocation	1.43205	6.60389	8.50447	WBGene00171935	21ur-14201
X0581	chrI	7317591	7317926	336	*	336	7317646	7318659	+	overlapStart	-55	55	NearestLocation	1.77667	3.6822	5.35096	WBGene00009915	F52A8.1
X0582	chrI	7345058	7345392	335	*	335	7347222	7350386	+	upstream	-2164	1830	NearestLocation	1.9299	8.44679	10.4796	WBGene00009919	F52A8.6
X0583	chrI	7421296	7421546	251	*	251	7422785	7454088	+	upstream	-1489	1239	NearestLocation	1.79445	6.58554	8.48337	WBGene00006752	unc-13
X0584	chrI	7422565	7422851	287	*	287	7422785	7454088	+	overlapStart	-220	66	NearestLocation	1.86946	7.60657	9.58307	WBGene00006752	unc-13
X0585	chrI	7491998	7492252	255	*	255	7492046	7492938	+	overlapStart	-48	48	NearestLocation	1.52505	7.18663	9.13225	WBGene00012140	T28F4.5
X0586	chrI	7520996	7521251	256	*	256	7522116	7526703	+	upstream	-1120	865	NearestLocation	1.45644	7.7869	9.7721	WBGene00001648	goa-1
X0587	chrI	7537732	7537980	249	*	249	7536204	7542157	-	inside	4425	1528	NearestLocation	1.44473	6.77318	8.68574	WBGene00000938	dcp-66
X0588	chrI	7543332	7543615	284	*	284	7544618	7544730	-	downstream	1398	1003	NearestLocation	1.41482	5.56136	7.38786	WBGene00197716	H15M21.1
X0589	chrI	7544489	7544788	300	*	300	7544618	7544730	-	includeFeature	241	58	NearestLocation	1.47831	9.13376	11.2163	WBGene00197716	H15M21.1
X0590	chrI	7564443	7564799	357	*	357	7564584	7567718	+	overlapStart	-141	141	NearestLocation	1.84265	15.5954	18.1571	WBGene00012031	T25G3.4
X0591	chrI	7573999	7574294	296	*	296	7574195	7578564	+	overlapStart	-196	99	NearestLocation	1.59009	11.6176	13.8829	WBGene00008412	D2030.2
X0592	chrI	7596281	7596640	360	*	360	7596507	7602203	+	overlapStart	-226	133	NearestLocation	1.38525	1.77973	3.26771	WBGene00008419	wdr-23
X0593	chrI	7596851	7597141	291	*	291	7596507	7602203	+	inside	344	344	NearestLocation	1.72971	15.8168	18.4036	WBGene00008419	wdr-23
X0594	chrI	7597834	7598404	571	*	571	7596507	7602203	+	inside	1327	1327	NearestLocation	1.85621	5.94634	7.77615	WBGene00008419	wdr-23
X0595	chrI	7659256	7659959	704	*	704	7656907	7658291	-	upstream	-965	965	NearestLocation	1.67211	3.06972	4.68864	WBGene00009142	F26A3.4
X0596	chrI	7661697	7662779	1083	*	1083	7656907	7658291	-	upstream	-3406	3406	NearestLocation	1.85601	5.00521	6.78435	WBGene00009142	F26A3.4
X0597	chrI	7666619	7666881	263	*	263	7667729	7669797	+	upstream	-1110	848	NearestLocation	2.09329	7.02041	8.95678	WBGene00009143	F26A3.5
X0598	chrI	7754135	7754439	305	*	305	7755778	7756353	+	upstream	-1643	1339	NearestLocation	2.11309	12.778	15.1281	WBGene00010291	F58H10.1
X0599	chrI	7831528	7831788	261	*	261	7826441	7831629	-	overlapStart	101	101	NearestLocation	1.56549	5.68022	7.51738	WBGene00009271	glna-3
X0600	chrI	7859667	7859977	311	*	311	7859940	7860105	-	overlapEnd	438	37	NearestLocation	1.58667	13.1458	15.5256	WBGene00220041	R11A5.8
X0601	chrI	7860587	7860927	341	*	341	7859940	7860105	-	upstream	-482	482	NearestLocation	1.43479	1.62134	3.0922	WBGene00220041	R11A5.8
X0602	chrI	7862300	7862603	304	*	304	7862842	7863553	-	downstream	1253	239	NearestLocation	1.38847	1.31761	2.75217	WBGene00011231	R11A5.3
X0603	chrI	7866138	7866507	370	*	370	7866132	7872080	+	inside	6	6	NearestLocation	1.6784	6.67743	8.57184	WBGene00011232	pck-2
X0604	chrI	7867662	7867933	272	*	272	7867577	7867918	-	overlapStart	256	15	NearestLocation	1.59457	13.2984	15.6894	WBGene00011234	R11A5.6
X0605	chrI	7868288	7868539	252	*	252	7867577	7867918	-	upstream	-370	370	NearestLocation	1.42018	4.75991	6.51364	WBGene00011234	R11A5.6
X0606	chrI	7913982	7914305	324	*	324	7906813	7914116	-	overlapStart	134	134	NearestLocation	1.81172	15.5882	18.1581	WBGene00010113	F55D12.5
X0607	chrI	7926806	7927063	258	*	258	7918442	7926337	-	upstream	-469	469	NearestLocation	1.51274	1.40967	2.85725	WBGene00008990	smgl-1
X0608	chrI	7941686	7941966	281	*	281	7942719	7945588	+	upstream	-1033	753	NearestLocation	1.79451	10.3386	12.509	WBGene00011917	T22C1.6
X0609	chrI	7969298	7969558	261	*	261	7968753	7968828	-	upstream	-470	470	NearestLocation	1.43608	6.60583	8.49573	WBGene00220081	T22C1.17
X0610	chrI	8010690	8010999	310	*	310	8010207	8010366	-	upstream	-324	324	NearestLocation	1.84672	16.418	19.0463	WBGene00219863	C54G4.16
X0611	chrI	8018272	8018676	405	*	405	8019501	8022715	+	upstream	-1229	825	NearestLocation	1.63933	2.4105	3.9659	WBGene00008317	C54G4.7
X0612	chrI	8024131	8024411	281	*	281	8022685	8024422	-	inside	291	11	NearestLocation	1.54727	8.04781	10.0482	WBGene00000869	cyc-1
X0613	chrI	8028704	8029051	348	*	348	8026606	8028752	-	overlapStart	48	48	NearestLocation	1.55846	11.5874	13.8493	WBGene00010560	iftb-1
X0614	chrI	8030013	8030279	267	*	267	8030959	8032877	+	upstream	-946	680	NearestLocation	1.74776	3.58557	5.2513	WBGene00045192	aho-3
X0615	chrI	8030866	8031112	247	*	247	8030959	8032877	+	overlapStart	-93	93	NearestLocation	1.80818	6.03124	7.89422	WBGene00045192	aho-3
X0616	chrI	8107311	8107561	251	*	251	8103601	8109227	+	inside	3710	1666	NearestLocation	1.66579	3.02852	4.64733	WBGene00005009	spr-4
X0617	chrI	8119107	8119370	264	*	264	8109743	8119314	-	overlapStart	207	56	NearestLocation	1.50529	10.1026	12.2556	WBGene00002999	lin-10
X0618	chrI	8134157	8134774	618	*	618	8133891	8135060	+	inside	266	266	NearestLocation	1.47372	3.30987	4.94325	WBGene00012113	T28B8.1
X0619	chrI	8216747	8217012	266	*	266	8212362	8218361	-	inside	1614	1349	NearestLocation	1.68308	11.0156	13.2361	WBGene00000967	dhs-3
X0620	chrI	8217353	8217671	319	*	319	8212362	8218361	-	inside	1008	690	NearestLocation	2.11413	18.8278	21.6515	WBGene00000967	dhs-3
X0621	chrI	8294854	8295390	537	*	537	8294881	8296983	+	overlapStart	-27	27	NearestLocation	1.74906	4.27728	5.99445	WBGene00003183	mei-1
X0622	chrI	8305442	8305733	292	*	292	8305488	8305702	+	includeFeature	-46	31	NearestLocation	1.4707	9.47937	11.5824	WBGene00198101	F52B5.9
X0623	chrI	8306175	8306477	303	*	303	8305488	8305702	+	downstream	687	473	NearestLocation	2.00628	11.5544	13.8126	WBGene00198101	F52B5.9
X0624	chrI	8308854	8309124	271	*	271	8307643	8307733	-	upstream	-1121	1121	NearestLocation	1.69574	7.14164	9.08494	WBGene00199946	F52B5.10
X0625	chrI	8309373	8309768	396	*	396	8307643	8307733	-	upstream	-1640	1640	NearestLocation	1.4098	2.57756	4.14923	WBGene00199946	F52B5.10
X0626	chrI	8329262	8329635	374	*	374	8329061	8329684	-	inside	422	49	NearestLocation	1.68068	4.0113	5.70838	WBGene00004439	rpl-25.2
X0627	chrI	8384288	8384785	498	*	498	8384300	8384442	-	includeFeature	154	12	NearestLocation	1.49285	2.29662	3.83724	WBGene00197888	F16D3.8
X0628	chrI	8391949	8392842	894	*	894	8377602	8392753	-	overlapStart	804	89	NearestLocation	1.65374	2.86953	4.4672	WBGene00011827	T19A6.1
X0629	chrI	8393346	8394266	921	*	921	8394728	8398628	+	upstream	-1382	462	NearestLocation	1.62813	2.75745	4.34155	WBGene00003596	ngp-1
X0630	chrI	8427379	8427742	364	*	364	8424999	8426084	-	upstream	-1295	1295	NearestLocation	1.49995	2.06082	3.58073	WBGene00008530	F02E9.5
X0631	chrI	8438908	8439154	247	*	247	8435962	8438638	-	upstream	-270	270	NearestLocation	1.76958	4.25357	5.97788	WBGene00008648	F10D11.2
X0632	chrI	8529666	8529941	276	*	276	8530118	8530204	+	upstream	-452	177	NearestLocation	1.59156	2.83884	4.43762	WBGene00197950	K02B12.11
X0633	chrI	8559375	8559683	309	*	309	8568138	8568207	+	upstream	-8763	8455	NearestLocation	2.1103	14.4375	16.911	WBGene00199872	T01H8.7
X0634	chrI	8614191	8614741	551	*	551	8612728	8615131	-	inside	940	390	NearestLocation	1.72853	3.73002	5.40268	WBGene00009666	F43G9.3
X0635	chrI	8615772	8616071	300	*	300	8615386	8616421	+	inside	386	350	NearestLocation	1.73043	3.2354	4.87036	WBGene00009668	cfim-1
X0636	chrI	8674203	8674518	316	*	316	8669978	8673548	-	upstream	-655	655	NearestLocation	1.713	15.6718	18.2496	WBGene00086557	K07A12.8
X0637	chrI	8681071	8681332	262	*	262	8676663	8681334	-	inside	263	2	NearestLocation	1.63885	6.08455	7.95118	WBGene00010621	egg-6
X0638	chrI	8692943	8693199	257	*	257	8692946	8693469	+	overlapStart	-3	3	NearestLocation	1.53498	9.52974	11.6372	WBGene00000209	asg-1
X0639	chrI	8700219	8700708	490	*	490	8697923	8701971	-	inside	1752	1263	NearestLocation	1.71326	3.37081	5.00614	WBGene00006577	tlf-1
X0640	chrI	8749108	8749413	306	*	306	8749616	8751369	-	downstream	2261	203	NearestLocation	1.79197	14.8654	17.3707	WBGene00007977	gska-3
X0641	chrI	8760972	8761303	332	*	332	8759193	8759790	-	upstream	-1182	1182	NearestLocation	1.91121	15.3097	17.8552	WBGene00006574	tin-13
X0642	chrI	8761935	8762242	308	*	308	8762988	8765633	+	upstream	-1053	746	NearestLocation	1.73807	9.42635	11.5289	WBGene00003052	lmn-1
X0643	chrI	8762671	8762958	288	*	288	8762988	8765633	+	upstream	-317	30	NearestLocation	1.75636	5.39159	7.19762	WBGene00003052	lmn-1
X0644	chrI	8764461	8765020	560	*	560	8762988	8765633	+	inside	1473	613	NearestLocation	1.56624	4.13294	5.84299	WBGene00003052	lmn-1
X0645	chrI	8781074	8781325	252	*	252	8781154	8781238	-	includeFeature	164	80	NearestLocation	1.93559	9.42448	11.5322	WBGene00014301	DY3.t2
X0646	chrI	8789329	8789744	416	*	416	8790296	8790456	+	upstream	-967	552	NearestLocation	1.34648	3.60198	5.26438	WBGene00200441	DY3.10
X0647	chrI	8796378	8796630	253	*	253	8798785	8801661	+	upstream	-2407	2155	NearestLocation	1.39021	4.94352	6.72246	WBGene00009453	F36A2.3
X0648	chrI	8815817	8816085	269	*	269	8815512	8816488	-	inside	671	305	NearestLocation	1.65404	10.4885	12.6721	WBGene00004484	rps-15
X0649	chrI	8838080	8838550	471	*	471	8828044	8838719	-	inside	639	169	NearestLocation	1.92458	6.02625	7.87844	WBGene00009460	ubr-5
X0650	chrI	8863192	8863464	273	*	273	8853688	8861274	-	upstream	-1918	1918	NearestLocation	2.1858	11.5128	13.7725	WBGene00010137	ztf-26
X0651	chrI	8969637	8969893	257	*	257	8966975	8970128	-	inside	491	235	NearestLocation	1.54792	8.13445	10.1478	WBGene00004953	spd-2
X0652	chrI	9011784	9012415	632	*	632	9009054	9013885	-	inside	2101	1470	NearestLocation	1.64084	7.07117	9.00529	WBGene00009477	rbpl-1
X0653	chrI	9051091	9051371	281	*	281	9051243	9051328	+	includeFeature	-152	43	NearestLocation	1.97333	9.52625	11.6371	WBGene00200427	W06D4.9
X0654	chrI	9053900	9054203	304	*	304	9055149	9055262	-	downstream	1362	946	NearestLocation	1.9253	15.3161	17.8711	WBGene00004838	sls-2.6
X0655	chrI	9064233	9064489	257	*	257	9063715	9064398	-	overlapStart	165	91	NearestLocation	1.605	11.5971	13.8607	WBGene00006503	snx-3
X0656	chrI	9074824	9075105	282	*	282	9070399	9075077	-	overlapStart	253	28	NearestLocation	1.59029	12.7938	15.1471	WBGene00011531	rsbp-1
X0657	chrI	9080623	9081014	392	*	392	9077566	9080024	-	upstream	-599	599	NearestLocation	1.56138	5.26157	7.05187	WBGene00011532	chaf-1
X0658	chrI	9085112	9085369	258	*	258	9085351	9085855	-	overlapEnd	743	18	NearestLocation	2.17218	22.3281	25.4391	WBGene00077558	T06D10.3
X0659	chrI	9085859	9086528	670	*	670	9085351	9085855	-	upstream	-4	4	NearestLocation	1.56996	12.6542	14.9971	WBGene00077558	T06D10.3
X0660	chrI	9087152	9087448	297	*	297	9087743	9087883	-	downstream	731	295	NearestLocation	1.62728	11.5238	13.7809	WBGene00197971	T06D10.6
X0661	chrI	9092862	9093191	330	*	330	9095957	9100186	+	upstream	-3095	2766	NearestLocation	1.51219	1.4043	2.85158	WBGene00003182	mef-2
X0662	chrI	9093990	9094419	430	*	430	9095957	9100186	+	upstream	-1967	1538	NearestLocation	2.31341	20.4152	23.3743	WBGene00003182	mef-2
X0663	chrI	9098731	9099023	293	*	293	9099016	9099154	-	overlapEnd	423	7	NearestLocation	1.56622	11.827	14.1056	WBGene00196398	W10D5.4
X0664	chrI	9105670	9105934	265	*	265	9106600	9106697	-	downstream	1027	666	NearestLocation	1.51015	8.49048	10.5307	WBGene00220127	W10D5.5
X0665	chrI	9110414	9111140	727	*	727	9108173	9110918	-	overlapStart	504	222	NearestLocation	1.59204	12.7602	15.1114	WBGene00012376	nduf-7
X0666	chrI	9111619	9111995	377	*	377	9108173	9110918	-	upstream	-701	701	NearestLocation	1.95476	10.076	12.2212	WBGene00012376	nduf-7
X0667	chrI	9112809	9113270	462	*	462	9108173	9110918	-	upstream	-1891	1891	NearestLocation	1.53914	3.8828	5.56365	WBGene00012376	nduf-7
X0668	chrI	9139080	9139343	264	*	264	9139172	9139321	+	includeFeature	-92	22	NearestLocation	1.45349	7.01457	8.94017	WBGene00201319	ZK858.9
X0669	chrI	9164339	9164753	415	*	415	9163531	9166952	+	inside	808	808	NearestLocation	1.46997	1.82999	3.32726	WBGene00001167	eef-2
X0670	chrI	9165850	9166753	904	*	904	9168432	9177497	+	upstream	-2582	1679	NearestLocation	1.57087	10.882	13.0939	WBGene00009126	pyk-1
X0671	chrI	9167313	9167592	280	*	280	9168432	9177497	+	upstream	-1119	840	NearestLocation	1.69	4.69841	6.4537	WBGene00009126	pyk-1
X0672	chrI	9171355	9171707	353	*	353	9168432	9177497	+	inside	2923	2923	NearestLocation	2.04044	20.6578	23.6312	WBGene00009126	pyk-1
X0673	chrI	9172043	9172969	927	*	927	9176327	9176453	+	upstream	-4284	3358	NearestLocation	1.78902	9.64137	11.7616	WBGene00045376	F25H5.9
X0674	chrI	9173887	9174287	401	*	401	9176327	9176453	+	upstream	-2440	2040	NearestLocation	1.88304	17.9514	20.7097	WBGene00045376	F25H5.9
X0675	chrI	9176632	9176909	278	*	278	9176327	9176453	+	downstream	305	179	NearestLocation	1.62694	3.39954	5.04769	WBGene00045376	F25H5.9
X0676	chrI	9182877	9183159	283	*	283	9179973	9181003	-	upstream	-1874	1874	NearestLocation	1.58434	10.5945	12.7829	WBGene00009125	F25H5.2
X0677	chrI	9188707	9188977	271	*	271	9179973	9181003	-	upstream	-7704	7704	NearestLocation	1.80975	3.89656	5.58848	WBGene00009125	F25H5.2
X0678	chrI	9194342	9194605	264	*	264	9205264	9205356	+	upstream	-10922	10659	NearestLocation	1.86034	8.3511	10.3812	WBGene00202238	C45G3.6
X0679	chrI	9199245	9199595	351	*	351	9205264	9205356	+	upstream	-6019	5669	NearestLocation	1.4012	1.52752	2.98801	WBGene00202238	C45G3.6
X0680	chrI	9243545	9243810	266	*	266	9234171	9245924	-	inside	2379	2114	NearestLocation	1.80029	7.17586	9.12149	WBGene00009498	tat-5
X0681	chrI	9249274	9249528	255	*	255	9246025	9249383	-	overlapStart	109	109	NearestLocation	1.48607	8.77205	10.8293	WBGene00009499	ent-6
X0682	chrI	9275671	9276224	554	*	554	9271443	9278689	-	inside	3018	2465	NearestLocation	1.74933	5.53387	7.34494	WBGene00008780	hxk-1
X0683	chrI	9280055	9280965	911	*	911	9271443	9278689	-	upstream	-1366	1366	NearestLocation	1.98246	7.01564	8.93682	WBGene00008780	hxk-1
X0684	chrI	9295166	9295899	734	*	734	9289744	9294007	-	upstream	-1159	1159	NearestLocation	1.60585	2.1312	3.66028	WBGene00009174	F26H9.2
X0685	chrI	9308360	9308618	259	*	259	9308442	9310221	+	overlapStart	-82	82	NearestLocation	1.6224	7.53971	9.5169	WBGene00004268	rab-5
X0686	chrI	9314721	9315123	403	*	403	9312644	9314488	-	upstream	-233	233	NearestLocation	1.70802	3.72494	5.3942	WBGene00009177	F26H9.5
X0687	chrI	9322923	9323204	282	*	282	9320361	9322511	-	upstream	-412	412	NearestLocation	1.85798	5.02864	6.80376	WBGene00002026	hsp-70
X0688	chrI	9331665	9331947	283	*	283	9332534	9332649	-	downstream	984	587	NearestLocation	1.85767	11.7934	14.069	WBGene00219811	C12C8.8
X0689	chrI	9332646	9332921	276	*	276	9332534	9332649	-	overlapStart	3	3	NearestLocation	1.59037	4.11486	5.82625	WBGene00219811	C12C8.8
X0690	chrI	9340928	9341569	642	*	642	9334850	9342496	-	inside	1568	927	NearestLocation	1.45321	2.75887	4.3493	WBGene00003026	lin-41
X0691	chrI	9343728	9344011	284	*	284	9334850	9342496	-	upstream	-1232	1232	NearestLocation	1.41258	6.27194	8.14323	WBGene00003026	lin-41
X0692	chrI	9369025	9369271	247	*	247	9366545	9366627	+	downstream	2480	2398	NearestLocation	1.58548	5.07337	6.86272	WBGene00198335	M04C9.9
X0693	chrI	9380134	9380561	428	*	428	9380354	9380499	+	includeFeature	-220	62	NearestLocation	1.7747	15.9552	18.5477	WBGene00200365	F16A11.8
X0694	chrI	9380966	9381215	250	*	250	9381717	9381833	+	upstream	-751	502	NearestLocation	1.33528	5.5464	7.36648	WBGene00219895	F16A11.13
X0695	chrI	9382957	9383415	459	*	459	9382980	9383170	+	includeFeature	-23	23	NearestLocation	1.57207	6.18355	8.05865	WBGene00199346	F16A11.7
X0695	chrI	9382957	9383415	459	*	459	9382980	9383170	-	includeFeature	213	23	NearestLocation	1.57207	6.18355	8.05865	WBGene00201192	F16A11.9
X0696	chrI	9383700	9384122	423	*	423	9382980	9383170	-	upstream	-530	530	NearestLocation	1.75816	11.5198	13.7757	WBGene00201192	F16A11.9
X0697	chrI	9399666	9399982	317	*	317	9393944	9404024	-	inside	4358	4042	NearestLocation	1.60587	2.14655	3.67527	WBGene00008876	F16A11.1
X0698	chrI	9402823	9403239	417	*	417	9393944	9404024	-	inside	1201	785	NearestLocation	1.64551	5.68069	7.50757	WBGene00008876	F16A11.1
X0699	chrI	9424423	9424932	510	*	510	9425033	9425233	-	downstream	810	101	NearestLocation	1.3852	6.29449	8.15676	WBGene00196780	C17E4.15
X0700	chrI	9495692	9495963	272	*	272	9492630	9494589	-	upstream	-1103	1103	NearestLocation	1.83325	4.29788	6.0237	WBGene00009262	F30A10.3
X0701	chrI	9497768	9498015	248	*	248	9500624	9500823	-	downstream	3055	2609	NearestLocation	1.63173	4.26626	5.98251	WBGene00219926	F30A10.16
X0702	chrI	9500878	9501445	568	*	568	9501268	9505164	+	overlapStart	-390	177	NearestLocation	1.63205	4.36682	6.09153	WBGene00006062	stn-1
X0703	chrI	9515492	9515982	491	*	491	9515001	9516776	-	inside	1284	491	NearestLocation	1.64895	4.20273	5.92109	WBGene00077771	C41G7.9
X0704	chrI	9625542	9626176	635	*	635	9625056	9626006	-	overlapStart	464	170	NearestLocation	1.40111	4.41906	6.14882	WBGene00004488	rps-19
X0705	chrI	9669543	9669793	251	*	251	9669415	9670141	+	inside	128	128	NearestLocation	1.55555	5.56935	7.39533	WBGene00004437	rpl-24.2
X0706	chrI	9688771	9689277	507	*	507	9689185	9690127	+	overlapStart	-414	92	NearestLocation	1.49282	7.74627	9.71442	WBGene00004426	rpl-14
X0707	chrI	9689614	9689880	267	*	267	9689185	9690127	+	inside	429	247	NearestLocation	1.85183	6.95197	8.88091	WBGene00004426	rpl-14
X0708	chrI	9724785	9725179	395	*	395	9727204	9728021	+	upstream	-2419	2025	NearestLocation	1.53605	2.98341	4.5881	WBGene00000430	ceh-5
X0709	chrI	9729831	9730213	383	*	383	9731348	9731484	-	downstream	1653	1135	NearestLocation	1.57351	7.34405	9.29928	WBGene00202237	C16C2.10
X0710	chrI	9731365	9731614	250	*	250	9731485	9731631	+	overlapStart	-120	17	NearestLocation	1.4987	2.35885	3.91056	WBGene00201181	C16C2.9
X0710	chrI	9731365	9731614	250	*	250	9731348	9731484	-	overlapStart	119	17	NearestLocation	1.4987	2.35885	3.91056	WBGene00202237	C16C2.10
X0711	chrI	9734067	9734338	272	*	272	9734086	9734297	-	includeFeature	230	19	NearestLocation	1.4485	1.51395	2.97362	WBGene00196406	C16C2.6
X0712	chrI	9741300	9741566	267	*	267	9739503	9739651	-	upstream	-1649	1649	NearestLocation	1.72693	9.32317	11.4238	WBGene00200742	K02A11.10
X0713	chrI	9744321	9744596	276	*	276	9744242	9745990	+	inside	79	79	NearestLocation	1.68356	12.009	14.3007	WBGene00010487	K02A11.2
X0714	chrI	9752447	9752812	366	*	366	9752601	9752742	+	includeFeature	-154	70	NearestLocation	1.5679	11.564	13.8191	WBGene00198315	K02A11.9
X0715	chrI	9772424	9772846	423	*	423	9771063	9772565	-	overlapStart	141	141	NearestLocation	1.43945	7.22238	9.16757	WBGene00009159	F26E4.4
X0716	chrI	9773098	9773361	264	*	264	9773170	9774012	+	overlapStart	-72	72	NearestLocation	1.66093	13.7101	16.1302	WBGene00009161	F26E4.6
X0717	chrI	9787884	9788154	271	*	271	9785778	9787624	-	upstream	-260	260	NearestLocation	1.55769	10.348	12.519	WBGene00006528	tba-1
X0718	chrI	9788659	9789961	1303	*	1303	9788749	9789965	+	overlapStart	-90	4	NearestLocation	2.66201	49.7188	53.806	WBGene00000371	cco-1
X0719	chrI	9851154	9851808	655	*	655	9850020	9851791	-	overlapStart	637	17	NearestLocation	1.75965	14.7775	17.2845	WBGene00010730	ensa-1
X0720	chrI	9852571	9852878	308	*	308	9852612	9852799	-	includeFeature	228	41	NearestLocation	1.6221	15.4718	18.0306	WBGene00196100	K10C3.8
X0721	chrI	9855377	9855697	321	*	321	9854233	9854382	+	downstream	1144	995	NearestLocation	1.22545	2.73538	4.32299	WBGene00198838	K10C3.10
X0722	chrI	9881792	9882067	276	*	276	9879189	9881504	-	upstream	-288	288	NearestLocation	1.63377	2.6037	4.17545	WBGene00003659	nhr-69
X0723	chrI	9883104	9883420	317	*	317	9883696	9883767	+	upstream	-592	276	NearestLocation	1.82365	9.40874	11.5099	WBGene00014533	T23H4.t1
X0724	chrI	10032333	10033157	825	*	825	10033045	10033190	-	overlapEnd	857	33	NearestLocation	1.56335	2.41419	3.96855	WBGene00196146	F10G8.10
X0725	chrI	10034981	10035232	252	*	252	10033543	10034816	-	upstream	-165	165	NearestLocation	1.52216	8.45988	10.4978	WBGene00003564	ncs-2
X0726	chrI	10036268	10036654	387	*	387	10037643	10037840	-	downstream	1572	989	NearestLocation	2.21009	19.4119	22.2901	WBGene00198497	F10G8.12
X0727	chrI	10037466	10037816	351	*	351	10037643	10037840	-	overlapEnd	374	24	NearestLocation	1.6703	12.1659	14.4712	WBGene00198497	F10G8.12
X0728	chrI	10040328	10040715	388	*	388	10040005	10040223	-	upstream	-105	105	NearestLocation	1.88306	13.9008	16.3382	WBGene00196679	F10G8.11
X0729	chrI	10046385	10046659	275	*	275	10046440	10048028	+	overlapStart	-55	55	NearestLocation	1.75228	11.6953	13.9629	WBGene00008664	nubp-1
X0730	chrI	10094217	10094501	285	*	285	10095271	10095537	+	upstream	-1054	770	NearestLocation	1.79084	10.3711	12.5428	WBGene00196204	B0379.9
X0731	chrI	10095107	10095653	547	*	547	10095271	10095537	+	includeFeature	-164	116	NearestLocation	1.58272	5.63005	7.4497	WBGene00196204	B0379.9
X0732	chrI	10097412	10097685	274	*	274	10097317	10097777	+	inside	95	92	NearestLocation	1.70767	10.8159	13.0196	WBGene00007158	B0379.6
X0733	chrI	10103451	10103736	286	*	286	10103538	10103626	+	includeFeature	-87	87	NearestLocation	1.76955	3.72371	5.40682	WBGene00219788	B0379.13
X0734	chrI	10155128	10155382	255	*	255	10155284	10158497	+	overlapStart	-156	98	NearestLocation	1.36851	5.72747	7.56008	WBGene00023415	F16C3.3
X0735	chrI	10169864	10170302	439	*	439	10169441	10169580	+	downstream	423	284	NearestLocation	1.44124	3.74042	5.4066	WBGene00199495	C25A1.18
X0736	chrI	10175191	10175557	367	*	367	10175319	10175461	-	includeFeature	270	96	NearestLocation	1.51307	10.1586	12.3151	WBGene00077527	C25A1.17
X0737	chrI	10176808	10177127	320	*	320	10177181	10178921	+	upstream	-373	54	NearestLocation	1.70128	10.6458	12.8344	WBGene00007707	C25A1.5
X0738	chrI	10189651	10190060	410	*	410	10187515	10190896	-	inside	1245	836	NearestLocation	1.74703	5.59098	7.41536	WBGene00000931	dao-5
X0739	chrI	10230998	10231320	323	*	323	10227757	10231214	-	overlapStart	216	106	NearestLocation	1.59491	12.1315	14.4339	WBGene00013709	csnk-1
X0740	chrI	10237425	10237763	339	*	339	10237462	10237682	-	includeFeature	257	37	NearestLocation	1.67078	2.95216	4.5558	WBGene00201517	ZC247.7
X0741	chrI	10298460	10298722	263	*	263	10298215	10300587	+	inside	245	245	NearestLocation	1.68213	12.4113	14.7336	WBGene00011864	T20F10.2
X0742	chrI	10340221	10340628	408	*	408	10340997	10345651	+	upstream	-776	369	NearestLocation	1.24586	1.90386	3.40664	WBGene00000148	aph-2
X0743	chrI	10399130	10399505	376	*	376	10398908	10399056	+	downstream	222	74	NearestLocation	1.51819	1.76632	3.25592	WBGene00201383	F25D7.10
X0744	chrI	10400851	10401176	326	*	326	10401067	10402774	+	overlapStart	-216	109	NearestLocation	1.58889	2.78967	4.38053	WBGene00009112	tag-353
X0745	chrI	10401756	10402129	374	*	374	10401067	10402774	+	inside	689	645	NearestLocation	1.6535	10.2005	12.3557	WBGene00009112	tag-353
X0746	chrI	10409284	10409582	299	*	299	10409359	10414707	+	overlapStart	-75	75	NearestLocation	1.64706	13.8436	16.2771	WBGene00003847	blmp-1
X0747	chrI	10435005	10435324	320	*	320	10432815	10435876	-	inside	871	552	NearestLocation	1.29813	4.80241	6.54799	WBGene00003902	pab-1
X0748	chrI	10436237	10436897	661	*	661	10436254	10436884	+	includeFeature	-17	13	NearestLocation	1.62597	5.66023	7.47618	WBGene00004444	rpl-30
X0749	chrI	10446446	10446817	372	*	372	10446677	10452071	+	overlapStart	-231	140	NearestLocation	1.45388	4.20544	5.90174	WBGene00004753	sec-8
X0750	chrI	10525622	10525905	284	*	284	10526602	10530094	+	upstream	-980	697	NearestLocation	2.0754	6.88467	8.80219	WBGene00044792	F59C6.14
X0751	chrI	10541800	10542046	247	*	247	10543024	10546425	+	upstream	-1224	978	NearestLocation	1.47736	1.28946	2.71985	WBGene00009116	snx-27
X0752	chrI	10543434	10543701	268	*	268	10543024	10546425	+	inside	410	410	NearestLocation	1.90394	4.83102	6.59926	WBGene00009116	snx-27
X0753	chrI	10553177	10553521	345	*	345	10553112	10553913	-	inside	736	65	NearestLocation	1.35135	5.71871	7.53551	WBGene00009119	ndk-1
X0754	chrI	10561057	10561337	281	*	281	10562970	10564914	+	upstream	-1913	1633	NearestLocation	1.5967	13.9047	16.3424	WBGene00006720	ubc-25
X0755	chrI	10565899	10566152	254	*	254	10566350	10567394	+	upstream	-451	198	NearestLocation	1.52244	9.00996	11.0867	WBGene00003926	pas-5
X0756	chrI	10682180	10682488	309	*	309	10676921	10682374	-	overlapStart	194	114	NearestLocation	1.6601	14.3849	16.8561	WBGene00016391	C34B2.6
X0757	chrI	10683451	10683771	321	*	321	10682471	10683150	-	upstream	-301	301	NearestLocation	1.76329	4.28909	6.00837	WBGene00016395	C34B2.10
X0758	chrI	10718348	10718594	247	*	247	10713450	10718201	-	upstream	-147	147	NearestLocation	1.94515	8.17636	10.2002	WBGene00015017	B0205.1
X0759	chrI	10726229	10726808	580	*	580	10724161	10726136	-	upstream	-93	93	NearestLocation	1.68239	3.08333	4.70145	WBGene00015018	srz-85
X0760	chrI	10728725	10729261	537	*	537	10727751	10728795	-	overlapStart	70	70	NearestLocation	1.64537	3.08887	4.70654	WBGene00044644	B0205.13
X0761	chrI	10729689	10730011	323	*	323	10728895	10730237	-	inside	548	226	NearestLocation	1.75643	13.6746	16.0874	WBGene00015022	B0205.8
X0762	chrI	10731108	10731376	269	*	269	10730467	10730712	+	downstream	641	396	NearestLocation	1.55679	10.1649	12.3222	WBGene00044413	B0205.12
X0763	chrI	10748437	10748760	324	*	324	10750030	10750293	+	upstream	-1593	1270	NearestLocation	1.93123	13.8267	16.2566	WBGene00200786	H36N01.4
X0764	chrI	10750622	10751300	679	*	679	10750563	10750705	-	overlapStart	83	59	NearestLocation	1.64544	2.51498	4.07884	WBGene00201753	H36N01.5
X0765	chrI	10754366	10754643	278	*	278	10753066	10753212	-	upstream	-1154	1154	NearestLocation	1.41373	1.108	2.51464	WBGene00199978	H36N01.3
X0766	chrI	10757030	10757539	510	*	510	10757145	10757203	-	includeFeature	173	115	NearestLocation	1.46591	8.78885	10.8518	WBGene00200840	R13H8.4
X0767	chrI	10759050	10759831	782	*	782	10757145	10757203	-	upstream	-1847	1847	NearestLocation	1.93055	7.56438	9.53603	WBGene00200840	R13H8.4
X0768	chrI	10760232	10760579	348	*	348	10757145	10757203	-	upstream	-3029	3029	NearestLocation	1.54183	2.2126	3.75055	WBGene00200840	R13H8.4
X0769	chrI	10762300	10762576	277	*	277	10757145	10757203	-	upstream	-5097	5097	NearestLocation	1.80284	5.69254	7.52515	WBGene00200840	R13H8.4
X0770	chrI	10762986	10763268	283	*	283	10757145	10757203	-	upstream	-5783	5783	NearestLocation	1.55479	2.63274	4.20895	WBGene00200840	R13H8.4
X0771	chrI	10765538	10766093	556	*	556	10770088	10770210	-	downstream	4672	3995	NearestLocation	1.38076	6.79268	8.70948	WBGene00201678	R13H8.5
X0772	chrI	10768840	10769387	548	*	548	10770088	10770210	-	downstream	1370	701	NearestLocation	1.5326	3.85646	5.52715	WBGene00201678	R13H8.5
X0773	chrI	10769985	10770238	254	*	254	10770088	10770210	-	includeFeature	225	28	NearestLocation	1.62565	12.4772	14.8039	WBGene00201678	R13H8.5
X0774	chrI	10771413	10771912	500	*	500	10770571	10770720	-	upstream	-693	693	NearestLocation	1.42372	6.36589	8.24208	WBGene00199318	R13H8.3
X0775	chrI	10777324	10777582	259	*	259	10781278	10781400	-	downstream	4076	3696	NearestLocation	1.61741	10.6628	12.8568	WBGene00219972	F55A3.8
X0776	chrI	10830373	10830958	586	*	586	10831901	10834812	+	upstream	-1528	943	NearestLocation	1.70624	4.29503	6.01442	WBGene00016456	C35E7.4
X0777	chrI	10857980	10858450	471	*	471	10858078	10858150	+	includeFeature	-98	98	NearestLocation	1.77447	4.45596	6.17337	WBGene00220142	Y37F4.15
X0778	chrI	10927088	10927734	647	*	647	10927581	10927663	-	includeFeature	575	71	NearestLocation	1.86599	8.08653	10.0917	WBGene00196718	F49D11.12
X0779	chrI	10973069	10973335	267	*	267	10970493	10980111	+	inside	2576	2576	NearestLocation	2.03031	7.5932	9.57067	WBGene00013123	Y52B11A.3
X0780	chrI	11095822	11096222	401	*	401	11096994	11097055	+	upstream	-1172	772	NearestLocation	1.39437	4.33511	6.05922	WBGene00255576	mir-8190
X0781	chrI	11101843	11102278	436	*	436	11096994	11097055	+	downstream	4849	4788	NearestLocation	1.56891	2.1143	3.63869	WBGene00255576	mir-8190
X0782	chrI	11186721	11187194	474	*	474	11182817	11186137	+	downstream	3904	584	NearestLocation	1.44339	1.71122	3.1947	WBGene00005517	sri-5
X0783	chrI	11187461	11187912	452	*	452	11182817	11186137	+	downstream	4644	1324	NearestLocation	1.68453	4.15493	5.86851	WBGene00005517	sri-5
X0784	chrI	11280620	11281027	408	*	408	11276492	11280020	-	upstream	-600	600	NearestLocation	1.31503	3.53309	5.19026	WBGene00009461	madf-2
X0785	chrI	11319880	11320131	252	*	252	11311517	11323110	-	inside	3230	2979	NearestLocation	1.87314	6.26593	8.14424	WBGene00010416	hxk-2
X0786	chrI	11322791	11323104	314	*	314	11311517	11323110	-	inside	319	6	NearestLocation	2.03274	8.91811	10.9837	WBGene00010416	hxk-2
X0787	chrI	11374908	11375161	254	*	254	11374624	11380133	+	inside	284	284	NearestLocation	1.46427	6.71083	8.62549	WBGene00010159	F56G4.4
X0788	chrI	11516662	11516913	252	*	252	11517566	11526962	+	upstream	-904	653	NearestLocation	1.64451	7.77176	9.76497	WBGene00009314	F32B4.4
X0789	chrI	11520207	11520487	281	*	281	11519974	11520102	-	upstream	-105	105	NearestLocation	1.63773	10.4206	12.5934	WBGene00219929	F32B4.12
X0790	chrI	11520733	11520992	260	*	260	11517748	11520660	-	upstream	-73	73	NearestLocation	1.73064	8.44639	10.4825	WBGene00009315	F32B4.5
X0791	chrI	11578537	11579826	1290	*	1290	11579706	11579778	-	includeFeature	1241	48	NearestLocation	2.06807	18.3071	21.0891	WBGene00014332	F15D3.t1
X0792	chrI	11611301	11611571	271	*	271	11604604	11611301	-	overlapStart	0	0	NearestLocation	1.57037	5.35104	7.1556	WBGene00007640	C17D12.7
X0793	chrI	11664839	11665092	254	*	254	11666412	11666470	+	upstream	-1573	1320	NearestLocation	1.60229	11.6471	13.9158	WBGene00197259	F11A6.8
X0794	chrI	11670089	11670349	261	*	261	11669994	11670094	-	overlapStart	5	5	NearestLocation	1.55471	10.0883	12.2453	WBGene00202175	F11A6.14
X0795	chrI	11676096	11676372	277	*	277	11675941	11680967	+	inside	155	155	NearestLocation	1.98845	11.3926	13.6403	WBGene00002232	kpc-1
X0796	chrI	11678735	11678991	257	*	257	11678461	11678550	-	upstream	-185	185	NearestLocation	1.60032	8.48115	10.521	WBGene00200910	F11A6.12
X0797	chrI	11680196	11680651	456	*	456	11678461	11678550	-	upstream	-1646	1646	NearestLocation	1.53913	2.8298	4.42351	WBGene00200910	F11A6.12
X0798	chrI	11681457	11681856	400	*	400	11680504	11682364	-	inside	907	508	NearestLocation	1.48039	1.69111	3.17229	WBGene00008681	scrm-4
X0799	chrI	11702100	11702574	475	*	475	11701631	11703704	+	inside	469	469	NearestLocation	1.34638	3.25953	4.89436	WBGene00011936	pgrn-1
X0800	chrI	11773515	11774013	499	*	499	11773564	11773987	+	includeFeature	-49	26	NearestLocation	1.28357	3.43069	5.07214	WBGene00197785	ZK1151.4
X0801	chrI	11777946	11778259	314	*	314	11773564	11773987	+	downstream	4382	3959	NearestLocation	1.81659	11.7597	14.0326	WBGene00197785	ZK1151.4
X0802	chrI	11780469	11780748	280	*	280	11773564	11773987	+	downstream	6905	6482	NearestLocation	1.86657	11.4696	13.7238	WBGene00197785	ZK1151.4
X0803	chrI	11783053	11783433	381	*	381	11747428	11792118	-	inside	9065	8685	NearestLocation	1.26413	2.54976	4.1196	WBGene00006876	vab-10
X0804	chrI	11788126	11788397	272	*	272	11747428	11792118	-	inside	3992	3721	NearestLocation	1.82486	10.2074	12.3687	WBGene00006876	vab-10
X0805	chrI	11789822	11790189	368	*	368	11747428	11792118	-	inside	2296	1929	NearestLocation	1.21692	1.64342	3.11696	WBGene00006876	vab-10
X0806	chrI	11797135	11797488	354	*	354	11797032	11797932	-	inside	797	103	NearestLocation	2.04671	13.4748	15.8784	WBGene00011384	T02G6.1
X0807	chrI	11826572	11826845	274	*	274	11824976	11825787	-	upstream	-785	785	NearestLocation	1.51905	4.31871	6.03909	WBGene00077772	T02G6.10
X0808	chrI	11827644	11827907	264	*	264	11827549	11828619	-	inside	975	95	NearestLocation	1.78557	8.36928	10.4005	WBGene00011390	T02G6.7
X0809	chrI	11839340	11839898	559	*	559	11837979	11838112	+	downstream	1361	1228	NearestLocation	1.7588	3.60298	5.26981	WBGene00201976	Y47H9C.20
X0810	chrI	11844734	11845006	273	*	273	11837979	11838112	+	downstream	6755	6622	NearestLocation	1.69965	8.29229	10.3157	WBGene00201976	Y47H9C.20
X0811	chrI	11870269	11870523	255	*	255	11851343	11868105	-	upstream	-2164	2164	NearestLocation	1.83476	5.87509	7.724	WBGene00000415	ced-1
X0812	chrI	11872747	11872996	250	*	250	11851343	11868105	-	upstream	-4642	4642	NearestLocation	1.54719	2.70355	4.29097	WBGene00000415	ced-1
X0813	chrI	11873456	11873751	296	*	296	11877803	11887281	+	upstream	-4347	4052	NearestLocation	1.46069	1.85568	3.35504	WBGene00001045	dnj-27
X0814	chrI	11897605	11897898	294	*	294	11897407	11898521	+	inside	198	198	NearestLocation	1.65118	2.64976	4.22519	WBGene00012956	Y47H9C.14
X0815	chrI	11909427	11909684	258	*	258	11907555	11909280	-	upstream	-147	147	NearestLocation	1.60961	9.54357	11.6567	WBGene00001372	exo-3
X0816	chrI	11910928	11911177	250	*	250	11910328	11911021	-	overlapStart	93	93	NearestLocation	1.57319	10.1112	12.2658	WBGene00011156	R09B3.3
X0817	chrI	11911667	11911924	258	*	258	11911324	11912049	+	inside	343	125	NearestLocation	1.62328	4.60776	6.3549	WBGene00006707	ubc-12
X0818	chrI	11925603	11925907	305	*	305	11917742	11923915	-	upstream	-1688	1688	NearestLocation	2.25206	10.3825	12.5552	WBGene00011058	fdps-1
X0819	chrI	11927179	11927475	297	*	297	11924785	11929507	-	inside	2328	2032	NearestLocation	1.68602	5.39854	7.20815	WBGene00006958	wve-1
X0820	chrI	11928720	11929045	326	*	326	11924785	11929507	-	inside	787	462	NearestLocation	1.76165	16.9131	19.5834	WBGene00006958	wve-1
X0821	chrI	11930610	11930875	266	*	266	11930725	11931759	+	overlapStart	-115	115	NearestLocation	1.77935	14.3466	16.8117	WBGene00011059	R06C1.4
X0822	chrI	11931397	11931687	291	*	291	11930725	11931759	+	inside	672	72	NearestLocation	1.71931	12.4719	14.7973	WBGene00011059	R06C1.4
X0823	chrI	11934435	11934935	501	*	501	11933465	11933575	-	upstream	-860	860	NearestLocation	1.63699	7.16404	9.10556	WBGene00199432	R06C1.10
X0824	chrI	11936042	11936632	591	*	591	11933465	11933575	-	upstream	-2467	2467	NearestLocation	1.76229	4.36568	6.08486	WBGene00199432	R06C1.10
X0825	chrI	11937926	11938299	374	*	374	11933465	11933575	-	upstream	-4351	4351	NearestLocation	1.58364	2.59705	4.16655	WBGene00199432	R06C1.10
X0826	chrI	11939683	11940541	859	*	859	11943666	11943815	+	upstream	-3983	3125	NearestLocation	1.62151	2.42382	3.97753	WBGene00201448	R06C1.13
X0827	chrI	11950500	11950764	265	*	265	11949822	11949894	-	upstream	-606	606	NearestLocation	1.83764	8.0896	10.1021	WBGene00200232	R06C1.12
X0828	chrI	11951461	11951821	361	*	361	11951990	11952214	+	upstream	-529	169	NearestLocation	1.41847	3.38633	5.03043	WBGene00200101	R06C1.11
X0829	chrI	11966255	11966556	302	*	302	11966271	11967591	+	overlapStart	-16	16	NearestLocation	1.78346	5.20838	7.00101	WBGene00014915	Y53C10A.1
X0830	chrI	11998852	11999676	825	*	825	11998781	12002735	+	inside	71	71	NearestLocation	1.586	2.0578	3.57529	WBGene00013136	Y53C10A.5
X0831	chrI	12038932	12039204	273	*	273	12041035	12042986	+	upstream	-2103	1831	NearestLocation	1.40031	1.89646	3.39589	WBGene00010244	F58D5.5
X0832	chrI	12041113	12041449	337	*	337	12041035	12042986	+	inside	78	78	NearestLocation	1.57398	12.7829	15.1381	WBGene00010244	F58D5.5
X0833	chrI	12046223	12046575	353	*	353	12045236	12046593	-	inside	370	18	NearestLocation	2.29192	14.7128	17.2198	WBGene00010248	F58D5.9
X0834	chrI	12046930	12047177	248	*	248	12045236	12046593	-	upstream	-337	337	NearestLocation	1.52722	7.06732	9.00635	WBGene00010248	F58D5.9
X0835	chrI	12047938	12048196	259	*	259	12045236	12046593	-	upstream	-1345	1345	NearestLocation	1.50417	9.89154	12.0288	WBGene00010248	F58D5.9
X0836	chrI	12055359	12055805	447	*	447	12047340	12059800	-	inside	4441	3995	NearestLocation	1.5241	1.54604	3.00894	WBGene00002240	ksr-2
X0837	chrI	12064134	12064762	629	*	629	12060276	12064897	-	inside	763	135	NearestLocation	1.49946	4.46972	6.209	WBGene00002000	hrp-2
X0838	chrI	12065340	12065626	287	*	287	12065865	12065937	+	upstream	-525	239	NearestLocation	1.4717	8.41055	10.4384	WBGene00014411	F58D5.t1
X0839	chrI	12107097	12107364	268	*	268	12106912	12108458	-	inside	1361	185	NearestLocation	2.06542	10.2225	12.3874	WBGene00010825	M01G12.14
X0840	chrI	12205369	12205669	301	*	301	12207097	12212206	+	upstream	-1728	1428	NearestLocation	1.44779	3.00255	4.61041	WBGene00007602	C15C6.3
X0841	chrI	12429795	12430080	286	*	286	12430029	12431474	-	overlapEnd	1679	51	NearestLocation	1.599	5.27267	7.07551	WBGene00008477	clec-17
X0842	chrI	12430300	12430553	254	*	254	12430029	12431474	-	inside	1174	271	NearestLocation	1.85822	4.90021	6.67188	WBGene00008477	clec-17
X0843	chrI	12503698	12503945	248	*	248	12505098	12508064	+	upstream	-1400	1153	NearestLocation	1.55145	6.97872	8.91172	WBGene00010769	asah-1
X0844	chrI	12504425	12504679	255	*	255	12505098	12508064	+	upstream	-673	419	NearestLocation	1.66985	6.4142	8.30295	WBGene00010769	asah-1
X0845	chrI	12508217	12508483	267	*	267	12508449	12513405	+	overlapStart	-232	34	NearestLocation	1.63258	7.92264	9.92001	WBGene00006829	unc-101
X0846	chrI	12516489	12516766	278	*	278	12519194	12527553	+	upstream	-2705	2428	NearestLocation	1.80874	11.3878	13.6364	WBGene00010770	K11D2.4
X0847	chrI	12517388	12517670	283	*	283	12519194	12527553	+	upstream	-1806	1524	NearestLocation	1.84486	7.44966	9.41163	WBGene00010770	K11D2.4
X0848	chrI	12520561	12520949	389	*	389	12521525	12521646	-	downstream	1085	576	NearestLocation	1.6312	3.78282	5.45807	WBGene00199394	K11D2.6
X0849	chrI	12523336	12523632	297	*	297	12521525	12521646	-	upstream	-1690	1690	NearestLocation	1.497	8.84128	10.8992	WBGene00199394	K11D2.6
X0850	chrI	12524164	12524822	659	*	659	12521525	12521646	-	upstream	-2518	2518	NearestLocation	1.44756	6.48795	8.37706	WBGene00199394	K11D2.6
X0851	chrI	12525386	12525644	259	*	259	12521525	12521646	-	upstream	-3740	3740	NearestLocation	1.76869	7.87769	9.86762	WBGene00199394	K11D2.6
X0852	chrI	12531188	12531677	490	*	490	12528312	12532182	-	inside	994	505	NearestLocation	1.51058	7.02415	8.94263	WBGene00004181	pri-2
X0853	chrI	12533119	12533419	301	*	301	12532669	12534355	+	inside	450	450	NearestLocation	1.67644	10.1748	12.3335	WBGene00012208	W02D9.2
X0854	chrI	12535121	12535537	417	*	417	12535322	12537671	+	overlapStart	-201	201	NearestLocation	1.44736	6.05471	7.9002	WBGene00012209	hmg-20
X0855	chrI	12545302	12545637	336	*	336	12551538	12552370	+	upstream	-6236	5901	NearestLocation	1.60812	2.18229	3.71605	WBGene00012216	W02D9.10
X0856	chrI	12546532	12546863	332	*	332	12551538	12552370	+	upstream	-5006	4675	NearestLocation	1.94139	19.0902	21.942	WBGene00012216	W02D9.10
X0857	chrI	12547939	12548798	860	*	860	12551538	12552370	+	upstream	-3599	2740	NearestLocation	1.48223	2.02817	3.54459	WBGene00012216	W02D9.10
X0858	chrI	12550642	12551966	1325	*	1325	12551538	12552370	+	overlapStart	-896	404	NearestLocation	1.54643	8.39407	10.4161	WBGene00012216	W02D9.10
X0859	chrI	12567171	12567430	260	*	260	12564356	12565893	+	downstream	2815	1278	NearestLocation	1.59769	10.8637	13.0745	WBGene00008216	mec-19
X0860	chrI	12568164	12568677	514	*	514	12564356	12565893	+	downstream	3808	2271	NearestLocation	1.57561	10.7115	12.9168	WBGene00008216	mec-19
X0861	chrI	12568946	12569400	455	*	455	12565799	12572801	-	inside	3855	3147	NearestLocation	1.52474	9.19717	11.287	WBGene00001008	dlk-1
X0862	chrI	12570527	12571017	491	*	491	12565799	12572801	-	inside	2274	1784	NearestLocation	1.84469	14.9513	17.482	WBGene00001008	dlk-1
X0863	chrI	12571223	12572127	905	*	905	12565799	12572801	-	inside	1578	674	NearestLocation	1.79449	17.0907	19.7832	WBGene00001008	dlk-1
X0864	chrI	12572349	12572743	395	*	395	12565799	12572801	-	inside	452	58	NearestLocation	1.61667	12.3497	14.6706	WBGene00001008	dlk-1
X0865	chrI	12573428	12574289	862	*	862	12565799	12572801	-	upstream	-627	627	NearestLocation	1.70722	8.76578	10.8179	WBGene00001008	dlk-1
X0866	chrI	12575740	12576054	315	*	315	12565799	12572801	-	upstream	-2939	2939	NearestLocation	1.32896	4.39445	6.11423	WBGene00001008	dlk-1
X0867	chrI	12578025	12578274	250	*	250	12578108	12579205	-	overlapEnd	1180	83	NearestLocation	1.56609	9.5969	11.7178	WBGene00077769	F33E2.10
X0868	chrI	12651335	12651712	378	*	378	12647376	12652087	-	inside	752	375	NearestLocation	1.91314	15.3894	17.9369	WBGene00010420	mcrs-1
X0869	chrI	12652226	12653090	865	*	865	12652277	12654646	+	overlapStart	-51	51	NearestLocation	1.46285	8.598	10.6348	WBGene00010419	H28O16.1
X0870	chrI	12653366	12653622	257	*	257	12652385	12652405	+	downstream	981	961	NearestLocation	1.58782	8.76173	10.8231	WBGene00168505	21ur-12279
X0871	chrI	12676309	12676564	256	*	256	12677525	12677597	+	upstream	-1216	961	NearestLocation	1.66887	8.13852	10.1531	WBGene00198187	T26E3.15
X0872	chrI	12677765	12678024	260	*	260	12677525	12677597	-	upstream	-168	168	NearestLocation	1.62426	10.2532	12.4194	WBGene00198744	T26E3.16
X0873	chrI	12736840	12737087	248	*	248	12738087	12741149	+	upstream	-1247	1000	NearestLocation	1.34351	5.02377	6.8026	WBGene00012194	toe-4
X0874	chrI	12738042	12738562	521	*	521	12738087	12741149	+	overlapStart	-45	45	NearestLocation	1.41824	5.41981	7.2243	WBGene00012194	toe-4
X0875	chrI	12740565	12740814	250	*	250	12733299	12741227	-	inside	662	413	NearestLocation	1.65621	4.88622	6.65111	WBGene00012193	vps-25
X0876	chrI	12773098	12773577	480	*	480	12773659	12782257	+	upstream	-561	82	NearestLocation	1.56593	1.78408	3.27605	WBGene00007094	B0019.2
X0877	chrI	12811358	12811801	444	*	444	12807531	12809296	-	upstream	-2062	2062	NearestLocation	2.21016	20.6074	23.5754	WBGene00012475	Y18D10A.2
X0878	chrI	12815179	12815907	729	*	729	12815904	12816428	+	overlapStart	-725	3	NearestLocation	1.39248	8.05854	10.0629	WBGene00012477	Y18D10A.4
X0879	chrI	12824457	12824757	301	*	301	12824119	12824172	+	downstream	338	285	NearestLocation	1.91009	5.71652	7.54535	WBGene00220135	Y18D10A.29
X0880	chrI	12827556	12827854	299	*	299	12825687	12834143	+	inside	1869	1869	NearestLocation	1.73745	9.54597	11.6646	WBGene00003735	nhx-8
X0881	chrI	12833155	12833446	292	*	292	12834665	12843233	+	upstream	-1510	1219	NearestLocation	1.49861	4.6143	6.36377	WBGene00004231	ptr-17
X0882	chrI	12880575	12880828	254	*	254	12878595	12902804	+	inside	1980	1980	NearestLocation	1.67121	8.91214	10.9855	WBGene00003905	pad-1
X0883	chrI	12887435	12887918	484	*	484	12878595	12902804	+	inside	8840	8840	NearestLocation	1.40016	2.39291	3.94781	WBGene00003905	pad-1
X0884	chrI	12904481	12904956	476	*	476	12904470	12906358	+	inside	11	11	NearestLocation	1.34561	3.26136	4.89059	WBGene00012484	car-1
X0885	chrI	12911938	12912302	365	*	365	12908304	12909436	-	upstream	-2502	2502	NearestLocation	1.5509	2.20249	3.73552	WBGene00077556	Y18D10A.27
X0886	chrI	12917615	12918011	397	*	397	12918722	12919293	+	upstream	-1107	711	NearestLocation	1.82184	7.94806	9.94625	WBGene00001427	fkb-2
X0887	chrI	12918673	12919227	555	*	555	12918722	12919293	+	overlapStart	-49	49	NearestLocation	1.5206	8.26673	10.2856	WBGene00001427	fkb-2
X0888	chrI	12920644	12921236	593	*	593	12922004	12923546	+	upstream	-1360	768	NearestLocation	1.71912	4.86114	6.612	WBGene00003989	pfn-1
X0889	chrI	12938604	12938927	324	*	324	12938555	12942219	+	inside	49	49	NearestLocation	1.79534	5.67688	7.50619	WBGene00008564	acox-1
X0890	chrI	12942997	12943249	253	*	253	12942280	12946585	+	inside	717	717	NearestLocation	1.79801	10.6497	12.8459	WBGene00008565	acox-2
X0891	chrI	12964992	12965351	360	*	360	12962039	12964579	-	upstream	-413	413	NearestLocation	1.36018	4.61804	6.36035	WBGene00008131	C47B2.2
X0892	chrI	12966001	12966531	531	*	531	12964679	12966876	-	inside	875	345	NearestLocation	1.34543	5.65587	7.49192	WBGene00006529	tba-2
X0893	chrI	12967401	12967658	258	*	258	12964679	12966876	-	upstream	-525	525	NearestLocation	1.80839	13.9312	16.3655	WBGene00006529	tba-2
X0894	chrI	12967914	12968191	278	*	278	12967216	12968282	-	inside	368	91	NearestLocation	1.25353	2.75912	4.34633	WBGene00003948	pbs-2
X0895	chrI	12968918	12969192	275	*	275	12968921	12970238	+	overlapStart	-3	3	NearestLocation	1.65416	11.1261	13.3536	WBGene00001234	eif-6
X0896	chrI	12969625	12970042	418	*	418	12968921	12970238	+	inside	704	196	NearestLocation	1.35526	5.40703	7.21253	WBGene00001234	eif-6
X0897	chrI	13002763	13003544	782	*	782	13004438	13023572	+	upstream	-1675	894	NearestLocation	2.12266	10.9202	13.1361	WBGene00004063	pmr-1
X0898	chrI	13029393	13030299	907	*	907	13033520	13045537	+	upstream	-4127	3221	NearestLocation	2.09659	8.36382	10.3959	WBGene00012274	W05B5.1
X0899	chrI	13030849	13031900	1052	*	1052	13033520	13045537	+	upstream	-2671	1620	NearestLocation	1.72208	3.94624	5.64271	WBGene00012274	W05B5.1
X0900	chrI	13032968	13033998	1031	*	1031	13033520	13045537	+	overlapStart	-552	478	NearestLocation	2.0887	12.2414	14.5593	WBGene00012274	W05B5.1
X0901	chrI	13034767	13035037	271	*	271	13033520	13045537	+	inside	1247	1247	NearestLocation	1.80204	4.06755	5.77569	WBGene00012274	W05B5.1
X0902	chrI	13035591	13036381	791	*	791	13033520	13045537	+	inside	2071	2071	NearestLocation	1.81815	4.81544	6.56739	WBGene00012274	W05B5.1
X0903	chrI	13036627	13036938	312	*	312	13033520	13045537	+	inside	3107	3107	NearestLocation	1.88973	15.4051	17.9517	WBGene00012274	W05B5.1
X0904	chrI	13040564	13040833	270	*	270	13033520	13045537	+	inside	7044	4704	NearestLocation	1.46556	1.51304	2.97162	WBGene00012274	W05B5.1
X0905	chrI	13057162	13057409	248	*	248	13056091	13062122	-	inside	4960	1071	NearestLocation	1.88137	4.62189	6.3737	WBGene00003675	nhr-85
X0906	chrI	13155387	13156132	746	*	746	13156343	13156434	+	upstream	-956	211	NearestLocation	1.30428	2.62099	4.19289	WBGene00196907	F22G12.9
X0907	chrI	13162446	13162709	264	*	264	13162499	13182808	+	overlapStart	-53	53	NearestLocation	1.95644	10.3779	12.5518	WBGene00009065	F22G12.5
X0908	chrI	13190252	13190519	268	*	268	13189792	13190583	-	inside	331	64	NearestLocation	1.76302	7.42357	9.3885	WBGene00138716	F17B5.10
X0909	chrI	13289777	13290027	251	*	251	13287551	13289546	-	upstream	-231	231	NearestLocation	1.51821	7.03913	8.97487	WBGene00010807	M01E5.4
X0910	chrI	13290909	13291182	274	*	274	13292514	13297227	+	upstream	-1605	1332	NearestLocation	1.57709	9.22282	11.315	WBGene00006595	top-1
X0911	chrI	13315983	13316238	256	*	256	13310896	13318704	-	inside	2721	2466	NearestLocation	1.59584	6.53622	8.43076	WBGene00011433	pde-1
X0912	chrI	13339772	13340084	313	*	313	13340334	13343936	+	upstream	-562	250	NearestLocation	1.23422	2.66609	4.24002	WBGene00012344	ola-1
X0913	chrI	13350799	13351436	638	*	638	13349410	13358674	+	inside	1389	1389	NearestLocation	1.42619	1.71717	3.19933	WBGene00012734	Y40B1A.3
X0914	chrI	13351969	13352226	258	*	258	13349410	13358674	+	inside	2559	2559	NearestLocation	1.59226	8.51258	10.5553	WBGene00012734	Y40B1A.3
X0915	chrI	13368510	13369161	652	*	652	13369999	13370080	-	downstream	1570	838	NearestLocation	1.60524	3.68345	5.35784	WBGene00199416	Y40B1A.5
X0916	chrI	13370434	13371001	568	*	568	13370685	13370819	-	includeFeature	385	182	NearestLocation	1.67732	4.39729	6.13456	WBGene00220147	Y40B1A.6
X0917	chrI	13371217	13372123	907	*	907	13370685	13370819	-	upstream	-398	398	NearestLocation	1.46125	2.82414	4.42172	WBGene00220147	Y40B1A.6
X0918	chrI	13384573	13384866	294	*	294	13384752	13387084	+	overlapStart	-179	114	NearestLocation	1.7953	11.9284	14.2148	WBGene00007217	tads-1
X0919	chrI	13396922	13397238	317	*	317	13397268	13398528	+	upstream	-346	30	NearestLocation	2.11762	12.2624	14.5757	WBGene00007214	C01A2.2
X0920	chrI	13433780	13434443	664	*	664	13435487	13437965	+	upstream	-1707	1044	NearestLocation	1.60819	4.13315	5.84422	WBGene00012738	eif-3.J
X0921	chrI	13435431	13435747	317	*	317	13435487	13437965	+	overlapStart	-56	56	NearestLocation	1.46988	7.65058	9.62146	WBGene00012738	eif-3.J
X0922	chrI	13438778	13439070	293	*	293	13438492	13438592	+	downstream	286	186	NearestLocation	1.38879	5.03806	6.81436	WBGene00220148	Y40B1B.10
X0923	chrI	13485123	13485645	523	*	523	13477258	13487404	-	inside	2281	1759	NearestLocation	1.63508	5.03416	6.82124	WBGene00013019	Y48G10A.2
X0924	chrI	13487049	13487301	253	*	253	13477258	13487404	-	inside	355	103	NearestLocation	1.75037	8.99746	11.0742	WBGene00013019	Y48G10A.2
X0925	chrI	13488756	13489004	249	*	249	13489560	13491235	+	upstream	-804	556	NearestLocation	2.25156	12.4108	14.7384	WBGene00013018	Y48G10A.1
X0926	chrI	13489753	13490005	253	*	253	13489560	13491235	+	inside	193	193	NearestLocation	1.77674	7.94896	9.94537	WBGene00013018	Y48G10A.1
X0927	chrI	13543748	13543999	252	*	252	13543094	13545188	-	inside	1440	654	NearestLocation	2.16081	7.76948	9.76074	WBGene00000089	aex-6
X0928	chrI	13547234	13547526	293	*	293	13543094	13545188	-	upstream	-2046	2046	NearestLocation	1.57449	10.0732	12.2219	WBGene00000089	aex-6
X0929	chrI	13557990	13558545	556	*	556	13548074	13559361	-	inside	1371	816	NearestLocation	1.79774	4.2812	5.99225	WBGene00006936	vars-2
X0930	chrI	13559052	13559408	357	*	357	13548074	13559361	-	overlapStart	309	47	NearestLocation	2.2019	22.7485	25.882	WBGene00006936	vars-2
X0931	chrI	13560602	13560885	284	*	284	13560528	13563465	+	inside	74	74	NearestLocation	1.56979	1.8141	3.30883	WBGene00013602	Y87G2A.16
X0932	chrI	13562334	13562721	388	*	388	13560528	13563465	+	inside	1806	744	NearestLocation	1.70125	4.79821	6.5619	WBGene00013602	Y87G2A.16
X0933	chrI	13575288	13575977	690	*	690	13576248	13581592	+	upstream	-960	271	NearestLocation	1.93588	6.57747	8.46708	WBGene00013597	gpi-1
X0934	chrI	13576246	13576688	443	*	443	13576248	13581592	+	overlapStart	-2	2	NearestLocation	1.55168	2.41312	3.97002	WBGene00013597	gpi-1
X0935	chrI	13577543	13577924	382	*	382	13576248	13581592	+	inside	1295	1295	NearestLocation	1.94118	7.87042	9.85898	WBGene00013597	gpi-1
X0936	chrI	13652979	13653628	650	*	650	13652939	13653704	-	inside	725	40	NearestLocation	1.46369	7.48769	9.44776	WBGene00004445	rpl-31
X0937	chrI	13654904	13655345	442	*	442	13654029	13658165	+	inside	875	875	NearestLocation	1.51576	8.49551	10.5336	WBGene00012353	W09C5.7
X0938	chrI	13656274	13656543	270	*	270	13654029	13658165	+	inside	2245	1622	NearestLocation	1.48925	7.00495	8.93111	WBGene00012353	W09C5.7
X0939	chrI	13658470	13659210	741	*	741	13658171	13659128	-	overlapStart	658	82	NearestLocation	1.53387	8.97042	11.0411	WBGene00012354	W09C5.8
X0940	chrI	13666825	13667135	311	*	311	13663485	13674964	+	inside	3340	3340	NearestLocation	1.52386	8.25726	10.2691	WBGene00012234	W04A4.5
X0941	chrI	13687291	13687579	289	*	289	13685300	13687571	-	overlapStart	280	8	NearestLocation	1.95043	11.3648	13.611	WBGene00012235	W04A4.6
X0942	chrI	13814939	13815528	590	*	590	13812135	13814355	-	upstream	-584	584	NearestLocation	1.42015	8.75045	10.7987	WBGene00012371	W09G3.8
X0943	chrI	13819836	13820337	502	*	502	13820441	13820492	+	upstream	-605	104	NearestLocation	1.55049	4.10265	5.80022	WBGene00196468	W09G3.12
X0944	chrI	13828170	13828452	283	*	283	13814751	13827981	-	upstream	-189	189	NearestLocation	1.66811	12.4973	14.8249	WBGene00012369	W09G3.6
X0945	chrI	13854219	13854467	249	*	249	13854640	13859551	+	upstream	-421	173	NearestLocation	1.57927	4.45934	6.19974	WBGene00012241	W04A8.6
X0946	chrI	13856636	13857228	593	*	593	13854640	13859551	+	inside	1996	1996	NearestLocation	1.54335	4.40871	6.14703	WBGene00012241	W04A8.6
X0947	chrI	13951733	13953435	1703	*	1703	13951750	13951876	-	includeFeature	143	17	NearestLocation	1.50639	8.01861	10.0194	WBGene00200705	Y71A12B.30
X0948	chrI	13965453	13965723	271	*	271	13969844	13970877	+	upstream	-4391	4121	NearestLocation	2.08279	13.7876	16.2092	WBGene00014947	Y71A12B.14
X0949	chrI	14028471	14029121	651	*	651	14028997	14029212	-	overlapEnd	741	91	NearestLocation	1.54791	9.98463	12.1303	WBGene00045396	ZC334.12
X0950	chrI	14050349	14050677	329	*	329	14048085	14051003	-	inside	654	326	NearestLocation	1.4258	6.05744	7.91438	WBGene00004875	smd-1
X0951	chrI	14071226	14071754	529	*	529	14070556	14070619	-	upstream	-607	607	NearestLocation	1.33934	5.17811	6.9702	WBGene00198066	F47G4.13
X0952	chrI	14073674	14074247	574	*	574	14075067	14075163	+	upstream	-1393	820	NearestLocation	1.50364	10.3089	12.4768	WBGene00197035	F47G4.11
X0953	chrI	14101980	14102475	496	*	496	14101277	14104475	+	inside	703	703	NearestLocation	1.37492	4.71801	6.4619	WBGene00006565	tfg-1
X0954	chrI	14103977	14104226	250	*	250	14101277	14104475	+	inside	2700	249	NearestLocation	1.32977	5.381	7.19259	WBGene00006565	tfg-1
X0955	chrI	14112698	14113112	415	*	415	14104429	14113179	-	inside	481	67	NearestLocation	1.53424	2.88783	4.48803	WBGene00001047	dnj-29
X0956	chrI	14113551	14113817	267	*	267	14113636	14114091	+	overlapStart	-85	85	NearestLocation	1.54641	9.635	11.7566	WBGene00013406	Y63D3A.7
X0957	chrI	14114528	14114812	285	*	285	14114194	14118654	+	inside	334	334	NearestLocation	1.86611	12.2703	14.5814	WBGene00013407	Y63D3A.8
X0958	chrI	14179206	14179462	257	*	257	14172827	14179360	-	overlapStart	154	102	NearestLocation	1.6419	9.53254	11.6486	WBGene00004202	pry-1
X0959	chrI	14181236	14181487	252	*	252	14172827	14179360	-	upstream	-1876	1876	NearestLocation	1.50688	6.57219	8.47961	WBGene00004202	pry-1
X0960	chrI	14371255	14371712	458	*	458	14371639	14371785	-	overlapEnd	530	73	NearestLocation	1.82828	9.46206	11.5529	WBGene00201101	Y105E8A.47
X0961	chrI	14390008	14390281	274	*	274	14390333	14400222	+	upstream	-325	52	NearestLocation	1.75375	12.0775	14.378	WBGene00002977	lev-10
X0962	chrI	14422342	14422650	309	*	309	14418197	14431811	+	inside	4145	4145	NearestLocation	1.92462	17.3813	20.0835	WBGene00013670	hpo-13
X0963	chrI	14424570	14424832	263	*	263	14418197	14431811	+	inside	6373	6373	NearestLocation	1.57191	5.34891	7.15845	WBGene00013670	hpo-13
X0964	chrI	14461198	14461464	267	*	267	14461141	14465235	-	inside	4037	57	NearestLocation	1.98438	7.28262	9.2357	WBGene00013673	Y105E8A.13
X0965	chrI	14461958	14462239	282	*	282	14461141	14465235	-	inside	3277	817	NearestLocation	2.15925	8.97417	11.046	WBGene00013673	Y105E8A.13
X0966	chrI	14468396	14468835	440	*	440	14468382	14468491	-	overlapStart	95	14	NearestLocation	1.27681	3.26162	4.89672	WBGene00014612	mir-354
X0967	chrI	14469466	14469906	441	*	441	14469506	14476721	+	overlapStart	-40	40	NearestLocation	1.55355	4.69975	6.44377	WBGene00013676	ekl-4
X0968	chrI	14525964	14526231	268	*	268	14529531	14546721	+	upstream	-3567	3300	NearestLocation	1.52611	2.9048	4.51029	WBGene00013683	zoo-1
X0969	chrI	14580699	14580949	251	*	251	14589756	14589830	+	upstream	-9057	8807	NearestLocation	1.64154	6.01927	7.87732	WBGene00198876	Y105E8A.45
X0970	chrI	14602551	14602831	281	*	281	14589756	14589830	-	upstream	-12721	12721	NearestLocation	1.66478	5.39089	7.20415	WBGene00201794	Y105E8A.48
X0971	chrI	14604615	14604968	354	*	354	14567332	14616523	-	inside	11908	11555	NearestLocation	1.5318	2.11797	3.64684	WBGene00013682	Y105E8A.25
X0972	chrI	14614689	14614952	264	*	264	14567332	14616523	-	inside	1834	1571	NearestLocation	1.58456	10.1424	12.3	WBGene00013682	Y105E8A.25
X0973	chrI	14622961	14623481	521	*	521	14620388	14620632	-	upstream	-2329	2329	NearestLocation	1.51948	5.02819	6.79262	WBGene00044265	Y105E8B.11
X0974	chrI	14624542	14624967	426	*	426	14626980	14627052	+	upstream	-2438	2013	NearestLocation	1.32891	3.52132	5.16541	WBGene00202346	Y105E8B.14
X0975	chrI	14625219	14625504	286	*	286	14626980	14627052	+	upstream	-1761	1476	NearestLocation	1.54433	11.281	13.5199	WBGene00202346	Y105E8B.14
X0976	chrI	14635853	14636104	252	*	252	14620759	14631254	-	upstream	-4599	4599	NearestLocation	2.08828	10.4733	12.6555	WBGene00002978	lev-11
X0977	chrI	14647519	14647978	460	*	460	14647782	14651457	+	overlapStart	-263	196	NearestLocation	1.48902	2.54196	4.11079	WBGene00013689	bath-40
X0978	chrI	14649997	14650264	268	*	268	14652045	14657297	+	upstream	-2048	1781	NearestLocation	1.74635	6.88077	8.80814	WBGene00013688	riok-2
X0979	chrI	14655196	14655583	388	*	388	14657355	14661414	+	upstream	-2159	1772	NearestLocation	1.8172	3.92978	5.62636	WBGene00013690	hprt-1
X0980	chrI	14662667	14662932	266	*	266	14662960	14663056	+	upstream	-293	28	NearestLocation	1.58272	8.59008	10.6359	WBGene00220226	Y105E8B.15
X0981	chrI	14668142	14668720	579	*	579	14664449	14674822	+	inside	3693	3693	NearestLocation	1.52385	4.29622	6.00821	WBGene00001334	ero-1
X0982	chrI	14691662	14691925	264	*	264	14688672	14691723	-	overlapStart	61	61	NearestLocation	1.68818	11.6801	13.9507	WBGene00013197	ttm-5
X0983	chrI	14693338	14693586	249	*	249	14694170	14700349	+	upstream	-832	584	NearestLocation	1.61275	11.0056	13.2263	WBGene00013198	Y54E5A.2
X0984	chrI	14718315	14718563	249	*	249	14716612	14719029	+	inside	1703	466	NearestLocation	1.56089	8.21097	10.2316	WBGene00013203	Y54E5A.8
X0985	chrI	14721142	14722148	1007	*	1007	14720587	14721355	-	overlapStart	213	213	NearestLocation	1.57414	8.39526	10.4264	WBGene00010579	K05C4.2
X0986	chrI	14756014	14756324	311	*	311	14755151	14756426	-	inside	412	102	NearestLocation	1.63566	8.2782	10.2964	WBGene00009559	mtx-1
X0987	chrI	14757257	14757510	254	*	254	14756858	14759354	+	inside	399	399	NearestLocation	1.46192	3.73253	5.41368	WBGene00001030	dnj-12
X0988	chrI	14758214	14758488	275	*	275	14758786	14759261	-	downstream	1047	298	NearestLocation	1.78046	10.9338	13.1458	WBGene00043308	F39B2.9
X0989	chrI	14759805	14760159	355	*	355	14759918	14760663	+	overlapStart	-113	113	NearestLocation	1.674	12.9263	15.2887	WBGene00004495	rps-26
X0990	chrI	14760375	14760621	247	*	247	14759918	14760663	+	inside	457	42	NearestLocation	1.61112	13.0244	15.3928	WBGene00004495	rps-26
X0991	chrI	14768773	14769042	270	*	270	14760648	14768980	-	overlapStart	207	62	NearestLocation	1.32213	4.38884	6.11725	WBGene00009558	F39B2.8
X0992	chrI	14846377	14846681	305	*	305	14846478	14850326	+	overlapStart	-101	101	NearestLocation	1.64889	7.82339	9.81161	WBGene00009306	maph-1.1
X0993	chrI	14880628	14880881	254	*	254	14872162	14875378	+	downstream	8466	5250	NearestLocation	1.69441	5.93945	7.79155	WBGene00006845	unc-122
X0994	chrI	14899330	14899659	330	*	330	14875784	14900330	-	inside	1000	671	NearestLocation	1.59556	2.04066	3.55569	WBGene00001488	frm-1
X0995	chrI	14900456	14900752	297	*	297	14875784	14900330	-	upstream	-126	126	NearestLocation	1.66011	2.51383	4.08283	WBGene00001488	frm-1
X0996	chrI	14921780	14922238	459	*	459	14924360	14924453	-	downstream	2673	2122	NearestLocation	1.27753	3.03979	4.66265	WBGene00219910	F21F12.2
X0997	chrI	14923318	14923572	255	*	255	14924360	14924453	-	downstream	1135	788	NearestLocation	1.51313	1.64916	3.12251	WBGene00219910	F21F12.2
X0998	chrI	14926305	14927441	1137	*	1137	14924360	14924453	-	upstream	-1852	1852	NearestLocation	2.12689	10.2595	12.4304	WBGene00219910	F21F12.2
X0999	chrI	14928811	14929176	366	*	366	14929757	14930015	-	downstream	1204	581	NearestLocation	1.5321	1.53561	2.99904	WBGene00219911	F21F12.3
X1000	chrI	14929538	14929809	272	*	272	14929757	14930015	-	overlapEnd	477	52	NearestLocation	1.60002	2.29363	3.84228	WBGene00219911	F21F12.3
X1001	chrI	14931292	14931802	511	*	511	14929757	14930015	-	upstream	-1277	1277	NearestLocation	1.58521	2.26853	3.81081	WBGene00219911	F21F12.3
X1002	chrI	14934360	14934780	421	*	421	14929757	14930015	-	upstream	-4345	4345	NearestLocation	1.51116	1.62838	3.10066	WBGene00219911	F21F12.3
X1003	chrI	14936558	14937003	446	*	446	14929757	14930015	-	upstream	-6543	6543	NearestLocation	1.40945	5.90608	7.76209	WBGene00219911	F21F12.3
X1004	chrI	14940020	14940353	334	*	334	14949930	14949980	-	downstream	9960	9577	NearestLocation	1.57737	10.4	12.572	WBGene00196768	ZK909.7
X1005	chrI	14945556	14945870	315	*	315	14949930	14949980	-	downstream	4424	4060	NearestLocation	1.31234	3.45622	5.09752	WBGene00196768	ZK909.7
X1006	chrI	14946504	14946904	401	*	401	14949930	14949980	-	downstream	3476	3026	NearestLocation	1.73682	11.6548	13.9155	WBGene00196768	ZK909.7
X1007	chrI	14950834	14951142	309	*	309	14949930	14949980	-	upstream	-854	854	NearestLocation	2.26219	16.7704	19.4286	WBGene00196768	ZK909.7
X1008	chrI	14951380	14951671	292	*	292	14949930	14949980	-	upstream	-1400	1400	NearestLocation	1.85923	7.16065	9.10473	WBGene00196768	ZK909.7
X1009	chrI	14952728	14952984	257	*	257	14953490	14955611	+	upstream	-762	506	NearestLocation	1.60791	2.08036	3.60725	WBGene00014148	ZK909.3
X1010	chrI	15040642	15040907	266	*	266	15040427	15041274	-	inside	632	215	NearestLocation	1.25773	2.55658	4.12648	WBGene00000881	cyn-5
X1011	chrII	18933	19275	343	*	343	18637	18697	-	upstream	-236	236	NearestLocation	1.25962	2.89155	4.48858	WBGene00255561	mir-8186.2
X1012	chrII	23602	24225	624	*	624	23328	24457	+	inside	274	232	NearestLocation	1.51638	6.90694	8.82413	WBGene00005017	sqt-2
X1013	chrII	28383	28732	350	*	350	25407	28418	-	overlapStart	35	35	NearestLocation	1.60557	2.79734	4.38267	WBGene00017745	F23F1.4
X1014	chrII	29105	29463	359	*	359	25407	28418	-	upstream	-687	687	NearestLocation	1.48664	1.74309	3.22786	WBGene00017745	F23F1.4
X1015	chrII	34917	35185	269	*	269	34230	35257	+	inside	687	72	NearestLocation	1.93562	6.90102	8.82395	WBGene00017743	F23F1.2
X1016	chrII	50456	50870	415	*	415	51072	57607	+	upstream	-616	202	NearestLocation	1.473	1.80061	3.29224	WBGene00016020	sptl-1
X1017	chrII	66309	66589	281	*	281	69660	71279	+	upstream	-3351	3071	NearestLocation	1.65366	12.5207	14.8514	WBGene00001193	egl-26
X1018	chrII	76854	77166	313	*	313	71675	77460	-	inside	606	294	NearestLocation	1.97641	12.2173	14.5225	WBGene00016022	C23H3.9
X1019	chrII	77412	77956	545	*	545	71675	77460	-	overlapStart	48	48	NearestLocation	1.83348	5.55399	7.37847	WBGene00016022	C23H3.9
X1020	chrII	82875	83184	310	*	310	82914	83019	-	includeFeature	144	39	NearestLocation	1.90353	12.686	15.0256	WBGene00197273	C23H3.10
X1020	chrII	82875	83184	310	*	310	82914	83019	+	includeFeature	-39	39	NearestLocation	1.90353	12.686	15.0256	WBGene00199372	C23H3.11
X1021	chrII	92287	93179	893	*	893	88221	91519	-	upstream	-768	768	NearestLocation	1.60356	2.13978	3.66689	WBGene00016812	C50D2.9
X1022	chrII	101198	101568	371	*	371	99647	101061	+	downstream	1551	137	NearestLocation	1.40421	5.94639	7.79453	WBGene00044420	C50D2.10
X1023	chrII	146575	146857	283	*	283	146739	146962	-	overlapEnd	387	105	NearestLocation	1.75019	3.58907	5.25577	WBGene00198534	T25D3.7
X1024	chrII	157955	158305	351	*	351	154876	156043	-	upstream	-1912	1912	NearestLocation	1.67453	4.22901	5.94339	WBGene00020796	mrpl-28
X1025	chrII	158584	159226	643	*	643	161614	161771	+	upstream	-3030	2388	NearestLocation	1.76449	8.02931	10.0234	WBGene00220095	T25D3.8
X1026	chrII	162091	162337	247	*	247	162199	162345	+	overlapStart	-108	8	NearestLocation	1.55051	5.15762	6.95482	WBGene00196640	T25D3.5
X1027	chrII	163121	163412	292	*	292	162374	170628	+	inside	747	747	NearestLocation	1.62856	9.9077	12.0447	WBGene00001340	etr-1
X1028	chrII	167120	167397	278	*	278	162374	170628	+	inside	4746	3231	NearestLocation	1.45743	8.11007	10.1168	WBGene00001340	etr-1
X1029	chrII	168466	168978	513	*	513	171386	173779	-	downstream	5313	2408	NearestLocation	1.52697	4.63327	6.3854	WBGene00044428	T01D1.7
X1030	chrII	174565	174842	278	*	278	171386	173779	-	upstream	-786	786	NearestLocation	1.79235	6.40237	8.28589	WBGene00044428	T01D1.7
X1031	chrII	218483	218815	333	*	333	219675	219791	-	downstream	1308	860	NearestLocation	1.89901	13.5819	15.9922	WBGene00045088	F48A11.7
X1032	chrII	219289	219551	263	*	263	219675	219791	-	downstream	502	124	NearestLocation	1.55112	10.3073	12.4771	WBGene00045088	F48A11.7
X1033	chrII	220111	220466	356	*	356	217265	220642	-	inside	531	176	NearestLocation	1.18625	1.60891	3.07764	WBGene00018586	ubxn-3
X1034	chrII	251582	252226	645	*	645	240717	255182	-	inside	3600	2956	NearestLocation	1.52282	6.78067	8.69483	WBGene00004166	pqn-85
X1035	chrII	254946	255466	521	*	521	240717	255182	-	overlapStart	236	236	NearestLocation	1.36177	5.11975	6.9044	WBGene00004166	pqn-85
X1036	chrII	286583	286850	268	*	268	286625	288850	+	overlapStart	-42	42	NearestLocation	1.76052	3.43876	5.09301	WBGene00015186	misc-1
X1037	chrII	290864	291170	307	*	307	290582	291861	+	inside	282	282	NearestLocation	1.84068	7.74887	9.73168	WBGene00015184	djr-1.1
X1038	chrII	306216	306470	255	*	255	303924	305530	-	upstream	-686	686	NearestLocation	1.49394	9.29267	11.3883	WBGene00000645	col-69
X1039	chrII	323681	323980	300	*	300	321442	323098	-	upstream	-583	583	NearestLocation	1.64695	2.97651	4.58459	WBGene00019284	K01A2.10
X1040	chrII	399181	399428	248	*	248	396691	399423	-	overlapStart	242	5	NearestLocation	1.57254	10.1606	12.3222	WBGene00015408	C03H5.6
X1041	chrII	401829	402132	304	*	304	402660	404235	+	upstream	-831	528	NearestLocation	2.01573	17.972	20.7226	WBGene00015403	clec-10
X1042	chrII	410234	410493	260	*	260	410005	410056	+	downstream	229	178	NearestLocation	1.70037	8.33259	10.3617	WBGene00201105	C24H12.14
X1043	chrII	496405	496658	254	*	254	494577	498659	+	inside	1828	1828	NearestLocation	1.67893	4.06534	5.77725	WBGene00021075	W07E6.3
X1044	chrII	505446	505697	252	*	252	503229	506014	-	inside	568	317	NearestLocation	1.46843	7.66993	9.64646	WBGene00005324	T27A1.1
X1045	chrII	520657	521099	443	*	443	522594	525975	+	upstream	-1937	1495	NearestLocation	1.60868	5.7576	7.58622	WBGene00020837	slc-36.2
X1046	chrII	522995	523581	587	*	587	522998	523058	+	includeFeature	-3	3	NearestLocation	1.72675	3.75174	5.4193	WBGene00196035	T27A1.8
X1046	chrII	522995	523581	587	*	587	522998	523058	-	includeFeature	63	3	NearestLocation	1.72675	3.75174	5.4193	WBGene00198619	T27A1.9
X1047	chrII	578019	578274	256	*	256	574872	577732	-	upstream	-287	287	NearestLocation	1.65198	8.83285	10.8988	WBGene00021096	W08F4.7
X1048	chrII	578905	579355	451	*	451	578661	578714	+	downstream	244	191	NearestLocation	1.30137	3.11019	4.72659	WBGene00195943	W08F4.14
X1049	chrII	597460	597719	260	*	260	592575	594703	-	upstream	-2757	2757	NearestLocation	1.68809	10.0925	12.247	WBGene00021100	W08F4.11
X1050	chrII	600688	601311	624	*	624	595204	602120	-	inside	1432	809	NearestLocation	1.88391	11.0768	13.3065	WBGene00003599	nhl-3
X1051	chrII	618139	618414	276	*	276	614767	624543	-	inside	6404	3372	NearestLocation	1.61919	5.36111	7.16745	WBGene00020207	T04B8.5
X1052	chrII	619627	619903	277	*	277	614767	624543	-	inside	4916	4640	NearestLocation	1.9176	10.7665	12.9682	WBGene00020207	T04B8.5
X1053	chrII	620773	621065	293	*	293	614767	624543	-	inside	3770	3478	NearestLocation	1.71092	15.2167	17.7509	WBGene00020207	T04B8.5
X1054	chrII	649720	649994	275	*	275	641005	650367	-	inside	647	373	NearestLocation	1.93285	7.77962	9.77074	WBGene00019498	K07E8.7
X1055	chrII	700870	701188	319	*	319	700474	701137	-	overlapStart	267	51	NearestLocation	1.47598	8.43007	10.4575	WBGene00020181	T02H6.11
X1056	chrII	712785	713767	983	*	983	709381	723706	+	inside	3404	3404	NearestLocation	1.96019	8.16119	10.1654	WBGene00020171	T02H6.1
X1057	chrII	714735	715516	782	*	782	709381	723706	+	inside	5354	5354	NearestLocation	1.57129	2.59855	4.1684	WBGene00020171	T02H6.1
X1058	chrII	716653	716923	271	*	271	723788	732421	+	upstream	-7135	6865	NearestLocation	1.45138	7.54221	9.50449	WBGene00021456	Y39F10B.1
X1059	chrII	717497	717757	261	*	261	723788	732421	+	upstream	-6291	6031	NearestLocation	1.55346	1.77179	3.26003	WBGene00021456	Y39F10B.1
X1060	chrII	718204	718552	349	*	349	723788	732421	+	upstream	-5584	5236	NearestLocation	2.15586	13.3651	15.7592	WBGene00021456	Y39F10B.1
X1061	chrII	756546	756794	249	*	249	745462	750164	-	upstream	-6382	6382	NearestLocation	1.47451	3.91651	5.61106	WBGene00004926	snt-6
X1062	chrII	759882	760394	513	*	513	756194	765317	-	inside	5435	3688	NearestLocation	1.75995	3.41975	5.06984	WBGene00044418	C08G5.7
X1063	chrII	761624	762301	678	*	678	756194	765317	-	inside	3693	3016	NearestLocation	1.54917	1.66553	3.14301	WBGene00044418	C08G5.7
X1064	chrII	764321	764569	249	*	249	756194	765317	-	inside	996	748	NearestLocation	1.78442	5.79659	7.64116	WBGene00044418	C08G5.7
X1065	chrII	770026	770274	249	*	249	770553	772117	+	upstream	-527	279	NearestLocation	1.78034	11.7835	14.0606	WBGene00015618	C08G5.6
X1066	chrII	771844	772099	256	*	256	770553	772117	+	inside	1291	18	NearestLocation	1.69937	4.2937	6.01696	WBGene00015618	C08G5.6
X1067	chrII	776469	776736	268	*	268	775367	776715	+	overlapEnd	1102	21	NearestLocation	1.68686	6.79395	8.71318	WBGene00021452	Y39F10A.1
X1068	chrII	847871	848314	444	*	444	846867	848602	-	inside	731	288	NearestLocation	1.68332	11.2959	13.5368	WBGene00017874	acdh-9
X1069	chrII	874066	874326	261	*	261	873652	873780	+	downstream	414	286	NearestLocation	1.61506	9.81555	11.9495	WBGene00220060	T07D3.12
X1070	chrII	881830	882119	290	*	290	880522	883994	+	inside	1308	1308	NearestLocation	1.86583	12.4959	14.8227	WBGene00020309	T07D3.6
X1071	chrII	899753	900037	285	*	285	898044	900930	-	inside	1177	893	NearestLocation	1.70141	11.6498	13.9146	WBGene00020311	T07D3.9
X1072	chrII	1088091	1088532	442	*	442	1088444	1088516	-	includeFeature	425	16	NearestLocation	1.64066	2.7994	4.39668	WBGene00023316
X1073	chrII	1135154	1135430	277	*	277	1132302	1134152	-	upstream	-1002	1002	NearestLocation	1.67214	12.1251	14.4247	WBGene00021104	W09B6.4
X1074	chrII	1136652	1136998	347	*	347	1136801	1152705	+	overlapStart	-149	149	NearestLocation	2.00333	14.587	17.0722	WBGene00004076	pod-2
X1075	chrII	1138583	1138851	269	*	269	1136801	1152705	+	inside	1782	1782	NearestLocation	1.67318	8.10818	10.1222	WBGene00004076	pod-2
X1076	chrII	1161226	1161504	279	*	279	1163575	1165486	+	upstream	-2349	2071	NearestLocation	1.90399	10.6285	12.8231	WBGene00020740	T23F4.2
X1077	chrII	1201586	1201912	327	*	327	1197374	1230780	+	inside	4212	4212	NearestLocation	2.0541	13.6732	16.0945	WBGene00018734	F53A10.2
X1078	chrII	1224299	1224881	583	*	583	1235860	1235967	+	upstream	-11561	10979	NearestLocation	1.50269	6.25523	8.12827	WBGene00202164	F47F6.14
X1079	chrII	1234172	1234777	606	*	606	1235860	1235967	+	upstream	-1688	1083	NearestLocation	1.49596	7.21537	9.15909	WBGene00202164	F47F6.14
X1080	chrII	1241185	1241551	367	*	367	1242097	1242171	+	upstream	-912	546	NearestLocation	1.3251	4.12116	5.83237	WBGene00199388	F47F6.11
X1081	chrII	1307234	1307805	572	*	572	1302497	1306136	-	upstream	-1098	1098	NearestLocation	1.37359	3.83172	5.51177	WBGene00021973	emc-2
X1082	chrII	1308768	1309168	401	*	401	1306240	1310133	-	inside	1365	965	NearestLocation	1.57859	7.39107	9.34539	WBGene00000112	alh-6
X1083	chrII	1310145	1310712	568	*	568	1310535	1320438	+	overlapStart	-390	177	NearestLocation	1.63467	8.37233	10.4015	WBGene00018974	fcho-1
X1084	chrII	1333961	1334240	280	*	280	1334132	1334203	+	includeFeature	-171	37	NearestLocation	1.58212	8.23417	10.2475	WBGene00023298
X1085	chrII	1337006	1337617	612	*	612	1335738	1335809	+	downstream	1268	1197	NearestLocation	1.52071	6.76598	8.67585	WBGene00023299
X1086	chrII	1374796	1375046	251	*	251	1369046	1374985	-	overlapStart	189	61	NearestLocation	1.6138	6.18584	8.0603	WBGene00018819	rog-1
X1087	chrII	1402863	1403154	292	*	292	1403321	1409118	+	upstream	-458	167	NearestLocation	1.90642	11.7985	14.0735	WBGene00021784	cogc-4
X1088	chrII	1403535	1403816	282	*	282	1403321	1409118	+	inside	214	214	NearestLocation	1.74725	10.8813	13.0923	WBGene00021784	cogc-4
X1089	chrII	1495619	1495886	268	*	268	1489930	1500330	-	inside	4711	4444	NearestLocation	1.7578	5.29018	7.09568	WBGene00019209	emc-1
X1090	chrII	1501950	1502249	300	*	300	1489930	1500330	-	upstream	-1620	1620	NearestLocation	1.62266	10.3806	12.5526	WBGene00019209	emc-1
X1091	chrII	1503960	1504327	368	*	368	1504566	1509830	+	upstream	-606	239	NearestLocation	2.04052	21.7678	24.829	WBGene00019207	fgt-1
X1092	chrII	1505052	1505644	593	*	593	1504566	1509830	+	inside	486	486	NearestLocation	1.53859	7.59048	9.56343	WBGene00019207	fgt-1
X1093	chrII	1506568	1506833	266	*	266	1504566	1509830	+	inside	2002	2002	NearestLocation	1.7539	9.18657	11.2787	WBGene00019207	fgt-1
X1094	chrII	1508482	1508951	470	*	470	1509287	1509358	+	upstream	-805	336	NearestLocation	1.53934	4.71838	6.46389	WBGene00220177	Y51H7BM.2
X1095	chrII	1523670	1524215	546	*	546	1523565	1525598	-	inside	1928	105	NearestLocation	1.50613	4.92132	6.69367	WBGene00021778	Y51H7BR.7
X1096	chrII	2195444	2195728	285	*	285	2192364	2194114	-	upstream	-1330	1330	NearestLocation	1.71047	3.95403	5.64683	WBGene00016342	C33C12.10
X1097	chrII	2231761	2232287	527	*	527	2225819	2232470	-	inside	709	183	NearestLocation	2.00467	8.03657	10.0412	WBGene00018785	F54A3.6
X1098	chrII	2233514	2233766	253	*	253	2233540	2243533	+	overlapStart	-26	26	NearestLocation	1.92968	5.3899	7.20577	WBGene00018782	cct-3
X1099	chrII	2412077	2412344	268	*	268	2409643	2412741	-	inside	664	397	NearestLocation	1.67504	5.93206	7.78171	WBGene00018353	fbxa-182
X1100	chrII	2418820	2419082	263	*	263	2418448	2419025	+	overlapEnd	372	57	NearestLocation	1.52771	4.3345	6.0654	WBGene00044362	F42G2.7
X1101	chrII	2434924	2435420	497	*	497	2426372	2429944	-	upstream	-4980	4980	NearestLocation	1.83641	6.30355	8.16535	WBGene00018355	ceh-86
X1102	chrII	2436013	2436512	500	*	500	2442121	2442170	-	downstream	6157	5609	NearestLocation	1.77734	6.60055	8.48199	WBGene00201773	F42G2.10
X1103	chrII	2444881	2445463	583	*	583	2443292	2451140	+	inside	1589	1589	NearestLocation	1.41854	4.49544	6.23213	WBGene00006882	vab-19
X1104	chrII	2446232	2446584	353	*	353	2443292	2451140	+	inside	2940	2940	NearestLocation	1.2864	1.95615	3.46521	WBGene00006882	vab-19
X1105	chrII	2452978	2453530	553	*	553	2452838	2452936	+	downstream	140	42	NearestLocation	1.45456	6.62848	8.5297	WBGene00003300	mir-72
X1106	chrII	2454743	2455003	261	*	261	2452838	2452936	+	downstream	1905	1807	NearestLocation	1.53632	6.24469	8.12635	WBGene00003300	mir-72
X1107	chrII	2455454	2455701	248	*	248	2452838	2452936	+	downstream	2616	2518	NearestLocation	1.44762	5.91116	7.76339	WBGene00003300	mir-72
X1108	chrII	2647906	2648445	540	*	540	2646328	2646843	-	upstream	-1063	1063	NearestLocation	1.76794	3.45692	5.11348	WBGene00017710	F22E5.12
X1109	chrII	2707222	2708035	814	*	814	2705921	2707982	-	overlapStart	760	53	NearestLocation	2.29346	14.6806	17.2021	WBGene00021654	Y47G7B.2
X1110	chrII	2708302	2709227	926	*	926	2705921	2707982	-	upstream	-320	320	NearestLocation	1.61504	2.24487	3.77561	WBGene00021654	Y47G7B.2
X1111	chrII	2728824	2729119	296	*	296	2717522	2725541	-	upstream	-3283	3283	NearestLocation	1.46739	7.00222	8.92586	WBGene00020230	nep-2
X1112	chrII	2734890	2735486	597	*	597	2731319	2735250	-	overlapStart	360	236	NearestLocation	1.53556	8.86975	10.9348	WBGene00020231	T05A8.5
X1113	chrII	2747760	2748161	402	*	402	2747393	2747728	-	upstream	-32	32	NearestLocation	1.65544	4.37097	6.10373	WBGene00017915	F29A7.5
X1114	chrII	2786913	2787249	337	*	337	2783102	2787089	-	overlapStart	176	160	NearestLocation	1.49721	9.33618	11.4321	WBGene00017255	F08D12.12
X1115	chrII	2787917	2788184	268	*	268	2787481	2793305	+	inside	436	436	NearestLocation	1.38968	5.9574	7.80909	WBGene00017245	srpa-72
X1116	chrII	2794372	2794632	261	*	261	2794938	2800600	-	downstream	6228	306	NearestLocation	1.79848	11.6851	13.9542	WBGene00003709	nhr-119
X1117	chrII	2795135	2795456	322	*	322	2794938	2800600	-	inside	5465	197	NearestLocation	1.60994	10.1771	12.3341	WBGene00003709	nhr-119
X1118	chrII	2801317	2802131	815	*	815	2794938	2800600	-	upstream	-717	717	NearestLocation	1.66497	14.7769	17.2823	WBGene00003709	nhr-119
X1119	chrII	2802482	2802732	251	*	251	2794938	2800600	-	upstream	-1882	1882	NearestLocation	1.62071	8.43137	10.4684	WBGene00003709	nhr-119
X1120	chrII	2803258	2803526	269	*	269	2794938	2800600	-	upstream	-2658	2658	NearestLocation	1.74266	14.2355	16.6951	WBGene00003709	nhr-119
X1121	chrII	2805127	2805386	260	*	260	2808167	2812867	+	upstream	-3040	2781	NearestLocation	1.62656	12.424	14.7481	WBGene00019691	K12H6.12
X1122	chrII	2830620	2831008	389	*	389	2828598	2831233	-	inside	613	225	NearestLocation	1.63218	6.17838	8.04121	WBGene00019686	K12H6.6
X1123	chrII	2832563	2832845	283	*	283	2828598	2831233	-	upstream	-1330	1330	NearestLocation	1.72379	14.3345	16.8021	WBGene00019686	K12H6.6
X1124	chrII	2834479	2834894	416	*	416	2834953	2836628	-	downstream	2149	59	NearestLocation	1.66196	3.83808	5.52344	WBGene00019687	K12H6.7
X1125	chrII	2860253	2860506	254	*	254	2860342	2860423	+	includeFeature	-89	83	NearestLocation	1.74715	14.2554	16.7128	WBGene00023203	Y110A2AL.t1
X1126	chrII	2888752	2889009	258	*	258	2886378	2889016	-	inside	264	7	NearestLocation	1.54272	6.20762	8.08485	WBGene00022448	pinn-1
X1127	chrII	2917138	2917416	279	*	279	2913711	2919314	-	inside	2176	1898	NearestLocation	1.62597	8.83062	10.8979	WBGene00022453	Y110A2AR.3
X1128	chrII	2918779	2919091	313	*	313	2913711	2919314	-	inside	535	223	NearestLocation	1.56622	8.35746	10.3843	WBGene00022453	Y110A2AR.3
X1129	chrII	2920130	2921116	987	*	987	2919715	2920846	+	overlapEnd	415	270	NearestLocation	1.47462	9.35573	11.4608	WBGene00022452	Y110A2AR.1
X1130	chrII	2921879	2922209	331	*	331	2923917	2926951	+	upstream	-2038	1708	NearestLocation	1.68117	14.584	17.0715	WBGene00022712	ZK355.2
X1131	chrII	2922834	2923129	296	*	296	2923917	2926951	+	upstream	-1083	788	NearestLocation	1.78027	17.5733	20.2956	WBGene00022712	ZK355.2
X1132	chrII	2925108	2925634	527	*	527	2923917	2926951	+	inside	1191	1191	NearestLocation	1.38012	4.52333	6.26471	WBGene00022712	ZK355.2
X1133	chrII	2974117	2974415	299	*	299	2976639	2986981	+	upstream	-2522	2224	NearestLocation	1.66741	13.8047	16.2294	WBGene00003678	nhr-88
X1134	chrII	2974700	2975233	534	*	534	2976639	2986981	+	upstream	-1939	1406	NearestLocation	1.48406	2.05287	3.57478	WBGene00003678	nhr-88
X1135	chrII	2976502	2976981	480	*	480	2976639	2986981	+	overlapStart	-137	137	NearestLocation	1.88732	11.8816	14.1588	WBGene00003678	nhr-88
X1136	chrII	2977937	2978296	360	*	360	2978039	2978092	-	includeFeature	155	102	NearestLocation	1.57018	2.89525	4.49818	WBGene00196762	K08A2.11
X1137	chrII	2979548	2979840	293	*	293	2979389	2979442	-	upstream	-106	106	NearestLocation	1.61442	10.6048	12.7967	WBGene00202213	K08A2.16
X1138	chrII	2983122	2983381	260	*	260	2983671	2983729	-	downstream	607	290	NearestLocation	1.59866	9.48186	11.5933	WBGene00200139	K08A2.15
X1139	chrII	2988371	2988648	278	*	278	2988307	2991293	+	inside	64	64	NearestLocation	1.48612	7.91968	9.91208	WBGene00019513	K08A2.4
X1140	chrII	3014793	3015085	293	*	293	3014835	3015961	+	overlapStart	-42	42	NearestLocation	1.87331	17.7025	20.4315	WBGene00016572	C41H7.2
X1141	chrII	3016459	3016977	519	*	519	3016068	3017471	+	inside	391	391	NearestLocation	1.41579	3.02879	4.63681	WBGene00016571	C41H7.1
X1142	chrII	3031077	3031336	260	*	260	3032780	3036117	+	upstream	-1703	1444	NearestLocation	2.19166	16.7798	19.4423	WBGene00015197	B0454.6
X1143	chrII	3079049	3079333	285	*	285	3078796	3087681	+	inside	253	253	NearestLocation	1.83205	14.1565	16.6095	WBGene00021292	copb-1
X1144	chrII	3127996	3128271	276	*	276	3129179	3131376	+	upstream	-1183	908	NearestLocation	1.75334	5.57287	7.39656	WBGene00020407	chil-24
X1145	chrII	3219291	3219540	250	*	250	3219687	3220774	-	downstream	1483	147	NearestLocation	1.6466	7.68004	9.65978	WBGene00194717	ZC239.22
X1146	chrII	3267200	3267471	272	*	272	3267663	3271502	+	upstream	-463	192	NearestLocation	2.06666	12.8998	15.2572	WBGene00195073	F02E11.7
X1147	chrII	3481910	3482436	527	*	527	3482436	3490139	+	overlapStart	-526	0	NearestLocation	1.56845	6.82498	8.7319	WBGene00004896	smu-2
X1148	chrII	3502091	3502566	476	*	476	3500073	3502449	-	overlapStart	358	117	NearestLocation	1.46772	5.43213	7.25055	WBGene00000647	col-71
X1149	chrII	3518490	3518758	269	*	269	3519086	3519157	-	downstream	667	328	NearestLocation	1.72767	11.882	14.1638	WBGene00023162	W09G10.t3
X1150	chrII	3519715	3519964	250	*	250	3519494	3520421	+	inside	221	221	NearestLocation	1.49616	9.31678	11.4147	WBGene00021117	clec-126
X1151	chrII	3527915	3528497	583	*	583	3525150	3528516	-	inside	601	19	NearestLocation	1.73561	5.20043	6.98507	WBGene00021116	ncs-6
X1152	chrII	3547378	3547624	247	*	247	3532526	3546431	-	upstream	-947	947	NearestLocation	1.49475	6.50517	8.40309	WBGene00000162	apd-3
X1153	chrII	3551896	3552201	306	*	306	3550651	3553450	+	inside	1245	1245	NearestLocation	1.91634	5.10016	6.88451	WBGene00021148	W10G11.19
X1154	chrII	3552882	3553400	519	*	519	3553780	3554618	+	upstream	-898	380	NearestLocation	1.76003	3.7109	5.39068	WBGene00021149	dnc-3
X1155	chrII	3683166	3683424	259	*	259	3683177	3684996	+	overlapStart	-11	11	NearestLocation	1.49797	6.75501	8.66914	WBGene00017583	F19B10.1
X1156	chrII	3684182	3684506	325	*	325	3683177	3684996	+	inside	1005	490	NearestLocation	2.06708	16.2483	18.8632	WBGene00017583	F19B10.1
X1157	chrII	3810081	3810411	331	*	331	3807096	3808223	-	upstream	-1858	1858	NearestLocation	1.65116	2.48713	4.05153	WBGene00018806	F54D10.5
X1158	chrII	3816446	3816876	431	*	431	3816961	3818238	+	upstream	-515	85	NearestLocation	1.53827	6.27812	8.13917	WBGene00018803	fbxa-24
X1159	chrII	3898127	3898504	378	*	378	3898142	3899709	+	overlapStart	-15	15	NearestLocation	1.42753	8.43658	10.4654	WBGene00018750	F53C3.6
X1160	chrII	3927821	3928073	253	*	253	3919794	3927982	-	overlapStart	161	91	NearestLocation	1.46376	6.69284	8.60269	WBGene00018756	F53C3.13
X1161	chrII	3929979	3930306	328	*	328	3919794	3927982	-	upstream	-1997	1997	NearestLocation	1.58468	3.67551	5.34631	WBGene00018756	F53C3.13
X1162	chrII	3930558	3931134	577	*	577	3919794	3927982	-	upstream	-2576	2576	NearestLocation	1.56633	6.39878	8.28611	WBGene00018756	F53C3.13
X1163	chrII	3951929	3952307	379	*	379	3950377	3972138	+	inside	1552	1552	NearestLocation	1.66254	3.00647	4.62329	WBGene00004751	sea-2
X1164	chrII	3953454	3953926	473	*	473	3950377	3972138	+	inside	3077	3077	NearestLocation	1.4406	1.47673	2.92862	WBGene00004751	sea-2
X1165	chrII	3954632	3954973	342	*	342	3957203	3957372	+	upstream	-2571	2230	NearestLocation	1.60631	10.2363	12.3931	WBGene00220021	K10G6.10
X1166	chrII	4012423	4012680	258	*	258	4011457	4011509	-	upstream	-914	914	NearestLocation	1.56745	6.01466	7.87303	WBGene00199767	Y14H12A.3
X1167	chrII	4015169	4015784	616	*	616	4016827	4018701	-	downstream	3532	1043	NearestLocation	1.50366	5.11093	6.89917	WBGene00019486	K07D4.6
X1168	chrII	4049738	4050003	266	*	266	4048525	4049129	-	upstream	-609	609	NearestLocation	1.81506	15.6822	18.253	WBGene00023318	K07D4.1
X1169	chrII	4090451	4090753	303	*	303	4091837	4094348	+	upstream	-1386	1084	NearestLocation	1.65326	13.4587	15.8577	WBGene00020007	R11F4.1
X1170	chrII	4107274	4107621	348	*	348	4107350	4107450	+	includeFeature	-76	76	NearestLocation	1.31633	3.98712	5.68025	WBGene00220063	T08H4.9
X1171	chrII	4109144	4109408	265	*	265	4107350	4107450	+	downstream	1794	1694	NearestLocation	1.9918	6.65009	8.54948	WBGene00220063	T08H4.9
X1172	chrII	4185778	4186050	273	*	273	4186666	4208499	+	upstream	-888	616	NearestLocation	1.86104	8.63908	10.6895	WBGene00006495	cpna-1
X1173	chrII	4191921	4192173	253	*	253	4188981	4194458	-	inside	2537	2285	NearestLocation	1.58185	7.60422	9.58553	WBGene00017947	mth-2
X1174	chrII	4194633	4194919	287	*	287	4188981	4194458	-	upstream	-175	175	NearestLocation	1.87852	10.1825	12.3416	WBGene00017947	mth-2
X1175	chrII	4207603	4207859	257	*	257	4209738	4210066	+	upstream	-2135	1879	NearestLocation	1.98423	13.8867	16.3229	WBGene00017949	F31D5.6
X1176	chrII	4209122	4209396	275	*	275	4209738	4210066	+	upstream	-616	342	NearestLocation	1.77988	11.8005	14.076	WBGene00017949	F31D5.6
X1177	chrII	4289900	4290259	360	*	360	4282279	4288210	-	upstream	-1690	1690	NearestLocation	1.98942	5.74432	7.58522	WBGene00015301	C01F1.6
X1178	chrII	4291756	4292060	305	*	305	4295101	4299211	+	upstream	-3345	3041	NearestLocation	1.60692	2.4362	3.99255	WBGene00015298	C01F1.3
X1179	chrII	4292453	4292795	343	*	343	4295101	4299211	+	upstream	-2648	2306	NearestLocation	1.75886	3.36171	5.01077	WBGene00015298	C01F1.3
X1180	chrII	4296878	4297240	363	*	363	4295342	4295596	-	upstream	-1282	1282	NearestLocation	1.58132	2.05777	3.5804	WBGene00202373	C01F1.8
X1181	chrII	4299371	4300323	953	*	953	4299658	4301103	+	overlapStart	-287	287	NearestLocation	1.55007	3.16093	4.78296	WBGene00015297	sco-1
X1182	chrII	4372947	4373242	296	*	296	4369625	4372568	-	upstream	-379	379	NearestLocation	1.40336	6.63106	8.52362	WBGene00015116	B0286.3
X1183	chrII	4373914	4374207	294	*	294	4369625	4372568	-	upstream	-1346	1346	NearestLocation	1.7447	11.6256	13.8902	WBGene00015116	B0286.3
X1184	chrII	4375168	4375428	261	*	261	4372740	4376742	-	inside	1574	1314	NearestLocation	1.75855	10.0639	12.2144	WBGene00003825	ntl-2
X1185	chrII	4419583	4420009	427	*	427	4420255	4422314	+	upstream	-672	246	NearestLocation	1.56549	1.90975	3.4135	WBGene00044063	tag-231
X1186	chrII	4458694	4458941	248	*	248	4458259	4460402	-	inside	1708	435	NearestLocation	1.46016	4.39341	6.12876	WBGene00020461	T12C9.7
X1187	chrII	4468127	4468418	292	*	292	4468170	4471037	+	overlapStart	-43	43	NearestLocation	1.64057	7.99943	9.9977	WBGene00021057	W06B4.2
X1188	chrII	4470297	4470953	657	*	657	4471401	4473745	+	upstream	-1104	448	NearestLocation	1.62345	3.16363	4.78551	WBGene00021056	W06B4.1
X1189	chrII	4495146	4495561	416	*	416	4492452	4492566	-	upstream	-2580	2580	NearestLocation	1.93434	11.8538	14.1447	WBGene00196553	T05C1.7
X1190	chrII	4597640	4597991	352	*	352	4590953	4601356	-	inside	3716	3365	NearestLocation	1.95807	8.96586	11.0399	WBGene00019747	ipla-1
X1191	chrII	4600314	4600646	333	*	333	4590953	4601356	-	inside	1042	710	NearestLocation	1.70242	3.07271	4.6947	WBGene00019747	ipla-1
X1192	chrII	4602420	4602737	318	*	318	4601216	4602633	-	overlapStart	213	104	NearestLocation	2.04484	11.1693	13.3975	WBGene00018046	F35D11.5
X1193	chrII	4603853	4604124	272	*	272	4603198	4604163	+	inside	655	39	NearestLocation	1.91459	9.44424	11.5526	WBGene00018045	F35D11.4
X1194	chrII	4692864	4693143	280	*	280	4693445	4696408	+	upstream	-581	302	NearestLocation	1.85759	5.23617	7.03964	WBGene00017369	F10G7.5
X1195	chrII	4706739	4707164	426	*	426	4706821	4710169	+	overlapStart	-82	82	NearestLocation	1.31383	4.78659	6.54703	WBGene00006626	tsn-1
X1196	chrII	4725937	4726296	360	*	360	4713673	4726262	-	overlapStart	325	34	NearestLocation	1.49966	1.73751	3.22133	WBGene00017373	F10G7.10
X1197	chrII	4745993	4746269	277	*	277	4749968	4751823	+	upstream	-3975	3699	NearestLocation	1.71035	10.1202	12.2781	WBGene00018268	F41C3.2
X1198	chrII	4771118	4771406	289	*	289	4770538	4771381	-	overlapStart	263	25	NearestLocation	1.90879	14.0674	16.5124	WBGene00017841	F26G1.5
X1199	chrII	4802702	4802949	248	*	248	4807317	4807466	+	upstream	-4615	4368	NearestLocation	1.56311	1.79559	3.28723	WBGene00195414	C33F10.16
X1200	chrII	4804850	4805334	485	*	485	4807317	4807466	+	upstream	-2467	1983	NearestLocation	1.55184	2.051	3.56928	WBGene00195414	C33F10.16
X1201	chrII	4855168	4855655	488	*	488	4857923	4859181	+	upstream	-2755	2268	NearestLocation	1.45277	1.5243	2.98541	WBGene00017385	F11G11.5
X1202	chrII	4856600	4857354	755	*	755	4857923	4859181	+	upstream	-1323	569	NearestLocation	1.61911	2.74933	4.33318	WBGene00017385	F11G11.5
X1203	chrII	4857999	4858296	298	*	298	4857923	4859181	+	inside	76	76	NearestLocation	1.47907	7.16104	9.1059	WBGene00017385	F11G11.5
X1204	chrII	4872293	4872790	498	*	498	4872098	4873127	-	inside	834	195	NearestLocation	1.33669	3.80192	5.46093	WBGene00000649	col-73
X1205	chrII	4889374	4889670	297	*	297	4889437	4891469	+	overlapStart	-63	63	NearestLocation	1.84952	4.6113	6.35903	WBGene00019890	R05F9.6
X1206	chrII	4902531	4903220	690	*	690	4899859	4902099	-	upstream	-432	432	NearestLocation	1.61983	8.20961	10.223	WBGene00019892	R05F9.9
X1207	chrII	4908738	4909019	282	*	282	4907228	4907363	-	upstream	-1375	1375	NearestLocation	1.87986	13.7317	16.1499	WBGene00202479	R05F9.15
X1208	chrII	4910683	4910946	264	*	264	4911760	4914215	-	downstream	3532	814	NearestLocation	2.06344	11.4957	13.7519	WBGene00019894	R05F9.11
X1209	chrII	4942469	4942856	388	*	388	4942395	4942519	-	overlapStart	50	50	NearestLocation	1.44755	5.44745	7.24814	WBGene00044937	ZK546.18
X1210	chrII	4954760	4955140	381	*	381	4954500	4955427	-	inside	667	260	NearestLocation	1.49319	1.47654	2.93129	WBGene00003949	pbs-3
X1211	chrII	4992809	4993160	352	*	352	4991587	4993077	-	overlapStart	268	83	NearestLocation	1.58693	2.26663	3.80446	WBGene00194986	T27F7.4
X1212	chrII	5023610	5023882	273	*	273	5022764	5029982	+	inside	846	846	NearestLocation	1.87061	11.37	13.6134	WBGene00003822	nsy-1
X1213	chrII	5055891	5056188	298	*	298	5055616	5056214	+	inside	275	26	NearestLocation	1.47852	2.11747	3.63723	WBGene00004434	rpl-22
X1214	chrII	5181512	5182023	512	*	512	5181774	5181980	+	includeFeature	-262	43	NearestLocation	1.64033	8.31339	10.3198	WBGene00202400	C27D6.14
X1215	chrII	5182711	5183104	394	*	394	5181774	5181980	+	downstream	937	731	NearestLocation	1.49346	2.3718	3.92014	WBGene00202400	C27D6.14
X1216	chrII	5202106	5202653	548	*	548	5203320	5209797	+	upstream	-1214	667	NearestLocation	1.94958	8.36704	10.3826	WBGene00016415	ampd-1
X1217	chrII	5271336	5271583	248	*	248	5270366	5271824	-	inside	488	241	NearestLocation	1.5976	5.77025	7.61395	WBGene00016911	drn-1
X1218	chrII	5276748	5277005	258	*	258	5273558	5273647	-	upstream	-3101	3101	NearestLocation	1.55379	2.36339	3.91072	WBGene00200325	C54A12.8
X1219	chrII	5283408	5283738	331	*	331	5278137	5282525	-	upstream	-883	883	NearestLocation	1.87495	4.74911	6.501	WBGene00022781	pmt-1
X1220	chrII	5285787	5286059	273	*	273	5285329	5288931	+	inside	458	458	NearestLocation	2.16373	9.09477	11.1759	WBGene00001806	gur-5
X1221	chrII	5294288	5294546	259	*	259	5293817	5295628	+	inside	471	471	NearestLocation	1.76353	7.73628	9.72006	WBGene00022780	ZK622.1
X1222	chrII	5312053	5312353	301	*	301	5312120	5319083	+	overlapStart	-67	67	NearestLocation	2.00775	11.8017	14.0777	WBGene00001538	gcy-12
X1223	chrII	5326183	5326635	453	*	453	5323007	5340818	+	inside	3176	3176	NearestLocation	1.44765	1.36997	2.81081	WBGene00006923	vhp-1
X1224	chrII	5327016	5327625	610	*	610	5329561	5331221	-	downstream	4205	1936	NearestLocation	1.53142	1.74249	3.22883	WBGene00219672	anr-54
X1225	chrII	5327916	5328417	502	*	502	5329561	5331221	-	downstream	3305	1144	NearestLocation	1.71538	3.42784	5.07181	WBGene00219672	anr-54
X1226	chrII	5328923	5329863	941	*	941	5329561	5331221	-	overlapEnd	2298	302	NearestLocation	1.56515	2.06437	3.58103	WBGene00219672	anr-54
X1227	chrII	5336187	5336441	255	*	255	5335930	5335986	+	downstream	257	201	NearestLocation	1.4294	1.93472	3.44013	WBGene00219881	F08B1.8
X1228	chrII	5337814	5338207	394	*	394	5335930	5335986	+	downstream	1884	1828	NearestLocation	1.68083	3.77587	5.4519	WBGene00219881	F08B1.8
X1229	chrII	5339799	5340213	415	*	415	5335930	5335986	+	downstream	3869	3813	NearestLocation	1.57458	1.91235	3.41779	WBGene00219881	F08B1.8
X1230	chrII	5378889	5379511	623	*	623	5379662	5379881	-	downstream	992	151	NearestLocation	1.66324	10.1226	12.2825	WBGene00201570	F09E5.22
X1231	chrII	5505555	5505851	297	*	297	5506092	5509056	+	upstream	-537	241	NearestLocation	1.91229	6.07771	7.93847	WBGene00022672	ZK177.4
X1232	chrII	5571493	5572072	580	*	580	5571302	5571965	+	overlapEnd	191	107	NearestLocation	2.0624	7.27649	9.20552	WBGene00015896	C17C3.15
X1233	chrII	5578116	5578363	248	*	248	5578132	5578269	-	includeFeature	153	16	NearestLocation	1.52977	6.7327	8.64584	WBGene00198338	T25E4.4
X1234	chrII	5662481	5662751	271	*	271	5661167	5665243	+	inside	1314	1314	NearestLocation	1.53058	7.57581	9.54766	WBGene00016115	mdt-26
X1235	chrII	5663125	5663384	260	*	260	5661167	5665243	+	inside	1958	1859	NearestLocation	1.61906	9.0057	11.0763	WBGene00016115	mdt-26
X1236	chrII	5689046	5689292	247	*	247	5684479	5689030	-	upstream	-16	16	NearestLocation	1.52361	9.93931	12.0808	WBGene00016120	C25H3.11
X1237	chrII	5691153	5691638	486	*	486	5690134	5691355	-	overlapStart	202	202	NearestLocation	1.45116	8.21796	10.2177	WBGene00016118	C25H3.9
X1238	chrII	5699127	5699657	531	*	531	5699600	5701408	+	overlapStart	-473	57	NearestLocation	1.78926	3.8395	5.52277	WBGene00016111	C25H3.1
X1239	chrII	5701462	5701717	256	*	256	5701662	5701726	+	overlapStart	-200	9	NearestLocation	1.58253	9.10914	11.1908	WBGene00044704	C18A3.12
X1240	chrII	5711626	5711873	248	*	248	5712350	5714823	-	downstream	3197	477	NearestLocation	1.60881	2.10394	3.63241	WBGene00015943	tiar-1
X1241	chrII	5751968	5752594	627	*	627	5750190	5754141	+	inside	1778	1547	NearestLocation	1.71579	3.10142	4.72021	WBGene00002054	ifb-2
X1242	chrII	5818581	5818829	249	*	249	5818598	5818831	+	overlapStart	-17	2	NearestLocation	1.86534	5.44313	7.26366	WBGene00022875	ZK1248.4
X1243	chrII	5823260	5823529	270	*	270	5820712	5824085	+	inside	2548	556	NearestLocation	1.72333	10.1887	12.3475	WBGene00001224	ehs-1
X1244	chrII	5827265	5827585	321	*	321	5823816	5827443	-	overlapStart	178	142	NearestLocation	1.80859	8.56729	10.6043	WBGene00022880	tbc-2
X1245	chrII	5845207	5845460	254	*	254	5845254	5845541	-	overlapEnd	334	47	NearestLocation	1.90819	8.45847	10.4962	WBGene00022884	ZK1248.17
X1246	chrII	5882066	5882334	269	*	269	5880138	5880284	-	upstream	-1782	1782	NearestLocation	1.63587	6.99049	8.92152	WBGene00198639	F55C12.13
X1247	chrII	5888156	5888508	353	*	353	5890124	5890263	+	upstream	-1968	1616	NearestLocation	1.95905	6.3591	8.23803	WBGene00201294	F55C12.15
X1248	chrII	5890387	5890656	270	*	270	5890124	5890263	+	downstream	263	124	NearestLocation	1.6821	7.54112	9.51266	WBGene00201294	F55C12.15
X1249	chrII	5900094	5900360	267	*	267	5900229	5900328	+	includeFeature	-135	32	NearestLocation	1.5887	2.09611	3.62131	WBGene00199631	F59G1.13
X1250	chrII	5900631	5901093	463	*	463	5900229	5900328	+	downstream	402	303	NearestLocation	1.73808	4.74195	6.49609	WBGene00199631	F59G1.13
X1251	chrII	5901723	5902113	391	*	391	5901804	5902066	-	includeFeature	343	47	NearestLocation	1.37869	5.71896	7.54519	WBGene00198855	F59G1.12
X1252	chrII	5910470	5910763	294	*	294	5911324	5916911	+	upstream	-854	561	NearestLocation	1.97947	6.3733	8.2592	WBGene00019127	cgt-3
X1253	chrII	5914996	5915308	313	*	313	5917422	5918319	+	upstream	-2426	2114	NearestLocation	1.62693	10.3083	12.4772	WBGene00001486	frh-1
X1254	chrII	5936418	5937258	841	*	841	5936917	5936937	+	includeFeature	-499	321	NearestLocation	1.78506	10.5155	12.7001	WBGene00173618	21ur-12994
X1255	chrII	5942830	5943143	314	*	314	5942989	5943880	+	overlapStart	-159	154	NearestLocation	1.52928	1.683	3.16268	WBGene00017894	F28B12.1
X1256	chrII	5950655	5950945	291	*	291	5950185	5950318	+	downstream	470	337	NearestLocation	1.71936	9.6373	11.7557	WBGene00202395	B0034.17
X1257	chrII	6236311	6236619	309	*	309	6234133	6234255	+	downstream	2178	2056	NearestLocation	1.66353	2.55423	4.12606	WBGene00199512	T24H7.7
X1258	chrII	6251335	6251672	338	*	338	6251411	6253006	+	overlapStart	-76	76	NearestLocation	1.78782	16.376	19.0015	WBGene00004015	phb-2
X1259	chrII	6260708	6261248	541	*	541	6260990	6262524	+	overlapStart	-282	258	NearestLocation	1.54435	2.10526	3.62948	WBGene00017437	nmgp-1
X1260	chrII	6343366	6343774	409	*	409	6343088	6343234	+	downstream	278	132	NearestLocation	1.93393	16.899	19.5713	WBGene00200080	C32D5.18
X1261	chrII	6383558	6384265	708	*	708	6383645	6384691	+	overlapStart	-87	87	NearestLocation	1.66076	13.7377	16.161	WBGene00019061	F58F12.1
X1262	chrII	6410075	6410324	250	*	250	6407537	6410281	-	overlapStart	206	43	NearestLocation	1.69716	9.41283	11.5195	WBGene00020801	T25D10.4
X1263	chrII	6488982	6489246	265	*	265	6488829	6489761	-	inside	779	153	NearestLocation	1.43088	7.59767	9.56931	WBGene00004916	snr-3
X1264	chrII	6491035	6491309	275	*	275	6491936	6492164	+	upstream	-901	627	NearestLocation	1.65481	8.31975	10.3492	WBGene00195728	T28D9.13
X1265	chrII	6524290	6524557	268	*	268	6524503	6524523	-	includeFeature	233	34	NearestLocation	1.76044	13.6826	16.1045	WBGene00165924	21ur-14585
X1266	chrII	6563779	6564051	273	*	273	6563399	6563467	+	downstream	380	312	NearestLocation	1.64223	11.9332	14.2219	WBGene00198232	F18C5.14
X1267	chrII	6587891	6588170	280	*	280	6584421	6587587	-	upstream	-304	304	NearestLocation	1.65511	3.29453	4.93402	WBGene00016964	C56C10.7
X1268	chrII	6590368	6590847	480	*	480	6589290	6591086	+	inside	1078	239	NearestLocation	1.59523	2.73736	4.32121	WBGene00016961	vps-32.1
X1269	chrII	6613515	6613790	276	*	276	6613599	6613780	-	includeFeature	265	10	NearestLocation	1.55313	11.6804	13.9497	WBGene00195848	F54H5.7
X1270	chrII	6617776	6618042	267	*	267	6617800	6617918	+	includeFeature	-24	24	NearestLocation	1.91548	7.29515	9.24387	WBGene00201073	F54H5.9
X1271	chrII	6620804	6621064	261	*	261	6620511	6620645	-	upstream	-159	159	NearestLocation	1.62618	9.29056	11.3889	WBGene00201820	F54H5.11
X1272	chrII	6685051	6685312	262	*	262	6685533	6685681	+	upstream	-482	221	NearestLocation	1.50451	8.47559	10.5123	WBGene00197105	C18H9.9
X1273	chrII	6691533	6691837	305	*	305	6691986	6692079	+	upstream	-453	149	NearestLocation	1.99292	14.8148	17.3128	WBGene00219826	C18H9.12
X1274	chrII	6820371	6820632	262	*	262	6817750	6819328	-	upstream	-1043	1043	NearestLocation	1.57097	11.281	13.5218	WBGene00017956	F31E8.6
X1275	chrII	6828225	6828845	621	*	621	6828295	6828433	-	includeFeature	208	70	NearestLocation	1.43796	8.06241	10.0686	WBGene00199584	F31E8.16
X1276	chrII	6829758	6830021	264	*	264	6829681	6829968	+	overlapEnd	77	53	NearestLocation	1.44262	8.59272	10.6368	WBGene00201865	F31E8.21
X1277	chrII	6834660	6834962	303	*	303	6834745	6834957	-	includeFeature	297	5	NearestLocation	1.51278	10.4394	12.6149	WBGene00202026	C04A2.14
X1278	chrII	6843831	6844086	256	*	256	6843240	6843363	+	downstream	591	468	NearestLocation	1.45419	9.22701	11.3171	WBGene00219797	C04A2.16
X1279	chrII	6846709	6847105	397	*	397	6848060	6851527	+	upstream	-1351	955	NearestLocation	1.31417	4.5621	6.29238	WBGene00015410	tbc-6
X1280	chrII	6848434	6848786	353	*	353	6848060	6851527	+	inside	374	374	NearestLocation	1.5629	7.2102	9.13704	WBGene00015410	tbc-6
X1281	chrII	6890110	6890434	325	*	325	6888552	6890418	-	overlapStart	308	16	NearestLocation	1.93356	5.24865	7.04807	WBGene00016630	acer-1
X1282	chrII	6891193	6891570	378	*	378	6888552	6890418	-	upstream	-775	775	NearestLocation	1.68537	12.4754	14.8036	WBGene00016630	acer-1
X1283	chrII	6892053	6892871	819	*	819	6891714	6893635	-	inside	1582	339	NearestLocation	1.79198	4.02437	5.71342	WBGene00016632	C44B7.12
X1284	chrII	6927193	6927533	341	*	341	6927637	6927825	-	downstream	632	104	NearestLocation	1.73707	8.11818	10.1243	WBGene00219680	linc-35
X1285	chrII	6959953	6960210	258	*	258	6955406	6965687	-	inside	5734	4547	NearestLocation	1.60893	6.01178	7.86976	WBGene00006605	tra-2
X1286	chrII	6972806	6973200	395	*	395	6972687	6972790	+	downstream	119	16	NearestLocation	1.78348	13.7534	16.1854	WBGene00196089	C15F1.13
X1287	chrII	7047946	7048197	252	*	252	7046041	7050073	-	inside	2127	1876	NearestLocation	1.51183	5.69085	7.52727	WBGene00022855	tcer-1
X1288	chrII	7071963	7072385	423	*	423	7070186	7072415	-	inside	452	30	NearestLocation	1.63573	2.95387	4.56156	WBGene00002238	kars-1
X1289	chrII	7073737	7074363	627	*	627	7073796	7075551	+	overlapStart	-59	59	NearestLocation	2.22992	14.8789	17.4	WBGene00002183	kat-1
X1290	chrII	7074824	7075266	443	*	443	7075614	7077191	+	upstream	-790	348	NearestLocation	1.79877	6.40211	8.294	WBGene00020166	T02G5.7
X1291	chrII	7122753	7123214	462	*	462	7122260	7122279	-	upstream	-474	474	NearestLocation	1.31106	4.3167	6.04172	WBGene00195030	F10E7.12
X1292	chrII	7132335	7132866	532	*	532	7132643	7137217	+	overlapStart	-308	223	NearestLocation	1.51206	1.717	3.1974	WBGene00001597	gld-3
X1293	chrII	7239727	7239975	249	*	249	7238948	7242909	+	inside	779	779	NearestLocation	1.85424	4.6982	6.45804	WBGene00219686	linc-125
X1294	chrII	7252347	7252637	291	*	291	7252259	7255738	+	inside	88	88	NearestLocation	1.51004	9.23338	11.32	WBGene00017967	ada-2
X1295	chrII	7271933	7272233	301	*	301	7274732	7277223	+	upstream	-2799	2499	NearestLocation	1.90422	9.47438	11.5782	WBGene00016275	C30G12.3
X1296	chrII	7283603	7283886	284	*	284	7287417	7287813	-	downstream	4210	3531	NearestLocation	1.88281	4.69036	6.44193	WBGene00219655	linc-107
X1297	chrII	7284924	7285198	275	*	275	7287417	7287813	-	downstream	2889	2219	NearestLocation	1.78875	3.99624	5.70165	WBGene00219655	linc-107
X1298	chrII	7328526	7328789	264	*	264	7328736	7331324	-	overlapEnd	2798	53	NearestLocation	1.75925	9.40401	11.501	WBGene00017664	npax-1
X1299	chrII	7353109	7353372	264	*	264	7350119	7352636	-	upstream	-473	473	NearestLocation	1.49853	8.76447	10.8253	WBGene00002008	hsp-4
X1300	chrII	7368293	7368826	534	*	534	7366591	7368846	-	inside	553	20	NearestLocation	1.49479	5.01504	6.78839	WBGene00018394	F43E2.6
X1301	chrII	7411815	7412072	258	*	258	7411075	7412030	-	overlapStart	215	42	NearestLocation	1.85139	9.55212	11.6701	WBGene00019290	K02A2.5
X1302	chrII	7486671	7486927	257	*	257	7487529	7487625	+	upstream	-858	602	NearestLocation	1.9712	11.9396	14.2355	WBGene00201556	D1022.16
X1303	chrII	7607454	7607833	380	*	380	7608282	7610926	+	upstream	-828	449	NearestLocation	1.38825	2.5573	4.12578	WBGene00019939	lips-17
X1304	chrII	7614240	7614751	512	*	512	7610983	7613730	-	upstream	-510	510	NearestLocation	1.66281	4.96065	6.72498	WBGene00019943	R07G3.7
X1305	chrII	7615484	7615770	287	*	287	7615506	7615667	-	includeFeature	183	22	NearestLocation	1.58921	10.3341	12.5008	WBGene00200514	R07G3.14
X1306	chrII	7624226	7624548	323	*	323	7623578	7623816	-	upstream	-410	410	NearestLocation	1.73987	3.97023	5.67007	WBGene00195359	R07G3.10
X1307	chrII	7625184	7625432	249	*	249	7625262	7625401	-	includeFeature	217	31	NearestLocation	1.70174	10.4893	12.6676	WBGene00201675	R153.8
X1308	chrII	7634210	7634526	317	*	317	7635456	7635601	+	upstream	-1246	930	NearestLocation	1.87273	15.181	17.7136	WBGene00200555	R153.5
X1309	chrII	7635370	7635704	335	*	335	7635456	7635601	+	includeFeature	-86	86	NearestLocation	1.31576	4.71596	6.46487	WBGene00200555	R153.5
X1310	chrII	7636882	7637146	265	*	265	7635456	7635601	+	downstream	1426	1281	NearestLocation	1.7298	6.79532	8.71384	WBGene00200555	R153.5
X1311	chrII	7640161	7641022	862	*	862	7635456	7635601	+	downstream	4705	4560	NearestLocation	1.80519	10.9755	13.1897	WBGene00200555	R153.5
X1312	chrII	7641619	7641963	345	*	345	7635456	7635601	+	downstream	6163	6018	NearestLocation	1.34543	5.13913	6.93495	WBGene00200555	R153.5
X1313	chrII	7642953	7643213	261	*	261	7635456	7635601	+	downstream	7497	7352	NearestLocation	1.61291	11.7226	13.9958	WBGene00200555	R153.5
X1314	chrII	7758431	7758931	501	*	501	7757190	7758439	-	overlapStart	8	8	NearestLocation	1.87683	4.75204	6.50101	WBGene00015064	B0228.7
X1315	chrII	7810849	7811412	564	*	564	7811240	7812103	+	overlapStart	-391	172	NearestLocation	1.44759	4.86859	6.64246	WBGene00000516	cki-1
X1316	chrII	7863639	7864030	392	*	392	7864074	7866259	+	upstream	-435	44	NearestLocation	1.295	4.01504	5.71222	WBGene00011638	ostb-1
X1317	chrII	7870622	7870875	254	*	254	7866254	7870162	-	upstream	-460	460	NearestLocation	1.54128	9.02944	11.1082	WBGene00011639	ztf-17
X1318	chrII	7879391	7879654	264	*	264	7878083	7879336	-	upstream	-55	55	NearestLocation	1.62031	9.87307	12.0127	WBGene00006913	vha-4
X1319	chrII	7888119	7888413	295	*	295	7888234	7888439	+	overlapStart	-115	26	NearestLocation	1.54666	2.06692	3.58702	WBGene00198541	T01H3.8
X1320	chrII	7889883	7890200	318	*	318	7888249	7888454	-	upstream	-1429	1429	NearestLocation	1.44686	1.34583	2.78301	WBGene00201121	T01H3.9
X1321	chrII	7893088	7893423	336	*	336	7893229	7900484	+	overlapStart	-141	141	NearestLocation	1.62167	13.3204	15.7109	WBGene00004208	ptc-1
X1322	chrII	7921830	7922095	266	*	266	7928345	7928422	+	upstream	-6515	6250	NearestLocation	2.00907	9.97213	12.118	WBGene00199435	ZK669.8
X1323	chrII	7985267	7985543	277	*	277	7988230	7988362	+	upstream	-2963	2687	NearestLocation	1.73046	8.60295	10.6427	WBGene00196842	DH11.7
X1324	chrII	8034442	8034998	557	*	557	8034345	8035767	-	inside	1325	97	NearestLocation	1.46955	8.19469	10.2136	WBGene00004723	sap-49
X1325	chrII	8042566	8042817	252	*	252	8042589	8047446	+	overlapStart	-23	23	NearestLocation	1.51419	7.85778	9.84996	WBGene00011507	T05H10.1
X1326	chrII	8070493	8070765	273	*	273	8067998	8073372	-	inside	2879	2495	NearestLocation	1.48235	8.75123	10.8041	WBGene00011511	gpcp-2
X1327	chrII	8115277	8115557	281	*	281	8116356	8122904	+	upstream	-1079	799	NearestLocation	1.76009	4.08321	5.78846	WBGene00006832	unc-105
X1328	chrII	8143863	8144168	306	*	306	8143863	8144673	+	inside	0	0	NearestLocation	1.56268	3.7783	5.46221	WBGene00004421	rpl-10
X1329	chrII	8144390	8144654	265	*	265	8144797	8147242	+	upstream	-407	143	NearestLocation	1.72457	8.06755	10.0738	WBGene00008639	F10B5.2
X1330	chrII	8204816	8205193	378	*	378	8204341	8207573	+	inside	475	475	NearestLocation	2.00322	11.5068	13.7624	WBGene00000652	col-76
X1331	chrII	8205989	8206321	333	*	333	8204341	8207573	+	inside	1648	1252	NearestLocation	2.02043	12.2703	14.5804	WBGene00000652	col-76
X1332	chrII	8217873	8218260	388	*	388	8217231	8222201	+	inside	642	642	NearestLocation	1.2909	3.78628	5.45854	WBGene00002066	ifg-1
X1333	chrII	8224769	8225188	420	*	420	8226132	8229150	+	upstream	-1363	944	NearestLocation	1.78582	4.36641	6.09163	WBGene00000894	dab-1
X1334	chrII	8225748	8226303	556	*	556	8226132	8229150	+	overlapStart	-384	171	NearestLocation	1.4665	1.20341	2.6215	WBGene00000894	dab-1
X1335	chrII	8283575	8283843	269	*	269	8283667	8285711	+	overlapStart	-92	92	NearestLocation	1.62545	15.17	17.7047	WBGene00000379	cct-4
X1336	chrII	8457487	8457739	253	*	253	8457818	8464565	+	upstream	-331	79	NearestLocation	1.58615	7.24235	9.1935	WBGene00006994	zyg-9
X1337	chrII	8458525	8458815	291	*	291	8457818	8464565	+	inside	707	707	NearestLocation	1.75956	7.61885	9.59335	WBGene00006994	zyg-9
X1338	chrII	8460708	8460995	288	*	288	8457818	8464565	+	inside	2890	2890	NearestLocation	1.67928	8.303	10.3088	WBGene00006994	zyg-9
X1339	chrII	8481599	8481881	283	*	283	8480486	8482216	-	inside	617	335	NearestLocation	1.44769	1.63083	3.10438	WBGene00010878	M05D6.5
X1340	chrII	8500537	8500784	248	*	248	8494271	8495715	+	downstream	6266	4822	NearestLocation	1.60649	12.176	14.4846	WBGene00010881	M05D6.9
X1341	chrII	8568251	8568710	460	*	460	8567967	8567987	+	downstream	284	264	NearestLocation	1.71986	4.2049	5.91877	WBGene00167900	21ur-12386
X1342	chrII	8570148	8570969	822	*	822	8571085	8572902	+	upstream	-937	116	NearestLocation	1.46267	5.56545	7.37743	WBGene00010042	bcs-1
X1343	chrII	8575709	8575961	253	*	253	8575541	8577722	+	inside	168	168	NearestLocation	1.50199	3.19504	4.82926	WBGene00004241	puf-5
X1344	chrII	8602744	8603006	263	*	263	8602971	8603103	+	overlapStart	-227	35	NearestLocation	1.59313	13.7326	16.1592	WBGene00045130	F28C6.11
X1345	chrII	8603362	8603613	252	*	252	8603846	8606744	+	upstream	-484	233	NearestLocation	1.52959	9.13978	11.2278	WBGene00006307	suf-1
X1346	chrII	8625391	8625719	329	*	329	8625728	8627620	+	upstream	-337	9	NearestLocation	1.36572	4.05599	5.75023	WBGene00011926	sptf-2
X1347	chrII	8678285	8678545	261	*	261	8669133	8679891	-	inside	1606	1346	NearestLocation	1.59208	10.4772	12.6618	WBGene00008430	hgap-2
X1348	chrII	8684179	8684598	420	*	420	8680197	8684897	-	inside	718	299	NearestLocation	1.45233	1.6622	3.1391	WBGene00007915	C34C6.2
X1349	chrII	8701347	8701627	281	*	281	8699046	8701668	-	inside	321	41	NearestLocation	1.7686	3.91665	5.60839	WBGene00007918	sphk-1
X1350	chrII	8720360	8720654	295	*	295	8722474	8725515	+	upstream	-2114	1820	NearestLocation	1.86998	5.89371	7.74161	WBGene00011312	trcs-2
X1351	chrII	8742996	8743287	292	*	292	8743725	8747234	+	upstream	-729	438	NearestLocation	1.8167	15.6981	18.2712	WBGene00010681	mak-1
X1352	chrII	8745256	8745506	251	*	251	8743725	8747234	+	inside	1531	1531	NearestLocation	1.70889	4.44999	6.18657	WBGene00010681	mak-1
X1353	chrII	8770939	8771266	328	*	328	8770975	8782021	+	overlapStart	-36	36	NearestLocation	1.5831	2.19049	3.72375	WBGene00002295	let-19
X1354	chrII	8784652	8784913	262	*	262	8784535	8785513	+	inside	117	117	NearestLocation	1.46786	9.15088	11.2348	WBGene00014307	F07H5.3
X1355	chrII	8786829	8787097	269	*	269	8786457	8787119	+	inside	372	22	NearestLocation	1.48651	2.06904	3.58919	WBGene00014308	F07H5.4
X1356	chrII	8787979	8788331	353	*	353	8787770	8789716	+	inside	209	209	NearestLocation	1.44166	1.89265	3.39337	WBGene00014309	F07H5.5
X1357	chrII	8867361	8867653	293	*	293	8860913	8865173	-	upstream	-2188	2188	NearestLocation	2.15677	16.0357	18.6493	WBGene00011578	npr-20
X1358	chrII	8921080	8921401	322	*	322	8922452	8924373	+	upstream	-1372	1051	NearestLocation	1.56437	1.76388	3.25455	WBGene00007180	B0457.6
X1359	chrII	8921998	8922569	572	*	572	8922452	8924373	+	overlapStart	-454	117	NearestLocation	1.5993	2.42062	3.97852	WBGene00007180	B0457.6
X1360	chrII	8928995	8929270	276	*	276	8929841	8930937	+	upstream	-846	571	NearestLocation	1.77608	10.6245	12.8174	WBGene00011883	mrpl-50
X1361	chrII	8931426	8931999	574	*	574	8930985	8933799	+	inside	441	441	NearestLocation	1.45652	9.04618	11.111	WBGene00011884	enol-1
X1362	chrII	8932254	8932818	565	*	565	8930985	8933799	+	inside	1269	981	NearestLocation	1.79448	15.455	18.0179	WBGene00011884	enol-1
X1363	chrII	8933327	8934014	688	*	688	8934382	8939130	+	upstream	-1055	368	NearestLocation	1.73013	5.03488	6.817	WBGene00011885	T21B10.3
X1364	chrII	8947522	8947787	266	*	266	8942674	8947688	-	overlapStart	166	99	NearestLocation	1.56812	9.79785	11.9279	WBGene00011888	cutl-15
X1365	chrII	8972385	8972722	338	*	338	8971958	8973566	-	inside	1181	427	NearestLocation	1.70968	3.0357	4.65413	WBGene00007686	tomm-40
X1366	chrII	8973357	8973617	261	*	261	8971958	8973566	-	overlapStart	209	51	NearestLocation	1.63084	2.27681	3.82271	WBGene00007686	tomm-40
X1367	chrII	9007679	9008003	325	*	325	9002527	9005167	-	upstream	-2512	2512	NearestLocation	1.2704	3.41705	5.06202	WBGene00009716	F44G4.7
X1368	chrII	9062403	9062669	267	*	267	9061982	9062128	+	downstream	421	275	NearestLocation	1.58656	11.3146	13.5557	WBGene00201871	T24B8.21
X1369	chrII	9076557	9076827	271	*	271	9077516	9077647	-	downstream	1090	689	NearestLocation	1.58417	12.8228	15.1775	WBGene00200126	T24B8.19
X1370	chrII	9113114	9113360	247	*	247	9113219	9132213	+	overlapStart	-105	105	NearestLocation	1.60367	5.38981	7.18785	WBGene00012005	jun-1
X1371	chrII	9113823	9114096	274	*	274	9113219	9132213	+	inside	604	604	NearestLocation	1.86967	5.57386	7.39791	WBGene00012005	jun-1
X1372	chrII	9114963	9115621	659	*	659	9113219	9132213	+	inside	1744	1744	NearestLocation	2.07461	7.36519	9.30359	WBGene00012005	jun-1
X1373	chrII	9116199	9116546	348	*	348	9113219	9132213	+	inside	2980	2980	NearestLocation	2.23185	11.456	13.7071	WBGene00012005	jun-1
X1374	chrII	9118248	9118505	258	*	258	9113219	9132213	+	inside	5029	5029	NearestLocation	1.90768	4.96831	6.74053	WBGene00012005	jun-1
X1375	chrII	9126979	9127531	553	*	553	9124971	9125239	-	upstream	-1740	1740	NearestLocation	1.62461	2.52014	4.08785	WBGene00220092	T24H10.12
X1376	chrII	9129236	9129528	293	*	293	9132215	9134539	+	upstream	-2979	2687	NearestLocation	1.62232	2.20798	3.74685	WBGene00007633	C16D2.1
X1377	chrII	9178875	9179126	252	*	252	9177300	9178631	+	downstream	1575	244	NearestLocation	1.71158	3.4038	5.05526	WBGene00011967	pir-1
X1378	chrII	9281510	9281852	343	*	343	9275054	9280098	-	upstream	-1412	1412	NearestLocation	1.4106	1.45019	2.90101	WBGene00007227	C01G6.5
X1379	chrII	9284991	9285244	254	*	254	9285932	9289136	+	upstream	-941	688	NearestLocation	1.60594	3.91534	5.60236	WBGene00006510	mtrr-1
X1380	chrII	9334681	9334927	247	*	247	9334014	9338897	+	inside	667	667	NearestLocation	1.77294	4.52396	6.26591	WBGene00004744	scp-1
X1381	chrII	9352542	9352818	277	*	277	9350652	9352797	-	overlapStart	255	21	NearestLocation	1.59818	13.5535	15.9636	WBGene00006433	sdhb-1
X1382	chrII	9354619	9354908	290	*	290	9356152	9356295	+	upstream	-1533	1244	NearestLocation	1.46949	7.05527	8.98274	WBGene00219945	F42A8.4
X1383	chrII	9362910	9363156	247	*	247	9358531	9369087	+	inside	4379	4379	NearestLocation	1.73104	4.34442	6.07602	WBGene00003196	mel-11
X1384	chrII	9418562	9418812	251	*	251	9417919	9418007	-	upstream	-555	555	NearestLocation	1.66258	2.50512	4.07675	WBGene00201759	M176.14
X1385	chrII	9490938	9491213	276	*	276	9486266	9488260	-	upstream	-2678	2678	NearestLocation	1.7549	9.23688	11.3314	WBGene00011849	T19H5.4
X1386	chrII	9494778	9495109	332	*	332	9486266	9488260	-	upstream	-6518	6518	NearestLocation	1.93159	7.40982	9.36401	WBGene00011849	T19H5.4
X1387	chrII	9497111	9497502	392	*	392	9503510	9503530	-	downstream	6419	6008	NearestLocation	1.52517	2.16577	3.69817	WBGene00174785	21ur-15401
X1388	chrII	9575897	9576160	264	*	264	9575971	9581469	+	overlapStart	-74	74	NearestLocation	1.78456	7.69812	9.68439	WBGene00001368	exc-7
X1389	chrII	9589161	9589417	257	*	257	9588200	9589761	-	inside	600	344	NearestLocation	1.85	6.46997	8.36332	WBGene00008456	E02H1.2
X1390	chrII	9599813	9600059	247	*	247	9597614	9598203	+	downstream	2199	1610	NearestLocation	1.71033	3.32435	4.96029	WBGene00008459	mrpl-53
X1391	chrII	9618426	9618834	409	*	409	9615800	9617123	-	upstream	-1303	1303	NearestLocation	1.47252	1.36945	2.81032	WBGene00011788	T15H9.2
X1392	chrII	9621100	9621353	254	*	254	9622415	9622695	-	downstream	1595	1062	NearestLocation	1.56067	4.19727	5.91733	WBGene00220071	T15H9.8
X1393	chrII	9622381	9623100	720	*	720	9622415	9622695	-	includeFeature	314	34	NearestLocation	1.62583	2.48557	4.04754	WBGene00220071	T15H9.8
X1394	chrII	9731877	9732317	441	*	441	9733422	9738011	+	upstream	-1545	1105	NearestLocation	1.43214	4.89187	6.64971	WBGene00003100	mab-3
X1395	chrII	9738451	9738717	267	*	267	9738935	9742884	-	downstream	4433	218	NearestLocation	1.72775	4.195	5.91144	WBGene00013144	Y53C12B.2
X1396	chrII	9746838	9747360	523	*	523	9746718	9750439	+	inside	120	120	NearestLocation	1.56919	3.61797	5.28387	WBGene00003785	nos-3
X1397	chrII	9890182	9890431	250	*	250	9886538	9891081	-	inside	899	650	NearestLocation	1.37617	2.23708	3.77588	WBGene00007463	vgln-1
X1398	chrII	9890650	9891128	479	*	479	9886538	9891081	-	overlapStart	431	47	NearestLocation	1.33286	3.55871	5.21915	WBGene00007463	vgln-1
X1399	chrII	9936143	9936403	261	*	261	9934404	9936893	-	inside	750	490	NearestLocation	1.69051	3.40154	5.05173	WBGene00007330	C05C10.3
X1400	chrII	9938164	9938623	460	*	460	9938106	9938963	-	inside	799	58	NearestLocation	1.7634	3.91084	5.59611	WBGene00007334	C05C10.7
X1401	chrII	9963242	9963507	266	*	266	9964072	9964177	+	upstream	-830	565	NearestLocation	1.9081	6.14772	8.01596	WBGene00197902	R53.10
X1402	chrII	9967847	9968143	297	*	297	9967270	9968049	-	overlapStart	202	94	NearestLocation	1.75581	7.37879	9.33898	WBGene00011273	R53.4
X1403	chrII	9970070	9970582	513	*	513	9969615	9970515	-	overlapStart	445	67	NearestLocation	1.67402	5.07139	6.84494	WBGene00011274	R53.5
X1404	chrII	9972971	9973667	697	*	697	9971064	9975046	-	inside	2075	1379	NearestLocation	1.80509	11.4296	13.6805	WBGene00011276	aakg-5
X1405	chrII	9974664	9975230	567	*	567	9971064	9975046	-	overlapStart	382	184	NearestLocation	1.57838	2.09014	3.60722	WBGene00011276	aakg-5
X1406	chrII	9975521	9975820	300	*	300	9971064	9975046	-	upstream	-475	475	NearestLocation	1.75687	3.47372	5.12407	WBGene00011276	aakg-5
X1407	chrII	9987498	9987760	263	*	263	9991160	10000346	+	upstream	-3662	3400	NearestLocation	1.86326	4.54774	6.29471	WBGene00002266	lec-3
X1408	chrII	9999745	10000035	291	*	291	10000333	10001142	-	downstream	1397	298	NearestLocation	1.93418	8.96395	11.0337	WBGene00003773	nlt-1
X1409	chrII	10013052	10013408	357	*	357	10009606	10016060	-	inside	3008	2652	NearestLocation	1.82718	4.48323	6.22602	WBGene00002265	lec-2
X1410	chrII	10020349	10020875	527	*	527	10009606	10016060	-	upstream	-4289	4289	NearestLocation	1.79652	7.42239	9.37302	WBGene00002265	lec-2
X1411	chrII	10022522	10022781	260	*	260	10026594	10027924	-	downstream	5402	3813	NearestLocation	1.84643	11.3437	13.5879	WBGene00009948	F52H3.6
X1412	chrII	10096058	10096377	320	*	320	10097390	10097485	-	downstream	1427	1013	NearestLocation	1.85435	7.99705	9.99622	WBGene00201704	ZK945.15
X1413	chrII	10096901	10097197	297	*	297	10097390	10097485	-	downstream	584	193	NearestLocation	1.64346	3.07969	4.697	WBGene00201704	ZK945.15
X1414	chrII	10135353	10135611	259	*	259	10134938	10135829	+	inside	415	218	NearestLocation	2.38658	16.9743	19.6451	WBGene00206354	F27E5.9
X1415	chrII	10136831	10137082	252	*	252	10137656	10139217	+	upstream	-825	574	NearestLocation	1.58981	5.20385	6.99183	WBGene00004017	phg-1
X1416	chrII	10248883	10249325	443	*	443	10248991	10251171	+	overlapStart	-108	108	NearestLocation	2.12779	19.5316	22.4205	WBGene00010015	atad-3
X1417	chrII	10346126	10346382	257	*	257	10346397	10347008	+	upstream	-271	15	NearestLocation	1.96801	7.22328	9.17301	WBGene00007420	C07E3.10
X1418	chrII	10377893	10378159	267	*	267	10377999	10378135	+	includeFeature	-106	24	NearestLocation	1.70593	6.84295	8.76217	WBGene00195392	C07E3.13
X1418	chrII	10377893	10378159	267	*	267	10377999	10378135	-	includeFeature	242	24	NearestLocation	1.70593	6.84295	8.76217	WBGene00201527	C07E3.16
X1419	chrII	10382181	10382715	535	*	535	10382582	10382651	+	includeFeature	-401	64	NearestLocation	1.50695	3.15534	4.78129	WBGene00200273	C07E3.15
X1420	chrII	10383100	10383926	827	*	827	10382582	10382651	+	downstream	518	449	NearestLocation	1.81212	9.17369	11.2549	WBGene00200273	C07E3.15
X1421	chrII	10385682	10385949	268	*	268	10385333	10388133	+	inside	349	349	NearestLocation	1.73574	4.11256	5.81842	WBGene00011661	ztf-27
X1422	chrII	10390755	10391525	771	*	771	10391154	10393620	+	overlapStart	-399	371	NearestLocation	1.91737	6.36945	8.25607	WBGene00011662	T09F3.2
X1423	chrII	10391799	10392088	290	*	290	10391154	10393620	+	inside	645	645	NearestLocation	1.5744	2.61656	4.19607	WBGene00011662	T09F3.2
X1424	chrII	10417559	10417847	289	*	289	10416786	10419418	+	inside	773	773	NearestLocation	1.72748	11.7977	14.0719	WBGene00008480	E04D5.1
X1425	chrII	10418494	10418758	265	*	265	10416786	10419418	+	inside	1708	660	NearestLocation	1.7407	9.37822	11.4813	WBGene00008480	E04D5.1
X1426	chrII	10443346	10443613	268	*	268	10443327	10445156	+	inside	19	19	NearestLocation	1.74937	9.16699	11.2518	WBGene00014057	ZK673.1
X1427	chrII	10448212	10448987	776	*	776	10448266	10450227	+	overlapStart	-54	54	NearestLocation	1.64633	2.91558	4.51463	WBGene00014058	ZK673.2
X1428	chrII	10452515	10452761	247	*	247	10452920	10455199	+	upstream	-405	159	NearestLocation	1.45699	2.20475	3.73597	WBGene00014060	ZK673.4
X1429	chrII	10527507	10527829	323	*	323	10529447	10529798	+	upstream	-1940	1618	NearestLocation	1.30294	4.13624	5.85328	WBGene00198906	R166.8
X1430	chrII	10529375	10529736	362	*	362	10529447	10529798	+	overlapStart	-72	62	NearestLocation	1.67196	5.99832	7.84811	WBGene00198906	R166.8
X1431	chrII	10531001	10531257	257	*	257	10530409	10533506	+	inside	592	592	NearestLocation	1.50831	5.65058	7.47893	WBGene00003107	mab-10
X1432	chrII	10545713	10546041	329	*	329	10545199	10545329	-	upstream	-384	384	NearestLocation	1.58193	10.3583	12.5234	WBGene00045074	R166.7
X1433	chrII	10547110	10547677	568	*	568	10545199	10545329	-	upstream	-1781	1781	NearestLocation	1.26891	3.97194	5.65718	WBGene00045074	R166.7
X1434	chrII	10555479	10555739	261	*	261	10555251	10555371	-	upstream	-108	108	NearestLocation	1.67912	13.8209	16.2492	WBGene00220052	R166.10
X1435	chrII	10556833	10557106	274	*	274	10557565	10557644	-	downstream	811	459	NearestLocation	1.70718	8.48452	10.5235	WBGene00220053	R166.11
X1436	chrII	10557718	10558375	658	*	658	10557565	10557644	-	upstream	-74	74	NearestLocation	1.59957	4.41353	6.14086	WBGene00220053	R166.11
X1437	chrII	10558933	10559256	324	*	324	10557565	10557644	-	upstream	-1289	1289	NearestLocation	1.6395	11.9024	14.1855	WBGene00220053	R166.11
X1438	chrII	10561184	10561452	269	*	269	10560717	10560934	-	upstream	-250	250	NearestLocation	1.62208	7.40804	9.36934	WBGene00045148	C06A1.8
X1439	chrII	10578003	10578301	299	*	299	10574842	10578193	-	overlapStart	190	108	NearestLocation	1.90935	11.1568	13.385	WBGene00014667	C06A1.4
X1440	chrII	10612349	10612648	300	*	300	10613020	10618335	+	upstream	-671	372	NearestLocation	2.00262	9.48489	11.5933	WBGene00007562	C14A4.12
X1441	chrII	10652152	10652419	268	*	268	10648938	10652256	-	overlapStart	104	104	NearestLocation	1.62338	11.0083	13.2267	WBGene00010898	nphp-1
X1442	chrII	10657602	10657911	310	*	310	10652352	10657801	-	overlapStart	199	110	NearestLocation	1.59245	10.1073	12.2573	WBGene00010897	lact-3
X1443	chrII	10658147	10658468	322	*	322	10652352	10657801	-	upstream	-346	346	NearestLocation	1.82693	14.7463	17.2465	WBGene00010897	lact-3
X1444	chrII	10704001	10704350	350	*	350	10703618	10704574	+	inside	383	224	NearestLocation	1.33876	3.07277	4.69327	WBGene00000655	col-79
X1445	chrII	10742598	10742887	290	*	290	10737402	10738628	+	downstream	5196	3970	NearestLocation	2.26981	10.9264	13.1401	WBGene00008257	C52A11.3
X1446	chrII	10821093	10821443	351	*	351	10821031	10822694	+	inside	62	62	NearestLocation	1.73449	4.60399	6.3499	WBGene00001153	ech-4
X1447	chrII	10828209	10828513	305	*	305	10827716	10829556	-	inside	1347	493	NearestLocation	1.73124	8.71059	10.7613	WBGene00014848	VM106R.1
X1448	chrII	10829633	10829900	268	*	268	10827716	10829556	-	upstream	-77	77	NearestLocation	1.53518	1.92025	3.42589	WBGene00014848	VM106R.1
X1449	chrII	10861549	10862457	909	*	909	10857473	10860909	-	upstream	-640	640	NearestLocation	1.79698	4.21841	5.91971	WBGene00010911	M106.3
X1450	chrII	10917799	10918142	344	*	344	10918706	10920184	+	upstream	-907	564	NearestLocation	2.18206	8.28757	10.3082	WBGene00006530	tba-4
X1451	chrII	10948745	10949123	379	*	379	10947566	10949184	+	inside	1179	61	NearestLocation	1.47605	1.30562	2.73811	WBGene00010991	R03D7.5
X1452	chrII	10998946	10999514	569	*	569	10998059	10998207	-	upstream	-739	739	NearestLocation	1.58556	3.10275	4.71847	WBGene00196274	C09D8.4
X1453	chrII	11044047	11044567	521	*	521	11042934	11043080	-	upstream	-967	967	NearestLocation	1.33994	5.01888	6.78598	WBGene00201303	F33A8.11
X1454	chrII	11049256	11049545	290	*	290	11045792	11049030	-	upstream	-226	226	NearestLocation	1.72958	12.6044	14.9391	WBGene00009352	F33A8.4
X1455	chrII	11125389	11125636	248	*	248	11125368	11126362	-	inside	973	21	NearestLocation	1.56082	8.11653	10.1334	WBGene00004478	rps-9
X1456	chrII	11125944	11126694	751	*	751	11125368	11126362	-	overlapStart	418	332	NearestLocation	1.69294	7.97787	9.96621	WBGene00004478	rps-9
X1457	chrII	11156978	11157262	285	*	285	11157793	11157934	+	upstream	-815	531	NearestLocation	1.80569	8.12609	10.1395	WBGene00197003	K07C10.5
X1458	chrII	11233931	11234182	252	*	252	11232756	11234952	-	inside	1021	770	NearestLocation	1.50513	7.2233	9.16615	WBGene00011526	cox-15
X1459	chrII	11236010	11236346	337	*	337	11235052	11236450	-	inside	440	104	NearestLocation	2.21199	18.9125	21.7459	WBGene00011527	cchl-1
X1460	chrII	11299801	11300058	258	*	258	11301359	11302779	+	upstream	-1558	1301	NearestLocation	1.51266	2.81463	4.41368	WBGene00006414	raga-1
X1461	chrII	11300298	11300565	268	*	268	11301359	11302779	+	upstream	-1061	794	NearestLocation	1.59278	7.2946	9.24642	WBGene00006414	raga-1
X1462	chrII	11305148	11305412	265	*	265	11306399	11311940	+	upstream	-1251	987	NearestLocation	1.53904	10.9665	13.185	WBGene00011995	rsf-1
X1463	chrII	11305653	11305904	252	*	252	11306399	11311940	+	upstream	-746	495	NearestLocation	1.58418	11.0582	13.2837	WBGene00011995	rsf-1
X1464	chrII	11334182	11334428	247	*	247	11334508	11334579	+	upstream	-326	80	NearestLocation	1.5444	8.66176	10.7149	WBGene00008135	B0491.t1
X1465	chrII	11377265	11377514	250	*	250	11375652	11376271	-	upstream	-994	994	NearestLocation	1.94009	16.5313	19.1618	WBGene00007892	C33B4.4
X1466	chrII	11414759	11415031	273	*	273	11411882	11415772	-	inside	1013	741	NearestLocation	2.0804	8.81444	10.874	WBGene00007339	C05D12.1
X1467	chrII	11429479	11429732	254	*	254	11431868	11432766	+	upstream	-2389	2136	NearestLocation	1.73977	8.52384	10.5682	WBGene00007341	C05D12.4
X1468	chrII	11438005	11438362	358	*	358	11435211	11438464	-	inside	459	102	NearestLocation	2.09396	8.51101	10.5514	WBGene00006915	vha-6
X1469	chrII	11451801	11452057	257	*	257	11451444	11452955	-	inside	1154	357	NearestLocation	1.47186	7.3691	9.31931	WBGene00004699	rsp-2
X1470	chrII	11468928	11469199	272	*	272	11468552	11469624	-	inside	696	376	NearestLocation	1.50845	7.38342	9.3453	WBGene00044026	cisd-1
X1471	chrII	11472225	11472501	277	*	277	11470010	11472033	-	upstream	-192	192	NearestLocation	1.6573	3.06292	4.67735	WBGene00012204	mfn-1
X1472	chrII	11490808	11491319	512	*	512	11492517	11492666	+	upstream	-1709	1198	NearestLocation	1.75542	3.48852	5.13881	WBGene00200584	B0334.19
X1473	chrII	11544664	11544998	335	*	335	11542642	11544831	-	overlapStart	167	167	NearestLocation	1.41922	2.43162	3.98954	WBGene00010053	F54D5.9
X1474	chrII	11546055	11546435	381	*	381	11545701	11547366	+	inside	354	354	NearestLocation	1.50398	5.09441	6.87724	WBGene00001031	dnj-13
X1475	chrII	11612399	11612666	268	*	268	11612275	11614391	+	inside	124	124	NearestLocation	1.59407	12.3086	14.625	WBGene00008548	F07A11.5
X1476	chrII	11614055	11614371	317	*	317	11612275	11614391	+	inside	1780	20	NearestLocation	1.98379	14.2623	16.7207	WBGene00008548	F07A11.5
X1477	chrII	11617403	11617766	364	*	364	11617753	11617883	+	overlapStart	-350	13	NearestLocation	1.45611	2.90343	4.51153	WBGene00199740	F07A11.12
X1478	chrII	11618848	11619201	354	*	354	11619929	11620215	+	upstream	-1081	728	NearestLocation	1.62742	14.6762	17.1737	WBGene00198431	F07A11.10
X1479	chrII	11620481	11620741	261	*	261	11620025	11620295	+	downstream	456	186	NearestLocation	1.30543	4.8403	6.61228	WBGene00219879	F07A11.15
X1480	chrII	11630027	11630283	257	*	257	11614636	11633609	-	inside	3582	3326	NearestLocation	1.56584	10.582	12.7685	WBGene00008549	din-1
X1481	chrII	11632742	11633457	716	*	716	11614636	11633609	-	inside	867	152	NearestLocation	1.33473	4.11295	5.82258	WBGene00008549	din-1
X1482	chrII	11633923	11634212	290	*	290	11634196	11634334	-	overlapEnd	411	16	NearestLocation	1.36308	7.04012	8.97898	WBGene00197648	ZK20.8
X1483	chrII	11646744	11647067	324	*	324	11646747	11649109	+	overlapStart	-3	3	NearestLocation	1.867	8.11531	10.1226	WBGene00013923	ghi-1
X1484	chrII	11652164	11652410	247	*	247	11651260	11652906	-	inside	742	496	NearestLocation	1.30436	3.5301	5.19178	WBGene00013924	rad-23
X1485	chrII	11690730	11691150	421	*	421	11688970	11696062	+	inside	1760	1760	NearestLocation	1.61447	5.47219	7.2876	WBGene00002184	kel-1
X1486	chrII	11693763	11694174	412	*	412	11691326	11695657	-	inside	1894	1483	NearestLocation	1.95212	10.6974	12.8901	WBGene00006617	tars-1
X1487	chrII	11714793	11715052	260	*	260	11713836	11716809	+	inside	957	957	NearestLocation	1.52665	9.11213	11.1979	WBGene00008744	F13D12.10
X1488	chrII	11721550	11722017	468	*	468	11720507	11722315	+	inside	1043	298	NearestLocation	1.49135	7.7236	9.69372	WBGene00008739	F13D12.3
X1489	chrII	11724538	11724817	280	*	280	11725325	11726532	+	upstream	-787	508	NearestLocation	1.59433	11.664	13.9296	WBGene00002262	ldh-1
X1490	chrII	11725495	11726062	568	*	568	11725325	11726532	+	inside	170	170	NearestLocation	1.34879	3.51449	5.17411	WBGene00002262	ldh-1
X1491	chrII	11726780	11727175	396	*	396	11726817	11728512	+	overlapStart	-37	37	NearestLocation	1.32787	4.73661	6.49239	WBGene00008740	F13D12.5
X1492	chrII	11728087	11728375	289	*	289	11728949	11731226	+	upstream	-862	574	NearestLocation	1.84042	12.7272	15.0711	WBGene00000114	alh-8
X1493	chrII	11729303	11729956	654	*	654	11728949	11731226	+	inside	354	354	NearestLocation	1.52416	10.2203	12.3858	WBGene00000114	alh-8
X1494	chrII	11730184	11730519	336	*	336	11728949	11731226	+	inside	1235	707	NearestLocation	1.43166	8.28432	10.3015	WBGene00000114	alh-8
X1495	chrII	11731644	11731944	301	*	301	11731226	11732594	-	inside	950	418	NearestLocation	1.57956	11.2383	13.4739	WBGene00008742	F13D12.8
X1496	chrII	11741071	11741323	253	*	253	11739456	11743398	+	inside	1615	1615	NearestLocation	1.49271	7.2906	9.24715	WBGene00008741	F13D12.6
X1497	chrII	11742545	11742811	267	*	267	11739456	11743398	+	inside	3089	587	NearestLocation	1.55574	9.43593	11.5442	WBGene00008741	F13D12.6
X1498	chrII	11747629	11747883	255	*	255	11746923	11747060	+	downstream	706	569	NearestLocation	1.43663	8.904	10.9658	WBGene00195700	F13D12.11
X1499	chrII	11753229	11753495	267	*	267	11753268	11753479	-	includeFeature	250	16	NearestLocation	1.65207	6.02989	7.89315	WBGene00197701	F44E5.8
X1500	chrII	11774189	11774438	250	*	250	11774144	11774559	-	inside	370	45	NearestLocation	1.52381	9.32086	11.4199	WBGene00009688	F44E5.1
X1501	chrII	11778035	11778307	273	*	273	11778151	11782225	+	overlapStart	-116	116	NearestLocation	1.57485	9.00726	11.0793	WBGene00001016	dna-2
X1502	chrII	11813853	11814107	255	*	255	11812296	11814108	-	inside	255	1	NearestLocation	1.6433	3.56402	5.22739	WBGene00009660	F43G6.8
X1503	chrII	11833005	11833267	263	*	263	11833536	11833645	-	downstream	640	269	NearestLocation	1.61361	9.06451	11.1412	WBGene00014534	mir-355
X1504	chrII	11914961	11915246	286	*	286	11914566	11915421	+	inside	395	175	NearestLocation	1.79351	9.8385	11.9714	WBGene00014157	ZK930.7
X1505	chrII	11916715	11917038	324	*	324	11916513	11918319	+	inside	202	202	NearestLocation	1.23335	2.29789	3.84099	WBGene00001977	hmg-12
X1506	chrII	11962690	11962936	247	*	247	11962111	11965255	+	inside	579	579	NearestLocation	1.7749	7.61267	9.59437	WBGene00012220	W03C9.2
X1507	chrII	11966375	11966680	306	*	306	11965339	11966931	-	inside	556	251	NearestLocation	1.88653	9.10402	11.1862	WBGene00004271	rab-7
X1508	chrII	11967140	11967800	661	*	661	11967048	11967533	-	overlapStart	393	92	NearestLocation	1.65508	14.8293	17.3557	WBGene00012221	W03C9.5
X1509	chrII	11972372	11972819	448	*	448	11972313	11973691	-	inside	1319	59	NearestLocation	1.27117	2.09542	3.61701	WBGene00012457	acbp-6
X1510	chrII	11973262	11973516	255	*	255	11972313	11973691	-	inside	429	175	NearestLocation	1.6069	5.33228	7.14232	WBGene00012457	acbp-6
X1511	chrII	11977361	11977714	354	*	354	11975967	11977659	-	overlapStart	298	55	NearestLocation	1.8123	11.1981	13.4313	WBGene00012472	Y17G7B.21
X1512	chrII	11978534	11978814	281	*	281	11975967	11977659	-	upstream	-875	875	NearestLocation	1.42916	7.50939	9.47731	WBGene00012472	Y17G7B.21
X1513	chrII	11979319	11980022	704	*	704	11977784	11979859	-	overlapStart	540	163	NearestLocation	1.63313	7.62519	9.58206	WBGene00012471	Y17G7B.20
X1514	chrII	11980608	11981034	427	*	427	11980426	11988861	+	inside	182	182	NearestLocation	1.69813	12.7744	15.121	WBGene00012458	ash-2
X1515	chrII	11982089	11982346	258	*	258	11980426	11988861	+	inside	1663	1663	NearestLocation	1.63357	7.01757	8.95393	WBGene00012458	ash-2
X1516	chrII	12008202	12008454	253	*	253	12009077	12023825	+	upstream	-875	623	NearestLocation	1.67144	10.5823	12.7734	WBGene00012461	glb-29
X1517	chrII	12027415	12027903	489	*	489	12025886	12027746	-	overlapStart	331	157	NearestLocation	1.58052	1.89872	3.40224	WBGene00012462	Y17G7B.8
X1518	chrII	12037261	12037611	351	*	351	12028763	12036735	-	upstream	-526	526	NearestLocation	2.11017	9.01072	11.0819	WBGene00000892	cyn-16
X1519	chrII	12038432	12039202	771	*	771	12036831	12039139	-	overlapStart	707	63	NearestLocation	2.12428	13.9711	16.4321	WBGene00006601	tpi-1
X1520	chrII	12039560	12040011	452	*	452	12036831	12039139	-	upstream	-421	421	NearestLocation	1.43508	2.21386	3.75066	WBGene00006601	tpi-1
X1521	chrII	12040483	12040896	414	*	414	12041957	12042146	-	downstream	1663	1061	NearestLocation	1.37887	1.81245	3.30237	WBGene00220134	Y17G7B.25
X1522	chrII	12041973	12042421	449	*	449	12041957	12042146	-	overlapStart	173	16	NearestLocation	1.47624	2.28165	3.82451	WBGene00220134	Y17G7B.25
X1523	chrII	12042906	12043264	359	*	359	12042910	12049045	+	overlapStart	-4	4	NearestLocation	1.84219	6.98964	8.91208	WBGene00012466	Y17G7B.13
X1524	chrII	12051019	12051651	633	*	633	12049583	12059889	+	inside	1436	1436	NearestLocation	1.78442	13.1135	15.5041	WBGene00012463	Y17G7B.10
X1525	chrII	12052141	12052410	270	*	270	12049583	12059889	+	inside	2558	2558	NearestLocation	1.4711	1.81784	3.31052	WBGene00012463	Y17G7B.10
X1526	chrII	12052792	12053054	263	*	263	12049583	12059889	+	inside	3209	3209	NearestLocation	1.69882	4.84352	6.61625	WBGene00012463	Y17G7B.10
X1527	chrII	12054617	12054939	323	*	323	12049583	12059889	+	inside	5034	4950	NearestLocation	1.91152	12.966	15.3297	WBGene00012463	Y17G7B.10
X1528	chrII	12055447	12056147	701	*	701	12049583	12059889	+	inside	5864	3742	NearestLocation	1.65187	10.734	12.9382	WBGene00012463	Y17G7B.10
X1529	chrII	12056729	12057137	409	*	409	12060228	12062619	-	downstream	5890	3091	NearestLocation	1.63594	4.84459	6.59299	WBGene00012464	arrd-7
X1530	chrII	12070684	12071081	398	*	398	12068099	12070675	+	downstream	2585	9	NearestLocation	1.23532	1.8179	3.31229	WBGene00012473	Y17G7B.22
X1531	chrII	12071595	12071968	374	*	374	12068099	12070675	+	downstream	3496	920	NearestLocation	1.59547	10.8287	13.0328	WBGene00012473	Y17G7B.22
X1532	chrII	12075145	12075686	542	*	542	12068099	12070675	+	downstream	7046	4470	NearestLocation	1.43909	5.50664	7.30748	WBGene00012473	Y17G7B.22
X1533	chrII	12077397	12077643	247	*	247	12068099	12070675	+	downstream	9298	6722	NearestLocation	1.75	3.38975	5.03783	WBGene00012473	Y17G7B.22
X1534	chrII	12079485	12080116	632	*	632	12072070	12088861	-	inside	9376	7415	NearestLocation	1.90019	6.74928	8.65934	WBGene00000565	cnt-1
X1535	chrII	12084107	12084464	358	*	358	12072070	12088861	-	inside	4754	4397	NearestLocation	1.90682	19.2491	22.1111	WBGene00000565	cnt-1
X1536	chrII	12090039	12091134	1096	*	1096	12072070	12088861	-	upstream	-1178	1178	NearestLocation	1.72183	5.61461	7.44309	WBGene00000565	cnt-1
X1537	chrII	12098739	12099037	299	*	299	12092422	12099989	-	inside	1250	952	NearestLocation	2.02699	14.8551	17.3606	WBGene00012468	Y17G7B.17
X1538	chrII	12176168	12176731	564	*	564	12178470	12178764	+	upstream	-2302	1739	NearestLocation	1.50847	3.78908	5.46755	WBGene00219623	anr-2
X1539	chrII	12213442	12213830	389	*	389	12209228	12221788	-	inside	8346	4214	NearestLocation	1.28832	1.91498	3.41932	WBGene00004167	pqn-87
X1540	chrII	12219491	12220016	526	*	526	12209228	12221788	-	inside	2297	1772	NearestLocation	1.43661	5.39683	7.20467	WBGene00004167	pqn-87
X1541	chrII	12224871	12225221	351	*	351	12225358	12227291	+	upstream	-487	137	NearestLocation	1.7107	8.2074	10.2161	WBGene00013260	rsr-2
X1542	chrII	12256416	12256742	327	*	327	12251737	12256628	-	overlapStart	212	114	NearestLocation	1.8458	12.6281	14.9659	WBGene00013265	parn-2
X1543	chrII	12257615	12257918	304	*	304	12251737	12256628	-	upstream	-987	987	NearestLocation	1.63336	6.84936	8.76116	WBGene00013265	parn-2
X1544	chrII	12258883	12259406	524	*	524	12251737	12256628	-	upstream	-2255	2255	NearestLocation	1.39204	4.62031	6.37449	WBGene00013265	parn-2
X1545	chrII	12260928	12261293	366	*	366	12264166	12266105	+	upstream	-3238	2873	NearestLocation	1.55927	11.5658	13.8302	WBGene00013266	Y57A10A.26
X1546	chrII	12264130	12264430	301	*	301	12264166	12266105	+	overlapStart	-36	36	NearestLocation	1.89926	13.7465	16.1691	WBGene00013266	Y57A10A.26
X1547	chrII	12264912	12265250	339	*	339	12264166	12266105	+	inside	746	746	NearestLocation	1.34341	2.82939	4.42429	WBGene00013266	Y57A10A.26
X1548	chrII	12283749	12284011	263	*	263	12280662	12284134	+	inside	3087	123	NearestLocation	1.81268	3.96902	5.66981	WBGene00002063	ife-5
X1549	chrII	12340717	12341108	392	*	392	12339944	12344793	+	inside	773	773	NearestLocation	1.39196	2.38416	3.93308	WBGene00004945	sop-2
X1550	chrII	12344795	12345254	460	*	460	12344834	12345286	+	overlapStart	-39	32	NearestLocation	1.54385	8.0485	10.0477	WBGene00206479	C44C11.6
X1551	chrII	12345933	12346492	560	*	560	12345880	12345950	-	overlapStart	17	17	NearestLocation	1.468	6.42334	8.29916	WBGene00023253
X1552	chrII	12348302	12349873	1572	*	1572	12349636	12349707	-	includeFeature	1405	166	NearestLocation	1.64158	9.69536	11.817	WBGene00023254
X1553	chrII	12351960	12352554	595	*	595	12345406	12352459	-	overlapStart	499	95	NearestLocation	1.6273	10.9719	13.1899	WBGene00004310	ras-1
X1554	chrII	12354384	12354664	281	*	281	12354536	12354621	+	includeFeature	-152	43	NearestLocation	1.60432	2.54568	4.11536	WBGene00200610	C44C11.5
X1555	chrII	12361141	12361401	261	*	261	12362449	12362522	+	upstream	-1308	1048	NearestLocation	1.78477	6.6531	8.5569	WBGene00014590	Y57A10B.t1
X1556	chrII	12368547	12369393	847	*	847	12358692	12367023	-	upstream	-1524	1524	NearestLocation	1.59287	1.98888	3.50293	WBGene00013273	marc-5
X1557	chrII	12371472	12371741	270	*	270	12358692	12367023	-	upstream	-4449	4449	NearestLocation	1.71859	5.02473	6.80865	WBGene00013273	marc-5
X1558	chrII	12372326	12372619	294	*	294	12358692	12367023	-	upstream	-5303	5303	NearestLocation	2.26441	10.6982	12.8985	WBGene00013273	marc-5
X1559	chrII	12382706	12382983	278	*	278	12383469	12384692	+	upstream	-763	486	NearestLocation	1.74705	7.40947	9.37106	WBGene00013275	btb-14
X1560	chrII	12513362	12513618	257	*	257	12513618	12514715	-	overlapEnd	1353	0	NearestLocation	1.68591	10.6787	12.8765	WBGene00005290	srh-69
X1561	chrII	12515497	12515746	250	*	250	12514972	12516413	-	inside	916	525	NearestLocation	1.53337	7.39717	9.35559	WBGene00005283	srh-61
X1562	chrII	12577293	12577611	319	*	319	12575691	12577722	-	inside	429	111	NearestLocation	2.10947	7.50641	9.46783	WBGene00012582	clec-8
X1563	chrII	12603375	12603667	293	*	293	12582176	12603680	-	inside	305	13	NearestLocation	1.79016	7.56606	9.53944	WBGene00012584	ceh-100
X1564	chrII	12604598	12605010	413	*	413	12582176	12603680	-	upstream	-918	918	NearestLocation	1.84281	7.24585	9.19329	WBGene00012584	ceh-100
X1565	chrII	12662636	12662951	316	*	316	12666159	12666230	-	downstream	3594	3208	NearestLocation	1.9103	13.2286	15.6122	WBGene00014873
X1566	chrII	12663454	12663738	285	*	285	12666159	12666230	-	downstream	2776	2421	NearestLocation	1.94233	8.75898	10.8183	WBGene00014873
X1567	chrII	12664367	12664678	312	*	312	12666159	12666230	-	downstream	1863	1481	NearestLocation	1.95667	14.2873	16.7514	WBGene00014873
X1568	chrII	12665159	12665424	266	*	266	12666159	12666230	-	downstream	1071	735	NearestLocation	1.77153	7.6607	9.63257	WBGene00014873
X1569	chrII	12666093	12666370	278	*	278	12666159	12666230	-	includeFeature	137	66	NearestLocation	1.55402	11.0522	13.2758	WBGene00014873
X1570	chrII	12666847	12667190	344	*	344	12667698	12671623	+	upstream	-851	508	NearestLocation	2.09546	18.9405	21.7757	WBGene00004347	rgs-4
X1571	chrII	12667706	12668476	771	*	771	12667698	12671623	+	inside	8	8	NearestLocation	1.71997	15.3495	17.8995	WBGene00004347	rgs-4
X1572	chrII	12668749	12669261	513	*	513	12669995	12670067	-	downstream	1318	734	NearestLocation	1.56094	8.9182	10.9847	WBGene00014872
X1573	chrII	12669932	12670200	269	*	269	12669995	12670067	-	includeFeature	135	63	NearestLocation	1.57612	10.608	12.7978	WBGene00014872
X1574	chrII	12671479	12671880	402	*	402	12669995	12670067	-	upstream	-1412	1412	NearestLocation	1.34419	5.35083	7.15921	WBGene00014872
X1575	chrII	12675905	12676209	305	*	305	12673206	12677798	-	inside	1893	1589	NearestLocation	1.9428	9.13925	11.2197	WBGene00012600	Y38E10A.22
X1576	chrII	12677303	12677722	420	*	420	12673206	12677798	-	inside	495	76	NearestLocation	1.83951	10.138	12.2896	WBGene00012600	Y38E10A.22
X1577	chrII	12681631	12681933	303	*	303	12679954	12686713	+	inside	1677	1677	NearestLocation	1.81672	7.14591	9.08641	WBGene00012895	cox-10
X1578	chrII	12687245	12687555	311	*	311	12694412	12725483	+	upstream	-7167	6857	NearestLocation	1.7869	10.516	12.6984	WBGene00012894	tbc-17
X1579	chrII	12687966	12688437	472	*	472	12694412	12725483	+	upstream	-6446	5975	NearestLocation	1.90934	4.99587	6.77141	WBGene00012894	tbc-17
X1580	chrII	12690401	12691651	1251	*	1251	12694412	12725483	+	upstream	-4011	2761	NearestLocation	1.66723	2.91458	4.50752	WBGene00012894	tbc-17
X1581	chrII	12692006	12693390	1385	*	1385	12694412	12725483	+	upstream	-2406	1022	NearestLocation	1.60713	2.83684	4.42517	WBGene00012894	tbc-17
X1582	chrII	12700544	12700810	267	*	267	12694412	12725483	+	inside	6132	6132	NearestLocation	2.03653	8.47313	10.5136	WBGene00012894	tbc-17
X1583	chrII	12706898	12707175	278	*	278	12694412	12725483	+	inside	12486	12486	NearestLocation	1.70976	4.78226	6.54078	WBGene00012894	tbc-17
X1584	chrII	12737636	12738025	390	*	390	12738002	12738143	-	overlapEnd	507	23	NearestLocation	1.36581	3.9015	5.58964	WBGene00045373	Y46G5A.40
X1585	chrII	12767323	12767624	302	*	302	12767221	12768217	-	inside	894	102	NearestLocation	1.34756	5.07391	6.8481	WBGene00012903	vps-2
X1586	chrII	12768664	12768954	291	*	291	12768742	12773844	+	overlapStart	-78	78	NearestLocation	1.71071	15.1558	17.6846	WBGene00012904	tiar-2
X1587	chrII	12795126	12795403	278	*	278	12787830	12796452	-	inside	1326	1049	NearestLocation	1.73253	6.95805	8.88852	WBGene00012907	cpt-1
X1588	chrII	12795990	12796287	298	*	298	12787830	12796452	-	inside	462	165	NearestLocation	1.67124	6.61038	8.50999	WBGene00012907	cpt-1
X1589	chrII	12797327	12797584	258	*	258	12787830	12796452	-	upstream	-875	875	NearestLocation	1.55778	12.3967	14.7218	WBGene00012907	cpt-1
X1590	chrII	12803763	12804044	282	*	282	12804862	12810874	+	upstream	-1099	818	NearestLocation	1.53904	7.47903	9.43429	WBGene00012909	spds-1
X1591	chrII	12804858	12805189	332	*	332	12804862	12810874	+	overlapStart	-4	4	NearestLocation	1.65625	5.37815	7.18725	WBGene00012909	spds-1
X1592	chrII	12805881	12806156	276	*	276	12800414	12805261	-	upstream	-620	620	NearestLocation	1.59277	13.9756	16.417	WBGene00012908	Y46G5A.18
X1593	chrII	12806875	12807164	290	*	290	12800414	12805261	-	upstream	-1614	1614	NearestLocation	1.58308	13.7233	16.1503	WBGene00012908	Y46G5A.18
X1594	chrII	12809261	12809874	614	*	614	12811037	12811931	+	upstream	-1776	1163	NearestLocation	1.47371	2.39569	3.95264	WBGene00012910	Y46G5A.20
X1595	chrII	12814485	12814805	321	*	321	12811659	12816462	-	inside	1977	1657	NearestLocation	1.67238	3.6396	5.29938	WBGene00012911	acl-7
X1596	chrII	12815997	12816326	330	*	330	12811659	12816462	-	inside	465	136	NearestLocation	1.71958	11.5327	13.79	WBGene00012911	acl-7
X1597	chrII	12816865	12817179	315	*	315	12811659	12816462	-	upstream	-403	403	NearestLocation	1.8203	11.8155	14.09	WBGene00012911	acl-7
X1598	chrII	12878473	12880116	1644	*	1644	12866448	12878104	-	upstream	-369	369	NearestLocation	1.75295	5.97795	7.8208	WBGene00001793	gsy-1
X1599	chrII	12880998	12881447	450	*	450	12880804	12882229	+	inside	194	194	NearestLocation	1.47278	2.3169	3.86262	WBGene00009390	F35C5.1
X1600	chrII	12881664	12882216	553	*	553	12880804	12882229	+	inside	860	13	NearestLocation	1.5244	7.63285	9.5926	WBGene00009390	F35C5.1
X1601	chrII	12892186	12892467	282	*	282	12890630	12892024	+	downstream	1556	162	NearestLocation	2.42994	16.6436	19.2892	WBGene00009392	F35C5.4
X1602	chrII	12892837	12893089	253	*	253	12893064	12895098	-	overlapEnd	2261	25	NearestLocation	1.82035	12.5715	14.9047	WBGene00009393	clec-62
X1603	chrII	12895620	12895977	358	*	358	12895638	12897462	+	overlapStart	-18	18	NearestLocation	1.80635	6.40455	8.27661	WBGene00009394	clec-63
X1604	chrII	12906263	12906509	247	*	247	12907405	12907782	+	upstream	-1142	896	NearestLocation	1.69516	8.77061	10.8283	WBGene00009398	nspb-11
X1605	chrII	12919496	12919746	251	*	251	12919577	12923373	+	overlapStart	-81	81	NearestLocation	1.63908	7.32829	9.28901	WBGene00010263	wago-4
X1606	chrII	12927954	12928214	261	*	261	12925979	12928336	-	inside	382	122	NearestLocation	1.46076	3.48061	5.13523	WBGene00010265	F58G1.3
X1607	chrII	12930897	12931281	385	*	385	12930617	12933524	+	inside	280	280	NearestLocation	1.73682	3.69282	5.36989	WBGene00010266	dct-18
X1608	chrII	12933010	12933266	257	*	257	12933855	12935357	-	downstream	2347	589	NearestLocation	1.55528	2.12287	3.65165	WBGene00010267	lips-9
X1609	chrII	12934222	12934480	259	*	259	12933855	12935357	-	inside	1135	367	NearestLocation	1.65189	4.6896	6.44076	WBGene00010267	lips-9
X1610	chrII	12948366	12948927	562	*	562	12943862	12948143	-	upstream	-223	223	NearestLocation	1.73039	5.02881	6.81433	WBGene00010269	F58G1.7
X1611	chrII	12951714	12951981	268	*	268	12953683	12953856	-	downstream	2142	1702	NearestLocation	1.74348	11.5712	13.8313	WBGene00045389	Y38F1A.11
X1612	chrII	12968672	12968930	259	*	259	12966872	12969215	-	inside	543	285	NearestLocation	1.45926	6.90753	8.83119	WBGene00012607	Y38F1A.4
X1613	chrII	13000629	13000913	285	*	285	12997986	13000853	-	overlapStart	224	60	NearestLocation	1.71601	7.88396	9.87555	WBGene00012610	Y38F1A.8
X1614	chrII	13014648	13015132	485	*	485	13009265	13012817	-	upstream	-1831	1831	NearestLocation	1.5256	1.51514	2.97518	WBGene00008932	F18A11.5
X1615	chrII	13022079	13022337	259	*	259	13020773	13021074	+	downstream	1306	1005	NearestLocation	1.48161	9.01108	11.0854	WBGene00202000	Y38F1A.13
X1616	chrII	13023538	13023872	335	*	335	13014331	13025838	-	inside	2300	1966	NearestLocation	1.52018	7.60344	9.57022	WBGene00003144	max-2
X1617	chrII	13028469	13028771	303	*	303	13028600	13028719	+	includeFeature	-131	52	NearestLocation	1.78333	6.06241	7.91657	WBGene00197909	F18A11.9
X1618	chrII	13029042	13029623	582	*	582	13029440	13029561	+	includeFeature	-398	62	NearestLocation	1.48664	2.32168	3.86731	WBGene00200302	F18A11.11
X1619	chrII	13030114	13030365	252	*	252	13029816	13029949	+	downstream	298	165	NearestLocation	1.39363	5.734	7.55969	WBGene00197188	F18A11.8
X1620	chrII	13037071	13037550	480	*	480	13036345	13036883	-	upstream	-188	188	NearestLocation	1.84313	5.05754	6.84258	WBGene00008930	F18A11.3
X1621	chrII	13038538	13038915	378	*	378	13039252	13039794	+	upstream	-714	337	NearestLocation	1.69832	5.80955	7.64281	WBGene00044057	F18A11.7
X1622	chrII	13056754	13057254	501	*	501	13056814	13071530	+	overlapStart	-60	60	NearestLocation	1.39647	4.38992	6.11691	WBGene00006999	zyx-1
X1623	chrII	13060650	13060957	308	*	308	13060057	13060505	-	upstream	-145	145	NearestLocation	1.81766	10.5262	12.7093	WBGene00200870	F42G4.10
X1624	chrII	13061692	13062000	309	*	309	13060057	13060505	-	upstream	-1187	1187	NearestLocation	2.2357	21.8667	24.9342	WBGene00200870	F42G4.10
X1625	chrII	13064826	13065126	301	*	301	13065381	13065520	-	downstream	694	255	NearestLocation	1.94819	15.1693	17.6962	WBGene00200330	F42G4.9
X1626	chrII	13065572	13065871	300	*	300	13065381	13065520	-	upstream	-52	52	NearestLocation	2.0663	9.06611	11.1462	WBGene00200330	F42G4.9
X1627	chrII	13066917	13067188	272	*	272	13065381	13065520	-	upstream	-1397	1397	NearestLocation	1.48793	9.15168	11.2356	WBGene00200330	F42G4.9
X1628	chrII	13067684	13068019	336	*	336	13065381	13065520	-	upstream	-2164	2164	NearestLocation	1.55344	2.08725	3.61308	WBGene00200330	F42G4.9
X1629	chrII	13068808	13069112	305	*	305	13065381	13065520	-	upstream	-3288	3288	NearestLocation	1.6365	2.99566	4.60943	WBGene00200330	F42G4.9
X1630	chrII	13070057	13070706	650	*	650	13073493	13076225	+	upstream	-3436	2787	NearestLocation	1.99977	7.97854	9.97635	WBGene00009642	F42G4.5
X1631	chrII	13072446	13072972	527	*	527	13073493	13076225	+	upstream	-1047	521	NearestLocation	1.85931	4.89564	6.65491	WBGene00009642	F42G4.5
X1632	chrII	13076733	13077169	437	*	437	13079416	13080756	+	upstream	-2683	2247	NearestLocation	1.60697	2.11934	3.64403	WBGene00009643	F42G4.6
X1633	chrII	13078588	13078857	270	*	270	13079416	13080756	+	upstream	-828	559	NearestLocation	1.65084	3.4515	5.10706	WBGene00009643	F42G4.6
X1634	chrII	13108535	13108861	327	*	327	13108019	13110170	+	inside	516	516	NearestLocation	1.37945	1.68698	3.16675	WBGene00004120	pqn-32
X1635	chrII	13116560	13116930	371	*	371	13098249	13116801	-	overlapStart	241	129	NearestLocation	1.57638	1.86255	3.36273	WBGene00009245	rict-1
X1636	chrII	13117363	13118195	833	*	833	13117483	13122085	+	overlapStart	-120	120	NearestLocation	1.91373	10.2926	12.4611	WBGene00009246	gfm-1
X1637	chrII	13157248	13157550	303	*	303	13157335	13160428	+	overlapStart	-87	87	NearestLocation	1.71183	11.5627	13.8221	WBGene00009307	F32A11.1
X1638	chrII	13162798	13163095	298	*	298	13160415	13165733	-	inside	2935	2383	NearestLocation	1.63839	4.62617	6.37292	WBGene00003388	moe-3
X1639	chrII	13166127	13166849	723	*	723	13160415	13165733	-	upstream	-394	394	NearestLocation	1.65334	2.89574	4.49157	WBGene00003388	moe-3
X1640	chrII	13189285	13189678	394	*	394	13185987	13187334	-	upstream	-1951	1951	NearestLocation	1.61724	13.7423	16.1733	WBGene00012375	mecr-1
X1641	chrII	13190158	13190732	575	*	575	13185987	13187334	-	upstream	-2824	2824	NearestLocation	1.6411	2.82925	4.42651	WBGene00012375	mecr-1
X1642	chrII	13191056	13191458	403	*	403	13193696	13193840	-	downstream	2784	2238	NearestLocation	1.94616	6.27912	8.15851	WBGene00195754	W09H1.7
X1643	chrII	13193306	13193878	573	*	573	13193696	13193840	-	includeFeature	534	38	NearestLocation	1.76107	4.94301	6.72078	WBGene00195754	W09H1.7
X1644	chrII	13194352	13195043	692	*	692	13195549	13199603	+	upstream	-1197	506	NearestLocation	1.81233	5.85597	7.70039	WBGene00002264	lec-1
X1645	chrII	13196065	13196802	738	*	738	13195549	13199603	+	inside	516	516	NearestLocation	1.9079	7.58914	9.54521	WBGene00002264	lec-1
X1646	chrII	13197136	13197665	530	*	530	13195549	13199603	+	inside	1587	1587	NearestLocation	1.49348	2.32321	3.87218	WBGene00002264	lec-1
X1647	chrII	13198015	13198615	601	*	601	13200163	13215710	+	upstream	-2148	1548	NearestLocation	1.50118	6.10862	7.96368	WBGene00000274	btf-1
X1648	chrII	13199246	13199509	264	*	264	13200163	13215710	+	upstream	-917	654	NearestLocation	1.64239	8.33363	10.3609	WBGene00000274	btf-1
X1649	chrII	13237371	13237791	421	*	421	13237405	13237908	-	overlapEnd	537	34	NearestLocation	2.0719	21.8737	24.9438	WBGene00008860	rmo-1
X1650	chrII	13279576	13279859	284	*	284	13283628	13283725	+	upstream	-4052	3769	NearestLocation	1.49412	9.54483	11.6571	WBGene00200945	Y48C3A.23
X1651	chrII	13281290	13281540	251	*	251	13283628	13283725	+	upstream	-2338	2088	NearestLocation	1.51168	8.96788	11.04	WBGene00200945	Y48C3A.23
X1652	chrII	13281822	13282089	268	*	268	13283628	13283725	+	upstream	-1806	1539	NearestLocation	1.80511	9.13471	11.2184	WBGene00200945	Y48C3A.23
X1653	chrII	13282634	13282888	255	*	255	13283628	13283725	+	upstream	-994	740	NearestLocation	1.53621	8.57764	10.6202	WBGene00200945	Y48C3A.23
X1654	chrII	13283518	13283809	292	*	292	13283628	13283725	-	includeFeature	207	84	NearestLocation	1.80234	14.0268	16.4693	WBGene00199755	Y48C3A.22
X1654	chrII	13283518	13283809	292	*	292	13283628	13283725	+	includeFeature	-110	84	NearestLocation	1.80234	14.0268	16.4693	WBGene00200945	Y48C3A.23
X1655	chrII	13285595	13285859	265	*	265	13279773	13285817	-	overlapStart	222	42	NearestLocation	1.51586	8.54406	10.5904	WBGene00012988	ztf-22
X1656	chrII	13289878	13290385	508	*	508	13279773	13285817	-	upstream	-4061	4061	NearestLocation	1.48771	8.00451	10.013	WBGene00012988	ztf-22
X1657	chrII	13290962	13291221	260	*	260	13279773	13285817	-	upstream	-5145	5145	NearestLocation	1.35924	6.60354	8.49849	WBGene00012988	ztf-22
X1658	chrII	13297569	13298229	661	*	661	13309290	13311479	+	upstream	-11721	11061	NearestLocation	1.68046	12.2324	14.5432	WBGene00012987	Y48C3A.3
X1659	chrII	13299060	13299386	327	*	327	13309290	13311479	+	upstream	-10230	9904	NearestLocation	1.85578	7.28942	9.23594	WBGene00012987	Y48C3A.3
X1660	chrII	13300439	13300916	478	*	478	13309290	13311479	+	upstream	-8851	8374	NearestLocation	1.34315	4.2931	6.02466	WBGene00012987	Y48C3A.3
X1661	chrII	13304281	13304701	421	*	421	13309290	13311479	+	upstream	-5009	4589	NearestLocation	1.71905	7.71288	9.68237	WBGene00012987	Y48C3A.3
X1662	chrII	13339378	13339630	253	*	253	13338281	13339968	+	inside	1097	338	NearestLocation	1.56798	6.20262	8.07551	WBGene00012992	mrpl-20
X1663	chrII	13448908	13449223	316	*	316	13442878	13447595	-	upstream	-1313	1313	NearestLocation	1.74707	5.20639	7.00181	WBGene00008444	tbc-14
X1664	chrII	13451426	13451673	248	*	248	13442878	13447595	-	upstream	-3831	3831	NearestLocation	1.35761	5.08588	6.86508	WBGene00008444	tbc-14
X1665	chrII	13456761	13457011	251	*	251	13448835	13460642	-	inside	3881	3631	NearestLocation	1.54671	11.7066	13.9808	WBGene00004116	pqn-27
X1666	chrII	13457253	13458103	851	*	851	13448835	13460642	-	inside	3389	2539	NearestLocation	1.6213	5.16352	6.91971	WBGene00004116	pqn-27
X1667	chrII	13459199	13459585	387	*	387	13448835	13460642	-	inside	1443	1057	NearestLocation	2.18079	13.1477	15.5407	WBGene00004116	pqn-27
X1668	chrII	13460280	13460637	358	*	358	13448835	13460642	-	inside	362	5	NearestLocation	1.65934	13.3564	15.756	WBGene00004116	pqn-27
X1669	chrII	13461178	13461455	278	*	278	13461755	13461864	-	downstream	686	300	NearestLocation	1.94079	14.8614	17.3663	WBGene00219226	mir-4929
X1670	chrII	13462664	13462921	258	*	258	13461755	13461864	-	upstream	-800	800	NearestLocation	1.56266	2.09848	3.6251	WBGene00219226	mir-4929
X1671	chrII	13464441	13465137	697	*	697	13461755	13461864	-	upstream	-2577	2577	NearestLocation	2.04567	8.274	10.2962	WBGene00219226	mir-4929
X1672	chrII	13468379	13469062	684	*	684	13460991	13469602	-	inside	1223	540	NearestLocation	1.60071	2.35201	3.90032	WBGene00008446	E01G4.3
X1673	chrII	13469877	13470766	890	*	890	13460991	13469602	-	upstream	-275	275	NearestLocation	1.73501	3.90974	5.59868	WBGene00008446	E01G4.3
X1674	chrII	13493215	13493535	321	*	321	13491803	13493048	-	upstream	-167	167	NearestLocation	1.87838	12.5142	14.8429	WBGene00009739	F45H10.2
X1675	chrII	13494260	13494595	336	*	336	13493181	13494600	-	inside	340	5	NearestLocation	1.47932	9.00384	11.0713	WBGene00009740	F45H10.3
X1676	chrII	13495218	13495669	452	*	452	13495049	13495896	-	inside	678	169	NearestLocation	1.76285	5.46007	7.26929	WBGene00009741	drr-1
X1677	chrII	13502132	13502575	444	*	444	13501877	13503825	+	inside	255	255	NearestLocation	1.35932	2.8327	4.42413	WBGene00009742	F45H10.5
X1678	chrII	13504644	13504903	260	*	260	13504082	13506905	+	inside	562	562	NearestLocation	1.7817	11.5147	13.7675	WBGene00010069	F54F11.1
X1679	chrII	13505805	13506306	502	*	502	13507819	13516481	+	upstream	-2014	1513	NearestLocation	1.64203	4.77373	6.51768	WBGene00010070	nep-17
X1680	chrII	13509444	13509699	256	*	256	13507819	13516481	+	inside	1625	1625	NearestLocation	1.50975	7.70678	9.69123	WBGene00010070	nep-17
X1681	chrII	13510280	13510540	261	*	261	13511430	13511516	+	upstream	-1150	890	NearestLocation	1.63269	6.60074	8.50613	WBGene00199747	F54F11.5
X1682	chrII	13574534	13574888	355	*	355	13568082	13575063	-	inside	529	175	NearestLocation	1.44715	6.60727	8.49556	WBGene00013004	mrpl-37
X1683	chrII	13575626	13575881	256	*	256	13575730	13584732	+	overlapStart	-104	104	NearestLocation	1.41623	6.38221	8.26085	WBGene00013006	lin-38
X1684	chrII	13593046	13593455	410	*	410	13590559	13593797	-	inside	751	342	NearestLocation	1.31757	2.95953	4.56506	WBGene00013008	clec-146
X1685	chrII	13610861	13611364	504	*	504	13610443	13611342	-	overlapStart	481	22	NearestLocation	1.73224	6.61448	8.50841	WBGene00001772	gst-24
X1686	chrII	13633672	13633923	252	*	252	13632655	13636982	+	inside	1017	1017	NearestLocation	1.76116	6.13114	7.99935	WBGene00006404	tag-10
X1687	chrII	13638202	13638462	261	*	261	13636983	13638480	-	inside	278	18	NearestLocation	1.4096	7.77218	9.74863	WBGene00007836	C31C9.2
X1688	chrII	13658796	13659057	262	*	262	13655884	13662081	-	inside	3285	2912	NearestLocation	2.10262	18.8627	21.6889	WBGene00007840	C31C9.6
X1689	chrII	13663703	13664201	499	*	499	13655884	13662081	-	upstream	-1622	1622	NearestLocation	1.54864	1.76338	3.25203	WBGene00007840	C31C9.6
X1690	chrII	13668888	13669177	290	*	290	13669104	13669713	+	overlapStart	-216	73	NearestLocation	1.37909	5.77037	7.59906	WBGene00007841	C31C9.7
X1691	chrII	13670720	13671108	389	*	389	13669104	13669713	+	downstream	1616	1007	NearestLocation	1.81621	17.7455	20.4851	WBGene00007841	C31C9.7
X1692	chrII	13672295	13673134	840	*	840	13669104	13669713	+	downstream	3191	2582	NearestLocation	1.80096	5.24034	7.03379	WBGene00007841	C31C9.7
X1693	chrII	13673951	13674271	321	*	321	13669104	13669713	+	downstream	4847	4238	NearestLocation	2.12332	18.9386	21.7728	WBGene00007841	C31C9.7
X1694	chrII	13674705	13675023	319	*	319	13669104	13669713	+	downstream	5601	4992	NearestLocation	1.66737	2.6864	4.27277	WBGene00007841	C31C9.7
X1695	chrII	13676917	13677196	280	*	280	13669104	13669713	+	downstream	7813	7204	NearestLocation	1.91477	4.96042	6.73676	WBGene00007841	C31C9.7
X1696	chrII	13678649	13678899	251	*	251	13669104	13669713	+	downstream	9545	8936	NearestLocation	1.85202	4.67818	6.43066	WBGene00007841	C31C9.7
X1697	chrII	13679222	13679600	379	*	379	13669104	13669713	+	downstream	10118	9509	NearestLocation	1.57748	1.8865	3.38716	WBGene00007841	C31C9.7
X1698	chrII	13692720	13693072	353	*	353	13670637	13694781	-	inside	2061	1709	NearestLocation	1.24396	2.02473	3.54219	WBGene00012999	rpoa-1
X1699	chrII	13693881	13694385	505	*	505	13670637	13694781	-	inside	900	396	NearestLocation	1.30714	3.07349	4.68891	WBGene00012999	rpoa-1
X1700	chrII	13708704	13708964	261	*	261	13703877	13712898	+	inside	4827	3934	NearestLocation	1.65709	7.38895	9.35084	WBGene00002235	kqt-3
X1701	chrII	13709562	13710154	593	*	593	13714202	13714262	+	upstream	-4640	4048	NearestLocation	1.60482	5.60295	7.4261	WBGene00195996	Y54G9A.11
X1702	chrII	13711284	13711827	544	*	544	13714202	13714262	+	upstream	-2918	2375	NearestLocation	1.43665	5.83144	7.66754	WBGene00195996	Y54G9A.11
X1703	chrII	13715313	13715638	326	*	326	13713019	13715872	-	inside	559	234	NearestLocation	1.58395	3.67542	5.34038	WBGene00013207	Y54G9A.4
X1704	chrII	13726008	13726293	286	*	286	13726062	13729610	+	overlapStart	-54	54	NearestLocation	1.52271	8.01696	10.0188	WBGene00013209	bub-3
X1705	chrII	13734605	13734926	322	*	322	13734716	13734905	+	includeFeature	-111	21	NearestLocation	1.52368	6.14813	8.01726	WBGene00196080	Y54G9A.12
X1705	chrII	13734605	13734926	322	*	322	13734716	13734905	-	includeFeature	300	21	NearestLocation	1.52368	6.14813	8.01726	WBGene00196823	Y54G9A.13
X1706	chrII	13735246	13735717	472	*	472	13734716	13734905	-	upstream	-341	341	NearestLocation	1.36325	4.02199	5.71248	WBGene00196823	Y54G9A.13
X1707	chrII	13736283	13736877	595	*	595	13736349	13736933	+	overlapStart	-66	56	NearestLocation	1.49954	7.57726	9.5452	WBGene00011056	R06B9.5
X1708	chrII	13738304	13738552	249	*	249	13736349	13736933	+	downstream	1955	1371	NearestLocation	1.60348	10.3102	12.4753	WBGene00011056	R06B9.5
X1709	chrII	13751801	13752109	309	*	309	13752320	13756257	+	upstream	-519	211	NearestLocation	2.02117	6.23885	8.11181	WBGene00011055	arrd-14
X1710	chrII	13753799	13754064	266	*	266	13752320	13756257	+	inside	1479	1479	NearestLocation	1.76973	7.93801	9.93881	WBGene00011055	arrd-14
X1711	chrII	13756936	13757443	508	*	508	13758414	13761227	+	upstream	-1478	971	NearestLocation	1.58135	1.8889	3.39378	WBGene00011054	arrd-13
X1712	chrII	13770157	13770469	313	*	313	13771026	13771320	+	upstream	-869	557	NearestLocation	1.67069	3.22956	4.84908	WBGene00206391	C01B9.7
X1713	chrII	13788559	13789031	473	*	473	13788897	13789046	-	overlapEnd	487	15	NearestLocation	1.50371	8.13099	10.1263	WBGene00200813	C01B9.6
X1714	chrII	13790846	13791095	250	*	250	13792229	13817374	+	upstream	-1383	1134	NearestLocation	1.60177	7.66453	9.65121	WBGene00013934	ZK131.11
X1715	chrII	13795226	13795499	274	*	274	13792229	13817374	+	inside	2997	2997	NearestLocation	1.45681	8.16345	10.1686	WBGene00013934	ZK131.11
X1716	chrII	13813176	13813882	707	*	707	13817993	13818142	+	upstream	-4817	4111	NearestLocation	1.77075	14.1915	16.6511	WBGene00201623	ZK131.14
X1717	chrII	13814453	13815315	863	*	863	13817993	13818142	+	upstream	-3540	2678	NearestLocation	1.68214	9.95325	12.09	WBGene00201623	ZK131.14
X1718	chrII	13815876	13816559	684	*	684	13817993	13818142	+	upstream	-2117	1434	NearestLocation	1.74141	9.56895	11.6835	WBGene00201623	ZK131.14
X1719	chrII	13833096	13833352	257	*	257	13832853	13833631	-	inside	535	243	NearestLocation	1.74606	11.0462	13.2665	WBGene00008577	F08G2.5
X1720	chrII	13835066	13835333	268	*	268	13834887	13834954	-	upstream	-112	112	NearestLocation	1.5817	8.46292	10.5004	WBGene00044973	F08G2.12
X1721	chrII	13845626	13845983	358	*	358	13847490	13847578	+	upstream	-1864	1507	NearestLocation	1.38231	1.15194	2.56268	WBGene00197500	F08G2.14
X1722	chrII	13849152	13849401	250	*	250	13847490	13847578	-	upstream	-1574	1574	NearestLocation	1.98677	8.1733	10.183	WBGene00198550	F08G2.16
X1723	chrII	13858321	13858790	470	*	470	13852787	13852972	+	downstream	5534	5349	NearestLocation	1.31245	2.89521	4.49153	WBGene00014312	F08G2.11
X1724	chrII	13859843	13860202	360	*	360	13852787	13852972	+	downstream	7056	6871	NearestLocation	1.445	1.72394	3.20863	WBGene00014312	F08G2.11
X1725	chrII	13862664	13862927	264	*	264	13855785	13872294	-	inside	9630	6879	NearestLocation	1.84863	11.4428	13.6919	WBGene00013093	Y51H1A.2
X1726	chrII	13863735	13864050	316	*	316	13855785	13872294	-	inside	8559	7950	NearestLocation	1.94868	10.2746	12.4396	WBGene00013093	Y51H1A.2
X1727	chrII	13871811	13872375	565	*	565	13855785	13872294	-	overlapStart	483	81	NearestLocation	1.53957	2.13411	3.66286	WBGene00013093	Y51H1A.2
X1728	chrII	13872916	13873407	492	*	492	13872869	13875423	+	inside	47	47	NearestLocation	1.35123	5.2057	7.0091	WBGene00013094	Y51H1A.3
X1729	chrII	13887275	13887875	601	*	601	13888658	13898576	+	upstream	-1383	783	NearestLocation	1.55918	7.55466	9.52186	WBGene00013096	mcd-1
X1730	chrII	13900301	13900552	252	*	252	13898416	13902116	-	inside	1815	1564	NearestLocation	1.88226	6.20342	8.07687	WBGene00012197	W02B8.1
X1731	chrII	13945419	13945695	277	*	277	13944283	13944476	+	downstream	1136	943	NearestLocation	1.88873	9.81825	11.9477	WBGene00200764	W07G1.19
X1732	chrII	13951390	13951653	264	*	264	13951422	13951608	+	includeFeature	-32	32	NearestLocation	1.81058	9.77807	11.9137	WBGene00014549	W07G1.8
X1733	chrII	13952031	13952290	260	*	260	13951422	13951608	+	downstream	609	423	NearestLocation	1.41272	7.07201	8.99484	WBGene00014549	W07G1.8
X1734	chrII	13953972	13954247	276	*	276	13951422	13951608	+	downstream	2550	2364	NearestLocation	1.69117	14.3327	16.8009	WBGene00014549	W07G1.8
X1735	chrII	13955318	13955675	358	*	358	13951905	13957523	-	inside	2205	1848	NearestLocation	1.64613	3.48268	5.13796	WBGene00012330	zip-3
X1736	chrII	13964533	13964782	250	*	250	13964558	13964621	+	includeFeature	-25	25	NearestLocation	1.58	9.26591	11.3591	WBGene00201738	W07G1.21
X1737	chrII	13982351	13982631	281	*	281	13982050	13983011	-	inside	660	301	NearestLocation	1.56718	6.94249	8.86009	WBGene00012729	Y39G8B.10
X1738	chrII	13983804	13984051	248	*	248	13983397	13984651	-	inside	847	407	NearestLocation	1.64884	6.01392	7.8769	WBGene00012725	sre-47
X1739	chrII	13984791	13985202	412	*	412	13983397	13984651	-	upstream	-140	140	NearestLocation	1.42058	1.72243	3.20602	WBGene00012725	sre-47
X1740	chrII	14013198	14013444	247	*	247	14010722	14013824	+	inside	2476	380	NearestLocation	1.76881	5.45844	7.27618	WBGene00008498	F01D5.8
X1741	chrII	14034401	14034983	583	*	583	14032494	14032568	-	upstream	-1833	1833	NearestLocation	1.26341	2.51493	4.07996	WBGene00200564	W01G7.6
X1742	chrII	14035283	14035548	266	*	266	14033233	14037721	-	inside	2438	2050	NearestLocation	1.51634	9.02641	11.102	WBGene00000901	daf-5
X1743	chrII	14036036	14036284	249	*	249	14033233	14037721	-	inside	1685	1437	NearestLocation	1.47535	8.22537	10.2423	WBGene00000901	daf-5
X1744	chrII	14037453	14038091	639	*	639	14033233	14037721	-	overlapStart	268	268	NearestLocation	1.4613	7.77106	9.74745	WBGene00000901	daf-5
X1745	chrII	14041457	14041836	380	*	380	14033233	14037721	-	upstream	-3736	3736	NearestLocation	2.03171	17.6223	20.3525	WBGene00000901	daf-5
X1746	chrII	14043584	14044583	1000	*	1000	14033233	14037721	-	upstream	-5863	5863	NearestLocation	1.59746	6.42943	8.30527	WBGene00000901	daf-5
X1747	chrII	14045361	14045846	486	*	486	14033233	14037721	-	upstream	-7640	7640	NearestLocation	1.81859	14.923	17.4377	WBGene00000901	daf-5
X1748	chrII	14046544	14046821	278	*	278	14033233	14037721	-	upstream	-8823	8823	NearestLocation	1.62457	8.31686	10.3376	WBGene00000901	daf-5
X1749	chrII	14049726	14049972	247	*	247	14059838	14060622	+	upstream	-10112	9866	NearestLocation	1.70494	4.12478	5.83702	WBGene00012187	rpb-11
X1750	chrII	14051760	14052144	385	*	385	14059838	14060622	+	upstream	-8078	7694	NearestLocation	1.54115	3.264	4.89335	WBGene00012187	rpb-11
X1751	chrII	14053335	14053831	497	*	497	14059838	14060622	+	upstream	-6503	6007	NearestLocation	1.63579	3.47104	5.10774	WBGene00012187	rpb-11
X1752	chrII	14058790	14059091	302	*	302	14059838	14060622	+	upstream	-1048	747	NearestLocation	1.52271	9.35047	11.4509	WBGene00012187	rpb-11
X1753	chrII	14059459	14059747	289	*	289	14059838	14060622	+	upstream	-379	91	NearestLocation	1.72869	14.2345	16.6952	WBGene00012187	rpb-11
X1754	chrII	14064442	14064688	247	*	247	14063450	14065904	+	inside	992	992	NearestLocation	1.37016	2.42014	3.97821	WBGene00002275	lem-2
X1755	chrII	14065485	14065731	247	*	247	14063450	14065904	+	inside	2035	173	NearestLocation	1.31276	3.16469	4.78979	WBGene00002275	lem-2
X1756	chrII	14111372	14111667	296	*	296	14108127	14109221	-	upstream	-2151	2151	NearestLocation	1.86944	11.6067	13.8678	WBGene00010723	cpg-7
X1757	chrII	14112527	14112790	264	*	264	14108127	14109221	-	upstream	-3306	3306	NearestLocation	1.57025	10.1947	12.353	WBGene00010723	cpg-7
X1758	chrII	14137850	14138117	268	*	268	14137830	14140069	+	inside	20	20	NearestLocation	1.33876	3.26561	4.90718	WBGene00010719	K09E4.1
X1759	chrII	14142874	14143139	266	*	266	14133397	14142197	-	upstream	-677	677	NearestLocation	1.62015	9.15552	11.2425	WBGene00012230	cacn-1
X1760	chrII	14143458	14143709	252	*	252	14142949	14143845	-	inside	387	136	NearestLocation	1.56366	5.34773	7.15572	WBGene00012228	W03H9.2
X1761	chrII	14153371	14153652	282	*	282	14151049	14154373	-	inside	1002	721	NearestLocation	1.38409	5.25771	7.05058	WBGene00012978	Y48B6A.1
X1762	chrII	14155277	14155530	254	*	254	14155280	14155686	+	overlapStart	-3	3	NearestLocation	1.57687	11.8151	14.0956	WBGene00004456	rpl-43
X1763	chrII	14185480	14185752	273	*	273	14191477	14191607	+	upstream	-5997	5725	NearestLocation	1.7744	3.88047	5.57265	WBGene00197867	Y48B6A.19
X1764	chrII	14243340	14243612	273	*	273	14234973	14243590	-	overlapStart	250	22	NearestLocation	1.75894	7.13431	9.07783	WBGene00012982	jmjd-2
X1765	chrII	14248166	14248455	290	*	290	14249642	14249789	-	downstream	1623	1187	NearestLocation	1.46406	8.76982	10.8257	WBGene00201670	Y48B6A.23
X1766	chrII	14249304	14249874	571	*	571	14249642	14249789	-	includeFeature	485	85	NearestLocation	1.32762	4.22757	5.9375	WBGene00201670	Y48B6A.23
X1767	chrII	14291984	14292278	295	*	295	14292824	14296055	+	upstream	-840	546	NearestLocation	1.73618	3.60908	5.27811	WBGene00013215	Y54G11A.4
X1768	chrII	14293557	14293874	318	*	318	14292824	14296055	+	inside	733	733	NearestLocation	1.69139	8.06195	10.0566	WBGene00013215	Y54G11A.4
X1769	chrII	14295229	14295649	421	*	421	14297297	14299843	+	upstream	-2068	1648	NearestLocation	1.80637	8.40978	10.4341	WBGene00013216	Y54G11A.7
X1770	chrII	14296055	14296308	254	*	254	14297297	14299843	+	upstream	-1242	989	NearestLocation	1.67678	3.26912	4.90109	WBGene00013216	Y54G11A.7
X1771	chrII	14297285	14297791	507	*	507	14297297	14299843	+	overlapStart	-12	12	NearestLocation	1.80046	7.22028	9.15401	WBGene00013216	Y54G11A.7
X1772	chrII	14298243	14298507	265	*	265	14297297	14299843	+	inside	946	946	NearestLocation	1.81646	4.72518	6.48471	WBGene00013216	Y54G11A.7
X1773	chrII	14299153	14299564	412	*	412	14297297	14299843	+	inside	1856	279	NearestLocation	1.88687	12.0906	14.3975	WBGene00013216	Y54G11A.7
X1774	chrII	14337679	14338090	412	*	412	14340006	14344454	-	downstream	6775	1916	NearestLocation	1.32668	1.72955	3.21479	WBGene00013217	ddl-3
X1775	chrII	14349075	14349398	324	*	324	14348892	14349406	-	inside	331	8	NearestLocation	1.6081	2.81715	4.4147	WBGene00185067	Y54G11A.17
X1776	chrII	14366089	14366335	247	*	247	14365705	14373870	+	inside	384	384	NearestLocation	1.87074	6.10443	7.96773	WBGene00002076	imb-2
X1777	chrII	14386516	14387046	531	*	531	14388513	14388824	+	upstream	-1997	1467	NearestLocation	1.58701	3.92927	5.62071	WBGene00195149	F26H11.8
X1778	chrII	14390120	14390366	247	*	247	14389235	14390078	-	upstream	-42	42	NearestLocation	1.61329	5.39288	7.2067	WBGene00009179	kbp-3
X1779	chrII	14390704	14391033	330	*	330	14390720	14407905	+	overlapStart	-16	16	NearestLocation	1.97701	6.28435	8.15475	WBGene00009180	nurf-1
X1780	chrII	14399166	14399454	289	*	289	14399565	14399629	-	downstream	463	111	NearestLocation	1.49434	6.53908	8.43226	WBGene00195007	mir-5595
X1781	chrII	14400001	14400530	530	*	530	14399565	14399629	-	upstream	-372	372	NearestLocation	1.40635	6.92238	8.84914	WBGene00195007	mir-5595
X1782	chrII	14405295	14405730	436	*	436	14408751	14410809	+	upstream	-3456	3021	NearestLocation	1.56699	10.3173	12.4789	WBGene00009182	F26H11.4
X1783	chrII	14416549	14416795	247	*	247	14412197	14413465	-	upstream	-3084	3084	NearestLocation	1.8803	4.88339	6.64579	WBGene00001371	exl-1
X1784	chrII	14417491	14417781	291	*	291	14412197	14413465	-	upstream	-4026	4026	NearestLocation	1.74355	14.202	16.6556	WBGene00001371	exl-1
X1785	chrII	14464553	14464820	268	*	268	14466274	14466350	+	upstream	-1721	1454	NearestLocation	2.01542	9.56692	11.6818	WBGene00198974	C13B4.6
X1786	chrII	14470668	14470931	264	*	264	14474825	14474920	+	upstream	-4157	3894	NearestLocation	1.75609	6.70265	8.61223	WBGene00197886	C13B4.5
X1787	chrII	14482107	14482364	258	*	258	14483493	14483513	-	downstream	1406	1129	NearestLocation	1.57904	8.53854	10.5875	WBGene00171718	21ur-11165
X1788	chrII	14485873	14486128	256	*	256	14483493	14483513	-	upstream	-2360	2360	NearestLocation	1.78389	4.17037	5.88519	WBGene00171718	21ur-11165
X1789	chrII	14488212	14488935	724	*	724	14485624	14488688	-	overlapStart	476	247	NearestLocation	1.55212	5.55909	7.3631	WBGene00006856	usp-14
X1790	chrII	14491665	14491954	290	*	290	14489802	14492900	+	inside	1863	946	NearestLocation	1.80617	10.0214	12.1693	WBGene00010758	vnut-1
X1791	chrII	14494099	14494394	296	*	296	14492827	14494514	-	inside	415	120	NearestLocation	1.5637	5.88871	7.73946	WBGene00010759	cysl-2
X1792	chrII	14502288	14502550	263	*	263	14501747	14502543	+	overlapEnd	541	7	NearestLocation	1.72694	6.07754	7.93967	WBGene00010761	K10H10.5
X1793	chrII	14507231	14507501	271	*	271	14507092	14507636	-	inside	405	135	NearestLocation	1.82755	8.65222	10.7061	WBGene00010763	K10H10.7
X1794	chrII	14526305	14526603	299	*	299	14525312	14526033	+	downstream	993	272	NearestLocation	2.31529	11.6304	13.8944	WBGene00010196	F57C2.4
X1795	chrII	14527638	14528133	496	*	496	14526212	14528296	-	inside	658	163	NearestLocation	2.3735	14.3094	16.78	WBGene00010197	F57C2.5
X1796	chrII	14530282	14530543	262	*	262	14528754	14534115	+	inside	1528	1528	NearestLocation	2.21565	10.4018	12.5768	WBGene00010198	spat-1
X1797	chrII	14533069	14533369	301	*	301	14534298	14535266	+	upstream	-1229	929	NearestLocation	1.53382	8.5433	10.5812	WBGene00007312	C04H5.1
X1798	chrII	14560207	14560805	599	*	599	14552505	14561596	-	inside	1389	791	NearestLocation	1.55297	4.12474	5.83531	WBGene00003392	mog-4
X1799	chrII	14561270	14561606	337	*	337	14552505	14561596	-	overlapStart	326	10	NearestLocation	1.41189	6.1396	8.00506	WBGene00003392	mog-4
X1800	chrII	14563817	14564087	271	*	271	14562214	14564011	-	overlapStart	194	76	NearestLocation	1.86489	13.1564	15.5487	WBGene00044053	C01G12.12
X1801	chrII	14566399	14566647	249	*	249	14562214	14564011	-	upstream	-2388	2388	NearestLocation	1.78428	6.53878	8.42044	WBGene00044053	C01G12.12
X1802	chrII	14567916	14568223	308	*	308	14571840	14571925	+	upstream	-3924	3617	NearestLocation	1.9476	9.85539	11.9911	WBGene00201201	C01G12.14
X1803	chrII	14568541	14568877	337	*	337	14571840	14571925	+	upstream	-3299	2963	NearestLocation	1.83376	18.2859	21.0702	WBGene00201201	C01G12.14
X1804	chrII	14569390	14569715	326	*	326	14571840	14571925	+	upstream	-2450	2125	NearestLocation	1.499	9.22631	11.3142	WBGene00201201	C01G12.14
X1805	chrII	14571605	14571977	373	*	373	14571840	14571925	+	includeFeature	-235	52	NearestLocation	2.12314	12.3147	14.629	WBGene00201201	C01G12.14
X1806	chrII	14597867	14598400	534	*	534	14600902	14610551	+	upstream	-3035	2502	NearestLocation	1.70675	3.09656	4.71001	WBGene00006603	tps-2
X1807	chrII	14610186	14610434	249	*	249	14607212	14608051	+	downstream	2974	2135	NearestLocation	1.74103	5.80759	7.6528	WBGene00000188	arl-3
X1808	chrII	14636011	14636263	253	*	253	14635795	14636093	-	overlapStart	82	82	NearestLocation	1.4221	2.17629	3.70623	WBGene00045388	C38C6.8
X1809	chrII	14651409	14651693	285	*	285	14640096	14644085	-	upstream	-7324	7324	NearestLocation	1.74041	5.32141	7.13065	WBGene00000225	atgp-2
X1810	chrII	14664723	14665039	317	*	317	14647327	14666943	-	inside	2220	1904	NearestLocation	1.38298	6.17545	8.03806	WBGene00006787	unc-52
X1811	chrII	14665666	14665915	250	*	250	14647327	14666943	-	inside	1277	1028	NearestLocation	1.58745	9.45116	11.5551	WBGene00006787	unc-52
X1812	chrII	14666700	14666975	276	*	276	14647327	14666943	-	overlapStart	243	32	NearestLocation	1.63154	9.21644	11.3	WBGene00006787	unc-52
X1813	chrII	14675466	14675722	257	*	257	14678468	14681152	+	upstream	-3002	2746	NearestLocation	1.58671	8.9949	11.0654	WBGene00013852	hhat-1
X1814	chrII	14726397	14726679	283	*	283	14724821	14724969	+	downstream	1576	1428	NearestLocation	2.23944	12.4415	14.7683	WBGene00195525	C09F9.8
X1815	chrII	14728779	14729778	1000	*	1000	14720552	14733524	-	inside	4745	3746	NearestLocation	1.71449	2.97958	4.59278	WBGene00007480	glna-1
X1816	chrII	14734433	14734726	294	*	294	14720552	14733524	-	upstream	-909	909	NearestLocation	1.61014	2.61941	4.19494	WBGene00007480	glna-1
X1817	chrII	14752258	14752512	255	*	255	14747273	14752489	-	overlapStart	231	23	NearestLocation	1.38247	5.57679	7.39669	WBGene00013188	smg-9
X1818	chrII	14756822	14757434	613	*	613	14755979	14757811	-	inside	989	377	NearestLocation	1.40445	4.20783	5.92465	WBGene00013190	Y54E2A.5
X1819	chrII	14760418	14760817	400	*	400	14755979	14757811	-	upstream	-2607	2607	NearestLocation	1.43366	3.21054	4.83637	WBGene00013190	Y54E2A.5
X1820	chrII	14783467	14783723	257	*	257	14785176	14786003	-	downstream	2536	1453	NearestLocation	1.70102	8.34805	10.3761	WBGene00013194	Y54E2A.9
X1821	chrII	14789656	14789939	284	*	284	14791101	14792596	+	upstream	-1445	1162	NearestLocation	2.05859	9.05913	11.1293	WBGene00013195	Y54E2A.10
X1822	chrII	14791257	14791542	286	*	286	14791101	14792596	+	inside	156	156	NearestLocation	1.75084	3.6332	5.30161	WBGene00013195	Y54E2A.10
X1823	chrII	14791994	14792398	405	*	405	14791101	14792596	+	inside	893	198	NearestLocation	1.41908	5.72785	7.55122	WBGene00013195	Y54E2A.10
X1824	chrII	14796394	14797900	1507	*	1507	14798472	14800930	+	upstream	-2078	572	NearestLocation	1.6431	7.67588	9.63934	WBGene00013196	tbc-20
X1825	chrII	14798752	14799006	255	*	255	14798472	14800930	+	inside	280	280	NearestLocation	1.66579	4.44118	6.18193	WBGene00013196	tbc-20
X1826	chrII	14799467	14799757	291	*	291	14798472	14800930	+	inside	995	995	NearestLocation	1.57206	8.51317	10.5502	WBGene00013196	tbc-20
X1827	chrII	14811119	14812326	1208	*	1208	14812567	14814892	+	upstream	-1448	241	NearestLocation	1.76907	7.93115	9.9218	WBGene00012182	osta-3
X1828	chrII	14813732	14814713	982	*	982	14815518	14816212	+	upstream	-1786	805	NearestLocation	1.76781	7.11007	9.03892	WBGene00012179	W01D2.1
X1829	chrII	14815463	14815824	362	*	362	14815518	14816212	+	overlapStart	-55	55	NearestLocation	1.9601	17.4536	20.1599	WBGene00012179	W01D2.1
X1830	chrII	14816903	14817499	597	*	597	14815518	14816212	+	downstream	1385	691	NearestLocation	1.54913	8.78054	10.8382	WBGene00012179	W01D2.1
X1831	chrII	14818276	14818591	316	*	316	14815518	14816212	+	downstream	2758	2064	NearestLocation	1.53246	10.655	12.8459	WBGene00012179	W01D2.1
X1832	chrII	14819677	14820018	342	*	342	14815518	14816212	+	downstream	4159	3465	NearestLocation	1.75467	6.99672	8.91673	WBGene00012179	W01D2.1
X1833	chrII	14824912	14825361	450	*	450	14815518	14816212	+	downstream	9394	8700	NearestLocation	1.6885	2.91225	4.51142	WBGene00012179	W01D2.1
X1834	chrII	14835146	14835612	467	*	467	14816147	14840005	-	inside	4859	4393	NearestLocation	1.79093	5.73834	7.57734	WBGene00003651	nhr-61
X1835	chrII	14851204	14851596	393	*	393	14852430	14853627	+	upstream	-1226	834	NearestLocation	1.77038	4.91897	6.69415	WBGene00011042	R05H10.1
X1836	chrII	14856986	14857232	247	*	247	14857190	14866588	+	overlapStart	-204	42	NearestLocation	1.48096	8.45569	10.4924	WBGene00011043	rbm-28
X1837	chrII	14857661	14857926	266	*	266	14857190	14866588	+	inside	471	471	NearestLocation	1.46164	6.77316	8.68259	WBGene00011043	rbm-28
X1838	chrII	14904714	14904979	266	*	266	14903335	14903393	-	upstream	-1321	1321	NearestLocation	1.42699	3.71659	5.38466	WBGene00201367	R03C1.6
X1839	chrII	14930077	14930358	282	*	282	14919705	14953312	+	inside	10372	10372	NearestLocation	2.25717	12.3973	14.7173	WBGene00008443	pde-3
X1840	chrII	14932918	14933173	256	*	256	14919705	14953312	+	inside	13213	13213	NearestLocation	1.86112	5.81258	7.65726	WBGene00008443	pde-3
X1841	chrII	14944478	14944754	277	*	277	14946422	14946475	+	upstream	-1944	1668	NearestLocation	1.68693	8.76337	10.8206	WBGene00202428	E01F3.3
X1842	chrII	14946752	14947003	252	*	252	14947039	14947132	+	upstream	-287	36	NearestLocation	1.64054	9.22134	11.3156	WBGene00003366	mir-273
X1843	chrII	14962624	14962915	292	*	292	14959376	14964110	-	inside	1486	1195	NearestLocation	1.84076	4.21487	5.93071	WBGene00001247	elo-9
X1844	chrII	14966931	14967203	273	*	273	14968637	14969354	-	downstream	2423	1434	NearestLocation	1.53567	1.83123	3.32792	WBGene00013150	Y53F4B.3
X1845	chrII	14969143	14969395	253	*	253	14968637	14969354	-	overlapStart	211	41	NearestLocation	1.53143	7.3005	9.25304	WBGene00013150	Y53F4B.3
X1846	chrII	14969905	14970579	675	*	675	14969902	14971652	+	inside	3	3	NearestLocation	1.78961	5.46532	7.27988	WBGene00044720	Y53F4B.42
X1847	chrII	14971681	14972155	475	*	475	14969902	14971652	+	downstream	1779	29	NearestLocation	1.4683	3.73449	5.40926	WBGene00044720	Y53F4B.42
X1848	chrII	15008655	15008975	321	*	321	15004865	15010416	-	inside	1761	1441	NearestLocation	1.2666	1.75773	3.2456	WBGene00013156	Y53F4B.9
X1849	chrII	15009683	15010256	574	*	574	15004865	15010416	-	inside	733	160	NearestLocation	1.44076	6.3552	8.23537	WBGene00013156	Y53F4B.9
X1850	chrII	15024276	15024617	342	*	342	15025814	15025893	-	downstream	1617	1197	NearestLocation	2.03197	16.873	19.5416	WBGene00045141	Y53F4B.47
X1851	chrII	15042685	15043022	338	*	338	15042805	15044011	-	overlapEnd	1326	120	NearestLocation	2.15435	17.6132	20.3496	WBGene00044728	Y53F4B.45
X1852	chrII	15043622	15044503	882	*	882	15042805	15044011	-	overlapStart	389	389	NearestLocation	1.78304	8.03394	10.0229	WBGene00044728	Y53F4B.45
X1853	chrII	15044824	15045073	250	*	250	15042805	15044011	-	upstream	-813	813	NearestLocation	1.60161	2.40105	3.95896	WBGene00044728	Y53F4B.45
X1854	chrII	15072631	15073006	376	*	376	15064691	15071666	-	upstream	-965	965	NearestLocation	1.77244	10.5002	12.6773	WBGene00013164	Y53F4B.18
X1855	chrII	15073388	15074335	948	*	948	15064691	15071666	-	upstream	-1722	1722	NearestLocation	1.66359	3.50337	5.15173	WBGene00013164	Y53F4B.18
X1856	chrII	15075266	15075830	565	*	565	15077273	15079475	+	upstream	-2007	1443	NearestLocation	1.54411	1.89277	3.39493	WBGene00013165	Y53F4B.19
X1857	chrII	15089137	15089399	263	*	263	15090180	15109008	+	upstream	-1043	781	NearestLocation	1.39645	6.1084	7.97795	WBGene00013167	Y53F4B.21
X1858	chrII	15111956	15112362	407	*	407	15110144	15116319	+	inside	1812	1812	NearestLocation	1.87616	15.8056	18.3936	WBGene00013176	Y53F4B.39
X1859	chrII	15120224	15120696	473	*	473	15120301	15123346	+	overlapStart	-77	77	NearestLocation	1.44236	1.98267	3.49208	WBGene00013168	arp-1
X1860	chrII	15122772	15123052	281	*	281	15124517	15126350	+	upstream	-1745	1465	NearestLocation	1.98544	9.16031	11.247	WBGene00013169	Y53F4B.23
X1861	chrII	15145532	15145922	391	*	391	15145575	15145685	-	includeFeature	153	43	NearestLocation	1.43612	2.39331	3.94805	WBGene00197612	Y53F4B.56
X1862	chrII	15154291	15154580	290	*	290	15153812	15153832	-	upstream	-459	459	NearestLocation	1.81888	13.6081	16.0216	WBGene00171949	21ur-12457
X1863	chrII	15163093	15163353	261	*	261	15163808	15164584	-	downstream	1491	455	NearestLocation	1.595	5.02007	6.80345	WBGene00001774	gst-26
X1864	chrII	15173428	15174116	689	*	689	15174271	15174965	-	downstream	1537	155	NearestLocation	1.62576	2.33014	3.88274	WBGene00001779	gst-31
X1865	chrII	15189994	15190996	1003	*	1003	15183809	15185385	-	upstream	-4609	4609	NearestLocation	1.66728	3.41268	5.05182	WBGene00001783	gst-35
X1866	chrII	15191300	15191553	254	*	254	15196214	15198075	+	upstream	-4914	4661	NearestLocation	1.66456	2.57357	4.14754	WBGene00021598	Y46E12BR.1
X1867	chrII	15192126	15192622	497	*	497	15196214	15198075	+	upstream	-4088	3592	NearestLocation	1.44822	2.90464	4.50993	WBGene00021598	Y46E12BR.1
X1868	chrII	15192968	15193267	300	*	300	15196214	15198075	+	upstream	-3246	2947	NearestLocation	1.59899	2.16673	3.69982	WBGene00021598	Y46E12BR.1
X1869	chrII	15193539	15193810	272	*	272	15196214	15198075	+	upstream	-2675	2404	NearestLocation	1.64873	4.73368	6.48555	WBGene00021598	Y46E12BR.1
X1870	chrII	15194017	15194361	345	*	345	15196214	15198075	+	upstream	-2197	1853	NearestLocation	1.7171	13.1882	15.5674	WBGene00021598	Y46E12BR.1
X1871	chrII	15194564	15194968	405	*	405	15196214	15198075	+	upstream	-1650	1246	NearestLocation	1.98925	7.88683	9.87648	WBGene00021598	Y46E12BR.1
X1872	chrII	15195970	15196415	446	*	446	15196214	15198075	+	overlapStart	-244	201	NearestLocation	2.34074	13.0379	15.4096	WBGene00021598	Y46E12BR.1
X1873	chrII	15196764	15197339	576	*	576	15196214	15198075	+	inside	550	550	NearestLocation	1.6511	2.44655	4.00808	WBGene00021598	Y46E12BR.1
X1874	chrII	15201963	15202382	420	*	420	15206833	15206982	-	downstream	5019	4451	NearestLocation	1.53295	2.40798	3.96267	WBGene00201885	Y46E12BR.2
X1875	chrII	15203533	15204103	571	*	571	15206833	15206982	-	downstream	3449	2730	NearestLocation	1.51663	9.98614	12.1352	WBGene00201885	Y46E12BR.2
X1876	chrII	15204887	15205261	375	*	375	15206833	15206982	-	downstream	2095	1572	NearestLocation	1.69077	15.9851	18.5849	WBGene00201885	Y46E12BR.2
X1877	chrII	15206178	15206882	705	*	705	15206833	15206982	-	overlapEnd	804	49	NearestLocation	2.02866	20.0987	23.0205	WBGene00201885	Y46E12BR.2
X1878	chrII	15208198	15208706	509	*	509	15207443	15229509	+	inside	755	755	NearestLocation	1.59135	3.72621	5.39975	WBGene00021597	spsb-1
X1879	chrII	15209000	15209678	679	*	679	15207443	15229509	+	inside	1557	1557	NearestLocation	1.98739	12.5434	14.8734	WBGene00021597	spsb-1
X1880	chrII	15211601	15212692	1092	*	1092	15216569	15216638	+	upstream	-4968	3877	NearestLocation	1.70749	4.20412	5.91267	WBGene00220162	Y46E12BM.1
X1881	chrII	15213153	15213678	526	*	526	15216569	15216638	+	upstream	-3416	2891	NearestLocation	1.55422	2.48787	4.05116	WBGene00220162	Y46E12BM.1
X1882	chrII	15216396	15216678	283	*	283	15216569	15216638	+	includeFeature	-173	40	NearestLocation	1.6362	12.5516	14.8845	WBGene00220162	Y46E12BM.1
X1883	chrII	15218093	15218349	257	*	257	15216569	15216638	+	downstream	1524	1455	NearestLocation	1.42503	6.58423	8.48017	WBGene00220162	Y46E12BM.1
X1884	chrII	15218619	15218938	320	*	320	15216569	15216638	+	downstream	2050	1981	NearestLocation	1.62745	13.4103	15.8086	WBGene00220162	Y46E12BM.1
X1885	chrII	15220102	15220516	415	*	415	15216569	15216638	+	downstream	3533	3464	NearestLocation	1.29396	3.59727	5.25838	WBGene00220162	Y46E12BM.1
X1886	chrII	15226208	15226678	471	*	471	15228290	15228469	+	upstream	-2082	1612	NearestLocation	1.32391	2.98931	4.59568	WBGene00220161	Y46E12BL.11
X1887	chrII	15228172	15228431	260	*	260	15228290	15228469	+	overlapStart	-118	38	NearestLocation	1.56482	5.89823	7.75117	WBGene00220161	Y46E12BL.11
X1888	chrII	15230402	15230740	339	*	339	15230362	15232802	+	inside	40	40	NearestLocation	1.44087	2.20675	3.74042	WBGene00021596	spsb-2
X1889	chrII	15232277	15232532	256	*	256	15233153	15244959	+	upstream	-876	621	NearestLocation	1.39817	6.22216	8.09005	WBGene00021595	Y46E12BL.2
X1890	chrII	15232833	15233595	763	*	763	15233153	15244959	+	overlapStart	-320	320	NearestLocation	1.45173	7.61299	9.57537	WBGene00021595	Y46E12BL.2
X1891	chrII	15234168	15234467	300	*	300	15233153	15244959	+	inside	1015	1015	NearestLocation	1.69657	9.36058	11.4591	WBGene00021595	Y46E12BL.2
X1892	chrII	15235624	15235941	318	*	318	15233153	15244959	+	inside	2471	2471	NearestLocation	1.35757	4.94691	6.70879	WBGene00021595	Y46E12BL.2
X1893	chrII	15245013	15245268	256	*	256	15244855	15251498	-	inside	6485	158	NearestLocation	1.92851	7.73252	9.72071	WBGene00021594	tig-3
X1894	chrII	15255912	15256416	505	*	505	15255469	15255577	+	downstream	443	335	NearestLocation	1.4614	2.6057	4.18173	WBGene00199773	Y46E12BL.8
X1895	chrII	15258368	15258698	331	*	331	15257371	15259799	+	inside	997	997	NearestLocation	1.96119	19.8579	22.7689	WBGene00219753	linc-152
X1896	chrII	15261030	15261497	468	*	468	15263177	15263458	+	upstream	-2147	1680	NearestLocation	1.86704	15.4084	17.977	WBGene00201093	Y46E12BL.9
X1897	chrII	15263101	15263351	251	*	251	15263177	15263458	+	overlapStart	-76	76	NearestLocation	1.33517	3.78446	5.46946	WBGene00201093	Y46E12BL.9
X1898	chrII	15264655	15264919	265	*	265	15264825	15264885	+	includeFeature	-170	34	NearestLocation	1.36775	5.60432	7.43145	WBGene00201913	2RSSE.8
X1899	chrII	15266232	15266549	318	*	318	15265686	15265757	-	upstream	-475	475	NearestLocation	1.69588	12.8596	15.2173	WBGene00195865	2RSSE.4
X1900	chrII	15268250	15268560	311	*	311	15268212	15275689	+	inside	38	38	NearestLocation	1.47966	9.61213	11.7272	WBGene00007064	2RSSE.1
X1901	chrII	15269802	15270091	290	*	290	15268212	15275689	+	inside	1590	1590	NearestLocation	1.77178	13.5104	15.9125	WBGene00007064	2RSSE.1
X1902	chrII	15272961	15273344	384	*	384	15273617	15273693	+	upstream	-656	273	NearestLocation	1.34485	5.50953	7.3163	WBGene00199694	2RSSE.6
X1903	chrII	15274051	15274300	250	*	250	15273617	15273693	+	downstream	434	358	NearestLocation	1.49311	6.21923	8.09429	WBGene00199694	2RSSE.6
X1904	chrIII	6971	7226	256	*	256	3321	11940	+	inside	3650	3650	NearestLocation	1.84529	7.05487	8.99185	WBGene00019183	npr-30
X1905	chrIII	9483	9729	247	*	247	12166	14801	-	downstream	5318	2437	NearestLocation	1.67916	8.74077	10.7999	WBGene00003670	nhr-80
X1906	chrIII	12679	12930	252	*	252	12166	14801	-	inside	2122	513	NearestLocation	1.52008	8.56819	10.6127	WBGene00003670	nhr-80
X1907	chrIII	13242	13703	462	*	462	12166	14801	-	inside	1559	1076	NearestLocation	1.66147	6.0721	7.9177	WBGene00003670	nhr-80
X1908	chrIII	14211	14587	377	*	377	12166	14801	-	inside	590	214	NearestLocation	1.62162	13.6614	16.0825	WBGene00003670	nhr-80
X1909	chrIII	15020	15330	311	*	311	12166	14801	-	upstream	-219	219	NearestLocation	1.69726	17.5247	20.2507	WBGene00003670	nhr-80
X1910	chrIII	17609	18151	543	*	543	17316	19627	-	inside	2018	293	NearestLocation	1.48617	5.71924	7.55593	WBGene00019184	H10E21.4
X1911	chrIII	23110	23374	265	*	265	20527	23962	-	inside	852	588	NearestLocation	1.95033	9.97875	12.1208	WBGene00019185	H10E21.5
X1912	chrIII	28376	28702	327	*	327	20527	23962	-	upstream	-4414	4414	NearestLocation	2.01929	17.1136	19.7991	WBGene00019185	H10E21.5
X1913	chrIII	33297	33564	268	*	268	35454	39462	-	downstream	6165	1890	NearestLocation	1.54891	9.86737	11.9998	WBGene00021041	W05G11.4
X1914	chrIII	64786	65434	649	*	649	62887	66261	-	inside	1475	827	NearestLocation	1.48309	5.98208	7.83005	WBGene00021043	pck-1
X1915	chrIII	65797	66068	272	*	272	62887	66261	-	inside	464	193	NearestLocation	1.65527	12.9861	15.3563	WBGene00021043	pck-1
X1916	chrIII	67037	67374	338	*	338	62887	66261	-	upstream	-776	776	NearestLocation	1.53728	7.61647	9.58974	WBGene00021043	pck-1
X1917	chrIII	86368	86651	284	*	284	70442	86384	-	overlapStart	16	16	NearestLocation	1.45052	5.12503	6.91214	WBGene00018794	attf-3
X1918	chrIII	87837	88199	363	*	363	87561	89243	+	inside	276	276	NearestLocation	1.79928	6.23788	8.11308	WBGene00018793	mrpl-40
X1919	chrIII	122164	122414	251	*	251	121735	122020	-	upstream	-144	144	NearestLocation	1.87709	16.2126	18.8213	WBGene00016226	C29F9.12
X1920	chrIII	186954	187485	532	*	532	186945	188131	-	inside	1177	9	NearestLocation	1.5975	11.8523	14.1382	WBGene00003510	mxl-2
X1921	chrIII	187835	188276	442	*	442	186945	188131	-	overlapStart	296	145	NearestLocation	1.61224	15.3228	17.8773	WBGene00003510	mxl-2
X1922	chrIII	189126	189517	392	*	392	188838	190943	+	inside	288	288	NearestLocation	1.81177	14.8432	17.3446	WBGene00006715	ubc-20
X1923	chrIII	190322	190629	308	*	308	190984	191981	+	upstream	-662	355	NearestLocation	2.06448	13.8837	16.3152	WBGene00018240	cox-17
X1924	chrIII	190884	191171	288	*	288	190984	191981	+	overlapStart	-100	100	NearestLocation	1.92693	9.02595	11.1066	WBGene00018240	cox-17
X1925	chrIII	204089	204356	268	*	268	201279	207092	-	inside	3003	2736	NearestLocation	1.24595	2.54398	4.11189	WBGene00021124	W10C4.1
X1926	chrIII	218615	218863	249	*	249	221416	228838	+	upstream	-2801	2553	NearestLocation	1.70463	8.63522	10.684	WBGene00002230	klp-20
X1927	chrIII	234254	234518	265	*	265	235844	253376	+	upstream	-1590	1326	NearestLocation	1.92817	7.3336	9.28089	WBGene00021754	hpo-29
X1928	chrIII	234733	235480	748	*	748	235844	253376	+	upstream	-1111	364	NearestLocation	1.78189	9.98895	12.1294	WBGene00021754	hpo-29
X1929	chrIII	271455	271701	247	*	247	268458	282882	+	inside	2997	2997	NearestLocation	1.56483	6.99345	8.92035	WBGene00021752	xpd-1
X1930	chrIII	299586	300027	442	*	442	295647	298556	-	upstream	-1030	1030	NearestLocation	1.91183	11.7342	14.0059	WBGene00000081	ads-1
X1931	chrIII	345520	345794	275	*	275	335956	343241	-	upstream	-2279	2279	NearestLocation	1.27774	3.71597	5.3797	WBGene00021756	Y50D7A.8
X1932	chrIII	346928	347297	370	*	370	344299	348609	-	inside	1681	1312	NearestLocation	1.44712	8.48077	10.5083	WBGene00001561	gei-4
X1933	chrIII	352623	352946	324	*	324	352222	355402	+	inside	401	401	NearestLocation	1.43331	3.25834	4.89672	WBGene00219745	linc-90
X1934	chrIII	364703	364987	285	*	285	365949	377558	+	upstream	-1246	962	NearestLocation	2.32225	11.0501	13.2718	WBGene00004045	pll-1
X1935	chrIII	366866	367144	279	*	279	365949	377558	+	inside	917	917	NearestLocation	1.78756	9.38005	11.4817	WBGene00004045	pll-1
X1936	chrIII	424298	424557	260	*	260	429300	431752	+	upstream	-5002	4743	NearestLocation	2.33737	15.134	17.6701	WBGene00021913	cec-8
X1937	chrIII	457434	458012	579	*	579	453574	463718	-	inside	6284	3860	NearestLocation	1.55249	6.2835	8.15481	WBGene00044401	Y55B1BR.6
X1938	chrIII	464973	465229	257	*	257	453574	463718	-	upstream	-1255	1255	NearestLocation	1.91211	5.3354	7.14392	WBGene00044401	Y55B1BR.6
X1939	chrIII	470964	471215	252	*	252	464866	471695	-	inside	731	480	NearestLocation	1.66852	6.49725	8.39338	WBGene00021914	magu-1
X1940	chrIII	531718	532023	306	*	306	535382	535465	+	upstream	-3664	3359	NearestLocation	1.63092	12.028	14.3201	WBGene00023147	T22F7.t1
X1941	chrIII	534816	535106	291	*	291	535382	535465	+	upstream	-566	276	NearestLocation	1.75874	7.36631	9.32122	WBGene00023147	T22F7.t1
X1942	chrIII	536331	536627	297	*	297	535382	535465	+	downstream	949	866	NearestLocation	1.91492	11.7062	13.9866	WBGene00023147	T22F7.t1
X1943	chrIII	545778	546400	623	*	623	542066	546535	+	inside	3712	135	NearestLocation	1.65508	7.71546	9.70031	WBGene00020701	T22F7.1
X1944	chrIII	560668	561090	423	*	423	557518	572137	+	inside	3150	3150	NearestLocation	1.59519	2.22825	3.76447	WBGene00015155	B0353.1
X1945	chrIII	562013	562345	333	*	333	557518	572137	+	inside	4495	4495	NearestLocation	2.01221	6.96327	8.89155	WBGene00015155	B0353.1
X1946	chrIII	571338	571614	277	*	277	573984	576440	+	upstream	-2646	2370	NearestLocation	1.8266	4.94137	6.7246	WBGene00021903	Y55B1AL.1
X1947	chrIII	591952	592425	474	*	474	577694	587105	-	upstream	-4847	4847	NearestLocation	1.78783	4.91512	6.67837	WBGene00021905	helq-1
X1948	chrIII	595397	595846	450	*	450	587244	598117	-	inside	2720	2271	NearestLocation	1.33012	4.36392	6.07307	WBGene00021906	Y55B1AR.2
X1949	chrIII	597913	598502	590	*	590	587244	598117	-	overlapStart	204	204	NearestLocation	1.47931	2.97345	4.5796	WBGene00021906	Y55B1AR.2
X1950	chrIII	599787	600346	560	*	560	599509	600609	-	inside	822	263	NearestLocation	1.82206	6.20551	8.04585	WBGene00002269	lec-6
X1951	chrIII	601400	601723	324	*	324	599509	600609	-	upstream	-791	791	NearestLocation	1.8043	3.80688	5.49404	WBGene00002269	lec-6
X1952	chrIII	603651	603928	278	*	278	602708	603822	-	overlapStart	171	106	NearestLocation	1.76909	5.75449	7.59327	WBGene00021907	Y55B1AR.3
X1953	chrIII	613163	613443	281	*	281	610878	614549	-	inside	1386	1106	NearestLocation	1.70189	12.2368	14.5462	WBGene00020561	T19C3.3
X1954	chrIII	616674	616920	247	*	247	614707	617447	-	inside	773	527	NearestLocation	1.73791	3.17691	4.81143	WBGene00020560	T19C3.2
X1955	chrIII	625259	625511	253	*	253	623810	623915	-	upstream	-1344	1344	NearestLocation	1.7531	8.0631	10.06	WBGene00220072	T19C3.11
X1956	chrIII	633023	633478	456	*	456	632024	634626	-	inside	1603	999	NearestLocation	1.303	2.03614	3.55465	WBGene00001412	fem-2
X1957	chrIII	634169	634523	355	*	355	632024	634626	-	inside	457	103	NearestLocation	1.65711	3.13178	4.75648	WBGene00001412	fem-2
X1958	chrIII	634965	635213	249	*	249	632024	634626	-	upstream	-339	339	NearestLocation	1.70192	4.10804	5.82059	WBGene00001412	fem-2
X1959	chrIII	639104	639383	280	*	280	636480	638419	-	upstream	-685	685	NearestLocation	1.64271	11.4012	13.6499	WBGene00021063	sbds-1
X1960	chrIII	639993	640246	254	*	254	639090	640215	-	overlapStart	222	31	NearestLocation	1.59367	3.98662	5.68513	WBGene00044319	tag-266
X1961	chrIII	646736	647114	379	*	379	647126	654463	+	upstream	-390	12	NearestLocation	1.60288	2.78829	4.37649	WBGene00015648	orai-1
X1962	chrIII	652850	653468	619	*	619	658709	662734	+	upstream	-5859	5241	NearestLocation	1.83094	4.34574	6.05727	WBGene00015647	C09F5.1
X1963	chrIII	671071	671335	265	*	265	668098	668433	-	upstream	-2638	2638	NearestLocation	1.58294	7.56504	9.54227	WBGene00020923	W02B3.3
X1964	chrIII	671913	672266	354	*	354	675552	675665	+	upstream	-3639	3286	NearestLocation	2.07651	8.01658	10.0228	WBGene00196366	W02B3.8
X1965	chrIII	676040	676367	328	*	328	676122	680047	+	overlapStart	-82	82	NearestLocation	1.65564	12.2506	14.5587	WBGene00001709	grk-2
X1966	chrIII	735713	735959	247	*	247	740682	742974	+	upstream	-4969	4723	NearestLocation	1.76025	9.01505	11.0896	WBGene00020550	T17H7.1
X1967	chrIII	777746	778203	458	*	458	774323	778154	-	overlapStart	408	49	NearestLocation	1.65002	3.01614	4.63413	WBGene00000117	alh-11
X1968	chrIII	778823	779071	249	*	249	774323	778154	-	upstream	-669	669	NearestLocation	1.78951	3.65613	5.32997	WBGene00000117	alh-11
X1969	chrIII	786909	787169	261	*	261	783714	786071	+	downstream	3195	838	NearestLocation	2.20162	16.2291	18.8445	WBGene00018362	F42G9.1
X1970	chrIII	791438	791827	390	*	390	786102	793687	-	inside	2249	1860	NearestLocation	1.57405	9.05685	11.1264	WBGene00004922	snt-2
X1971	chrIII	792658	792971	314	*	314	786102	793687	-	inside	1029	716	NearestLocation	1.94543	11.4245	13.6717	WBGene00004922	snt-2
X1972	chrIII	793341	793840	500	*	500	786102	793687	-	overlapStart	346	153	NearestLocation	1.46366	6.05053	7.90427	WBGene00004922	snt-2
X1973	chrIII	794457	794747	291	*	291	794742	794867	+	overlapStart	-285	5	NearestLocation	1.69469	10.9448	13.1559	WBGene00044939	B0412.7
X1974	chrIII	828838	829154	317	*	317	828590	832277	-	inside	3439	248	NearestLocation	1.60974	10.1357	12.2925	WBGene00019329	ceeh-1
X1975	chrIII	830387	830874	488	*	488	828590	832277	-	inside	1890	1403	NearestLocation	1.84729	15.75	18.3435	WBGene00019329	ceeh-1
X1976	chrIII	834460	834765	306	*	306	833858	835814	+	inside	602	602	NearestLocation	1.47824	9.11764	11.2	WBGene00019327	zip-2
X1977	chrIII	844092	844384	293	*	293	842935	843803	+	downstream	1157	289	NearestLocation	1.69151	10.9289	13.1385	WBGene00001392	far-8
X1978	chrIII	886360	886796	437	*	437	881445	886789	-	overlapStart	429	7	NearestLocation	1.58911	2.6835	4.26145	WBGene00020762	zer-1
X1979	chrIII	900276	900531	256	*	256	900016	901444	-	inside	1168	260	NearestLocation	1.88264	9.15893	11.2433	WBGene00017759	sucl-2
X1980	chrIII	900954	901522	569	*	569	900016	901444	-	overlapStart	490	78	NearestLocation	1.57118	8.80246	10.858	WBGene00017759	sucl-2
X1981	chrIII	907093	907406	314	*	314	902212	907539	-	inside	446	133	NearestLocation	1.58912	4.58908	6.33151	WBGene00017760	F23H11.4
X1982	chrIII	942039	942424	386	*	386	941905	942868	-	inside	829	134	NearestLocation	1.50946	7.62642	9.60153	WBGene00023345	T12B5.9
X1983	chrIII	942699	943037	339	*	339	941905	942868	-	overlapStart	169	169	NearestLocation	2.10674	9.17522	11.2568	WBGene00023345	T12B5.9
X1984	chrIII	946914	947562	649	*	649	944780	946292	-	upstream	-622	622	NearestLocation	1.57519	3.11099	4.73275	WBGene00020456	fbxa-60
X1985	chrIII	981587	981851	265	*	265	973307	980451	-	upstream	-1136	1136	NearestLocation	1.54831	3.67128	5.33687	WBGene00019913	R06B10.2
X1986	chrIII	985391	985658	268	*	268	973307	980451	-	upstream	-4940	4940	NearestLocation	1.78081	4.83937	6.60839	WBGene00019913	R06B10.2
X1987	chrIII	991832	992085	254	*	254	991881	1001907	+	overlapStart	-49	49	NearestLocation	1.63884	7.61433	9.58795	WBGene00006615	trp-2
X1988	chrIII	1003852	1004146	295	*	295	1003113	1003175	-	upstream	-677	677	NearestLocation	1.57436	7.68229	9.66348	WBGene00202141	R06B10.8
X1989	chrIII	1006256	1006502	247	*	247	1008454	1009913	+	upstream	-2198	1952	NearestLocation	1.72825	9.64998	11.7687	WBGene00189956	Y34F4.6
X1990	chrIII	1009874	1010206	333	*	333	1010535	1011374	+	upstream	-661	329	NearestLocation	1.47988	6.14099	8.00288	WBGene00021337	Y34F4.2
X1991	chrIII	1079603	1080252	650	*	650	1078150	1080481	-	inside	878	229	NearestLocation	1.79001	10.6551	12.848	WBGene00004277	rab-18
X1992	chrIII	1136816	1137335	520	*	520	1125243	1136025	-	upstream	-791	791	NearestLocation	1.48269	4.7827	6.54703	WBGene00022106	lgc-46
[truncated: 4,374 more rows]

## Sheet: Up in H3K27Ac_cco_vs_ev (2283)
Peak	seqnames	start	end	width	strand	summit	start_position	end_position	feature_strand	insideFeature	distancetoFeature	shortestDistance	fromOverlappingOrNearest	fold.enrichment	FDR/-log10 qvalue	score	Gene ID	symbol
X0001	chrI	11343	11629	287	*	287	10413	16842	+	inside	930	930	NearestLocation	1.5266	11.6976	14.2043	WBGene00022276	nlp-40
X0002	chrI	12843	13178	336	*	336	10413	16842	+	inside	2430	2430	NearestLocation	1.60908	12.0966	14.6292	WBGene00022276	nlp-40
X0003	chrI	21692	22000	309	*	309	22882	23600	-	downstream	1908	882	NearestLocation	1.25559	3.07214	4.86167	WBGene00235381	Y74C9A.9
X0004	chrI	31982	32308	327	*	327	32415	32435	+	upstream	-433	107	NearestLocation	1.76011	15.8373	18.6616	WBGene00173569	21ur-13439
X0005	chrI	33398	33693	296	*	296	27595	32482	-	upstream	-916	916	NearestLocation	1.81011	14.9372	17.6924	WBGene00022279	sesn-1
X0006	chrI	34144	35858	1715	*	1715	27595	32482	-	upstream	-1662	1662	NearestLocation	1.59648	5.60162	7.58862	WBGene00022279	sesn-1
X0007	chrI	39963	40237	275	*	275	43733	44677	+	upstream	-3770	3496	NearestLocation	1.46779	5.61112	7.63998	WBGene00022275	Y74C9A.1
X0008	chrI	43216	43528	313	*	313	43733	44677	+	upstream	-517	205	NearestLocation	1.69874	17.4246	20.3841	WBGene00022275	Y74C9A.1
X0009	chrI	70454	72598	2145	*	2145	71425	81071	+	overlapStart	-971	971	NearestLocation	1.54345	2.29258	3.99157	WBGene00000812	csk-1
X0010	chrI	103034	103309	276	*	276	96535	108161	-	inside	5127	4852	NearestLocation	1.43305	7.52779	9.69527	WBGene00021681	Y48G1C.8
X0011	chrI	107725	108071	347	*	347	96535	108161	-	inside	436	90	NearestLocation	1.17317	1.94243	3.60271	WBGene00021681	Y48G1C.8
X0012	chrI	181225	183619	2395	*	2395	183364	208467	+	overlapStart	-2139	255	NearestLocation	1.53464	6.6284	8.71692	WBGene00000227	atm-1
X0013	chrI	183838	184175	338	*	338	183364	208467	+	inside	474	474	NearestLocation	2.00018	15.2111	17.9834	WBGene00000227	atm-1
X0014	chrI	289042	289621	580	*	580	286089	289138	-	overlapStart	96	96	NearestLocation	1.63046	2.58245	4.31864	WBGene00016905	ztf-3
X0015	chrI	299923	300197	275	*	275	291215	305460	+	inside	8708	5263	NearestLocation	1.64747	6.51081	8.6186	WBGene00016902	C53D5.1
X0016	chrI	301303	301617	315	*	315	305810	311130	-	downstream	9827	4193	NearestLocation	1.66668	14.5625	17.2852	WBGene00016906	C53D5.5
X0017	chrI	302491	302766	276	*	276	305810	311130	-	downstream	8639	3044	NearestLocation	1.5747	8.09436	10.3255	WBGene00016906	C53D5.5
X0018	chrI	307320	307605	286	*	286	305810	311130	-	inside	3810	1510	NearestLocation	1.32472	4.49675	6.4318	WBGene00016906	C53D5.5
X0019	chrI	311801	312078	278	*	278	305810	311130	-	upstream	-671	671	NearestLocation	1.5386	10.5132	12.9278	WBGene00016906	C53D5.5
X0020	chrI	313241	313749	509	*	509	310980	314989	-	inside	1748	1240	NearestLocation	1.20369	1.93792	3.59417	WBGene00002077	imb-3
X0021	chrI	318806	319090	285	*	285	316637	318258	-	upstream	-548	548	NearestLocation	1.65163	17.1358	20.0667	WBGene00235385	Y48G1A.7
X0022	chrI	323164	323438	275	*	275	318542	323352	-	overlapStart	188	86	NearestLocation	1.44424	10.9029	13.3443	WBGene00002079	xpo-2
X0023	chrI	383125	383422	298	*	298	382833	388847	+	inside	292	292	NearestLocation	1.47372	12.3142	14.8651	WBGene00006385	taf-4
X0024	chrI	384728	385082	355	*	355	382833	388847	+	inside	1895	1895	NearestLocation	1.26679	3.729	5.58667	WBGene00006385	taf-4
X0025	chrI	460886	461166	281	*	281	461995	462652	+	upstream	-1109	829	NearestLocation	1.6363	11.0172	13.4691	WBGene00021026	W04C9.4
X0026	chrI	511485	511769	285	*	285	512017	512166	+	upstream	-532	248	NearestLocation	1.50959	7.83661	10.0457	WBGene00196781	Y65B4BL.10
X0027	chrI	513938	514222	285	*	285	514364	514492	+	upstream	-426	142	NearestLocation	1.35522	6.56901	8.66758	WBGene00196389	Y65B4BL.9
X0028	chrI	514966	515249	284	*	284	514364	514492	+	downstream	602	474	NearestLocation	1.47389	6.83878	8.97469	WBGene00196389	Y65B4BL.9
X0029	chrI	535828	536118	291	*	291	535791	536670	+	inside	37	37	NearestLocation	1.36616	8.75677	11.0318	WBGene00022042	icd-2
X0030	chrI	537660	537966	307	*	307	537122	542173	+	inside	538	538	NearestLocation	1.38432	8.50242	10.7467	WBGene00007009	wwp-1
X0031	chrI	538490	538888	399	*	399	539086	539242	+	upstream	-596	198	NearestLocation	1.24727	3.25601	5.05608	WBGene00220191	Y65B4BR.12
X0032	chrI	548465	548778	314	*	314	550708	556638	+	upstream	-2243	1930	NearestLocation	1.67164	8.97225	11.2717	WBGene00004235	ptr-21
X0033	chrI	549929	550300	372	*	372	550708	556638	+	upstream	-779	408	NearestLocation	1.57461	14.7362	17.473	WBGene00004235	ptr-21
X0034	chrI	550614	550895	282	*	282	550708	556638	+	overlapStart	-94	94	NearestLocation	1.70652	18.3697	21.3998	WBGene00004235	ptr-21
X0035	chrI	634388	634678	291	*	291	631055	636350	-	inside	1962	1672	NearestLocation	1.21929	2.01829	3.683	WBGene00022029	Y65B4A.6
X0036	chrI	670737	671235	499	*	499	667615	674413	-	inside	3676	3122	NearestLocation	1.80042	5.09029	7.07121	WBGene00044461	Y18H1A.14
X0037	chrI	716432	717179	748	*	748	700274	715850	-	upstream	-582	582	NearestLocation	1.50966	3.5959	5.43028	WBGene00021209	hgap-1
X0038	chrI	853608	854084	477	*	477	853451	871947	+	inside	157	157	NearestLocation	1.32736	3.92261	5.78789	WBGene00022388	Y95B8A.8
X0039	chrI	881034	881387	354	*	354	872768	882713	-	inside	1679	1326	NearestLocation	1.49412	6.73345	8.85361	WBGene00022389	pde-6
X0040	chrI	881702	882042	341	*	341	872768	882713	-	inside	1011	671	NearestLocation	1.34464	7.60283	9.77572	WBGene00022389	pde-6
X0041	chrI	882281	882629	349	*	349	872768	882713	-	inside	432	84	NearestLocation	1.24084	3.85327	5.72828	WBGene00022389	pde-6
X0042	chrI	934613	934983	371	*	371	938483	941776	+	upstream	-3870	3500	NearestLocation	1.3706	1.798	3.43757	WBGene00022383	Y95B8A.2
X0043	chrI	960499	960816	318	*	318	948566	957373	-	upstream	-3126	3126	NearestLocation	1.20982	1.9152	3.56922	WBGene00003238	mig-1
X0044	chrI	978940	979214	275	*	275	979125	979274	+	overlapStart	-185	60	NearestLocation	1.78232	4.12412	6.01702	WBGene00197993	F54A5.4
X0045	chrI	981034	981310	277	*	277	979125	979274	-	upstream	-1760	1760	NearestLocation	1.59523	2.77311	4.52769	WBGene00200860	F54A5.5
X0046	chrI	1015368	1015688	321	*	321	1015204	1015731	-	inside	363	43	NearestLocation	1.56006	6.96476	9.08869	WBGene00236808	C54G6.8
X0047	chrI	1029704	1029991	288	*	288	1019825	1029952	-	overlapStart	248	39	NearestLocation	1.6561	17.5814	20.5464	WBGene00021327	mrpl-38
X0048	chrI	1030777	1031161	385	*	385	1019825	1029952	-	upstream	-825	825	NearestLocation	1.56827	13.8374	16.5195	WBGene00021327	mrpl-38
X0049	chrI	1031909	1032346	438	*	438	1030629	1033436	-	inside	1527	1090	NearestLocation	1.37643	7.32954	9.49338	WBGene00004952	spd-1
X0050	chrI	1046397	1046685	289	*	289	1049594	1050726	+	upstream	-3197	2909	NearestLocation	1.66324	13.1062	15.7223	WBGene00021331	glrx-10
X0051	chrI	1047881	1048224	344	*	344	1049594	1050726	+	upstream	-1713	1370	NearestLocation	2.15258	19.4339	22.545	WBGene00021331	glrx-10
X0052	chrI	1048713	1049281	569	*	569	1049594	1050726	+	upstream	-881	313	NearestLocation	1.84592	10.1699	12.5493	WBGene00021331	glrx-10
X0053	chrI	1050881	1051168	288	*	288	1049594	1050726	+	downstream	1287	155	NearestLocation	1.64425	13.6442	16.2993	WBGene00021331	glrx-10
X0054	chrI	1051795	1052140	346	*	346	1050921	1053645	-	inside	1850	874	NearestLocation	1.76913	18.1858	21.1968	WBGene00021333	Y34D9A.8
X0055	chrI	1064665	1064941	277	*	277	1053921	1066899	-	inside	2234	1958	NearestLocation	1.53043	8.83091	11.1143	WBGene00021334	vps-4
X0056	chrI	1069337	1069662	326	*	326	1068591	1075010	+	inside	746	746	NearestLocation	1.16736	1.88107	3.5314	WBGene00001745	gsa-1
X0057	chrI	1069941	1070514	574	*	574	1068591	1075010	+	inside	1350	1350	NearestLocation	1.30885	4.12168	6.00207	WBGene00001745	gsa-1
X0058	chrI	1095578	1095898	321	*	321	1089666	1095796	-	overlapStart	218	102	NearestLocation	1.64448	13.8099	16.4761	WBGene00019911	R06A10.4
X0059	chrI	1155374	1155661	288	*	288	1155343	1156020	-	inside	646	31	NearestLocation	1.41806	9.31275	11.6322	WBGene00000165	aps-3
X0060	chrI	1224080	1224366	287	*	287	1223956	1229282	-	inside	5202	124	NearestLocation	1.94713	14.3416	17.0502	WBGene00021691	Y48G8AL.13
X0061	chrI	1226556	1226859	304	*	304	1223956	1229282	-	inside	2726	2423	NearestLocation	1.68505	9.5321	11.8727	WBGene00021691	Y48G8AL.13
X0062	chrI	1227278	1228808	1531	*	1531	1223956	1229282	-	inside	2004	474	NearestLocation	1.51933	3.38382	5.20194	WBGene00021691	Y48G8AL.13
X0063	chrI	1299144	1299664	521	*	521	1305575	1328228	+	upstream	-6431	5911	NearestLocation	1.82508	4.68934	6.6388	WBGene00003400	dapk-1
X0064	chrI	1301208	1301985	778	*	778	1305575	1328228	+	upstream	-4367	3590	NearestLocation	2.03546	7.4863	9.65001	WBGene00003400	dapk-1
X0065	chrI	1334673	1335133	461	*	461	1335375	1336870	+	upstream	-702	242	NearestLocation	1.41608	1.82061	3.46392	WBGene00019674	K12C11.3
X0066	chrI	1338459	1338733	275	*	275	1338785	1339769	+	upstream	-326	52	NearestLocation	1.52745	8.81858	11.088	WBGene00045053	K12C11.7
X0067	chrI	1359182	1359601	420	*	420	1365309	1375883	+	upstream	-6127	5708	NearestLocation	1.85858	4.93192	6.89554	WBGene00022366	Y92H12BL.5
X0068	chrI	1360154	1362222	2069	*	2069	1365309	1375883	+	upstream	-5155	3087	NearestLocation	1.9487	6.18747	8.25759	WBGene00022366	Y92H12BL.5
X0069	chrI	1367839	1368126	288	*	288	1365309	1375883	+	inside	2530	2530	NearestLocation	1.68967	14.3177	17.0296	WBGene00022366	Y92H12BL.5
X0070	chrI	1370673	1370950	278	*	278	1365309	1375883	+	inside	5364	4933	NearestLocation	1.87479	13.704	16.3585	WBGene00022366	Y92H12BL.5
X0071	chrI	1416278	1416782	505	*	505	1416591	1425013	+	overlapStart	-313	191	NearestLocation	1.49573	3.28927	5.10267	WBGene00022369	Y92H12BR.3
X0072	chrI	1538407	1538912	506	*	506	1543525	1556195	+	upstream	-5118	4613	NearestLocation	1.62123	2.47208	4.19296	WBGene00022358	Y92H12A.2
X0073	chrI	1540432	1540726	295	*	295	1543525	1556195	+	upstream	-3093	2799	NearestLocation	1.6665	9.12554	11.4166	WBGene00022358	Y92H12A.2
X0074	chrI	1541280	1541837	558	*	558	1543525	1556195	+	upstream	-2245	1688	NearestLocation	1.80338	4.3325	6.24748	WBGene00022358	Y92H12A.2
X0075	chrI	1576109	1576602	494	*	494	1575714	1575803	-	upstream	-306	306	NearestLocation	1.54446	1.82885	3.47391	WBGene00195355	Y92H12A.8
X0076	chrI	1597010	1597317	308	*	308	1594656	1596175	-	upstream	-835	835	NearestLocation	2.03807	10.1913	12.5822	WBGene00022271	cpx-1
X0077	chrI	1610465	1610750	286	*	286	1610390	1619943	+	inside	75	75	NearestLocation	1.37681	6.67683	8.80059	WBGene00044440	adpr-1
X0078	chrI	1685604	1686191	588	*	588	1680450	1685063	+	downstream	5154	541	NearestLocation	1.47917	8.90712	11.1844	WBGene00022154	drag-1
X0079	chrI	1750696	1751010	315	*	315	1740647	1751055	-	inside	359	45	NearestLocation	1.63437	10.4078	12.8139	WBGene00022159	mppa-1
X0080	chrI	1913441	1913718	278	*	278	1911678	1913966	-	inside	525	248	NearestLocation	1.37184	2.40296	4.1211	WBGene00021768	Y51F10.7
X0081	chrI	1919607	1920038	432	*	432	1916942	1917064	-	upstream	-2543	2543	NearestLocation	1.89646	5.39951	7.4018	WBGene00219760	anr-19
X0082	chrI	1958432	1958718	287	*	287	1958707	1964972	+	overlapStart	-275	11	NearestLocation	1.55614	14.3887	17.1032	WBGene00044438	Y51F10.11
X0083	chrI	2009998	2010545	548	*	548	1988723	2010479	-	overlapStart	481	66	NearestLocation	1.70289	3.38898	5.20655	WBGene00021238	gap-3
X0084	chrI	2010806	2011096	291	*	291	1988723	2010479	-	upstream	-327	327	NearestLocation	1.52674	2.87048	4.6384	WBGene00021238	gap-3
X0085	chrI	2011645	2011943	299	*	299	1988723	2010479	-	upstream	-1166	1166	NearestLocation	2.0748	9.93188	12.2981	WBGene00021238	gap-3
X0086	chrI	2018653	2019405	753	*	753	2019432	2019523	+	upstream	-779	27	NearestLocation	1.87704	7.37368	9.5207	WBGene00220136	Y20F4.11
X0087	chrI	2020986	2021271	286	*	286	2019432	2019523	+	downstream	1554	1463	NearestLocation	1.79277	12.5792	15.1546	WBGene00220136	Y20F4.11
X0088	chrI	2022900	2023183	284	*	284	2026316	2033948	+	upstream	-3416	3133	NearestLocation	1.65842	9.5358	11.8743	WBGene00021237	crtc-1
X0089	chrI	2024698	2025291	594	*	594	2026316	2033948	+	upstream	-1618	1025	NearestLocation	1.62183	2.82336	4.58301	WBGene00021237	crtc-1
X0090	chrI	2069093	2069534	442	*	442	2069041	2069587	-	inside	494	52	NearestLocation	1.25885	4.17458	6.08411	WBGene00004409	rla-1
X0091	chrI	2071750	2072360	611	*	611	2072680	2076906	+	upstream	-930	320	NearestLocation	1.36165	7.68077	9.86062	WBGene00021351	Y37E3.10
X0092	chrI	2074467	2074780	314	*	314	2072680	2076906	+	inside	1787	1787	NearestLocation	1.73388	17.6585	20.6292	WBGene00021351	Y37E3.10
X0093	chrI	2077843	2078208	366	*	366	2078959	2085678	+	upstream	-1116	751	NearestLocation	1.52464	3.00292	4.7831	WBGene00021352	Y37E3.11
X0094	chrI	2082093	2082397	305	*	305	2084806	2085027	-	downstream	2934	2409	NearestLocation	1.59886	3.84995	5.72132	WBGene00200606	Y37E3.29
X0095	chrI	2082728	2083064	337	*	337	2084806	2085027	-	downstream	2299	1742	NearestLocation	2.03587	12.5946	15.1702	WBGene00200606	Y37E3.29
X0096	chrI	2118833	2119115	283	*	283	2113655	2118550	-	upstream	-283	283	NearestLocation	1.84699	4.84221	6.80298	WBGene00021354	fpn-1.1
X0097	chrI	2120092	2120844	753	*	753	2113655	2118550	-	upstream	-1542	1542	NearestLocation	1.60335	2.27836	3.9813	WBGene00021354	fpn-1.1
X0098	chrI	2126273	2127744	1472	*	1472	2128590	2145968	+	upstream	-2317	846	NearestLocation	1.83935	4.75295	6.70143	WBGene00021355	Y37E3.17
X0099	chrI	2168031	2168486	456	*	456	2160042	2209635	+	inside	7989	7989	NearestLocation	1.3789	6.82186	8.94411	WBGene00021009	afd-1
X0100	chrI	2189768	2191212	1445	*	1445	2216100	2219442	+	upstream	-26332	24888	NearestLocation	1.80467	4.40116	6.31348	WBGene00021008	W03F11.5
X0101	chrI	2254158	2254454	297	*	297	2250131	2254901	+	inside	4027	447	NearestLocation	1.41409	8.10478	10.3281	WBGene00017398	slc-17.6
X0102	chrI	2255604	2255883	280	*	280	2250131	2254901	+	downstream	5473	703	NearestLocation	1.83924	9.24044	11.5294	WBGene00017398	slc-17.6
X0103	chrI	2273075	2273414	340	*	340	2255923	2272866	-	upstream	-209	209	NearestLocation	1.51987	8.88799	11.1671	WBGene00000020	abt-2
X0104	chrI	2419606	2420042	437	*	437	2418450	2420404	-	inside	798	362	NearestLocation	1.19599	2.57104	4.29775	WBGene00017734	F23C8.5
X0105	chrI	2420897	2421474	578	*	578	2420831	2421742	-	inside	845	66	NearestLocation	1.29355	5.55742	7.56483	WBGene00017735	did-2
X0106	chrI	2433960	2434289	330	*	330	2434004	2435709	+	overlapStart	-44	44	NearestLocation	1.30162	6.37542	8.43856	WBGene00017733	ubxn-1
X0107	chrI	2484919	2486041	1123	*	1123	2485868	2489773	+	overlapStart	-949	173	NearestLocation	1.67166	7.17183	9.30919	WBGene00001232	eif-3.I
X0108	chrI	2486735	2487018	284	*	284	2485868	2489773	+	inside	867	867	NearestLocation	1.64609	10.0588	12.4433	WBGene00001232	eif-3.I
X0109	chrI	2628923	2629308	386	*	386	2623101	2628577	-	upstream	-346	346	NearestLocation	1.60451	4.26233	6.15657	WBGene00000800	cars-1
X0110	chrI	2659180	2659551	372	*	372	2645266	2657241	-	upstream	-1939	1939	NearestLocation	1.66801	14.6532	17.3878	WBGene00018232	F40E3.5
X0111	chrI	2664445	2664745	301	*	301	2666384	2666468	+	upstream	-1939	1639	NearestLocation	1.85642	22.3175	25.6827	WBGene00219930	F32B5.17
X0112	chrI	2667449	2667760	312	*	312	2668160	2672429	+	upstream	-711	400	NearestLocation	1.57166	7.34515	9.50826	WBGene00017979	F32B5.6
X0113	chrI	2668733	2669115	383	*	383	2668160	2672429	+	inside	573	573	NearestLocation	1.41939	6.98822	9.11698	WBGene00017979	F32B5.6
X0114	chrI	2673182	2673472	291	*	291	2678059	2678205	+	upstream	-4877	4587	NearestLocation	1.51784	10.7529	13.1821	WBGene00198883	F32B5.12
X0115	chrI	2682451	2682789	339	*	339	2672947	2682797	-	inside	346	8	NearestLocation	1.47758	11.1513	13.6066	WBGene00017980	F32B5.7
X0116	chrI	2774866	2775184	319	*	319	2774910	2775422	+	overlapStart	-44	44	NearestLocation	1.49173	10.5625	12.9763	WBGene00022125	Y71F9B.1
X0117	chrI	2777295	2777572	278	*	278	2776370	2778719	-	inside	1424	925	NearestLocation	1.69921	15.4666	18.265	WBGene00022131	Y71F9B.13
X0118	chrI	2778201	2778752	552	*	552	2776370	2778719	-	overlapStart	518	33	NearestLocation	1.4115	4.46418	6.37597	WBGene00022131	Y71F9B.13
X0119	chrI	2857268	2858477	1210	*	1210	2858599	2859847	-	downstream	2579	122	NearestLocation	1.73887	5.82441	7.84136	WBGene00044433	W10C8.6
X0120	chrI	2863931	2864365	435	*	435	2864011	2864061	-	includeFeature	130	80	NearestLocation	1.27322	4.11378	6.00154	WBGene00200294	Y71F9AL.21
X0121	chrI	2869916	2870206	291	*	291	2866429	2870105	+	overlapEnd	3487	101	NearestLocation	1.49405	3.32481	5.14008	WBGene00022115	Y71F9AL.10
X0122	chrI	2878960	2879257	298	*	298	2878578	2880936	+	inside	382	382	NearestLocation	1.64232	15.0271	17.7922	WBGene00022113	Y71F9AL.8
X0123	chrI	2894814	2895125	312	*	312	2883496	2893718	-	upstream	-1096	1096	NearestLocation	1.42363	2.04569	3.71204	WBGene00000199	arx-1
X0124	chrI	2962641	2962994	354	*	354	2967616	2967740	+	upstream	-4975	4622	NearestLocation	1.48064	1.59551	3.20818	WBGene00200726	Y71F9AR.7
X0125	chrI	3011115	3011545	431	*	431	3010690	3011659	+	inside	425	114	NearestLocation	1.23645	3.21502	5.02002	WBGene00000625	col-48
X0126	chrI	3018979	3019848	870	*	870	3021649	3028384	+	upstream	-2670	1801	NearestLocation	2.76143	18.8518	21.9191	WBGene00021842	Y54E10BR.3
X0127	chrI	3085619	3085919	301	*	301	3070970	3084874	-	upstream	-745	745	NearestLocation	2.00262	14.8019	17.544	WBGene00019697	M01B12.4
X0128	chrI	3096184	3096548	365	*	365	3085013	3096275	-	overlapStart	91	91	NearestLocation	1.86409	5.46755	7.48228	WBGene00019698	riok-1
X0129	chrI	3098110	3098805	696	*	696	3099681	3099769	+	upstream	-1571	876	NearestLocation	1.68746	3.20753	4.99986	WBGene00197503	C45E1.7
X0130	chrI	3103097	3103521	425	*	425	3103211	3103283	-	includeFeature	186	114	NearestLocation	1.51869	1.85271	3.5	WBGene00197193	C45E1.6
X0130	chrI	3103097	3103521	425	*	425	3103211	3103283	+	includeFeature	-114	114	NearestLocation	1.51869	1.85271	3.5	WBGene00199215	C45E1.9
X0131	chrI	3112350	3113095	746	*	746	3109648	3110672	-	upstream	-1678	1678	NearestLocation	1.50047	4.36738	6.26372	WBGene00195056	C45E1.5
X0132	chrI	3116759	3117318	560	*	560	3116084	3116175	-	upstream	-584	584	NearestLocation	1.43062	8.8882	11.1732	WBGene00197996	C45E1.8
X0133	chrI	3118138	3118562	425	*	425	3116084	3116175	-	upstream	-1963	1963	NearestLocation	1.53262	1.73033	3.36261	WBGene00197996	C45E1.8
X0134	chrI	3126809	3127088	280	*	280	3115036	3125145	-	upstream	-1664	1664	NearestLocation	1.75551	13.0721	15.6842	WBGene00016663	C45E1.4
X0135	chrI	3144460	3144848	389	*	389	3141705	3143175	-	upstream	-1285	1285	NearestLocation	1.23095	2.09827	3.778	WBGene00019597	K09H9.5
X0136	chrI	3147087	3147737	651	*	651	3144411	3147859	-	inside	772	122	NearestLocation	1.50096	2.68797	4.42802	WBGene00003062	lpd-6
X0137	chrI	3162790	3163078	289	*	289	3162813	3163649	+	overlapStart	-23	23	NearestLocation	1.40685	10.4426	12.8403	WBGene00021829	mrpl-17
X0138	chrI	3222718	3223014	297	*	297	3217288	3222950	-	overlapStart	232	64	NearestLocation	1.8661	11.0293	13.4878	WBGene00004404	rom-5
X0139	chrI	3246350	3246667	318	*	318	3246221	3246370	+	overlapEnd	129	20	NearestLocation	1.51675	12.9111	15.5075	WBGene00198001	Y54E10A.24
X0140	chrI	3248185	3248777	593	*	593	3248205	3248416	+	includeFeature	-20	20	NearestLocation	1.31553	5.29814	7.29199	WBGene00199669	Y54E10A.25
X0141	chrI	3296535	3296821	287	*	287	3293168	3294356	-	upstream	-2179	2179	NearestLocation	1.73561	4.00917	5.89456	WBGene00020917	W01B11.6
X0142	chrI	3298455	3299017	563	*	563	3299606	3300490	+	upstream	-1151	589	NearestLocation	2.01665	6.82193	8.95023	WBGene00020913	W01B11.1
X0143	chrI	3318094	3318376	283	*	283	3317978	3318586	-	inside	492	116	NearestLocation	1.61534	8.72306	10.9992	WBGene00021548	trx-4
X0144	chrI	3327877	3328173	297	*	297	3319853	3330673	-	inside	2796	2500	NearestLocation	1.86786	9.81434	12.1714	WBGene00021549	Y44E3A.4
X0145	chrI	3412404	3413011	608	*	608	3410345	3411465	-	upstream	-939	939	NearestLocation	1.52891	2.06424	3.73398	WBGene00219710	anr-45
X0146	chrI	3465532	3467716	2185	*	2185	3467132	3477971	+	overlapStart	-1600	584	NearestLocation	1.81884	6.41993	8.514	WBGene00004978	spg-7
X0147	chrI	3481170	3481461	292	*	292	3481987	3484500	+	upstream	-817	526	NearestLocation	1.50869	1.8629	3.51033	WBGene00000794	crn-1
X0148	chrI	3502452	3503368	917	*	917	3502738	3508424	+	overlapStart	-286	286	NearestLocation	1.6871	3.1586	4.94716	WBGene00021637	Y47G6A.7
X0149	chrI	3567480	3567847	368	*	368	3567651	3567707	-	includeFeature	227	140	NearestLocation	2.05749	12.7651	15.3506	WBGene00200878	Y47G6A.35
X0150	chrI	3718862	3719172	311	*	311	3713139	3721157	-	inside	2295	1985	NearestLocation	1.37691	6.9554	9.07701	WBGene00003040	lin-59
X0151	chrI	3723403	3723706	304	*	304	3713139	3721157	-	upstream	-2246	2246	NearestLocation	1.5911	15.7537	18.5764	WBGene00003040	lin-59
X0152	chrI	3825711	3826014	304	*	304	3824947	3826514	+	inside	764	500	NearestLocation	1.44766	5.69995	7.71774	WBGene00006833	unc-108
X0153	chrI	3827195	3827511	317	*	317	3827208	3828143	+	overlapStart	-13	13	NearestLocation	1.62429	15.1309	17.8973	WBGene00018765	F53F10.3
X0154	chrI	3831098	3831397	300	*	300	3831117	3834124	+	overlapStart	-19	19	NearestLocation	1.30035	3.03642	4.81787	WBGene00018764	F53F10.2
X0155	chrI	4247357	4248267	911	*	911	4242819	4247580	-	overlapStart	223	223	NearestLocation	1.48057	2.6949	4.44016	WBGene00016606	exoc-7
X0156	chrI	4302775	4303104	330	*	330	4303930	4308244	+	upstream	-1155	826	NearestLocation	1.6906	4.74731	6.69815	WBGene00021628	Y47D9A.1
X0157	chrI	4375887	4376186	300	*	300	4373656	4379351	+	inside	2231	2231	NearestLocation	1.62308	3.29567	5.10604	WBGene00022831	cec-10
X0158	chrI	4433084	4433631	548	*	548	4427024	4428026	+	downstream	6060	5058	NearestLocation	1.60447	2.37099	4.07648	WBGene00195180	C41D11.10
X0159	chrI	4433977	4434255	279	*	279	4427024	4428026	+	downstream	6953	5951	NearestLocation	1.79799	4.29464	6.20627	WBGene00195180	C41D11.10
X0160	chrI	4434995	4435274	280	*	280	4427024	4428026	+	downstream	7971	6969	NearestLocation	1.7292	3.45549	5.28827	WBGene00195180	C41D11.10
X0161	chrI	4436694	4436977	284	*	284	4428475	4444342	-	inside	7648	7365	NearestLocation	1.58372	13.0524	15.6637	WBGene00016562	C41D11.3
X0162	chrI	4444659	4445565	907	*	907	4444719	4446593	+	overlapStart	-60	60	NearestLocation	1.62499	3.21029	5.00958	WBGene00001231	eif-3.H
X0163	chrI	4477808	4478189	382	*	382	4479639	4479659	-	downstream	1851	1450	NearestLocation	1.48709	3.94517	5.82222	WBGene00173238	21ur-14920
X0164	chrI	4488117	4488418	302	*	302	4494681	4494760	-	downstream	6643	6263	NearestLocation	1.77462	3.94308	5.82179	WBGene00220054	T01A4.8
X0165	chrI	4611518	4612353	836	*	836	4605655	4610202	+	downstream	5863	1316	NearestLocation	1.73403	3.80664	5.66486	WBGene00016654	C44E4.5
X0166	chrI	4635076	4635424	349	*	349	4634991	4635011	+	downstream	85	65	NearestLocation	1.44638	10.8252	13.2598	WBGene00170884	21ur-14833
X0167	chrI	4635890	4636397	508	*	508	4634991	4635011	+	downstream	899	879	NearestLocation	1.52103	3.51651	5.3525	WBGene00170884	21ur-14833
X0168	chrI	4651540	4651989	450	*	450	4648269	4650770	-	upstream	-770	770	NearestLocation	1.4854	3.84476	5.70401	WBGene00015009	B0041.5
X0169	chrI	4666959	4667278	320	*	320	4664499	4665348	+	downstream	2460	1611	NearestLocation	1.94202	5.95537	8.0061	WBGene00015006	B0041.1
X0170	chrI	4673074	4673397	324	*	324	4665744	4671738	-	upstream	-1336	1336	NearestLocation	1.60124	2.91076	4.68491	WBGene00006961	xnp-1
X0171	chrI	4673615	4674309	695	*	695	4675135	4679409	+	upstream	-1520	826	NearestLocation	1.38708	1.92803	3.58488	WBGene00006791	unc-57
X0172	chrI	4686392	4686980	589	*	589	4684316	4684414	-	upstream	-1978	1978	NearestLocation	1.43026	6.4427	8.51282	WBGene00003338	mir-244
X0173	chrI	4804682	4805195	514	*	514	4805607	4809675	+	upstream	-925	412	NearestLocation	1.67776	3.01125	4.79136	WBGene00018797	F54D7.2
X0174	chrI	4906694	4907016	323	*	323	4906823	4911831	+	overlapStart	-129	129	NearestLocation	1.50266	9.57585	11.9211	WBGene00017671	pgal-1
X0175	chrI	4908915	4909208	294	*	294	4906823	4911831	+	inside	2092	2092	NearestLocation	1.7837	5.27214	7.26832	WBGene00017671	pgal-1
X0176	chrI	4913811	4914159	349	*	349	4911803	4914047	-	overlapStart	236	112	NearestLocation	1.60345	17.9566	20.9605	WBGene00017675	F21F3.6
X0177	chrI	4915281	4915629	349	*	349	4911803	4914047	-	upstream	-1234	1234	NearestLocation	1.44056	2.78661	4.53548	WBGene00017675	F21F3.6
X0178	chrI	4915949	4916225	277	*	277	4911803	4914047	-	upstream	-1902	1902	NearestLocation	1.52801	7.8411	10.0544	WBGene00017675	F21F3.6
X0179	chrI	4980145	4980451	307	*	307	4980307	4983955	+	overlapStart	-162	144	NearestLocation	1.68841	4.3009	6.2088	WBGene00004900	snf-1
X0180	chrI	4995657	4997296	1640	*	1640	4996839	5003092	+	overlapStart	-1182	457	NearestLocation	1.67448	3.19446	4.99494	WBGene00003221	mes-3
X0181	chrI	5023964	5024245	282	*	282	5023889	5041157	+	inside	75	75	NearestLocation	1.62655	11.0885	13.55	WBGene00002979	lfe-2
X0182	chrI	5031858	5032572	715	*	715	5023889	5041157	+	inside	7969	7969	NearestLocation	1.50467	8.07925	10.303	WBGene00002979	lfe-2
X0183	chrI	5036638	5036951	314	*	314	5041492	5042055	+	upstream	-4854	4541	NearestLocation	1.86756	19.0731	22.1516	WBGene00016729	C46H11.3
X0184	chrI	5134121	5135232	1112	*	1112	5134739	5137974	+	overlapStart	-618	493	NearestLocation	1.65942	4.0786	5.94876	WBGene00003475	mtm-1
X0185	chrI	5244542	5244902	361	*	361	5244283	5245523	+	inside	259	259	NearestLocation	1.36161	1.23757	2.7977	WBGene00015092	mrpl-47
X0186	chrI	5255924	5256372	449	*	449	5255447	5256923	-	inside	999	477	NearestLocation	1.33914	3.57438	5.40572	WBGene00015094	B0261.6
X0187	chrI	5261108	5261884	777	*	777	5263694	5268384	+	upstream	-2586	1810	NearestLocation	1.5751	2.08048	3.7555	WBGene00015091	B0261.1
X0188	chrI	5281576	5282028	453	*	453	5278804	5281516	-	upstream	-60	60	NearestLocation	1.61261	2.51099	4.24124	WBGene00000965	dhs-1
X0189	chrI	5290134	5290542	409	*	409	5284057	5291604	-	inside	1470	1062	NearestLocation	1.4687	1.38393	2.9653	WBGene00001333	erm-1
X0190	chrI	5344559	5345318	760	*	760	5342178	5344724	-	overlapStart	165	165	NearestLocation	1.56172	2.38052	4.08941	WBGene00000150	apm-1
X0191	chrI	5345564	5346372	809	*	809	5345928	5349645	+	overlapStart	-364	364	NearestLocation	1.7668	4.46474	6.38758	WBGene00018864	F55A12.5
X0192	chrI	5358088	5358493	406	*	406	5358146	5358293	-	includeFeature	205	58	NearestLocation	1.56905	3.09855	4.89428	WBGene00198093	F55A12.14
X0193	chrI	5376482	5376896	415	*	415	5380160	5383029	+	upstream	-3678	3264	NearestLocation	1.8267	4.87675	6.84383	WBGene00016041	C24A11.2
X0194	chrI	5377416	5377743	328	*	328	5380160	5383029	+	upstream	-2744	2417	NearestLocation	1.63111	16.8433	19.7494	WBGene00016041	C24A11.2
X0195	chrI	5378572	5380876	2305	*	2305	5380160	5383029	+	overlapStart	-1588	716	NearestLocation	1.93842	6.89567	9.02116	WBGene00016041	C24A11.2
X0196	chrI	5381088	5381450	363	*	363	5380160	5383029	+	inside	928	928	NearestLocation	1.52333	1.62051	3.2392	WBGene00016041	C24A11.2
X0197	chrI	5383277	5383751	475	*	475	5372851	5384508	-	inside	1231	757	NearestLocation	1.55522	1.87045	3.52301	WBGene00004131	pqn-44
X0198	chrI	5388294	5388582	289	*	289	5388900	5388920	-	downstream	626	318	NearestLocation	1.61514	11.5398	14.0352	WBGene00173516	21ur-14736
X0199	chrI	5408013	5408886	874	*	874	5402895	5408459	-	overlapStart	446	427	NearestLocation	1.75153	3.93526	5.80299	WBGene00001491	frm-4
X0200	chrI	5409664	5410027	364	*	364	5409666	5409733	+	includeFeature	-2	2	NearestLocation	1.5399	2.36759	4.0788	WBGene00198089	C24A11.11
X0200	chrI	5409664	5410027	364	*	364	5409666	5409733	-	includeFeature	69	2	NearestLocation	1.5399	2.36759	4.0788	WBGene00198102	C24A11.12
X0201	chrI	5410275	5410631	357	*	357	5409666	5409733	-	upstream	-542	542	NearestLocation	1.45934	1.32207	2.89527	WBGene00198102	C24A11.12
X0202	chrI	5411010	5412068	1059	*	1059	5412497	5412640	+	upstream	-1487	429	NearestLocation	1.57902	3.19206	4.98274	WBGene00201694	C24A11.13
X0203	chrI	5412441	5412827	387	*	387	5412497	5412640	+	includeFeature	-56	56	NearestLocation	1.52204	1.75044	3.3852	WBGene00201694	C24A11.13
X0204	chrI	5414934	5416889	1956	*	1956	5412842	5415629	-	overlapStart	695	695	NearestLocation	1.78216	4.15432	6.04276	WBGene00000761	coq-1
X0205	chrI	5511554	5512223	670	*	670	5509473	5511689	-	overlapStart	135	135	NearestLocation	1.84906	5.85949	7.88616	WBGene00019079	rpa-4
X0206	chrI	5527686	5528550	865	*	865	5522396	5525340	-	upstream	-2346	2346	NearestLocation	1.66166	2.83161	4.59458	WBGene00019081	F59A3.8
X0207	chrI	5545450	5546241	792	*	792	5546149	5561642	+	overlapStart	-699	92	NearestLocation	1.55786	2.4434	4.16462	WBGene00006594	tom-1
X0208	chrI	5547065	5547356	292	*	292	5547013	5547033	-	upstream	-32	32	NearestLocation	1.69493	14.3978	17.1142	WBGene00167738	21ur-13147
X0209	chrI	5550304	5550711	408	*	408	5549137	5550505	-	overlapStart	201	201	NearestLocation	1.43821	1.87871	3.52659	WBGene00019693	ostd-1
X0210	chrI	5569676	5570070	395	*	395	5566345	5570081	-	inside	405	11	NearestLocation	1.49227	1.61333	3.22642	WBGene00019713	pqn-52
X0211	chrI	5608435	5608828	394	*	394	5607822	5608840	-	inside	405	12	NearestLocation	1.54463	1.79696	3.43954	WBGene00006726	ubl-5
X0212	chrI	5610010	5610308	299	*	299	5609310	5610270	-	overlapStart	260	38	NearestLocation	1.73401	5.87726	7.93334	WBGene00006919	vha-10
X0213	chrI	5610537	5611491	955	*	955	5609310	5610270	-	upstream	-267	267	NearestLocation	1.63403	4.13362	6.01362	WBGene00006919	vha-10
X0214	chrI	5618052	5618524	473	*	473	5616595	5618551	-	inside	499	27	NearestLocation	1.86773	8.19035	10.4136	WBGene00018509	F46F11.6
X0215	chrI	5626129	5627070	942	*	942	5624602	5626288	-	overlapStart	159	159	NearestLocation	1.54926	2.59302	4.31969	WBGene00018511	F46F11.8
X0216	chrI	5652683	5653244	562	*	562	5649756	5653639	-	inside	956	395	NearestLocation	1.65448	2.81739	4.57913	WBGene00018891	F55F8.3
X0217	chrI	5689895	5690751	857	*	857	5679844	5691503	-	inside	1608	752	NearestLocation	1.64279	3.02931	4.80743	WBGene00006776	unc-40
X0218	chrI	5699006	5699903	898	*	898	5702156	5706838	+	upstream	-3150	2253	NearestLocation	1.6613	3.24406	5.04216	WBGene00020556	pamn-1
X0219	chrI	5761936	5762756	821	*	821	5760896	5762435	-	overlapStart	499	321	NearestLocation	1.62916	2.90013	4.66588	WBGene00045483	oxy-5
X0220	chrI	5803654	5804198	545	*	545	5801872	5803266	+	downstream	1782	388	NearestLocation	1.52217	1.60856	3.22609	WBGene00015175	srz-4
X0221	chrI	5806712	5807211	500	*	500	5803959	5807291	-	inside	579	80	NearestLocation	1.5223	3.7469	5.58989	WBGene00015176	vps-51
X0222	chrI	5825362	5825804	443	*	443	5825720	5825888	+	overlapStart	-358	84	NearestLocation	1.51694	2.52145	4.23782	WBGene00219845	C32F10.9
X0223	chrI	5826449	5827568	1120	*	1120	5822841	5826148	-	upstream	-301	301	NearestLocation	1.53493	2.63776	4.37269	WBGene00016333	C32F10.8
X0224	chrI	5828921	5829593	673	*	673	5829072	5834642	+	overlapStart	-151	151	NearestLocation	1.45054	1.82741	3.47077	WBGene00016331	obr-4
X0225	chrI	5869490	5870232	743	*	743	5868263	5870114	-	overlapStart	624	118	NearestLocation	1.45423	1.47451	3.0696	WBGene00018008	vpr-1
X0226	chrI	5904805	5905173	369	*	369	5902095	5904689	-	upstream	-116	116	NearestLocation	1.52299	2.65288	4.3979	WBGene00004109	stam-1
X0227	chrI	5997392	5998781	1390	*	1390	5992670	6001099	-	inside	3707	2318	NearestLocation	1.95541	6.40463	8.47915	WBGene00006823	unc-94
X0228	chrI	5999678	5999981	304	*	304	5992670	6001099	-	inside	1421	1118	NearestLocation	1.42173	1.28739	2.85498	WBGene00006823	unc-94
X0229	chrI	6011152	6011559	408	*	408	6009781	6011523	-	overlapStart	371	36	NearestLocation	1.46882	1.40664	2.99201	WBGene00004380	rnf-1
X0230	chrI	6061706	6062203	498	*	498	6058449	6061033	-	upstream	-673	673	NearestLocation	1.452	1.32509	2.89945	WBGene00016158	ari-1
X0231	chrI	6075980	6076260	281	*	281	6070303	6078847	-	inside	2867	2587	NearestLocation	1.62177	3.00395	4.78958	WBGene00022750	ZK484.4
X0232	chrI	6093351	6093652	302	*	302	6093305	6094419	+	inside	46	46	NearestLocation	1.52551	13.7006	16.3627	WBGene00022748	oaz-1
X0233	chrI	6107555	6108035	481	*	481	6105862	6107715	-	overlapStart	160	160	NearestLocation	1.53424	1.86788	3.51723	WBGene00020842	T27A3.6
X0234	chrI	6117613	6118776	1164	*	1164	6122590	6126854	+	upstream	-4977	3814	NearestLocation	1.71235	3.40237	5.22204	WBGene00020838	trak-1
X0235	chrI	6119082	6119904	823	*	823	6122590	6126854	+	upstream	-3508	2686	NearestLocation	1.61754	2.41391	4.1314	WBGene00020838	trak-1
X0236	chrI	6120496	6120902	407	*	407	6122590	6126854	+	upstream	-2094	1688	NearestLocation	1.70509	3.27683	5.08403	WBGene00020838	trak-1
X0237	chrI	6121841	6122226	386	*	386	6122590	6126854	+	upstream	-749	364	NearestLocation	1.61185	2.38084	4.09387	WBGene00020838	trak-1
X0238	chrI	6180263	6181834	1572	*	1572	6177983	6180840	-	overlapStart	577	577	NearestLocation	2.05076	9.97722	12.343	WBGene00020383	tin-44
X0239	chrI	6182791	6183528	738	*	738	6181314	6183880	-	inside	1089	352	NearestLocation	1.66578	3.13497	4.93653	WBGene00000500	chn-1
X0240	chrI	6183747	6184298	552	*	552	6181314	6183880	-	overlapStart	133	133	NearestLocation	1.4185	1.85478	3.5002	WBGene00000500	chn-1
X0241	chrI	6210110	6210527	418	*	418	6206954	6211155	-	inside	1045	628	NearestLocation	1.60252	3.83222	5.69749	WBGene00020347	ech-1.2
X0242	chrI	6216379	6216677	299	*	299	6215669	6219911	+	inside	710	710	NearestLocation	1.4054	6.93599	9.06986	WBGene00020346	T08B2.5
X0243	chrI	6224267	6224541	275	*	275	6225096	6225964	+	upstream	-829	555	NearestLocation	1.43876	3.97167	5.84734	WBGene00020345	T08B2.4
X0244	chrI	6252985	6253510	526	*	526	6253019	6253583	+	overlapStart	-34	34	NearestLocation	1.81275	4.64139	6.5889	WBGene00016754	cebp-2
X0245	chrI	6340701	6341854	1154	*	1154	6342231	6356678	+	upstream	-1530	377	NearestLocation	1.72657	3.45629	5.28763	WBGene00000254	bli-4
X0246	chrI	6358895	6359178	284	*	284	6358602	6360460	+	inside	293	293	NearestLocation	1.62809	2.88754	4.66235	WBGene00019396	K04F10.3
X0247	chrI	6365072	6365496	425	*	425	6364918	6366228	+	inside	154	154	NearestLocation	1.51192	1.53307	3.13963	WBGene00019394	K04F10.1
X0248	chrI	6379309	6379910	602	*	602	6375006	6375564	-	upstream	-3745	3745	NearestLocation	1.65366	3.07839	4.86768	WBGene00195486	ZC308.5
X0249	chrI	6388968	6389259	292	*	292	6386148	6392524	-	inside	3556	2820	NearestLocation	1.82226	16.5776	19.4636	WBGene00022592	klu-2
X0250	chrI	6398105	6398387	283	*	283	6402649	6402806	+	upstream	-4544	4262	NearestLocation	1.51436	9.22081	11.5336	WBGene00196705	ZC328.6
X0251	chrI	6459719	6460292	574	*	574	6460433	6464263	+	upstream	-714	141	NearestLocation	1.39874	1.82582	3.46766	WBGene00019432	knl-2
X0252	chrI	6494358	6494644	287	*	287	6494280	6496107	+	inside	78	78	NearestLocation	1.47529	1.73255	3.36219	WBGene00016944	uri-1
X0253	chrI	6555578	6555991	414	*	414	6554729	6558593	+	inside	849	849	NearestLocation	1.43395	1.33481	2.9097	WBGene00006607	tre-1
X0254	chrI	6561966	6562343	378	*	378	6562649	6562669	+	upstream	-683	306	NearestLocation	1.62607	3.26208	5.06192	WBGene00173303	21ur-14797
X0255	chrI	6562560	6562926	367	*	367	6562649	6562669	+	includeFeature	-89	89	NearestLocation	1.56655	3.12056	4.91538	WBGene00173303	21ur-14797
X0256	chrI	6563337	6564442	1106	*	1106	6563640	6564453	-	overlapEnd	1116	11	NearestLocation	1.54245	2.57753	4.30068	WBGene00000236	bag-1
X0257	chrI	6568942	6570727	1786	*	1786	6569494	6572600	+	overlapStart	-552	552	NearestLocation	1.71224	5.65428	7.66864	WBGene00019001	ipgm-1
X0258	chrI	6571435	6572798	1364	*	1364	6574004	6585175	+	upstream	-2569	1206	NearestLocation	1.55426	2.81233	4.56183	WBGene00002783	let-607
X0259	chrI	6573388	6573666	279	*	279	6574004	6585175	+	upstream	-616	338	NearestLocation	1.64685	6.63287	8.74692	WBGene00002783	let-607
X0260	chrI	6582125	6582489	365	*	365	6581853	6582000	-	upstream	-125	125	NearestLocation	1.39677	1.27902	2.84569	WBGene00197712	F48A9.4
X0261	chrI	6717463	6717753	291	*	291	6717819	6719903	+	upstream	-356	66	NearestLocation	1.4825	1.81726	3.46102	WBGene00020709	T23B3.1
X0262	chrI	6721688	6722020	333	*	333	6719368	6723061	-	inside	1373	1041	NearestLocation	1.52928	1.80236	3.44252	WBGene00020933	W02D3.4
X0263	chrI	6777734	6778183	450	*	450	6773994	6780151	-	inside	2417	1968	NearestLocation	1.48299	1.78505	3.4212	WBGene00004111	pqn-21
X0264	chrI	6789341	6789680	340	*	340	6789060	6789738	-	inside	397	58	NearestLocation	1.32721	7.37021	9.52277	WBGene00016493	C37A2.7
X0265	chrI	6794449	6794749	301	*	301	6791025	6797470	+	inside	3424	2721	NearestLocation	1.23555	2.15697	3.84491	WBGene00004110	pqn-20
X0266	chrI	6913969	6914777	809	*	809	6915049	6916592	+	upstream	-1080	272	NearestLocation	1.473	2.29163	3.98997	WBGene00016741	C48B6.3
X0267	chrI	6929919	6931107	1189	*	1189	6931138	6936936	+	upstream	-1219	31	NearestLocation	1.61252	2.4165	4.12802	WBGene00020398	T10B11.2
X0268	chrI	6942942	6943568	627	*	627	6940220	6941990	-	upstream	-952	952	NearestLocation	1.6018	2.27793	3.97928	WBGene00020401	T10B11.5
X0269	chrI	6945110	6946569	1460	*	1460	6942701	6945360	-	overlapStart	250	250	NearestLocation	1.8848	6.06028	8.12332	WBGene00020402	T10B11.6
X0270	chrI	6969144	6969757	614	*	614	6967668	6970190	-	inside	1046	433	NearestLocation	1.5102	1.51597	3.12075	WBGene00016261	C30F12.2
X0271	chrI	7054863	7055480	618	*	618	7053688	7054906	-	overlapStart	43	43	NearestLocation	1.60576	2.35098	4.06191	WBGene00044988	W01A8.8
X0272	chrI	7081307	7081609	303	*	303	7079911	7082020	-	inside	713	411	NearestLocation	1.67275	17.3229	20.2632	WBGene00009050	F22D6.2
X0273	chrI	7082911	7083203	293	*	293	7079911	7082020	-	upstream	-891	891	NearestLocation	1.39377	9.37179	11.6877	WBGene00009050	F22D6.2
X0274	chrI	7084427	7084733	307	*	307	7079911	7082020	-	upstream	-2407	2407	NearestLocation	1.25595	4.67404	6.60711	WBGene00009050	F22D6.2
X0275	chrI	7087661	7087941	281	*	281	7088022	7090062	-	downstream	2401	81	NearestLocation	1.36423	8.81204	11.0828	WBGene00003815	nars-1
X0276	chrI	7090595	7090948	354	*	354	7090623	7091371	+	overlapStart	-28	28	NearestLocation	1.58252	4.67814	6.61952	WBGene00009051	nduf-6
X0277	chrI	7094371	7094765	395	*	395	7091317	7094748	-	overlapStart	377	17	NearestLocation	2.02878	9.94185	12.3034	WBGene00004186	prpf-4
X0278	chrI	7095122	7095732	611	*	611	7095484	7098406	+	overlapStart	-362	248	NearestLocation	1.46903	2.26482	3.95975	WBGene00009052	ekl-1
X0279	chrI	7177165	7177455	291	*	291	7176696	7176842	-	upstream	-323	323	NearestLocation	1.63831	2.60211	4.34115	WBGene00199992	M05B5.9
X0280	chrI	7283045	7283837	793	*	793	7282960	7283818	-	overlapStart	773	19	NearestLocation	1.77207	5.05208	7.03092	WBGene00009004	pfd-6
X0281	chrI	7302561	7303090	530	*	530	7301008	7303227	-	inside	666	137	NearestLocation	1.54414	2.10409	3.77702	WBGene00008765	ttx-7
X0282	chrI	7313785	7314217	433	*	433	7313585	7314279	-	inside	494	62	NearestLocation	1.39626	1.89801	3.55084	WBGene00008768	F13G3.10
X0283	chrI	7321270	7321583	314	*	314	7318299	7321085	-	upstream	-185	185	NearestLocation	1.46882	1.49098	3.08735	WBGene00001680	gpb-2
X0284	chrI	7324795	7325082	288	*	288	7322330	7323590	-	upstream	-1205	1205	NearestLocation	2.00563	12.6785	15.2624	WBGene00009916	F52A8.3
X0285	chrI	7347263	7347782	520	*	520	7345942	7347374	-	overlapStart	111	111	NearestLocation	1.49553	2.44043	4.1532	WBGene00009918	F52A8.5
X0286	chrI	7550164	7550565	402	*	402	7552975	7554553	+	upstream	-2811	2410	NearestLocation	1.48287	2.99531	4.77898	WBGene00012029	T25G3.1
X0287	chrI	7553356	7553649	294	*	294	7552975	7554553	+	inside	381	381	NearestLocation	1.70602	4.26206	6.1718	WBGene00012029	T25G3.1
X0288	chrI	7553952	7554405	454	*	454	7554892	7559916	+	upstream	-940	487	NearestLocation	1.46168	1.67459	3.29705	WBGene00000496	chs-1
X0289	chrI	7562547	7563814	1268	*	1268	7564584	7567718	+	upstream	-2037	770	NearestLocation	1.48766	2.26759	3.96482	WBGene00012031	T25G3.4
X0290	chrI	7569867	7571283	1417	*	1417	7567821	7571250	-	overlapStart	1383	33	NearestLocation	1.51566	2.70217	4.44579	WBGene00008411	mans-1
X0291	chrI	7594600	7595365	766	*	766	7596507	7602203	+	upstream	-1907	1142	NearestLocation	1.65524	4.13472	6.0108	WBGene00008419	wdr-23
X0292	chrI	7596865	7597162	298	*	298	7596507	7602203	+	inside	358	358	NearestLocation	1.60688	15.0609	17.8276	WBGene00008419	wdr-23
X0293	chrI	7657770	7658861	1092	*	1092	7656907	7658291	-	overlapStart	521	521	NearestLocation	1.67131	2.97268	4.75031	WBGene00009142	F26A3.4
X0294	chrI	7659305	7662612	3308	*	3308	7656907	7658291	-	upstream	-1014	1014	NearestLocation	1.77314	5.0699	7.04257	WBGene00009142	F26A3.4
X0295	chrI	7678586	7679685	1100	*	1100	7679454	7683037	+	overlapStart	-868	231	NearestLocation	1.55143	2.12865	3.81055	WBGene00011972	T23G11.7
X0296	chrI	7686271	7686577	307	*	307	7684882	7689403	-	inside	3132	1389	NearestLocation	1.56443	1.95159	3.61371	WBGene00011971	lron-9
X0297	chrI	7706885	7707163	279	*	279	7704572	7707049	-	overlapStart	164	114	NearestLocation	1.43773	2.38469	4.09818	WBGene00009188	lsy-22
X0298	chrI	7724431	7725545	1115	*	1115	7723750	7724654	-	overlapStart	223	223	NearestLocation	1.40965	1.82408	3.46018	WBGene00009191	F27D4.7
X0299	chrI	7835528	7835997	470	*	470	7835814	7836968	+	overlapStart	-286	183	NearestLocation	1.38068	1.41265	2.99959	WBGene00009272	gras-1
X0300	chrI	7859692	7859988	297	*	297	7859940	7860105	-	overlapEnd	413	48	NearestLocation	1.58747	15.2127	17.9942	WBGene00220041	R11A5.8
X0301	chrI	7913983	7914293	311	*	311	7906813	7914116	-	overlapStart	133	133	NearestLocation	1.67432	14.452	17.1703	WBGene00010113	F55D12.5
X0302	chrI	7925979	7926369	391	*	391	7918442	7926337	-	overlapStart	358	32	NearestLocation	1.71857	4.17435	6.07558	WBGene00008990	smgl-1
X0303	chrI	7962044	7962473	430	*	430	7962052	7972441	+	overlapStart	-8	8	NearestLocation	1.80567	4.76847	6.7219	WBGene00004318	rbg-2
X0304	chrI	8010681	8010994	314	*	314	8010207	8010366	-	upstream	-315	315	NearestLocation	1.73806	14.1161	16.8096	WBGene00219863	C54G4.16
X0305	chrI	8011467	8011987	521	*	521	8010207	8010366	-	upstream	-1101	1101	NearestLocation	1.87713	5.28298	7.26971	WBGene00219863	C54G4.16
X0306	chrI	8016690	8017474	785	*	785	8019501	8022715	+	upstream	-2811	2027	NearestLocation	1.72318	3.51851	5.34341	WBGene00008317	C54G4.7
X0307	chrI	8018334	8019848	1515	*	1515	8019501	8022715	+	overlapStart	-1167	347	NearestLocation	1.59995	3.17083	4.95356	WBGene00008317	C54G4.7
X0308	chrI	8028751	8029040	290	*	290	8026606	8028752	-	overlapStart	1	1	NearestLocation	1.47459	11.7971	14.3017	WBGene00010560	iftb-1
X0309	chrI	8135605	8135968	364	*	364	8135840	8135955	+	includeFeature	-235	13	NearestLocation	1.3756	1.87384	3.52436	WBGene00220106	T28B8.11
X0310	chrI	8254632	8254973	342	*	342	8253374	8254926	-	overlapStart	294	47	NearestLocation	1.37712	1.3331	2.90829	WBGene00044094	fitm-2
X0311	chrI	8305440	8305723	284	*	284	8305488	8305702	+	includeFeature	-48	21	NearestLocation	1.49141	12.2003	14.7426	WBGene00198101	F52B5.9
X0312	chrI	8390498	8391993	1496	*	1496	8390652	8390713	-	includeFeature	215	154	NearestLocation	1.51824	1.76138	3.39729	WBGene00198884	T19A6.5
X0312	chrI	8390498	8391993	1496	*	1496	8390652	8390713	+	includeFeature	-154	154	NearestLocation	1.51824	1.76138	3.39729	WBGene00199915	T19A6.6
X0313	chrI	8393351	8393651	301	*	301	8377602	8392753	-	upstream	-598	598	NearestLocation	1.47606	2.0653	3.73836	WBGene00011827	T19A6.1
X0314	chrI	8394418	8394800	383	*	383	8394728	8398628	+	overlapStart	-310	72	NearestLocation	1.77203	4.12159	6.01516	WBGene00003596	ngp-1
X0315	chrI	8410670	8411746	1077	*	1077	8407802	8410804	-	overlapStart	134	134	NearestLocation	1.48779	2.78263	4.54026	WBGene00003014	lin-28
X0316	chrI	8412553	8413325	773	*	773	8413260	8416196	+	overlapStart	-707	65	NearestLocation	1.42936	2.46337	4.17091	WBGene00008531	F02E9.7
X0317	chrI	8427195	8427860	666	*	666	8424999	8426084	-	upstream	-1111	1111	NearestLocation	1.48379	2.74498	4.49426	WBGene00008530	F02E9.5
X0318	chrI	8511012	8511391	380	*	380	8509115	8511412	-	inside	400	21	NearestLocation	1.44683	2.62622	4.37123	WBGene00010496	sec-12
X0319	chrI	8529060	8530021	962	*	962	8526747	8529271	-	overlapStart	211	211	NearestLocation	1.50976	2.90219	4.67396	WBGene00010500	K02B12.7
X0320	chrI	8614337	8615138	802	*	802	8612728	8615131	-	overlapStart	794	7	NearestLocation	1.36424	1.95216	3.60875	WBGene00009666	F43G9.3
X0321	chrI	8636976	8637558	583	*	583	8636120	8637961	-	inside	985	403	NearestLocation	1.51034	3.33156	5.13722	WBGene00000777	cpn-1
X0322	chrI	8639818	8640186	369	*	369	8638510	8640236	-	inside	418	50	NearestLocation	1.40488	1.33064	2.9046	WBGene00009671	mfap-1
X0323	chrI	8640495	8641073	579	*	579	8640509	8644399	+	overlapStart	-14	14	NearestLocation	1.51047	2.14628	3.83167	WBGene00009672	F43G9.12
X0324	chrI	8642056	8643014	959	*	959	8644475	8646306	+	upstream	-2419	1461	NearestLocation	1.65116	2.75042	4.50232	WBGene00012150	syx-17
X0325	chrI	8660812	8661300	489	*	489	8660820	8663376	+	overlapStart	-8	8	NearestLocation	1.67388	2.96964	4.7488	WBGene00045237	mrt-1
X0326	chrI	8664416	8664786	371	*	371	8664953	8666497	+	upstream	-537	167	NearestLocation	1.82721	12.3501	14.8968	WBGene00009563	F39H2.3
X0327	chrI	8674218	8674506	289	*	289	8669978	8673548	-	upstream	-670	670	NearestLocation	1.75002	17.1322	20.0652	WBGene00086557	K07A12.8
X0328	chrI	8696018	8696366	349	*	349	8695203	8696376	-	inside	358	10	NearestLocation	1.42855	2.66019	4.3995	WBGene00003953	pbs-7
X0329	chrI	8702221	8702748	528	*	528	8702478	8705796	+	overlapStart	-257	257	NearestLocation	1.42624	2.15687	3.84224	WBGene00000409	cdk-8
X0330	chrI	8742266	8742690	425	*	425	8743849	8746925	-	downstream	4659	1159	NearestLocation	1.81819	4.64809	6.57988	WBGene00007976	C36B1.9
X0331	chrI	8759441	8759848	408	*	408	8759193	8759790	-	overlapStart	349	58	NearestLocation	1.46375	3.25938	5.06809	WBGene00006574	tin-13
X0332	chrI	8761035	8761325	291	*	291	8759193	8759790	-	upstream	-1245	1245	NearestLocation	1.75162	15.8305	18.6568	WBGene00006574	tin-13
X0333	chrI	8786238	8786720	483	*	483	8779737	8785415	-	upstream	-823	823	NearestLocation	1.50202	1.56663	3.17465	WBGene00008439	mfb-1
X0334	chrI	8813647	8814011	365	*	365	8813761	8815196	+	overlapStart	-114	114	NearestLocation	1.40056	2.21861	3.90963	WBGene00009454	F36A2.7
X0335	chrI	8829834	8830445	612	*	612	8826166	8826653	-	upstream	-3181	3181	NearestLocation	1.57804	2.11425	3.79416	WBGene00009459	F36A2.12
X0336	chrI	8850993	8851374	382	*	382	8845807	8851118	-	overlapStart	125	125	NearestLocation	1.74194	3.73083	5.57731	WBGene00002035	hum-1
X0337	chrI	8851627	8852655	1029	*	1029	8852705	8852765	+	upstream	-1078	50	NearestLocation	1.61106	2.66006	4.39845	WBGene00199362	F29D10.7
X0338	chrI	8865056	8865639	584	*	584	8863996	8865545	-	overlapStart	489	94	NearestLocation	1.6469	2.69737	4.44692	WBGene00219283	F55H12.7
X0339	chrI	8865901	8866378	478	*	478	8865945	8866624	+	overlapStart	-44	44	NearestLocation	1.77452	4.07866	5.95986	WBGene00219592	linc-84
X0340	chrI	8866831	8867333	503	*	503	8866808	8866973	+	overlapEnd	23	23	NearestLocation	1.52631	1.64913	3.271	WBGene00219976	F55H12.9
X0341	chrI	8905398	8905993	596	*	596	8902746	8905534	-	overlapStart	136	136	NearestLocation	1.60784	2.61977	4.35819	WBGene00011631	T08G11.4
X0342	chrI	8916496	8916846	351	*	351	8905639	8916805	-	overlapStart	309	41	NearestLocation	1.60618	2.31803	4.02361	WBGene00011629	T08G11.1
X0343	chrI	8918071	8918432	362	*	362	8917852	8918001	+	downstream	219	70	NearestLocation	1.45644	1.73064	3.36274	WBGene00199622	T08G11.9
X0344	chrI	9004224	9004513	290	*	290	9004497	9004517	-	overlapEnd	293	4	NearestLocation	1.50882	1.55685	3.16611	WBGene00169515	21ur-14332
X0345	chrI	9053870	9054180	311	*	311	9055149	9055262	-	downstream	1392	969	NearestLocation	2.0326	19.2973	22.4202	WBGene00004838	sls-2.6
X0346	chrI	9064222	9064497	276	*	276	9063715	9064398	-	overlapStart	176	99	NearestLocation	1.59468	15.5151	18.3186	WBGene00006503	snx-3
X0347	chrI	9076150	9076425	276	*	276	9070399	9075077	-	upstream	-1073	1073	NearestLocation	1.56312	5.58834	7.61032	WBGene00011531	rsbp-1
X0348	chrI	9085103	9085381	279	*	279	9085351	9085855	-	overlapEnd	752	30	NearestLocation	2.10272	23.9245	27.4223	WBGene00077558	T06D10.3
X0349	chrI	9092403	9093420	1018	*	1018	9095957	9100186	+	upstream	-3554	2537	NearestLocation	1.67728	3.00115	4.78067	WBGene00003182	mef-2
X0350	chrI	9094058	9094368	311	*	311	9095957	9100186	+	upstream	-1899	1589	NearestLocation	1.65111	9.54444	11.8852	WBGene00003182	mef-2
X0351	chrI	9095359	9096103	745	*	745	9095957	9100186	+	overlapStart	-598	146	NearestLocation	1.63544	2.80193	4.56404	WBGene00003182	mef-2
X0352	chrI	9097085	9097665	581	*	581	9095957	9100186	+	inside	1128	1128	NearestLocation	1.51376	1.71994	3.34911	WBGene00003182	mef-2
X0353	chrI	9098742	9099026	285	*	285	9099016	9099154	-	overlapEnd	412	10	NearestLocation	1.67036	16.4023	19.2769	WBGene00196398	W10D5.4
X0354	chrI	9105663	9105937	275	*	275	9106600	9106697	-	downstream	1034	663	NearestLocation	1.45021	8.2327	10.4704	WBGene00220127	W10D5.5
X0355	chrI	9132336	9132666	331	*	331	9132538	9135749	+	overlapStart	-202	128	NearestLocation	1.5871	2.64146	4.38101	WBGene00003209	mel-26
X0356	chrI	9171351	9171688	338	*	338	9168432	9177497	+	inside	2919	2919	NearestLocation	1.77688	17.058	19.978	WBGene00009126	pyk-1
X0357	chrI	9172041	9172340	300	*	300	9168432	9177497	+	inside	3609	3609	NearestLocation	1.52963	5.14027	7.12291	WBGene00009126	pyk-1
X0358	chrI	9172626	9172952	327	*	327	9176327	9176453	+	upstream	-3701	3375	NearestLocation	1.79451	18.7946	21.8637	WBGene00045376	F25H5.9
X0359	chrI	9173894	9174191	298	*	298	9176327	9176453	+	upstream	-2433	2136	NearestLocation	1.51961	9.39049	11.7131	WBGene00045376	F25H5.9
X0360	chrI	9182882	9183161	280	*	280	9179973	9181003	-	upstream	-1879	1879	NearestLocation	1.59588	11.8879	14.4098	WBGene00009125	F25H5.2
X0361	chrI	9233620	9233917	298	*	298	9232067	9233562	-	upstream	-58	58	NearestLocation	1.66311	2.79919	4.56442	WBGene00000147	aph-1
X0362	chrI	9240547	9241525	979	*	979	9234171	9245924	-	inside	5377	4399	NearestLocation	1.73309	3.59314	5.42865	WBGene00009498	tat-5
X0363	chrI	9278913	9279214	302	*	302	9271443	9278689	-	upstream	-224	224	NearestLocation	1.70648	3.23928	5.04867	WBGene00008780	hxk-1
X0364	chrI	9279846	9281019	1174	*	1174	9271443	9278689	-	upstream	-1157	1157	NearestLocation	1.83647	6.19199	8.25285	WBGene00008780	hxk-1
X0365	chrI	9331671	9331946	276	*	276	9332534	9332649	-	downstream	978	588	NearestLocation	1.64385	10.1921	12.5824	WBGene00219811	C12C8.8
X0366	chrI	9343738	9344035	298	*	298	9334850	9342496	-	upstream	-1242	1242	NearestLocation	1.509	10.1288	12.5094	WBGene00003026	lin-41
X0367	chrI	9380216	9380521	306	*	306	9380354	9380499	+	includeFeature	-138	22	NearestLocation	1.55581	12.7661	15.3524	WBGene00200365	F16A11.8
X0368	chrI	9382939	9383219	281	*	281	9382980	9383170	+	includeFeature	-41	41	NearestLocation	1.34655	3.41882	5.25161	WBGene00199346	F16A11.7
X0368	chrI	9382939	9383219	281	*	281	9382980	9383170	-	includeFeature	231	41	NearestLocation	1.34655	3.41882	5.25161	WBGene00201192	F16A11.9
X0369	chrI	9383777	9384091	315	*	315	9382980	9383170	-	upstream	-607	607	NearestLocation	1.51052	9.03433	11.3384	WBGene00201192	F16A11.9
X0370	chrI	9398255	9400051	1797	*	1797	9393944	9404024	-	inside	5769	3973	NearestLocation	1.57808	2.74771	4.49019	WBGene00008876	F16A11.1
X0371	chrI	9424439	9424883	445	*	445	9425033	9425233	-	downstream	794	150	NearestLocation	1.30985	5.08788	7.05126	WBGene00196780	C17E4.15
X0372	chrI	9487381	9489195	1815	*	1815	9488488	9492623	+	overlapStart	-1107	707	NearestLocation	1.67231	4.07864	5.95535	WBGene00009264	sac-1
X0373	chrI	9496818	9497124	307	*	307	9492630	9494589	-	upstream	-2229	2229	NearestLocation	1.79922	4.89064	6.85822	WBGene00009262	F30A10.3
X0374	chrI	9584936	9585640	705	*	705	9585317	9587206	+	overlapStart	-381	323	NearestLocation	1.5335	2.63772	4.37648	WBGene00010609	dut-1
X0375	chrI	9610129	9610408	280	*	280	9608926	9609705	-	upstream	-424	424	NearestLocation	1.63921	15.2406	18.0232	WBGene00010619	K07A1.15
X0376	chrI	9630953	9631449	497	*	497	9631386	9632733	+	overlapStart	-433	63	NearestLocation	1.69326	3.77005	5.62199	WBGene00011490	T05F1.4
X0377	chrI	9729832	9730217	386	*	386	9731348	9731484	-	downstream	1652	1131	NearestLocation	1.45576	6.23956	8.29498	WBGene00202237	C16C2.10
X0378	chrI	9737852	9738482	631	*	631	9737823	9744122	+	inside	29	29	NearestLocation	1.88455	5.69626	7.72726	WBGene00001582	gfi-2
X0379	chrI	9753417	9754179	763	*	763	9754122	9757898	+	overlapStart	-705	57	NearestLocation	1.409	1.31621	2.8884	WBGene00006352	sur-6
X0380	chrI	9772551	9772831	281	*	281	9771063	9772565	-	overlapStart	14	14	NearestLocation	1.24326	3.90061	5.78076	WBGene00009159	F26E4.4
X0381	chrI	9789011	9789932	922	*	922	9789221	9789490	+	includeFeature	-210	210	NearestLocation	1.88937	24.9777	28.556	WBGene00197303	F26E4.16
X0382	chrI	9851167	9851796	630	*	630	9850020	9851791	-	overlapStart	624	5	NearestLocation	1.40394	7.00087	9.1447	WBGene00010730	ensa-1
X0383	chrI	9862222	9863664	1443	*	1443	9863588	9869100	+	overlapStart	-1366	76	NearestLocation	1.91141	6.16631	8.23039	WBGene00010732	K10C3.5
X0384	chrI	9881456	9882598	1143	*	1143	9879189	9881504	-	overlapStart	48	48	NearestLocation	1.68542	3.37307	5.1752	WBGene00003659	nhr-69
X0385	chrI	9901054	9901329	276	*	276	9901279	9902935	+	overlapStart	-225	50	NearestLocation	1.61723	3.78839	5.65185	WBGene00009937	lsl-1
X0386	chrI	9929221	9930282	1062	*	1062	9928979	9930893	+	inside	242	242	NearestLocation	1.60518	3.03321	4.8142	WBGene00009940	strl-1
X0387	chrI	10040403	10040679	277	*	277	10040005	10040223	-	upstream	-180	180	NearestLocation	1.51492	6.76133	8.86642	WBGene00196679	F10G8.11
X0388	chrI	10041559	10042091	533	*	533	10040005	10040223	-	upstream	-1336	1336	NearestLocation	1.49156	2.2916	3.98301	WBGene00196679	F10G8.11
X0389	chrI	10045396	10045817	422	*	422	10046440	10048028	+	upstream	-1044	623	NearestLocation	1.43728	1.46419	3.05528	WBGene00008664	nubp-1
X0390	chrI	10102105	10104139	2035	*	2035	10102230	10102353	-	includeFeature	248	125	NearestLocation	1.8016	5.1103	7.05346	WBGene00197704	B0379.11
X0391	chrI	10104684	10105941	1258	*	1258	10103538	10103626	+	downstream	1146	1058	NearestLocation	1.75642	3.87922	5.73818	WBGene00219788	B0379.13
X0392	chrI	10120094	10120462	369	*	369	10118080	10119436	-	upstream	-658	658	NearestLocation	1.51635	1.57111	3.1824	WBGene00013702	Y106G6D.6
X0393	chrI	10120980	10122175	1196	*	1196	10119209	10122078	-	overlapStart	1098	97	NearestLocation	1.79135	5.79561	7.83097	WBGene00014965	Y106G6D.5
X0394	chrI	10122498	10122940	443	*	443	10122471	10130216	+	inside	27	27	NearestLocation	1.50181	2.98252	4.75298	WBGene00013703	Y106G6D.7
X0395	chrI	10123211	10124403	1193	*	1193	10122471	10130216	+	inside	740	740	NearestLocation	1.68116	3.0292	4.81408	WBGene00013703	Y106G6D.7
X0396	chrI	10155101	10155377	277	*	277	10155284	10158497	+	overlapStart	-183	93	NearestLocation	1.42127	7.66548	9.85035	WBGene00023415	F16C3.3
X0397	chrI	10175181	10175491	311	*	311	10175319	10175461	-	includeFeature	280	30	NearestLocation	1.43419	9.33085	11.6578	WBGene00077527	C25A1.17
X0398	chrI	10227281	10227578	298	*	298	10222880	10227486	-	overlapStart	205	92	NearestLocation	1.70729	3.22702	5.03757	WBGene00000426	ced-12
X0399	chrI	10331962	10333403	1442	*	1442	10331962	10333096	-	overlapStart	1134	0	NearestLocation	1.5566	3.36012	5.17315	WBGene00013892	ZC434.4
X0400	chrI	10340401	10340683	283	*	283	10340997	10345651	+	upstream	-596	314	NearestLocation	1.35145	5.1809	7.17452	WBGene00000148	aph-2
X0401	chrI	10373582	10374378	797	*	797	10373370	10374300	-	overlapStart	718	78	NearestLocation	1.39082	1.78443	3.42221	WBGene00003587	ned-8
X0402	chrI	10374669	10375298	630	*	630	10374814	10379626	+	overlapStart	-145	145	NearestLocation	1.5376	2.00815	3.67199	WBGene00009744	hpo-35
X0403	chrI	10399965	10400712	748	*	748	10400397	10400619	-	includeFeature	654	93	NearestLocation	1.41077	2.28171	3.98204	WBGene00201075	F25D7.9
X0404	chrI	10401771	10402055	285	*	285	10401067	10402774	+	inside	704	704	NearestLocation	1.46518	8.31905	10.5544	WBGene00009112	tag-353
X0405	chrI	10409252	10409580	329	*	329	10409359	10414707	+	overlapStart	-107	107	NearestLocation	1.67158	17.4403	20.3952	WBGene00003847	blmp-1
X0406	chrI	10518301	10518614	314	*	314	10518379	10519262	+	overlapStart	-78	78	NearestLocation	1.48903	2.20947	3.89825	WBGene00010325	exos-3
X0407	chrI	10538022	10540035	2014	*	2014	10536066	10538086	-	overlapStart	64	64	NearestLocation	1.66411	3.17675	4.96666	WBGene00006578	tli-1
X0408	chrI	10541132	10541521	390	*	390	10543024	10546425	+	upstream	-1892	1503	NearestLocation	1.57218	2.02561	3.69566	WBGene00009116	snx-27
X0409	chrI	10542370	10543786	1417	*	1417	10543024	10546425	+	overlapStart	-654	654	NearestLocation	1.83336	4.87632	6.83654	WBGene00009116	snx-27
X0410	chrI	10553158	10553449	292	*	292	10553112	10553913	-	inside	755	46	NearestLocation	1.30688	6.39729	8.47719	WBGene00009119	ndk-1
X0411	chrI	10561068	10561346	279	*	279	10562970	10564914	+	upstream	-1902	1624	NearestLocation	1.44837	10.5805	12.9959	WBGene00006720	ubc-25
X0412	chrI	10568704	10568988	285	*	285	10569112	10570030	+	upstream	-408	124	NearestLocation	1.25783	4.45159	6.37565	WBGene00009122	tct-1
X0413	chrI	10638375	10638719	345	*	345	10636693	10638977	-	inside	602	258	NearestLocation	1.73938	7.92015	10.12	WBGene00044321	mrps-30
X0414	chrI	10682155	10682485	331	*	331	10676921	10682374	-	overlapStart	219	111	NearestLocation	1.64985	18.5007	21.5461	WBGene00016391	C34B2.6
X0415	chrI	10726292	10726888	597	*	597	10726918	10727351	+	upstream	-626	30	NearestLocation	1.49767	1.75335	3.38411	WBGene00044646	B0205.14
X0416	chrI	10728161	10729357	1197	*	1197	10727751	10728795	-	overlapStart	634	410	NearestLocation	1.82832	7.17147	9.30254	WBGene00044644	B0205.13
X0417	chrI	10729710	10729997	288	*	288	10728895	10730237	-	inside	527	240	NearestLocation	1.4871	9.95144	12.3206	WBGene00015022	B0205.8
X0418	chrI	10731067	10731392	326	*	326	10730467	10730712	+	downstream	600	355	NearestLocation	1.68789	17.5878	20.555	WBGene00044413	B0205.12
X0419	chrI	10750667	10751238	572	*	572	10750563	10750705	-	overlapStart	38	38	NearestLocation	1.46137	1.7953	3.43191	WBGene00201753	H36N01.5
X0420	chrI	10757047	10757536	490	*	490	10757145	10757203	-	includeFeature	156	98	NearestLocation	1.41745	9.1466	11.4574	WBGene00200840	R13H8.4
X0421	chrI	10760237	10760614	378	*	378	10757145	10757203	-	upstream	-3034	3034	NearestLocation	1.43063	1.5622	3.16946	WBGene00200840	R13H8.4
X0422	chrI	10765554	10766099	546	*	546	10770088	10770210	-	downstream	4656	3989	NearestLocation	1.37492	7.03299	9.1777	WBGene00201678	R13H8.5
X0423	chrI	10925912	10926186	275	*	275	10924238	10925753	-	upstream	-159	159	NearestLocation	1.65224	11.3634	13.8426	WBGene00000780	cpn-4
X0424	chrI	10969945	10970638	694	*	694	10970493	10980111	+	overlapStart	-548	145	NearestLocation	1.61078	3.05047	4.83435	WBGene00013123	Y52B11A.3
X0425	chrI	11179217	11179588	372	*	372	11168607	11177726	-	upstream	-1491	1491	NearestLocation	1.21885	2.55775	4.28806	WBGene00009220	F28D9.4
X0426	chrI	11187513	11187819	307	*	307	11182817	11186137	+	downstream	4696	1376	NearestLocation	1.54971	2.92379	4.7005	WBGene00005517	sri-5
X0427	chrI	11190635	11190914	280	*	280	11182817	11186137	+	downstream	7818	4498	NearestLocation	1.86269	12.1569	14.6968	WBGene00005517	sri-5
X0428	chrI	11280621	11281002	382	*	382	11276492	11280020	-	upstream	-601	601	NearestLocation	1.25748	3.50406	5.32731	WBGene00009461	madf-2
X0429	chrI	11416073	11416645	573	*	573	11400612	11416420	-	overlapStart	347	225	NearestLocation	1.83825	5.78695	7.8325	WBGene00001215	ego-2
X0430	chrI	11577184	11577474	291	*	291	11572090	11577488	-	inside	304	14	NearestLocation	1.56899	4.01564	5.90517	WBGene00008856	F15D3.6
X0431	chrI	11578541	11579390	850	*	850	11578641	11579612	+	overlapStart	-100	100	NearestLocation	1.35863	6.836	8.95806	WBGene00008857	timm-23
X0432	chrI	11693359	11693680	322	*	322	11694722	11694997	-	downstream	1638	1042	NearestLocation	1.46919	1.24233	2.80312	WBGene00011934	T22H2.4
X0433	chrI	11702100	11702598	499	*	499	11701631	11703704	+	inside	469	469	NearestLocation	1.42082	6.12083	8.19544	WBGene00011936	pgrn-1
X0434	chrI	11840091	11840620	530	*	530	11837979	11838112	+	downstream	2112	1979	NearestLocation	1.6891	3.06599	4.85759	WBGene00201976	Y47H9C.20
X0435	chrI	11840974	11841447	474	*	474	11837979	11838112	+	downstream	2995	2862	NearestLocation	1.66694	2.93078	4.6983	WBGene00201976	Y47H9C.20
X0436	chrI	11893325	11893714	390	*	390	11891574	11893727	-	inside	402	13	NearestLocation	1.65532	3.09931	4.89458	WBGene00012950	Y47H9C.7
X0437	chrI	11923681	11924020	340	*	340	11917742	11923915	-	overlapStart	234	105	NearestLocation	2.05662	7.37541	9.54584	WBGene00011058	fdps-1
X0438	chrI	11924354	11924757	404	*	404	11917742	11923915	-	upstream	-439	439	NearestLocation	2.17426	9.12926	11.4316	WBGene00011058	fdps-1
X0439	chrI	11927186	11927462	277	*	277	11924785	11929507	-	inside	2321	2045	NearestLocation	1.737	8.43913	10.6919	WBGene00006958	wve-1
X0440	chrI	11928764	11929057	294	*	294	11924785	11929507	-	inside	743	450	NearestLocation	1.62565	16.4609	19.3369	WBGene00006958	wve-1
X0441	chrI	11931407	11931690	284	*	284	11930725	11931759	+	inside	682	69	NearestLocation	1.66094	14.5003	17.2252	WBGene00011059	R06C1.4
X0442	chrI	11934507	11934817	311	*	311	11933465	11933575	-	upstream	-932	932	NearestLocation	1.63032	10.0469	12.4227	WBGene00199432	R06C1.10
X0443	chrI	11937896	11938173	278	*	278	11933465	11933575	-	upstream	-4321	4321	NearestLocation	1.81483	4.29366	6.21426	WBGene00199432	R06C1.10
X0444	chrI	11965160	11965620	461	*	461	11966271	11967591	+	upstream	-1111	651	NearestLocation	1.58537	3.34884	5.1596	WBGene00014915	Y53C10A.1
X0445	chrI	12004816	12005110	295	*	295	12002562	12004997	-	overlapStart	181	113	NearestLocation	1.49062	9.38456	11.7145	WBGene00013137	Y53C10A.6
X0446	chrI	12041083	12041445	363	*	363	12041035	12042986	+	inside	48	48	NearestLocation	1.51823	14.0085	16.6901	WBGene00010244	F58D5.5
X0447	chrI	12426312	12426760	449	*	449	12424555	12426766	-	inside	454	6	NearestLocation	1.61921	2.49999	4.22518	WBGene00008476	E03H4.8
X0448	chrI	12429752	12430082	331	*	331	12430029	12431474	-	overlapEnd	1722	53	NearestLocation	1.98011	13.7264	16.3892	WBGene00008477	clec-17
X0449	chrI	12430294	12430570	277	*	277	12430029	12431474	-	inside	1180	265	NearestLocation	1.7765	6.61817	8.73794	WBGene00008477	clec-17
X0450	chrI	12494783	12495082	300	*	300	12494826	12497354	+	overlapStart	-43	43	NearestLocation	1.40206	8.25453	10.4784	WBGene00012106	T27F6.7
X0451	chrI	12523361	12523641	281	*	281	12521525	12521646	-	upstream	-1715	1715	NearestLocation	1.54192	11.6757	14.1756	WBGene00199394	K11D2.6
X0452	chrI	12524212	12524815	604	*	604	12521525	12521646	-	upstream	-2566	2566	NearestLocation	1.3039	4.39131	6.30887	WBGene00199394	K11D2.6
X0453	chrI	12551234	12551856	623	*	623	12551538	12552370	+	overlapStart	-304	304	NearestLocation	1.38079	7.01579	9.14783	WBGene00012216	W02D9.10
X0454	chrI	12568196	12568642	447	*	447	12564356	12565893	+	downstream	3840	2303	NearestLocation	1.29162	3.81422	5.66763	WBGene00008216	mec-19
X0455	chrI	12569018	12569299	282	*	282	12565799	12572801	-	inside	3783	3219	NearestLocation	1.33925	4.58747	6.51863	WBGene00001008	dlk-1
X0456	chrI	12572385	12572677	293	*	293	12565799	12572801	-	inside	416	124	NearestLocation	1.55589	11.9765	14.5038	WBGene00001008	dlk-1
X0457	chrI	12800170	12800445	276	*	276	12787943	12806581	-	inside	6411	6136	NearestLocation	1.49046	8.17468	10.398	WBGene00012474	attf-6
X0458	chrI	12825346	12825703	358	*	358	12825687	12834143	+	overlapStart	-341	16	NearestLocation	1.62705	2.51222	4.23967	WBGene00003735	nhx-8
X0459	chrI	12825986	12826931	946	*	946	12825687	12834143	+	inside	299	299	NearestLocation	1.8068	5.3279	7.32207	WBGene00003735	nhx-8
X0460	chrI	12827534	12827817	284	*	284	12825687	12834143	+	inside	1847	1847	NearestLocation	1.76045	11.1899	13.6524	WBGene00003735	nhx-8
X0461	chrI	12966025	12966498	474	*	474	12964679	12966876	-	inside	851	378	NearestLocation	1.1856	2.251	3.94415	WBGene00006529	tba-2
X0462	chrI	12969655	12970027	373	*	373	12968921	12970238	+	inside	734	211	NearestLocation	1.35058	7.35754	9.51723	WBGene00001234	eif-6
X0463	chrI	13002794	13003069	276	*	276	13004438	13023572	+	upstream	-1644	1369	NearestLocation	1.6791	7.39741	9.56735	WBGene00004063	pmr-1
X0464	chrI	13030877	13031888	1012	*	1012	13033520	13045537	+	upstream	-2643	1632	NearestLocation	1.55854	2.49479	4.21976	WBGene00012274	W05B5.1
X0465	chrI	13033104	13033383	280	*	280	13033520	13045537	+	upstream	-416	137	NearestLocation	1.66841	8.38155	10.6261	WBGene00012274	W05B5.1
X0466	chrI	13035807	13036336	530	*	530	13033520	13045537	+	inside	2287	2287	NearestLocation	1.56414	2.51991	4.24647	WBGene00012274	W05B5.1
X0467	chrI	13036634	13036958	325	*	325	13033520	13045537	+	inside	3114	3114	NearestLocation	1.89062	19.2483	22.347	WBGene00012274	W05B5.1
X0468	chrI	13159786	13160060	275	*	275	13161061	13161133	+	upstream	-1275	1001	NearestLocation	1.55095	11.3119	13.7881	WBGene00014344	F22G12.t1
X0469	chrI	13276960	13277325	366	*	366	13274111	13276462	+	downstream	2849	498	NearestLocation	1.54847	2.41804	4.12676	WBGene00010804	M01E5.1
X0470	chrI	13290906	13291183	278	*	278	13292514	13297227	+	upstream	-1608	1331	NearestLocation	1.53212	9.81269	12.1737	WBGene00006595	top-1
X0471	chrI	13339717	13340071	355	*	355	13340334	13343936	+	upstream	-617	263	NearestLocation	1.21417	2.80135	4.5572	WBGene00012344	ola-1
X0472	chrI	13348874	13349150	277	*	277	13349410	13358674	+	upstream	-536	260	NearestLocation	1.52036	1.70457	3.33083	WBGene00012734	Y40B1A.3
X0473	chrI	13350806	13351211	406	*	406	13349410	13358674	+	inside	1396	1396	NearestLocation	1.71721	4.77863	6.72473	WBGene00012734	Y40B1A.3
X0474	chrI	13368494	13369118	625	*	625	13369999	13370080	-	downstream	1586	881	NearestLocation	1.5773	4.13795	6.02026	WBGene00199416	Y40B1A.5
X0475	chrI	13369686	13370106	421	*	421	13369999	13370080	-	includeFeature	394	26	NearestLocation	1.45939	7.74044	9.93226	WBGene00199416	Y40B1A.5
X0476	chrI	13390612	13391801	1190	*	1190	13392118	13394001	+	upstream	-1506	317	NearestLocation	1.9015	5.92438	7.94689	WBGene00007216	C01A2.4
X0477	chrI	13428029	13428517	489	*	489	13426450	13428473	-	overlapStart	444	44	NearestLocation	1.75033	3.89636	5.76931	WBGene00012739	Y40B1B.7
X0478	chrI	13435432	13435768	337	*	337	13435487	13437965	+	overlapStart	-55	55	NearestLocation	1.4892	10.8927	13.3326	WBGene00012738	eif-3.J
X0479	chrI	13438806	13439088	283	*	283	13438492	13438592	+	downstream	314	214	NearestLocation	1.47785	10.1376	12.5189	WBGene00220148	Y40B1B.10
X0480	chrI	13475230	13476253	1024	*	1024	13471575	13474185	-	upstream	-1045	1045	NearestLocation	1.66641	3.14309	4.93434	WBGene00013020	Y48G10A.3
X0481	chrI	13547181	13547518	338	*	338	13543094	13545188	-	upstream	-1993	1993	NearestLocation	1.55286	11.6082	14.1027	WBGene00000089	aex-6
X0482	chrI	13559086	13559384	299	*	299	13548074	13559361	-	overlapStart	275	23	NearestLocation	1.61923	15.3208	18.1107	WBGene00006936	vars-2
X0483	chrI	13559859	13560684	826	*	826	13560528	13563465	+	overlapStart	-669	156	NearestLocation	1.68778	4.60806	6.52573	WBGene00013602	Y87G2A.16
X0484	chrI	13576170	13576715	546	*	546	13576248	13581592	+	overlapStart	-78	78	NearestLocation	1.3345	1.86989	3.52012	WBGene00013597	gpi-1
X0485	chrI	13588854	13589144	291	*	291	13586182	13588831	-	upstream	-23	23	NearestLocation	1.48097	1.31018	2.88383	WBGene00013598	vps-28
X0486	chrI	13589472	13589767	296	*	296	13586182	13588831	-	upstream	-641	641	NearestLocation	1.8854	5.14736	7.14115	WBGene00013598	vps-28
X0487	chrI	13626021	13626775	755	*	755	13603900	13626225	-	overlapStart	204	204	NearestLocation	1.55047	3.9402	5.79495	WBGene00012386	agef-1
X0488	chrI	13654911	13655252	342	*	342	13654029	13658165	+	inside	882	882	NearestLocation	1.29749	4.99101	6.95897	WBGene00012353	W09C5.7
X0489	chrI	13666824	13667106	283	*	283	13663485	13674964	+	inside	3339	3339	NearestLocation	1.48225	9.68436	12.0245	WBGene00012234	W04A4.5
X0490	chrI	13814929	13815520	592	*	592	13812135	13814355	-	upstream	-574	574	NearestLocation	1.26457	4.44366	6.36377	WBGene00012371	W09G3.8
X0491	chrI	13856615	13857204	590	*	590	13854640	13859551	+	inside	1975	1975	NearestLocation	1.4037	4.56322	6.48691	WBGene00012241	W04A8.6
X0492	chrI	13952994	13953439	446	*	446	13952159	13953194	+	overlapEnd	835	200	NearestLocation	1.22653	2.57155	4.30486	WBGene00004475	rps-6
X0493	chrI	14050341	14050621	281	*	281	14048085	14051003	-	inside	662	382	NearestLocation	1.3499	5.55187	7.56341	WBGene00004875	smd-1
X0494	chrI	14071332	14071705	374	*	374	14070556	14070619	-	upstream	-713	713	NearestLocation	1.24552	3.12989	4.91146	WBGene00198066	F47G4.13
X0495	chrI	14073695	14074259	565	*	565	14075067	14075163	+	upstream	-1372	808	NearestLocation	1.38776	6.55519	8.65654	WBGene00197035	F47G4.11
X0496	chrI	14101985	14102461	477	*	477	14101277	14104475	+	inside	708	708	NearestLocation	1.21693	2.54212	4.27149	WBGene00006565	tfg-1
X0497	chrI	14103753	14104235	483	*	483	14101277	14104475	+	inside	2476	240	NearestLocation	1.32942	6.64516	8.7577	WBGene00006565	tfg-1
X0498	chrI	14357894	14359235	1342	*	1342	14347514	14358326	-	overlapStart	432	432	NearestLocation	1.75412	4.59891	6.53759	WBGene00013667	Y105E8A.2
X0499	chrI	14370137	14370924	788	*	788	14367579	14369773	-	upstream	-364	364	NearestLocation	1.62797	4.67659	6.60339	WBGene00001156	ech-7
X0500	chrI	14419821	14420128	308	*	308	14418197	14431811	+	inside	1624	1624	NearestLocation	1.93084	9.58677	11.9253	WBGene00013670	hpo-13
X0501	chrI	14468460	14468840	381	*	381	14468382	14468491	-	overlapStart	31	31	NearestLocation	1.18731	2.34033	4.04772	WBGene00014612	mir-354
X0502	chrI	14604113	14604823	711	*	711	14567332	14616523	-	inside	12410	11700	NearestLocation	1.55336	2.06814	3.73914	WBGene00013682	Y105E8A.25
X0503	chrI	14768776	14769082	307	*	307	14760648	14768980	-	overlapStart	204	102	NearestLocation	1.38175	6.92502	9.05966	WBGene00009558	F39B2.8
X0504	chrI	14902313	14902744	432	*	432	14875784	14900330	-	upstream	-1983	1983	NearestLocation	1.4814	1.30603	2.88	WBGene00001488	frm-1
X0505	chrI	14921800	14922242	443	*	443	14924360	14924453	-	downstream	2653	2118	NearestLocation	1.34718	5.49221	7.50696	WBGene00219910	F21F12.2
X0506	chrI	14930081	14930580	500	*	500	14929757	14930015	-	upstream	-66	66	NearestLocation	1.58724	2.13522	3.82139	WBGene00219911	F21F12.3
X0507	chrI	14931050	14932475	1426	*	1426	14929757	14930015	-	upstream	-1035	1035	NearestLocation	1.70181	3.28568	5.09623	WBGene00219911	F21F12.3
X0508	chrI	14934639	14935174	536	*	536	14929757	14930015	-	upstream	-4624	4624	NearestLocation	1.53095	1.67117	3.29814	WBGene00219911	F21F12.3
X0509	chrI	14936686	14937039	354	*	354	14929757	14930015	-	upstream	-6671	6671	NearestLocation	1.4188	6.4629	8.56402	WBGene00219911	F21F12.3
X0510	chrI	14940053	14940374	322	*	322	14949930	14949980	-	downstream	9927	9556	NearestLocation	1.5686	10.7061	13.1324	WBGene00196768	ZK909.7
X0511	chrI	14945547	14945882	336	*	336	14949930	14949980	-	downstream	4433	4048	NearestLocation	1.30636	3.59782	5.42116	WBGene00196768	ZK909.7
X0512	chrI	14946506	14946793	288	*	288	14949930	14949980	-	downstream	3474	3137	NearestLocation	1.44643	5.10213	7.08988	WBGene00196768	ZK909.7
X0513	chrII	18912	19279	368	*	368	18637	18697	-	upstream	-215	215	NearestLocation	1.25026	3.41358	5.23306	WBGene00255561	mir-8186.2
X0514	chrII	27971	29661	1691	*	1691	25407	28418	-	overlapStart	447	447	NearestLocation	1.73942	4.05381	5.92852	WBGene00017745	F23F1.4
X0515	chrII	30920	32119	1200	*	1200	31768	33610	+	overlapStart	-848	351	NearestLocation	1.60417	2.4096	4.12549	WBGene00017744	fbxc-54
X0516	chrII	40902	42087	1186	*	1186	41470	41984	-	includeFeature	1082	103	NearestLocation	1.79284	4.21349	6.11204	WBGene00017750	F23F1.10
X0517	chrII	69007	69539	533	*	533	69660	71279	+	upstream	-653	121	NearestLocation	1.79979	4.24502	6.14922	WBGene00001193	egl-26
X0518	chrII	92075	92902	828	*	828	88221	91519	-	upstream	-556	556	NearestLocation	2.08412	7.76664	9.96852	WBGene00016812	C50D2.9
X0519	chrII	97602	98013	412	*	412	96127	98027	-	inside	425	14	NearestLocation	1.46755	2.33209	4.03235	WBGene00016811	C50D2.8
X0520	chrII	121552	121954	403	*	403	114429	121219	-	upstream	-333	333	NearestLocation	1.62991	2.57695	4.30635	WBGene00019615	K10B4.3
X0521	chrII	163110	163406	297	*	297	162374	170628	+	inside	736	736	NearestLocation	1.62974	13.1572	15.7761	WBGene00001340	etr-1
X0522	chrII	285841	286305	465	*	465	283887	286275	-	overlapStart	434	30	NearestLocation	1.57293	3.3705	5.19428	WBGene00015191	B0432.10
X0523	chrII	286522	287059	538	*	538	286625	288850	+	overlapStart	-103	103	NearestLocation	1.58958	3.06508	4.85106	WBGene00015186	misc-1
X0524	chrII	306194	306489	296	*	296	303924	305530	-	upstream	-664	664	NearestLocation	1.60692	14.5296	17.2539	WBGene00000645	col-69
X0525	chrII	387235	388714	1480	*	1480	388833	392737	+	upstream	-1598	119	NearestLocation	1.72681	3.70467	5.55568	WBGene00015404	nstp-4
X0526	chrII	401813	402159	347	*	347	402660	404235	+	upstream	-847	501	NearestLocation	2.04849	19.4213	22.526	WBGene00015403	clec-10
X0527	chrII	481541	481845	305	*	305	480465	484386	-	inside	2845	1076	NearestLocation	1.78244	4.37776	6.29995	WBGene00021074	W07E6.2
X0528	chrII	496309	496658	350	*	350	494577	498659	+	inside	1732	1732	NearestLocation	2.22221	10.2615	12.6542	WBGene00021075	W07E6.3
X0529	chrII	602951	603592	642	*	642	595204	602120	-	upstream	-831	831	NearestLocation	1.62066	2.71063	4.45681	WBGene00003599	nhl-3
X0530	chrII	620756	621072	317	*	317	614767	624543	-	inside	3787	3471	NearestLocation	1.73808	17.9676	20.9625	WBGene00020207	T04B8.5
X0531	chrII	700864	701216	353	*	353	700474	701137	-	overlapStart	273	79	NearestLocation	1.465	12.2134	14.7521	WBGene00020181	T02H6.11
X0532	chrII	711178	711503	326	*	326	709381	723706	+	inside	1797	1797	NearestLocation	1.57869	2.5632	4.29926	WBGene00020171	T02H6.1
X0533	chrII	716661	716961	301	*	301	723788	732421	+	upstream	-7127	6827	NearestLocation	1.45788	8.51155	10.7623	WBGene00021456	Y39F10B.1
X0534	chrII	727263	727539	277	*	277	723788	732421	+	inside	3475	3475	NearestLocation	1.8828	14.0715	16.7606	WBGene00021456	Y39F10B.1
X0535	chrII	1234115	1234794	680	*	680	1235860	1235967	+	upstream	-1745	1066	NearestLocation	1.57341	10.5422	12.9545	WBGene00202164	F47F6.14
X0536	chrII	1237871	1238328	458	*	458	1235860	1235967	+	downstream	2011	1904	NearestLocation	1.28337	3.62233	5.46466	WBGene00202164	F47F6.14
X0537	chrII	1241176	1241562	387	*	387	1242097	1242171	+	upstream	-921	535	NearestLocation	1.42734	7.45685	9.63013	WBGene00199388	F47F6.11
X0538	chrII	1244453	1244733	281	*	281	1233244	1244035	-	upstream	-418	418	NearestLocation	1.56038	11.9459	14.4708	WBGene00018572	lin-42
X0539	chrII	1318319	1318593	275	*	275	1319221	1319273	-	downstream	954	628	NearestLocation	1.52183	11.261	13.7342	WBGene00195498	F56D12.8
X0540	chrII	1401851	1402176	326	*	326	1401810	1402105	+	overlapEnd	41	41	NearestLocation	1.6329	4.17945	6.06558	WBGene00021786	Y51H7C.8
X0541	chrII	2195434	2196154	721	*	721	2192364	2194114	-	upstream	-1320	1320	NearestLocation	1.59144	2.68234	4.42591	WBGene00016342	C33C12.10
X0542	chrII	2648809	2649260	452	*	452	2647694	2649639	-	inside	830	379	NearestLocation	1.4813	1.30714	2.881	WBGene00017711	F22E5.13
X0543	chrII	2707695	2708008	314	*	314	2705921	2707982	-	overlapStart	287	26	NearestLocation	2.10054	14.5085	17.2301	WBGene00021654	Y47G7B.2
X0544	chrII	2803231	2803519	289	*	289	2794938	2800600	-	upstream	-2631	2631	NearestLocation	1.72241	13.7553	16.4186	WBGene00003709	nhr-119
X0545	chrII	2920244	2920629	386	*	386	2919715	2920846	+	inside	529	217	NearestLocation	1.20245	3.03026	4.80922	WBGene00022452	Y110A2AR.1
X0546	chrII	2921851	2922220	370	*	370	2923917	2926951	+	upstream	-2066	1697	NearestLocation	1.89395	25.1321	28.7258	WBGene00022712	ZK355.2
X0547	chrII	2922845	2923125	281	*	281	2923917	2926951	+	upstream	-1072	792	NearestLocation	1.73521	18.0588	21.0618	WBGene00022712	ZK355.2
X0548	chrII	2971375	2972390	1016	*	1016	2969192	2969248	-	upstream	-2127	2127	NearestLocation	1.97546	8.54118	10.778	WBGene00197932	K08A2.13
X0549	chrII	2974095	2974442	348	*	348	2976639	2986981	+	upstream	-2544	2197	NearestLocation	1.58243	12.6645	15.2462	WBGene00003678	nhr-88
X0550	chrII	2975041	2975755	715	*	715	2976639	2986981	+	upstream	-1598	884	NearestLocation	1.67399	4.06437	5.95309	WBGene00003678	nhr-88
X0551	chrII	2976515	2976834	320	*	320	2976639	2986981	+	overlapStart	-124	124	NearestLocation	1.83287	16.1162	18.9621	WBGene00003678	nhr-88
X0552	chrII	3014784	3015088	305	*	305	3014835	3015961	+	overlapStart	-51	51	NearestLocation	1.94623	22.0056	25.3391	WBGene00016572	C41H7.2
X0553	chrII	3128564	3129114	551	*	551	3129179	3131376	+	upstream	-615	65	NearestLocation	1.86688	6.61235	8.71049	WBGene00020407	chil-24
X0554	chrII	3209204	3210062	859	*	859	3209478	3211376	+	overlapStart	-274	274	NearestLocation	1.58572	2.16184	3.84795	WBGene00022569	ZC239.6
X0555	chrII	3816279	3816741	463	*	463	3816961	3818238	+	upstream	-682	220	NearestLocation	1.49337	4.37389	6.27984	WBGene00018803	fbxa-24
X0556	chrII	3898107	3898394	288	*	288	3898142	3899709	+	overlapStart	-35	35	NearestLocation	1.49	11.5738	14.0696	WBGene00018750	F53C3.6
X0557	chrII	3927806	3928090	285	*	285	3919794	3927982	-	overlapStart	176	108	NearestLocation	1.57444	12.1107	14.6478	WBGene00018756	F53C3.13
X0558	chrII	3951807	3952203	397	*	397	3950377	3972138	+	inside	1430	1430	NearestLocation	1.6286	2.72574	4.48015	WBGene00004751	sea-2
X0559	chrII	3952465	3952994	530	*	530	3950377	3972138	+	inside	2088	2088	NearestLocation	1.71597	4.16637	6.05675	WBGene00004751	sea-2
X0560	chrII	4049727	4050013	287	*	287	4048525	4049129	-	upstream	-598	598	NearestLocation	1.75859	19.3588	22.4652	WBGene00023318	K07D4.1
X0561	chrII	4183844	4184170	327	*	327	4186666	4208499	+	upstream	-2822	2496	NearestLocation	1.70782	3.52609	5.34856	WBGene00006495	cpna-1
X0562	chrII	4333320	4333737	418	*	418	4335707	4338424	+	upstream	-2387	1970	NearestLocation	2.17714	9.11399	11.4198	WBGene00019218	madf-3
X0563	chrII	4372894	4373220	327	*	327	4369625	4372568	-	upstream	-326	326	NearestLocation	1.44862	9.92178	12.2822	WBGene00015116	B0286.3
X0564	chrII	4433466	4433806	341	*	341	4433403	4435365	+	inside	63	63	NearestLocation	1.57344	2.02969	3.70117	WBGene00003699	nhr-109
X0565	chrII	4495249	4495527	279	*	279	4492452	4492566	-	upstream	-2683	2683	NearestLocation	1.69815	8.23169	10.4643	WBGene00196553	T05C1.7
X0566	chrII	4507971	4508255	285	*	285	4491147	4505147	-	upstream	-2824	2824	NearestLocation	1.57793	2.04493	3.72167	WBGene00020251	camt-1
X0567	chrII	4693535	4693873	339	*	339	4693445	4696408	+	inside	90	90	NearestLocation	1.58079	3.29416	5.10235	WBGene00017369	F10G7.5
X0568	chrII	4728188	4729294	1107	*	1107	4727318	4727871	-	upstream	-317	317	NearestLocation	1.70817	3.301	5.11153	WBGene00017374	ttr-41
X0569	chrII	4741851	4742247	397	*	397	4742128	4745281	+	overlapStart	-277	119	NearestLocation	1.45366	1.22628	2.78459	WBGene00018269	acs-11
X0570	chrII	4852042	4852936	895	*	895	4852056	4857710	+	overlapStart	-14	14	NearestLocation	1.71054	4.58252	6.50665	WBGene00001027	dnj-9
X0571	chrII	4855184	4857076	1893	*	1893	4857923	4859181	+	upstream	-2739	847	NearestLocation	1.61815	4.10204	5.97645	WBGene00017385	F11G11.5
X0572	chrII	4857993	4858317	325	*	325	4857923	4859181	+	inside	70	70	NearestLocation	1.47267	8.8851	11.1714	WBGene00017385	F11G11.5
X0573	chrII	4872287	4872788	502	*	502	4872098	4873127	-	inside	840	189	NearestLocation	1.29104	3.33648	5.14081	WBGene00000649	col-73
X0574	chrII	4888512	4889194	683	*	683	4889437	4891469	+	upstream	-925	243	NearestLocation	1.63314	3.24427	5.04623	WBGene00019890	R05F9.6
X0575	chrII	4993769	4994418	650	*	650	4994033	4995607	+	overlapStart	-264	264	NearestLocation	1.42068	2.28531	3.98469	WBGene00020866	vps-24
X0576	chrII	4994663	4995571	909	*	909	4995551	4998033	+	overlapStart	-888	20	NearestLocation	1.56069	2.30863	4.01231	WBGene00004382	rnh-1.0
X0577	chrII	5091725	5092945	1221	*	1221	5083848	5091636	-	upstream	-89	89	NearestLocation	1.58311	2.7398	4.48815	WBGene00004040	pld-1
X0578	chrII	5201059	5201634	576	*	576	5199763	5200222	+	downstream	1296	837	NearestLocation	1.57522	2.30803	4.00697	WBGene00003443	msp-50
X0579	chrII	5276684	5277023	340	*	340	5273558	5273647	-	upstream	-3037	3037	NearestLocation	1.57607	2.13855	3.81955	WBGene00200325	C54A12.8
X0580	chrII	5320245	5320645	401	*	401	5323007	5340818	+	upstream	-2762	2362	NearestLocation	1.62977	2.513	4.24342	WBGene00006923	vhp-1
X0581	chrII	5323021	5323344	324	*	324	5323007	5340818	+	inside	14	14	NearestLocation	1.71528	3.35286	5.17088	WBGene00006923	vhp-1
X0582	chrII	5326053	5326707	655	*	655	5323007	5340818	+	inside	3046	3046	NearestLocation	1.80333	4.29316	6.20606	WBGene00006923	vhp-1
X0583	chrII	5329246	5330047	802	*	802	5329561	5331221	-	overlapEnd	1975	315	NearestLocation	1.61088	2.46717	4.19013	WBGene00219672	anr-54
X0584	chrII	5330866	5331271	406	*	406	5329561	5331221	-	overlapStart	355	50	NearestLocation	1.86246	5.1037	7.08647	WBGene00219672	anr-54
X0585	chrII	5331488	5331888	401	*	401	5329561	5331221	-	upstream	-267	267	NearestLocation	1.54877	1.83032	3.47579	WBGene00219672	anr-54
X0586	chrII	5334869	5335812	944	*	944	5335930	5335986	+	upstream	-1061	118	NearestLocation	1.60986	2.41034	4.12382	WBGene00219881	F08B1.8
X0587	chrII	5336097	5336391	295	*	295	5335930	5335986	+	downstream	167	111	NearestLocation	1.56328	3.57535	5.41816	WBGene00219881	F08B1.8
X0588	chrII	5337647	5338807	1161	*	1161	5335930	5335986	+	downstream	1717	1661	NearestLocation	1.78151	4.42062	6.3246	WBGene00219881	F08B1.8
X0589	chrII	5377311	5377729	419	*	419	5378063	5379636	+	upstream	-752	334	NearestLocation	1.38046	1.63643	3.25459	WBGene00006434	prdx-2
X0590	chrII	5377952	5378304	353	*	353	5378063	5379636	+	overlapStart	-111	111	NearestLocation	1.37676	2.16516	3.85127	WBGene00006434	prdx-2
X0591	chrII	5404244	5404526	283	*	283	5405819	5407634	-	downstream	3390	1293	NearestLocation	1.67272	2.90851	4.68329	WBGene00017139	clec-141
X0592	chrII	5429432	5430269	838	*	838	5425780	5429572	-	overlapStart	140	140	NearestLocation	1.39441	1.7258	3.35503	WBGene00017217	F07F6.4
X0593	chrII	5572402	5573488	1087	*	1087	5571302	5571965	+	downstream	1100	437	NearestLocation	1.7254	3.75772	5.59423	WBGene00015896	C17C3.15
X0594	chrII	5627972	5628486	515	*	515	5626314	5627263	-	upstream	-709	709	NearestLocation	1.55975	1.92731	3.58412	WBGene00235269	F59E12.15
X0595	chrII	5820378	5820940	563	*	563	5820712	5824085	+	overlapStart	-334	228	NearestLocation	1.58897	2.76461	4.52254	WBGene00001224	ehs-1
X0596	chrII	5823271	5823545	275	*	275	5820712	5824085	+	inside	2559	540	NearestLocation	1.62954	9.86379	12.2264	WBGene00001224	ehs-1
X0597	chrII	5828063	5828586	524	*	524	5827587	5828586	-	inside	523	0	NearestLocation	1.4391	1.18188	2.73386	WBGene00022881	ZK1248.11
X0598	chrII	5836608	5837018	411	*	411	5833328	5836203	-	upstream	-405	405	NearestLocation	1.78403	4.09167	5.99076	WBGene00001509	fzo-1
X0599	chrII	5871524	5872441	918	*	918	5867254	5873614	-	inside	2090	1173	NearestLocation	1.66128	2.87134	4.63994	WBGene00018872	F55C12.5
X0600	chrII	5882087	5882369	283	*	283	5880138	5880284	-	upstream	-1803	1803	NearestLocation	1.62969	8.91195	11.2013	WBGene00198639	F55C12.13
X0601	chrII	5886369	5886667	299	*	299	5885087	5885293	-	upstream	-1076	1076	NearestLocation	1.60758	2.30985	4.01722	WBGene00196578	F55C12.10
X0602	chrII	5899632	5900217	586	*	586	5900229	5900328	+	upstream	-597	12	NearestLocation	1.55401	1.87221	3.52326	WBGene00199631	F59G1.13
X0603	chrII	5900658	5900996	339	*	339	5900229	5900328	+	downstream	429	330	NearestLocation	1.47566	2.64257	4.3824	WBGene00199631	F59G1.13
X0604	chrII	5901705	5902033	329	*	329	5901804	5902066	-	overlapEnd	361	33	NearestLocation	1.51347	10.9904	13.4335	WBGene00198855	F59G1.12
X0605	chrII	5906898	5907569	672	*	672	5907816	5911222	+	upstream	-918	247	NearestLocation	1.41618	1.30181	2.87181	WBGene00006933	vps-35
X0606	chrII	5912517	5913139	623	*	623	5912551	5912571	+	includeFeature	-34	34	NearestLocation	1.77822	4.48563	6.40536	WBGene00168297	21ur-12205
X0607	chrII	5914964	5915320	357	*	357	5917422	5918319	+	upstream	-2458	2102	NearestLocation	1.80705	19.4167	22.5487	WBGene00001486	frh-1
X0608	chrII	5917921	5918237	317	*	317	5918626	5921617	+	upstream	-705	389	NearestLocation	1.66779	3.47024	5.30258	WBGene00004214	ptp-2
X0609	chrII	5930471	5930872	402	*	402	5933493	5940801	+	upstream	-3022	2621	NearestLocation	1.62839	2.49634	4.22552	WBGene00001208	egl-44
X0610	chrII	6047821	6048226	406	*	406	6046287	6047867	-	overlapStart	46	46	NearestLocation	1.53494	2.44355	4.1637	WBGene00020026	R12C12.6
X0611	chrII	6048516	6048829	314	*	314	6048109	6049694	+	inside	407	407	NearestLocation	1.4916	1.76966	3.40435	WBGene00004306	ran-5
X0612	chrII	6049155	6049562	408	*	408	6050375	6054306	+	upstream	-1220	813	NearestLocation	1.65625	2.77117	4.52865	WBGene00020022	R12C12.1
X0613	chrII	6049882	6050161	280	*	280	6050375	6054306	+	upstream	-493	214	NearestLocation	1.68052	2.96966	4.75272	WBGene00020022	R12C12.1
X0614	chrII	6123208	6123979	772	*	772	6123809	6125424	+	overlapStart	-601	170	NearestLocation	1.58319	2.9183	4.68308	WBGene00016235	C29H12.2
X0615	chrII	6236093	6236545	453	*	453	6234133	6234255	+	downstream	1960	1838	NearestLocation	1.59352	2.60663	4.34494	WBGene00199512	T24H7.7
X0616	chrII	6244625	6245042	418	*	418	6245131	6246257	+	upstream	-506	89	NearestLocation	1.53779	1.72899	3.36302	WBGene00020783	blos-4
X0617	chrII	6251357	6251669	313	*	313	6251411	6253006	+	overlapStart	-54	54	NearestLocation	1.65703	18.7323	21.7971	WBGene00004015	phb-2
X0618	chrII	6273953	6274562	610	*	610	6274021	6274145	+	includeFeature	-68	68	NearestLocation	1.54983	1.84875	3.49752	WBGene00199174	F13H8.14
X0619	chrII	6276598	6277386	789	*	789	6274265	6279692	+	inside	2333	2306	NearestLocation	1.56385	2.20185	3.89299	WBGene00000259	bpl-1
X0620	chrII	6343468	6343751	284	*	284	6343088	6343234	+	downstream	380	234	NearestLocation	1.67505	12.5588	15.1342	WBGene00200080	C32D5.18
X0621	chrII	6491795	6492122	328	*	328	6491936	6492164	+	overlapStart	-141	42	NearestLocation	1.16925	1.78532	3.42325	WBGene00195728	T28D9.13
X0622	chrII	6613527	6613815	289	*	289	6613599	6613780	-	includeFeature	253	35	NearestLocation	1.59687	13.6692	16.3304	WBGene00195848	F54H5.7
X0623	chrII	6685972	6686269	298	*	298	6685533	6685681	+	downstream	439	291	NearestLocation	1.29068	4.13206	6.01335	WBGene00197105	C18H9.9
X0624	chrII	6891215	6891520	306	*	306	6888552	6890418	-	upstream	-797	797	NearestLocation	1.36936	7.04751	9.18343	WBGene00016630	acer-1
X0625	chrII	6892148	6892829	682	*	682	6891714	6893635	-	inside	1487	434	NearestLocation	1.71997	5.57488	7.60744	WBGene00016632	C44B7.12
X0626	chrII	6893133	6894171	1039	*	1039	6893972	6893992	-	includeFeature	859	179	NearestLocation	1.60652	3.82484	5.67563	WBGene00166760	21ur-13828
X0627	chrII	6950774	6951177	404	*	404	6947874	6951300	-	inside	526	123	NearestLocation	1.4187	1.50644	3.10729	WBGene00017702	F22D3.6
X0628	chrII	6972796	6973132	337	*	337	6972687	6972790	+	downstream	109	6	NearestLocation	1.49462	10.0198	12.3881	WBGene00196089	C15F1.13
X0629	chrII	7025871	7026240	370	*	370	7025802	7030162	+	inside	69	69	NearestLocation	1.5167	2.4408	4.16018	WBGene00016888	C52E12.1
X0630	chrII	7101991	7102328	338	*	338	7099584	7101163	-	upstream	-828	828	NearestLocation	1.41702	1.43706	3.02629	WBGene00020169	mmaa-1
X0631	chrII	7122756	7123140	385	*	385	7122260	7122279	-	upstream	-477	477	NearestLocation	1.2468	3.65935	5.5109	WBGene00195030	F10E7.12
X0632	chrII	7132206	7133078	873	*	873	7132643	7137217	+	overlapStart	-437	435	NearestLocation	1.49523	2.63347	4.37157	WBGene00001597	gld-3
X0633	chrII	7154772	7155231	460	*	460	7155631	7160938	+	upstream	-859	400	NearestLocation	1.19722	2.03659	3.7065	WBGene00016172	C27H5.2
X0634	chrII	7328469	7328768	300	*	300	7328736	7331324	-	overlapEnd	2855	32	NearestLocation	1.80715	9.40875	11.7268	WBGene00017664	npax-1
X0635	chrII	7363419	7364183	765	*	765	7363216	7364107	-	overlapStart	688	76	NearestLocation	1.75218	3.77568	5.63122	WBGene00018393	msra-1
X0636	chrII	7368324	7368737	414	*	414	7366591	7368846	-	inside	522	109	NearestLocation	1.29192	2.32545	4.02682	WBGene00018394	F43E2.6
X0637	chrII	7392171	7392487	317	*	317	7394765	7397351	+	upstream	-2594	2278	NearestLocation	1.34637	1.36234	2.94178	WBGene00015567	bath-44
X0638	chrII	7528839	7529116	278	*	278	7529396	7529542	+	upstream	-557	280	NearestLocation	1.66707	2.90208	4.67417	WBGene00201513	ZK1290.22
X0639	chrII	7635382	7635717	336	*	336	7635456	7635601	+	includeFeature	-74	74	NearestLocation	1.33299	5.2088	7.18292	WBGene00200555	R153.5
X0640	chrII	7641614	7641996	383	*	383	7635456	7635601	+	downstream	6158	6013	NearestLocation	1.37895	6.97021	9.10711	WBGene00200555	R153.5
X0641	chrII	7642929	7643216	288	*	288	7635456	7635601	+	downstream	7473	7328	NearestLocation	1.6559	14.546	17.2732	WBGene00200555	R153.5
X0642	chrII	7757311	7759040	1730	*	1730	7757190	7758439	-	overlapStart	1128	121	NearestLocation	1.67984	3.37329	5.18785	WBGene00015064	B0228.7
X0643	chrII	7851880	7852380	501	*	501	7852627	7852773	+	upstream	-747	247	NearestLocation	1.80828	4.61035	6.53827	WBGene00199782	T09A5.20
X0644	chrII	7863759	7864077	319	*	319	7864074	7866259	+	overlapStart	-315	3	NearestLocation	1.24344	3.82697	5.68053	WBGene00011638	ostb-1
X0645	chrII	7878429	7878728	300	*	300	7874232	7877994	-	upstream	-435	435	NearestLocation	1.92245	12.7001	15.2856	WBGene00011348	T01H3.2
X0646	chrII	7887274	7887806	533	*	533	7887845	7887968	-	downstream	694	39	NearestLocation	1.54482	1.84376	3.48826	WBGene00195656	T01H3.6
X0647	chrII	7891991	7892266	276	*	276	7892058	7892192	-	includeFeature	201	67	NearestLocation	1.5404	2.90308	4.66881	WBGene00196994	T01H3.7
X0648	chrII	7944761	7945372	612	*	612	7942602	7945206	-	overlapStart	445	166	NearestLocation	1.6679	3.01316	4.78592	WBGene00014054	ZK669.4
X0649	chrII	8012588	8013056	469	*	469	8012816	8015254	+	overlapStart	-228	228	NearestLocation	1.71551	3.42048	5.24074	WBGene00008436	DH11.2
X0650	chrII	8014179	8014474	296	*	296	8012816	8015254	+	inside	1363	780	NearestLocation	1.83931	4.75961	6.71816	WBGene00008436	DH11.2
X0651	chrII	8014786	8015574	789	*	789	8012816	8015254	+	overlapEnd	1970	320	NearestLocation	1.69335	3.90536	5.75637	WBGene00008436	DH11.2
X0652	chrII	8017375	8017819	445	*	445	8017571	8017701	-	includeFeature	326	118	NearestLocation	1.44361	2.06006	3.73267	WBGene00200795	C08B11.12
X0653	chrII	8028270	8028613	344	*	344	8028060	8028245	-	upstream	-25	25	NearestLocation	1.17439	2.02826	3.69925	WBGene00201642	C08B11.13
X0654	chrII	8034440	8034987	548	*	548	8034345	8035767	-	inside	1327	95	NearestLocation	1.38599	7.28509	9.45568	WBGene00004723	sap-49
X0655	chrII	8131382	8131698	317	*	317	8130695	8130981	+	downstream	687	401	NearestLocation	1.47202	10.6746	13.0926	WBGene00219852	C41C4.16
X0656	chrII	8138133	8138751	619	*	619	8137880	8141276	+	inside	253	253	NearestLocation	1.50827	3.53793	5.3727	WBGene00008053	cdc-48.2
X0657	chrII	8216938	8217234	297	*	297	8217231	8222201	+	overlapStart	-293	3	NearestLocation	1.38781	1.95535	3.61679	WBGene00002066	ifg-1
X0658	chrII	8217841	8218143	303	*	303	8217231	8222201	+	inside	610	610	NearestLocation	1.31956	5.60639	7.63999	WBGene00002066	ifg-1
X0659	chrII	8226747	8227101	355	*	355	8226132	8229150	+	inside	615	615	NearestLocation	1.46904	1.65457	3.27532	WBGene00000894	dab-1
X0660	chrII	8283569	8283849	281	*	281	8283667	8285711	+	overlapStart	-98	98	NearestLocation	1.47699	12.8431	15.4387	WBGene00000379	cct-4
X0661	chrII	8428476	8429491	1016	*	1016	8423951	8429063	-	overlapStart	587	428	NearestLocation	1.54236	2.90218	4.67391	WBGene00008800	F14E5.2
X0662	chrII	8479933	8480353	421	*	421	8477952	8480478	-	inside	545	125	NearestLocation	1.60742	2.33047	4.03978	WBGene00010877	lact-4
X0663	chrII	8641004	8641448	445	*	445	8641381	8648202	+	overlapStart	-377	67	NearestLocation	1.72431	3.464	5.29683	WBGene00008432	D2085.7
X0664	chrII	8678270	8678561	292	*	292	8669133	8679891	-	inside	1621	1330	NearestLocation	1.70228	16.2143	19.0735	WBGene00008430	hgap-2
X0665	chrII	8717163	8718803	1641	*	1641	8716845	8721691	+	inside	318	318	NearestLocation	1.61203	2.51097	4.23858	WBGene00011311	T01B7.5
X0666	chrII	8743004	8743297	294	*	294	8743725	8747234	+	upstream	-721	428	NearestLocation	1.56334	11.2211	13.6921	WBGene00010681	mak-1
X0667	chrII	8784642	8784957	316	*	316	8784535	8785513	+	inside	107	107	NearestLocation	1.55184	13.8987	16.5721	WBGene00014307	F07H5.3
X0668	chrII	8786718	8787300	583	*	583	8786457	8787119	+	overlapEnd	261	181	NearestLocation	1.51968	3.06688	4.85422	WBGene00014308	F07H5.4
X0669	chrII	8810667	8810951	285	*	285	8808634	8810729	-	overlapStart	62	62	NearestLocation	1.52841	2.2463	3.94195	WBGene00009784	F46C5.9
X0670	chrII	8813082	8813395	314	*	314	8811353	8812632	+	downstream	1729	450	NearestLocation	1.53445	1.7345	3.3688	WBGene00009783	rer-1
X0671	chrII	8883829	8884281	453	*	453	8883764	8884350	-	inside	521	65	NearestLocation	1.40145	1.36122	2.94069	WBGene00045407	T07D4.5
X0672	chrII	8884608	8885032	425	*	425	8884901	8889683	+	overlapStart	-293	131	NearestLocation	1.4032	2.09728	3.77654	WBGene00011580	ddx-19
X0673	chrII	8891542	8891899	358	*	358	8891541	8891876	-	overlapStart	334	1	NearestLocation	1.50567	2.12124	3.80307	WBGene00202113	B0457.18
X0674	chrII	8932294	8932797	504	*	504	8930985	8933799	+	inside	1309	1002	NearestLocation	1.45941	9.84966	12.2185	WBGene00011884	enol-1
X0675	chrII	8963279	8963553	275	*	275	8955237	8964149	-	inside	870	596	NearestLocation	1.66451	2.99586	4.77448	WBGene00007690	sftd-3
X0676	chrII	8972908	8973676	769	*	769	8971958	8973566	-	overlapStart	658	110	NearestLocation	1.74559	6.53283	8.59905	WBGene00007686	tomm-40
X0677	chrII	8993186	8993729	544	*	544	8993169	8994535	+	inside	17	17	NearestLocation	1.65254	3.09015	4.878	WBGene00003870	ooc-5
X0678	chrII	9007749	9008095	347	*	347	9002527	9005167	-	upstream	-2582	2582	NearestLocation	1.36557	6.1955	8.26182	WBGene00009716	F44G4.7
X0679	chrII	9037867	9038243	377	*	377	9035561	9038301	-	inside	434	58	NearestLocation	1.65459	2.78891	4.54416	WBGene00001527	gcs-1
X0680	chrII	9038721	9039681	961	*	961	9038863	9039150	+	includeFeature	-142	142	NearestLocation	1.65213	2.72635	4.47978	WBGene00200154	F37B12.11
X0681	chrII	9076510	9076834	325	*	325	9077516	9077647	-	downstream	1137	682	NearestLocation	1.61415	15.7681	18.5871	WBGene00200126	T24B8.19
X0682	chrII	9094168	9094493	326	*	326	9091109	9093696	-	upstream	-472	472	NearestLocation	1.69729	3.14046	4.9406	WBGene00007421	C07H4.1
X0683	chrII	9113063	9113344	282	*	282	9113219	9132213	+	overlapStart	-156	125	NearestLocation	1.55347	6.48959	8.59727	WBGene00012005	jun-1
X0684	chrII	9116212	9116502	291	*	291	9113219	9132213	+	inside	2993	2993	NearestLocation	1.63209	7.02758	9.17638	WBGene00012005	jun-1
X0685	chrII	9117751	9118560	810	*	810	9113219	9132213	+	inside	4532	4532	NearestLocation	1.83109	4.85918	6.79783	WBGene00012005	jun-1
X0686	chrII	9125447	9125746	300	*	300	9124971	9125239	-	upstream	-208	208	NearestLocation	1.49038	1.37104	2.95461	WBGene00220092	T24H10.12
X0687	chrII	9127119	9127457	339	*	339	9124971	9125239	-	upstream	-1880	1880	NearestLocation	1.63304	2.56748	4.30084	WBGene00220092	T24H10.12
X0688	chrII	9127790	9129320	1531	*	1531	9124971	9125239	-	upstream	-2551	2551	NearestLocation	1.58736	2.15652	3.84245	WBGene00220092	T24H10.12
X0689	chrII	9243064	9243672	609	*	609	9245905	9246786	-	downstream	3722	2233	NearestLocation	1.60854	2.65133	4.39572	WBGene00012035	T26C5.5
X0690	chrII	9272896	9273640	745	*	745	9271262	9273042	-	overlapStart	146	146	NearestLocation	1.48661	2.26709	3.9637	WBGene00007226	C01G6.4
X0691	chrII	9274435	9274747	313	*	313	9271262	9273042	-	upstream	-1393	1393	NearestLocation	1.42271	2.42968	4.14403	WBGene00007226	C01G6.4
X0692	chrII	9275076	9275494	419	*	419	9271262	9273042	-	upstream	-2034	2034	NearestLocation	1.56991	2.15318	3.83491	WBGene00007226	C01G6.4
X0693	chrII	9281431	9282140	710	*	710	9275054	9280098	-	upstream	-1333	1333	NearestLocation	1.47773	2.26049	3.95547	WBGene00007227	C01G6.5
X0694	chrII	9284338	9284674	337	*	337	9285932	9289136	+	upstream	-1594	1258	NearestLocation	1.35927	2.03172	3.70461	WBGene00006510	mtrr-1
X0695	chrII	9285027	9286353	1327	*	1327	9285932	9289136	+	overlapStart	-905	421	NearestLocation	1.51042	3.11906	4.90165	WBGene00006510	mtrr-1
X0696	chrII	9319700	9320036	337	*	337	9319865	9322045	+	overlapStart	-165	165	NearestLocation	1.38065	1.38258	2.96516	WBGene00008402	wdfy-2
X0697	chrII	9322034	9322954	921	*	921	9321855	9322909	-	overlapStart	875	45	NearestLocation	1.50155	2.59074	4.31879	WBGene00004286	rab-39
X0698	chrII	9323173	9323480	308	*	308	9321855	9322909	-	upstream	-264	264	NearestLocation	1.53491	3.10826	4.89975	WBGene00004286	rab-39
X0699	chrII	9323693	9324511	819	*	819	9323960	9324820	+	overlapStart	-267	267	NearestLocation	1.55885	1.93077	3.58719	WBGene00006520	tag-175
X0700	chrII	9352547	9352832	286	*	286	9350652	9352797	-	overlapStart	250	35	NearestLocation	1.54134	15.3213	18.1094	WBGene00006433	sdhb-1
X0701	chrII	9382391	9382801	411	*	411	9380106	9381355	-	upstream	-1036	1036	NearestLocation	1.49036	1.36898	2.95253	WBGene00007376	C06C3.5
X0702	chrII	9418494	9419055	562	*	562	9417919	9418007	-	upstream	-487	487	NearestLocation	1.60743	2.31973	4.02706	WBGene00201759	M176.14
X0703	chrII	9497095	9497398	304	*	304	9503510	9503530	-	downstream	6435	6112	NearestLocation	1.83186	4.60317	6.54061	WBGene00174785	21ur-15401
X0704	chrII	9591384	9591675	292	*	292	9591303	9592934	+	inside	81	81	NearestLocation	1.43375	1.55025	3.15565	WBGene00006473	tag-124
X0705	chrII	9618312	9618851	540	*	540	9615800	9617123	-	upstream	-1189	1189	NearestLocation	1.50651	1.99637	3.66372	WBGene00011788	T15H9.2
X0706	chrII	9621814	9624238	2425	*	2425	9617486	9624176	-	overlapStart	2362	62	NearestLocation	1.56089	2.91866	4.68043	WBGene00001038	dnj-20
X0707	chrII	9668771	9669045	275	*	275	9669324	9671499	+	upstream	-553	279	NearestLocation	1.71669	3.35781	5.1774	WBGene00006390	taf-8
X0708	chrII	9739875	9740432	558	*	558	9738935	9742884	-	inside	3009	940	NearestLocation	1.65766	3.28534	5.0986	WBGene00013144	Y53C12B.2
X0709	chrII	9741071	9741470	400	*	400	9738935	9742884	-	inside	1813	1414	NearestLocation	1.58274	2.32695	4.03121	WBGene00013144	Y53C12B.2
X0710	chrII	9741927	9742308	382	*	382	9738935	9742884	-	inside	957	576	NearestLocation	1.69773	4.70244	6.63937	WBGene00013144	Y53C12B.2
X0711	chrII	9937175	9937797	623	*	623	9934404	9936893	-	upstream	-282	282	NearestLocation	1.62973	4.07667	5.96092	WBGene00007330	C05C10.3
X0712	chrII	9938140	9938527	388	*	388	9938106	9938963	-	inside	823	34	NearestLocation	1.42547	1.67412	3.29857	WBGene00007334	C05C10.7
X0713	chrII	9974354	9974806	453	*	453	9971064	9975046	-	inside	692	240	NearestLocation	1.5017	2.11128	3.7861	WBGene00011276	aakg-5
X0714	chrII	10200545	10200832	288	*	288	10199810	10200819	-	overlapStart	274	13	NearestLocation	1.47286	1.92518	3.5833	WBGene00011040	R05H5.5
X0715	chrII	10248954	10249238	285	*	285	10248991	10251171	+	overlapStart	-37	37	NearestLocation	1.65173	15.5159	18.3171	WBGene00010015	atad-3
X0716	chrII	10349777	10350261	485	*	485	10346981	10350007	-	overlapStart	230	230	NearestLocation	1.45709	1.36076	2.93992	WBGene00007412	stip-1
X0717	chrII	10372505	10372916	412	*	412	10371154	10371174	+	downstream	1351	1331	NearestLocation	1.59218	2.19203	3.88303	WBGene00170796	21ur-14788
X0718	chrII	10383140	10383442	303	*	303	10382582	10382651	+	downstream	558	489	NearestLocation	1.71767	10.1739	12.5622	WBGene00200273	C07E3.15
X0719	chrII	10388151	10388908	758	*	758	10389765	10389975	-	downstream	1824	857	NearestLocation	1.59972	3.72346	5.57407	WBGene00198634	T09F3.6
X0720	chrII	10415707	10416279	573	*	573	10416786	10419418	+	upstream	-1079	507	NearestLocation	1.59206	2.64044	4.38214	WBGene00008480	E04D5.1
X0721	chrII	10416650	10417001	352	*	352	10416786	10419418	+	overlapStart	-136	136	NearestLocation	1.35382	1.9284	3.58511	WBGene00008480	E04D5.1
X0722	chrII	10446486	10447284	799	*	799	10448266	10450227	+	upstream	-1780	982	NearestLocation	1.73903	5.20678	7.19115	WBGene00014058	ZK673.2
X0723	chrII	10527544	10528278	735	*	735	10529447	10529798	+	upstream	-1903	1169	NearestLocation	1.37942	7.36258	9.52296	WBGene00198906	R166.8
X0724	chrII	10537489	10537773	285	*	285	10533857	10537671	-	overlapStart	182	102	NearestLocation	1.59926	9.34107	11.6651	WBGene00011302	R166.2
X0725	chrII	10547118	10547670	553	*	553	10545199	10545329	-	upstream	-1789	1789	NearestLocation	1.28762	5.34626	7.33958	WBGene00045074	R166.7
X0726	chrII	10594257	10594628	372	*	372	10593282	10594776	-	inside	519	148	NearestLocation	1.58896	2.62599	4.36495	WBGene00007557	C14A4.6
X0727	chrII	10661466	10661745	280	*	280	10660247	10660959	-	upstream	-507	507	NearestLocation	1.4767	10.076	12.4576	WBGene00008433	marc-2
X0728	chrII	10851756	10852285	530	*	530	10844530	10855554	-	inside	3798	3269	NearestLocation	1.50118	2.20679	3.89705	WBGene00010910	M106.2
X0729	chrII	10852900	10853234	335	*	335	10844530	10855554	-	inside	2654	2320	NearestLocation	1.54889	1.82554	3.47321	WBGene00010910	M106.2
X0730	chrII	10860108	10860628	521	*	521	10857473	10860909	-	inside	801	281	NearestLocation	1.82082	5.07446	7.05657	WBGene00010911	M106.3
X0731	chrII	10863017	10863822	806	*	806	10857473	10860909	-	upstream	-2108	2108	NearestLocation	1.48519	1.68664	3.31173	WBGene00010911	M106.3
X0732	chrII	10866811	10867298	488	*	488	10867116	10867172	-	includeFeature	361	126	NearestLocation	1.51018	2.38665	4.08991	WBGene00194808	mir-2216
X0733	chrII	10867548	10867835	288	*	288	10867116	10867172	-	upstream	-376	376	NearestLocation	1.55834	2.91031	4.68726	WBGene00194808	mir-2216
X0734	chrII	10917844	10918278	435	*	435	10918706	10920184	+	upstream	-862	428	NearestLocation	1.70991	3.76441	5.60679	WBGene00006530	tba-4
X0735	chrII	10918662	10918972	311	*	311	10918706	10920184	+	overlapStart	-44	44	NearestLocation	1.62103	2.42182	4.1435	WBGene00006530	tba-4
X0736	chrII	10945568	10946063	496	*	496	10943391	10945660	-	overlapStart	92	92	NearestLocation	1.45208	1.51297	3.11374	WBGene00010990	R03D7.4
X0737	chrII	11039954	11040486	533	*	533	11039449	11041206	-	inside	1252	505	NearestLocation	1.28396	4.54119	6.47236	WBGene00000472	cey-1
X0738	chrII	11176078	11176629	552	*	552	11175978	11176205	+	overlapEnd	100	100	NearestLocation	1.72196	3.42453	5.2518	WBGene00194956	F37H8.7
X0739	chrII	11423395	11423785	391	*	391	11424830	11430599	+	upstream	-1435	1045	NearestLocation	1.65411	4.66939	6.60767	WBGene00014666	C05D12.3
X0740	chrII	11438033	11438379	347	*	347	11435211	11438464	-	inside	431	85	NearestLocation	1.73335	7.90751	10.1179	WBGene00006915	vha-6
X0741	chrII	11455215	11455513	299	*	299	11453980	11455807	+	inside	1235	294	NearestLocation	1.28786	4.33684	6.23303	WBGene00004698	rsp-1
X0742	chrII	11468926	11469297	372	*	372	11468552	11469624	-	inside	698	327	NearestLocation	1.38808	5.21135	7.19814	WBGene00044026	cisd-1
X0743	chrII	11492490	11492933	444	*	444	11492517	11492666	+	includeFeature	-27	27	NearestLocation	1.52143	2.37803	4.0921	WBGene00200584	B0334.19
X0744	chrII	11576800	11577873	1074	*	1074	11574940	11577280	-	overlapStart	480	480	NearestLocation	1.88964	5.59812	7.60854	WBGene00003960	pcs-1
X0745	chrII	11618894	11619197	304	*	304	11619929	11620215	+	upstream	-1035	732	NearestLocation	1.67901	18.7982	21.8712	WBGene00198431	F07A11.10
X0746	chrII	11620350	11620741	392	*	392	11620025	11620295	+	downstream	325	55	NearestLocation	1.29994	5.61502	7.63378	WBGene00219879	F07A11.15
X0747	chrII	11652168	11652447	280	*	280	11651260	11652906	-	inside	738	459	NearestLocation	1.31623	5.47577	7.48233	WBGene00013924	rad-23
X0748	chrII	11693731	11694076	346	*	346	11691326	11695657	-	inside	1926	1581	NearestLocation	1.64884	12.6574	15.2333	WBGene00006617	tars-1
X0749	chrII	11695641	11695915	275	*	275	11691326	11695657	-	overlapStart	16	16	NearestLocation	1.48002	5.07309	7.0427	WBGene00006617	tars-1
X0750	chrII	11731668	11731956	289	*	289	11731226	11732594	-	inside	926	442	NearestLocation	1.6038	13.1036	15.7166	WBGene00008742	F13D12.8
X0751	chrII	11813767	11814435	669	*	669	11812296	11814108	-	overlapStart	341	327	NearestLocation	1.75898	6.03274	8.07401	WBGene00009660	F43G6.8
X0752	chrII	11916782	11917114	333	*	333	11916513	11918319	+	inside	269	269	NearestLocation	1.16526	1.81624	3.45785	WBGene00001977	hmg-12
X0753	chrII	11925627	11925922	296	*	296	11925411	11925486	+	downstream	216	141	NearestLocation	1.73001	17.2873	20.235	WBGene00195411	Y17G7A.2
X0754	chrII	11978511	11978812	302	*	302	11975967	11977659	-	upstream	-852	852	NearestLocation	1.30326	5.64655	7.67895	WBGene00012472	Y17G7B.21
X0755	chrII	12026148	12027934	1787	*	1787	12025886	12027746	-	overlapStart	1598	188	NearestLocation	1.85465	4.83095	6.7956	WBGene00012462	Y17G7B.8
X0756	chrII	12039584	12039971	388	*	388	12036831	12039139	-	upstream	-445	445	NearestLocation	1.50987	4.5663	6.4857	WBGene00006601	tpi-1
X0757	chrII	12040394	12041123	730	*	730	12041957	12042146	-	downstream	1752	834	NearestLocation	1.62767	5.18132	7.17244	WBGene00220134	Y17G7B.25
X0758	chrII	12042952	12043252	301	*	301	12042910	12049045	+	inside	42	42	NearestLocation	1.60857	8.18781	10.426	WBGene00012466	Y17G7B.13
X0759	chrII	12051237	12051529	293	*	293	12049583	12059889	+	inside	1654	1654	NearestLocation	1.46993	7.84307	10.0517	WBGene00012463	Y17G7B.10
X0760	chrII	12052670	12053075	406	*	406	12049583	12059889	+	inside	3087	3087	NearestLocation	1.99406	12.2116	14.7595	WBGene00012463	Y17G7B.10
X0761	chrII	12079557	12079981	425	*	425	12072070	12088861	-	inside	9304	7487	NearestLocation	1.8312	9.1689	11.4748	WBGene00000565	cnt-1
X0762	chrII	12102574	12103290	717	*	717	12092422	12099989	-	upstream	-2585	2585	NearestLocation	1.64423	5.19004	7.16826	WBGene00012468	Y17G7B.17
X0763	chrII	12162904	12163716	813	*	813	12164839	12170799	+	upstream	-1935	1123	NearestLocation	1.5834	2.16935	3.85552	WBGene00013253	Y57A10A.8
X0764	chrII	12185209	12185854	646	*	646	12186007	12189270	+	upstream	-798	153	NearestLocation	1.61631	2.54066	4.27331	WBGene00013257	Y57A10A.14
X0765	chrII	12186264	12186665	402	*	402	12186007	12189270	+	inside	257	257	NearestLocation	1.66177	2.92756	4.70147	WBGene00013257	Y57A10A.14
X0766	chrII	12261003	12261306	304	*	304	12264166	12266105	+	upstream	-3163	2860	NearestLocation	1.58392	14.4183	17.1338	WBGene00013266	Y57A10A.26
X0767	chrII	12349583	12349862	280	*	280	12349636	12349707	-	includeFeature	124	53	NearestLocation	1.70527	15.8229	18.6427	WBGene00023254
X0768	chrII	12351955	12352531	577	*	577	12345406	12352459	-	overlapStart	504	72	NearestLocation	1.52038	10.7739	13.1926	WBGene00004310	ras-1
X0769	chrII	12518327	12518715	389	*	389	12519086	12519217	+	upstream	-759	371	NearestLocation	1.66367	2.83091	4.59665	WBGene00220075	T21B4.20
X0770	chrII	12659756	12660282	527	*	527	12654747	12663836	+	inside	5009	3554	NearestLocation	1.44031	2.17789	3.86197	WBGene00012598	Y38E10A.20
X0771	chrII	12662651	12662949	299	*	299	12666159	12666230	-	downstream	3579	3210	NearestLocation	1.67979	8.4192	10.6645	WBGene00014873
X0772	chrII	12666079	12666399	321	*	321	12666159	12666230	-	includeFeature	151	80	NearestLocation	1.75451	18.3262	21.3564	WBGene00014873
X0773	chrII	12671439	12671820	382	*	382	12669995	12670067	-	upstream	-1372	1372	NearestLocation	1.38653	8.24624	10.484	WBGene00014872
X0774	chrII	12701105	12701379	275	*	275	12694412	12725483	+	inside	6693	6693	NearestLocation	1.71287	3.35495	5.17384	WBGene00012894	tbc-17
X0775	chrII	12767282	12767582	301	*	301	12767221	12768217	-	inside	935	61	NearestLocation	1.36902	7.76539	9.96131	WBGene00012903	vps-2
X0776	chrII	12797302	12797582	281	*	281	12787830	12796452	-	upstream	-850	850	NearestLocation	1.52013	13.2179	15.843	WBGene00012907	cpt-1
X0777	chrII	12806868	12807155	288	*	288	12800414	12805261	-	upstream	-1607	1607	NearestLocation	1.55787	14.5715	17.299	WBGene00012908	Y46G5A.18
X0778	chrII	12878522	12879285	764	*	764	12866448	12878104	-	upstream	-418	418	NearestLocation	1.47756	2.63069	4.36531	WBGene00001793	gsy-1
X0779	chrII	12896440	12897030	591	*	591	12895638	12897462	+	inside	802	432	NearestLocation	1.48472	8.93071	11.2069	WBGene00009394	clec-63
X0780	chrII	12930894	12931275	382	*	382	12930617	12933524	+	inside	277	277	NearestLocation	1.58734	2.82565	4.59024	WBGene00010266	dct-18
X0781	chrII	13013993	13014343	351	*	351	13009265	13012817	-	upstream	-1176	1176	NearestLocation	1.65371	2.70493	4.46058	WBGene00008932	F18A11.5
X0782	chrII	13016068	13016377	310	*	310	13009265	13012817	-	upstream	-3251	3251	NearestLocation	1.76008	3.83953	5.70346	WBGene00008932	F18A11.5
X0783	chrII	13016786	13017280	495	*	495	13020773	13021074	+	upstream	-3987	3493	NearestLocation	1.71296	3.62469	5.46484	WBGene00202000	Y38F1A.13
X0784	chrII	13020672	13020994	323	*	323	13020773	13021074	+	overlapStart	-101	80	NearestLocation	1.91618	6.97711	9.11235	WBGene00202000	Y38F1A.13
X0785	chrII	13022066	13022344	279	*	279	13020773	13021074	+	downstream	1293	992	NearestLocation	1.48457	9.25457	11.5737	WBGene00202000	Y38F1A.13
X0786	chrII	13023565	13023868	304	*	304	13014331	13025838	-	inside	2273	1970	NearestLocation	1.59848	11.4277	13.9041	WBGene00003144	max-2
X0787	chrII	13036551	13036827	277	*	277	13036345	13036883	-	inside	332	56	NearestLocation	1.41648	1.41117	2.99715	WBGene00008930	F18A11.3
X0788	chrII	13037115	13037399	285	*	285	13036345	13036883	-	upstream	-232	232	NearestLocation	1.55896	3.44222	5.26308	WBGene00008930	F18A11.3
X0789	chrII	13064808	13065113	306	*	306	13065381	13065520	-	downstream	712	268	NearestLocation	1.74271	10.805	13.2468	WBGene00200330	F42G4.9
X0790	chrII	13066911	13067236	326	*	326	13065381	13065520	-	upstream	-1391	1391	NearestLocation	1.58424	13.0431	15.6486	WBGene00200330	F42G4.9
X0791	chrII	13116339	13117048	710	*	710	13098249	13116801	-	overlapStart	462	247	NearestLocation	1.92607	6.22497	8.31216	WBGene00009245	rict-1
X0792	chrII	13117481	13118040	560	*	560	13117483	13122085	+	overlapStart	-2	2	NearestLocation	1.49852	9.48339	11.799	WBGene00009246	gfm-1
X0793	chrII	13165522	13165917	396	*	396	13160415	13165733	-	overlapStart	211	184	NearestLocation	1.83952	4.74493	6.68982	WBGene00003388	moe-3
X0794	chrII	13188145	13188644	500	*	500	13185987	13187334	-	upstream	-811	811	NearestLocation	1.4966	2.01978	3.68798	WBGene00012375	mecr-1
X0795	chrII	13189294	13189611	318	*	318	13185987	13187334	-	upstream	-1960	1960	NearestLocation	1.61465	15.6126	18.4201	WBGene00012375	mecr-1
X0796	chrII	13190076	13190629	554	*	554	13185987	13187334	-	upstream	-2742	2742	NearestLocation	1.73997	5.11149	7.07471	WBGene00012375	mecr-1
X0797	chrII	13190897	13191289	393	*	393	13193696	13193840	-	downstream	2943	2407	NearestLocation	1.54427	2.49137	4.21668	WBGene00195754	W09H1.7
X0798	chrII	13237435	13237811	377	*	377	13237405	13237908	-	inside	473	30	NearestLocation	1.80823	22.6018	25.9973	WBGene00008860	rmo-1
X0799	chrII	13279541	13279859	319	*	319	13283628	13283725	+	upstream	-4087	3769	NearestLocation	1.5847	13.0687	15.6746	WBGene00200945	Y48C3A.23
X0800	chrII	13290014	13290289	276	*	276	13279773	13285817	-	upstream	-4197	4197	NearestLocation	1.24676	2.40422	4.12294	WBGene00012988	ztf-22
X0801	chrII	13297627	13298211	585	*	585	13309290	13311479	+	upstream	-11663	11079	NearestLocation	1.32139	3.24975	5.05343	WBGene00012987	Y48C3A.3
X0802	chrII	13300502	13300840	339	*	339	13309290	13311479	+	upstream	-8788	8450	NearestLocation	1.34401	4.81544	6.76743	WBGene00012987	Y48C3A.3
X0803	chrII	13304318	13304959	642	*	642	13309290	13311479	+	upstream	-4972	4331	NearestLocation	1.86207	6.36029	8.42807	WBGene00012987	Y48C3A.3
X0804	chrII	13369071	13369986	916	*	916	13369057	13369157	-	overlapStart	86	14	NearestLocation	1.7589	5.17226	7.15316	WBGene00220170	Y48C3A.25
X0805	chrII	13447303	13448080	778	*	778	13442878	13447595	-	overlapStart	292	292	NearestLocation	1.86912	6.78722	8.88117	WBGene00008444	tbc-14
X0806	chrII	13451364	13451669	306	*	306	13442878	13447595	-	upstream	-3769	3769	NearestLocation	1.45355	8.49079	10.7394	WBGene00008444	tbc-14
X0807	chrII	13466573	13466918	346	*	346	13460991	13469602	-	inside	3029	2684	NearestLocation	1.51307	1.54963	3.15715	WBGene00008446	E01G4.3
X0808	chrII	13468567	13469143	577	*	577	13460991	13469602	-	inside	1035	459	NearestLocation	1.62644	2.51068	4.23913	WBGene00008446	E01G4.3
X0809	chrII	13469900	13470543	644	*	644	13460991	13469602	-	upstream	-298	298	NearestLocation	1.70971	3.41895	5.24131	WBGene00008446	E01G4.3
X0810	chrII	13477088	13478012	925	*	925	13477471	13478929	+	overlapStart	-383	383	NearestLocation	1.49605	1.56826	3.17627	WBGene00045410	E01G4.7
X0811	chrII	13494242	13494538	297	*	297	13493181	13494600	-	inside	358	62	NearestLocation	1.40221	9.33457	11.6534	WBGene00009740	F45H10.3
X0812	chrII	13509419	13509749	331	*	331	13507819	13516481	+	inside	1600	1600	NearestLocation	1.72492	14.9629	17.7201	WBGene00010070	nep-17
X0813	chrII	13542795	13543303	509	*	509	13533545	13541084	-	upstream	-1711	1711	NearestLocation	1.28811	2.83418	4.59684	WBGene00013001	Y48E1B.2
X0814	chrII	13668883	13669186	304	*	304	13669104	13669713	+	overlapStart	-221	82	NearestLocation	1.44277	8.22217	10.4528	WBGene00007841	C31C9.7
X0815	chrII	13670753	13671065	313	*	313	13669104	13669713	+	downstream	1649	1040	NearestLocation	1.68127	17.6227	20.6111	WBGene00007841	C31C9.7
X0816	chrII	13711294	13711857	564	*	564	13714202	13714262	+	upstream	-2908	2345	NearestLocation	1.42343	6.94864	9.05244	WBGene00195996	Y54G9A.11
X0817	chrII	13756278	13756655	378	*	378	13758414	13761227	+	upstream	-2136	1759	NearestLocation	2.03627	7.2	9.3526	WBGene00011054	arrd-13
X0818	chrII	13788573	13788895	323	*	323	13788897	13789046	-	downstream	473	2	NearestLocation	1.56486	9.74401	12.1006	WBGene00200813	C01B9.6
X0819	chrII	13790837	13791111	275	*	275	13792229	13817374	+	upstream	-1392	1118	NearestLocation	1.72411	11.8303	14.3507	WBGene00013934	ZK131.11
X0820	chrII	13814713	13815003	291	*	291	13817993	13818142	+	upstream	-3280	2990	NearestLocation	1.37643	3.76363	5.62986	WBGene00201623	ZK131.14
X0821	chrII	13845365	13846067	703	*	703	13847490	13847578	+	upstream	-2125	1423	NearestLocation	1.615	2.80262	4.56323	WBGene00197500	F08G2.14
X0822	chrII	13871723	13872357	635	*	635	13855785	13872294	-	overlapStart	571	63	NearestLocation	1.74772	7.86183	10.0716	WBGene00013093	Y51H1A.2
X0823	chrII	13872893	13873346	454	*	454	13872869	13875423	+	inside	24	24	NearestLocation	1.29281	5.69443	7.71446	WBGene00013094	Y51H1A.3
X0824	chrII	13951395	13951676	282	*	282	13951422	13951608	+	includeFeature	-27	27	NearestLocation	1.52212	5.67932	7.71436	WBGene00014549	W07G1.8
X0825	chrII	13952032	13952337	306	*	306	13951422	13951608	+	downstream	610	424	NearestLocation	1.67056	16.7439	19.6451	WBGene00014549	W07G1.8
X0826	chrII	13953956	13954232	277	*	277	13951422	13951608	+	downstream	2534	2348	NearestLocation	1.61331	13.838	16.5065	WBGene00014549	W07G1.8
X0827	chrII	14037492	14038055	564	*	564	14033233	14037721	-	overlapStart	229	229	NearestLocation	1.32924	4.61268	6.53523	WBGene00000901	daf-5
X0828	chrII	14065478	14065840	363	*	363	14063450	14065904	+	inside	2028	64	NearestLocation	1.34301	4.59732	6.50874	WBGene00002275	lem-2
X0829	chrII	14112499	14112776	278	*	278	14108127	14109221	-	upstream	-3278	3278	NearestLocation	1.62551	11.6954	14.2053	WBGene00010723	cpg-7
X0830	chrII	14155258	14155543	286	*	286	14155280	14155686	+	overlapStart	-22	22	NearestLocation	1.47366	11.8165	14.3365	WBGene00004456	rpl-43
X0831	chrII	14157548	14157841	294	*	294	14159455	14159602	+	upstream	-1907	1614	NearestLocation	1.49126	9.84863	12.2042	WBGene00220169	Y48B6A.25
X0832	chrII	14233803	14234231	429	*	429	14226377	14234120	-	overlapStart	317	111	NearestLocation	1.45288	3.48733	5.31804	WBGene00012983	men-1
X0833	chrII	14296683	14296982	300	*	300	14297297	14299843	+	upstream	-614	315	NearestLocation	1.42237	1.65427	3.27421	WBGene00013216	Y54G11A.7
X0834	chrII	14297267	14297807	541	*	541	14297297	14299843	+	overlapStart	-30	30	NearestLocation	1.7633	10.3837	12.7821	WBGene00013216	Y54G11A.7
X0835	chrII	14298248	14298558	311	*	311	14297297	14299843	+	inside	951	951	NearestLocation	1.6111	4.75616	6.70463	WBGene00013216	Y54G11A.7
X0836	chrII	14299145	14299505	361	*	361	14297297	14299843	+	inside	1848	338	NearestLocation	1.50009	7.43733	9.59861	WBGene00013216	Y54G11A.7
X0837	chrII	14337683	14338338	656	*	656	14340006	14344454	-	downstream	6771	1668	NearestLocation	1.44003	3.78478	5.63344	WBGene00013217	ddl-3
X0838	chrII	14347881	14348155	275	*	275	14347125	14348794	-	inside	913	639	NearestLocation	1.54184	9.01095	11.3138	WBGene00002996	lin-7
X0839	chrII	14348673	14349490	818	*	818	14348892	14349406	-	includeFeature	733	84	NearestLocation	1.60833	5.19591	7.17127	WBGene00185067	Y54G11A.17
X0840	chrII	14400079	14400358	280	*	280	14399565	14399629	-	upstream	-450	450	NearestLocation	1.18659	2.47805	4.19655	WBGene00195007	mir-5595
X0841	chrII	14482071	14482370	300	*	300	14483493	14483513	-	downstream	1442	1123	NearestLocation	1.65534	10.2455	12.6303	WBGene00171718	21ur-11165
X0842	chrII	14528821	14529098	278	*	278	14528754	14534115	+	inside	67	67	NearestLocation	1.35893	1.42581	3.01435	WBGene00010198	spat-1
X0843	chrII	14533057	14533340	284	*	284	14534298	14535266	+	upstream	-1241	958	NearestLocation	1.58184	12.0065	14.5381	WBGene00007312	C04H5.1
X0844	chrII	14563805	14564093	289	*	289	14562214	14564011	-	overlapStart	206	82	NearestLocation	1.80337	15.8531	18.693	WBGene00044053	C01G12.12
X0845	chrII	14568542	14568825	284	*	284	14571840	14571925	+	upstream	-3298	3015	NearestLocation	1.80959	17.8948	20.8824	WBGene00201201	C01G12.14
X0846	chrII	14598024	14600557	2534	*	2534	14600902	14610551	+	upstream	-2878	345	NearestLocation	1.78609	4.30056	6.20095	WBGene00006603	tps-2
X0847	chrII	14601608	14601901	294	*	294	14600902	14610551	+	inside	706	706	NearestLocation	1.85907	5.58401	7.61373	WBGene00006603	tps-2
X0848	chrII	14664747	14665052	306	*	306	14647327	14666943	-	inside	2196	1891	NearestLocation	1.41487	7.01269	9.13873	WBGene00006787	unc-52
X0849	chrII	14728856	14730686	1831	*	1831	14720552	14733524	-	inside	4668	2838	NearestLocation	1.64981	2.73356	4.48416	WBGene00007480	glna-1
X0850	chrII	14797563	14797882	320	*	320	14798472	14800930	+	upstream	-909	590	NearestLocation	1.42885	7.06909	9.21816	WBGene00013196	tbc-20
X0851	chrII	14811849	14812229	381	*	381	14812567	14814892	+	upstream	-718	338	NearestLocation	1.34222	1.56762	3.17575	WBGene00012182	osta-3
X0852	chrII	14815521	14815816	296	*	296	14815518	14816212	+	inside	3	3	NearestLocation	1.64335	14.2089	16.907	WBGene00012179	W01D2.1
X0853	chrII	14821931	14822247	317	*	317	14815518	14816212	+	downstream	6413	5719	NearestLocation	1.61774	3.60391	5.44819	WBGene00012179	W01D2.1
X0854	chrII	15042523	15043046	524	*	524	15042805	15044011	-	overlapEnd	1488	241	NearestLocation	2.04757	17.1675	20.097	WBGene00044728	Y53F4B.45
X0855	chrII	15073569	15074380	812	*	812	15064691	15071666	-	upstream	-1903	1903	NearestLocation	1.88868	5.92111	7.96675	WBGene00013164	Y53F4B.18
X0856	chrII	15074843	15075990	1148	*	1148	15077273	15079475	+	upstream	-2430	1283	NearestLocation	1.9344	5.92163	7.98032	WBGene00013165	Y53F4B.19
X0857	chrII	15112050	15112357	308	*	308	15110144	15116319	+	inside	1906	1906	NearestLocation	1.65748	12.9	15.4996	WBGene00013176	Y53F4B.39
X0858	chrII	15173387	15173783	397	*	397	15174271	15174965	-	downstream	1578	488	NearestLocation	1.53631	1.95384	3.61415	WBGene00001779	gst-31
X0859	chrII	15190315	15191115	801	*	801	15183809	15185385	-	upstream	-4930	4930	NearestLocation	1.73971	3.70599	5.55046	WBGene00001783	gst-35
X0860	chrII	15203559	15204078	520	*	520	15206833	15206982	-	downstream	3423	2755	NearestLocation	1.42605	7.69254	9.89918	WBGene00201885	Y46E12BR.2
X0861	chrII	15204921	15205239	319	*	319	15206833	15206982	-	downstream	2061	1594	NearestLocation	1.63315	14.1083	16.7958	WBGene00201885	Y46E12BR.2
X0862	chrII	15206175	15206856	682	*	682	15206833	15206982	-	overlapEnd	807	23	NearestLocation	1.57141	8.43551	10.6829	WBGene00201885	Y46E12BR.2
X0863	chrII	15207969	15208675	707	*	707	15207443	15229509	+	inside	526	526	NearestLocation	1.3404	1.79437	3.4322	WBGene00021597	spsb-1
X0864	chrII	15209270	15209595	326	*	326	15207443	15229509	+	inside	1827	1827	NearestLocation	1.84364	13.875	16.5455	WBGene00021597	spsb-1
X0865	chrII	15220111	15220447	337	*	337	15216569	15216638	+	downstream	3542	3473	NearestLocation	1.36414	6.27438	8.35093	WBGene00220162	Y46E12BM.1
X0866	chrII	15235639	15235940	302	*	302	15233153	15244959	+	inside	2486	2486	NearestLocation	1.54245	12.3023	14.8492	WBGene00021595	Y46E12BL.2
X0867	chrII	15258410	15258690	281	*	281	15257371	15259799	+	inside	1039	1039	NearestLocation	1.67154	10.3316	12.73	WBGene00219753	linc-152
X0868	chrII	15261057	15261364	308	*	308	15263177	15263458	+	upstream	-2120	1813	NearestLocation	1.47234	7.00402	9.13225	WBGene00201093	Y46E12BL.9
X0869	chrII	15264659	15264937	279	*	279	15264825	15264885	+	includeFeature	-166	52	NearestLocation	1.44235	8.68193	10.9528	WBGene00201913	2RSSE.8
X0870	chrII	15268254	15268609	356	*	356	15268212	15275689	+	inside	42	42	NearestLocation	1.5856	14.277	16.9829	WBGene00007064	2RSSE.1
[truncated: 1,875 more rows]

## Sheet: CBP-dependent UPRmt genes (134)
Peak	seqnames	start	end	width	strand	summit	start_position	end_position	feature_strand	insideFeature	distancetoFeature	shortestDistance	fromOverlappingOrNearest	fold.enrichment	FDR/-log10 qvalue	score	Gene ID	symbol	Acetylation mark
[truncated: 265 more rows]
